# Supplementary material for: Transcriptome and Metabolome Analyses Reveal Mechanisms Underlying the Response of Quinoa Seedlings to Nitrogen Fertilizers
Source: MDPI journal article supplement (doi:10.3390/ijms241411580), 2023-07-18
Supplement: s1 [file s1]

**Table S3** Common differential metabolites between red quinoa and white quinoa in HN vs CK

| Number | Index      | Formula    | Compounds                                                  | Class I         | VIP      | p_value  | Fold_Change | Log2FC    | Type |
|--------|------------|------------|------------------------------------------------------------|-----------------|----------|----------|-------------|-----------|------|
| 1      | mws0885    | C7H6O4     | 2,4-Dihydroxybenzoic acid                                  | Phenolic acids  | 1.50E+00 | 2.43E-02 | 4.60E-01    | -1.12E+00 | down |
|        |            |            |                                                            | Amino acids and |          |          |             |           |      |
| 2      | Zmyn000155 | C7H14N2O3  | N- $\alpha$ -Acetyl-L-ornithine                            | derivatives     | 1.41E+00 | 2.25E-01 | 2.57E+00    | 1.36E+00  | up   |
|        |            |            |                                                            | Amino acids and |          |          |             |           |      |
| 3      | pme0008    | C6H13N3O3  | L-Citrulline                                               | derivatives     | 1.16E+00 | 1.92E-01 | 2.06E+00    | 1.04E+00  | up   |
| 4      | mws0361    | C16H30O2   | Palmitoleic Acid                                           | Lipids          | 1.84E+00 | 1.66E-04 | 5.69E+00    | 2.51E+00  | up   |
| 5      | pmp001245  | C15H22NO4+ | Feruloylcholine                                            | Alkaloids       | 1.54E+00 | 1.99E-01 | 2.99E+00    | 1.58E+00  | up   |
| 6      | MWS2673    | C20H34O4   | 5,6-DiHETrE [5,6-dihydroxy-8Z,11Z,14Z-eicosatrienoic acid] | Lipids          | 1.51E+00 | 5.38E-02 | 2.05E+00    | 1.04E+00  | up   |
| 7      | MWStz224   | C20H20N2O4 | N-Feruloylserotonin                                        | Alkaloids       | 1.33E+00 | 1.65E-01 | 3.15E+00    | 1.66E+00  | up   |
| 8      | MWStz202   | C20H20N2O4 | cis-Moschamine                                             | Alkaloids       | 1.76E+00 | 4.06E-03 | 3.04E+00    | 1.60E+00  | up   |
|        |            |            | Neochlorogenic acid (5-O-Caffeoylquinic                    |                 |          |          |             |           |      |
| 9      | pme1816    | C16H18O9   | acid)*                                                     | Phenolic acids  | 1.21E+00 | 3.24E-01 | 2.07E+00    | 1.05E+00  | up   |
|        |            |            | Chlorogenic acid (3-O-Caffeoylquinic                       |                 |          |          |             |           |      |
| 10     | mws0178    | C16H18O9   | acid)*                                                     | Phenolic acids  | 1.27E+00 | 2.77E-01 | 2.26E+00    | 1.17E+00  | up   |
| 11     | mws1313    | C20H20O7   | 5,6,7,3',4'-pentamethoxyflavone                            | Flavonoids      | 1.88E+00 | 1.57E-05 | 6.11E+00    | 2.61E+00  | up   |
| 12     | HJN086     | C21H22O11  | Eriodictyol-3'-O-glucoside                                 | Flavonoids      | 1.32E+00 | 8.28E-02 | 4.78E-01    | -1.06E+00 | down |
| 13     | pme2125    | C18H32O16  | Raffinose                                                  | Others          | 1.53E+00 | 4.16E-02 | 4.82E-01    | -1.05E+00 | down |
| 14     | pmn001382  | C25H24O12  | Isochlorogenic acid A                                      | Phenolic acids  | 1.63E+00 | 3.53E-03 | 8.49E+00    | 3.09E+00  | up   |
| 15     | MWSmce346  | C25H24O12  | 1,3-Dicaffeoylquinic acid                                  | Phenolic acids  | 1.86E+00 | 3.33E-03 | 1.16E+01    | 3.53E+00  | up   |
| 16     | Li512115   | C25H24O12  | Isochlorogenic acid B*                                     | Phenolic acids  | 1.78E+00 | 3.35E-03 | 5.57E+00    | 2.48E+00  | up   |
| 17     | pmn001384  | C25H24O12  | Isochlorogenic acid C*                                     | Phenolic acids  | 1.76E+00 | 7.06E-03 | 7.61E+00    | 2.93E+00  | up   |
|        |            |            |                                                            | Lignans and     |          |          |             |           |      |
| 18     | Lmbn001181 | C22H28O15  | Fraxetin-7,8-di-O-glucoside                                | Coumarins       | 1.43E+00 | 3.38E-02 | 2.41E+00    | 1.27E+00  | up   |
| 19     | MWSHY0056  | C27H32O14  | Naringenin-7-O-Rutinoside(Narirutin)                       | Flavonoids      | 1.40E+00 | 2.09E-01 | 2.67E+00    | 1.42E+00  | up   |
| 20     | Hmcp001578 | C28H32O17  | Isorhamnetin-3,7-O-diglucoside                             | Flavonoids      | 1.50E+00 | 1.31E-01 | 2.60E+00    | 1.38E+00  | up   |
| 21     | pmp000117  | C22H24O9   | 3,5,6,7,8,3',4'-Heptamethoxyflavone                        | Flavonoids      | 1.49E+00 | 1.43E-02 | 4.45E-01    | -1.17E+00 | down |
|        |            |            | Apigenin-8-C-glucoside-7-O-Sophorosi                       |                 |          |          |             |           |      |
| 22     | pmb0639    | C33H40O20  | de                                                         | Flavonoids      | 1.07E+00 | 3.35E-01 | 2.17E+00    | 1.12E+00  | up   |
