# Supplementary material for: Transcriptome and Metabolome Analyses Reveal Mechanisms Underlying the Response of Quinoa Seedlings to Nitrogen Fertilizers
Source: MDPI journal article supplement (doi:10.3390/ijms241411580), 2023-07-18
Supplement: s1 [file s1]

**Table S4** Commom differential metabolites between red quinoa and white quinoa in LN vs HN

| number | Index      | Formula       | Compounds                                           | Class I         | VIP      | p_value  | Fold_Change | Log2FC    | Type |
|--------|------------|---------------|-----------------------------------------------------|-----------------|----------|----------|-------------|-----------|------|
| 1      | pmf0256    | C6H14O        | 3-Methyl-1-pentanol                                 | Others          | 1.26E+00 | 8.20E-03 | 4.28E-01    | -1.22E+00 | down |
|        |            |               |                                                     | Nucleotides and |          |          |             |           |      |
| 2      | mws0255    | C4H5N3O       | Cytosine                                            | derivatives     | 1.19E+00 | 4.39E-02 | 2.55E+00    | 1.35E+00  | up   |
| 3      | pme2122    | C5H9N3        | Histamine                                           | Alkaloids       | 1.23E+00 | 4.29E-02 | 4.21E+00    | 2.08E+00  | up   |
| 4      | MWS0811    | C6H11NO2      | DL-Pipecolic Acid                                   | Organic acids   | 1.06E+00 | 2.75E-01 | 4.19E+00    | 2.07E+00  | up   |
|        |            |               |                                                     | Amino acids and |          |          |             |           |      |
| 5      | pme2527    | C5H12N2O2     | L-Ornithine                                         | derivatives     | 1.34E+00 | 4.08E-04 | 1.30E+01    | 3.70E+00  | up   |
|        |            |               |                                                     | Nucleotides and |          |          |             |           |      |
| 6      | pme0040    | C5H5N5        | Adenine                                             | derivatives     | 1.30E+00 | 1.14E-03 | 3.36E+00    | 1.75E+00  | up   |
|        |            |               |                                                     | Nucleotides and |          |          |             |           |      |
| 7      | pme0033    | C5H4N4O       | Hypoxanthine                                        | derivatives     | 1.31E+00 | 1.99E-02 | 5.10E+00    | 2.35E+00  | up   |
|        |            |               |                                                     | Amino acids and |          |          |             |           |      |
| 8      | mws0254    | C6H9N3O2      | L-Histidine                                         | derivatives     | 1.32E+00 | 1.92E-02 | 3.61E+00    | 1.85E+00  | up   |
| 9      | MWS0559    | C6H10O5       | 1,6-anhydro-β-D-glucose                             | Others          | 1.17E+00 | 1.04E-01 | 4.47E-01    | -1.16E+00 | down |
|        |            |               |                                                     | Amino acids and |          |          |             |           |      |
| 10     | Zmyn000155 | C7H14N2O3     | N-α-Acetyl-L-ornithine                              | derivatives     | 1.36E+00 | 1.70E-02 | 9.15E+01    | 6.52E+00  | up   |
|        |            |               |                                                     | Amino acids and |          |          |             |           |      |
| 11     | mws0260    | C6H14N4O2     | L-Arginine                                          | derivatives     | 1.33E+00 | 1.68E-02 | 2.10E+01    | 4.39E+00  | up   |
| 12     | pme0278    | C7H14N2O4     | 2,6-Diaminoimelic acid                              | Organic acids   | 1.31E+00 | 6.12E-02 | 1.24E+01    | 3.64E+00  | up   |
|        |            |               |                                                     | Amino acids and |          |          |             |           |      |
| 13     | pme2743    | C10H11NO3     | N-Phenylacetyl glycine                              | derivatives     | 1.30E+00 | 6.99E-02 | 5.52E+00    | 2.46E+00  | up   |
| 14     | mws1189    | C6H10O7       | D-Galacturonic acid*                                | Organic acids   | 1.23E+00 | 7.22E-03 | 3.31E+00    | 1.73E+00  | up   |
| 15     | Lmlp003161 | C14H20N2O3    | N-Feruloylputrescine                                | Alkaloids       | 1.05E+00 | 2.42E-01 | 5.81E+00    | 2.54E+00  | up   |
| 16     | pmp001245  | C15H22NO4+    | Feruloylcholine                                     | Alkaloids       | 1.30E+00 | 9.70E-02 | 6.37E+00    | 2.67E+00  | up   |
| 17     | ML10195036 | C18H37NO2     | 3-Dehydrosphinganine                                | Lipids          | 1.33E+00 | 5.82E-04 | 3.41E+00    | 1.77E+00  | up   |
|        |            |               | 9,12,13-TriHOME;                                    |                 |          |          |             |           |      |
| 18     | Lmbn003970 | C18H34O5      | 9(S),12(S),13(S)-Trihydroxy-10(E)-octadecenoic acid | Lipids          | 1.35E+00 | 6.03E-03 | 2.67E+00    | 1.42E+00  | up   |
| 19     | MWStz202   | C20H20N2O4    | cis-Moschamine                                      | Alkaloids       | 1.17E+00 | 8.50E-02 | 5.93E+00    | 2.57E+00  | up   |
| 20     | Lmdp003509 | C20H18O11     | Quercetin-3-O-xyloside (Reynoutrin)                 | Flavonoids      | 1.24E+00 | 3.43E-02 | 3.69E+00    | 1.88E+00  | up   |
| 21     | pmp000438  | C30H50O2      | Betulin                                             | Terpenoids      | 1.06E+00 | 1.77E-01 | 3.94E+01    | 5.30E+00  | up   |
| 22     | pme2125    | C18H32O16     | Raffinose                                           | Others          | 1.15E+00 | 6.52E-02 | 3.27E-01    | -1.61E+00 | down |
|        |            |               |                                                     | Nucleotides and |          |          |             |           |      |
| 23     | mws1409    | C15H22N2O18P2 | Uridine-5'-diphosphoglucuronic acid                 | derivatives     | 1.26E+00 | 1.44E-02 | 2.45E-01    | -2.03E+00 | down |
| 24     | Hmlp002975 | C28H30O17     | Isorhamnetin-3-O-glucuronide-7-O-rhamnoside         | Flavonoids      | 1.30E+00 | 4.68E-02 | 4.26E+00    | 2.09E+00  | up   |
| 25     | Hmcp001578 | C28H32O17     | Isorhamnetin-3,7-O-diglucoside                      | Flavonoids      | 1.25E+00 | 5.04E-02 | 2.31E+00    | 1.21E+00  | up   |
| 26     | Lmsp003252 | C28H32O17     | Isorhamnetin-3-O-sophoroside                        | Flavonoids      | 1.28E+00 | 5.89E-02 | 2.84E+00    | 1.51E+00  | up   |
| 27     | Lmmp002334 | C33H40O21     | Quercetin-3-O-rutinoside-7-O-glucoside              | Flavonoids      | 1.33E+00 | 9.59E-03 | 3.55E+00    | 1.83E+00  | up   |
| 28     | Hmmp006067 | C42H68O13     | Oleanolic acid-3-O-glucosyl(1→2)glucoside           | Terpenoids      | 1.12E+00 | 1.05E-01 | 9.26E+00    | 3.21E+00  | up   |
| 29     | pmb0620    | C34H42O21     | Chrysoeriol-6,8-di-C-glucoside-7-O-glucoside        | Flavonoids      | 1.20E+00 | 1.21E-02 | 2.56E+00    | 1.36E+00  | up   |
