# Supplementary material for: Transcriptome and Metabolome Analyses Reveal Mechanisms Underlying the Response of Quinoa Seedlings to Nitrogen Fertilizers
Source: MDPI journal article supplement (doi:10.3390/ijms241411580), 2023-07-18
Supplement: s1 [file s1]

**Table S2** Commom differential metabolites between red quinoa and white quinoa in LN vs CK

| number | Index      | Formula   | Compounds                                      | Class I                     | VIP      | p_value  | Fold_Change | Log2FC    | Type |
|--------|------------|-----------|------------------------------------------------|-----------------------------|----------|----------|-------------|-----------|------|
| 1      | pme1816    | C16H18O9  | Neochlorogenic acid (5-O-Caffeoylquinic acid)* | Phenolic acids              | 1.60E+00 | 9.33E-02 | 2.64E+00    | 1.40E+00  | up   |
| 2      | pmf0256    | C6H14O    | 3-Methyl-1-pentanol                            | Others                      | 1.55E+00 | 8.63E-03 | 2.46E+00    | 1.30E+00  | up   |
| 3      | mws0178    | C16H18O9  | Chlorogenic acid (3-O-Caffeoylquinic acid)*    | Phenolic acids              | 1.65E+00 | 4.06E-02 | 2.34E+00    | 1.23E+00  | up   |
| 4      | pmp000117  | C22H24O9  | 3,5,6,7,8,3',4'-Heptamethoxyflavone            | Flavonoids                  | 1.49E+00 | 1.43E-02 | 4.45E-01    | -1.17E+00 | down |
| 5      | mws0255    | C4H5N3O   | Cytosine                                       | Nucleotides and derivatives | 1.60E+00 | 9.52E-03 | 3.90E-01    | -1.36E+00 | down |
| 6      | pme2122    | C5H9N3    | Histamine                                      | Alkaloids                   | 1.54E+00 | 1.26E-02 | 3.33E-01    | -1.59E+00 | down |
| 7      | mws1336    | C7H7NO2   | 4-Aminobenzoic acid                            | Phenolic acids              | 1.08E+00 | 2.80E-02 | 3.14E-01    | -1.67E+00 | down |
| 8      | Hmbn005207 | C30H48O4  | Hederagenin                                    | Terpenoids                  | 1.12E+00 | 3.27E-01 | 2.93E-01    | -1.77E+00 | down |
| 9      | Zmyn000155 | C7H14N2O3 | N- $\alpha$ -Acetyl-L-ornithine                | Amino acids and derivatives | 1.69E+00 | 5.23E-02 | 2.00E-01    | -2.32E+00 | down |
| 10     | pmp000438  | C30H50O2  | Betulin                                        | Terpenoids                  | 1.21E+00 | 3.00E-01 | 1.72E-01    | -2.54E+00 | down |
| 11     | pme0278    | C7H14N2O4 | 2,6-Diaminoimelic acid                         | Organic acids               | 1.67E+00 | 1.30E-02 | 1.21E-01    | -3.05E+00 | down |
