# Supplementary material for: Transcriptome and Metabolome Analyses Reveal Mechanisms Underlying the Response of Quinoa Seedlings to Nitrogen Fertilizers
Source: MDPI journal article supplement (doi:10.3390/ijms241411580), 2023-07-18
Supplement: s1 [file s1]

**Table S5** Data quality statistics of quinoa transcriptome

| Sample | Total Reads | Reads mapped     | Unique mapped    | Multi mapped     | Q30(%) | GC Content(%) |
|--------|-------------|------------------|------------------|------------------|--------|---------------|
| R1-4   | 50196648    | 47694939(95.02%) | 42046202(83.76%) | 15242801(11.25%) | 93.9   | 43.31         |
| R1-5   | 51332586    | 49422483(96.28%) | 40858695(79.60%) | 26669283(16.68%) | 94.51  | 43.45         |
| R1-6   | 46839506    | 43977583(93.89%) | 35881301(76.60%) | 23388211(17.29%) | 92.81  | 43.29         |
| R2-4   | 48569484    | 46944266(96.65%) | 42492053(87.49%) | 11400537(9.17%)  | 94.58  | 43.39         |
| R2-5   | 46363050    | 44390962(95.75%) | 40139891(86.58%) | 11068438(9.17%)  | 91.81  | 43.57         |
| R2-6   | 54550166    | 47319494(86.74%) | 35086377(64.32%) | 32912906(22.43%) | 94.48  | 45.58         |
| R3-4   | 41087168    | 38541570(93.80%) | 26897339(65.46%) | 36849033(28.34%) | 91.89  | 43.78         |
| R3-5   | 44650396    | 43102840(96.53%) | 39550539(88.58%) | 8404828(7.96%)   | 94.32  | 44.29         |
| R3-6   | 43852582    | 42181445(96.19%) | 37686481(85.94%) | 11998437(10.25%) | 94.12  | 43.96         |
| W1-4   | 49174948    | 46847221(95.27%) | 43483023(88.43%) | 7635347(6.84%)   | 93.47  | 43.49         |
| W1-5   | 49075774    | 46835697(95.44%) | 40421003(82.36%) | 17026942(13.07%) | 94.64  | 43.56         |
| W1-6   | 53796560    | 50917334(94.65%) | 42754689(79.47%) | 22571047(15.17%) | 94.26  | 43.46         |
| W2-4   | 44246504    | 35500134(80.23%) | 32655171(73.80%) | 5836412(6.43%)   | 92.33  | 45.87         |
| W2-5   | 51326632    | 49154482(95.77%) | 45500170(88.65%) | 8605022(7.12%)   | 94.13  | 43.41         |
| W2-6   | 53489678    | 51026476(95.39%) | 45448734(84.97%) | 12799980(10.43%) | 94.19  | 43.61         |
| W3-4   | 52173672    | 49357885(94.60%) | 43282963(82.96%) | 15283985(11.64%) | 93.94  | 43.35         |
| W3-5   | 66907910    | 62572767(93.52%) | 57776333(86.35%) | 10854957(7.17%)  | 94.12  | 42.77         |
| W3-6   | 42814612    | 42006998(98.11%) | 38685792(90.36%) | 5184662(7.76%)   | 92.51  | 47.20         |
