# Supplementary material for: Transcriptome and Metabolome Analyses Reveal Mechanisms Underlying the Response of Quinoa Seedlings to Nitrogen Fertilizers
Source: MDPI journal article supplement (doi:10.3390/ijms241411580), 2023-07-18
Supplement: s1 [file s1]

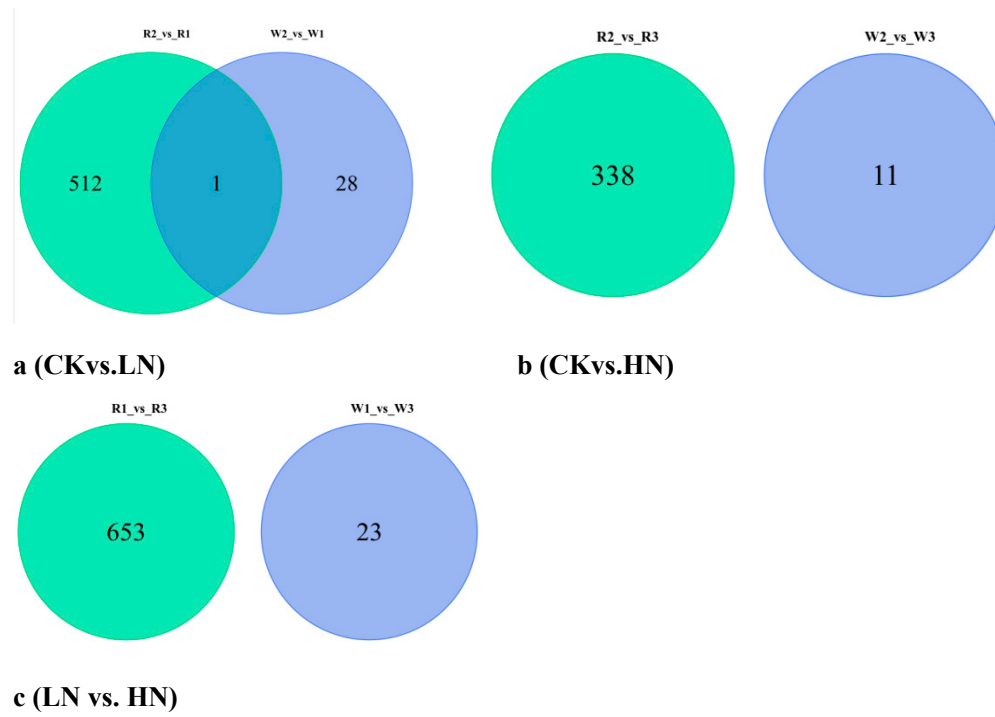

**Figure S6** (a) Venn diagram of DEGs for CK-Rvs.LN-R and CK-Wvs.LN-W. (b) Venn diagram of DEGs for CK-Rvs.HN-R and CK-Wvs.HN-W. (c) Venn diagram of DEGs for LN-Rvs.HN-R and LN-Wvs.HN-W.
