# Supplementary material for: Transcriptome and Metabolome Analyses Reveal Mechanisms Underlying the Response of Quinoa Seedlings to Nitrogen Fertilizers
Source: MDPI journal article supplement (doi:10.3390/ijms241411580), 2023-07-18
Supplement: s1 [file s1]

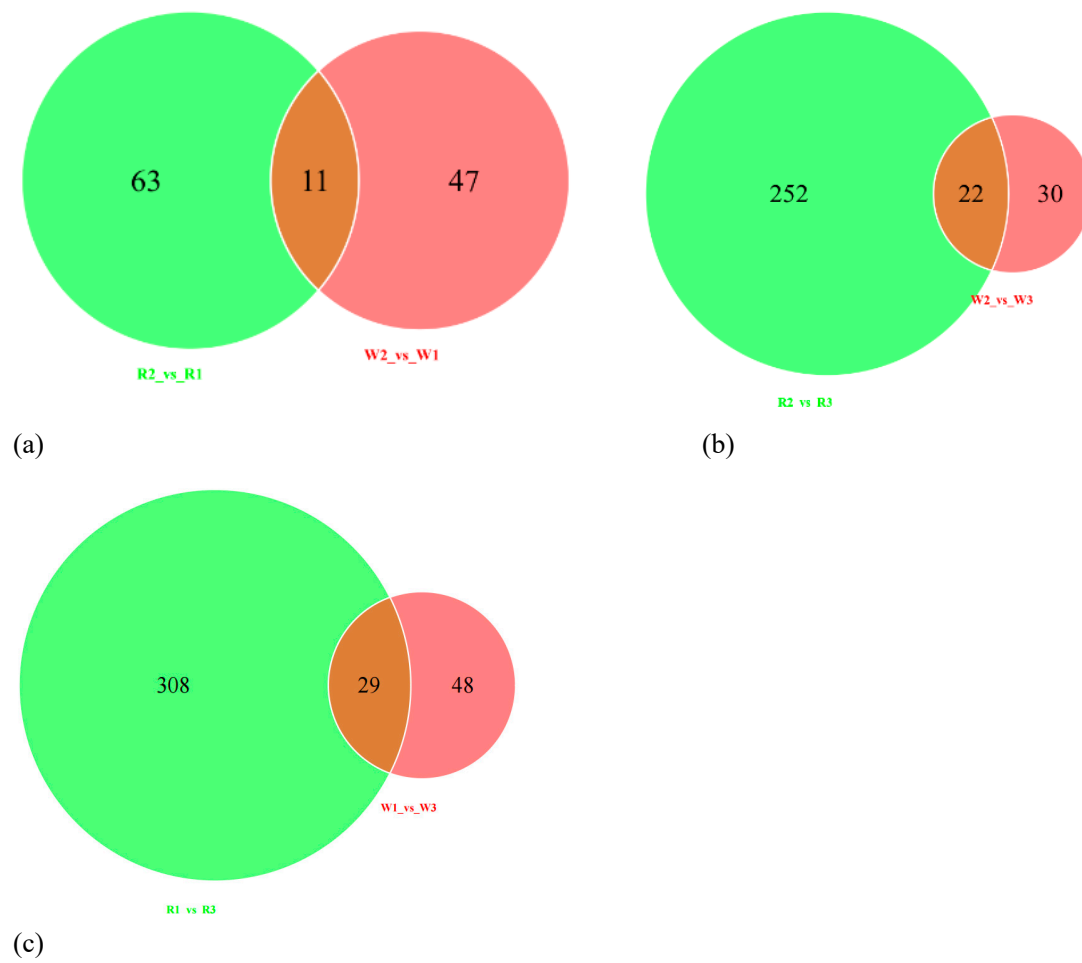

**Figure S3** (a) Venn diagram of DEMs for CK-R vs. LN-R and CK-W vs. LN-W. (b) Venn diagram of DEMs for CK-R vs. HN-R and CK-W vs. HN-W. (c) Venn diagram of DEMs for LN-R vs. HN-R and LN-W vs. HN-W.
