# Supplementary material for: Transcriptome and Metabolome Analyses Reveal Mechanisms Underlying the Response of Quinoa Seedlings to Nitrogen Fertilizers
Source: Int J Mol Sci. 2023 Jul 18;24(14):11580. doi: 10.3390/ijms241411580 (PMC10380953; doi:10.3390/ijms241411580)
Supplement: Supplementary file 1 [file ijms-24-11580-s001.zip › Table S1.xlsx]

## Sheet: Sheet1
Table S1 Metabolites detected based on UPLC-MS/MS detection platform and self built database
Index	Q1 (Da)	Q3 (Da)	Molecular Weight (Da)	Formula	Ionization model	Compounds	Class I	Class II	CAS	Level	W2-1	W2-2	W2-3	W1-1	W1-2	W1-3	W3-1	W3-2	W3-3	R2-1	R2-2	R2-3	R1-1	R1-2	R1-3	R3-1	R3-2	R3-3	mix01	mix02	mix03	mix04	mix05	mix06	mix07	mix08	cpd_ID	kegg_map
pme3200	74	57	73.064	C2H7N3	[M+H]+	1-Methylguanidine	Nucleotides and derivatives	Nucleotides and derivatives	471-29-4	3	20233	40125	41191	35100	36168	38645	30149	2373.1	47574	62477	54472	49223	58739	58973	48671	47821	35473	51109	36716	53382	70344	41473	68940	60717	61205	34229	C02294	--
pmb0782	86.1	69.2	85.089	C5H11N	[M+H]+	Piperidine	Alkaloids	Piperidine alkaloids	110-89-4	3	2893500	2834000	2947700	2968600	3108400	3059800	3697400	5324600	3760500	5473000	3787800	5605200	3054500	3146400	3373000	10651000	9151000	8664400	4812500	5390000	5671000	6952600	5299500	5448400	5392600	5467000	C01746	ko00960
pme2292	89.11	72.08	88.1	C4H12N2	[M+H]+	Putrescine	Alkaloids	Alkaloids	110-60-1	3	402090	438160	494680	351690	353240	344730	393110	703310	641700	685360	514740	783950	281370	310840	290400	627460	911640	480130	550060	466590	508240	559720	470180	583080	478290	455040	C00134	ko00330,ko00472,ko00480,ko00960,ko01100,ko01110,ko02010
ML10198895	88.04	88.04	89.048	C3H7NO2	[M-H]-	N-Methylglycine	Amino acids and derivatives	Amino acids and derivatives	107-97-1	3	10046	6163.2	5089.8	5632.2	16204	13390	5563.5	4493.5	10737	6712.5	10183	8472.2	9579	4019	4535	8945	10580	4752.2	6754.5	3791.4	10142	6729.5	3339.5	3893	5112.5	7291.8	C00213	ko00260,ko00330,ko01100
pmf0096	88.99	70.9	89.995	C2H2O4	[M-H]-	Oxalic acid	Organic acids	Organic acids	144-62-7	3	17176	29063	11390	18520	17460	17892	13616	22254	15871	36439	45992	53364	17320	26474	26498	11288	15406	26015	39348	31041	39840	27220	28918	29764	36521	30463	C00209	ko00230,ko00630,ko01100
Lmgn000188	89.02	59.01	90.032	C3H6O3	[M-H]-	D-Lactic Acid	Organic acids	Organic acids	10326-41-7	3	7803.8	12335	8333.8	7043.8	7789.5	10955	5903.8	6371.5	9690.8	19002	12783	12358	7791	10169	7063.2	5538.5	1613	7554	6409.5	5841	8367	6179.5	5821.8	9167.5	12386	7178.5	C00256	ko00620,ko01100
pme2601	89	59	90.032	C3H6O3	[M-H]-	3-Hydroxypropanoic acid	Organic acids	Organic acids	503-66-2	3	71636	101270	71782	78929	87172	94250	72952	96283	87349	102470	90293	90668	58361	89173	67479	83283	55867	64211	61367	33801	59139	74003	67239	62747	60163	48603	C01013	ko00240,ko00410,ko00640,ko01100,ko01200
Lmlp001319	91.09	55.05	90.068	C4H10O2	[M+H]+	2,3-Butanediol	Others	Saccharides and Alcohols	513-85-9	3	9991.5	16120	24243	10871	3565.6	12077	6131.8	8799.3	12809	226720	139320	148320	14541	11279	6162.3	8459.7	8926.7	12178	26708	32218	21130	24528	38535	41048	36365	37959	C03044	ko00650
Lmqp000873	101.02	55.02	100.018	C4H4O3	[M+H]+	Succinic anhydride	Organic acids	Organic acids	108-30-5	3	1377500	1215800	1313600	881650	1011200	1053700	1128100	1176300	1121800	1037100	875670	1092300	908570	734090	1165200	854300	906090	1003400	1059900	1073900	1087100	1068500	1259500	1234500	1297400	1230300	C19524	--
MWSmce461	102.05	56.05	101.048	C4H7NO2	[M+H]+	L-Azetidine-2-carboxylic acid	Amino acids and derivatives	Amino acids and derivatives	2133-34-8	3	1245100	1468500	1348900	1238500	1122400	1234200	1133400	1065500	1247000	1469000	1368300	1440600	1485800	1533800	1360300	1614700	1979900	1663400	1024000	891870	934280	1032900	1122800	1032100	1146800	1027900	--	--
pmf0256	101.1	84.7	102.104	C6H14O	[M-H]-	3-Methyl-1-pentanol	Others	Saccharides and Alcohols	589-35-5	3	716060	891110	860270	3582500	3026000	4062700	490720	541820	728660	762710	983740	1545900	3003100	2876200	2229900	1102800	883670	1486900	1146700	1229000	1092100	1028500	982870	837140	966910	1033300	--	--
pme1841	103.12	86.1	102.116	C5H14N2	[M+H]+	Cadaverine	Alkaloids	Alkaloids	462-94-2	3	21148	26340	26346	24710	18958	26074	24465	27735	34308	27457	17693	21841	12753	15344	21359	25845	27557	18898	30000	28379	28730	23695	26237	32401	18173	29537	C01672	ko00310,ko00480,ko00960,ko01100,ko01110
pme3011	104.07	68.8	103.063	C4H9NO2	[M+H]+	γ-Aminobutyric acid	Organic acids	Organic acids	56-12-2	2	352420	334420	481380	212710	262200	320240	275220	252670	273360	476630	349270	407430	423100	225980	353210	369000	951650	447890	1157400	1388900	1873600	1725900	1397600	1196900	1303500	1213800	C00334	ko00250,ko00330,ko00410,ko00650,ko00760,ko01100
pme3017	104.07	58	103.063	C4H9NO2	[M+H]+	2-Aminoisobutyric acid	Organic acids	Organic acids	62-57-7	2	4864100	5512600	5366500	4016300	4537000	4843700	4898200	4183000	4945200	4958600	5801700	6520800	5674000	4954100	4969800	7753700	6758300	7563700	3884800	4216000	4733000	4640200	4627300	4135500	4446100	4508600	C03665	--
pme3033	104.07	86	103.063	C4H9NO2	[M+H]+	N,N-Dimethylglycine	Amino acids and derivatives	Amino acids and derivatives	1118-68-9	2	507240	566850	690460	400710	437100	402040	486950	471160	492990	688560	612610	766670	645100	384370	549930	759440	1050200	667900	970060	984950	1083200	1211200	1088900	1022400	1115100	1088000	C01026	ko00260,ko01100
ML10172161	103	59.01	104.011	C3H4O4	[M-H]-	Hydroxypyruvic acid*	Organic acids	Organic acids	1113-60-6	3	18509	22000	19976	25055	27009	26659	16421	10819	25450	17853	14174	33967	22532	28753	30445	28304	39592	46278	40296	60683	54770	57657	34786	64667	47970	45363	C00168	ko00260,ko00630,ko01100,ko01110,ko01200
Lmbn000193	103	59.01	104.011	C3H4O4	[M-H]-	Tartronate semialdehyde*	Organic acids	Organic acids	2480-77-5	3	21826	25484	10767	19556	15594	24253	18178	6712.2	27363	24351	7023.2	32419	16104	30381	29478	41670	40192	36493	59478	70781	60300	67770	59354	57412	49684	65839	C01146	ko00053,ko00630,ko01100
mws0576	103.04	59.1	104.047	C4H8O3	[M-H]-	3-Hydroxybutyric acid	Organic acids	Organic acids	300-85-6	2	96684	98768	161200	54130	72881	86016	114880	136380	91388	38909	104930	70759	87924	93767	53712	29959	10864	54547	179890	319310	282690	203170	272200	260270	296970	327710	C01089	ko00072,ko00650,ko01100
pme1975	103	59	104.06	C3H4O4	[M-H]-	Malonic acid	Organic acids	Organic acids	141-82-2	3	110170	126860	117760	143440	144070	138940	162160	128620	144530	135560	152250	160630	125660	166660	176880	211110	226290	268590	326150	334200	342320	381090	352790	364460	394130	329640	C00383	ko00061,ko00240,ko00410,ko01100,ko01212
pmb0484	104.1	60.1	104.107	C5H14NO+	[M]+	Choline	Alkaloids	Alkaloids	62-49-7	2	32556000	36202000	38779000	31556000	34206000	36867000	34401000	32199000	33269000	36685000	39591000	39353000	42655000	35073000	36646000	39424000	39069000	42522000	31149000	31064000	31076000	34699000	35081000	34435000	33420000	35251000	C00114	ko00260,ko00564,ko01100,ko02010
pme0010	106	60	105.043	C3H7NO3	[M+H]+	L-Serine	Amino acids and derivatives	Amino acids and derivatives	56-45-1	3	1502100	1507400	1844500	1335100	1872500	1657400	1628100	1703600	1795400	1755500	1325500	1835700	1464400	1411600	1498900	3721900	3097500	2977900	1848600	1624000	1798900	1628000	1959300	1972900	2143200	2124000	C00065	ko00260,ko00261,ko00270,ko00460,ko00600,ko00630,ko00920,ko00970,ko01100,ko01110,ko01200,ko01230,ko02010
mws0267	105.02	88	106.027	C3H6O4	[M-H]-	DL-Glyceric Acid	Organic acids	Organic acids	473-81-4	3	55459	72492	94043	108490	72796	80075	45982	84703	82045	89570	59729	65618	84051	127060	99614	57306	31536	60020	112890	77285	79612	59192	63756	83678	115030	90533	C00258	ko00030,ko00260,ko00561,ko00630,ko01100,ko01110,ko01200
MWS1776	109.06	65.04	108.058	C7H8O	[M+H]+	m-Cresol	Phenolic acids	Phenolic acids	108-39-4	3	16992	19709	19043	14292	17838	21872	17480	24147	17560	20300	13241	15527	12347	12507	14370	2109.8	5724.7	3475.2	13215	10999	20867	11443	15375	15100	11362	10850	C01467	--
mws1358	109.03	81	110.037	C6H6O2	[M-H]-	Pyrocatechol	Phenolic acids	Phenolic acids	120-80-9	2	6599.5	25318	11324	17870	10283	22618	12725	47293	22502	10857	4257.1	5170.6	8015.2	6584.3	22176	11809	5187.1	19848	20275	23035	25111	21308	24496	27283	18466	31898	C00090	ko01100
mws0601	110.02	66	111.032	C5H5NO2	[M-H]-	Pyrrole-2-carboxylic acid	Organic acids	Organic acids	634-97-9	3	6530	5887.2	11531	3760.6	9073.8	2924.3	6765.4	5943.6	2934.6	6530	11536	20919	12226	10310	2749.9	11893	11819	6975.5	12453	9107.2	16603	13054	3775.6	8263.5	9572.5	10109	C05942	ko00330
mws0255	112.05	95	111.043	C4H5N3O	[M+H]+	Cytosine	Nucleotides and derivatives	Nucleotides and derivatives	71-30-7	1	5147900	6470100	5408300	1700700	1613600	2302700	4984800	8014600	7303400	14772000	15636000	16814000	8741500	5425300	4246500	15954000	19912000	11150000	6061100	6334300	6581800	6678300	7169900	7633500	7705800	7606100	C00380	ko00240,ko01100
MWS5173	112.05	70.03	111.043	C4H5N3O	[M+H]+	Isocytosine	Nucleotides and derivatives	Nucleotides and derivatives	108-53-2	3	2681.2	7618.8	12721	14939	8367.9	6197	11045	11971	5393.2	7373.5	9901.5	11993	8208.3	9853.1	6476.3	74029	98075	91292	10742	16844	14332	22927	16513	14477	27569	20457	--	--
pme2122	112.09	95	111.08	C5H9N3	[M+H]+	Histamine	Alkaloids	Alkaloids	51-45-6	1	1192500	1195500	903650	371080	378650	478870	860660	1900900	1564600	3451500	3391300	3021500	1706200	1014300	563580	3972500	6344700	3524700	1741600	1660800	1574900	1686800	1759500	1823200	2023800	1825600	C00388	ko00340,ko01100,ko01110
pme0257	111.02	80	112.027	C4H4N2O2	[M-H]-	Uracil	Nucleotides and derivatives	Nucleotides and derivatives	66-22-8	3	155470	215920	194770	258790	189350	209140	163870	194690	188280	210350	162340	202780	160960	179470	168170	101750	113010	131650	215550	148510	178630	190070	231560	224950	267080	233460	C00106	ko00240,ko00410,ko00770,ko01100
MWS5172	113.06	68.99	114.068	C6H10O2	[M-H]-	2-Methyl-4-pentenoic Acid	Organic acids	Organic acids	1575-74-2	3	42787	36213	42779	60448	63409	55453	25004	41606	50399	40349	69672	43924	60430	74248	47167	62802	54672	61717	36591	35672	45586	38792	47518	32181	60322	47014	--	--
pme0006	116.07	70.1	115.063	C5H9NO2	[M+H]+	L-Proline	Amino acids and derivatives	Amino acids and derivatives	147-85-3	1	12463000	13005000	13309000	8373800	10559000	7861300	14719000	11841000	15220000	14266000	14461000	16457000	12468000	12078000	12207000	10380000	13800000	11241000	11131000	10896000	12186000	12170000	11075000	12694000	12707000	11949000	C00148	ko00330,ko00332,ko00970,ko01100,ko01110,ko01230,ko02010
mws0376	115	71	116.011	C4H4O4	[M-H]-	Fumaric acid	Organic acids	Organic acids	110-17-8	3	555790	709190	702100	448700	402290	726250	748190	435110	534420	810830	427100	861040	353160	533430	513780	531810	514700	806860	626920	1002600	830540	871950	699840	744140	897800	920460	C00122	ko00020,ko00190,ko00220,ko00250,ko00350,ko00360,ko00620,ko00650,ko00760,ko01100,ko01110,ko01200
pme3193	116.04	74	117.043	C4H7NO3	[M-H]-	N-Acetyl-L-glycine	Amino acids and derivatives	Amino acids and derivatives	543-24-8	3	27126	34942	33796	33188	36801	21987	52677	37761	41299	25556	31347	25989	23002	23833	29454	26260	43512	21457	31809	37418	50955	44897	34437	37948	49426	46907	--	--
pme0066	116.1	74	117.054	C3H7N3O2	[M-H]-	Guanidinoacetate	Alkaloids	Alkaloids	352-97-6	3	4937.5	6922.2	5166.7	4542.2	3581.3	4735.4	9211.8	8799.1	9462.3	6874.3	6376.4	7343.6	1729.7	3459.6	3876.4	3542.1	9370.3	2046.9	8418.3	7508.3	6683.2	8831	6879.2	7783.1	8386.2	7210.3	C00581	ko00260,ko00330,ko01100
pmb1096	118.07	91	117.058	C8H7N	[M+H]+	Indole	Alkaloids	Plumerane	120-72-9	1	9612.1	8117.5	6563	6469.6	10811	7359.2	6929.6	7602	5709.7	12784	8455.6	21698	9014	9549.8	5834.5	34059	39044	25842	14692	17295	14098	21197	29947	23203	25076	24558	C00463	ko00380,ko00400,ko00402,ko01100,ko01110
MWSmce548	118.09	58.07	117.079	C5H11NO2	[M+H]+	Betaine	Alkaloids	Alkaloids	107-43-7	1	6533200	8277300	7443800	8942300	6883300	7675100	9391900	12272000	8205300	6705300	7854600	9630600	4692200	7898300	7352900	11106000	10587000	11256000	10745000	9236000	9627300	8554100	9818200	10018000	10245000	10748000	C00719	ko00260,ko01100,ko02010
MWS5209	235.16	118.09	117.079	C5H11NO2	[2M+H]+	N-Methyl-α-aminoisobutyric acid	Amino acids and derivatives	Amino acids and derivatives	2566-34-9	1	24710000	28967000	37142000	43922000	23356000	28998000	40283000	44329000	34961000	33307000	29203000	35984000	14974000	30915000	25760000	44248000	42443000	48245000	50542000	46997000	47604000	52857000	48690000	40134000	58696000	44240000	--	--
mws0256	118.09	72.1	117.079	C5H11NO2	[M+H]+	L-Valine	Amino acids and derivatives	Amino acids and derivatives	72-18-4	2	7546100	8112000	7779700	6052200	6880200	6857600	8910000	11326000	9664300	11875000	9430500	11866000	6429700	7304100	6926900	12475000	16956000	12006000	9190700	9311200	9785300	10250000	9925100	10684000	10225000	10012000	C00183	ko00280,ko00290,ko00311,ko00460,ko00770,ko00966,ko00970,ko01100,ko01110,ko01210,ko01230,ko02010
pme0120	118.09	101	117.079	C5H11NO2	[M+H]+	5-Aminovaleric acid	Organic acids	Organic acids	660-88-8	3	30162	41681	29928	19054	22165	34692	26883	32806	19606	39157	36094	46733	31501	51454	25932	27335	41411	27060	43498	32041	45238	34263	42120	38347	41495	50777	C00431	ko00310,ko00330,ko01100
mws0470	117.02	73	118.027	C4H6O4	[M-H]-	Methylmalonic acid*	Organic acids	Organic acids	516-05-2	1	35295000	42925000	40850000	26407000	32018000	31557000	33736000	34610000	30993000	34474000	28673000	33504000	23862000	21957000	31949000	26529000	25704000	26858000	31071000	35986000	31891000	34741000	34304000	34526000	33451000	34566000	C02170	ko00240,ko00280,ko00640,ko01100
pme1730	117	59	118.027	C4H6O4	[M-H]-	D-Erythronolactone	Organic acids	Organic acids	15667-21-7	3	391750	494250	405710	453010	351910	510190	284820	414140	472390	677780	451890	659570	269900	508830	450330	336870	339030	423590	289710	210310	243430	251120	237040	269910	230960	211940	--	--
mws0192	117.02	73	118.027	C4H6O4	[M-H]-	Succinic acid*	Organic acids	Organic acids	110-15-6	1	39957000	44804000	39612000	29318000	29297000	33473000	31804000	39016000	34247000	33723000	32263000	36351000	23784000	24183000	35723000	27129000	30877000	17413000	33667000	36712000	34062000	35298000	38033000	37281000	34521000	35378000	C00042	ko00020,ko00190,ko00250,ko00310,ko00350,ko00360,ko00620,ko00630,ko00640,ko00650,ko00760,ko00920,ko01100,ko01110,ko01200
mws0147	117.06	59	118.063	C5H10O3	[M-H]-	β-Hydroxyisovaleric acid	Organic acids	Organic acids	625-08-1	1	301000	323860	336270	253000	310220	310270	323140	302260	301580	364950	346860	308490	471580	348230	351260	233750	341090	257540	296790	326220	315080	320610	315830	309220	298810	300090	C20827	ko00280,ko01100
pme3096	118	74	119.022	C3H5NO4	[M-H]-	Aminomalonic acid	Organic acids	Organic acids	1068-84-4	3	1763400	2199900	1806500	1207800	1156400	1436500	1591600	1708700	1503200	1428600	1443300	1568100	1081000	895960	1575100	1137500	1154800	1248200	1462700	1531100	1390000	1297600	1508000	1668400	1514600	1358800	C00872	--
mws0671	120.07	74.1	119.058	C4H9NO3	[M+H]+	L-Homoserine*	Amino acids and derivatives	Amino acids and derivatives	672-15-1	3	1335500	1538400	1440200	1341600	1375600	1400000	1375200	1556700	1581200	1898000	1572600	2047400	1593700	1349700	1478200	3979100	4157700	3403900	1681100	1651600	1779300	1872700	1795700	1781200	1595700	1679900	C00263	ko00260,ko00270,ko00300,ko00920,ko01100,ko01110,ko01230
mws0230	120.07	74	119.058	C4H9NO3	[M+H]+	L-Threonine*	Amino acids and derivatives	Amino acids and derivatives	72-19-5	3	1407200	1600500	1662200	1411900	1611100	1515800	1693000	1518800	1764400	1776200	1611000	2333300	1529200	1465200	1445200	3891700	4296400	3410500	1773900	1698000	1749800	1757200	1893700	1879200	1724800	1893100	C00188	ko00260,ko00261,ko00290,ko00860,ko00970,ko01100,ko01110,ko01230,ko02010
pmp001287	120.08	103.05	119.073	C8H9N	[M+H]+	N-Benzylmethylene isomethylamine	Alkaloids	Alkaloids	-	1	8694900	9262500	9386400	6805000	7374800	7310700	8494100	10979000	10393000	9950200	6838000	7846800	6062800	6588200	6553100	12124000	10995000	11398000	8171300	8426000	8172300	8725100	9256400	9755700	9668700	9922800	--	--
pma0134	121.04	93.06	120.042	C4H8O4	[M+H]+	D-Threose	Others	Saccharides and Alcohols	95-43-2	3	164840	192320	217180	268760	137690	243070	230580	230370	168590	126940	133920	177760	115900	112020	163230	227940	546590	161810	244100	214170	233600	291640	242070	245460	270310	288030	C06463	--
MWS4305	119.04	59.01	120.042	C4H8O4	[M-H]-	Erythrose	Others	Saccharides and Alcohols	583-50-6	3	14433000	15839000	17358000	18157000	17237000	16901000	16518000	15844000	19175000	17901000	16527000	17509000	20265000	18207000	18128000	20498000	19925000	18428000	16529000	18561000	17151000	16338000	14573000	14080000	15169000	15798000	C01796	--
Lmbn002644	119.05	93.03	120.058	C8H8O	[M-H]-	4-Methylbenzaldehyde	Others	Others	104-87-0	2	58768	103860	102180	55545	55992	88316	71926	78976	50101	79464	48429	115460	40463	32633	81466	53942	44324	35234	48124	49612	46629	51365	45073	62886	59234	48934	C06758	ko01100
pme0195	120.02	62	121.02	C3H7NO2S	[M-H]-	L-Cysteine	Amino acids and derivatives	Amino acids and derivatives	52-90-4	3	28346	26470	21678	31339	36984	15208	21106	7844.8	9307.5	19737	20069	28234	29698	21752	16198	19964	23216	8450.8	37765	36896	42734	33277	38431	28623	36356	38591	C00097	ko00260,ko00270,ko00311,ko00332,ko00430,ko00460,ko00480,ko00730,ko00770,ko00920,ko00970,ko01100,ko01110,ko01200,ko01230,ko04122
pmb0069	122	105	121.053	C7H7NO	[M+H]+	Benzamide	Phenolic acids	Phenolic acids	55-21-0	3	65753000	101740000	99269000	106710000	69883000	106080000	75095000	85479000	64731000	38671000	39073000	36398000	29237000	29961000	25254000	29453000	30043000	28172000	37989000	37858000	39289000	38853000	40492000	41654000	41477000	40273000	C09815	--
MWSslk106	122.1	105.07	121.089	C8H11N	[M+H]+	2-Phenylethylamine	Alkaloids	Benzylphenylethylamine alkaloids	64-04-0	1	69889000	105930000	93143000	111190000	67720000	112880000	73795000	94523000	67430000	41075000	41121000	39097000	30913000	31886000	26261000	31356000	31577000	29413000	38748000	40107000	40166000	40007000	41817000	43145000	40933000	43370000	C05332	ko00360,ko01100
mws0628	121.03	92	122.037	C7H6O2	[M-H]-	4-Hydroxybenzaldehyde	Phenolic acids	Phenolic acids	123-08-0	1	594900	881150	708700	625740	735790	804060	908720	724790	660530	700610	678360	783040	691940	815270	697850	715030	736250	867360	732730	775260	791680	751140	738670	764540	799300	770680	C00633	ko01100
Lmbn001930	121.03	77.04	122.037	C7H6O2	[M-H]-	2-Hydroxybenzaldehyde (Salicylaldehyde)	Phenolic acids	Phenolic acids	90-02-8	2	68599	57181	69108	69736	64991	72629	43258	35555	41844	48507	35110	44576	49303	50552	39943	36248	43280	51727	49183	49876	40281	40154	53790	42565	47725	27598	C06202	ko01100
pme0241	123.04	79	122.037	C7H6O2	[M+H]+	Benzoic acid	Phenolic acids	Phenolic acids	65-85-0	3	44668	32950	50158	74090	81908	45642	57741	67731	88338	45971	57013	93391	77264	41126	72814	39113	45660	39814	52957	66478	38818	32442	36998	58783	57322	66278	C00180	ko00360,ko01100,ko01110
mws0133	123.06	80.05	122.048	C6H6N2O	[M+H]+	Nicotinamide	Others	Vitamin	98-92-0	1	4950000	5924400	5868300	4162800	4231700	4842200	16362000	9089800	10571000	5286000	4774000	5968300	4714200	4614800	5536200	5070900	5572800	4777000	4746500	4904200	4946800	4931100	5341100	5599800	5671500	5678500	C00153	ko00760,ko01100
MWSmce207	123.05	81.04	122.048	C6H6N2O	[M+H]+	Acetylpyrazine	Others	Others	22047-25-2	3	23372	23597	11656	31745	21087	27154	28223	19630	19409	27449	29909	22703	24567	26261	19539	48671	43141	41980	18721	17446	15675	23037	33530	26592	27335	18375	--	--
pme2134	121	59	122.058	C4H10O4	[M-H]-	D-Threitol	Others	Saccharides and Alcohols	2418-52-2	3	1090400	982060	799370	1121700	1144000	1108200	962990	1017700	1128300	1131200	1309400	1152700	1072200	1281700	982910	1423700	1314500	1431500	1009400	1166800	1195200	838570	1070800	1095000	1021800	1207100	C16884	--
MWSmce039	124.04	84.05	123.032	C6H5NO2	[M+H]+	Isonicotinic acid	Others	Vitamin	55-22-1	3	5544.1	10241	13706	10442	10238	4005.4	8032.2	7020	14517	7492.9	10107	6980.3	11522	9234.9	5010.9	6492.2	3018	11510	11554	9558.3	11207	13136	14747	17004	24533	14710	C07446	--
pme0490	124.04	78	123.032	C6H5NO2	[M+H]+	Nicotinic acid (Vitamin B3)	Others	Vitamin	59-67-6	1	347800	349400	389760	346000	283970	333160	734630	557490	664340	344110	301900	404290	249610	261370	340050	434390	399500	456310	690840	734230	782450	849830	713500	742170	693970	689390	C00253	ko00760,ko00960,ko01100,ko01110
pme1216	122.03	78	123.032	C6H5NO2	[M-H]-	2-Picolinic acid	Organic acids	Organic acids	98-98-6	3	114020	119510	84363	69231	72641	92717	208540	167800	170910	101460	84482	125830	74770	105070	96126	144760	163700	117080	214530	266960	229120	225830	220250	232940	263970	234260	C10164	ko00380,ko01100
pmb0302	126.1	96	125.024	C2H8NO3P	[M+H]+	2-Aminoethylphosphonate	Lipids	Glycerol ester	2041-14-7	3	56648	55865	56018	56560	80378	63139	58540	61686	79429	70335	80056	81162	60449	70414	62215	106960	102480	91256	58094	54153	50897	59944	51696	49570	38595	57986	C03557	ko00440,ko01100,ko02010
pmp001086	127.04	97	126.032	C6H6O3	[M+H]+	5-Hydroxymethylfurfural	Others	Others	67-47-0	3	74698	78092	74785	128120	70653	91172	69053	80571	69057	56811	67218	63062	101670	56170	83649	32908	72265	114100	191050	199590	166240	93982	174150	142780	182730	203810	C11101	--
mws0251	127.05	110	126.043	C5H6N2O2	[M+H]+	Thymine	Nucleotides and derivatives	Nucleotides and derivatives	65-71-4	3	28755	93886	93543	33246	48429	70575	104220	64738	29250	73733	23569	101300	23778	31729	49253	14870	9787.4	24951	57192	57158	53477	56607	57697	48478	56153	57859	C00178	ko00240,ko01100
MWSmce448	127.05	81.04	126.043	C5H6N2O2	[M+H]+	Imidazol-1-yl-acetic acid*	Organic acids	Organic acids	22884-10-2	2	63712	100000	41868	44929	59074	33343	110420	62087	68849	83336	99047	78531	106800	63055	65977	82657	168800	125060	94159	99319	181110	126020	139990	145750	121540	91928	--	--
MWSmce118	127.05	81.04	126.043	C5H6N2O2	[M+H]+	Imidazole-4-Acetic Acid*	Organic acids	Organic acids	645-65-8	2	50435	32278	64065	83432	91419	46137	120450	68414	136570	88776	139190	83946	66236	59465	73279	113080	110260	131450	129060	103800	172430	115200	103560	121540	122150	127470	C02835	ko00340,ko01100
MWSmce709	130.06	103.05	129.058	C9H7N	[M+H]+	Isoquinoline	Alkaloids	Isoquinoline alkaloids	119-65-3	2	104050	121780	122110	98265	107580	110000	116450	56877	83641	104200	90135	58697	92465	99343	98089	8123.9	35080	20994	62212	39304	54720	65002	47011	50693	30715	45559	C06323	--
ML10181668	130.09	84.08	129.079	C6H11NO2	[M+H]+	Cycloleucine	Amino acids and derivatives	Amino acids and derivatives	52-52-8	1	7060200	7562900	8019800	4288900	6585500	5305000	9155300	10945000	10209000	7053900	7379800	14063000	3945400	3888300	4411000	16825000	33945000	13556000	9567600	9864800	9693300	9897400	9619200	9994300	9671600	9541900	C03969	--
MWS0811	130.09	84.08	129.079	C6H11NO2	[M+H]+	DL-Pipecolic Acid	Organic acids	Organic acids	3105-95-1	1	1566200	1530700	1916800	961280	983970	1003000	2181900	2547200	1919400	927910	910390	2424400	626060	498130	755560	1349000	5314400	1221400	1966800	2156200	2185900	2826600	2159900	2322400	2136200	2365800	C00408	ko00310,ko00960,ko01100,ko01110
Zmdp000376	130.09	84.08	129.09	C5H11N3O	[M+H]+	4-Guanidinobutanal	Others	Others	-	2	7642200	8799900	9940500	5845300	6218200	5192200	9937300	11771000	10229000	7856900	6853400	12700000	5134500	4171000	5609800	17957000	35200000	15564000	10271000	9390000	9858200	8575500	10409000	10552000	11003000	11177000	--	--
Zmgn000217	129.02	85.03	130.027	C5H6O4	[M-H]-	Methylenesuccinic acid	Organic acids	Organic acids	97-65-4	3	8874	11194	5874.8	3971.2	5174.5	10789	8837.2	7188.8	10558	8802.8	1022.8	11990	5935	10708	7938.5	8014.2	8187.2	5660	12425	14882	17375	26152	18335	14231	17440	15069	C00490	ko00660,ko01100
mws0425	129.02	85	130.027	C5H6O4	[M-H]-	Citraconic acid	Organic acids	Organic acids	498-23-7	3	43703	62412	61093	43549	40766	53688	22845	41926	36132	39597	14562	44527	28611	23464	42935	15111	5128.6	11498	76551	68134	52736	77684	56128	62362	53875	53018	C02226	ko00290,ko00660,ko01100,ko01210
pme2693	131.12	114.09	130.111	C6H14N2O	[M+H]+	N-Acetylputrescine	Alkaloids	Alkaloids	18233-70-0	3	12004	20943	8868.5	13284	6325.5	12214	18367	12033	14857	16251	13239	16252	7384.5	16306	13856	18975	16818	11848	28233	25378	26533	31864	27939	27046	27752	33153	C02714	ko00330,ko01100
pmf0470	132.07	73	131.058	C5H9NO3	[M+H]+	cis-4-Hydroxy-D-proline	Amino acids and derivatives	Amino acids and derivatives	2584-71-6	3	133110	124540	98312	112010	122890	106470	121030	125600	119110	163410	158050	169780	137460	116090	134580	224830	231630	194140	202890	88827	74544	102130	89055	160600	155460	150750	C03440	ko00330,ko01100
mws0216	132.07	86	131.058	C5H9NO3	[M+H]+	Trans-4-Hydroxy-L-proline	Amino acids and derivatives	Amino acids and derivatives	51-35-4	2	18290000	17969000	20419000	16798000	15197000	17613000	22072000	22737000	23065000	33107000	22679000	30268000	16970000	18804000	18994000	60844000	65520000	56020000	30407000	27113000	29257000	28721000	30916000	32454000	32085000	31833000	C01157	ko00330,ko01100,ko02010
MWS2413	130.05	58.03	131.058	C5H9NO3	[M-H]-	N-acetyl-beta-alanine	Amino acids and derivatives	Amino acids and derivatives	3025-95-4	3	9761.5	8580.8	6343.5	7206.1	11095	10063	9074.2	2688.9	10068	5232.8	9758.9	8666.8	14692	11642	10707	10602	10760	12140	14172	11867	12422	21237	17150	18744	17314	13505	C01073	ko00410
Zmpn000638	130.05	88.04	131.069	C4H9N3O2	[M-H]-	3-Guanidinopropionic acid	Organic acids	Organic acids	353-09-3	3	74504	59227	75230	66255	66210	60641	99047	96426	83566	60375	67650	64291	59073	54712	54035	65754	72170	81092	95958	81190	112390	130980	118260	104380	104070	99770	C03065	--
pmp001198	132.1	57.1	131.095	C6H13NO2	[M+H]+	6-Deoxyfagomine	Alkaloids	Piperidine alkaloids	197449-09-5	1	3130600	3056300	3335300	3079300	3532200	3207300	4192100	5371800	3929800	5626800	4140000	6129300	3412000	3376100	3683700	11472000	10062000	9359000	5154800	6054700	5884500	7354300	5488800	5674300	5523300	5872500	--	--
mws0227	132.1	86.2	131.095	C6H13NO2	[M+H]+	L-Leucine*	Amino acids and derivatives	Amino acids and derivatives	61-90-5	1	554140	599440	608570	527330	642690	607410	702720	963320	697520	993470	740460	1081300	605710	658080	627050	2211100	1782600	1697300	985430	1007300	1063400	1304800	961070	871040	964620	1017000	C00123	ko00280,ko00290,ko00966,ko00970,ko01100,ko01110,ko01210,ko01230,ko02010
pme0274	132.1	69	131.095	C6H13NO2	[M+H]+	6-Aminocaproic acid	Organic acids	Organic acids	60-32-2	2	387010	417240	424280	389020	365290	397230	508310	656410	499080	751830	541160	782440	412960	420430	475550	1589200	1501800	1204300	694470	618700	602110	688030	630720	692460	673160	698010	C02378	ko01100
mws0258	132.1	86	131.095	C6H13NO2	[M+H]+	L-Isoleucine*	Amino acids and derivatives	Amino acids and derivatives	73-32-5	1	255940	224660	262490	196160	224470	250050	279760	237950	357080	300540	271660	263040	239600	223280	178340	498070	638740	476880	270250	368330	302490	271840	342610	301100	338350	327030	C00407	ko00280,ko00290,ko00460,ko00960,ko00966,ko00970,ko01100,ko01110,ko01210,ko01230,ko02010
mws1587	132.1	86	131.095	C6H13NO2	[M+H]+	L-Norleucine	Amino acids and derivatives	Amino acids and derivatives	327-57-1	1	262370	247000	274260	224060	212220	247450	301170	305990	326450	351400	268900	277450	225410	233630	188300	529500	637660	475590	313430	273580	354660	257380	334650	325720	331840	279820	C01933	--
mws1167	131	59.2	132.006	C4H4O5	[M-H]-	Oxaloacetic acid	Organic acids	Organic acids	328-42-7	3	48980	30992	58792	53358	48076	62318	12767	58775	70336	219020	229080	260490	95001	129250	96856	252720	255560	175760	156400	158640	168500	153700	187060	159630	185910	184680	C00036	ko00010,ko00020,ko00250,ko00620,ko00630,ko00710,ko01100,ko01110,ko01200,ko01210,ko01230
Lmmn002164	131.03	87.05	132.042	C5H8O4	[M-H]-	Monomethyl succinate*	Organic acids	Organic acids	3878-55-5	1	89629	93736	100820	64280	89918	88121	98892	90168	106540	112560	96184	81809	108980	68972	72309	98916	83587	82812	72884	93928	94187	84219	84372	91590	91559	86377	--	--
Lmbn001288	131.03	87.04	132.042	C5H8O4	[M-H]-	2-Hydroxy-2-methyl-3-oxobutanoic acid	Organic acids	Organic acids	71698-08-3	1	54822	57553	58895	48610	75487	62973	70044	64989	63902	60858	76179	57029	74231	51260	54576	60750	73592	58016	56024	61868	58156	62619	73548	68269	59421	48286	C06010	ko00290,ko00650,ko00660,ko00770,ko01100,ko01110,ko01210,ko01230
mws0473	131.03	87.05	132.042	C5H8O4	[M-H]-	2-Methylsuccinic acid*	Organic acids	Organic acids	498-21-5	1	808930	826780	956640	707680	899420	926720	962570	891560	847830	932900	985730	787270	961990	686140	671770	840670	902520	802760	847200	852900	883330	867030	852230	890790	883180	886300	--	--
Lmmn000806	131.03	87.05	132.042	C5H8O4	[M-H]-	Dimethylmalonic acid*	Organic acids	Organic acids	595-46-0	1	81062	86002	88973	81902	103370	89865	99738	83936	86173	83459	93522	82669	88535	69729	64197	75933	82821	83706	86861	80030	90265	87599	94514	96930	97247	78373	--	--
pme0243	131.03	87.05	132.042	C5H8O4	[M-H]-	Glutaric acid	Organic acids	Organic acids	110-94-1	3	236680	225030	209640	193550	309170	148880	287900	226680	282890	242910	222940	186550	321190	129730	178310	203080	242430	290940	838380	856190	820250	911670	873140	900320	893920	867650	C00489	ko00071,ko00310,ko01100
pme3034	131.03	69.03	132.042	C5H8O4	[M-H]-	Ethylmalonic acid	Organic acids	Organic acids	601-75-2	3	1144	7420.3	3085.7	867.64	12465	4674.2	1444.4	1083.8	2745.3	667.21	1873.8	5619.7	602.79	881	5721.8	1227.4	6216.4	3544.6	38113	34549	27805	38509	29969	27595	25283	29087	--	--
Lmgn000160	131.05	70.03	132.053	C4H8N2O3	[M-H]-	3-Ureidopropionic Acid	Organic acids	Organic acids	462-88-4	1	7506	6813.8	10241	6229.2	4004	10276	8022.2	14192	16668	12018	10786	13215	7945	5108.2	3421.5	100410	125220	87206	14276	13008	17158	7378.2	13035	14284	17719	21334	C02642	ko00240,ko00410,ko00770,ko01100
mws0972	131.07	85	132.079	C6H12O3	[M-H]-	6-Hydroxyhexanoic acid	Organic acids	Organic acids	1191-25-9	1	2349000	2265800	2096900	2184500	2193700	1998100	3307000	1245100	1989700	1653600	1952800	2902000	1880700	1461800	1133900	377310	287790	236180	1280200	1302000	1299200	1289200	1414100	1283000	1267800	1320600	C06103	--
Lmrn002746	131.07	85.07	132.079	C6H12O3	[M-H]-	2-Hydroxy-4-methylpentanoic acid	Organic acids	Organic acids	498-36-2	1	13364	23025	14028	14832	7149.8	21291	20098	25134	40710	154120	143990	154340	148420	129790	143560	226520	190540	196820	82964	102240	95925	106150	120510	110570	127450	119980	--	--
mws0341	131.07	85	132.079	C6H12O3	[M-H]-	2-Hydroxyisocaproic acid	Organic acids	Organic acids	20312-37-2	1	55289	31106	67464	44894	34521	45968	58308	49796	67866	111390	71716	89523	93487	71031	85454	72870	108740	96229	160560	108600	139890	137670	155300	162730	168520	166800	C03264	--
pme2527	133	116	132.09	C5H12N2O2	[M+H]+	L-Ornithine	Amino acids and derivatives	Amino acids and derivatives	70-26-8	3	25111	43657	41553	20015	27844	26947	63175	70397	58437	81003	38888	55842	26568	13321	17981	266650	253540	234080	54387	50372	49451	41173	50254	48086	51323	49575	C00077	ko00220,ko00330,ko00472,ko00480,ko01100,ko01110,ko01210,ko01230,ko02010
mws0219	132.03	88	133.038	C4H7NO4	[M-H]-	L-Aspartic Acid	Amino acids and derivatives	Amino acids and derivatives	56-84-8	1	10263000	12458000	11832000	9764900	12663000	10238000	13238000	11687000	11433000	10463000	12581000	8473200	9827100	10278000	10831000	10183000	13956000	9414200	8154200	8648900	7727800	8057200	8498400	8830900	8386700	9113600	C00049	ko00220,ko00250,ko00260,ko00261,ko00270,ko00300,ko00340,ko00410,ko00460,ko00710,ko00760,ko00770,ko00970,ko01100,ko01110,ko01200,ko01210,ko01230,ko02010
MWS1882	132.03	88.04	133.038	C4H7NO4	[M-H]-	Iminodiacetic acid	Organic acids	Organic acids	142-73-4	1	1427600	1486000	1618600	1181400	1596100	1445800	1784200	1584900	1631500	1191800	1411800	1059400	1264100	1190300	1513700	1327300	1760600	1211500	1058500	1110100	939580	1030300	1008100	1028800	923790	1082200	C19911	--
Lmbn000198	133.01	71.01	134.022	C4H6O5	[M-H]-	3-Dehydro-L-Threonic Acid*	Organic acids	Organic acids	-	1	6670200	7291800	6982400	7393000	7861100	5628600	7966100	6013900	8808100	7720600	7846100	6059200	8031300	7868700	12491000	9323300	11278000	13608000	14328000	14315000	15550000	15892000	14991000	14804000	15794000	15170000	C03064	ko00053,ko01100
mws0275	133.01	71.01	134.022	C4H6O5	[M-H]-	L-Malic acid*	Organic acids	Organic acids	97-67-6	1	1990900	1980200	1682200	1594600	2012200	1811500	2244800	1704400	2416100	1583100	2020400	1734500	2242600	2239000	3182900	2234600	2638300	3429600	3987000	3970700	4461000	4270600	4489400	3911900	4145700	4056800	C00149	ko00020,ko00620,ko00630,ko00710,ko01100,ko01110,ko01200
MWSmce701	135.08	79.05	134.073	C9H10O	[M+H]+	4-Ethylbenzaldehyde	Others	Others	4748-78-1	3	41525	35385	34535	33847	32723	45778	35342	33301	30120	39953	37461	29396	42655	40914	33453	37563	40315	45195	21109	15892	19589	17188	20292	22765	21113	20540	--	--
Zmdp000972	136.04	91.05	135.035	C4H9NO2S	[M+H]+	S-Methyl-L-cysteine	Amino acids and derivatives	Amino acids and derivatives	1187-84-4	2	1065400	977020	1037700	850550	885400	840750	1153600	1398200	1130700	1270600	1009700	1271700	828530	901170	925050	2417700	2414100	2057700	1191000	1156300	1265500	1379300	1235300	1193600	1337800	1203700	C22040	ko02010
pme0040	136.06	119	135.054	C5H5N5	[M+H]+	Adenine	Nucleotides and derivatives	Nucleotides and derivatives	73-24-5	1	10487000	13432000	10601000	8490600	6055500	8595800	9263900	9788400	30018000	43319000	45948000	59831000	20221000	35878000	19795000	92531000	84372000	78303000	38604000	39858000	40656000	42223000	40105000	40459000	35430000	41016000	C00147	ko00230,ko00908,ko01100
pmb0374	136.06	118.9	135.054	C5H5N5	[M+H]+	2-Aminopurine	Nucleotides and derivatives	Nucleotides and derivatives	452-06-2	1	2500200	2757900	2722700	2302700	1872700	2524200	2925900	2935800	2625400	1919000	2526800	2366200	1912000	2124800	2167100	686520	1541400	1266400	1773600	1656600	1741200	1644800	1807500	1879300	1873600	1791600	--	--
MWSmce556	136.08	91.06	135.068	C8H9NO	[M+H]+	2'-Aminoacetophenone	Others	Others	551-93-9	3	17639	7966.6	16675	9640.6	13488	16038	13126	12409	7145.1	9085.9	7979.4	17401	12489	12214	4990.6	10677	7135	10397	14148	16303	14297	10985	7702.6	12938	9730.8	13203	--	--
Lmgp000659	136.08	91.05	135.068	C8H9NO	[M+H]+	2-Phenylacetamide*	Alkaloids	Alkaloids	103-81-1	3	1389700	1288500	1368500	1166800	1329700	1195900	1517000	1781800	1543100	1821200	1309700	1831700	1094900	1184900	1241100	3235700	2975500	2552200	1663900	1591000	1578600	1997300	1537300	1602800	1681600	1721700	C02505	ko00360,ko01100
HJKP000649	136.07	91.05	135.068	C8H9NO	[M+H]+	N-benzylformamide*	Alkaloids	Alkaloids	6343-54-0	2	1230200	1052800	1070600	964100	1049200	1022200	1295800	1564900	1216800	1629200	1222100	1482800	941960	1039700	1037300	2818700	2631600	2392400	1407800	1455500	1434000	1676300	1379500	1333900	1440700	1558200	C15561	--
mws0889	135.03	75.01	136.037	C4H8O5	[M-H]-	D-Threonic Acid	Others	Saccharides and Alcohols	3909-12-4	1	2157600	2830800	2547300	2443300	2027100	2751500	2487700	3110800	3051200	3216500	3795900	3545900	2415000	2632600	2319700	2125700	2915500	3178200	2557800	2564700	2412800	2580000	2746400	2891500	2594800	2891800	C21649	--
pme0033	137.05	119	136.039	C5H4N4O	[M+H]+	Hypoxanthine	Nucleotides and derivatives	Nucleotides and derivatives	68-94-0	3	68146	69432	71722	54488	49852	55710	67455	103290	166400	222640	223460	324580	92266	173080	108000	803250	567070	533350	302120	329250	320530	354970	328030	314170	355710	330300	C00262	ko00230,ko01100
Zmyn002919	135.04	91.05	136.052	C8H8O2	[M-H]-	2-Methylbenzoic acid	Phenolic acids	Phenolic acids	118-90-1	3	7063.2	7137.1	7757.4	7290	7151	7974.6	9862.5	10650	3866.5	17592	12538	12682	9787.9	11483	7789.8	10910	11094	5756.8	5143.7	4657.8	6767.7	4888.3	6142.3	8775.6	5437.7	4892.6	C07215	ko01100
MWSmce466	135.05	92.03	136.052	C8H8O2	[M-H]-	4'-Hydroxyacetophenone	Phenolic acids	Phenolic acids	99-93-4	3	24009	45391	33690	18871	39504	37872	29896	40694	46496	33781	38264	40660	66818	108530	148420	35116	20879	21485	53274	61331	43390	50800	57308	62834	58798	59914	C10700	ko01100
pme2268	138.06	94.07	137.048	C7H7NO2	[M+H]+	Trigonelline	Alkaloids	Pyridine alkaloids	535-83-1	1	20914000	20645000	22930000	23471000	21615000	23723000	24781000	22059000	20397000	20355000	22696000	19632000	24388000	15715000	19345000	20063000	22315000	20200000	15895000	17669000	17414000	18356000	17468000	16512000	16347000	16646000	C01004	ko00760
mws1336	138.06	120	137.048	C7H7NO2	[M+H]+	4-Aminobenzoic acid	Phenolic acids	Phenolic acids	150-13-0	2	149340	102060	128160	54876	53290	36773	180650	195150	157360	156890	206820	198680	2218.5	95881	78486	251320	242280	204090	82152	82335	93557	83034	95213	2801.9	105920	107830	C00568	ko00790,ko01100
mws1078	138.06	92.1	137.048	C7H7NO2	[M+H]+	Anthranilic Acid	Phenolic acids	Phenolic acids	118-92-3	3	1424600	1515100	1753200	1127700	1188700	1248300	1145400	1296100	1390200	898950	1013500	897620	876110	1058200	942140	573490	559930	483040	695590	742820	696070	714020	802270	752680	778420	721590	C00108	ko00380,ko00400,ko00998,ko01058,ko01100,ko01110,ko01230
mws0146	138.06	78	137.048	C7H7NO2	[M+H]+	Nicotinic Acid Methyl Ester(Methyl Nicotinate)	Alkaloids	Pyridine alkaloids	93-60-7	3	94690	127300	74946	129420	116690	120500	114760	99330	122110	109470	103400	161910	62753	136050	169650	243350	319060	205280	206420	214370	216500	248150	265760	257360	249500	241150	--	--
pme1002	138.09	103	137.084	C8H11NO	[M+H]+	L-Tyramine	Amino acids and derivatives	Amino acids and derivatives	51-67-2	1	4607900	6733500	5882500	7510000	4406700	7247200	5390900	6641800	4135700	2539400	2387500	4394600	2392800	2074900	3224200	7032400	17888000	5221300	5790400	5975500	6414100	6651500	6051400	6193100	6141400	6454500	C00483	ko00350,ko00950,ko01100,ko01110
pma0948	138.09	121.1	137.084	C8H11NO	[M+H]+	Phenylethanolamine	Alkaloids	Alkaloids	7568-93-6	3	1191900	1816500	1703100	1991200	1193500	2008500	1506100	1731800	1208000	717690	788250	1340200	682660	678930	892950	2239000	5016400	1550600	1745800	1702000	1802900	1888200	1760900	1817400	1741200	1734500	C02735	--
Hmgn001653	137.02	93.04	138.032	C7H6O3	[M-H]-	Protocatechualdehyde*	Phenolic acids	Phenolic acids	139-85-5	2	1505500	2693500	2224100	1604600	1764800	1968400	1727700	1924300	2596300	1408000	1629400	1729800	1475600	1706100	1605600	3443500	3187000	2868200	2137300	1899700	1966300	1882100	2005000	2006900	2168100	1876700	C16700	ko00950
MWSCX016	139.04	77.04	138.032	C7H6O3	[M+H]+	p-hydroxybenzoic acid	Phenolic acids	Phenolic acids	99-96-7	3	137360	199080	204030	127460	169980	174050	167270	162550	159040	111250	113140	124380	125310	112220	106040	280670	190750	207730	153830	162290	156580	157000	178150	162210	152570	176090	C00156	ko00130,ko00790,ko01100,ko01110
Lmgn001670	137.03	108.02	138.032	C7H6O3	[M-H]-	Salicylic acid	Phenolic acids	Phenolic acids	69-72-7	1	106980	129810	118150	116240	98035	156610	130360	88622	105180	108770	103390	114980	105720	107050	128350	133010	103540	145550	102750	79036	109150	99964	99041	130020	104290	123220	C00805	ko00360,ko01100,ko01110,ko04075
Lmbn001981	137.02	93.03	138.032	C7H6O3	[M-H]-	2,5-Dihydroxybenzaldehyde*	Phenolic acids	Phenolic acids	1194-98-5	2	1086100	2088800	1706400	1410500	1363000	1640500	1111100	1544500	1829400	1166200	1276600	1274300	970160	1266300	1078700	2927700	2777500	2117500	1419600	1516900	1285100	1526300	1556000	1391900	1334400	1517300	C05585	ko00350,ko01100
mws0336	137.04	93.05	138.043	C6H6N2O2	[M-H]-	Urocanic acid	Organic acids	Organic acids	104-98-3	3	157380	188180	127560	184220	162240	130200	142320	131060	164130	99487	183660	151500	114710	148340	143220	181430	195270	141090	160550	186040	159490	111440	122060	170610	181060	133420	C00785	ko00340,ko01100
MWS1850	139.08	56.96	138.068	C8H10O2	[M+H]+	2-Phenoxyethanol	Phenolic acids	Phenolic acids	122-99-6	3	41213	30440	34115	12967	17226	23004	22696	17218	26334	39913	38265	41352	27685	47359	68843	49835	39981	49176	44292	62847	35652	51370	43551	49795	43131	33140	--	--
mws2368	137.06	119.05	138.068	C8H10O2	[M-H]-	Tyrosol	Phenolic acids	Phenolic acids	501-94-0	2	14578	16388	14174	13174	14115	13200	10508	11918	16949	6630.5	13141	15874	6631.6	16737	17274	16393	2733.3	18327	7274.6	10466	15045	14959	13192	9344.7	7362.6	15004	C06044	ko00350,ko01100
pme1137	140.03	94	139.027	C6H5NO3	[M+H]+	6-Hydroxynicotinic acid	Alkaloids	Pyridine alkaloids	5006-66-6	3	90960	100840	135440	100520	96880	114530	127590	141580	124610	131850	107360	148290	115260	97504	109880	121990	200040	113360	129980	149360	101650	128530	116590	114790	118610	124260	C01020	ko00760,ko01100
pme2828	140	99	139.027	C6H5NO3	[M+H]+	4-Nitrophenol	Phenolic acids	Phenolic acids	100-02-7	3	22613000	23821000	21271000	22107000	19753000	23244000	17763000	24107000	18015000	21096000	9507400	19230000	24463000	19330000	26633000	22416000	18415000	22053000	23188000	26812000	25648000	19810000	21180000	16069000	16473000	20561000	C00870	--
MWSmce585	104.07	59.01	139.04	C4H9NO2	[M-Cl]+	Methyl 3-aminopropanoate	Amino acids and derivatives	Amino acids and derivatives	3196-73-4	2	4285400	4363100	4995100	3643200	4035800	3915500	4352400	4099800	4397700	4575400	5295300	5966300	5377800	4589000	4328600	7041100	6025500	6532400	3387800	3843100	4073100	4256300	4244900	3960600	3744000	4103400	--	--
mws0704	140.01	78.96	141.019	C2H8NO4P	[M-H]-	O-Phosphorylethanolamine	Alkaloids	Alkaloids	1071-23-4	3	32163	25812	30910	19075	35665	16654	20947	19817	32284	46965	41760	28216	71551	58029	60124	1740.8	1740	3196.8	38489	31237	26618	37668	36933	34711	36423	34435	C00346	ko00564,ko00600,ko01100
pma2987	142.1	124.09	141.09	C6H11N3O	[M+H]+	Histidinol	Alkaloids	Alkaloids	501-28-0	3	3102800	2800800	2875100	3064700	3083000	2542900	4026200	3229300	3636600	3290700	3199200	2647400	2886500	1990300	2848300	2787700	3311400	2981700	4700300	4993700	4755100	4969000	5149100	5296200	5085300	5259300	C00860	ko00340,ko01100,ko01110,ko01230
pme3207	141.02	59	142.027	C6H6O4	[M-H]-	Muconic acid	Organic acids	Organic acids	1119-72-8	1	1488300	1764000	1776300	1768700	1611700	1490700	1511900	1586200	1523700	1812400	1931200	2058300	1642300	1845200	1567000	1999400	1839600	1601700	2626000	2344400	2143700	2634000	2288000	2511400	2555200	1983400	C02480	ko01100
pmb0764	144.05	113.2	143.04	C6H9NOS	[M+H]+	4-Methyl-5-thiazoleethanol	Others	Others	137-00-8	3	35744	62509	49044	34408	28408	60864	46460	43451	25267	70259	28838	86054	29723	29167	44985	29898	39088	29438	67626	68566	69694	70469	91720	79322	76067	72466	C04294	ko00730,ko01100
Rfmb320	144.1	84.08	143.095	C7H13NO2	[M+H]+	1-Methylpiperidine-2-carboxylic acid	Organic acids	Organic acids	7730-87-2	3	406660	361390	438500	310310	339560	296470	342840	235580	294010	246460	333790	268280	348370	303810	280040	283660	456150	501840	264560	249920	287440	257920	262540	318240	264820	298020	--	--
Hmsp000364	144.1	98.09	143.095	C7H13NO2	[M+H]+	L-Cyclopentylglycine	Amino acids and derivatives	Amino acids and derivatives	2521-84-8	3	22882	18312	46974	35662	42591	46638	52916	43069	22361	18555	34290	9911.5	36343	16096	34332	30370	19696	25617	28965	30137	27777	33106	24556	39468	57109	44784	--	--
MWS1875	143.05	115.05	144.058	C10H8O	[M-H]-	2-Naphthol	Phenolic acids	Phenolic acids	135-19-3	3	15427	13179	15040	19287	16204	16602	13639	15203	16435	22037	20315	17088	24849	20151	18349	14787	14627	16475	13313	10478	14298	13382	13821	13220	15252	12554	C11713	--
MWS2066	143.05	115.06	144.058	C10H8O	[M-H]-	1-Naphthol	Phenolic acids	Phenolic acids	90-15-3	3	13037	9818.1	13613	19288	15256	15712	12580	13532	14963	21940	16591	13502	18932	17083	15862	11453	13948	11991	12140	11329	11811	10983	10428	8349.7	9543.3	9399.1	C11714	--
mws0851	143.11	143.11	144.115	C8H16O2	[M-H]-	Valproic Acid	Organic acids	Organic acids	99-66-1	1	1967700	1963800	2142300	2051800	1915800	1909500	1611800	1617400	1716000	1952700	1778000	1613000	2402700	1989800	1748600	1669800	1338400	1411000	1578000	1566200	1589500	1698900	1627300	1595200	1730900	1547700	--	--
mws0103	146.06	91	145.053	C9H7NO	[M+H]+	Indole-3-carboxaldehyde	Alkaloids	Plumerane	487-89-8	3	145370	197840	153030	167730	163390	200050	161250	254150	172710	175610	138540	159380	182840	146310	188000	145360	144090	164440	272610	275100	260590	258740	265630	254900	254350	258650	C08493	--
Lmqp000427	146.08	82.07	145.074	C6H11NO3	[M+H]+	N-Methyl-Trans-4-Hydroxy-L-Proline	Amino acids and derivatives	Amino acids and derivatives	4252-82-8	3	15929	29852	14921	29631	25123	19955	25207	30647	27084	30335	29758	19490	21791	12413	25427	21848	23058	42553	25339	24449	33712	18992	27066	34969	35216	30914	--	--
pme0295	146.08	86	145.074	C6H11NO3	[M+H]+	4-Acetamidobutyric acid	Organic acids	Organic acids	3025-96-5	3	66538	62176	90329	54761	52664	57058	59523	77026	99730	65500	79016	94473	92499	49417	90686	31502	32484	50410	198790	180260	190040	186000	205330	209670	204290	228690	C02946	ko00330,ko01100
mws0567	146.09	87	145.085	C5H11N3O2	[M+H]+	4-Guanidinobutyric acid	Organic acids	Organic acids	463-00-3	3	186050	204160	194590	168900	153350	184730	172340	185960	210460	204160	212640	285210	189710	167910	191430	271830	302020	285710	231010	198660	221950	202040	239440	220230	235990	218850	C01035	ko00330,ko01100
mws0017	146.17	72.2	145.158	C7H19N3	[M+H]+	Spermidine	Alkaloids	Alkaloids	124-20-9	3	16067	15648	21828	8760.4	9273.1	13018	20088	18551	14591	10655	9593.3	7662.9	13812	13227	9580.2	9188.1	7594.5	8699.8	5899.4	10480	9534.6	4732.9	5527.7	7540.6	6897.3	5724.9	C00315	ko00330,ko00410,ko00480,ko00940,ko01100,ko02010
Lmgn000224	145.01	57.03	146.022	C5H6O5	[M-H]-	2-Methyl-3-oxosuccinic acid	Organic acids	Organic acids	-	3	17611	16704	16961	16009	11704	22896	20341	13436	5817	11803	8316.8	12188	19481	22616	12874	17436	19626	10460	5104.5	11118	6409.5	14575	6819.5	5074.5	14595	9094.8	C06030	ko00660
pme2380	145.01	101	146.022	C5H6O5	[M-H]-	α-Ketoglutaric acid	Organic acids	Organic acids	328-50-7	3	110620	139220	136050	144500	140360	114380	116320	91684	76937	51092	70958	48994	140650	116760	94898	98790	59890	74126	101880	102490	108190	102340	86180	68390	99035	72558	C00026	ko00020,ko00040,ko00053,ko00220,ko00250,ko00300,ko00310,ko00340,ko00430,ko00630,ko00650,ko00660,ko01100,ko01110,ko01200,ko01210,ko01230
mws1012	147.04	103	146.037	C9H6O2	[M+H]+	Coumarin	Lignans and Coumarins	Coumarins	91-64-5	2	24048	17748	19788	31635	25848	25112	16384	22545	22039	19992	16633	13997	20774	26764	17256	11496	10870	13318	12189	16832	14824	11492	21078	13294	14531	18177	C05851	ko00940,ko01110
mws0924	145.05	101	146.058	C6H10O4	[M-H]-	2-Methylglutaric acid*	Organic acids	Organic acids	617-62-9	2	396410	493030	504050	401420	433940	476420	511810	611210	519170	469710	374580	559260	420630	320200	435250	361250	311390	255430	590010	612650	584430	614430	587050	581220	546360	623160	--	--
mws0208	145.05	101	146.058	C6H10O4	[M-H]-	Adipic Acid*	Organic acids	Organic acids	124-04-9	2	451760	540600	497830	467450	414120	471410	589520	559890	640490	576810	483470	603250	447480	372070	384860	308300	279390	264890	661750	665780	722460	647090	687800	667520	657200	690990	C06104	ko01100
MWS5136	145.05	101.06	146.058	C6H10O4	[M-H]-	Mono-Methyl Glutarate	Organic acids	Organic acids	1501-27-5	3	21196	15031	38928	23625	24093	28547	17879	16289	16649	19283	26139	18702	32412	34619	23258	11300	15685	18493	17384	17494	19094	14205	17672	12579	18506	14446	--	--
Wmzn000227	145.06	109.04	146.058	C6H10O4	[M-H]-	2,2-Dimethylsuccinic acid	Organic acids	Organic acids	597-43-3	1	12855	27134	24647	22486	26320	18425	13584	64416	26957	62480	51450	96003	14354	22905	14898	293180	389820	210420	45373	55274	46596	58159	41648	60548	52892	37580	--	--
Lmbn001676	145.05	101.06	146.058	C6H10O4	[M-H]-	3-Hydroxy-3-Methyl-2-Oxopentanoic Acid	Organic acids	Organic acids	-	3	17036	22068	23124	21675	14192	22523	17598	12626	20988	19959	21793	26147	25926	16775	15371	8713.2	13521	11976	12697	14208	12555	19604	9156.4	7316.8	21943	7564.2	C14463	ko00290,ko01110,ko01210
Lmbn001609	145.05	83.05	146.058	C6H10O4	[M-H]-	2-Acetyl-2-Hydroxybutanoic Acid	Organic acids	Organic acids	-	3	34212	61384	57622	46048	38561	51722	61931	56381	72426	52555	41765	69737	45638	50670	48838	36197	32389	34022	72020	68288	74262	76605	77519	80445	75557	83333	C06006	ko00290,ko01100,ko01110,ko01210,ko01230
pme0193	147.08	84	146.069	C5H10N2O3	[M+H]+	L-Glutamine	Amino acids and derivatives	Amino acids and derivatives	56-85-9	1	4899000	4839400	5549100	4181700	5282800	4582500	7160500	5909600	4325900	8541600	5375700	5042100	4658800	4566000	4454300	15961000	18372000	12542000	6182800	6519200	7065000	5679900	6391900	5569200	4736900	5422400	C00064	ko00220,ko00230,ko00240,ko00250,ko00630,ko00750,ko00910,ko00970,ko01100,ko01230,ko02010
pme0026	147.11	84	146.106	C6H14N2O2	[M+H]+	L-Lysine	Amino acids and derivatives	Amino acids and derivatives	56-87-1	1	5750300	5439400	6383600	5042900	6250300	5260600	7857800	7050900	5482500	9714700	7047800	6298200	5451000	5199800	5287400	18789000	22881000	15057000	6981900	7215100	7507100	7120700	7522300	6691700	5275100	6854300	C00047	ko00300,ko00310,ko00780,ko00960,ko00970,ko01100,ko01110,ko01210,ko01230,ko02010
Zmzn000113	146.05	102.06	147.053	C5H9NO4	[M-H]-	L-threo-3-Methylaspartate	Amino acids and derivatives	Amino acids and derivatives	6061-13-8	1	2008300	2023800	1909500	1740500	2068200	1875200	2423100	2437500	2291900	2138200	2476500	2325500	2117900	1950600	1874700	3206900	4061000	2954500	1636500	1584900	1403400	1632900	1422900	1532500	1663500	1706600	C03618	ko00630,ko00660,ko01100,ko01200
pme0014	148.06	84	147.053	C5H9NO4	[M+H]+	L-Glutamic acid	Amino acids and derivatives	Amino acids and derivatives	56-86-0	1	102800000	104720000	93933000	91968000	86298000	88717000	83256000	74874000	94283000	103350000	102630000	106840000	100570000	110990000	100060000	103030000	120520000	109370000	71173000	61192000	59835000	66428000	72605000	74593000	74666000	74832000	C00025	ko00220,ko00250,ko00330,ko00332,ko00340,ko00430,ko00480,ko00630,ko00650,ko00660,ko00860,ko00910,ko00970,ko01100,ko01110,ko01200,ko01210,ko01230,ko02010
mws1050	148.06	88	147.053	C5H9NO4	[M+H]+	O-Acetylserine	Amino acids and derivatives	Amino acids and derivatives	5147-00-2	3	384870	520310	541810	394060	364850	437410	375700	610640	608530	432970	347180	451780	442740	537470	492790	568050	538490	465780	411780	317040	359840	373050	374470	388140	391880	404920	C00979	ko00270,ko00908,ko00920,ko01100,ko01110,ko01200,ko01230,ko04122
MWSmce572	148.08	103.06	147.068	C9H9NO	[M+H]+	Cinnamamide	Others	Others	22031-64-7	3	16208	73251	54903	14591	13245	44028	24217	34349	7448.7	56268	9946.6	66851	9036.5	10842	35140	9361.8	3612.7	7840.5	41615	41230	37225	34739	39099	27710	35520	34937	--	--
MWSmce608	148.1	74.02	147.09	C6H13NO3	[M+H]+	4-Hydoxy-L-Isoleucine	Amino acids and derivatives	Amino acids and derivatives	781658-23-9	2	144070	134900	133250	119000	184390	187900	134130	191990	249750	180460	282890	228590	172130	122320	128790	229330	244140	110440	156660	150150	129820	145600	97937	100980	224030	96405	--	--
MWSmce190	148.09	74.02	147.09	C6H13NO3	[M+H]+	(2S,3R,4S)-4-Hydroxyisoleucine	Amino acids and derivatives	Amino acids and derivatives	55399-93-4	2	223630	197780	138680	144350	193730	136390	196030	187280	145580	207580	244690	277970	154930	229930	213880	205210	234220	216080	149840	105760	168480	136510	228470	100900	122170	159320	--	--
pmp001285	149.02	65.04	148.016	C8H4O3	[M+H]+	Phthalic anhydride	Phenolic acids	Phenolic acids	85-44-9	1	1294000	1446500	1375900	1329100	1590000	1549100	1090800	1183100	1241200	1342600	1403000	1395300	2191800	1530500	1180900	1225300	999840	1459200	908060	921910	889650	862270	930920	951760	918630	970280	--	--
Lmbn000216	147.03	57.03	148.037	C5H8O5	[M-H]-	3-Methylmalic acid*	Organic acids	Organic acids	152204-30-3	1	313170	300560	323940	292420	208200	321760	392310	316160	401510	331330	314510	395730	290500	396570	261420	344250	362590	329250	396980	479960	494250	475360	465970	450540	470480	388260	C06032	ko00290,ko00660,ko01100,ko01210,ko01230
Zmyn000230	147.03	57.03	148.037	C5H8O5	[M-H]-	2-Dehydro-3-deoxy-L-arabinonate	Others	Saccharides and Alcohols	-	1	330980	280220	266920	211370	203780	229920	284450	238590	333100	247470	245900	305380	235430	275860	272290	362460	334880	233310	442330	362030	443290	383710	356860	311800	402390	373010	C00684	ko00053,ko01100
ML10171848	147.03	85.03	148.037	C5H8O5	[M-H]-	D-Arabinono-1,4-lactone	Others	Saccharides and Alcohols	2782-09-4	1	114010	104370	104060	79203	83308	105540	91829	85133	138840	109130	96327	139660	71366	101630	86339	110850	130320	108720	137550	144440	154070	134470	163480	209590	157600	196890	C00652	--
pmb2826	147.03	87.1	148.037	C5H8O5	[M-H]-	L-Citramalic acid	Organic acids	Organic acids	6236-09-5	1	767430	730590	698020	426560	426100	507690	599840	570040	819450	712840	651130	957230	517210	745840	565460	669190	715870	711160	794110	786440	882440	879770	695820	791070	873220	840200	C02614	ko00660,ko01100
MWS3036	147.03	85.03	148.037	C5H8O5	[M-H]-	3-Hydroxyglutaric acid	Organic acids	Organic acids	638-18-6	3	66197	75072	73823	62479	52275	44030	87708	35780	50017	73214	24425	66019	28902	61295	68898	59035	77866	72299	68672	97259	92422	95013	115440	160900	95395	90570	--	--
Zmyn000247	147.03	57.03	148.037	C5H8O5	[M-H]-	2-Hydroxyglutaric Acid*	Organic acids	Organic acids	13095-48-2	1	337090	325030	246490	241940	269950	279430	355240	321120	425080	341400	293380	469580	228280	347580	382930	356340	325560	343790	466950	444490	504170	461160	441860	476140	511710	375820	C03196	ko00310,ko01100
MWS20194	149.06	103.06	148.052	C9H8O2	[M+H]+	Cinnamic acid	Phenolic acids	Phenolic acids	140-10-3	3	82052	97176	100340	78617	92887	83755	84285	100520	98210	83276	77041	56238	61062	65555	100170	46839	44253	49294	292890	344670	303240	312850	352640	328920	366480	372730	C00423	ko00130,ko00360,ko00940,ko00998,ko01100,ko01110
MWSmce698	149.1	65.04	148.089	C10H12O	[M+H]+	2',4'-Dimethylacetophenone	Others	Others	89-74-7	3	57713	62893	63081	90722	103500	94423	50850	48179	38337	50159	55177	65432	48819	41907	26473	55163	21434	28589	34215	29930	20233	25423	34258	14725	26672	26279	--	--
Lmgp000796	150.06	61.01	149.048	C8H7NO2	[M+H]+	4-Hydroxymandelonitrile	Alkaloids	Phenolamine	13093-65-7	1	2288800	2287000	2258000	1512600	1983000	1521500	2033500	1848300	2273700	1789500	2132600	2103500	2081200	2138800	1710500	1259700	1405100	947300	1459000	1480700	1537000	1687400	1509700	1537200	1527000	1566500	C00650	--
pme1210	150.06	61	149.051	C5H11NO2S	[M+H]+	L-Methionine	Amino acids and derivatives	Amino acids and derivatives	63-68-3	1	2368400	2411400	2274300	1485100	1897000	1585500	1968600	1872400	2469600	1647000	2193600	2138400	2132700	2124800	1877700	1240400	1509400	1035000	1477600	1568300	1546400	1796300	1509000	1549600	1513500	1535100	C00073	ko00270,ko00966,ko00970,ko01100,ko01110,ko01210,ko01230
mws0847	150.08	133	149.07	C6H7N5	[M+H]+	1-Methyladenine	Nucleotides and derivatives	Nucleotides and derivatives	5142-22-3	2	65954	105590	80836	73260	73288	51150	76701	54786	61088	66122	65000	72742	47394	50587	47975	28221	34363	20581	50631	51541	51600	56158	55415	71315	61999	65272	C02216	--
mws0262	149.01	87	150.016	C4H6O6	[M-H]-	L-Tartaric acid	Organic acids	Organic acids	87-69-4	3	1007900	1076900	1236900	1168700	791610	1004400	1205600	1366500	1069700	1426800	1419800	1313500	1058500	1141200	1204200	1293000	1994100	1625500	1952300	1954200	2226600	1848600	1981000	2111900	1922500	2346400	C00898	ko00630,ko01100
MWSmce676	149.05	59.01	150.053	C5H10O5	[M-H]-	D-Arabinose	Others	Saccharides and Alcohols	28697-53-2	2	594090	762680	703820	777290	544860	573100	667620	633380	578650	801290	787090	885350	555770	690600	731920	856100	1163900	1089200	872040	978390	950970	954430	865730	891290	872080	957700	C00216	--
MWSmce682	149.05	59.01	150.053	C5H10O5	[M-H]-	DL-Xylose	Others	Saccharides and Alcohols	25990-60-7	2	460510	577060	549880	686120	524850	530350	609920	557280	585890	638270	694950	808830	475910	604510	617160	704720	971070	782770	924520	763030	884860	880070	816420	746670	766020	935830	--	--
Zmgn000173	149.05	75.01	150.053	C5H10O5	[M-H]-	D-Ribose	Others	Saccharides and Alcohols	50-69-1	1	173090	238070	190650	141100	141030	181850	210540	192000	202160	294320	236170	260800	232620	357200	316750	306870	220730	309120	240100	228660	250930	230310	250620	250630	256020	260790	C00121	ko00030,ko01100,ko02010
Lmxp001668	151.08	91.05	150.068	C9H10O2	[M+H]+	2-Methoxy-4-ethenylphenol	Phenolic acids	Phenolic acids	7786-61-0	1	24135	6039.1	19325	143590	18357	23285	30245	9978.5	86784	711310	578480	993090	433500	747320	780610	2548800	4846200	1978600	832590	695910	648200	674690	870940	819600	813490	758830	C17883	--
pmf0420	149.06	74.9	150.068	C9H10O2	[M-H]-	Benzyl acetate	Organic acids	Organic acids	140-11-4	3	462370	446300	457610	464210	369760	510670	457550	429300	345780	477560	488300	424540	613180	519350	542890	494520	499120	647510	213610	263890	245740	257270	291850	289910	284240	329620	C15513	--
Lmxn006423	150	122.01	151.009	C7H5NOS	[M-H]-	2(3H)-Benzothiazolone	Alkaloids	Alkaloids	934-34-9	1	49706	28650	45089	101910	71631	60484	50735	57898	62425	53213	50954	39763	74445	66125	64115	53622	50052	49233	45242	49888	46517	51448	45251	53300	53930	57339	--	--
pme0183	152.06	135	151.049	C5H5N5O	[M+H]+	Isoguanine	Nucleotides and derivatives	Nucleotides and derivatives	3373-53-3	1	196390	327950	267480	157490	132040	250470	190950	189560	209680	206880	206040	345950	159690	169470	179410	536850	568180	485410	344970	334330	368200	362650	376590	351890	344780	375290	--	--
pme1109	152.06	135	151.049	C5H5N5O	[M+H]+	Guanine	Nucleotides and derivatives	Nucleotides and derivatives	73-40-5	1	1118200	1966000	2050700	1162500	959010	1648500	1242100	1328900	1097200	1440000	950940	2213000	968250	834400	1254400	4153600	4102100	3127300	2788700	2629000	2786700	2963500	2708500	2958100	2879300	2916200	C00242	ko00230,ko01100
mws4177	152.07	120.05	151.063	C8H9NO2	[M+H]+	Methyl Anthranilate	Phenolic acids	Phenolic acids	134-20-3	3	7770.6	7052.1	8054.5	10120	7529.7	7451.3	7596.6	9384.3	7024.1	10150	8215.7	10884	4007.2	6440.8	4543	3826.7	5636.4	4297.8	7775.8	4954.7	8046.8	4711	9244.8	7529.4	6371.5	8308	C20634	--
pme0256	151.03	151	152.033	C5H4N4O2	[M-H]-	Xanthine	Nucleotides and derivatives	Nucleotides and derivatives	69-89-6	1	95400	83014	88822	84484	71177	66896	118650	89742	82510	125520	138120	68991	83579	83044	83498	74577	167940	135870	125270	142290	175890	166790	163800	181130	136930	189660	C00385	ko00230,ko00232,ko01100,ko01110
MWS2984	153.05	136.03	152.045	C4H4N6O	[M+H]+	8-Azaguanine	Nucleotides and derivatives	Nucleotides and derivatives	134-58-7	3	131480	269560	255610	191330	148880	218240	160890	332270	183510	178370	138180	241870	81413	92022	187830	383970	393770	280970	305990	360760	318670	384730	293290	311960	319600	331270	--	--
mws0182	151.04	106.9	152.047	C8H8O3	[M-H]-	p-Hydroxyphenyl acetic acid	Phenolic acids	Phenolic acids	156-38-7	3	29928	52853	56369	21051	28282	45672	18291	33751	70144	35607	53869	38432	40060	35792	46922	34424	36970	48745	34003	36847	39976	37848	37768	48858	50282	15180	C00642	ko00350,ko00360,ko01100
MWSmce040	153.05	65.04	152.047	C8H8O3	[M+H]+	Isovanillin	Phenolic acids	Phenolic acids	621-59-0	3	312130	398000	329740	341660	390060	351930	451650	322170	323460	356020	297510	369270	342640	356150	394780	269270	271270	328460	633550	702700	637240	783860	764130	807800	713340	690130	--	--
Zmgn004894	151.04	136.02	152.047	C8H8O3	[M-H]-	Methyl 4-hydroxybenzoate*	Organic acids	Organic acids	99-76-3	3	107890	147950	113490	134510	108430	120960	128280	112500	143880	125450	82102	116320	140560	110360	151050	90979	102090	109260	219860	257390	256830	302510	272370	294790	258290	263610	--	--
MWS3149	151.04	107.05	152.047	C8H8O3	[M-H]-	3-Methoxybenzoic acid	Phenolic acids	Phenolic acids	586-38-9	3	59336	58588	70494	89402	76596	87667	67061	88023	77625	64155	72971	62686	73280	69074	45309	89725	84113	78236	47591	54118	62120	56206	60169	54998	58271	48241	--	--
mws0458	151.04	136	152.047	C8H8O3	[M-H]-	Vanillin*	Phenolic acids	Phenolic acids	121-33-5	2	925380	1194400	954270	947660	1071800	1069000	1112700	1031600	1149100	1016500	887230	1019100	1122300	1115100	1320000	765100	891320	846880	2028100	2243100	2048200	2313400	2406000	2322300	2208000	1909700	C00755	ko00998,ko01100,ko01110
MWS2058	151.04	107.05	152.047	C8H8O3	[M-H]-	3-Methylsalicylic Acid	Phenolic acids	Phenolic acids	83-40-9	3	4363.1	7693.8	6828.8	4685.9	5928.6	3900.3	2865.7	7158.8	5574.4	5429.8	6025.2	4193.7	4459.1	6276.8	6338.4	3951.6	4861.4	4816.2	5267.5	6160.5	9362.1	4049.7	4909.8	4684.3	4688	6378.2	C14088	--
MWS0687	153.07	108.04	152.059	C7H8N2O2	[M+H]+	1-Methyl-6-Oxo-1,6-Dihydropyridine-3-Carboxamide	Alkaloids	Pyridine alkaloids	701-44-0	2	17184	21955	21128	21188	17216	26485	10411	24665	22929	41449	35760	39412	20919	21467	20433	37340	43287	36932	25820	23815	24487	25369	23220	21952	19478	29972	--	--
pme0513	151.06	59	152.068	C5H12O5	[M-H]-	Xylitol	Others	Saccharides and Alcohols	87-99-0	1	38948	44188	37036	46136	54502	71138	43361	24794	41636	38040	50186	59728	55168	62772	39959	37517	19221	32488	21145	25363	15708	24018	34641	18786	23015	33652	C00379	ko00040,ko01100,ko02010
mws0437	151.06	71	152.068	C5H12O5	[M-H]-	D-Arabitol*	Others	Saccharides and Alcohols	488-82-4	1	87552	130250	166150	143360	113080	143610	98727	95718	95703	114760	147120	145850	119410	151870	148190	111230	130790	119400	127230	105020	111810	96254	115220	100550	113270	133700	C01904	ko00040,ko01100
mws0213	151.06	71	152.068	C5H12O5	[M-H]-	Ribitol*	Others	Saccharides and Alcohols	488-81-3	1	141010	149040	154000	105020	93923	170080	115390	94804	94341	150430	149220	181180	128630	146100	129650	88808	138020	119250	77544	125240	99842	93610	98488	144440	126270	116780	C00474	ko00040,ko00740,ko01100
MWS1962	153.13	83.05	152.12	C10H16O	[M+H]+	cis-Citral	Organic acids	Organic acids	5392-40-5	3	10136	11232	14244	10154	12042	10926	19965	10536	5888.8	9621.5	14031	10044	8961.9	13574	11236	6174.2	9908.1	7634.3	15282	17121	14318	13815	18941	20634	16407	23588	C09847	ko01110
mws0444	152.04	108	153.043	C7H7NO3	[M-H]-	3-Aminosalicylic acid	Phenolic acids	Phenolic acids	570-23-0	2	17964	25416	18791	11376	8848.9	14670	22392	16591	19590	17606	23559	25728	13071	18117	8153.2	44933	19410	30260	12147	18678	20759	30823	37550	26916	26110	32290	--	--
Hmlp000935	154.09	137.06	153.078	C8H11NO2	[M+H]+	Vanillylamine	Alkaloids	Phenolamine	1196-92-5	2	226600	177390	217380	393050	199310	251040	274390	371880	410390	660670	523460	812350	469510	548150	340650	4082600	2873600	2746900	536250	471520	548210	406540	538070	488180	466040	415300	C16666	ko00998,ko01100,ko01110
mws4002	154.09	137	153.079	C8H11NO2	[M+H]+	Dopamine	Alkaloids	Phenolamine	51-61-6	1	1398900	1186200	1495000	2165600	1341500	1923000	1449100	1356900	2069800	3934400	2776000	2706300	2551600	3764900	2237400	20121000	12512000	16560000	2523300	2583600	2558600	2434700	2344800	2785000	2251400	2273800	C03758	ko00350,ko00950,ko00965,ko01100,ko01110
mws0885	153.02	109.03	154.027	C7H6O4	[M-H]-	2,4-Dihydroxybenzoic acid	Phenolic acids	Phenolic acids	89-86-1	1	1003400	696160	838700	439000	445800	643110	486000	481120	201650	242740	107570	218990	305290	182200	183960	694710	1229000	345970	511850	361890	255270	338250	305540	180290	195340	102790	--	--
mws0180	153.02	109.03	154.027	C7H6O4	[M-H]-	2,5-Dihydroxybenzoic acid; Gentisic Acid	Phenolic acids	Phenolic acids	490-79-9	1	73082	55257	83293	24988	61190	64733	25356	64431	120810	146080	76970	188610	42957	127640	113100	179380	124600	203120	122610	87173	90145	135570	80543	114180	58425	112820	C00628	ko00350,ko01100
MWSmce264	153.06	123.05	154.063	C8H10O3	[M-H]-	Hydroxytyrosol	Phenolic acids	Phenolic acids	10597-60-1	3	6486	10197	11562	7448.7	3483.7	10008	3361.8	6531.9	8583.7	11046	5697	8674.8	6494.8	7998.8	7965.9	21209	12516	13111	9716.8	5504.8	9935.8	4966.3	6069.6	5437.9	7675	5832.9	--	--
mws0254	156.08	110	155.069	C6H9N3O2	[M+H]+	L-Histidine	Amino acids and derivatives	Amino acids and derivatives	71-00-1	1	1329400	1326300	1484100	537250	927180	790420	1555500	1859800	2057100	3800500	4535900	5314200	1609500	1723800	1159200	5214900	6579600	4417000	2165600	2225900	2253300	2013000	2328500	1983600	1954400	2016100	C00135	ko00340,ko00410,ko00970,ko01100,ko01110,ko01230,ko02010
pme2165	155.01	111	156.017	C5H4N2O4	[M-H]-	Orotic acid	Others	Vitamin	65-86-1	3	672750	580980	731870	562230	624050	679750	610710	658110	594490	237420	337940	414910	301990	446220	190890	168000	249670	243050	409150	386200	427750	494700	416870	398120	467710	462560	C00295	ko00240,ko01100
pmb0819	157	130	156.069	C10H8N2	[M+H]+	3-Indoleacetonitrile	Alkaloids	Plumerane	771-51-7	3	66778	51507	82544	74939	62977	76329	74407	99624	91322	119280	68619	121610	75385	58141	68070	250120	223140	209030	135070	122580	145280	126190	135840	161350	154490	162420	C02938	ko00380,ko01100
pmf0174	157.16	157.2	158.167	C10H22O	[M-H]-	1-Decanol	Others	Saccharides and Alcohols	112-30-1	3	3956200	3609900	3891600	4233300	3881100	3807500	3181800	4174600	3569700	4288100	3960700	3802300	3967700	4027700	4106600	3639200	3423600	3222100	3580200	3407200	3680300	3903900	3479400	3760900	3361900	3448400	C01633	--
Lmbn001467	158.08	116.07	159.09	C7H13NO3	[M-H]-	5-Acetamidopentanoic Acid	Organic acids	Organic acids	1072-10-2	3	87817	73272	64337	72609	67018	79189	113670	91604	83525	79922	65246	69877	79966	55616	61875	142940	144500	130690	250490	279560	309970	319620	298560	300820	307610	290640	C03087	ko00310,ko01100
mws0987	161.06	115	160.052	C10H8O2	[M+H]+	6-MethylCoumarin	Lignans and Coumarins	Coumarins	92-48-8	3	9268.7	12709	15196	5640.1	11763	12830	9647.3	14146	8221.1	9036.2	12295	17171	16274	12532	10616	14559	13011	13902	8130.9	6730.6	8583	9386.4	7742.1	7264.6	6204.2	8091.4	--	--
Lmbn002072	159.07	97.07	160.074	C7H12O4	[M-H]-	2-Propylsuccinic acid*	Organic acids	Organic acids	618-57-5	3	51808	1392.2	1341	3283.8	1418.2	1540	520.75	937	9	4943	481.25	7028.5	6088	5659.8	3799.5	1464	1654.8	6994.5	49837	38144	53601	48499	54414	40580	48128	36822	C16657	--
Zmjn001813	159.07	97.06	160.074	C7H12O4	[M-H]-	Pimelic acid*	Organic acids	Organic acids	111-16-0	3	43705	962.5	2294.5	1880.5	1204.8	1819.5	900.5	2233.8	1422.8	2823.5	4218	5883.8	3295.2	6607.5	7368.5	4644	4690.8	9425.8	39092	36046	28978	22400	28194	45007	51865	52233	C02656	ko00780,ko01100
mws0005	161.11	144	160.1	C10H12N2	[M+H]+	Tryptamine	Alkaloids	Plumerane	61-54-1	1	16915000	24167000	20288000	33856000	14976000	23209000	17245000	26240000	23947000	32220000	38358000	61285000	6797400	10597000	13293000	100730000	140090000	66489000	28227000	25336000	26754000	25958000	26453000	27786000	25880000	27915000	C00398	ko00380,ko00901,ko01100,ko01110
mws1417	160.04	116	161.048	C9H7NO2	[M-H]-	Indole-3-carboxylic acid	Alkaloids	Plumerane	771-50-6	3	93699	132940	147650	96784	100240	113750	87661	100750	102980	157890	111540	138740	188290	148560	128590	113950	129330	161050	155140	164690	157820	172350	160760	154780	186090	183190	C19837	--
mws0102	160.04	116	161.048	C9H7NO2	[M-H]-	Indole-5-carboxylic acid	Alkaloids	Plumerane	1670-81-1	3	67416	67847	85457	48832	62650	55579	56028	55356	59832	97143	74949	68999	125920	109120	119030	71857	78585	102380	88224	116930	112480	114230	104270	111340	99069	91074	--	--
Lmgp001898	162.06	116.05	161.048	C9H7NO2	[M+H]+	4,6-Dihydroxyquinoline	Alkaloids	Quinoline alkaloids	3517-61-1	1	4737.9	8531.2	8460.8	1162.1	5098.8	12128	4673.2	12495	8150.6	23056	11811	6027.2	8382.9	3502.5	8210.8	12402	7613.1	19098	7165.9	15778	6270.2	12515	17485	10472	13702	5249.2	C05639	ko00380,ko01100
pme3382	160.06	98	161.069	C6H11NO4	[M-H]-	N-Acetyl-L-threonine	Amino acids and derivatives	Amino acids and derivatives	17093-74-2	3	85250	75075	81613	104280	89139	100890	124690	107720	88867	88942	68639	71398	84166	98663	77645	83426	76683	94105	89521	98666	100600	112080	108060	92390	112430	96968	--	--
mws1346	162.08	98	161.069	C6H11NO4	[M+H]+	DL-2-Aminoadipic acid	Alkaloids	Alkaloids	542-32-5	3	257620	265350	262440	227990	257850	266110	220990	221220	223860	182280	224740	266730	282800	229400	205620	103400	220710	169110	512190	481370	477490	522750	550440	582930	523250	579580	C00956	ko00300,ko00310,ko00311,ko01100,ko01110,ko01210,ko01230
pme2761	161	73	162.016	C5H6O6	[M-H]-	4-Hydroxy-2-oxoglutaric acid	Organic acids	Organic acids	1187-99-1	3	98644	145700	132360	109420	93101	61922	121960	132790	86170	153880	97370	105270	60568	107200	128690	49510	80954	78606	99100	76989	97639	99146	116700	91908	133510	89110	C01127	ko00630,ko01100
pme2914	161.05	99	162.053	C6H10O5	[M-H]-	3-Hydroxy-3-methylpentane-1,5-dioic acid	Amino acids and derivatives	Amino acids and derivatives	503-49-1	1	115610	108460	122800	201640	170210	112910	156830	121580	145900	218670	222300	211770	224990	187230	218180	553530	430840	467130	4956500	6077700	6726300	6420400	5156000	6427500	6406300	6475300	C03761	--
MWS0559	161.05	71.01	162.053	C6H10O5	[M-H]-	1,6-anhydro-β-D-glucose	Others	Saccharides and Alcohols	498-07-7	3	13833	35554	52523	31345	27732	41155	10104	11952	14358	12463	34268	26322	21212	43743	32810	17134	12792	13800	45316	37805	47172	48740	53460	52111	31057	57526	--	--
pmf0440	163.08	91.1	162.068	C10H10O2	[M+H]+	4-MethoxycinnaMaldehyde	Phenolic acids	Phenolic acids	1963-36-6	3	162130	135350	153130	137600	172840	126720	124190	131280	119700	120250	135970	135500	160530	136410	128030	140160	136630	185420	65452	56997	57936	51959	79413	67261	74562	90197	C10475	--
pme2758	162.04	144	163.048	C5H9NO5	[M-H]-	4-Hydroxy-L-glutamic acid	Amino acids and derivatives	Amino acids and derivatives	3913-68-6	2	41620	26596	34485	19368	27611	25892	44934	29266	33277	30417	24248	17659	31606	16886	22562	17182	18514	21112	26741	31478	15769	22593	26472	32090	18048	26514	C03079	--
pme1419	164.07	104	163.067	C6H13NO2S	[M+H]+	L-Methionine methyl ester	Amino acids and derivatives	Amino acids and derivatives	10332-17-9	3	116300	114540	117130	79057	82823	86029	72481	96382	101900	112770	98459	141320	112630	120180	130110	60731	70249	35921	72965	61263	69391	75587	79092	78998	74401	79456	--	--
Lmbp000123	164.07	56.05	163.067	C6H13NO2S	[M+H]+	L-Homomethionine	Amino acids and derivatives	Amino acids and derivatives	25148-30-5	3	739300	979680	1195400	574590	844280	962570	910670	857950	958360	1148100	870190	682000	1026200	1049700	673480	394900	907660	434460	656120	746410	833180	789360	861340	812100	686470	668080	C17213	ko00966,ko01110,ko01210
mws1641	165.04	120.02	164.033	C6H4N4O2	[M+H]+	Lumazine	Nucleotides and derivatives	Nucleotides and derivatives	487-21-8	3	24837	52785	41284	28316	25229	34903	39097	60097	40111	49420	34057	74613	1420.9	21566	30960	30218	31291	12906	28499	26447	34975	27026	33727	28741	36182	22138	C03212	--
Lmmn001643	163.04	119.05	164.047	C9H8O3	[M-H]-	2-Hydroxycinnamic acid	Phenolic acids	Phenolic acids	583-17-5	3	3067000	6059400	6365600	2686900	3067700	5516000	5181200	4323200	2804100	5575000	2892700	8321300	1945700	3058300	4351000	3394100	3699800	2833600	3234300	3361400	3580700	3281500	3510000	3285200	3136200	3421800	C01772	ko00360,ko00940,ko01100,ko01110
pmb0142	165.1	95.2	164.047	C9H8O3	[M+H]+	Caffeic aldehyde	Phenolic acids	Phenolic acids	141632-15-7	3	296340	333110	297850	282570	322520	301600	371070	324340	342880	289850	301320	297550	352110	327220	300700	259690	285380	243790	228310	234680	224190	232670	239010	248260	238030	243710	C10945	ko00940,ko01110
MWSCX017	165.05	119.05	164.047	C9H8O3	[M+H]+	4-hydroxyphenyl acrylaldehyde	Others	Others	-	3	320460	515540	411820	275570	256190	457400	424770	314520	203620	446880	260560	635770	181580	234290	409810	176560	206840	203420	259200	290360	299490	244290	282650	298520	340830	311830	--	--
mws0159	163.04	91	164.047	C9H8O3	[M-H]-	Phenylpyruvic acid	Organic acids	Organic acids	156-06-9	2	3068900	2930300	3030400	2832200	3047100	2848200	3037000	3260000	2970300	2602400	2658600	2586400	2668900	2743800	2721100	2622700	2593800	2454100	2321100	2215800	2095500	2350500	2112000	2260900	1978600	2275500	C00166	ko00360,ko00400,ko00960,ko01100,ko01110,ko01210,ko01230
Lmbn002739	163.04	119.05	164.047	C9H8O3	[M-H]-	3-Hydroxycinnamic Acid	Phenolic acids	Phenolic acids	14755-02-3	3	338400	348060	396340	310770	287620	350630	243890	237620	261960	628610	454930	741400	585950	552150	707880	175030	353390	291410	294520	374940	260900	266100	294930	291800	325910	321780	C12621	ko00360,ko01100
pme1439	165.05	119	164.047	C9H8O3	[M+H]+	p-Coumaric acid	Phenolic acids	Phenolic acids	501-98-4	2	8424400	12020000	11622000	6856200	10186000	4348100	6647000	13702000	6730300	17768000	9212000	8986700	16872000	10256000	7667800	13056000	12185000	13302000	8945200	10985000	5298800	5552600	8587600	6751000	6355700	5476200	C00811	ko00130,ko00350,ko00940,ko00950,ko00998,ko01100,ko01110
pme2529	163.2	101	164.068	C6H12O5	[M-H]-	1,5-Anhydro-D-glucitol	Others	Saccharides and Alcohols	154-58-5	3	87018	116880	72218	112960	63334	105480	144390	84424	128550	193610	138360	238870	120830	123320	80461	203540	145480	132560	64191	65186	87348	92718	37966	53129	44055	54548	C07326	--
mws0854	163	59.01	164.068	C6H12O5	[M-H]-	Rhamnose	Others	Saccharides and Alcohols	3615-41-6	3	174350	184420	172730	183250	206820	177490	162740	227590	179260	203340	264890	221170	142540	203840	174940	144380	192240	179530	140400	162300	196310	168370	183410	186620	175940	167330	C00507	ko00051,ko01100
pme3083	164.04	120	165.043	C8H7NO3	[M-H]-	2-(Formylamino)benzoic acid	Phenolic acids	Phenolic acids	3342-77-6	3	437920	988430	801330	442330	400580	659540	777880	634460	439770	604440	369810	900780	219210	313370	608070	201360	374840	301590	549330	642850	651410	609980	600640	637610	530140	627000	C05653	ko00380,ko01100
pme2617	166.05	102	165.046	C5H11NO3S	[M+H]+	L-Methionine Sulfoxide	Amino acids and derivatives	Amino acids and derivatives	3226-65-1	3	5078200	4064000	4246900	5011100	4592000	3801100	5854200	5023400	4847000	5115800	5555000	4275900	4744300	3466500	4354800	4628500	6251700	4392900	8473300	7872800	7612000	7588900	8033100	7969200	7978800	7767300	C02989	ko00270
pme3968	166.07	149.05	165.065	C6H7N5O	[M+H]+	7-Methylguanine	Nucleotides and derivatives	Nucleotides and derivatives	578-76-7	3	42396	43754	59519	33924	32426	53485	37361	36351	22096	9	9	9	9	9	9	9	9	9	31914	25138	33271	28769	24198	40826	31989	30301	C02242	--
MWS4525	166.07	124.05	165.065	C6H7N5O	[M+H]+	6-O-methylguanine	Nucleotides and derivatives	Nucleotides and derivatives	20535-83-5	1	57476	80442	97412	65500	76144	90934	74166	50184	52278	18619	4727.7	33348	4189.6	9	23267	9	9	9	68039	51635	57093	65020	42835	65928	64757	62807	--	--
pme0021	166.09	120.08	165.07	C9H11NO2	[M+H]+	L-Phenylalanine	Amino acids and derivatives	Amino acids and derivatives	63-91-2	1	15255000	15511000	15756000	11584000	13451000	12532000	14444000	18610000	17925000	17774000	11979000	13495000	10075000	11598000	11231000	21121000	19040000	19252000	14767000	14330000	14542000	14119000	16112000	16246000	15966000	15656000	C00079	ko00360,ko00400,ko00460,ko00940,ko00960,ko00966,ko00970,ko00998,ko01100,ko01110,ko01210,ko01230,ko02010
pmb0037	166.12	121.3	165.115	C10H15NO	[M+H]+	Hordenine	Alkaloids	Phenolamine	539-15-1	3	539180	698790	630380	523030	579500	683440	481200	488740	517820	697800	1024400	1387700	796030	964530	458640	2493600	3766000	1672900	614710	608780	651140	668800	695390	739860	725830	834810	C06199	ko00350,ko01100
pme0282	165.02	77.04	166.027	C8H6O4	[M-H]-	Phthalic acid	Phenolic acids	Phenolic acids	88-99-3	1	358110	406160	395350	391760	438300	503420	338870	287470	287360	280810	270070	282040	327360	292750	280830	241770	281170	275980	249370	283470	274540	268170	304640	289900	265370	252390	C01606	ko01100,ko02010
pme0281	165.02	121.03	166.027	C8H6O4	[M-H]-	Terephthalic acid	Phenolic acids	Phenolic acids	100-21-0	1	5900400	6291800	6956900	6251900	6998500	7454800	4904900	5357700	5003200	4533600	4208000	4302400	5226200	4419500	4249600	3868500	4418900	4026700	4569200	4442100	4313600	4456600	4557300	4874400	4608100	4399600	C06337	ko01100
pmc0274	167.1	121.1	166.031	C6H6N4S	[M+H]+	6-Methylmercaptopurine	Nucleotides and derivatives	Nucleotides and derivatives	50-66-8	3	15499000	15326000	16447000	11361000	13134000	12584000	14573000	18272000	17666000	17592000	12656000	14575000	10178000	11478000	11233000	21329000	18702000	19734000	14530000	14288000	14683000	14404000	15773000	16684000	16362000	16110000	C16614	--
mws0344	165.04	75	166.048	C5H10O6	[M-H]-	D-Xylonic acid	Organic acids	Organic acids	526-91-0	1	1916100	1982400	1968100	1848500	1638900	1807200	2918600	2531300	2331700	1962500	1860500	1664200	1422400	1424600	1507700	2221800	2459700	2937500	2126800	2238600	1768000	2386700	2161800	2207000	2216500	2482500	C00502	ko00040,ko01100
Lmrn003000	165.06	103.06	166.063	C9H10O3	[M-H]-	2-Hydroxy-3-phenylpropanoic acid	Phenolic acids	Phenolic acids	7326-19-4	1	2380.2	5306.2	3522.2	3233.8	4821.8	2914.2	18640	15124	41321	128830	93158	90552	78564	98502	98355	117270	101830	107230	39574	49217	51092	51938	73018	74282	66225	46070	C05607	ko00360,ko00960,ko01100
Lmbn005172	165.06	119.05	166.063	C9H10O3	[M-H]-	2,6-Dimethoxybenzaldehyde	Phenolic acids	Phenolic acids	3392-97-0	1	8771.8	8760.5	13333	21907	10710	17585	26002	30953	53189	162980	176210	162580	118240	157660	113840	185880	166630	174250	89434	86697	86737	82111	84048	103000	77888	99352	--	--
MWSmce528	167.07	124.05	166.063	C9H10O3	[M+H]+	2,3-Dimethoxybenzaldehyde	Phenolic acids	Phenolic acids	86-51-1	3	2442.7	5457.9	3831	3302.3	3724.1	3212.2	3267.7	3852.6	2875.6	1930.3	3309	2289.2	3382	3187.4	4948.2	5181.1	2897.2	3394.6	1454.3	936.96	2470	2848.4	2487.7	1836.3	3183.6	2996.1	--	--
pmn001681	165.09	149.06	166.099	C10H14O2	[M-H]-	1-(4-Methoxyphenyl)-1-propanol	Phenolic acids	Phenolic acids	5349-60-0	3	245860	235150	212420	210890	188130	212130	151630	123440	215190	216820	192900	229890	252300	227980	189130	197990	154740	248510	94952	87578	109460	131940	104820	102000	84997	119380	--	--
NK10253223	168.06	94.06	167.058	C8H9NO3	[M+H]+	2-Amino-3-methoxybenzoic acid	Phenolic acids	Phenolic acids	3177-80-8	1	482880	560070	595590	463850	503110	582990	547330	507280	533200	412530	456400	406670	299070	284520	411700	353700	356170	363310	474180	440480	458620	484510	448270	467630	497050	525620	C05831	ko00380
Zmjp000624	168.06	150.05	167.058	C8H9NO3	[M+H]+	Pyridoxal	Others	Vitamin	66-72-8	1	426040	533120	535520	451400	479370	513100	531050	458900	507200	400160	415850	353510	280040	273750	381420	310390	340900	356240	409790	409830	418700	447110	423600	442700	434920	435680	C00250	ko00750,ko01100
Hmtp000776	168.07	105.03	167.059	C8H9NO3	[M+H]+	4,5,6-Trihydroxy-2-cyclohexen-1-ylideneacetonitrile	Alkaloids	Alkaloids	-	3	285830	301720	301920	220130	238300	225420	282900	369450	339830	323250	229830	256620	187100	206570	213830	406390	362620	389490	273640	272790	271820	279040	286710	329590	303820	303540	--	--
mws2125	166.98	78.7	167.982	C3H5O6P	[M-H]-	Phosphoenolpyruvate	Organic acids	Organic acids	138-08-9	3	188070	71850	63352	60992	121590	58018	52749	83845	127060	527000	459690	186010	654050	535220	620710	11945	5412.2	13522	158220	198290	168070	204270	189120	159910	201930	157480	C00074	ko00010,ko00020,ko00400,ko00440,ko00620,ko00710,ko00998,ko01100,ko01110,ko01200,ko01230
MWSmce501	167.04	108.02	168.042	C8H8O4	[M-H]-	Protocatechuic Acid Methyl Ester	Phenolic acids	Phenolic acids	2150-43-8	3	51930	22796	18948	23782	34686	26783	14844	35831	100030	111870	56592	106670	90344	96894	158400	96405	65038	106670	107830	108890	142920	141320	130520	140050	147210	136810	--	--
Hmbp001276	169.05	65.03	168.042	C8H8O4	[M+H]+	Gallacetophenone	Phenolic acids	Phenolic acids	528-21-2	1	56481	50427	49323	51130	38613	40939	56452	46228	45138	151420	136370	85451	107900	125230	126360	147840	123290	116600	83535	90374	84749	89749	88220	89265	82786	92270	--	--
pme1292	167.1	123.04	168.042	C8H8O4	[M-H]-	Homogentisic acid	Phenolic acids	Phenolic acids	451-13-8	3	208940	207400	185240	220560	219220	206410	244360	234800	196530	294900	115460	61423	88056	76784	159960	57570	275110	296690	270020	193500	296410	276200	267380	214080	267650	261230	C00544	ko00130,ko00350,ko01100
mws0028	167.03	108.02	168.042	C8H8O4	[M-H]-	Vanillic acid	Phenolic acids	Phenolic acids	121-34-6	1	329940	538320	466240	432750	343830	420290	284860	379010	658580	276580	396210	349580	322580	360890	306920	441770	453130	394170	300540	297360	334600	304020	339790	324660	301480	322080	C06672	--
pme2598	167.03	123.04	168.042	C8H8O4	[M-H]-	3,4-Dihydroxybenzeneacetic acid	Phenolic acids	Phenolic acids	102-32-9	3	1529600	1850300	1670900	2223800	1491200	1812500	1917700	2002600	1403000	3722900	2431400	2992500	1714400	2462900	1921400	6472200	8532600	4871700	2477400	2029000	2201000	2358700	2569400	2472900	2787700	2897000	C01161	ko00350,ko01100
Zmsp001834	169.05	65	168.042	C8H8O4	[M+H]+	2,6-Dimethoxy-1,4-benzoquinone	Quinones	Quinones	530-55-2	1	602910	567330	716180	546610	753370	706200	712900	777110	726680	569480	597760	454020	910520	687710	623700	643160	772600	633420	788840	678930	753350	751680	746360	725270	857690	806700	C10331	--
MWSmce490	167.04	123.05	168.042	C8H8O4	[M-H]-	2',4',6'-Trihydroxyacetophenone	Phenolic acids	Phenolic acids	480-66-0	3	15174	26264	16286	18663	9925.9	17284	7197.7	11570	15618	11791	8608.5	9856.5	14848	19633	14187	21087	17048	23643	20885	17110	22923	18574	18991	18673	11822	24021	C21895	--
MWSslk066	169.05	65.04	168.042	C8H8O4	[M+H]+	3-Hydroxy-4-methoxybenzoic acid	Phenolic acids	Phenolic acids	645-08-9	3	167750	287020	231680	132470	127740	212940	110430	185180	325980	199620	277290	237850	236380	214360	186310	280760	281440	268990	191210	214210	198940	185630	193480	217690	222440	214720	--	--
MWStz091	169.1	70.07	168.09	C8H12N2O2	[M+H]+	Cyclo(L-Ala-L-Pro)	Amino acids and derivatives	Amino acids and derivatives	36357-32-1	3	81663	99003	93726	67553	65388	87277	81960	101180	92132	124060	109000	121390	95412	98354	103180	81965	72991	80883	73283	72014	74484	72545	74407	75463	79459	81386	--	--
pme1383	170.08	134.1	169.074	C8H11NO3	[M+H]+	Pyridoxine	Others	Vitamin	65-23-6	1	255000	474080	527580	362550	444360	401060	481920	380740	390150	347290	441230	426910	284730	128270	303540	310810	374530	192180	266160	279440	279220	293930	303480	289670	293220	294550	C00314	ko00750,ko01100
MWS0933	170.09	124.09	169.085	C7H11N3O2	[M+H]+	1-Methylhistidine	Amino acids and derivatives	Amino acids and derivatives	332-80-9	3	60539	33342	65588	48914	36996	70793	70260	61458	50053	57770	70342	41435	72024	38197	24496	40812	52970	28474	56388	43140	49254	42075	59853	58231	46474	56612	--	--
pme0181	170.09	124	169.085	C7H11N3O2	[M+H]+	3-Methyl-L-Histidine	Amino acids and derivatives	Amino acids and derivatives	368-16-1	3	24624	27794	14903	21625	21688	20044	17449	19726	10698	12572	19076	38051	19613	20747	18727	12619	35527	19890	22707	26552	29814	45142	25913	35086	37719	30838	C01152	ko00340,ko01100
Zmzn000078	168.99	78.96	169.998	C3H7O6P	[M-H]-	Dihydroxyacetone phosphate	Others	Saccharides and Alcohols	57-04-5	3	100690	79927	84159	79710	131560	88697	52489	111530	117640	162770	151220	80490	245790	191850	218860	7963.4	9657.1	9074	60631	56001	51040	82142	68907	65402	49005	71375	C00111	ko00010,ko00040,ko00051,ko00052,ko00561,ko00562,ko00564,ko00640,ko00710,ko00760,ko01100,ko01110,ko01200,ko01230
pme3186	169	79	169.998	C3H7O6P	[M-H]-	DL-Glyceraldehyde-3-phosphate	Organic acids	Organic acids	591-59-3	3	146770	128480	151620	179970	211210	142680	100800	126060	174130	207280	210620	143900	412860	359980	323840	30763	41167	38152	165920	118060	143950	172920	131210	123430	127600	141560	C00661	--
MWSslk138	169.01	151	170.022	C7H6O5	[M-H]-	2,3,4-Trihydroxybenzoic acid	Phenolic acids	Phenolic acids	610-02-6	2	115980	145180	206290	117390	123140	117720	128490	139950	169610	106600	64900	100780	57782	98735	116880	127990	139050	163790	74468	87759	104190	81795	76007	85012	87928	99797	--	--
Hmln008318	169.12	151.11	170.131	C10H18O2	[M-H]-	8-Methyl-6-nonenoic acid	Organic acids	Organic acids	59320-77-3	3	5709.2	5422.4	5667.7	9316.4	6514.7	6658.6	5190.9	3918.5	5492.7	5157.2	5291.8	5596.9	8631.9	6218.5	10817	4500.5	3990.1	3238	4141	4559.1	4504.6	2448.9	4121.8	4850.7	3822.9	4020	C18202	ko00998,ko01100,ko01110
MWS1812	171.17	55.05	170.167	C11H22O	[M+H]+	2-Undecanone	Others	Others	112-12-9	3	12701	5413.1	13318	9253.7	11616	9969.1	22541	8603	14777	7032	5517.3	2989.2	10246	6650.1	17960	3310.8	10231	1669	57788	49189	58089	61673	44974	45259	61573	51381	C01875	--
Lmbn003524	171.1	99.08	172.11	C9H16O3	[M-H]-	9-Oxononanoic acid	Organic acids	Organic acids	2553-17-5	3	10360	8553.1	8132.4	6004	9208.7	6401.7	7324.9	5196.3	8859	4243.3	6942.6	7362.3	8759.5	10901	8338.8	4406.7	10528	4582.8	17553	21092	15783	16026	17239	17983	19538	20677	C16322	ko00592,ko01110
MWSmce584	138.09	77.04	173.061	C8H11NO	[M-Cl]+	Tyramine	Alkaloids	Alkaloids	60-19-5	2	730080	792230	763640	882130	678200	828860	754350	787910	671220	534510	597470	658400	548200	593380	588130	705810	1207200	635300	769220	644340	651670	638910	726630	673660	720050	711380	--	--
pme0253	174.11	86	173.105	C8H15NO3	[M+H]+	N-Acetyl-L-leucine	Amino acids and derivatives	Amino acids and derivatives	1188-21-2	3	32701	53886	41135	30633	55772	46469	58084	62003	49283	63902	64168	42342	58759	37419	53366	34462	42708	32304	60269	59839	49460	60260	78458	60576	59860	61155	C02710	--
pme3009	175.02	99	174.016	C6H6O6	[M+H]+	Trans-Citridic acid	Organic acids	Organic acids	4023-65-8	2	548970	553690	579700	614640	556560	503880	498460	520530	471490	726220	220540	397500	532380	604000	593200	449050	262230	452730	635010	593230	877990	209570	320770	662180	575860	522420	C02341	ko00660,ko01100
MA10039492	173.01	71.03	174.016	C6H6O6	[M-H]-	Dehydroascorbic acid	Others	Vitamin	490-83-5	1	577990	561690	632770	293940	362410	486120	342570	369870	551460	599150	750550	974800	707210	860020	546540	597540	675050	404800	379590	421080	426170	411900	508560	507950	412110	573370	C05422	ko00053,ko00480,ko01100
mws0242	173.08	111	174.089	C8H14O4	[M-H]-	Suberic Acid	Organic acids	Organic acids	505-48-6	2	61782	54564	60388	58124	39860	48394	64066	62532	54494	104540	73964	102110	70246	56792	78372	21366	44144	34245	73504	81046	71869	88262	85582	71981	89246	80326	C08278	--
Lmgn002555	173.08	59.01	174.089	C8H14O4	[M-H]-	2-Propylglutaric acid	Organic acids	Organic acids	32806-62-5	2	827420	970970	1032400	786160	702250	785090	1311600	1647100	5004800	17476000	13264000	11913000	11592000	12481000	11649000	17108000	21109000	18814000	10127000	10625000	10221000	10476000	10492000	9461600	10142000	10133000	C16658	--
Zmyn000155	173.11	131.08	174.1	C7H14N2O3	[M-H]-	N-α-Acetyl-L-ornithine	Amino acids and derivatives	Amino acids and derivatives	6205-08-9	1	69748	60382	58846	12078	35176	40970	139420	270680	76446	253290	131500	174420	38630	40148	33342	2532600	3783900	3947400	317190	239740	249050	297020	320420	320210	314870	270120	C00437	ko00220,ko01100,ko01110,ko01210,ko01230
mws0260	175.12	116	174.112	C6H14N4O2	[M+H]+	L-Arginine	Amino acids and derivatives	Amino acids and derivatives	74-79-3	1	568320	520340	835980	236100	743480	613140	944970	1485100	940430	1572300	1088400	1206600	645750	792430	288560	14689000	9344700	12213000	1364200	1246500	1705300	1487600	2006700	1999200	1749700	1440500	C00062	ko00220,ko00261,ko00330,ko00472,ko00970,ko01100,ko01110,ko01230,ko02010
pme2559	174.04	88	175.048	C6H9NO5	[M-H]-	N-Acetyl-L-Aspartic Acid	Amino acids and derivatives	Amino acids and derivatives	997-55-7	3	47692	36661	59959	45273	66682	56224	77872	79917	73724	34536	42113	27292	58530	33831	51314	68737	69509	74159	72707	96469	109570	96232	93900	101660	82968	90271	C01042	ko00250,ko01100
pme0008	176.1	113	175.096	C6H13N3O3	[M+H]+	L-Citrulline	Amino acids and derivatives	Amino acids and derivatives	372-75-8	2	48403	12458	22401	20053	33818	42854	27915	76709	66532	83816	102040	131670	37460	48940	47938	285480	414290	233440	62693	68248	52192	75413	67786	79420	88215	67880	C00327	ko00220,ko01100,ko01110,ko01230
MWSmce690	175.02	59.01	176.032	C6H8O6	[M-H]-	Erythorbic Acid; Isoascorbic Acid	Others	Vitamin	89-65-6	1	190050	322890	306820	246130	265840	287020	220650	214030	348360	530800	690790	2614700	518170	550270	405080	2534700	2980000	432080	274940	270470	282610	307530	301460	279580	260570	311080	--	--
mws1075	177.05	121	176.047	C10H8O3	[M+H]+	7-Methoxycoumarin	Lignans and Coumarins	Coumarins	531-59-9	2	14882	11933	13588	17699	21131	17031	19028	15121	5915.1	14133	15383	2229.5	5148.3	5458.7	9002.6	22846	19381	14756	8768.5	6113.6	6917.5	9669.3	8930.4	7364.6	8368.3	6994.7	C09268	--
Zmgn001448	175.06	115.04	176.068	C7H12O5	[M-H]-	2-Propylmalic Acid*	Organic acids	Organic acids	-	2	1850700	1539100	2161300	1373900	1514700	1105600	1743700	1775800	2781800	2160900	2745100	2719500	3267800	3333300	2386400	1586200	1282200	1489300	1861000	2305800	2286000	2392500	2377600	2417100	2493700	2109700	C05994	ko00620
Lmbn001754	175.06	115.04	176.068	C7H12O5	[M-H]-	3-Isopropylmalic Acid*	Organic acids	Organic acids	921-28-8	2	1803900	1826400	2107300	1291400	1539800	1231000	1768200	1811100	2577000	2199500	2836400	2637700	2777600	3203600	2491600	1671900	1299200	1476300	1923000	2468300	2268800	2166500	2294100	2555200	2193700	2009100	C04411	ko00290,ko01100,ko01110,ko01210,ko01230
pmb3101	175.06	115	176.068	C7H12O5	[M-H]-	2-Isopropylmalic Acid	Organic acids	Organic acids	49601-06-1	1	1776400	1781100	1912800	1279700	1409200	1100100	1492900	1509200	2530300	1957700	2594000	2534200	2908900	2969100	2294100	1477900	1161800	1338500	1793100	2052100	2147600	2155900	2113600	2216200	1958800	2117000	C02504	ko00290,ko00620,ko01100,ko01110,ko01210,ko01230
pme2024	177.1	160	176.095	C10H12N2O	[M+H]+	Serotonin*	Alkaloids	Plumerane	50-67-9	1	2109300	3062200	2604400	6085200	2473700	3885000	2865300	5034500	3316500	3176700	2302300	3585200	544530	1068200	1345800	12449000	12041000	9474500	3860800	3556000	3540500	3694900	3556300	3560600	3795300	3756100	C00780	ko00380,ko01100
pmb0774	177.1	160.3	176.095	C10H12N2O	[M+H]+	N-Hydroxytryptamine*	Alkaloids	Plumerane	-	1	1958000	2852500	2371300	5674000	2224800	3684700	2618100	4588800	3213400	3029800	2116700	3026500	504050	968370	1369900	11553000	11267000	8903700	3459000	3187200	3381200	3432800	3297500	3662900	3665700	3567700	C17203	ko00380,ko01100
pmb0468	178	161	177.046	C6H11NO3S	[M+H]+	N-Formyl-L-Methionine	Amino acids and derivatives	Amino acids and derivatives	4289-98-9	3	43107	59776	52632	115350	45990	76336	61504	93654	59999	76178	50565	80768	12802	18474	31334	231440	245550	203930	83415	69803	66965	76726	77530	81195	82164	71210	C03145	ko00270
mws1013	177.02	133.2	178.027	C9H6O4	[M-H]-	Esculetin	Lignans and Coumarins	Coumarins	305-01-1	1	1506400	1377300	1899900	1254200	1717800	1450100	1766600	1647000	1652700	374140	247770	375710	478000	534740	345470	316140	481820	568220	520640	600190	961780	829620	697950	448860	772070	839510	C09263	--
Hmsp003093	179.03	77.04	178.027	C9H6O4	[M+H]+	3,7-Dihydroxychromen-4-one	Others	Others	-	3	98795	106570	80527	52006	60764	93870	95742	70626	63949	52195	49286	57959	96395	50928	92044	41763	46028	47249	72944	53719	71893	67804	66243	66431	59000	78242	--	--
MWSmce220	177.04	59.02	178.048	C6H10O6	[M-H]-	D-Glucono-1,5-lactone	Organic acids	Organic acids	90-80-2	3	690790	768150	667660	787370	597280	924720	838290	997860	1050400	896080	969470	1137300	719920	1083700	783660	1188100	1034000	1278300	720320	664500	724250	802550	781650	675950	545100	660980	C00198	ko00030,ko01100,ko01110,ko01200
mws1195	179.07	147.1	178.063	C10H10O3	[M+H]+	p-Coumaric acid methyl ester*	Phenolic acids	Phenolic acids	3943-97-3	2	139830	166120	142440	134110	148930	149780	162500	160180	148180	178490	151020	238340	117500	146710	197710	188980	199180	202090	151990	143430	146300	165650	146090	209320	168820	181910	--	--
mws0009	179.07	91	178.063	C10H10O3	[M+H]+	Coniferaldehyde	Phenolic acids	Phenolic acids	20649-42-7	2	47440	44793	32482	31760	33939	38838	44761	36978	43095	66611	66880	75373	53397	79449	67310	30664	14229	11001	31685	50248	38106	55910	72155	49935	53193	44232	C02666	ko00940,ko01100,ko01110
pmb2795	177	145	178.063	C10H10O3	[M-H]-	4-Methoxycinnamic acid*	Phenolic acids	Phenolic acids	830-09-1	3	155220	231730	218230	158920	147420	196410	183180	175530	168470	317310	237660	411820	159280	235530	270360	375700	341430	328670	318590	336300	350730	382620	369580	405130	406940	389420	--	--
mws1200	177	145	178.063	C10H10O3	[M-H]-	Trans-4-Hydroxycinnamic Acid Methyl Ester	Phenolic acids	Phenolic acids	19367-38-5	1	135520	163480	170230	139740	140880	139540	141200	159770	121700	162520	136380	214880	109980	154580	211860	174940	161840	189620	133590	146420	151770	163480	162990	170250	160810	153460	--	--
Jmzn006005	177.06	117.04	178.063	C10H10O3	[M-H]-	3,4-methylenedioxy cinnamyl alcohol	Lignans and Coumarins	Lignans	58095-76-4	1	174790	231670	241640	194500	202280	210370	200080	213850	165730	251150	208840	281140	151480	201580	251650	251460	238070	237180	210820	196140	204380	221730	210360	235660	250350	224770	--	--
mws0981	178.04	136.02	179.044	C6H5N5O2	[M-H]-	Isoxanthopterin	Nucleotides and derivatives	Nucleotides and derivatives	529-69-1	1	2129.7	2829.7	3845	8928.7	5408.8	4271.2	5361	1744.9	4184.8	17578	16708	16478	19791	14263	9678	26338	13938	15807	14888	8005.1	10995	16544	16450	12246	13931	10297	C03975	--
pmb0786	180.09	163.06	179.079	C6H13NO5	[M+H]+	D-Glucosamine	Others	Saccharides and Alcohols	3416-24-8	3	654460	702630	758750	764000	732160	644040	560320	687890	615660	950260	735670	942390	872050	769960	1036200	925160	819180	860870	702830	902830	1025000	650800	455850	862760	1190900	639150	C00329	ko00520,ko01100
MWSmce001	181.05	107.05	180.042	C9H8O4	[M+H]+	5-Acetylsalicylic acid	Phenolic acids	Phenolic acids	13110-96-8	3	71864	34652	64148	60767	64438	51853	75830	77171	54062	47555	41692	28357	33700	32010	33612	41203	33321	65146	49461	50741	57193	48710	58379	65661	57251	56540	--	--
mws2212	179.03	135.05	180.042	C9H8O4	[M-H]-	Caffeic acid	Phenolic acids	Phenolic acids	331-39-5	1	359420	459280	576200	246750	303710	416390	307770	371980	354460	295330	242540	235880	330010	295780	312050	258410	227290	237790	288390	260370	261440	236730	221770	198020	212010	190020	C01197	ko00940,ko01100,ko01110
pmf0138	179.06	59	180.063	C6H12O6	[M-H]-	D-Mannose*	Others	Saccharides and Alcohols	3458-28-4	1	1158100	1866200	1439200	1253500	810920	2085100	996800	681390	1211900	945130	1098300	830330	1805200	1691600	1132300	1367800	1229000	1037200	1926500	2382800	2458600	2051000	2069900	2746500	2282400	2275400	C00159	ko00051,ko00052,ko00520,ko01100,ko02010
Hmln000297	179.05	59.01	180.063	C6H12O6	[M-H]-	Inositol*	Others	Saccharides and Alcohols	87-89-8	1	660870	1379100	1070700	937630	718560	944410	511550	308210	782150	735450	663120	1033300	700400	702080	687740	587260	580070	667760	1350400	1734700	1651100	1431600	1208400	1535700	1300200	1764000	C00137	ko00052,ko00053,ko00562,ko01100,ko01110,ko02010,ko04070
mws4170	179.06	59.01	180.063	C6H12O6	[M-H]-	D-Glucose*	Others	Saccharides and Alcohols	14431-43-7	1	702600	1315900	1310500	1328100	839090	771420	506730	422870	649470	617300	647130	922830	507440	814910	969540	926450	1024200	734220	1308800	1677300	1581300	1504500	1483500	981070	1493400	1643400	C00031	ko00010,ko00030,ko00052,ko00500,ko00520,ko00901,ko01100,ko01110,ko02010
mws1164	179.06	59.01	180.063	C6H12O6	[M-H]-	D-Fructose*	Others	Saccharides and Alcohols	7660-25-5	1	746670	1245700	1089500	1033300	842180	1409300	633250	400280	603390	672270	509620	761380	817220	982340	636050	977690	985840	770580	1294000	1386600	1030400	1539200	1757700	1723100	1344400	1290900	C05003	--
pmf0139	179.06	59	180.063	C6H12O6	[M-H]-	D-Galactose*	Others	Saccharides and Alcohols	59-23-4	1	551840	648820	594850	793990	706930	1075600	471590	518600	637520	837890	974910	763810	758000	988860	767480	1511000	856740	1063300	536130	603430	562760	573430	601590	565440	582650	708630	C00124	ko00052,ko01100
mws0663	181.07	124	180.065	C7H8N4O2	[M+H]+	1,7-Dimethylxanthine	Nucleotides and derivatives	Nucleotides and derivatives	611-59-6	3	453.9	5428.8	1347.8	566.47	2344.8	2248.5	1798.2	2007.2	1135.5	16226	12032	15226	8304.9	8098.5	12024	3828.4	1578	2020.2	7411.6	7691.7	9486	6086.7	5640.8	7196.1	10169	11296	C13747	ko00232,ko01100,ko01110
MWS2070	179.07	92.03	180.079	C10H12O3	[M-H]-	Propyl 4-hydroxybenzoate	Phenolic acids	Phenolic acids	94-13-3	3	6418.9	9533.5	10512	9157.9	9488.1	5736.6	8479	9407.1	10072	185970	152560	117320	43313	60486	125000	3483.5	6081	4644	38696	38593	42363	39384	37845	40917	40587	39298	--	--
Lmbn004847	179.07	146.04	180.079	C10H12O3	[M-H]-	4-Methoxyphenylpropionic acid	Phenolic acids	Phenolic acids	-	3	1750	4132	12247	5789.5	9997.2	6959	6445.8	7036.5	2935.2	6448.2	3482.5	9866.8	10392	4077.5	6401.5	1180	3441.2	2322.8	5816	8656	7502	7038.8	8732.8	6406.8	6934	6476.8	--	--
mws0093	179.07	146	180.079	C10H12O3	[M-H]-	Coniferyl alcohol	Phenolic acids	Phenolic acids	458-35-5	2	15753	30168	26897	18758	14079	27254	20470	24031	12327	26388	16067	35701	17202	25096	25889	15894	16270	13462	31167	38965	37064	40635	33490	27206	39184	36800	C00590	ko00940,ko00998,ko01100,ko01110
Cmyp007180	181.12	107.09	180.115	C11H16O2	[M+H]+	Dihydroactinidiolide	Others	Others	17092-92-1	1	863340	951940	863340	866920	922780	953150	966980	947730	801090	818410	697500	714260	1035800	926920	858040	635860	648670	649610	593430	611120	621360	639150	666290	615340	584160	623590	--	--
Hmcp009963	180.14	123.07	180.138	C11H18NO+	[M]+	Candicine	Alkaloids	Phenolamine	6656-13-9	1	211260	154290	162520	308010	258990	262830	131480	176860	197320	227290	205100	199110	368030	302790	274900	218110	220420	278930	174090	197920	193140	195080	191310	199260	188010	204700	C10575	--
mws0250	182.08	136.1	181.074	C9H11NO3	[M+H]+	L-Tyrosine	Amino acids and derivatives	Amino acids and derivatives	60-18-4	1	17497000	17047000	17546000	16066000	17701000	15865000	18697000	20940000	20298000	22789000	19543000	23054000	15585000	16185000	17004000	33188000	34013000	30171000	21765000	21853000	21564000	27323000	22323000	22371000	22335000	22066000	C00082	ko00130,ko00261,ko00350,ko00360,ko00400,ko00460,ko00730,ko00940,ko00950,ko00965,ko00966,ko00970,ko00998,ko01100,ko01110,ko01210,ko01230
Zmsp000878	182.08	136.08	181.074	C9H11NO3	[M+H]+	4-Hydroxy-5-(2-oxo-1-pyrrolidinyl)benzoic acid	Alkaloids	Pyrrole alkaloids	-	1	4658600	4357500	3949600	3747800	4180100	3830600	4668600	5721500	5292500	5865400	4714900	5504500	4132900	3950800	4089800	10537000	10302000	8421700	5184500	4913000	5240700	6723600	5559600	5063100	5468000	5318800	--	--
MWStz070	182.08	91.05	181.074	C9H11NO3	[M+H]+	N-(2-Hydroxy-4-methoxyphenyl)acetamide	Alkaloids	Phenolamine	58469-06-0	2	16181000	14950000	14787000	13082000	14676000	13552000	16206000	19095000	16925000	20352000	15512000	19725000	12949000	13654000	14161000	31210000	32346000	27895000	18132000	18199000	18401000	21919000	18301000	19391000	19277000	18580000	--	--
MWSmce455	181.05	107.01	182.058	C9H10O4	[M-H]-	Vanillic acid methyl ester	Phenolic acids	Phenolic acids	3943-74-6	3	19870	24308	22689	13012	13015	14055	8191.7	14984	24714	26709	19272	25702	18713	21308	23276	39328	24457	34703	35059	34991	32109	31152	39426	31619	33379	35544	--	--
pme2596	184.06	148	183.053	C8H9NO4	[M+H]+	4-Pyridoxic acid	Others	Vitamin	82-82-6	1	674140	532160	554920	513690	567600	548390	666600	579190	553380	435160	536960	474180	521730	420080	359840	563580	656260	537810	501160	489940	505410	532920	515490	519640	530050	512430	C00847	ko00750,ko01100
pmb1754	184	125	184.073	C5H15NO4P+	[M]+	O-Phosphocholine	Alkaloids	Alkaloids	107-73-3	3	909390	931490	1226700	807190	939300	930890	740590	751520	791030	1280000	900030	698700	1165900	1298100	1346600	126760	112790	136150	885480	802990	815590	851890	971160	877070	879470	932770	C00588	ko00564,ko01100
Zmgn000447	184.98	78.96	185.993	C3H7O7P	[M-H]-	3-Phospho-D-glyceric acid	Others	Saccharides and Alcohols	820-11-1	3	512410	232530	200130	192010	419010	221320	209190	417080	385650	1705900	1397300	684650	1755800	1560400	1876100	31946	27612	22994	486350	523950	533210	607800	608400	531520	622380	483300	C00197	ko00010,ko00030,ko00260,ko00270,ko00561,ko00630,ko00710,ko01100,ko01110,ko01200,ko01230
mws0752	185.15	185.16	186.162	C11H22O2	[M-H]-	Undecylic Acid	Lipids	Free fatty acids	112-37-8	1	417940	350060	431110	544980	522520	481200	375480	422820	446570	463740	382180	444750	532390	505280	464600	383790	381390	398210	375360	407760	405980	432580	457020	437510	362540	398830	C17715	--
Hmgp002327	188.07	118.06	187.063	C11H9O2N	[M+H]+	3-amino-2-naphthoic acid	Alkaloids	Alkaloids	-	1	6574400	6622300	7626400	5320800	6759000	6926800	8078500	9930000	7712900	12424000	7400100	16926000	5552000	5886900	5725800	36255000	36384000	25385000	14077000	12579000	13425000	13724000	13713000	14517000	14079000	14520000	--	--
Hmmp001310	188.07	118.07	187.063	C11H9NO2	[M+H]+	3-Indoleacrylic acid	Alkaloids	Plumerane	1204-06-4	3	6656900	5782000	7429500	5853500	5909400	6472900	8112300	9828800	8178900	11012000	7073200	17332000	5458100	5416000	5332000	35850000	34642000	23048000	13327000	12294000	12779000	11871000	13088000	13276000	13766000	13367000	C21283	--
pmn001492	187.1	123.1	188.041	C11H8O3	[M-H]-	Ayapin	Lignans and Coumarins	Coumarins	494-56-4	2	165200	160810	201170	139300	165050	160820	188280	180440	169130	175210	160050	163250	206350	143770	160150	133520	121990	150780	216830	205670	222140	228370	241280	227450	244890	240260	C18078	--
pme0137	187.07	125	188.08	C7H12N2O4	[M-H]-	N-Acetyl-L-Glutamine	Amino acids and derivatives	Amino acids and derivatives	2490-97-3	2	9514.4	20656	4154.2	9095.7	13334	14601	10224	12561	15948	6712.1	3858.8	8874.1	11028	12101	8294.5	36512	22800	24371	29656	28544	23268	20570	18564	26432	23693	13224	--	--
mws0237	187.1	125	188.105	C9H16O4	[M-H]-	Azelaic acid	Organic acids	Organic acids	123-99-9	1	2944600	3372500	3537400	2428200	2620300	2612800	3603400	2749100	2830500	3054700	2837600	2852700	3400900	2741000	2839100	2273100	2145400	2424100	4054100	4073300	4029500	4247900	4033700	4348400	4364400	4383000	C08261	--
pme0122	189.12	126	188.116	C8H16N2O3	[M+H]+	N6-Acetyl-L-lysine	Amino acids and derivatives	Amino acids and derivatives	692-04-6	1	23149	15136	18499	26342	21580	23254	24995	30621	40934	46509	44282	73661	52449	37989	52180	79168	97080	63472	53431	70759	67879	85273	47488	59309	72921	71174	C02727	ko00310,ko01100
mws5041	189.12	86.1	188.116	C8H16N2O3	[M+H]+	L-Glycyl-L-isoleucine*	Amino acids and derivatives	Amino acids and derivatives	19461-38-2	1	1889600	1951500	2192700	1301500	1393400	1522500	1596800	1547500	1684200	1237900	1156300	1157400	1059300	1043800	1022900	1257900	1273400	1211500	1610900	1609200	1676900	1689400	1786900	1855000	1795400	1854200	--	--
mws0736	189.12	86	188.116	C8H16N2O3	[M+H]+	N-Glycyl-L-leucine*	Amino acids and derivatives	Amino acids and derivatives	869-19-2	1	2462000	2610100	3072400	1802700	1844300	2094600	2092800	2215000	2291900	1574500	1540400	1507000	1331100	1331200	1353500	1641900	1717700	1635000	2124000	2213500	2152600	2224600	2395600	2501100	2473200	2505200	C02155	--
Zmjp000182	189.13	70.07	188.127	C7H16N4O2	[M+H]+	N-Monomethyl-L-arginine	Amino acids and derivatives	Amino acids and derivatives	17035-90-4	2	283020	324390	367760	219020	338210	265970	418530	674350	452820	582110	576710	942680	376180	414570	339480	2243500	2996900	2223100	608410	582950	598580	612490	612310	694300	690310	622420	C03884	--
pme3388	189.13	144	188.127	C7H16N4O2	[M+H]+	Homoarginine	Amino acids and derivatives	Amino acids and derivatives	156-86-5	3	20249	17415	21659	15269	21579	18096	12567	9299.6	17856	12840	30444	20765	15490	23846	14050	17197	18372	8586.8	6889.1	16878	16677	15962	10255	14978	2375.7	7116.2	C01924	--
pmf0348	187.13	97	188.141	C10H20O3	[M-H]-	2,6-Dimethyl-7-octene-2,3,6-triol	Others	Saccharides and Alcohols	73815-21-1	3	258220	251960	296070	196670	206080	201860	329950	202920	250110	244900	227760	195910	290790	213190	199530	205990	174380	196770	355380	342390	320930	319910	308310	377660	343430	360800	--	--
MWSslk080	187.13	141.13	188.141	C10H20O3	[M-H]-	10-Hydroxydecanoic acid	Lipids	Free fatty acids	1679-53-4	3	27183	38861	43832	18633	25402	25142	21001	48587	26053	28896	13037	12620	6782.2	11573	17078	1103.2	416.98	1374.4	25689	26466	21635	24384	26305	26271	29763	21305	C02774	--
Zmzp000145	189.16	84.08	188.152	C9H20N2O2	[M+H]+	Trimethyllysine	Amino acids and derivatives	Amino acids and derivatives	23284-33-5	3	1305300	1388700	1453800	788360	1106000	1259200	1107100	1474300	1007200	824170	1124200	946680	808880	1200900	680910	1252500	1757600	1312500	669520	1195900	738970	1034900	1202200	1236300	1035700	1089900	C03793	ko00310,ko01100
Zmtn001624	188.04	144.05	189.043	C10H7NO3	[M-H]-	N-Acetylisatin	Alkaloids	Plumerane	574-17-4	2	5305000	4799200	5980200	6240500	6021700	6912500	6291200	6768900	5333500	3440500	3400700	3674300	4747600	3606400	4495400	3870100	6760700	4781200	3980000	4033000	3942500	4763600	4059900	4298500	3973400	4102200	C02172	ko00380
pme0075	188.06	128	189.064	C7H11NO5	[M-H]-	N-Acetyl-L-glutamic acid	Amino acids and derivatives	Amino acids and derivatives	1188-37-0	1	1511500	1459100	1181500	855750	1238300	891940	1574900	1328800	1477200	1151700	943940	839110	878710	916440	974660	543940	534830	639830	654480	798940	861760	942830	813310	728390	829310	681660	C00624	ko00220,ko01100,ko01110,ko01210,ko01230
pme2244	190.09	118.07	189.07	C11H11NO2	[M+H]+	3-Indolepropionic acid	Alkaloids	Plumerane	830-96-6	1	211370	203370	209500	211210	205760	169060	156420	123260	139080	131740	143560	107420	175970	150870	156550	36765	62641	35012	89439	72587	100170	102100	90789	102330	93983	88028	--	--
mws0193	190.12	127	189.111	C7H15N3O3	[M+H]+	L-Homocitrulline	Amino acids and derivatives	Amino acids and derivatives	1190-49-4	3	19148	13239	11978	12627	15085	11013	9909.2	5715.7	10033	16575	17630	21824	11238	18438	15701	19037	32282	10897	11069	18449	18816	15612	28859	15942	18436	24754	C02427	--
pme0278	191.1	128	190.095	C7H14N2O4	[M+H]+	2,6-Diaminooimelic acid	Organic acids	Organic acids	583-93-7	3	135060	101300	190790	46837	49180	48941	436180	533910	315810	230120	347460	327210	56667	23044	29789	347290	672510	341400	142120	175470	187940	227900	209580	198040	197770	182390	C00666	ko00300,ko01100,ko01110,ko01230
mws0597	190.05	146	191.058	C10H9NO3	[M-H]-	5-Hydroxyindole-3-acetic acid	Alkaloids	Plumerane	54-16-0	1	58950	40930	43920	58907	60205	52942	46134	43743	41958	29057	33275	41804	53527	32028	34096	42944	57206	34505	31234	39704	39372	47061	31462	42775	35626	22861	C05635	ko00380,ko01100
MWSslk140	192.07	56.05	191.062	C7H13NO3S	[M+H]+	N-Acetyl-L-Methionine	Amino acids and derivatives	Amino acids and derivatives	65-82-7	3	77516	67666	70254	39788	39993	50468	56687	46800	73562	61383	69073	91220	40212	46766	50380	69893	83631	42793	62346	54794	58919	62386	75889	70288	73777	64338	C02712	--
Zmyn000453	191.02	111.01	192.027	C6H8O7	[M-H]-	Isocitric Acid	Organic acids	Organic acids	320-77-4	1	6219400	6548400	5760700	5038600	5866400	5594600	6948500	6830600	6640600	5831700	5204600	4517000	5291000	5972100	5467400	4212700	4175100	4424100	12433000	13324000	13720000	14017000	13725000	14236000	14309000	11783000	C00311	ko00020,ko00630,ko01100,ko01110,ko01200,ko01210,ko01230
mws0281	191.02	111.01	192.027	C6H8O7	[M-H]-	Citric Acid	Organic acids	Organic acids	77-92-9	1	3646900	2716400	2944200	3570300	3453300	2911800	3840500	3815200	4174100	2859900	3276800	2503900	3260300	2888200	2707700	2883700	2732100	3066000	6560400	7456200	8347000	7485600	7456400	7090800	7616500	6956300	C00158	ko00020,ko00250,ko00630,ko01100,ko01110,ko01200,ko01210,ko01230
pme2993	193.05	133	192.042	C10H8O4	[M+H]+	Scopoletin (7-Hydroxy-5-methoxycoumarin)	Lignans and Coumarins	Coumarins	92-61-5	3	18428	46869	63997	132580	36654	70085	55446	72023	59594	79849	108780	219030	41872	123500	154380	226830	154560	200460	89230	76931	78140	92980	91012	117090	106420	116780	C01752	ko00940,ko01110
Cmpp003619	193.05	105.07	192.042	C10H8O4	[M+H]+	6,7-Dihydroxy-4-methylcoumarin	Lignans and Coumarins	Coumarins	529-84-0	3	148950	134510	169280	135540	176830	131130	125530	136850	151070	105820	145510	113250	90996	142900	86119	120220	122060	190610	86197	101700	96552	124060	129920	135860	99275	137170	--	--
mws0277	191.06	85	192.063	C7H12O6	[M-H]-	Quinic Acid	Organic acids	Organic acids	77-95-2	2	1662100	1871600	1762300	1390100	1431400	1281500	1747300	1868900	1906100	1389400	1540000	1078000	1526300	1545300	1331100	939070	1317000	1246800	3630200	4158600	3880500	3958800	3999100	3966200	4074700	3373500	C00296	ko00400,ko01100
MWS0686	194.04	121.03	193.038	C9H7NO4	[M+H]+	5,6-Dihydroxy-1H-indole-2-carboxylic acid	Alkaloids	Plumerane	4790-08-3	3	5358.6	496.96	2458.5	8022.3	6038.5	14329	6076.1	729.56	15805	5180.6	4981.7	7483.3	10811	13681	6737.8	24391	20920	18054	8467.4	11862	8255.1	7725.4	12293	9655.1	11817	8734.8	C04185	ko00350,ko01100
pme2743	194.08	91	193.074	C10H11NO3	[M+H]+	N-Phenylacetylglycine	Amino acids and derivatives	Amino acids and derivatives	500-98-1	3	313710	213840	193020	155470	140510	133060	296540	368170	210550	86680	136850	152120	47888	68680	71583	294970	502480	240350	181260	168620	179140	233030	179570	198930	173120	182500	C05598	ko00360
mws1189	193.04	72.8	194.033	C6H10O7	[M-H]-	D-Galacturonic acid*	Organic acids	Organic acids	685-73-4	3	34269	30795	28054	16610	20812	18839	51764	34117	38128	30286	50675	34820	33584	52950	18281	113870	123660	109110	54394	38910	38780	42532	57690	64583	60522	47415	C00333	ko00040,ko00053,ko00520,ko01100,ko02010
pme3705	193.04	73	194.043	C6H10O7	[M-H]-	D-Glucoronic acid*	Others	Saccharides and Alcohols	6556-12-3	3	42190	37740	19428	27871	26174	25487	46297	49029	39342	53764	36329	36061	55901	40344	22229	116320	128710	116280	65285	54570	46743	61216	68319	62228	72650	52865	C00191	ko00040,ko00053,ko00520,ko00562,ko01100
MWSslk097	195.06	163.04	194.058	C10H10O4	[M+H]+	Dimethyl phthalate	Phenolic acids	Phenolic acids	131-11-3	3	67064	61716	68770	65455	83577	77056	65102	73655	60262	57630	68339	56707	82681	70185	55120	59568	49355	58458	46657	50435	49605	54491	57775	52185	52219	51992	C11233	--
MWSmce632	195.06	93.03	194.058	C10H10O4	[M+H]+	Vanillin acetate	Phenolic acids	Phenolic acids	881-68-5	2	609480	578430	696070	344960	507230	404770	609380	666100	765990	521500	465810	493860	478140	473580	603770	454780	362140	322250	512740	577390	603170	618300	674190	618180	646680	624250	--	--
Lmdn003756	193.05	135.05	194.058	C10H10O4	[M-H]-	Methyl caffeate	Phenolic acids	Phenolic acids	3843-74-1	3	3238.8	8595	11852	8359.5	5838	8082.8	5271.3	14583	12153	19292	18245	14362	8631.9	3919.4	12419	6997.2	12639	9748	13603	7099.6	12227	12380	8052.4	5782.3	12283	6241.6	C10477	--
pme0422	193.06	134	194.058	C10H10O4	[M-H]-	Isoferulic Acid*	Phenolic acids	Phenolic acids	537-73-5	1	1052100	654430	921690	313700	474010	387300	669360	572030	1086600	1133700	1194900	1134000	704370	1093000	1201500	1239400	1428800	1101900	1046300	1105600	1107200	1117900	1072800	1151000	1123900	1123600	C10470	--
mws0014	193.05	134.01	194.058	C10H10O4	[M-H]-	Ferulic acid*	Phenolic acids	Phenolic acids	537-98-4	1	17735000	14241000	15720000	6428200	10564000	6785200	12830000	10470000	17441000	20167000	18640000	20603000	13189000	20014000	22049000	21272000	21917000	20277000	17824000	17750000	19393000	19363000	21787000	18749000	18650000	17916000	C01494	ko00940,ko01100,ko01110
MWS1771	196.1	91.05	195.09	C10H13NO3	[M+H]+	L-Tyrosine methyl ester	Amino acids and derivatives	Amino acids and derivatives	1080-06-4	3	236230	239830	249450	218920	203980	244750	194010	251720	230370	254550	251390	269080	199770	244050	219570	249510	286700	175360	216950	199310	194830	209920	196320	211370	233350	224970	C03404	--
pme0534	195.05	74.9	196.058	C6H12O7	[M-H]-	Gluconic acid	Others	Saccharides and Alcohols	526-95-4	1	414780	473050	412200	338850	285970	402650	559270	448600	544150	334210	425550	379380	314700	337600	302580	554600	543900	581920	1087300	1317100	1078000	1115700	1211600	1204700	1329100	1181800	C00257	ko00030,ko01100,ko01110,ko01200
HJAP052	197.08	138.07	196.074	C10H12O4	[M+H]+	2,4,5-Trimethoxybenzaldehyde	Phenolic acids	Phenolic acids	4460-86-0	3	5865.6	2190.4	6232.8	9814.9	7966.9	5520.2	3123	4520.7	4620.2	3319.6	5086.1	3244.9	8257.5	9864.2	6231.4	3947.1	3716	7360.1	4637.8	4520.7	2861.1	4447.5	6438.5	5538.4	3321	4984.7	--	--
MWS20182	195.07	136.05	196.074	C10H12O4	[M-H]-	Dihydroferulic Acid	Phenolic acids	Phenolic acids	1135-23-5	2	71758	63090	79834	23168	43345	44188	52110	38561	67706	73695	87769	96328	50710	91158	99300	102240	97261	80116	73825	69338	84042	81944	84448	77937	68430	81236	--	--
MWSslk006	197.08	65.04	196.074	C10H12O4	[M+H]+	Ethyl Vanillate	Phenolic acids	Phenolic acids	617-05-0	3	27858	26681	39784	20687	27642	28066	19610	53233	41313	71491	52697	49683	19048	35321	52782	7818.9	6141.2	5760.7	34332	32461	32349	31407	33308	31231	34444	33719	--	--
mws0612	195.07	121	196.074	C10H12O4	[M-H]-	3,4-Dimethoxyphenyl acetic acid	Phenolic acids	Phenolic acids	93-40-3	3	16928	29710	22103	31840	32765	17534	31466	25800	26178	7853.8	9268	13095	2378	10742	4881.2	13645	5945	7701.2	6034.2	11519	10195	15255	15905	16412	7766.2	11663	--	--
Lmlp002205	197.12	161.1	196.109	C11H16O3	[M+H]+	Isololiolide	Terpenoids	Terpene	38274-00-9	3	131210	131130	135470	121020	145890	121310	163910	156220	128470	157390	119420	86976	156220	130010	142030	113480	122940	122550	129890	99858	122320	121540	119820	111540	119760	111460	--	--
pme3827	198.08	152.2	197.069	C9H11NO4	[M+H]+	3,4-Dihydroxy-L-phenylalanine (L-Dopa)	Amino acids and derivatives	Amino acids and derivatives	59-92-7	1	31582	23638	10955	26192	20577	38488	23539	39857	30490	41286	39278	93055	21013	30769	26021	1089500	534300	795190	51229	60867	106360	75150	60520	67469	70546	59678	C00355	ko00350,ko00950,ko00965,ko01100,ko01110
mws0027	197.05	123	198.053	C9H10O5	[M-H]-	Syringic acid	Phenolic acids	Phenolic acids	530-57-4	3	5646.2	6179.8	8600.2	7623.8	6864	9332.2	1799.8	8134.2	10108	13704	5400.5	4727	4951.2	8661.8	5318.2	14874	15550	9908.8	17905	22649	17340	15490	8957.2	20899	16368	22275	C10833	--
pmb2497	197	153	198.053	C9H10O5	[M-H]-	4-Hydroxy-3-methoxymandelate	Phenolic acids	Phenolic acids	55-10-7	3	286580	294640	313270	212520	275410	375830	148990	213120	234170	211720	240320	193780	428280	320210	245390	117380	109540	67736	318460	372590	232150	275250	285520	326700	268630	314660	C05584	ko00350,ko01100
Zmzn000079	199	78.96	200.009	C4H9O7P	[M-H]-	D-Erythrose-4-phosphate	Others	Saccharides and Alcohols	585-18-2	3	95303	76122	92665	64161	97112	103480	68124	53556	86798	75913	77167	55369	180090	112050	147780	21110	17870	24849	143740	142460	113300	131660	128920	122610	119650	101640	C00279	ko00030,ko00400,ko00710,ko00750,ko00998,ko01100,ko01110,ko01200,ko01230
pmb2640	199.17	199.17	200.178	C12H24O2	[M-H]-	Dodecanoic acid (Lauric acid)	Lipids	Free fatty acids	143-07-7	1	211400	162000	192390	317760	232800	201980	203950	196650	248130	461450	426690	363430	279880	269440	224330	219460	242670	241330	232240	229850	209320	244820	217870	247610	245400	239080	C02679	ko00061,ko01100,ko01110
pmb0130	203.12	144	202.111	C12H14N2O	[M+H]+	Acetryptine	Alkaloids	Plumerane	3551-18-6	3	13200	20307	18351	11380	10277	18461	18640	21512	15734	17674	19699	66752	5991.5	9475.5	10558	33405	42476	27848	349680	381250	411040	401800	396200	394620	382330	387390	--	--
pme0266	201.11	139	202.121	C10H18O4	[M-H]-	Sebacate	Organic acids	Organic acids	111-20-6	1	2053	3693.9	1678.6	2945.7	3565.8	3109.6	5451.5	4497.2	2705.5	63491	37803	38165	11749	23168	33509	1144.5	1206.1	1662.5	12227	10055	10057	10768	11375	11042	9308.1	12855	C08277	--
mws5037	203.14	86.1	202.132	C9H18N2O3	[M+H]+	L-Alanyl-L-leucine	Amino acids and derivatives	Amino acids and derivatives	3303-34-2	3	40246	30751	54315	50808	39933	51506	49262	55846	40346	52717	48698	22566	45720	42665	55215	49246	49951	37096	52243	62756	57509	50942	56644	70172	74662	48820	--	--
MWS1844	203.14	129.07	202.136	C14H18O	[M+H]+	2-Pentyl-3-phenyl-2-propenal	Others	Others	122-40-7	3	9584.7	10546	8823.2	9424.2	9903.5	8445.4	10984	8240.7	10911	8756.7	8222.3	7519	7151	9425.3	9311.8	9694.9	10625	12095	5276.6	6176.2	6041.9	5226.4	7545.1	4227.5	7161.6	4890.6	C12288	--
NK10251888	203.15	70.07	202.143	C8H18N4O2	[M+H]+	NG,NG-Dimethyl-L-arginine	Amino acids and derivatives	Amino acids and derivatives	30315-93-6	1	367080	377700	447510	306640	320600	370040	391420	416670	406730	465630	420830	473160	398280	402920	342310	580920	786230	633780	520110	531390	546460	556270	553890	560550	599800	562140	C03626	--
MWS5164	203.15	70.07	202.143	C8H18N4O2	[M+H]+	N,N'-Dimethylarginine;SDMA	Amino acids and derivatives	Amino acids and derivatives	30344-00-4	1	272600	293060	342120	249230	241320	298490	338500	316740	302810	350250	342780	384610	321120	314740	247620	475510	630220	543570	434030	383190	410180	386470	464500	504560	509850	493040	--	--
mws0018	203.22	83	202.216	C10H26N4	[M+H]+	Spermine	Alkaloids	Alkaloids	71-44-3	3	2798600	2229600	2372500	2841500	2603500	2193100	3373400	3134400	2983500	2498400	3254700	2298100	2618600	1914300	2177900	2324200	3065800	2439800	4546000	4080400	4110600	4353500	5025800	4889200	5372200	5710900	C00750	ko00330,ko00410,ko00480,ko00770,ko01100
mws0282	203.08	116.05	204.09	C11H12N2O2	[M-H]-	L-Tryptophan	Amino acids and derivatives	Amino acids and derivatives	73-22-3	1	5599400	5286800	6212200	4589500	4723000	5387500	6110500	7249100	6630500	8731100	5743000	11889000	4685700	4333300	4612000	22448000	21137000	15998000	9797400	10192000	10221000	8961100	9077000	9733800	9662100	9616800	C00078	ko00260,ko00380,ko00400,ko00901,ko00966,ko00970,ko00998,ko01100,ko01110,ko01210,ko01230
Zmbp002538	205.1	146.06	204.09	C11H12N2O2	[M+H]+	1-Methoxy-indole-3-acetamide	Alkaloids	Plumerane	-	1	16675000	16172000	18156000	13599000	15851000	17633000	17639000	24482000	20699000	29616000	19281000	40719000	15220000	15160000	15603000	64226000	60578000	53073000	31420000	32208000	33689000	31370000	34731000	35063000	34049000	34767000	--	--
pmb0818	206.1	147.5	205.074	C11H11NO3	[M+H]+	Methoxyindoleacetic acid	Alkaloids	Plumerane	3471-31-6	3	172910	192770	222070	169560	171240	179860	213140	255180	233520	389110	233730	468190	179720	153840	155900	1225900	1131200	728890	384900	369670	372050	332130	377310	408570	422090	444620	C05660	ko00380
Lmyp003025	206.08	146.06	205.074	C11H11NO3	[M+H]+	Coixlactam	Alkaloids	Quinoline alkaloids	-	2	32698	20454	12961	16751	21901	36041	24547	25568	32538	31307	48208	32292	55662	47364	28664	110870	106960	82556	51748	38523	51829	36860	56350	64856	73159	42521	--	--
MWS0618	204.12	71.05	205.131	C9H19NO4	[M-H]-	Pantothenol	Others	Saccharides and Alcohols	16485-10-2	3	64520	62853	62321	57332	76712	48206	87907	78103	87966	75469	86743	65753	74987	73549	89070	52582	56527	53549	60482	57053	69924	70637	77190	58311	70561	58937	C05944	ko00770
pmp001236	207.07	121.1	206.058	C11H10O4	[M+H]+	Clove chromone	Others	Others	-	2	10387	9121.4	7651.5	6088.2	5716.6	3509.5	8549.6	2862	7710.2	16326	23476	18733	13509	16215	14981	13116	17482	13064	10874	8876.2	13061	9176.7	10721	14047	19468	12275	--	--
MWSmce577	207.1	161.06	206.094	C12H14O3	[M+H]+	Ethyl p-methoxycinnamate	Phenolic acids	Phenolic acids	24393-56-4	3	55713	44375	49336	122360	63182	57890	35783	56587	71916	65546	50696	44245	94672	99423	56447	50889	51195	43516	46612	48194	51962	50491	49002	52405	58469	50102	--	--
pmb1587	207.14	165.2	206.131	C13H18O2	[M+H]+	4-Hydroxy-3,5-diisopropylbenzaldehyde	Phenolic acids	Phenolic acids	10537-86-7	3	30837	31952	27016	29271	36795	32226	39756	35828	34213	40701	30625	33475	43384	39124	32952	26646	38131	28030	26284	27161	29295	28807	26351	27352	30704	29254	--	--
Lmbn013410	205.16	189.13	206.167	C14H22O	[M-H]-	2,4-Di-Tert-Butylphenol	Phenolic acids	Phenolic acids	96-76-4	1	171580	145910	163670	182440	189330	185740	152240	163030	158880	158800	186210	210180	173990	168700	192480	153360	169340	199190	125660	119150	106710	132860	152090	121230	117250	131410	--	--
Zmgn002106	206.08	58.03	207.09	C11H13NO3	[M-H]-	N-Acetyl-L-phenylalanine	Amino acids and derivatives	Amino acids and derivatives	2018-61-3	2	80204	104860	119790	94058	48060	112320	90528	259120	122700	108550	85282	123080	49402	65733	70736	225480	289490	306800	516150	631660	633700	581330	582740	543270	595700	600240	C03519	ko00360,ko01100
MA10107783	207.03	119.05	208.037	C10H8O5	[M-H]-	3-[(1-Carboxyvinyl)oxy]benzoic acid	Phenolic acids	Phenolic acids	16929-37-6	2	14513	12246	22896	18686	19671	20088	20862	34184	67350	209230	171940	211250	97059	177780	133720	206470	191970	181450	95719	94819	108810	90048	111150	107460	114200	90473	C20772	ko00130,ko01110
mws1014	209.04	149.1	208.037	C10H8O5	[M+H]+	Fraxetin (7,8-Dihydroxy-6-methoxycoumarin)	Lignans and Coumarins	Coumarins	574-84-5	3	49638	42960	34282	13291	11682	41420	24176	88926	129330	96176	155250	177500	226730	246000	140690	151530	190180	173710	166650	156280	77404	191420	108120	176710	122440	90655	C09265	--
pmb2620	207.07	133.1	208.074	C11H12O4	[M-H]-	3,4-Dimethoxycinnamic acid	Phenolic acids	Phenolic acids	14737-89-4	1	527900	704990	556610	388480	497270	480530	510770	443660	631150	1867500	1518900	2154600	988350	2208100	2678200	1277000	1682400	1123700	1745200	1811100	1941200	2051900	1998800	2200400	2176500	2079700	--	--
pme3443	207.07	192	208.074	C11H12O4	[M-H]-	Sinapinaldehyde	Phenolic acids	Phenolic acids	4206-58-0	1	12209	11404	16215	10730	10506	5891.3	6286.3	16033	10135	8486.5	10116	17795	12050	1913.9	28681	10816	15777	9325.6	674360	606370	697100	658570	665370	743230	643420	592500	C05610	ko00940,ko01100,ko01110
mws2184	207.07	135.1	208.074	C11H12O4	[M-H]-	Ethyl caffeate	Phenolic acids	Phenolic acids	102-37-4	3	6805.2	8903.1	13599	6504	25132	12608	10965	8687.9	4794.7	7775.2	4993.8	3801.8	8803.4	3418.8	14285	12693	8870.7	11977	7364.8	8402	7297.9	9039.6	9762.9	8555.3	6745.3	9665.9	--	--
MWSmce083	207.07	133.03	208.074	C11H12O4	[M-H]-	Ferulic acid methyl ester	Phenolic acids	Phenolic acids	2309-07-1	1	1137100	1561600	1252500	900810	1134500	1059200	1074900	1034400	1335500	4046500	3494200	4546400	2246200	4444800	5889800	2814400	3640600	2388900	3810000	4193400	4194800	4437500	4444000	4611000	4650400	4645000	--	--
Lmsn000954	207.09	59.01	208.095	C8H16O6	[M-H]-	Dambonitol	Others	Saccharides and Alcohols	523-94-4	3	26413	18843	22960	18697	20611	31820	18698	16299	31852	41919	33305	35987	17600	25676	16758	24971	31308	50637	10311	30622	26402	32326	29504	26040	41305	19837	--	--
Zmyn000108	209.03	85.03	210.038	C6H10O8	[M-H]-	D-Saccharic acid*	Others	Saccharides and Alcohols	87-73-0	1	610340	583280	632700	600980	455380	615690	699270	642810	651590	712350	663810	729560	632370	623640	617560	760540	919810	913070	934880	927130	956810	842720	802100	1024800	977660	924790	C00818	ko00053,ko01100
Zmpn000199	209.03	85.03	210.038	C6H10O8	[M-H]-	D-Galactaric acid*	Others	Saccharides and Alcohols	526-99-8	1	718240	591670	577350	563470	483660	636430	649970	569760	639880	712600	638750	711280	648590	728360	694320	831850	1015400	1160800	891880	1012300	894180	881180	1013000	897390	760960	1076300	C00879	ko00053,ko01100
Hmcn000192	209.07	59.01	210.073	C7H14O7	[M-H]-	Sedoheptulose	Others	Saccharides and Alcohols	3019-74-7	1	218270	234400	203790	291800	276730	386810	273510	285670	293570	367860	354240	345880	329840	304440	276390	259820	380860	360550	354030	345610	362320	377350	355770	339230	395340	415280	C02076	ko00710,ko01100
mws0853	209.08	179	210.089	C11H14O4	[M-H]-	Sinapyl alcohol	Phenolic acids	Phenolic acids	537-33-7	3	2867.8	2817.2	5698.2	2236.8	1719.2	3404.8	2287	2318.8	1703.5	2832	2258	4013.5	1135.5	3429	2870.8	5197.2	4570.5	1132	17132	13129	19918	22218	17841	19320	22921	15213	C02325	ko00940,ko01100,ko01110
Lmbn004790	209.08	179.03	210.089	C11H14O4	[M-H]-	Methyl 3-(3-hydroxy-4-methoxyphenyl)propanoate	Phenolic acids	Phenolic acids	129150-61-4	3	1135.5	3956.8	2319.2	1677.8	567.75	2831.8	1142.5	4574.8	2264.2	3946.2	564.5	6759	1710.5	880.75	2854.8	3430	5724.2	3408.5	8006	14764	15057	6877	10751	9016	6792	13272	--	--
MWStz261	211.14	70.07	210.137	C11H18N2O2	[M+H]+	Cyclo(D-Leu-L-Pro)	Amino acids and derivatives	Amino acids and derivatives	36238-67-2	3	19868	17516	14417	5978	8904	11284	16038	9498	6058.5	8311.5	12582	10614	5947.5	6549.2	13085	8356	7147	9547	11324	13675	21362	15572	12510	23167	20785	8952.5	--	--
Hmlp008487	211.17	81.07	210.161	C13H22O2	[M+H]+	Blumenol C	Terpenoids	Terpene	36151-02-7	3	55701	61987	46642	72359	63332	58439	51975	54300	53369	50226	72938	72261	71879	72484	59665	62074	56139	38650	51680	58353	71057	56594	67646	56027	41830	72122	--	--
pme1675	210.03	78.9	211.036	C4H10N3O5P	[M-H]-	Creatine Phosphate	Organic acids	Organic acids	67-07-2	3	18074	11651	12003	13601	19367	9905.8	17497	13116	15709	6870.1	14142	8571.9	13745	9457.7	7445.3	948.58	2151.6	2880.5	4295.9	9049.9	9977.6	14548	10257	7580.9	5142.3	8500.6	C02305	ko00330,ko01100
mws0863	213.02	97	214.024	C5H11O7P	[M-H]-	2-Deoxyribose-5'-phosphate	Nucleotides and derivatives	Nucleotides and derivatives	102916-66-5	3	11989	12417	14555	12867	12818	11191	13098	7922.1	19091	10262	17931	12514	16712	22599	16884	12891	12287	13404	38536	23271	27894	25562	25281	32766	39499	30313	C00673	ko00030,ko01100
pmb2507	213.1	97	214.024	C5H11O7P	[M-H]-	2-Deoxyribose-1-phosphate	Nucleotides and derivatives	Nucleotides and derivatives	17210-42-3	3	155620	116480	134610	47651	95468	91120	187990	174670	214940	125600	200750	162030	104730	169910	108310	104340	99143	173250	360670	302830	423560	367700	293260	243060	493570	300820	C00672	ko00030,ko00240,ko01100
mws0751	213.19	195	214.193	C13H26O2	[M-H]-	Tridecanoic Acid	Lipids	Free fatty acids	638-53-9	1	3028.2	781.83	2703.1	1545.9	1475.5	875.22	1596.4	3055.9	2605.3	1698.1	1495.7	1030.8	2466	2292.3	1737.4	1245.8	2684.3	782.49	2237	1894.9	1373.7	2465.6	2428.6	2133.9	2153.6	2706.2	C17076	--
pmb2873	214.1	134	215.095	C13H13NO2	[M-H]-	3-(2-Naphthyl)-L-alanine	Amino acids and derivatives	Amino acids and derivatives	58438-03-2	3	49774	64968	68605	98554	140520	65577	69293	73248	74906	45758	51812	34676	84212	48861	88701	82248	60849	73535	165950	191830	196520	174370	200710	194890	160390	185530	--	--
pme0170	217.13	158	216.122	C8H16N4O3	[M+H]+	N-Acetyl-L-Arginine	Amino acids and derivatives	Amino acids and derivatives	155-84-0	3	22098	27718	27809	25035	17412	22545	40809	39729	31010	19902	25124	39116	20959	21692	25942	48884	64159	54006	29521	24139	31386	35738	31988	44655	37519	35088	--	--
MWS1900	215.13	153.13	216.136	C11H20O4	[M-H]-	Undecanedioic acid	Lipids	Free fatty acids	1852-04-6	1	54937	55175	63302	55372	53916	53548	63098	69114	70818	95840	77633	65678	93512	52143	72377	40925	38061	45288	85647	83465	87387	87781	92625	90941	94571	94864	--	--
mws5045	215.17	169.16	216.173	C12H24O3	[M-H]-	12-Hydroxydodecanoic acid	Lipids	Free fatty acids	505-95-3	1	4331.3	3847.1	6975	2703.1	3348.4	5244.7	3002.7	6496.2	4161.4	13861	6968.8	5649.4	6178.4	4020.1	7233.6	2040.5	2018	3691.3	6891.6	7476.2	6348.7	7178.9	6447.4	7207.3	6874.6	6570.6	C08317	--
mws0677	219.11	160	218.106	C12H14N2O2	[M+H]+	N-Acetyl-5-hydroxytryptamine	Alkaloids	Plumerane	1210-83-9	3	361290	382780	371430	335850	254730	292770	292090	368000	341660	294600	312170	359970	252280	312370	321220	321340	470870	246870	240830	228760	273440	241200	274390	227990	223180	324970	C00978	ko00380,ko01100
mws1337	220.12	202.1	219.111	C9H17NO5	[M+H]+	D-Pantothenic Acid	Others	Vitamin	79-83-4	1	6270600	5879000	7034500	6566900	6783100	6950600	6732200	6636700	5718000	5045900	6018700	4624000	5294300	5091600	5311600	5415400	5609700	5149400	6198000	5891400	6663600	6599100	6840500	6674500	7048600	6548800	C00864	ko00410,ko00770,ko01100,ko01110
MWS2073	218.96	160.96	219.969	C8H6Cl2O3	[M-H]-	2,4-Dichlorophenoxyacetic Acid	Organic acids	Organic acids	94-75-7	3	40453	40674	44730	57134	54812	66308	37886	38114	39477	44865	33134	51624	50683	40488	30487	38824	60048	36599	22391	19645	20693	21552	23476	19637	24134	20376	C03664	--
pme1228	221.09	204	220.085	C11H12N2O3	[M+H]+	5-Hydroxy-L-tryptophan	Amino acids and derivatives	Amino acids and derivatives	56-69-9	3	101840	103860	121630	104660	99057	105170	130740	138490	129330	159920	176530	259450	93596	106670	101760	425790	375910	275550	148850	131570	145460	137920	151270	157010	162170	151970	C00643	ko00380,ko01100
Hmyp002656	222.08	130.06	221.068	C11H11NO4	[M+H]+	Methyl dioxindole-3-acetate	Others	Others	57061-18-4	2	32544	18459	24784	24519	24225	26037	20324	26560	36024	53266	50227	58561	86981	57072	74601	36840	36260	50660	45736	45587	54808	42238	55998	42118	52780	45610	--	--
mws2608	222.1	84.05	221.09	C8H15NO6	[M+H]+	N-Acetyl-D-galactosamine	Others	Saccharides and Alcohols	1811-31-0	3	83045	277580	79479	79247	93852	77286	66687	109740	102080	87760	70933	61741	104100	94531	87525	38233	43596	44020	97586	79518	91346	75468	94376	95630	90778	89819	C01132	ko00052,ko01100
mws4174	222.1	138	221.09	C8H15NO6	[M+H]+	N-Acetyl-D-mannosamine	Others	Saccharides and Alcohols	7772-94-3	3	192720	585150	165410	192020	214060	161980	242370	161950	175430	143490	159050	138740	164730	159080	186020	85221	112570	117710	192380	162520	180300	177780	190530	194160	179990	174450	C00645	ko00520,ko01100
pme2755	222	144	221.09	C8H15NO6	[M+H]+	N-Acetyl-D-glucosamine	Others	Saccharides and Alcohols	7512-17-6	3	46895	38580	40659	43572	46649	41410	57839	46338	47459	49253	48244	43799	41654	29788	35502	49829	58694	41352	69589	64390	64459	77650	66188	91929	81681	88320	C00140	ko00520,ko01100,ko02010
mws1639	223.06	190	222.053	C11H10O5	[M+H]+	Isofraxidin	Lignans and Coumarins	Coumarins	486-21-5	2	7839.6	9413.9	4406.4	6946.2	1470	5861.6	3436.4	4894.8	7898.1	8241.2	7421	15099	7817.7	11959	20108	8437.3	34131	9841.6	18582	15628	16186	15380	14269	16137	24549	14788	C17480	--
MWS4296	223.11	120.08	222.1	C11H14N2O3	[M+H]+	Glycylphenylalanine	Amino acids and derivatives	Amino acids and derivatives	3321-03-7	1	1206400	1076600	1245900	695900	800530	834050	1141300	943200	999810	617040	604810	701520	538500	486690	539520	746320	746770	669150	827550	924610	961440	993590	914160	1089700	1077400	1037400	--	--
mws5042	223.11	120.09	222.1	C11H14N2O3	[M+H]+	L-Glycyl-L-phenylalanine	Amino acids and derivatives	Amino acids and derivatives	721-66-4	1	1151000	1067500	1317200	762300	812950	773070	1044700	1118600	1149800	670180	599850	712820	560470	430490	614870	666860	776750	638680	887460	928230	987280	1039900	1072100	1101400	1036800	1056800	--	--
mws0520	224.09	136	223.084	C11H13NO4	[M+H]+	N-Acetyl-L-tyrosine	Amino acids and derivatives	Amino acids and derivatives	537-55-3	3	189320	278970	195180	266940	200570	247340	346460	335820	422410	249690	368890	416830	152480	281860	161640	406470	466320	363250	272020	285310	292560	287820	301860	289840	300530	289970	--	--
Zmln002252	223.03	149.03	224.032	C10H8O6	[M-H]-	Sideretin (5,7,8-Trihydroxy-6-methoxycoumarin)	Lignans and Coumarins	Coumarins	-	3	87288	87671	78346	29496	53944	48844	57870	64158	64782	55783	66132	86102	46600	53325	62357	83215	132540	97950	73408	51878	71183	82800	84998	75141	62694	64814	C22007	--
mws4085	223.06	193	224.068	C11H12O5	[M-H]-	Sinapic acid	Phenolic acids	Phenolic acids	530-59-6	2	73700	73825	94892	37566	27225	48322	58756	51506	62041	48035	46768	69562	60416	57432	60392	101110	125030	87930	83016	68068	64810	72928	63961	79130	81950	64233	C00482	ko00940,ko01100,ko01110
Cmsp002787	227.09	181.05	226.084	C11H14O5	[M+H]+	3,4'-Dihydroxy-3',5'-dimethoxypropiophenone	Phenolic acids	Phenolic acids	136196-47-9	2	73843	73986	72268	63757	58284	65272	43073	62575	38417	102380	81047	106150	57462	88670	91345	44046	71058	84061	72669	57354	50586	62953	61685	74480	82165	57292	--	--
MWStz170	227.14	86.06	226.132	C11H18N2O3	[M+H]+	Cyclo(L-Leu-trans-4-hydroxy-L-Pro)	Amino acids and derivatives	Amino acids and derivatives	115006-86-5	3	16051	14231	6908	13708	11853	16294	15038	15487	19142	19567	22567	17619	12282	16505	19716	21637	22968	24321	12744	11930	11768	11053	18089	18783	11022	25106	--	--
pmb2643	225.19	207	226.193	C14H26O2	[M-H]-	Myristoleic acid	Lipids	Free fatty acids	544-64-9	1	2308.1	2922.9	4087.3	6706.6	5922.6	6073.9	10481	15991	13957	5163.9	7207.1	3191.8	8175.7	3852.4	5234.4	4289.7	2285.2	2127.6	10503	10905	11564	13518	10713	9299.1	10662	11987	C08322	--
pme1194	228.1	112	227.091	C9H13N3O4	[M+H]+	2'-Deoxycytidine	Nucleotides and derivatives	Nucleotides and derivatives	951-77-9	2	125520	126260	125600	84253	66277	74678	106410	147930	102280	83499	92988	169880	53144	79648	100260	64987	78625	65566	118530	110110	113600	110510	124410	129890	120430	135700	C00881	ko00240,ko01100,ko02010
mws0119	227.2	227.2	228.209	C14H28O2	[M-H]-	Myristic Acid	Lipids	Free fatty acids	544-63-8	1	13090000	9554800	11451000	16288000	17028000	12732000	19031000	21275000	20129000	33631000	28429000	30865000	12406000	14993000	13867000	12905000	9594800	15536000	24024000	23449000	23730000	24271000	22243000	24045000	24400000	25220000	C06424	ko00061,ko01100
pma6455	229.01	96.97	230.02	C5H11O8P	[M-H]-	Ribulose-5-phosphate	Others	Saccharides and Alcohols	4300-28-1	3	74983	65549	106660	76068	93196	84542	84852	72328	159450	77569	92190	48248	164820	78266	124320	1456.5	1131.2	3008.2	74313	51512	39365	69323	53706	45668	49067	48016	C00117	ko00030,ko00230,ko00440,ko00710,ko00750,ko01100,ko01110,ko01200,ko01230
Cmsn005615	229.09	123.04	230.094	C14H14O3	[M-H]-	3,3',5-Trihydroxybibenzyl	Phenolic acids	Phenolic acids	86630-23-1	2	5471.5	5146.9	14180	3567.6	4442.6	4631.8	4250.8	5341.4	4196.5	10819	9213.5	5054.4	9928.4	4528.4	7197	2410.3	497.64	4037.4	6693.5	5980.1	5237.3	8220.7	8067.5	5056.6	7375.6	5144.8	--	--
mws0474	229.14	211	230.152	C12H22O4	[M-H]-	Dodecanedioic aicd	Lipids	Free fatty acids	693-23-2	1	7099.4	5071.8	8256.5	4132	5958.4	5726.2	6262.3	3568.7	5596.3	10230	11054	6743.4	11985	9818	9866.8	4203.8	3655.2	4943.4	6019.6	5063.4	5151.8	5104.9	6243.8	5054.9	5535.3	5479.4	C02678	--
pmb0962	235.1	118.3	234.158	C10H22N2O4	[M+H]+	L-Lysine-Butanoic Acid	Amino acids and derivatives	Amino acids and derivatives	80407-71-2	3	1993000	2803100	4049400	3936800	2456900	2769500	4412400	5328600	3775700	2338000	2657900	3598600	1028200	2501200	2580900	4778000	5655700	5715300	5226000	2933600	3741400	4097400	3552400	4310800	4079100	4828600	--	--
mws4176	237.12	120.09	236.116	C12H16N2O3	[M+H]+	L-Alanyl-L-Phenylalanine	Amino acids and derivatives	Amino acids and derivatives	3061-90-3	1	903230	915310	1013700	710490	753020	829000	644910	643130	739420	645900	619660	623780	771140	837800	756190	718720	715530	670350	667210	657850	760560	726260	811700	803350	796070	840080	--	--
Jmbn003202	235.12	59.01	236.126	C10H20O6	[M-H]-	Butyl Beta-D-Fructoside	Others	Others	67884-27-9	2	73286	59907	49031	53688	58633	48983	57766	60550	57078	59245	44982	40495	50119	56484	38523	44992	64293	43910	52681	54176	37893	41330	39678	51606	50323	46905	--	--
Lmyn000160	237.06	87.01	238.069	C8H14O8	[M-H]-	Mucic acid Dimethyl Ester	Phenolic acids	Phenolic acids	-	2	155970	146490	122470	142220	138360	133220	250130	190940	161280	137210	170780	117100	170400	136860	156120	155420	224220	187510	219600	268830	220330	249920	229070	243150	234820	233540	--	--
pmn001669	237.08	147	238.084	C12H14O5	[M-H]-	Methyl sinapate	Phenolic acids	Phenolic acids	20733-94-2	3	2566.5	4596.3	3684.2	2857.8	2692.9	2701.8	3306.5	2817	3071	17670	20451	23898	11606	19295	30929	10847	15863	6631.5	18030	21593	18561	20266	24129	23364	25462	25368	--	--
Zmdn011161	239.07	223.03	240.079	C15H12O3	[M-H]-	Chrysophanol-9-anthrone	Quinones	Anthraquinone	491-58-7	2	93381	106050	128780	175410	113980	148840	110550	109980	151380	119290	114270	132840	90047	136160	103840	141670	44585	142680	123830	135370	116110	150510	139370	151610	147850	154970	C10314	--
MWS0552	239.2	223.03	240.209	C15H28O2	[M-H]-	Cis-10-Pentadecenoic Acid(C15: 1)	Lipids	Free fatty acids	84743-29-3	2	108350	105100	103170	166650	161590	130570	136140	100070	151600	105880	106390	115060	97829	133940	115720	118510	54807	159110	124010	146470	144490	127980	130130	132970	152060	155480	--	--
pme2827	239	223	240.245	C16H32O	[M-H]-	Palmitaldehyde	Lipids	Free fatty acids	629-80-1	3	7683200	7355400	6751100	5881600	7471700	7190600	6318300	5142900	5893500	6997500	7787300	7769800	7998200	7996600	6993100	6098800	6354100	8437500	3052000	3263000	3710300	3763600	3920300	4034300	4119500	3852300	C00517	ko00071
MWS2910	242.11	126.07	241.106	C10H15N3O4	[M+H]+	5-Methyl-2'-Deoxycytidine	Nucleotides and derivatives	Nucleotides and derivatives	838-07-3	3	9311.6	8739.1	4844.4	3422.3	8934.3	6579.6	5882.6	9587.1	5911.7	9031.9	6402.4	3002.6	5854.2	7270.2	2162.6	7818.4	6369.9	5902.8	13245	11465	13052	12600	15501	19261	14508	18645	C03592	--
mws1383	243.09	145	242.08	C12H10N4O2	[M+H]+	Lumichrome	Alkaloids	Alkaloids	1086-80-2	3	228700	211430	212390	324430	274510	230290	279560	413500	205670	167060	76834	39861	66630	81995	166310	33829	35944	37487	59908	58325	52428	67737	59064	64665	61927	65284	C01727	ko00740
pme0264	243.1	127	242.09	C10H14N2O5	[M+H]+	Thymidine	Nucleotides and derivatives	Nucleotides and derivatives	50-89-5	1	234420	232810	268050	146010	190470	159390	226640	325810	275600	268300	273040	371590	182120	246930	261100	212110	200280	148870	298440	277070	299710	330160	308310	319090	291940	309390	C00214	ko00240,ko01100
MWS2430	241.22	241.21	242.225	C15H30O2	[M-H]-	13-methylmyristic acid	Lipids	Free fatty acids	2485-71-4	1	78925	73692	87350	117980	193360	175760	343780	413140	348900	102020	127360	123210	182040	159000	118190	73967	83400	81671	303870	323090	318850	330520	305580	328140	355780	351040	--	--
mws0359	241.22	241.22	242.225	C15H30O2	[M-H]-	Pentadecanoic Acid	Lipids	Free fatty acids	1002-84-2	1	162150	108630	175740	254760	213060	234260	403250	554350	380430	245040	215780	209270	305550	171860	178490	121730	123980	144370	373860	359390	460660	517440	419850	495720	410900	517300	C16537	--
ML10180524	244.09	112.05	243.086	C9H13N3O5	[M+H]+	Cytarabine	Nucleotides and derivatives	Nucleotides and derivatives	147-94-4	1	2773700	4199000	3885800	2953500	2002200	3215100	3833200	3849900	3493600	3102900	3206500	5248900	1996500	2521600	3062600	13639000	12990000	11330000	3860900	4098500	4293000	5187200	4487500	4926100	4660300	4639900	C02961	--
pme3732	244.09	112	243.086	C9H13N3O5	[M+H]+	Cytidine	Nucleotides and derivatives	Nucleotides and derivatives	65-46-3	1	1539800	2213200	2012500	1717200	1423400	1725900	2868500	2250100	2277800	1550100	1801100	2339100	1013400	1368900	1604400	6336900	6272200	6064600	3482100	3029500	2833900	3111300	3759500	3919200	3674500	3614000	C00475	ko00240,ko01100,ko02010
MWSmce295	245.07	113.03	244.07	C9H12N2O6	[M+H]+	1-beta-D-Arabinofuranosyluracil	Nucleotides and derivatives	Nucleotides and derivatives	3083-77-0	2	1584000	1762900	1892200	1612300	1435100	1335100	2005100	1603800	1807400	1599200	1779900	1892800	1472300	1623400	2095700	1281700	1291600	1444500	1635100	1677100	1867200	1856100	1948800	1979800	1762800	1732500	C16908	--
mws0248	243.06	110	244.07	C9H12N2O6	[M-H]-	Uridine	Nucleotides and derivatives	Nucleotides and derivatives	58-96-8	1	3038500	3248100	2827100	2187000	2412900	2085000	3481300	3123300	3146400	3047700	2805500	2352700	2602100	3037600	2980700	3536900	3358600	3091800	2269400	2639200	3099200	3284400	3271000	2793000	3108400	2454900	C00299	ko00240,ko01100,ko02010
mws0976	243.06	153	244.07	C9H12N2O6	[M-H]-	β-Pseudouridine	Nucleotides and derivatives	Nucleotides and derivatives	1445-07-4	3	138360	146400	126580	139890	125130	149650	199330	139380	184100	170460	142820	162520	136600	161560	152890	225380	214230	218770	166080	159250	180950	211040	175930	150610	211120	238490	C02067	ko00240,ko01100
pme2266	245.1	227	244.088	C10H16N2O3S	[M+H]+	Biotin	Others	Vitamin	58-85-5	2	322370	273300	361380	232250	289430	226870	277480	232340	253210	243730	215140	145370	369680	281070	318490	76537	101140	126770	179950	166290	212790	192560	170090	191960	198150	205900	C00120	ko00780,ko01100,ko02010
Lmmn005696	243.1	228.08	244.11	C15H16O3	[M-H]-	Desoxyhemigossypol	Phenolic acids	Phenolic acids	57765-65-8	3	12715	10210	12196	23257	19070	15283	10667	13610	13314	12264	10287	9943	12155	10893	11663	9124.3	9099.2	6577.1	14803	8796.1	8811	10646	11455	10306	11453	12392	--	--
MWStz205	245.13	120.08	244.121	C14H16N2O2	[M+H]+	Cyclo(D-Phe-L-Pro)	Amino acids and derivatives	Amino acids and derivatives	26488-24-4	3	3088.8	1765.7	3134	3065.6	4348.1	4844.1	4872.2	2235.8	5318.8	11881	3993	10110	7843.3	6156.1	6587.9	2605.7	10447	6576.2	6625.1	6156.4	6161.2	6205.4	6100.2	9731.4	9740.5	3567.1	--	--
MWStz255	245.13	120.08	244.121	C14H16N2O2	[M+H]+	Cyclo(Pro-Phe)	Amino acids and derivatives	Amino acids and derivatives	3705-26-8	3	2328.6	2758.2	5647.1	468.65	949.3	918.12	2745.8	5111.7	2337.8	10592	5539.8	461.82	7833.7	7797.1	6406.8	6899	10172	4603.2	6002.8	5526.4	5473.9	12528	5530.7	8726.5	6929.2	4198.4	C11847	--
MWS5231	243.16	181.16	244.167	C13H24O4	[M-H]-	Tridecanedioic acid	Lipids	Free fatty acids	505-52-2	2	81148	86739	89718	86261	88039	83191	85489	85300	92004	101250	96230	92737	92752	96940	100470	86474	97137	92087	109410	113820	106720	115000	109650	113920	118600	116070	--	--
Lmhp002031	245.18	86.1	245.186	C12H24N2O3	[M+H]+	L-Leucyl-L-Leucine	Amino acids and derivatives	Amino acids and derivatives	3303-31-9	3	2400800	2789600	3064800	2370700	2221000	2652200	1889900	2345700	1957500	1677100	1502300	1653900	1772300	1795500	1896700	2088600	2138700	2032800	2455400	2587900	2517100	2372500	2534300	2515700	2638900	2346300	--	--
pmb2591	245.09	203.2	246.1	C13H14N2O3	[M-H]-	N-Acetyl-L-Tryptophan	Amino acids and derivatives	Amino acids and derivatives	1218-34-4	1	10969000	10423000	11940000	10289000	4491900	13362000	8351500	19251000	15924000	17943000	23434000	27685000	9808900	11377000	14707000	39995000	41755000	37559000	20636000	25396000	22783000	27292000	27554000	24134000	25191000	23349000	--	--
mws0124	247.11	130	246.1	C13H14N2O3	[M+H]+	N-(3-Indolylacetyl)-L-alanine	Amino acids and derivatives	Amino acids and derivatives	57105-39-2	2	15131	26812	33570	20714	9485.8	25106	15140	35620	9603.8	53479	15641	132230	10569	14362	49217	4419.5	21011	8869	81316	69542	80300	74302	88314	77541	97080	69422	--	--
Lmrj002087	247.13	86.09	246.121	C10H18N2O5	[M+H]+	L-Isoleucyl-L-Aspartate	Amino acids and derivatives	Amino acids and derivatives	-	1	668950	581150	747720	415660	439210	467110	447030	446370	596880	317450	273760	339300	303290	229990	264950	415740	399830	338280	563390	573520	598040	598480	653520	683950	607240	627590	--	--
mws0655	246.02	96.9	247.025	C8H10NO6P	[M-H]-	Pyridoxal-5'-phosphate	Others	Vitamin	54-47-7	3	68938	58247	58761	30425	22547	30312	34651	56128	121440	183160	262760	274870	180000	188890	85670	78347	97800	41841	47257	60479	38552	49048	41214	45452	50417	43610	C00018	ko00730,ko00750,ko01100
MWSmce116	252.1	136.06	251.102	C10H13N5O3	[M+H]+	5'-Deoxyadenosine	Nucleotides and derivatives	Nucleotides and derivatives	4754-39-6	2	124280	142810	118300	123810	106770	93155	117820	168340	188580	128190	178400	182110	96502	157280	142320	98545	83222	97050	92764	75465	82230	88677	95990	105310	95372	78571	C05198	--
pme3961	252.11	136	251.102	C10H13N5O3	[M+H]+	2'-Deoxyadenosine	Nucleotides and derivatives	Nucleotides and derivatives	958-09-8	1	1519900	1840500	1994900	1218900	1229800	1391200	1553600	1845900	1844200	1410500	1474600	2008000	1282100	1311300	1460100	1139000	1701200	1189900	1495400	1479600	1585700	1605000	1734100	1786000	1727500	1735800	C00559	ko00230,ko01100,ko02010
pme2776	253.09	137	252.086	C10H12N4O4	[M+H]+	2'-Deoxyinosine	Nucleotides and derivatives	Nucleotides and derivatives	890-38-0	3	118210	133290	141480	85136	81463	97675	108830	135340	125380	101880	100120	140430	91551	91533	94824	73259	109440	86194	89718	95059	117030	108240	107110	120820	129140	128750	C05512	ko00230,ko01100,ko02010
Lmhn003373	253.04	137.02	254.043	C11H10O7	[M-H]-	p-Hydroxybenzoylmalic acid	Phenolic acids	Phenolic acids	-	3	354400	540590	574570	309600	375590	301600	317750	454960	673860	586170	447600	613700	499380	467080	529030	698500	1522300	526890	462680	475340	481880	533230	511960	541880	488950	563020	--	--
MWSHY0071	255.06	153.02	254.058	C15H10O4	[M+H]+	Chrysin	Flavonoids	Flavonoid	480-40-0	1	5012	2787	1389.8	2811.9	2246	5723.6	868.01	2849.4	2521.5	5469.7	820.77	2538.4	1304.3	5124.1	1470.9	425.49	4021	2635.7	14615	13273	9859.9	11008	16652	11512	13772	11434	C10028	ko00941
Hmbp003234	255.09	163.03	254.079	C12H14O6	[M+H]+	1-O-Caffeoylglycerol	Lipids	Glycerol ester	-	3	18914	18949	26346	25862	10250	51187	51278	45666	24564	51264	56154	71105	26600	66364	10353	148440	125160	256740	27987	55330	45594	45715	34379	80046	46467	61415	--	--
mws0361	253.22	235.19	254.225	C16H30O2	[M-H]-	Palmitoleic Acid	Lipids	Free fatty acids	373-49-9	1	12131	8712.8	18201	28239	41877	47335	73688	77211	71240	15565	30265	17817	34986	21273	20985	5760.3	6953.1	5679.1	70237	65380	60754	62403	64420	67971	60732	75883	C08362	ko00061
Zmdn006929	255.07	213.06	256.074	C15H12O4	[M-H]-	Aloe-Emodin-9-Anthrone	Quinones	Anthraquinone	6247-99-0	2	33467	50809	37374	16867	23041	84116	9932.1	46516	16588	210170	39493	28225	12117	33910	14776	14648	67429	76204	215790	221620	220780	239820	233660	228210	223720	233710	C16760	--
MWSHY0124	257.08	153.02	256.074	C15H12O4	[M+H]+	Pinocembrin (Dihydrochrysin)	Flavonoids	Dihydroflavone	480-39-7	1	55116	94801	64498	28416	41269	131400	15712	92308	34755	430490	75028	47415	27591	57450	33877	36712	125750	138280	401290	450630	401130	407830	468860	482850	461550	460230	C09827	ko00941
pma3101	256.2	124.1	256.082	C11H14NO6+	[M+H]+	Nicotinate D-ribonucleoside	Others	Vitamin	17720-18-2	3	1076800	1365500	1390800	1131300	874770	1242700	1758300	1256900	1175500	1180100	1354300	1438500	813560	848950	866400	2066600	2105200	1824100	1452300	1422000	1693200	1577200	1642800	1754100	1749200	1586100	C05841	ko00760,ko01100
MWS1888	255.09	93.03	256.095	C12H16O6	[M-H]-	Phenyl-beta-D-glucoside	Phenolic acids	Phenolic acids	1464-44-4	3	22872	22008	25232	24239	21077	24881	26974	24901	32747	12064	10931	12325	14336	14419	22296	19520	15675	22304	18221	16630	7767.4	21719	17340	14205	18371	17578	C11611	--
mws1488	255.23	237.22	256.24	C16H32O2	[M-H]-	Palmitic acid	Lipids	Free fatty acids	57-10-3	1	15382	14730	12568	9466.8	15903	14824	18302	15623	15631	12915	11690	12235	11365	13506	17859	6855.5	14119	12739	13191	14772	13441	16188	9483.8	9933.9	17201	16840	C00249	ko00061,ko00062,ko00071,ko00073,ko01040,ko01100,ko01212
mws0120	258.11	104.11	257.103	C8H20NO6P	[M+H]+	Choline Alfoscerate	Lipids	PC	28319-77-9	1	95297	110970	171750	67281	140470	48031	92502	41828	133010	32872	11879	13860	168460	107210	141070	20832	22003	13409	97465	96757	112890	130120	148710	99218	103460	106330	C00670	ko00564,ko00565
pme1187	257.08	124	258.085	C10H14N2O6	[M-H]-	5-Methyluridine	Nucleotides and derivatives	Nucleotides and derivatives	1463-10-1	3	5694.5	4972	7423.6	4805.9	3077.2	5621.2	8198.2	5269	5598.3	4009.4	6267.7	5292.5	3042.6	373.97	2038.6	6558	7930.4	2512.9	7958	7516.3	7082.9	2884.3	7183.2	9859	5086.7	4897.4	--	--
MWSslk133	257.18	195.18	258.183	C14H26O4	[M-H]-	1,14-Tetradecanedioic Acid	Lipids	Free fatty acids	821-38-5	3	29486	29204	29411	29025	26477	26804	25999	25134	33080	30227	31682	27628	28346	31511	29475	26641	25787	26288	31268	32603	36969	32360	36952	31199	35316	31073	--	--
Zmyn000110	258.04	78.96	259.046	C6H14NO8P	[M-H]-	D-Glucosamine 1-phosphate	Others	Saccharides and Alcohols	2152-75-2	3	27641	14529	13178	10380	14561	15634	12416	3708.5	15599	6039.6	7813	3011.6	51084	8652.4	20973	4700.1	10404	6111.7	29108	33650	30190	29324	29155	32694	31586	35516	C06156	ko00520,ko01100
mws1090	259.02	97	260.03	C6H13O9P	[M-H]-	Glucose-1-phosphate*	Others	Saccharides and Alcohols	59-56-3	1	2469700	1620000	1707600	1252100	2300300	1207500	2233700	2413000	3054300	2909400	3012800	1805500	4642600	2490800	3056000	123590	192230	238250	2170100	2227500	2292600	2398200	2335000	2514700	2438500	2237000	C00103	ko00010,ko00040,ko00052,ko00500,ko00520,ko00523,ko00561,ko01100,ko01110
mws0866	259.02	97	260.03	C6H13O9P	[M-H]-	D-Glucose 6-phosphate*	Others	Saccharides and Alcohols	56-73-5	1	2680700	1542300	1516200	1243300	2348400	1258300	2341000	2560600	3190200	2956900	3062300	1787300	4818000	2576700	3346100	109340	173970	274250	2237600	2258800	2295100	2152800	2452300	2415800	2371400	2503400	C00092	ko00500,ko00562,ko00998,ko01100,ko01110
MWS2442	259.02	96.97	260.03	C6H13O9P	[M-H]-	D-Fructose 6-Phosphate	Others	Saccharides and Alcohols	643-13-0	1	1499700	950860	1000200	776280	1271100	792190	1427300	1401300	1883400	1677900	1738200	1097400	2873900	1573100	1910000	64756	116440	154990	1270800	1343000	1241200	1331400	1328800	1504500	1358000	1464600	C00085	ko00052,ko00500,ko00710,ko01100,ko01110,ko01200
Lmmn007256	259.1	231.04	260.105	C15H16O4	[M-H]-	Hemigossypol	Terpenoids	Sesquiterpenoids	40817-07-0	2	27350	23391	27244	25205	23888	20829	26024	23572	24849	23413	25081	24862	24014	26033	25886	23475	23707	22161	23305	22434	23193	23822	22917	22564	22705	20877	C09680	--
MWS4309	262.12	188.07	261.111	C13H15N3O3	[M+H]+	Glycyl-tryptophan	Amino acids and derivatives	Amino acids and derivatives	2390-74-1	3	127720	151650	174110	103970	107850	135770	149160	148750	177250	131390	130990	209100	107330	112220	109950	277280	247300	205780	154470	165080	169980	145950	163540	175690	170580	150700	--	--
Zmpn000095	261.04	78.96	262.045	C6H15O9P	[M-H]-	Sorbitol-6-phosphate	Others	Saccharides and Alcohols	20479-58-7	3	25769	18554	9241	15075	10575	12480	18813	30230	21056	28468	29848	19856	41666	33339	29336	5334.5	1087.5	6610	19838	13938	17594	17128	22472	13152	18006	16200	C01096	ko00051,ko01100
mws0715	263.1	145	264.111	C13H16N2O4	[M-H]-	Phenylacetyl-L-glutamine	Amino acids and derivatives	Amino acids and derivatives	28047-15-6	1	43452	63556	46820	70436	54001	67016	49732	61690	56206	10921	5686.7	13395	13700	8647.2	16436	15260	9515.4	38369	47692	39333	48571	57490	42728	29280	37169	40051	C04148	ko00360
Lmlp003161	265.15	177.06	264.147	C14H20N2O3	[M+H]+	N-Feruloylputrescine	Alkaloids	Phenolamine	501-13-3	2	19723	1492.2	10629	3624.7	12364	4337.6	30060	18914	23037	10247	10255	27696	6392.1	1665.5	9260	19535	67345	13800	46687	44763	20312	42122	35917	47773	37253	44622	C10497	ko00330,ko01100
pme1184	268.1	152	267.097	C10H13N5O4	[M+H]+	2'-Deoxyguanosine	Nucleotides and derivatives	Nucleotides and derivatives	961-07-9	1	450240	470060	496890	301170	303820	342510	443700	534980	475540	396720	401780	742980	376940	387190	404340	343040	374540	264350	635380	588460	622640	606860	634030	671310	640390	674630	C00330	ko00230,ko01100,ko02010
pme0230	268.1	136.06	267.097	C10H13N5O4	[M+H]+	Adenosine	Nucleotides and derivatives	Nucleotides and derivatives	58-61-7	1	17604000	20317000	20238000	17260000	14255000	18511000	21018000	21338000	20496000	14591000	18561000	17945000	15260000	16522000	16807000	5330100	12419000	9590900	12668000	12635000	13003000	12597000	13687000	13206000	13961000	13724000	C00212	ko00230,ko01100,ko02010
pma2172	268.13	121	267.126	C17H17NO2	[M+H]+	Cinnamoyltyramine	Alkaloids	Phenolamine	20384-14-9	3	558.9	9027.2	826.63	1291.2	1936.6	6080.4	729.82	8754.1	834.94	6203.4	4558.4	66103	4105.8	17981	9055.2	30532	58753	555.61	1187800	1211500	1317400	1325800	1266500	1278900	1230900	1287300	--	--
pme2890	269.06	136	268.055	C8H16N2O4S2	[M+H]+	L-Homocystine	Amino acids and derivatives	Amino acids and derivatives	626-72-2	2	51390	74546	67436	48864	52985	49569	33808	37083	36309	43072	76781	41350	46405	48068	47651	62121	27212	89066	179410	69975	188410	108330	167610	212640	195950	168070	C01817	ko00270
mws1060	267.07	135	268.081	C10H12N4O5	[M-H]-	9-(Arabinosyl)hypoxanthine	Nucleotides and derivatives	Nucleotides and derivatives	7013-16-3	1	2436200	3261100	3561700	1705300	1545600	2005600	1348100	3505900	2566900	4028600	2841000	2770500	1445500	2282700	3488500	759940	833700	678540	1669800	1943700	1636500	1986800	1800700	1821900	1799300	1696900	--	--
pme1119	269.09	137	268.081	C10H12N4O5	[M+H]+	Inosine	Nucleotides and derivatives	Nucleotides and derivatives	58-63-9	3	547580	595460	548910	279890	247140	345790	261690	395560	450190	595700	558590	433340	301520	373860	541240	98919	210420	330680	699790	503480	583300	517130	696550	717360	724510	780660	C00294	ko00230,ko01100,ko02010
pmp000087	269.1	177.05	268.095	C13H16O6	[M+H]+	2-Feruloyl-sn-glycerol	Phenolic acids	Phenolic acids	-	1	1412600	1646700	2379400	3959200	2041300	2826600	3437000	3370700	3727900	6831300	7362700	9582700	3532800	5506100	2845900	17337000	14127000	16061000	4858800	4972900	3875500	5151300	2154100	6218800	3560100	3980600	--	--
pmp000086	269.1	177.05	268.095	C13H16O6	[M+H]+	1-Feruloyl-sn-glycerol	Phenolic acids	Phenolic acids	-	2	1598100	2265600	2295800	4304500	2344800	2962500	3479200	4210400	3915400	5303800	7187000	11211000	2859500	6704600	2132100	13326000	13500000	17161000	4842800	3649900	4784800	5308000	3904400	5515900	3819700	4001100	--	--
mws0383	267.23	267.23	268.24	C17H32O2	[M-H]-	10-Heptadecenoic Acid	Lipids	Free fatty acids	29743-97-3	1	558140	490760	606010	996070	877280	1150000	1828300	2189300	1640300	650270	649460	431780	1071700	707870	661520	399930	461970	335490	1849100	1434800	1346900	1722900	1231600	1286100	1121800	1523200	--	--
mws1659	269.05	225	270.053	C15H10O5	[M-H]-	Emodin	Quinones	Anthraquinone	518-82-1	2	262.38	37.36	224.96	224.52	262.46	335.88	112.68	164.16	75.32	896.1	75.08	52.62	412.54	131.32	131.16	111.62	261.8	2117.6	2001.9	787.86	1013.8	1350.6	2287.2	1941.8	1476.3	1762.7	C10343	--
Zmdn007764	269.05	225	270.053	C15H10O5	[M-H]-	isoemodin	Quinones	Anthraquinone	-	2	287.5	287.77	300.82	161.88	246.52	493.28	81.51	243.02	534.55	571.71	241.51	283.75	204.11	81.475	121.76	543.37	143.07	100.99	1724.9	2151.5	2114.4	2916	2404	1494.7	2852.2	2470.7	--	--
mws1175	271.1	167.04	270.089	C16H14O4	[M+H]+	Pinostrobin	Flavonoids	Dihydroflavone	480-37-5	3	73656	74763	42506	21853	28702	127180	12582	74009	29268	540540	68241	48633	18574	61769	20062	29505	119100	144480	58546	66811	59140	62828	72499	63676	63618	71770	C16419	ko00941
mws1297	269.1	101.02	270.11	C13H18O6	[M-H]-	Benzyl glucoside	Phenolic acids	Phenolic acids	4304-12-5	1	58632	67095	65073	52062	60593	57316	45850	48416	53283	27853	28619	27924	25728	25085	19572	70773	82590	51889	35215	46483	35891	39158	34182	40259	42471	40986	--	--
MWS20159	271.12	91.05	270.11	C13H18O6	[M+H]+	Phenyl-β-D-glucoside	Others	Others	-	3	61481	86006	72723	95315	80432	81840	70709	70317	62425	25464	27423	22536	22102	18857	32594	43099	36402	29132	38384	28732	38598	32956	34022	26219	36664	35991	--	--
pme0376	271.06	151	272.068	C15H12O5	[M-H]-	Naringenin (5,7,4'-Trihydroxyflavanone)*	Flavonoids	Dihydroflavone	480-41-1	2	63525	85294	79809	66032	53273	77629	62987	69717	75633	79320	64000	93721	49006	67531	78759	133710	104820	111620	61928	68503	70540	63774	65612	69351	71276	71540	C00509	ko00941,ko00943,ko01100,ko01110
pme2960	273.08	153	272.068	C15H12O5	[M+H]+	Naringenin chalcone*	Flavonoids	Chalcones	73692-50-9	2	57584	73748	69239	54933	45917	70291	55676	55171	69667	70065	66363	87864	40974	65742	61669	122480	107780	100490	59882	57945	66889	56544	64940	70932	63638	58493	C06561	ko00941,ko01100,ko01110
mws0914	271.06	151	272.068	C15H12O5	[M-H]-	Pinobanksin*	Flavonoids	Dihydroflavonol	548-82-3	2	51857	79875	67642	57062	39946	67647	56691	57911	71145	62960	61876	73983	40293	61396	63203	111390	100530	88573	61242	57448	58183	62468	64558	61153	62753	58882	C09826	ko00941
MWSmce675	271.08	108.02	272.09	C12H16O7	[M-H]-	Arbutin	Others	Others	84380-01-8	1	347940	362110	382290	417630	437500	441610	463150	492940	391850	537430	486730	493210	560050	572710	466480	904910	797550	859030	352950	367540	360690	420450	447040	389500	385110	364850	--	--
Lmmn003323	271.23	225.22	272.235	C16H32O3	[M-H]-	2-Hydroxyhexadecanoic acid	Organic acids	Organic acids	764-67-0	2	321820	263300	336020	256980	265220	263770	753500	751220	788450	314200	349140	332990	316790	222200	248600	249170	264990	196010	663960	722910	670600	686970	717650	735830	731510	768790	--	--
MWSslk154	277.13	115.04	276.121	C12H20O7	[M+H]+	Triethyl citrate	Organic acids	Organic acids	77-93-0	3	33777	35076	32057	36350	41731	35927	23738	26866	29700	62474	51643	53186	38665	45468	32658	28726	23509	27642	21691	23647	23020	30678	26681	28396	27420	25474	--	--
pmb1574	277.2	93	276.209	C18H28O2	[M+H]+	9,12-Octadecadien-6-Ynoic Acid	Lipids	Free fatty acids	61481-29-6	3	587490	737500	1547000	370520	436090	435920	802330	436040	683940	327300	299910	469690	329630	390010	378400	413840	493850	345530	1433200	1463000	1481000	1493900	1458600	1473600	1484000	1531500	--	--
mws1038	277.12	146	278.13	C11H22N2O4S	[M-H]-	Pantetheine	Others	Others	496-65-1	1	5419.7	3234.6	7637.4	8695.3	5407.6	15087	11836	7257.1	11618	3655.7	7031.2	7611.8	1627.8	8022	724.18	30885	48366	23678	32180	44169	31470	34189	37738	25955	23126	41312	C00831	ko00332,ko00770,ko01110
Lmxp011770	279.16	149.02	278.152	C16H22O4	[M+H]+	Diisobutyl phthalate*	Phenolic acids	Phenolic acids	84-69-5	1	31980000	32573000	31839000	32336000	36479000	35055000	26959000	26714000	30528000	34285000	36897000	33599000	48172000	38338000	31120000	30361000	27791000	36655000	22087000	24855000	23717000	24725000	26918000	24709000	26187000	25171000	C15205	--
MWSmce341	279.16	149.03	278.152	C16H22O4	[M+H]+	Butyl isobutyl phthalate	Phenolic acids	Phenolic acids	17851-53-5	2	32329000	34736000	32055000	33167000	35959000	35070000	27339000	29132000	31943000	36305000	35980000	34962000	50929000	37484000	32099000	31897000	28296000	37857000	23432000	23783000	26183000	25102000	25751000	26295000	25867000	26462000	--	--
Lmlp012720	279.16	149.02	278.152	C16H22O4	[M+H]+	Dibutyl phthalate*	Phenolic acids	Phenolic acids	84-74-2	1	30687000	33768000	32310000	33099000	36232000	36050000	26432000	29240000	31605000	32624000	35496000	35789000	48322000	35704000	31518000	31307000	26901000	38610000	23524000	23856000	25054000	24427000	26259000	25123000	24604000	25048000	C14214	--
mws5035	279.17	120.08	278.163	C15H22N2O3	[M+H]+	L-Leucyl-L-phenylalanine	Amino acids and derivatives	Amino acids and derivatives	56217-82-4	1	1059700	1337600	1320600	1339500	1228400	1487600	852090	1171500	1108400	958660	671900	927620	1105400	1176900	1203200	1409200	1358900	1293100	1157100	1198900	1228300	1283800	1378400	1342700	1404200	1338100	--	--
Lmbn005923	277.22	59.01	278.225	C18H30O2	[M-H]-	Crepenynic acid	Lipids	Free fatty acids	2277-31-8	1	328770	342340	345310	347840	327240	330440	457140	309690	407220	299720	352860	294940	344360	339120	307210	289070	211540	383890	363800	348740	355050	382680	371110	364630	375530	397100	C07289	ko00591
pmb1650	279.2	149.4	278.225	C18H30O2	[M+H]+	Octadeca-11E,13E,15Z-trienoic acid	Lipids	Free fatty acids	25575-00-2	3	10108000	11076000	9869700	10980000	11934000	12047000	8304500	9222800	9932000	10735000	11823000	11355000	17116000	12345000	10083000	9971500	8449000	12370000	6970900	7586800	8125600	7775300	7664500	7962900	8410500	7480800	--	--
MWSmce692	277.22	59.01	278.225	C18H30O2	[M-H]-	γ-Linolenic Acid	Lipids	Free fatty acids	506-26-3	1	328280	334440	353040	355780	326480	324770	434840	304580	419360	281160	348130	304540	315410	327380	297540	277920	214960	380100	357130	348940	368210	372940	362800	361910	354450	395660	C06426	ko00591,ko01040,ko01100
pmb0889	279.23	95.1	278.225	C18H30O2	[M+H]+	Punicic acid (9Z,11E,13Z-octadecatrienoic acid)	Lipids	Free fatty acids	544-72-9	1	4429800	4649800	5084200	3040600	3647300	2752300	5742600	4247300	4930100	1787000	2578900	2342500	2781300	2848200	2644600	3684500	3443900	4101400	7557000	7943700	8187400	7953100	8435800	8496000	7752700	8323900	C08364	--
mws0367	277.22	277.22	278.225	C18H30O2	[M-H]-	α-Linolenic Acid	Lipids	Free fatty acids	463-40-1	1	16515000	16784000	16451000	16838000	15979000	15847000	20342000	15554000	18766000	13269000	17299000	15124000	15675000	17107000	14592000	13922000	9574300	17719000	16571000	17137000	17155000	18230000	17830000	18135000	17069000	19152000	C06427	ko00592,ko01040,ko01100,ko01110
Lmhn002926	279.05	163.04	280.058	C13H12O7	[M-H]-	p-Coumaroylmalic acid	Phenolic acids	Phenolic acids	-	2	4705900	4370300	5205200	4529800	4824400	5533300	5383500	5106100	4847500	4300100	4454500	4173400	4435100	4279400	4107700	3908000	3935800	4086800	3495300	3737100	3596500	3371600	3606900	3690900	3418900	3602200	--	--
mws0629	281.11	166	280.106	C13H16N2O5	[M+H]+	L-Aspartyl-L-Phenylalanine	Amino acids and derivatives	Amino acids and derivatives	13433-09-5	1	326520	343620	392720	277130	262520	320400	299040	287030	300800	178200	197240	208810	174080	184940	209470	249340	257700	209000	314230	325910	318530	309090	342470	340450	330000	320230	--	--
Lmbp010382	281.12	91.05	280.11	C18H16O3	[M+H]+	6-Methoxy-2-(2-phenylethyl)chromone	Others	Others	84294-89-3	3	17612	18088	18005	8205.8	18422	14023	18968	18295	23514	19116	20355	21565	24982	25036	10688	14474	12063	24110	32651	37224	36579	39747	46712	40048	42458	40132	--	--
pmp001245	280.15	221.08	280.138	C15H22NO4+	[M]+	Feruloylcholine	Alkaloids	Phenolamine	85927-25-9	1	378080	402430	309040	411670	392370	386940	1837100	586400	834320	574080	2392900	1172700	735820	568370	626070	2509900	6365700	3418600	735160	802140	721480	710780	725160	789430	880130	767980	--	--
mws1491	279.23	279.23	280.24	C18H32O2	[M-H]-	Linoleic acid	Lipids	Free fatty acids	60-33-3	1	31449000	30731000	34920000	27420000	25488000	24331000	33307000	27414000	31631000	20149000	29990000	26054000	26114000	25990000	26327000	23247000	25972000	24801000	31520000	35275000	34227000	39824000	32985000	39225000	33525000	35272000	C01595	ko00591,ko01040,ko01100
Lmbn006152	279.23	59.01	280.24	C18H32O2	[M-H]-	(9Z,11E)-Octadecadienoic acid	Lipids	Free fatty acids	2540-56-9	1	20770	19649	20849	15741	16249	17793	23117	18180	18560	14337	15020	14935	15862	15859	15262	13564	16282	12410	16015	23426	21040	22704	22497	20743	21317	25522	C04056	ko00591
MWS4354	282.12	150.08	281.112	C11H15N5O4	[M+H]+	N6-methyladenosine	Nucleotides and derivatives	Nucleotides and derivatives	1867-73-8	1	155220	247870	244700	234730	121770	255410	153940	211030	177630	188740	162300	220510	93865	106620	131120	1280800	1269000	1083600	332540	390710	388000	354150	407240	355600	420920	439550	--	--
Hmhp001812	282.12	136.06	281.112	C11H15N5O4	[M+H]+	2'-O-Methyladenosine	Nucleotides and derivatives	Nucleotides and derivatives	2140-79-6	1	162420	212970	212350	199250	117990	186430	157450	217580	204740	240430	250660	313650	127610	143490	116200	869030	767900	787610	451680	471940	427670	468280	493980	501740	491240	502110	--	--
YC512118	282.28	247.24	281.272	C18H35NO	[M+H]+	Oleamide (9-Octadecenamide)	Lipids	Free fatty acids	301-02-0	1	9753.6	6499.5	7767.8	21459	12271	9400.9	12722	12547	9616.7	6281.7	8676	7221.8	6913	7228	6715.3	5875.6	6379.6	7508.6	10081	11053	11299	10373	12053	10276	9957.6	9956.4	C19670	--
Lmcp005230	283.1	163.04	282.089	C17H14O4	[M+H]+	6-Hydroxy-2-[2-(4-hydroxyphenyl)ethyl]chromone	Others	Others	-	3	5918.1	14975	6727.8	13230	9471	9261.7	4605.9	7209	10935	40512	32155	38854	23107	38468	39037	15673	14275	16180	17399	17109	16201	17288	22139	20682	19022	19581	--	--
Lmyn012331	281.25	281.25	282.256	C18H34O2	[M-H]-	Petroselinic acid	Lipids	Free fatty acids	593-39-5	2	4563500	3560100	3407500	2742700	3506300	3263500	5531300	4010400	4459400	3149100	3008500	2983900	3229900	3321000	3305400	2100200	2520100	2383300	3942800	4336800	3974900	5662200	3960500	3484700	4390800	6108700	C08363	--
mws2623	281.25	281.25	282.256	C18H34O2	[M-H]-	11-Octadecanoic acid(Vaccenic acid)	Lipids	Free fatty acids	506-17-2	1	4883900	3846500	4195000	3831300	4452100	3370000	6337500	5001900	5249700	3757300	3765400	3278300	3286000	3475700	3455200	2431500	2685800	2982300	5128200	5354900	4645800	6491300	4710700	3759100	5363200	7035400	C21944	--
pme1178	284.1	152	283.092	C10H13N5O5	[M+H]+	Guanosine	Nucleotides and derivatives	Nucleotides and derivatives	118-00-3	1	45072000	49304000	48537000	42566000	35264000	44106000	46892000	52264000	50672000	45999000	51304000	55797000	39006000	41981000	38866000	65193000	74173000	65799000	40816000	38972000	41628000	42139000	42533000	46568000	43984000	45712000	C00387	ko00230,ko01100,ko02010
Hmqp002567	284.13	147.04	283.12	C17H17NO3	[M+H]+	P-Hydroxycinnamic acid p-hydroxyphenethylamine	Phenolic acids	Phenolic acids	-	1	9352	17307	11455	6335	7428.2	8782.8	4796.1	31592	30953	23520	58989	684300	58780	27189	535850	1413100	3833200	50460	1077200	1072600	1127400	1232500	1105500	1147500	1092700	1136000	--	--
MWSmce089	284.12	147.04	283.121	C17H17NO3	[M+H]+	p-Coumaroyltyramine	Lignans and Coumarins	Coumarins	36417-86-4	1	10920	20298	7461.9	7835.2	9361.8	6910.4	4828.9	26874	29210	18808	55011	701430	63366	23803	489820	1349200	3734500	47757	1011000	1082100	1077800	1068000	1166200	1177800	1093900	1034500	--	--
Zmwp005562	284.13	147.04	283.121	C17H17NO3	[M+H]+	cis-N-p-Coumaroyltyramine	Alkaloids	Phenolamine	-	1	7508.7	19351	14266	4534.5	8677.4	6788.4	8182.3	29936	27313	20241	53888	643100	61258	26744	466450	1367400	3670800	43440	1039400	1108500	1083000	1152100	1196000	1104000	1112500	1121900	--	--
mws0051	285.08	270	284.068	C16H12O5	[M+H]+	Acacetin	Flavonoids	Flavonoid	480-44-4	1	147170	270540	215490	47057	88411	114780	77475	317870	262350	87187	124560	280510	44876	127010	155080	263950	224200	125670	3017200	3148800	3540500	3341400	3463400	3248700	3244400	3461400	C01470	ko00944
MWSHY0187	285.08	168.01	284.068	C16H12O5	[M+H]+	5,7-Dihydroxy-6-methoxyflavone	Flavonoids	Flavonoid	480-11-5	2	5059	9815.8	5369.1	2089.3	3064	2307.4	2324.8	9421.7	5782.4	1443.4	4621.2	7976.8	1832	4231.5	5299.6	5605	6563.6	2791.5	86992	95518	96775	98884	93443	87607	87650	98085	--	--
mws4160	285.08	270.07	284.068	C16H12O5	[M+H]+	Wogonin (5,7-Dihydroxy-8-Methoxyflavone)	Flavonoids	Flavonoid	632-85-9	2	231130	443460	376910	80130	123150	166280	113330	466460	388550	117010	179390	423340	73688	185260	235940	362850	332050	187580	4714800	5138300	5051200	5195600	5441400	5078800	5101500	5175900	C10197	--
mws0129	285.08	270	284.068	C16H12O5	[M+H]+	Genkwanin (Apigenin 7-methyl ether)	Flavonoids	Flavonoid	437-64-9	1	6647.2	4229.1	1747.4	254.84	299.41	298.77	2862.4	5136.8	5322.9	3436.5	854.22	4313.7	3759.1	1836	1544.8	1481.9	4150.4	348.31	151940	149480	166570	171660	156150	167690	154010	157190	C10046	--
mws0668	283.07	151	284.076	C10H12N4O6	[M-H]-	Xanthosine	Nucleotides and derivatives	Nucleotides and derivatives	146-80-5	1	3008400	3552700	4953900	2629300	2434900	3329600	1794100	3403700	3286800	5629200	4182400	4259200	2271500	2757300	4270500	3170500	2432400	2459000	2286100	2531100	2543000	2614800	2675800	2549600	2411000	2574500	C01762	ko00230,ko00232,ko01100,ko01110,ko02010
mws1505	283.1	135	284.105	C17H16O4	[M-H]-	Phenethyl caffeate	Phenolic acids	Phenolic acids	104594-70-9	3	5851.3	9361.9	5639.1	10087	12168	5333	6907.8	6370.6	6457.5	4492.2	7727.6	3634.9	4311.9	5510.8	1320.4	1331.9	12613	10414	5019.1	4107	5350.7	6350.3	5023.6	5990.2	5860.8	4458.2	C10484	--
mws1489	283.26	283.26	284.272	C18H36O2	[M-H]-	Stearic Acid	Lipids	Free fatty acids	57-11-4	1	59680000	80713000	66466000	66263000	54124000	75137000	56993000	72130000	76875000	55043000	78892000	74866000	66485000	51742000	66711000	68692000	35562000	60017000	42614000	40879000	42660000	39120000	39385000	35644000	34778000	38819000	C01530	ko00061,ko01040
Zmyn005026	283.26	283.26	284.272	C18H36O2	[M-H]-	16-Methylheptadecanoic acid	Lipids	Free fatty acids	2724-58-5	2	30435000	39448000	33208000	30295000	24761000	36850000	27492000	34058000	37397000	27657000	37384000	36203000	31950000	29745000	32746000	34218000	14183000	27304000	19154000	18829000	18473000	17614000	17838000	14923000	14775000	16252000	C20356	--
mws1068	285.04	151	286.048	C15H10O6	[M-H]-	Kaempferol (3,5,7,4'-Tetrahydroxyflavone)	Flavonoids	Flavonols	520-18-3	1	1616000	2265000	3040600	1345500	1367700	1807100	2058600	1862400	1859400	499910	482440	777070	372870	552380	459620	761670	645600	786000	956940	1078700	1020900	1037600	1039500	1107700	1017000	1041900	C05903	ko00941,ko00944,ko01100,ko01110
Zmzp006523	287.06	195.03	286.048	C15H10O6	[M+H]+	6-Demethoxycapillarisin	Others	Others	61854-36-2	3	8020.7	10082	13224	6476	7023.4	8817	8625.4	8106.3	6988.9	3225.7	1474.8	1707.4	1501.1	3704.5	2143.3	5475.4	4120.9	4137	2420	3939.2	5336.3	7255.1	5340	4256.1	7037.2	8648.7	--	--
mws1521	285.1	121.03	286.105	C13H18O7	[M-H]-	Salicin	Phenolic acids	Phenolic acids	138-52-3	3	74015	45536	48575	31349	40555	43187	53534	41683	85054	184700	186890	169030	116600	179970	115190	683570	472480	512430	125940	149550	134320	136900	140560	147480	109590	126820	C01451	ko00010
Lmbp006165	287.13	91.05	286.121	C17H18O4	[M+H]+	6,7-cis-Dihydroxy-2-(2-phenylethyl)-5,6,7,8-tetrahydrochromone	Others	Others	-	3	252620	232830	238790	192720	202290	185380	212610	242410	163260	473140	298370	322900	296700	301270	236010	344490	471040	367010	223070	203730	225100	231940	243520	197920	217870	219400	--	--
MWSslk132	285.21	223.21	286.214	C16H30O4	[M-H]-	Hexadecanedioic acid	Lipids	Free fatty acids	505-54-4	3	98025	96403	99184	107560	89415	88255	124450	117580	118080	85860	112640	95248	70125	77515	64786	101650	111350	104240	116220	121600	120190	112870	125280	118730	122490	124640	C19615	ko00073,ko01100
Zmyn005252	285.24	239.24	286.251	C17H34O3	[M-H]-	3-Hydroxy-palmitic acid methyl ester	Lipids	Free fatty acids	51883-36-4	3	14210	10354	15835	14877	7319	15519	19732	20847	26093	14250	14921	11894	17439	12824	15852	9374	7708.3	8108.6	9903.5	11425	11604	13538	11643	14116	12205	12969	C11849	--
mws1436	287.29	97.2	286.287	C18H38O2	[M+H]+	1,18-Octadecanediol	Lipids	Free fatty acids	3155-43-9	2	6085.7	7112.8	5243.4	5818.5	6288.5	10108	3400.1	5945.8	5889.3	93349	51232	75767	39257	39545	57854	4682.6	4733.4	5591.7	20470	21889	21548	20892	21247	19435	22137	23977	--	--
mws1094	287.06	259	288.063	C15H12O6	[M-H]-	Aromadendrin (Dihydrokaempferol)	Flavonoids	Dihydroflavonol	480-20-6	2	21879	41098	39518	22810	23438	31580	25871	36033	23212	6866.4	9480.8	7228.7	9035.9	8130	8428.5	10002	8343.6	12563	18287	16400	17175	22615	21526	20601	21930	19049	C00974	ko00941,ko01100,ko01110
mws0064	287.06	135	288.063	C15H12O6	[M-H]-	Eriodictyol (5,7,3',4'-Tetrahydroxyflavanone)	Flavonoids	Dihydroflavone	552-58-9	3	1988.9	2957.8	1865.8	1324.9	2100.3	5072.8	941.5	2503.1	5947.2	11917	6736.9	10189	2287.2	4177.5	5683.7	15916	13572	13778	6059.9	5640.7	6031.7	4295.5	6896.6	7606.5	5418	6199.3	C05631	ko00941,ko01100,ko01110
Lmyn007883	287.22	287.22	288.23	C16H32O4	[M-H]-	9,16-Dihydroxypalmitic acid	Lipids	Free fatty acids	38076-49-2	2	2278200	2128800	2330500	2086600	2164600	2000900	1783900	2594500	1957900	2602100	2399200	1981200	1654000	1633300	1467200	1502900	1423900	1427800	1315800	1324800	1344900	1338400	1379300	1382700	1359500	1393900	--	--
pmn001686	287.22	241.22	288.23	C16H32O4	[M-H]-	10,16-Dihydroxypalmitic acid	Lipids	Free fatty acids	3233-90-7	1	81693	74990	87066	83631	90656	76442	61503	102760	70060	94683	91201	75986	64398	59581	54997	60093	53249	60977	50266	47058	52118	49329	50455	53790	57402	54697	C08285	ko00073
pme3163	289	97	290.04	C7H15O10P	[M-H]-	D-Sedoheptuiose 7-phosphate	Others	Saccharides and Alcohols	2646-35-7	3	818570	621740	722300	431450	545340	594770	636950	656900	843240	452060	584030	726500	790710	672910	520120	219780	468640	188630	521730	652210	592060	776930	651980	592710	445470	615030	--	--
pmb2657	289.1	97.1	290.123	C10H18N4O6	[M-H]-	Argininosuccinic acid	Organic acids	Organic acids	2387-71-5	3	219320	133680	179580	97234	161400	78546	156390	177200	210660	149750	151730	92321	152730	101760	149640	9333.3	6961.6	15737	148670	133330	134290	138450	142280	146270	141500	153050	C03406	ko00220,ko00250,ko01100,ko01110,ko01230
pmb0885	291	190.9	290.188	C18H26O3	[M+H]+	4-Oxo-9Z,11Z,13E,15E-Octadecatetraenoic Acid	Lipids	Free fatty acids	-	3	716630	653130	710130	719520	748870	767570	761160	783760	710490	627740	598200	373260	627320	608030	624390	316200	331170	419750	458100	483960	517220	527230	531380	500140	502490	522360	--	--
pmf0314	289.25	157	290.261	C20H34O	[M-H]-	cis-Abienol	Others	Saccharides and Alcohols	17990-16-8	3	13588	20273	15092	18277	20628	15210	15303	18107	17488	14191	16563	17161	14072	15220	15877	18025	18117	15884	11866	20601	19632	14139	22654	12266	15413	15283	--	--
Zmyn004548	291.2	235.17	292.204	C18H28O3	[M-H]-	12-Oxo-phytodienoic acid	Lipids	Free fatty acids	85551-10-6	1	10774	9379.7	11880	11237	12024	7411	26507	7575.7	16085	6265.2	11802	8489.2	15224	11901	5936.5	11278	10557	11619	14396	13972	12878	15747	15077	15127	15184	14660	C01226	ko00592,ko01100,ko01110
MWSmce689	293.25	95.09	292.24	C19H32O2	[M+H]+	Methyl linolenate	Lipids	Free fatty acids	301-00-8	2	73762	82468	98257	45206	61242	71335	66552	75949	65004	18219	22577	14180	31527	29195	27151	13375	15327	15347	550770	527510	640990	597500	586720	535980	553290	601960	--	--
Zmpn003368	293.21	195.14	294.219	C18H30O3	[M-H]-	13S-Hydroxy-9Z,11E,15Z-octadecatrienoic acid	Lipids	Free fatty acids	87984-82-5	1	352870	375940	509010	299280	315140	251110	719130	355470	446260	160950	268610	168700	169620	165090	156070	193960	272430	304990	518470	517940	503450	537240	541430	539100	537220	527790	C16316	ko00592
pmb2786	293.21	235.17	294.219	C18H30O3	[M-H]-	9-Hydroxy-10,12,15-octadecatrienoic acid*	Lipids	Free fatty acids	89886-42-0	3	26759	25244	25644	23103	22195	18926	40778	20161	31717	12921	24485	14605	22341	23408	16575	28941	30946	38761	41947	43925	37488	44964	44238	44147	46813	41171	C16326	ko00592
Zmyn004732	293.21	185.12	294.219	C18H30O3	[M-H]-	2R-hydroxy-9Z,12Z,15Z-octadecatrienoic acid	Lipids	Free fatty acids	-	3	29742	28377	35953	31862	26889	20781	37032	28229	34417	21574	17960	15656	20065	27725	17313	18098	22180	18817	110610	101970	105070	101950	106490	108660	101230	111710	C16342	ko00592
Zmyn004676	293.21	113.1	294.219	C18H30O3	[M-H]-	17-Hydroxylinolenic acid	Lipids	Free fatty acids	-	1	1286400	1303100	1473200	662420	899110	736050	1504000	1120900	1302900	355270	648980	597540	632350	669300	573880	982880	1223900	1135600	1912100	1955100	1936100	2074500	2007500	2091200	2006900	1999700	C16346	ko00592
pmb2787	293.21	275.1	294.219	C18H30O3	[M-H]-	9-Oxo-10E,12Z-octadecadienoic acid	Lipids	Free fatty acids	54232-59-6	3	63824	67341	77822	41880	52352	41644	97563	54524	68773	27270	37096	33107	50978	48442	38267	68968	77328	92040	122650	113710	115310	104370	93795	110370	112680	128770	C14766	ko00591
Lmbn005443	293.21	235.17	294.219	C18H30O3	[M-H]-	13-KODE; (9Z,11E)-13-Oxooctadeca-9,11-dienoic acid*	Lipids	Free fatty acids	54739-30-9	3	25741	25442	30239	25596	23964	22573	43709	20074	35697	14868	22617	18395	24445	26991	19198	30191	33083	36280	47406	47022	41000	47758	43727	47251	48026	45319	C14765	ko00591
pmb2792	293.21	193.1	294.219	C18H30O3	[M-H]-	13-Hydroxy-6,9,11-octadecatrienoic acid	Lipids	Free fatty acids	74784-20-6	3	101240	106660	118240	107410	62298	123700	51495	61806	96101	106990	140800	106580	119070	95397	103400	97474	111300	135800	32974	33974	32009	35802	39170	34062	32116	37882	--	--
Lmcn009539	293.25	293.25	294.256	C19H34O2	[M-H]-	E,E,Z-1,3,12-Nonadecatriene-5,14-diol	Lipids	Free fatty acids	-	1	12979	10335	11309	6856.6	10020	9494	19609	11645	15690	7473.3	12513	9228.4	11874	9529.5	8198.6	3748	7416.5	9996	9502.8	12971	15500	17482	13116	12647	18044	16913	--	--
Zmbp003483	296.11	134.06	295.106	C14H17NO6	[M+H]+	Indican	Alkaloids	Plumerane	487-60-5	2	297960	232500	282300	332360	318760	264260	303870	257280	225600	230020	202030	165490	238290	232140	264220	193090	210440	211890	243300	162970	191210	186890	220740	198050	215610	192310	C08481	--
Lmcp007250	297.11	91.05	296.105	C18H16O4	[M+H]+	5-Hydroxy-6-methoxy-2-(2-phenylethyl)chromone	Others	Others	-	3	4120.7	4689.2	2096.2	9182.9	4549.9	7519.6	11196	11274	7995.4	7752.6	11545	5354.3	9750.7	6921	4302.5	13944	13169	16418	7583	6840.2	8474.9	9095.9	8620.9	6802.6	5324.6	5244.9	--	--
Hmqp005455	297.24	81.07	296.234	C18H32O3	[M+H]+	15(R)-Hydroxylinoleic Acid*	Lipids	Free fatty acids	177931-23-6	1	106420	89443	121990	68242	83075	75735	160110	93111	118560	49987	80745	71996	89813	84055	69048	90628	127800	128430	457820	419040	424120	438720	408770	483540	486830	474590	--	--
Hmqp005411	297.24	81.07	296.234	C18H32O3	[M+H]+	9-Oxo-12Z-Octadecenoic acid*	Lipids	Free fatty acids	112543-32-5	1	111660	92333	132090	82628	78041	81537	144230	105500	117230	45482	69779	75787	86613	89547	75461	93298	131240	130340	439180	505060	485300	447680	530960	420740	439640	486540	--	--
Rfmb091	295.23	195.14	296.235	C18H32O3	[M-H]-	9S-Hydroxy-10E,12Z-octadecadienoic acid*	Lipids	Free fatty acids	15514-85-9	1	3097000	2797000	3454300	1828100	2239200	1869800	3575200	2402700	3119500	981580	1456000	1492700	1599700	1557400	1519900	2247000	2227500	2510600	4752500	4851800	4828700	4982000	5006300	4890700	4835300	4999100	C14767	ko00591
Lmbn005662	295.23	171.1	296.235	C18H32O3	[M-H]-	9(10)-EpOME;(9R,10S)-(12Z)-9,10-Epoxyoctadecenoic acid	Lipids	Free fatty acids	16833-56-0	1	136430	124420	182140	120590	95316	100250	198570	99121	153900	48171	64844	64665	92572	79872	85499	79607	136760	162190	728960	747520	733140	747610	729050	795530	721280	729500	C14825	ko00591,ko01100
Lmbn005369	295.23	195.14	296.235	C18H32O3	[M-H]-	13(S)-HODE;13(S)-Hydroxyoctadeca-9Z,11E-dienoic acid*	Lipids	Free fatty acids	10219-69-9	1	3062800	2742100	3334800	1891900	2221100	1824400	3455400	2394200	3077000	919420	1436800	1449600	1629100	1508400	1373900	2093600	2343300	2395100	4958300	4818800	4623100	4811400	4931100	5010300	4890500	4942000	C14762	ko00591
pmb2799	295.23	195.2	296.235	C18H32O3	[M-H]-	12,13-Epoxy-9-Octadecenoic Acid	Lipids	Free fatty acids	6799-85-5	1	9727.4	8186.6	9774	12702	6853.8	7722.3	6849.1	13502	8966.2	3776.2	7121.3	4479	5914.1	13376	3926.6	5573.2	5766.6	5881.9	22117	19503	15769	18284	15788	17489	18633	17451	C14826	ko00591,ko01100
pme1474	298.1	136	297.09	C11H15N5O3S	[M+H]+	5'-Deoxy-5'-(methylthio)adenosine	Nucleotides and derivatives	Nucleotides and derivatives	2457-80-9	1	35470000	34567000	37545000	27574000	30325000	30015000	30696000	32217000	31250000	34042000	32421000	39554000	34773000	35131000	33101000	24718000	27591000	22046000	31560000	31287000	32854000	31267000	34103000	35968000	34616000	32683000	C00170	ko00270,ko00908,ko01100
pmb0197	298.1	166.3	297.107	C11H15N5O5	[M+H]+	N7-Methylguanosine	Nucleotides and derivatives	Nucleotides and derivatives	20244-86-4	3	46707	55109	80093	73703	38412	57683	52428	46789	63278	52090	61839	83246	40835	43064	34772	277860	287260	215570	101670	95019	96610	103650	97770	127100	126190	122740	C20674	--
Lmbn009444	297.24	183.14	298.251	C18H34O3	[M-H]-	Ricinoleic acid	Lipids	Free fatty acids	141-22-0	2	170380	184390	180190	122780	141010	110370	183770	185800	243320	109640	123020	135740	92401	91737	105220	122990	113810	128090	122630	129480	128290	125950	128570	130100	130650	133560	C08365	--
pmf0297	297.32	183.1	298.324	C20H42O	[M-H]-	1-Eicosanol	Lipids	Free fatty acids	629-96-9	3	172660	184500	175740	117930	134960	104310	188410	175790	238150	111440	129580	133560	87738	97187	109350	123950	109620	132820	124240	127640	126170	130560	127840	133410	132110	122970	--	--
mws0724	298.08	208	299.087	C10H13N5O6	[M-H]-	8-Hydroxyguanosine	Nucleotides and derivatives	Nucleotides and derivatives	3868-31-3	2	57386	75356	57841	63103	47528	70249	84447	99541	79375	43438	48618	45293	29092	45509	41893	55786	48232	62488	51625	53108	31919	39657	46508	35444	44450	34558	--	--
ML10195036	300.3	60.05	299.282	C18H37NO2	[M+H]+	3-Dehydrosphinganine	Lipids	Sphingolipids	16105-69-4	3	3273.6	5189.3	5804.5	5221.1	4069.7	4397.6	10810	7368	9662	10838	9874.7	10959	5331	6617.1	4069.1	18738	17482	18446	12738	14472	16629	13430	17061	12830	12209	10169	C02934	ko00600,ko01100
MWSHY0126	301.07	258.05	300.063	C16H12O6	[M+H]+	Kaempferide (3,5,7-Trihydroxy-4'-methoxyflavone)	Flavonoids	Flavonols	491-54-3	2	247.51	309.31	308.98	247.22	160.65	419.35	242.39	241.82	325.38	1291.1	322.9	1229	412.9	160.65	202.97	2199.7	2291.4	988.68	4643.2	4643	4719	6711.5	5933.6	4820.3	4545.5	5234	C10098	ko00944
pmp000971	301.07	286.05	300.063	C16H12O6	[M+H]+	6-Demethoxy-7-methylcapillarisin	Others	Others	-	2	2589.9	9016.7	5672.6	16418	3648.4	3282.8	6394.2	15688	5533.1	29335	11626	41054	9485.4	7828.6	7262.4	142140	147220	86499	286280	301450	306060	293680	331670	335690	327890	327420	--	--
pmp000001	301.07	286.05	300.063	C16H12O6	[M+H]+	Hispidulin (5,7,4'-Trihydroxy-6-methoxyflavone)*	Flavonoids	Flavonoid	1447-88-7	3	23719	75326	54586	36608	26069	68873	38547	45776	16254	17417	6841.6	31714	9484.1	9446	9626.4	11080	5524.3	7542.5	76730	82291	77252	81356	84402	99157	75152	89337	C10058	--
pmp001127	301.07	286.08	300.063	C16H12O6	[M+H]+	Chrysoeriol	Flavonoids	Flavonoid	491-71-4	2	12110	30710	33427	6360.7	5486.8	17247	11712	34463	29791	395.74	218.13	3073.9	260.85	872.09	879.65	2170.5	5600	346.67	25258	28050	29527	32447	30751	28246	29968	30609	C04293	ko00944
mws0058	299.06	284	300.063	C16H12O6	[M-H]-	Diosmetin (5,7,3'-Trihydroxy-4'-methoxyflavone)*	Flavonoids	Dihydroflavone	520-34-3	3	23310	12643	11073	13955	9079.3	15945	7674.5	15212	16630	13311	14836	30783	20771	17993	19973	57083	63511	36710	48521	53283	46705	48171	53630	50153	51394	50436	C10038	--
Zmhp003514	301.07	286.05	300.063	C16H12O6	[M+H]+	6,7,8-Tetrahydroxy-5-methoxyflavone	Flavonoids	Flavonoid	-	2	10993	30988	31711	5169.8	4987.8	12007	10555	30942	25730	187.52	1021.8	4195.9	553.04	740.26	456.82	418.05	4913.1	735.15	26711	30997	30201	27109	28126	25392	30869	24563	--	--
Zmhn001358	299.08	137.02	300.084	C13H16O8	[M-H]-	4-O-Glucosyl-4-hydroxybenzoic acid	Phenolic acids	Phenolic acids	-	1	80156	112720	92551	142360	128790	164940	88411	116720	131290	223650	251620	294520	154130	335270	286560	482480	280130	394360	265220	275840	267460	265880	283450	280470	283140	286450	--	--
Lmsn002247	299.08	137.02	300.085	C13H16O8	[M-H]-	1-O-Salicyloyl-β-D-glucose	Phenolic acids	Phenolic acids	60517-74-0	1	91161	112490	105150	133010	151050	149080	112200	151750	136340	256470	241030	290080	189540	316380	291060	414200	267170	409350	247820	268180	266070	303000	297240	312230	305270	312570	--	--
pmb3142	299.1	137.1	300.085	C13H16O8	[M-H]-	Salicylic acid-2-O-glucoside	Phenolic acids	Phenolic acids	10366-91-3	3	3441400	4115500	4309800	4166800	4767600	4671000	4996500	4543200	5150300	4259500	4905700	4403100	5331500	5300500	4139600	9634400	9284100	8489400	4449700	4591900	4665900	4343700	4707800	4617000	4996400	4981100	--	--
pme2816	301.2	209.2	300.209	C20H28O2	[M+H]+	4-Oxoretinol	Others	Vitamin	62702-55-0	2	9144.4	10833	7420.3	8196.5	9233.9	8946.9	9316.3	9618.6	9641.4	12120	12080	12549	13976	16696	6318	14271	16671	17512	10812	12678	10328	12228	9972.9	12253	12214	13524	C16683	--
Zmyn005384	299.26	253.26	300.266	C18H36O3	[M-H]-	2R-Hydroxyoctadecanoic Acid	Lipids	Free fatty acids	26633-48-7	1	15836	11843	10215	12916	15517	13701	23722	30961	32916	17451	13705	16569	23528	14268	15222	14926	7763.4	9158.2	17590	18383	17871	21770	17153	17307	19505	19286	C03042	--
MWS4295	299.26	253.25	300.266	C18H36O3	[M-H]-	DL-2-hydroxystearic acid	Lipids	Free fatty acids	629-22-1	2	14640	11448	11007	15027	15286	14896	25108	31664	28567	15972	15952	16855	24487	13065	16161	14071	7176	8382.4	15061	20066	16052	20135	14142	16323	18326	21439	--	--
MWS5235	299.26	253.25	300.266	C18H36O3	[M-H]-	12-Hydroxyoctadecanoic acid	Lipids	Free fatty acids	106-14-9	2	6619.5	7413.1	10436	7071.1	7056.1	6666.6	12497	10183	8177.7	9010.7	7485.7	11201	7047.3	9893.9	7772.4	4200.5	5980.2	11708	8887.6	10756	9266.8	8856.1	9925.6	9259	9493.8	11507	--	--
Lmqn008288	299.26	299.26	300.267	C18H36O3	[M-H]-	3-Hydroxyoctadecanoic Acid	Lipids	Free fatty acids	45261-96-9	2	273630	345000	363510	746290	361270	441910	763730	370900	360220	278250	293360	345740	258270	265350	289180	278990	281500	328220	665760	591730	592400	639110	572960	619430	582010	645110	--	--
pmb3079	300.05	96.9	301.056	C8H16NO9P	[M-H]-	N-Acetyl-D-glucosamine-1-phosphate	Others	Saccharides and Alcohols	6866-69-9	3	74709	41455	50371	29536	65373	45770	61168	42775	61666	65378	88742	62392	99464	87057	112840	1379	5685	11120	62357	60916	59897	71595	54943	45719	71464	72814	C04256	--
pme2954	303.05	137.02	302.043	C15H10O7	[M+H]+	Quercetin	Flavonoids	Flavonols	117-39-5	1	273250	74940	67747	42644	26286	49290	23104	61239	743810	1152500	824280	1732000	890850	1334700	1025000	2298900	1430100	2197900	596670	645990	674550	677710	691570	711130	679760	683670	C00389	ko00941,ko00944,ko01100,ko01110
mws0920	301.04	151	302.043	C15H10O7	[M-H]-	Tricetin (5,7,3',4',5'-Pentahydroxyflavone)	Flavonoids	Flavonoid	520-31-0	2	35211	3323.2	2760.3	12917	9313	6111.1	4089.7	2729.2	54915	821.21	647.28	3118.9	944.45	1457.5	1883.8	1943	1598.3	2423.9	37899	28140	28219	35992	36605	37237	44917	37708	C10192	ko00941
Cmsp004086	303.09	229.08	302.079	C16H14O6	[M+H]+	Dihydrokaempferide	Flavonoids	Dihydroflavonol	137225-59-3	3	27313	17177	6558.8	18105	12204	14565	6494	13908	172910	206060	162190	135350	48052	196190	107760	301110	316610	319840	76782	187720	92451	106460	101340	120380	185850	172640	--	--
Zmhn000892	301.09	139.05	302.1	C13H18O8	[M-H]-	4-O-Glucosyl-3,4-dihydroxybenzyl alcohol	Phenolic acids	Phenolic acids	-	1	712630	708800	661790	899680	976010	991850	845930	804510	750060	936720	977500	965570	971150	1042800	978440	1085700	1134200	1210500	550510	573200	580850	596770	573010	573990	594310	575640	--	--
Lmbn014696	301.22	301.22	302.225	C20H30O2	[M-H]-	Pimaric acid	Terpenoids	Ditepenoids	127-27-5	1	311350	293950	384590	1922400	415340	725300	588080	832450	385880	354510	303760	395070	233190	357540	389220	256630	223440	456940	767270	551450	539810	660040	552410	520850	511590	592920	C09159	--
MWSslk208	301.22	301.22	302.225	C20H30O2	[M-H]-	Kaurenoic Acid	Terpenoids	Ditepenoids	6730-83-2	2	310150	292810	369940	1823200	424890	691940	533330	845200	350830	353320	305180	364000	228530	316690	353000	241380	222610	400320	723150	524590	479640	588020	538710	498100	455940	544750	C11874	ko00904,ko01100,ko01110
MWSmce549	303.25	57.07	302.246	C17H34O4	[M+H]+	1-Monomyristin	Lipids	Free fatty acids	589-68-4	3	1208700	965570	972080	1021500	1101500	894550	1145500	1335600	1217400	1028500	883260	869070	1080100	803630	847680	924470	943950	1049100	1065700	893020	914260	977620	1191100	1118800	1079800	1098900	--	--
mws0369	303.23	258.9	304.24	C20H32O2	[M-H]-	Arachidonic Acid	Lipids	Free fatty acids	506-32-1	1	325.64	1094	410.91	2266.7	297.86	504.03	605.19	546.87	621.1	802.77	699.43	796.54	727.26	297.53	226.29	1360.7	199.1	507.96	6767.8	6968.7	9148.6	6526.7	7278.4	7614.6	7616.4	10226	C00219	ko00590,ko00591,ko01040,ko01100
Hmdn001963	305.03	273	306.038	C14H10O8	[M-H]-	Methyl Brevifolincarboxylate	Phenolic acids	Phenolic acids	154702-76-8	3	6069.2	1027.5	505.5	1544.5	508.5	603	514.25	1094.5	4122.5	14894	20390	20374	22538	22401	28053	38769	40804	21344	17414	29506	16869	20931	17420	20956	16859	18468	--	--
pme1086	306.08	143	307.084	C10H17N3O6S	[M-H]-	Glutathione reduced form	Amino acids and derivatives	Amino acids and derivatives	70-18-8	1	56790	59662	39828	54426	54558	36072	54815	67764	46113	60252	59018	50352	37285	72449	48220	39714	43536	34663	35895	38548	44500	52663	60860	45271	44160	46999	C00051	ko00270,ko00480,ko01100,ko02010
pmn001610	307.26	307.3	308.272	C20H36O2	[M-H]-	Eicosadienoic acid	Lipids	Free fatty acids	5598-38-9	1	19871	22688	11551	53380	76984	97663	59921	104530	90605	65185	59502	48110	46716	41407	30640	34922	58856	50108	104080	162370	118480	169330	95331	157430	108770	89143	C16525	ko01040
pmb2791	309.21	209.1	310.1	C18H30O4	[M-H]-	9-Hydroperoxy-10E,12,15Z-octadecatrienoic acid	Lipids	Free fatty acids	111004-08-1	3	52605	51902	62377	38287	34992	44606	55609	39598	52489	41014	38679	49041	48594	54891	43886	45516	50159	56925	35713	41178	42638	39324	38342	47733	37245	44246	C16321	ko00592,ko01110
Zmzn003953	309.2	227.2	310.214	C18H30O4	[M-H]-	13(s)-hydroperoxy-(9z,11e,15z)-octadecatrienoic acid	Lipids	Free fatty acids	67597-26-6	3	230300	162960	199290	311200	344580	230680	368150	378220	347590	637620	485360	590670	178470	256780	233450	234550	250170	287040	426250	410660	358920	444540	390550	404520	370590	397810	C04785	ko00592,ko01100,ko01110
Zmyn004449	309.21	171.1	310.214	C18H30O4	[M-H]-	9-Hydroxy-12-oxo-10(E),15(Z)-octadecadienoic acid	Lipids	Free fatty acids	-	2	3234.9	2535.2	3818.1	3020.3	2413.2	3159	1639.6	2402	1521.9	1774.9	2233.7	1343	2124	1850.7	1327.2	2416.9	3155.6	1917.8	14351	13245	13899	13393	15526	15229	16932	14462	C21923	ko00592,ko01110
Hmqp006221	311.26	279.32	310.25	C19H34O3	[M+H]+	13-Hydroxy-9Z,11E-octadecadienoic acid	Lipids	Free fatty acids	18104-45-5	3	381.23	329.34	407.77	356.06	275.43	535.41	488.93	367.98	807.57	51.49	206.82	163.79	402.74	246.68	175.94	617.62	646.07	230.66	16194	15776	18726	17689	16780	15181	14964	15671	--	--
pmn001606	309.28	309.28	310.287	C20H38O2	[M-H]-	Eicosenoic acid	Lipids	Free fatty acids	26764-41-0	2	681280	808190	591200	1565800	879300	791160	786700	1206900	826480	1623700	525920	710510	713480	1041500	588420	666400	373930	445650	14349	15540	9290.1	9955.8	14127	13595	14059	8832.1	C16526	ko01040
Lmap001823	312.11	132.04	311.101	C14H17NO7	[M+H]+	Dhurrin	Alkaloids	Phenolamine	499-20-7	1	1208100	1886700	2593700	3132300	1452800	2024100	2928600	3103900	3248000	1946400	2639800	3038100	667600	1425900	887800	2071700	1554800	1986200	1535100	1036200	1303200	1532600	1693800	1480400	1926900	1364500	C05143	ko00460,ko01100,ko01110
pme3967	312.13	180	311.123	C12H17N5O5	[M+H]+	2-(Dimethylamino)guanosine	Nucleotides and derivatives	Nucleotides and derivatives	2140-67-2	1	143480	193330	205510	162640	112420	192270	156380	172530	183580	232820	186010	344530	120350	151030	131230	457340	498540	473670	329580	305040	336660	332490	369910	376040	349410	362590	--	--
Lmcp002302	312.13	180.09	311.123	C12H17N5O5	[M+H]+	N6-(2-Hydroxyethyl)adenosine	Nucleotides and derivatives	Nucleotides and derivatives	4338-48-1	1	167630	197440	222310	188660	143500	179210	153840	155000	191840	251760	198450	322420	127320	138860	138500	411260	464190	426490	337410	367760	313660	315090	378720	361240	377030	386160	--	--
MWSHY0047	313.11	269.08	312.1	C18H16O5	[M+H]+	5,7,4'-Trimethoxyflavone	Flavonoids	Flavonoid	5631-70-9	2	438.99	244.49	177.87	262.16	132.57	9	85.192	356.95	308.07	347.96	321.68	1365.2	267.99	241.22	9	613.59	3530.8	161.8	9052.3	12007	12881	11742	15079	12467	11947	13335	--	--
Lmcp005089	313.11	121.07	312.1	C18H16O5	[M+H]+	6,8-Dihydroxy-2-[2-(4-methoxyphenyl)ethyl]chromone	Others	Others	-	3	3603.6	24507	4171.3	488.61	2096	1313	17519	8942.4	1952.4	2815.7	3062.1	18803	16629	2437.9	19040	20354	48443	1752	73904	90827	91613	86948	104500	103160	97646	105670	--	--
MWSslk182	313.11	283.07	312.1	C18H16O5	[M+H]+	5,6,7-Trimethoxyflavone	Flavonoids	Flavonoid	973-67-1	2	299.77	166.53	781.65	179.74	182.12	266.81	441.48	982.79	262.53	438.88	446.51	2050.8	455.66	172.9	242.11	699.9	4794.7	182.02	21230	21537	24128	16972	24326	24424	19067	21404	--	--
mws0636	313.15	166	312.147	C18H20N2O3	[M+H]+	L-Phenylalanyl-L-phenylalanine	Amino acids and derivatives	Amino acids and derivatives	2577-40-4	1	46908	51012	60628	53509	52357	65690	31329	62963	36684	64955	30039	51608	50838	72599	38402	86860	104300	71370	83869	79888	80026	80754	85504	80551	71728	72240	--	--
pmb2804	311.1	171.3	312.23	C18H32O4	[M-H]-	13S-Hydroperoxy-9Z,11E-octadecadienoic acid	Lipids	Free fatty acids	33964-75-9	3	95002	107670	102540	60726	77012	61116	130490	82292	110430	45506	66056	73203	83818	91471	68120	92787	95076	100120	177730	183210	188420	190500	188680	173480	177810	174980	C04717	ko00591,ko01100
MWS80006	311.22	293.21	312.23	C18H32O4	[M-H]-	9-Hydroperoxy-9Z,11E-Octadecadienoic Acid	Lipids	Free fatty acids	5502-91-0	3	25993	21858	27342	32425	23409	22092	37657	31706	23069	19026	14448	12542	16619	13873	17940	15094	19739	19590	25935	24100	21667	26153	22708	22196	31419	18496	C14827	ko00591,ko01100
pmn001689	311.22	223.17	312.23	C18H32O4	[M-H]-	9-Hydroxy-12-oxo-15(Z)-octadecenoic acid	Lipids	Free fatty acids	-	2	84614	88544	88167	80067	63637	74390	93058	81235	111240	77141	94444	145460	80560	91058	70010	208910	229270	221320	131350	139210	134010	136770	138160	145330	149770	152870	C21924	ko00592,ko01110
Lmbn005287	311.22	249.22	312.23	C18H32O4	[M-H]-	7S,8S-DiHODE; (9Z,12Z)-(7S,8S)-Dihydroxyoctadeca-9,12-dienoic acid	Lipids	Free fatty acids	143288-65-7	1	178170	148050	184040	202430	158460	144120	253000	222300	207720	117450	170680	156030	130440	101300	123370	164370	195890	168200	166090	168860	166000	173870	164600	171370	178720	167230	C07354	ko00591
Lmbn004685	311.22	223.17	312.23	C18H32O4	[M-H]-	5S,8R-DiHODE; (5S,8R,9Z,12Z)-5,8-Dihydroxyoctadeca-9,12-dienoate	Lipids	Free fatty acids	-	2	23074	25270	23957	24235	14058	27154	14876	13951	21825	19180	24227	22097	21467	19039	27378	23820	21838	26795	12318	9738.1	13896	13821	10174	13786	9845.1	12033	C20186	ko00591
Rfmb087	311.22	293.21	312.23	C18H32O4	[M-H]-	9-Hydroxy-13-oxo-10-octadecenoic Acid	Lipids	Free fatty acids	-	1	172150	179890	174900	105600	113960	96701	163010	150250	190200	102870	112360	142180	156200	167200	179910	94475	112410	103820	263900	286990	298340	325740	301720	313220	300060	295830	--	--
pmf0397	311.3	183.1	312.303	C20H40O2	[M-H]-	Arachidic acid	Lipids	Free fatty acids	506-30-9	3	22945	23316	18251	22050	11961	18215	16600	21126	22303	8586.9	3958.4	10592	13034	8225.5	19513	13184	10416	12355	54547	19716	24159	19777	16951	15579	29321	27554	C06425	ko01040
Lmyp001375	314.09	152.03	313.08	C13H15NO8	[M+H]+	BOA-6-O-glucoside	Alkaloids	Alkaloids	-	2	86261	38974	43614	34925	111860	105230	30053	48894	58592	53525	58389	51629	49487	19085	20372	51628	58150	62628	37731	49223	51578	45402	47220	49135	44605	42450	--	--
mws1433	314.14	177.05	313.131	C18H19NO4	[M+H]+	N-Feruloyltyramine	Alkaloids	Phenolamine	66648-43-9	1	1084400	2080300	1095500	818710	659900	653260	510830	1453400	560440	555860	790790	2330900	1496300	530230	1812400	2031200	6122800	744050	4469900	5024400	4956100	4946300	5245700	5040400	4944000	4921300	C02717	--
MWStz221	314.14	177.06	313.131	C18H19NO4	[M+H]+	N-Cis-Feruloyltyramine	Alkaloids	Phenolamine	80510-09-4	1	1263800	2182300	1151000	900890	749890	672730	507860	1569700	634050	586250	818310	2486300	1702000	586160	1959800	2311000	6701100	784680	4795000	5127200	5478700	5072400	5324800	5205800	5299200	4966800	--	--
mws1174	313.07	253	314.079	C17H14O6	[M-H]-	3-O-Acetylpinobanksin	Flavonoids	Dihydroflavonol	52117-69-8	1	156390	228120	170220	79420	116240	463470	37399	298390	107060	1287900	210980	114970	63530	172860	62533	54765	420100	408800	166490	178590	165390	165150	176890	164770	185580	172990	C16418	ko00941
Lmmn002179	313.09	107.05	314.1	C14H18O8	[M-H]-	Methyl salicylate-2-O-glucoside	Phenolic acids	Phenolic acids	10019-60-0	2	229610	207940	208010	187600	231410	198690	206190	178660	218070	234670	252010	272430	211500	225740	197720	219020	215340	241450	215640	236100	260460	212580	257620	258170	246290	251390	--	--
Lmbn005822	313.24	223.21	314.246	C18H34O4	[M-H]-	9,10-DHOME; (12Z)-9,10-Dihydroxyoctadec-12-enoic acid	Lipids	Free fatty acids	263399-34-4	3	628.56	1140.5	1275.5	648.65	2180.3	1316.5	2142.4	278.1	462.74	484.36	652.82	473.93	716.02	451.41	1465.7	1379.7	1725.2	2182.4	1646.7	1335.1	1299.5	1160.5	955.35	1087.3	887.64	1021.5	C14828	ko00591
Lmbn005487	313.24	251.24	314.246	C18H34O4	[M-H]-	12,13-DHOME; (9Z)-12,13-Dihydroxyoctadec-9-enoic acid	Lipids	Free fatty acids	263399-35-5	1	30556	29699	34769	41326	33553	34582	37016	40818	41929	37654	43438	38746	32995	26774	30906	38325	35838	36022	73567	69791	72227	70744	71874	69126	69008	74170	C14829	ko00591
Lmbn007891	313.24	183.14	314.246	C18H34O4	[M-H]-	Hydroxy ricinoleic acid	Lipids	Free fatty acids	-	3	54566	50749	64552	38887	35976	38019	46237	49705	54827	39940	39567	72863	38925	36075	40052	102400	111170	106470	172760	177190	174110	189340	186100	177160	180620	185670	--	--
Lmqn004838	315.01	299.99	316.022	C15H8O8	[M-H]-	3-O-Methylellagic acid	Tannins	Tannin	-	2	1787.2	445.68	678.07	337.32	915.89	1178	1129.5	917.15	1161.9	4245.8	3899.7	5875.7	672.8	6422.5	4464.6	10391	16708	15941	15658	24990	22901	16125	20440	16308	20622	18219	--	--
Zmzp004111	317.06	302.04	316.058	C16H12O7	[M+H]+	Selagin	Flavonoids	Flavonoid	-	2	5916.5	20784	15210	8463.2	7629.2	10649	12286	4187.8	13409	50318	32473	97422	35047	66243	38700	148210	129770	119820	96422	56167	123440	83348	62296	82855	65834	60217	--	--
mws0988	315.05	165	316.058	C16H12O7	[M-H]-	Rhamnetin	Flavonoids	Flavonols	90-19-7	1	7132.7	6492.4	3112.2	1228.3	2241.1	7994.9	3338.8	4496	4292.3	54887	8267.1	108640	1730.6	11409	23037	5029.6	7503.2	10147	17230	24467	19645	21495	19510	22778	20996	20120	C10176	--
MWSHY0068	317.07	274.05	316.058	C16H12O7	[M+H]+	Isorhamnetin	Flavonoids	Flavonols	480-19-3	1	80667	17510	16062	13763	11838	17173	10551	18428	182230	352980	305160	662340	217320	400650	242500	1208500	729120	1032600	202180	249520	239210	243600	250970	260180	258500	262920	C10084	--
Zmzp006646	317.07	302.04	316.058	C16H12O7	[M+H]+	Capillarisin	Others	Others	56365-38-9	1	450170	112640	107210	80543	62342	87113	56720	116320	1053500	2035000	1833600	3805600	1297600	2316700	1525500	7029100	4509500	6114700	1330100	1454100	1526200	1384700	1582700	1565500	1507400	1501700	C08999	--
Lmmn004912	315.05	271.02	316.058	C16H12O7	[M-H]-	3-O-Methylquercetin	Flavonoids	Flavonols	1486-70-0	2	8988.2	6506.4	7925.7	7798.3	9249	10968	10280	9036.6	16091	19240	18002	27818	14061	17885	21945	16362	16724	15514	11005	11976	14941	18355	10442	12865	12492	13999	C04443	ko00944
Lmfp001509	317.09	153.02	316.079	C13H16O9	[M+H]+	1-O-Galloyl-rhamnose	Tannins	Tannin	-	3	13112	9190.9	2036.7	1387.3	8853.4	11314	8532.7	5442	16365	29799	34199	33254	30667	38064	21723	41005	36675	37454	28213	32260	23329	26350	32023	41886	33995	31566	--	--
pmb2871	315.07	153	316.079	C13H16O9	[M-H]-	1-O-Gentisoyl-D-glucoside*	Phenolic acids	Phenolic acids	23445-11-6	1	787220	906870	970520	919080	831220	955200	945510	911620	864980	1103200	841240	1105900	830040	836710	779110	1818300	2678100	1681600	795590	996450	824200	888940	931960	924710	901850	936040	--	--
pmn001367	315.07	153.02	316.079	C13H16O9	[M-H]-	Protocatechuic acid-4-O-glucoside*	Phenolic acids	Phenolic acids	-	1	354830	152530	78847	160810	242740	251000	187960	88021	135280	63619	164130	292100	234900	291990	81781	156940	43617	390610	242660	197340	193860	298160	188990	199810	247850	213840	--	--
Hmtn001120	315.11	153.06	316.116	C14H20O8	[M-H]-	5-(2-Hydroxyethyl)-2-O-glucosylphenol	Phenolic acids	Phenolic acids	-	1	284840	309570	326510	443920	334260	336620	413490	364450	324290	425590	357200	390040	296180	429060	268300	1757800	1166200	1527600	365130	406040	460370	410750	385850	393650	412940	403140	--	--
Zmtn001661	315.11	153.02	316.116	C14H20O8	[M-H]-	Vanilloloside	Phenolic acids	Phenolic acids	74950-96-2	2	171930	94464	150620	225990	246490	106190	245690	213290	159420	104140	229900	242750	250300	220670	122680	291260	75968	297420	224560	192430	241200	224910	203570	216600	131380	229640	--	--
mws0582	322.11	130	321.099	C11H19N3O6S	[M+H]+	S-(Methyl)glutathione	Amino acids and derivatives	Amino acids and derivatives	2922-56-7	1	34187	47499	60226	43113	42631	34088	59335	56662	59595	53128	69944	72275	43273	56489	39485	35502	46211	37968	50461	53925	65123	53907	54604	67959	57576	66135	C11347	--
MWSslk257	324.06	112.05	323.052	C9H14N3O8P	[M+H]+	Cytidine 5'-monophosphate(Cytidylic acid)	Nucleotides and derivatives	Nucleotides and derivatives	63-37-6	3	189740	290890	268990	432960	152210	396460	181810	286000	294710	213180	264570	464180	198010	219820	152490	576130	558670	848280	380370	462910	397370	401130	451430	470660	477100	440120	C00055	ko00240,ko01100
pme3188	323.03	211	324.036	C9H13N2O9P	[M-H]-	Uridine 5'-monophosphate	Nucleotides and derivatives	Nucleotides and derivatives	58-97-9	1	849270	2667600	2229900	2686500	540370	2425100	1051400	2729200	2036100	1213100	2471000	3646000	339890	1173900	364620	7108900	5935800	5522000	2668100	2267800	2949000	2426000	3098700	2693600	3246200	2576500	C00105	ko00240,ko01100
Hmqp006023	326.27	309.27	324.266	C20H36O3	[M+H]+	Ethyl 9-Hydroxy-10,12-octadecadienoic acid	Lipids	Free fatty acids	-	3	12428	11253	18410	8642.6	2911	9390.7	41002	13438	14653	10154	21609	11502	3526.7	9401.7	9816.5	15165	8909.2	18240	32078	31898	33769	32011	34625	34275	32080	33040	--	--
mws0983	326.31	62.06	325.298	C20H39NO2	[M+H]+	N-Oleoylethanolamine	Alkaloids	Alkaloids	111-58-0	1	116380	103650	174830	87928	30600	86640	373230	139550	139940	105690	206350	127490	36460	85909	98226	142310	87717	169280	300180	306150	313740	326790	316120	307840	317130	320490	C20792	--
Lmsn003111	325.09	145.03	326.1	C15H18O8	[M-H]-	1-O-p-Coumaroyl-β-D-glucose	Phenolic acids	Phenolic acids	7139-64-2	1	1214600	1585300	1086900	1016900	1242100	1213900	1400800	1465800	2305600	4826300	3330900	4643300	2517900	4372600	4234600	10126000	10323000	7763300	8266400	9018000	8641300	9308600	6952300	8082400	8774300	8228300	C16827	--
Zmzn001549	325.09	119.05	326.1	C15H18O8	[M-H]-	Ferulic acid-1-O-glucoside	Phenolic acids	Phenolic acids	14364-05-7	2	33062000	33103000	36354000	32960000	31984000	36270000	31553000	33874000	32373000	36119000	40935000	43295000	29352000	36196000	34167000	44350000	38700000	41441000	29955000	31816000	29320000	31361000	32371000	31062000	32055000	36264000	C04415	--
Zmhn002301	325.09	163.04	326.1	C15H18O8	[M-H]-	p-Coumaric acid-4-O-glucoside	Phenolic acids	Phenolic acids	117405-48-8	1	28348000	29536000	27619000	29057000	27469000	28032000	28484000	28856000	30882000	34985000	37247000	35706000	26718000	29939000	32364000	41441000	34513000	37581000	25839000	26419000	26323000	26039000	26673000	27454000	28679000	27244000	C06739	--
Lmqn000351	325.11	59.01	326.121	C12H22O10	[M-H]-	Rutinose	Others	Saccharides and Alcohols	90-74-4	3	106210	208770	159350	196650	143250	173640	104050	93504	80870	148120	117190	129080	111770	232640	214290	84956	79282	97441	96118	73210	74318	87398	90035	96117	82734	81984	C08247	--
MWSmce278	327.19	159.08	326.188	C21H26O3	[M+H]+	Acitretin	Others	Vitamin	55079-83-9	2	9314.8	4849.1	3495.9	9945.8	10295	8401.4	7139.1	4413.7	9084.3	5630.4	6934.3	4858.6	11778	11614	9002.6	12108	9700.7	12385	5761.5	7679.8	5577.3	7119.6	7623.3	8549.8	8635.2	7888.2	--	--
Lmtn002233	327.11	165.05	328.116	C15H20O8	[M-H]-	Androsin	Phenolic acids	Phenolic acids	531-28-2	2	330100	308950	372900	373940	307540	345760	362190	364950	256200	370290	383990	421190	317270	353840	322670	418330	385940	440480	308440	285950	303090	289650	290240	257930	322180	327150	--	--
pmn001690	327.14	165.09	328.152	C16H24O7	[M-H]-	3-Hydroxy-4-isopropylbenzylalcohol-3-O-glucoside	Phenolic acids	Phenolic acids	-	2	161500	209720	219230	212200	229410	168980	198350	232280	205380	126590	104630	114400	104380	113760	113930	69179	59504	58978	63736	73896	74686	56836	56608	72954	71593	71902	--	--
pmn001691	327.22	291.2	328.225	C18H32O5	[M-H]-	9,12,13-Trihydroxy-10,15-octadecadienoic acid	Lipids	Free fatty acids	-	1	1070200	1077100	1116400	596600	802600	711260	1104200	779090	1181100	767820	766380	672110	924890	1041500	826360	1225600	914600	1138500	923450	972780	879500	994860	972000	975880	966590	1023400	--	--
mws0371	327.23	283.3	328.24	C22H32O2	[M-H]-	Cis-4,7,10,13,16,19-Docosahexaenoic Acid	Lipids	Free fatty acids	6217-54-5	3	1683.7	1316.6	3329.9	1701.4	659.18	2304.9	1946.9	14994	2771.8	2879.5	5298.3	3548.8	1725.9	1773.9	2285.2	2180.7	1246.5	1612.1	2698.7	3907.4	3200.4	2452.2	4543.6	3153.9	3254.2	3758.6	C06429	ko01040
mws0884	328.05	134.2	329.053	C10H12N5O6P	[M-H]-	Cyclic 3',5'-Adenylic acid	Nucleotides and derivatives	Nucleotides and derivatives	60-92-4	1	1278000	1405600	1445700	1137200	1133500	1246200	1631500	1521600	1408900	1093200	1348600	1267500	1180600	1194500	1214000	427220	852410	686100	860980	870690	964550	952460	934640	972800	998220	982050	C00575	ko00230,ko01100
MWStz208	330.13	177.06	329.126	C18H19NO5	[M+H]+	N-Feruloyloctopamine	Alkaloids	Phenolamine	66648-44-0	2	111310	114980	211990	163720	101690	178180	81220	103310	150650	124850	110280	134970	114700	113190	103130	243040	346830	154160	124140	133590	156070	161320	152660	155410	151240	141400	--	--
Zmlp005013	331.04	299.02	330.038	C16H10O8	[M+H]+	3,3'-O-Dimethylellagic Acid	Tannins	Tannin	2239-88-5	3	5477.4	6331.1	6678.3	8658.8	8191.5	6251.8	6494.5	8278.4	7915.5	9475.5	7525.6	9927.7	7938.9	10905	10819	9488.2	6051.8	5436.7	6844.2	6491.9	6310.8	6272.3	3753.1	7744.4	6503.6	7397.1	--	--
Lmtn002565	329.11	167.03	330.095	C14H18O9	[M-H]-	1-O-Vanilloyl-D-Glucose	Phenolic acids	Phenolic acids	-	1	198090	256120	229270	257010	175260	298210	259840	227510	289830	221360	173470	300480	219350	302010	284630	346900	230680	368260	418020	437620	476970	480650	454690	426800	469250	428010	C20470	--
Smhn002346	329.08	167.03	330.095	C14H18O9	[M-H]-	2,4,6-trihydroxyacetophenone-6-O-glucoside	Phenolic acids	Phenolic acids	-	1	2355400	2157900	2450000	2105300	2627400	2453700	2681100	2320800	2515700	2142800	1927400	1667100	3346800	2148500	1947200	2104700	2700700	2199500	2437800	2704200	2683500	2697600	2770700	2764300	2781900	2803900	--	--
Zmhn001883	329.09	209.04	330.095	C14H18O9	[M-H]-	Vanillic acid-4-O-glucoside	Phenolic acids	Phenolic acids	32142-31-7	1	31449	29836	27120	33610	29423	32835	35736	32264	41046	73453	110450	56615	65489	79573	79519	90274	48505	69189	58238	50120	58404	65538	60215	54929	43115	53385	--	--
Hmqn003054	329.23	311.23	330.24	C18H34O5	[M-H]-	9,10,11-Trihydroxy-12-octadecenoic acid	Lipids	Free fatty acids	61911-67-9	1	372440	338410	375350	196880	262470	188600	407560	267870	390600	191910	207080	227710	286820	261090	265630	308120	262810	269490	419930	391790	391140	409650	403790	417700	397690	411850	--	--
Lmbn004240	329.23	199.13	330.241	C18H34O5	[M-H]-	9,10-Dihydroxy-12,13-epoxyoctadecanoic acid	Lipids	Free fatty acids	-	2	8758.4	4775.6	4702.1	1829.2	3550.5	3362.5	4511.4	4109.5	3258.6	1465.3	1345.1	603.84	557.24	1023.6	1345.4	3082.3	3363.2	3997.7	24332	26430	25700	23657	26850	22576	23027	24072	C14837	ko00591
pmn001694	329.23	229.15	330.241	C18H34O5	[M-H]-	9,10,13-Trihydroxy-11-Octadecenoic Acid	Lipids	Free fatty acids	29907-57-1	1	6518700	5893300	6371200	3566500	4519300	3376400	6651900	4524500	6730300	3389600	3488700	3683600	4715200	5329400	4577300	5182000	4249600	4639900	6553100	6318100	6259400	6675800	6598800	6610900	6572800	6104800	C14835	ko00591
Lmbn003970	329.23	211.14	330.241	C18H34O5	[M-H]-	9,12,13-TriHOME; 9(S),12(S),13(S)-Trihydroxy-10(E)-octadecenoic acid	Lipids	Free fatty acids	97134-11-7	2	115930	143180	171050	46319	58163	71696	139320	108240	126720	50550	61338	72907	65000	57541	60541	161390	147860	180040	209250	207740	221650	212000	235300	218000	192260	210490	C14833	ko00591
pmp001284	331.28	313.27	330.277	C19H38O4	[M+H]+	Monopalmitin	Lipids	Glycerol ester	542-44-9	1	324550	293510	270720	282140	287760	302650	261370	327720	331760	297160	310530	281750	255550	280110	299250	269970	255580	316860	319410	313120	325550	288610	334700	342300	325430	338790	--	--
pme3184	332.08	136	331.068	C10H14N5O6P	[M+H]+	2'-Deoxyadenosine-5'-monophosphate	Nucleotides and derivatives	Nucleotides and derivatives	653-63-4	2	271640	232050	265620	298390	350440	280940	340010	387200	282770	173210	247340	215140	271240	256050	237440	72335	103810	92299	142280	211150	191460	292210	169250	165530	218260	183430	C00360	ko00230,ko01100
pmb0789	332.13	152.07	331.127	C14H21NO8	[M+H]+	Pyridoxine-5'-O-glucoside	Others	Vitamin	-	3	131600	108720	101710	79906	99444	101860	151340	128340	109940	117760	167180	119380	228300	86611	108440	151960	239320	152440	135320	127980	137100	120310	144080	166370	156790	154840	C03996	--
pmc0066	333.05	137.05	332.052	C10H13N4O7P	[M+H]+	2'-Deoxyinosine-5'-monophosphate	Nucleotides and derivatives	Nucleotides and derivatives	3393-18-8	3	13005000	14804000	14712000	14282000	13752000	14871000	13203000	13097000	12552000	14929000	14409000	14093000	13869000	16713000	15937000	12964000	11049000	14720000	11206000	11243000	11711000	11953000	11352000	11684000	10987000	12449000	C06196	ko00230
pmn001518	331.07	169.01	332.074	C13H16O10	[M-H]-	1-O-Galloyl-D-glucose	Tannins	Tannin	58511-73-2	2	725150	750540	757760	846500	734230	772100	939980	880760	853380	801040	760350	921030	591930	742490	606220	1067900	1389600	820270	562740	633210	630690	577600	562350	567180	597150	494480	C01158	--
Lmyn007622	331.25	157.12	332.256	C18H36O5	[M-H]-	9,10,18-Trihydroxystearic acid	Lipids	Free fatty acids	496-86-6	1	27011	25024	37719	20080	20745	24482	24654	29553	23216	21755	24473	21127	19735	18404	18282	30997	29113	38069	23473	23006	24179	27531	23667	22253	25731	24816	C19621	ko00073
MWS2426	332.13	203.08	333.132	C16H19N3O5	[M-H]-	Tryptophan glutamic acid	Amino acids and derivatives	Amino acids and derivatives	36099-95-3	3	22639	26876	30012	14970	17736	18628	20221	19528	23885	13333	13861	21064	21346	19405	15242	14752	9893	14026	19535	21778	27070	21725	19573	13613	23359	18931	--	--
mws0675	335.06	123	334.057	C11H15N2O8P	[M+H]+	β-Nicotinamide mononucleotide	Nucleotides and derivatives	Nucleotides and derivatives	1094-61-7	1	1233600	1649000	1621600	1213700	1067600	1237700	1295000	1656200	1674600	1328100	1838200	1837200	1278400	1294600	1408600	812000	965720	773670	1001900	987300	1009300	1166900	1120700	1319700	1138000	1266800	C00455	ko00760,ko01100
MWStz294	337.15	177.05	336.147	C20H20N2O3	[M+H]+	N-Feruloyltryptamine	Alkaloids	Plumerane	53905-13-8	1	110000	150850	159790	198790	131000	200450	149150	196400	146920	85402	378490	641890	82058	74235	155390	1981700	4715300	385180	1529200	1622700	1818600	1871300	1744400	1727700	1739200	1743000	--	--
Cmhp005227	339.11	177.05	338.1	C16H18O8	[M+H]+	4,8-Dihydroxy Naphthol-1-O-glucoside	Quinones	Quinones	-	1	38449	16669	17009	4573.4	74930	10325	3438.7	12281	48886	18981	26752	23868	3086.7	14576	24426	53603	22760	38500	50444	48223	71846	62790	61395	47380	58453	62530	--	--
MWS2673	339.25	121.1	338.246	C20H34O4	[M+H]+	5,6-DiHETrE [5,6-dihydroxy-8Z,11Z,14Z-eicosatrienoic acid]	Lipids	Free fatty acids	213382-49-1	3	4327.4	9830	7746.1	12719	877.59	12735	19397	12507	13035	12964	19103	13788	9748.7	14936	9480.6	45435	48558	41122	16429	17601	18703	14558	20977	21224	14678	15588	C14772	ko00590,ko01100
pme3311	339	97	339.996	C6H14O12P2	[M-H]-	D-Fructose-1,6-biphosphate	Others	Saccharides and Alcohols	488-69-7	3	50652	14700	20670	26877	37236	21889	16393	17072	38619	42279	48458	23786	85410	54078	60202	7023.3	5018.1	4514.1	20915	29579	32153	22046	19443	21564	16321	24989	C00354	ko00400,ko00710,ko01100,ko01110,ko01200
Zmyn000083	338.99	78.96	339.996	C6H14O12P2	[M-H]-	D-Glucose 1,6-bisphosphate	Others	Saccharides and Alcohols	10139-18-1	3	37973	26192	27234	19918	27525	33473	24956	25252	33751	41542	32909	24368	60164	49771	53205	4281.8	4818.3	1715.2	14281	19627	13383	19154	18820	21843	19067	22175	C01231	ko00500,ko01100
Cmyn001328	339.07	177.02	340.079	C15H16O9	[M-H]-	Daphnin	Lignans and Coumarins	Coumarins	486-55-5	1	2970500	1956400	2453000	2869200	3557500	3253600	2560400	2852000	2488200	2126900	2211400	2139000	2370200	2246300	1905000	2013700	1547700	1938700	995930	1457600	1778700	1498800	1654500	1492100	1669200	1478100	C01421	--
mws1015	339.07	177	340.079	C15H16O9	[M-H]-	Esculin (6,7-DihydroxyCoumarin-6-glucoside)	Lignans and Coumarins	Coumarins	531-75-9	1	1698700	1194400	1214300	1638700	1593100	1679300	1466600	1746000	1423800	1037000	1364800	1435700	1140100	1148800	976260	1350400	1319200	1298600	870630	937930	842050	785350	1036800	1050500	913930	803770	C09264	--
pmf0400	339.33	183.2	340.334	C22H44O2	[M-H]-	Docosanoic acid (Behenic acid)	Lipids	Free fatty acids	112-85-6	3	51616	41792	38500	32506	121730	25614	75045	59422	75466	47453	44013	27733	31227	63573	39423	41713	43508	28453	34895	25396	23156	27790	34952	42429	28240	21880	C08281	ko00073,ko01040
Jmwn002620	341.09	161.02	342.095	C15H18O9	[M-H]-	Vanillic Acid-4-O-Glucuronide	Phenolic acids	Phenolic acids	-	1	839000	836020	513240	2435400	1602900	709860	680450	624950	1077700	2575900	3033500	2999500	2142300	4014200	4175500	3007500	1648600	2848700	2446100	2558900	2954200	2878900	2444800	2746600	2763100	2658200	--	--
Lmsn002548	341.09	161.02	342.095	C15H18O9	[M-H]-	1-O-Caffeoyl-β-D-glucose	Phenolic acids	Phenolic acids	14364-08-0	1	819100	730290	527430	2478000	1807500	670530	648030	645820	840720	2743000	2953200	2562200	2050700	3656000	3385200	2947900	1774200	2820800	2558200	2594000	2771900	2803700	2749600	2786700	2684500	2765600	C10433	--
Zmhn001793	341.09	179.03	342.096	C15H18O9	[M-H]-	6-O-Caffeoyl-D-glucose	Phenolic acids	Phenolic acids	-	2	31889000	31096000	36318000	32551000	31273000	34727000	32396000	32812000	29581000	29098000	28510000	30538000	29192000	34416000	32099000	39756000	32927000	38036000	22857000	24419000	25721000	24858000	24609000	23355000	25410000	23536000	--	--
Lmcp004714	343.12	137.06	342.11	C19H18O6	[M+H]+	6-Hydroxy-7-Methoxy-2-[2-(3'-Hydroxy-4'-Methoxyphenyl)Ethyl]Chromone	Others	Others	-	3	7764.4	7759.9	4797.7	3009.3	7674	5516.4	7501.2	6370.5	5735.7	2148	2865.7	4880.4	6426.9	3959.5	5127.4	3817.6	8598.6	5382.3	4930.7	5539.4	4498	7101.4	5116.3	4842.1	5524.7	6049.2	--	--
pme0519	341.11	119.03	342.116	C12H22O11	[M-H]-	D-Sucrose*	Others	Saccharides and Alcohols	57-50-1	1	299670	462960	330490	455880	388530	319320	287660	359820	330630	331130	311930	660240	222270	376740	525190	121740	148620	85996	137600	277970	186200	164720	130610	185320	144390	235360	C00089	ko00052,ko00500,ko01100,ko01110,ko02010
mws1333	341.11	113	342.116	C12H22O11	[M-H]-	Melibiose	Others	Saccharides and Alcohols	585-99-9	1	165160	315670	160310	129170	255570	200070	108220	167330	229230	239450	274600	284730	224820	285920	335990	98836	47400	116710	123470	64288	126210	111200	118060	209920	128150	113520	C05402	ko00052,ko01100,ko02010
mws5038	341.11	89.02	342.116	C12H22O11	[M-H]-	Isomaltulose*	Others	Saccharides and Alcohols	13718-94-0	1	257950	445930	489320	619120	300540	385640	261510	176280	283990	375930	336050	477770	287230	442570	209910	14756	79964	140170	185200	169720	95897	145850	182560	91902	143020	156880	C01742	--
mws1080	341.11	179	342.116	C12H22O11	[M-H]-	Galactinol	Others	Saccharides and Alcohols	3687-64-7	1	468160	453650	376780	545110	494060	977760	535000	314170	661810	984430	637810	883980	900610	888680	849230	234850	197330	224940	398360	412490	400560	376910	416520	498010	479890	512670	C01235	ko00052,ko01100
Lmsn000381	341.11	89.02	342.116	C12H22O11	[M-H]-	D-Maltose*	Others	Saccharides and Alcohols	133-99-3	1	203040	489510	419140	475300	380030	344880	324390	163510	225310	319360	326700	828830	399370	255650	237070	59564	51933	65100	130540	213460	137320	184150	122380	112390	61400	137790	C01971	--
MA10039641	341.11	89.02	342.116	C12H22O11	[M-H]-	Lactobiose	Others	Saccharides and Alcohols	63-42-3	1	247240	601630	485430	406820	247270	341650	353460	70597	326430	302760	276440	612400	203130	337520	355730	225700	56565	177250	171870	360320	150120	132810	165630	317430	213090	232550	C00243	ko00052,ko01100,ko02010
mws0264	341.11	119	342.116	C12H22O11	[M-H]-	D-Trehalose*	Others	Saccharides and Alcohols	99-20-7	1	160480	319060	208710	238470	185940	122690	157500	135290	199550	265730	172280	403820	178580	216890	315940	75678	78742	42528	100180	201220	86445	89029	102030	88990	101640	187060	C01083	ko00500,ko01100,ko01110,ko02010
mws0906	341.12	179	342.131	C16H22O8	[M-H]-	Coniferin	Phenolic acids	Phenolic acids	531-29-3	2	992790	975310	961580	1026400	1003000	1041500	954080	1129300	895320	927200	901250	879750	938840	847130	836710	1204900	802700	1123800	647520	735500	677910	693120	677800	679910	708740	690880	C00761	ko00940
HJAP050	344.15	177.05	343.142	C19H21NO5	[M+H]+	N-Feruloyl-3-methoxytyramine	Alkaloids	Phenolamine	78510-19-7	1	1735400	1700700	2239000	2598300	2360000	2474500	1900700	2115200	2437600	1122100	1706200	6743000	3251900	1451200	3847500	12662000	33762000	3197800	11314000	11303000	12607000	13188000	13039000	12372000	12118000	13185000	--	--
Lmmn000774	343.1	181.05	344.111	C15H20O9	[M-H]-	Dihydrocaffeoylglucose	Phenolic acids	Phenolic acids	-	3	159420	119190	145860	112340	151630	164660	104800	126060	88491	112530	132240	116690	163360	148960	119960	86063	103420	92604	131850	175360	130190	176810	172190	170540	171640	189010	--	--
Zmln000899	343.11	181.05	344.111	C15H20O9	[M-H]-	Syringaldehyde-4-O-glucoside	Phenolic acids	Phenolic acids	-	2	13082	27042	40578	37621	31779	31284	23365	35312	23051	29287	47033	39500	39497	50907	24923	39677	35286	18517	51803	55652	51379	56937	42379	49995	53926	55006	--	--
MWS1983	343.12	89.03	344.132	C12H24O11	[M-H]-	Maltitol	Others	Saccharides and Alcohols	585-88-6	3	29980	53499	45898	59707	29897	56104	14836	22620	46147	41267	50554	9343.2	45912	96535	22520	6355.5	37780	9017	31700	19550	15327	22924	17524	22088	17574	17552	--	--
MWSslk074	343.12	59.01	344.132	C12H24O11	[M-H]-	Lactitol	Others	Saccharides and Alcohols	585-86-4	2	533930	436250	684030	595060	535800	584400	827990	666210	623600	502630	630970	504770	470000	256970	479940	461870	776910	485930	961590	1234100	910860	1046000	1016100	1039600	1012400	1160500	--	--
mws0609	344.04	150	345.047	C10H12N5O7P	[M-H]-	Guanosine 3',5'-cyclic monophosphate	Nucleotides and derivatives	Nucleotides and derivatives	7665-99-8	1	740270	2295300	1996000	2363500	832930	2319800	1331500	2379600	1712500	1388200	1217800	3762200	417700	1782600	581350	737250	518900	746480	1650500	1744400	1811200	1999700	1974000	1770000	1963300	1678000	C00942	ko00230,ko01100
pmb0801	346.11	184.1	345.106	C14H19NO9	[M+H]+	4-Pyridoxic acid-O-glucoside	Others	Vitamin	-	1	62167	51573	56491	47742	54778	52913	65474	59723	57494	59042	67082	59528	62323	67926	44020	47939	47953	36054	63712	63576	60796	72843	56421	71845	63233	82193	--	--
Lmyp003381	347.13	301.13	346.126	C15H22O9	[M+H]+	3,4,5-Trimethoxyphenyl-1-O-glucoside	Phenolic acids	Phenolic acids	-	2	933830	912180	1123500	1021000	983370	998400	1146400	1109500	1003900	981550	928370	846710	795760	748170	696380	686900	859090	682630	551200	589840	623710	608230	604210	630280	591360	687600	--	--
mws0874	346.06	210.9	347.063	C10H14N5O7P	[M-H]-	3'-Adenylic Acid	Nucleotides and derivatives	Nucleotides and derivatives	84-21-9	1	374710	395820	354570	291090	247880	358360	209290	403930	363580	244050	376660	505150	232240	277080	288360	87162	177210	192550	265050	242480	238710	210420	191440	242510	217530	192890	C01367	ko00230,ko01100
pmb0981	348.07	136	347.063	C10H14N5O7P	[M+H]+	Adenosine 5'-monophosphate	Nucleotides and derivatives	Nucleotides and derivatives	61-19-8	1	15184000	12835000	13697000	8888100	14593000	8514900	10221000	13024000	11208000	7594000	5416400	5380400	10546000	7280700	8146500	746210	805040	774600	4535800	4906500	5491500	6903000	5243700	4826900	5134300	5566700	C00020	ko00230,ko00908,ko01100,ko01110
pmb0532	349.05	137.3	348.047	C10H13N4O8P	[M+H]+	Inosine 5'-monophosphate	Nucleotides and derivatives	Nucleotides and derivatives	131-99-7	3	1189900	950420	1125100	695110	1092900	649490	876760	962370	846140	611290	426210	409480	848840	651000	698010	71647	74198	69253	366020	392830	352050	505090	386560	459080	384740	450450	C00130	ko00230,ko01100,ko01110
pmb1562	351.25	146.9	350.246	C21H34O4	[M+H]+	1-Stearidonoyl-Glycerol	Lipids	Glycerol ester	-	1	9890.4	18997	24425	20923	19869	22037	22295	24139	19909	8395.2	14192	4611.2	11065	8062.3	2542.4	7306.1	16080	11302	15160	23414	21786	16554	14253	11117	18649	18821	--	--
MWStz224	353.15	177.06	352.142	C20H20N2O4	[M+H]+	N-Feruloylserotonin	Alkaloids	Plumerane	68573-23-9	2	87203	46693	245200	148850	180100	295710	416470	160260	618670	383860	618360	953210	435880	676880	189990	5632900	1237000	3412100	256120	604780	519490	371990	554510	624490	616110	608810	--	--
MWStz202	353.15	177.06	352.142	C20H20N2O4	[M+H]+	cis-Moschamine	Alkaloids	Plumerane	193224-24-7	2	109420	92599	182080	187460	108230	170060	384380	335100	448890	547110	523620	897410	306210	779020	118300	1943100	1518600	3672000	340730	527750	462020	404360	518860	803330	601570	450510	--	--
Lmhp011562	353.27	261.22	352.261	C21H36O4	[M+H]+	1-α-Linolenoyl-glycerol	Lipids	Glycerol ester	-	1	7210400	7040200	6946200	7552600	7744300	6437200	8381200	6837300	8943700	7478200	9549000	6411600	6310000	7504000	6152700	5329600	5901800	8618800	6672600	6563600	7453200	6829700	7744800	7638800	7420300	7450000	--	--
Lmhp011388	353.27	261.22	352.261	C21H36O4	[M+H]+	2-α-Linolenoyl-glycerol	Lipids	Glycerol ester	55268-58-1	1	7325800	6693000	6416300	7517100	7066100	6588500	8630300	6462100	9817500	6800900	9322800	6652200	6996000	7006800	6638000	4938700	6893400	8519600	6960400	6614100	7071300	6503000	8171900	7256400	7457900	7881300	--	--
pme1816	353.09	191	354.095	C16H18O9	[M-H]-	Neochlorogenic acid (5-O-Caffeoylquinic acid)*	Phenolic acids	Phenolic acids	906-33-2	1	30406	12744	327020	184170	298350	339350	329690	224050	213750	1493300	1552100	1762200	3072900	3677900	5934100	66001	35257	53498	440230	422620	389080	399550	439690	445310	432020	332290	C17147	--
mws0178	353.09	191.01	354.095	C16H18O9	[M-H]-	Chlorogenic acid (3-O-Caffeoylquinic acid)*	Phenolic acids	Phenolic acids	327-97-9	1	16499	19552	342120	241830	246630	401620	344120	259700	250000	1974100	1568200	1959800	3702300	3781300	5398800	67387	25858	65185	425110	383590	416900	421870	451700	477170	379130	485770	C00852	ko00940,ko00941,ko00945,ko01110
mws2108	353.09	191.05	354.095	C16H18O9	[M-H]-	Cryptochlorogenic acid (4-O-Caffeoylquinic acid)	Phenolic acids	Phenolic acids	905-99-7	2	17255	21430	269970	170620	178480	260560	206910	170550	206890	1253800	1241100	1186900	2471400	3076700	4047200	61749	33968	45603	295010	309910	259140	324010	322640	354120	316530	306760	--	--
mws1077	355.1	193.05	354.095	C16H18O9	[M+H]+	Scopoletin-7-O-glucoside (Scopolin)	Lignans and Coumarins	Coumarins	531-44-2	1	121790	60114	57694	83930	51740	75071	83735	102090	68215	59388	61587	88108	91483	66155	126400	83623	182750	91151	65925	87784	80692	79404	101260	87010	80962	81077	C01527	ko00940,ko01110
Lmhp112042	355.28	263.24	354.277	C21H38O4	[M+H]+	1-Linoleoylglycerol	Lipids	Glycerol ester	2277-28-3	1	997080	886270	937200	602410	480000	769240	1119300	873990	1050700	734680	881790	762780	706410	998110	1052700	632160	528640	752770	1338200	1385100	1441600	1435600	1678700	1531400	1514400	1588200	--	--
Lmhp012042	355.28	263.24	354.277	C21H38O4	[M+H]+	2-Linoleoylglycerol	Lipids	Glycerol ester	3443-82-1	1	1026000	860150	975330	635830	491540	765830	1145300	844560	1071600	787300	811820	797770	665040	965330	1052000	658950	544490	756330	1274900	1359100	1458600	1318700	1578500	1522100	1529700	1598500	--	--
Lmsn003318	355.1	175.04	356.111	C16H20O9	[M-H]-	1-O-Feruloyl-β-D-glucose	Phenolic acids	Phenolic acids	7196-71-6	1	1673100	2336900	1875500	1613200	1936500	1893700	2749300	2497200	3017100	9685900	6126100	8409300	5675100	11710000	14009000	9761300	10636000	8284400	13249000	12435000	11992000	13328000	12625000	13183000	12479000	14058000	C17759	--
Hmhn003518	355.1	175.04	356.111	C16H20O9	[M-H]-	4-O-β-D-glucosylferulic acid	Phenolic acids	Phenolic acids	-	1	2270100	3437200	2489900	1979200	2336800	2251400	3418600	3107800	4218100	11826000	8370600	10005000	7855100	13269000	17051000	10397000	12211000	9888000	15103000	15105000	15556000	15906000	14908000	16502000	15875000	15837000	--	--
Hmmn002544	355.1	193.05	356.111	C16H20O9	[M-H]-	Ferulic acid-4-O-glucoside	Phenolic acids	Phenolic acids	117405-51-3	1	178790	354030	265640	152360	70069	226970	230590	165110	222740	435940	273690	498660	438210	561130	684320	233850	266370	218960	353460	442920	233740	364930	260280	475170	302890	298930	--	--
Zmhn002334	355.1	193.05	356.111	C16H20O9	[M-H]-	6-O-Feruloyl-D-glucose	Phenolic acids	Phenolic acids	137887-25-3	2	495560	644030	531580	403870	433960	413900	686700	517340	815430	1068700	745250	1090100	541210	1026600	1232400	1064500	1248500	779310	1037200	981030	1029900	1088400	938520	947710	1028400	1107800	--	--
pmb0296	357.3	265.4	356.293	C21H40O4	[M+H]+	1-Oleoyl-Sn-Glycerol	Lipids	Glycerol ester	129784-87-8	2	932370	1138500	1064800	1481700	962700	1133700	2323200	936950	1448200	1277000	1967900	1183000	1224400	1403200	702230	1828800	2289900	2311600	1636100	1754900	1910800	1865600	2088300	1943300	2009800	2117100	--	--
Lmsp004450	359.15	131.05	358.142	C20H22O6	[M+H]+	Dehydrodiconiferyl alcohol	Phenolic acids	Phenolic acids	97465-82-2	3	33889	41500	45350	24166	55097	38992	32083	34105	41446	43940	30070	35880	32002	32034	37482	31233	24388	27730	22608	27630	33500	28410	35395	40532	29615	34651	--	--
pme0085	359.08	196.7	360.084	C18H16O8	[M-H]-	Rosmarinic acid	Phenolic acids	Phenolic acids	537-15-5	2	32398	27074	39283	21536	31356	27337	29931	28502	31959	31952	25139	38102	26802	26146	24612	35511	25777	20460	36649	19468	38475	24418	26823	37097	33489	32446	C01850	ko00350,ko01100
pmb0998	364.07	152.1	363.058	C10H14N5O8P	[M+H]+	Guanosine 5'-monophosphate	Nucleotides and derivatives	Nucleotides and derivatives	85-32-5	2	657620	414620	394320	308910	668160	297730	477710	497680	559320	295970	228420	189370	662530	385970	415000	30719	22334	9174	180340	256870	271920	351020	208240	213480	198320	205130	C00144	ko00230,ko01100
mws5040	365.11	203.05	364.078	C12H21O11Na	[M+H]+	Turanose	Others	Saccharides and Alcohols	547-25-1	1	45033	92113	68099	66091	108980	31513	182550	265950	138390	102960	75186	110580	56130	35335	140820	89527	76912	78273	215080	126210	122210	109710	123930	186140	282280	201990	C19636	--
pmb0752	369.12	177.1	368.111	C17H20O9	[M+H]+	3-O-Feruloylquinic acid	Phenolic acids	Phenolic acids	1899-29-2	3	8473.2	15429	3403	8324.4	18104	7517.1	7537.2	7630.9	38762	38198	36447	42130	37514	42374	62640	52211	60823	60238	60208	42897	53217	61771	51195	54548	62495	47285	C02572	--
pmn001695	371.1	249.06	372.106	C16H20O10	[M-H]-	Trihydroxycinnamoylquinic acid	Phenolic acids	Phenolic acids	-	2	72240	109980	105860	139760	86146	127610	135950	139490	156270	102010	88475	145650	45764	111930	33734	405150	350480	363860	130530	131120	156560	136410	121080	146910	140380	139590	--	--
Hmgn002833	371.11	297.11	372.12	C20H20O7	[M-H]-	4-Ketopinoresinol	Others	Others	-	1	39984	39737	35054	31228	28941	33231	44479	32196	44771	42306	39454	58614	36087	46764	50703	40960	37919	36413	41869	44252	41980	47274	43838	39455	44492	43100	--	--
Hmgn004693	371.11	327.03	372.121	C20H20O7	[M-H]-	8-Hydroxy-α-conidendrin	Lignans and Coumarins	Lignans	-	2	8805	4914.9	6696.2	6175.2	7098.3	6897.9	7808.4	8920.2	8214.6	8379.9	8178	10563	7907.4	8343.4	10771	8199.5	9756.7	8976	11222	12147	7069.2	10652	10870	10082	6296.8	13642	--	--
MWSHY0027	373.13	343.09	372.121	C20H20O7	[M+H]+	4',5,6,7,8-Pentamethoxyflavone	Flavonoids	Flavonoid	481-53-8	2	160370	183360	181090	179130	205850	209400	206300	211540	214060	235820	227510	247130	209030	198690	205480	210660	208400	194710	262130	263200	299710	311460	299470	296840	281650	294760	C10190	--
mws1313	373.13	312.1	372.121	C20H20O7	[M+H]+	5,6,7,3',4'-pentamethoxyflavone	Flavonoids	Flavonoid	2306-27-6	2	3191	2756	2490.1	8420.2	13882	13934	17075	16664	17777	5308	5853.7	3428.4	3964.9	4231.8	4987.2	1525.6	1919.5	2965.4	6512.2	6246.6	7264.2	8181.8	10206	7903.2	6683.2	8411.7	C10186	--
pmp000695	375.13	177.05	374.121	C16H22O10	[M+H]+	Swertiamarin	Terpenoids	Monoterpenoids	17388-39-5	2	1097800	1174300	1191700	1123800	1093200	1048900	1067200	1020400	1083600	1603700	1549800	1544800	1201000	1375600	1585200	1383200	1563800	1370500	1064300	1161100	1232900	1274800	1125600	1155100	1243300	1215700	C09800	--
Lmzn001983	375.13	135.05	376.137	C16H24O10	[M-H]-	D-Threo-guaiacylglycerol-7-O-β-D-glucoside	Phenolic acids	Phenolic acids	-	1	88788	85913	91645	95133	90931	100930	79635	68509	67330	135850	119950	88830	90760	97842	106950	106470	99608	115300	68433	73532	73196	68547	75648	72816	67896	68238	--	--
mws0232	377.15	243	376.138	C17H20N4O6	[M+H]+	Riboflavin (Vitamin B2)	Others	Vitamin	83-88-5	1	988860	645040	782760	930660	635100	958510	1606400	1407500	1088100	792840	1157700	799940	1049500	575880	525040	2577900	3303500	2053700	1457100	1489500	1516400	1700600	1680900	1526100	1758500	1543800	C00255	ko00740,ko01100,ko01110,ko02010
MWS0952	380.26	78.96	381.264	C18H40NO5P	[M-H]-	Dihydrosphingosine-1-Phosphate	Lipids	Sphingolipids	19794-97-9	3	1183.5	801.52	822.72	1397.9	1320.8	1081.7	733.04	2013.6	1463.9	2196.3	2175.2	2259.7	1296.4	1245.3	2872.2	1084	802.4	609.25	892.66	1793.2	2550.2	2357.2	2356.8	1555	2607.4	2180.4	C01120	ko00600,ko01100
pme3337	384.12	252	383.108	C14H17N5O8	[M+H]+	Succinyladenosine	Nucleotides and derivatives	Nucleotides and derivatives	4542-23-8	1	1721600	1800300	1638500	1643600	1212100	1418700	2404800	2621700	2678100	3008900	3422100	3373000	1276100	1465500	1510600	2904500	3689700	2196800	1749600	1899400	1940500	1924600	2044300	2098600	1949900	2129200	--	--
Lmbp003208	385.12	223.06	384.106	C17H20O10	[M+H]+	Fraxidin-8-O-glucoside	Lignans and Coumarins	Coumarins	-	2	14982	17792	12895	9959	31577	14590	19380	25109	28123	63898	52616	80706	46399	73354	67749	77202	46331	50106	47416	39334	45899	29327	43510	34192	62070	55313	--	--
pme1286	385.13	250	384.122	C14H20N6O5S	[M+H]+	S-(5'-Adenosy)-L-homocysteine	Amino acids and derivatives	Amino acids and derivatives	979-92-0	1	100700	122020	131770	131180	117690	112470	155300	164950	181420	158580	157870	211130	94069	119010	148680	101770	139540	92500	95660	112750	114920	115750	90984	122600	106680	107840	C00021	ko00270,ko01100,ko01230
Zmhn002227	385.11	223.06	386.121	C17H22O10	[M-H]-	4-O-Glucosyl-sinapate	Phenolic acids	Phenolic acids	-	2	8552.1	22825	22187	15983	9055.8	7275.1	14049	7807.4	10931	15452	18472	9852.8	4976.6	6694.9	17841	9660.9	20661	18534	23073	16675	28777	19538	17343	26055	20075	23291	C02919	--
HJN003	385.11	223.06	386.122	C17H22O10	[M-H]-	1-O-Sinapoyl-D-glucose	Phenolic acids	Phenolic acids	-	1	173540	188890	200750	179800	105590	176860	117260	172670	102230	139050	121120	197340	150100	133560	183210	191400	209550	195750	172690	199500	235440	180500	216990	251350	254960	227040	C01175	ko00940
pmn001423	385.19	223.13	386.194	C19H30O8	[M-H]-	Roseoside	Others	Others	54835-70-0	2	267060	315300	346670	261850	246290	304660	211160	274220	195760	300200	272650	376350	300400	260170	370290	463230	465410	469360	425240	443890	461550	461340	473880	494200	400760	469180	--	--
pmp001161	389.12	328.1	388.116	C20H20O8	[M+H]+	5-Hydroxyauranetin	Flavonoids	Flavonols	50439-46-8	2	621.23	519.82	827.54	1471.1	1149.1	1148.5	520.2	1156.7	1247.4	1878.7	942.81	839.18	308.49	1259.2	620.46	934.36	1251.6	1569.7	2104.6	1356.5	517.01	1406	1359.7	1777.5	1259.9	2282.3	--	--
Jmbp006554	389.12	359.07	388.116	C20H20O8	[M+H]+	ethyl rosmarinate	Phenolic acids	Phenolic acids	-	3	3545	5201	4122.9	5350.7	7729	4039.7	5773.8	10039	7508.5	6546.7	5571.1	5855.3	4793.5	5042	5002.2	7325.8	4144.7	4023.9	6865.8	9258.8	10914	9601.7	8369.4	11284	8520.2	9553.8	--	--
mws1565	389.14	209.08	388.137	C17H24O10	[M+H]+	Geniposide	Terpenoids	Monoterpenoids	24512-63-8	2	2017300	1785900	2479100	3549300	3774000	2101700	3509200	1906500	2273200	434060	678880	579720	310320	303350	233790	957880	953760	4279700	780200	997950	1323700	692730	1243000	826490	1024600	1198300	C09781	--
Hmmp003004	389.14	149.06	388.137	C17H24O10	[M+H]+	Vogeloside	Others	Others	60077-47-6	3	1402700	2637500	1696700	801110	990840	1902400	1136800	960680	1545400	267210	137670	256700	108200	231920	190960	504770	500550	522810	1052700	596150	376170	734730	1112700	939200	840830	606300	--	--
Lmwp011196	391.28	149.02	390.277	C24H38O4	[M+H]+	Bis(2-ethylhexyl)phthalate	Phenolic acids	Phenolic acids	117-81-7	2	14407000	14876000	12860000	19225000	14740000	8238600	9849700	13755000	9781400	21763000	13205000	15600000	16340000	6809500	14450000	15955000	51789000	23906000	833650	958360	973650	982850	951740	886330	994500	894140	C03690	--
Lmmp010562	391.28	149.02	390.277	C24H38O4	[M+H]+	Diisooctyl Phthalate	Phenolic acids	Phenolic acids	27554-26-3	1	13929000	14837000	13017000	19314000	15012000	8733800	10164000	13535000	10149000	22321000	13119000	15731000	16013000	6827900	15093000	16604000	52199000	24815000	876070	1010300	1032500	884650	964550	893790	1016200	905850	C14577	--
mws1051	400.14	251	399.145	C15H23N6O5S	[M+H]+	S-Adenosyl-L-methionine	Amino acids and derivatives	Amino acids and derivatives	485-80-3	3	41205	45564	39357	31312	45751	46191	40012	70464	28103	39957	57888	52549	38087	36908	31497	45564	23266	22597	30903	21393	31252	37254	52495	45448	29574	32247	C00019	ko00261,ko00270,ko00330,ko00908,ko01100,ko01110,ko01230,ko04122
Hmbn005456	399.11	163.04	400.116	C21H20O8	[M-H]-	1-O-Caffeoyl-3-O-p-coumaroylglycerol	Lipids	Glycerol ester	-	3	12532	14363	16209	17286	17468	17901	9490.3	9486.8	15078	13055	16573	15087	14514	14932	11473	25218	23693	26153	11030	10489	13265	9317.2	11978	13625	12305	10970	--	--
MWSHY0018	403.14	373.1	402.131	C21H22O8	[M+H]+	5,6,7,8,3',4'-Hexamethoxyflavone	Flavonoids	Flavonoid	478-01-3	2	127550	129660	128490	152690	164750	173890	191910	199460	193050	175970	172200	155650	141970	141600	150360	123540	127640	125420	178050	186730	201550	203280	204100	190210	192180	193650	C10112	--
Cmjn004337	401.14	269.1	402.153	C18H26O10	[M-H]-	Benzyl-(2''-O-xylosyl)glucoside	Phenolic acids	Phenolic acids	-	3	73816	67892	65062	46086	59227	61600	52242	67410	59760	38763	32879	49575	28826	24119	29642	30469	41425	32044	35738	46064	49105	48326	40307	48242	33728	43216	--	--
pmf0248	403.36	373.1	402.35	C27H46O2	[M+H]+	Delta-Tocopherol	Others	Vitamin	119-13-1	3	1804.8	2803.8	2538	3651.6	3587.5	2299.9	4546.1	4011.1	2675.7	2764.5	3558	5352.5	3362.5	3636	3394.3	3693.2	2505.5	2747.8	4365.6	4311.3	5220.2	4649.2	5164.7	4546.6	3669.9	4366.8	C14151	ko00130,ko01100,ko01110
pme3007	402.99	159	404.002	C9H14N2O12P2	[M-H]-	Uridine 5'-diphosphate	Nucleotides and derivatives	Nucleotides and derivatives	27821-45-0	1	88733	86323	117590	71378	93760	63950	125380	124360	151330	82429	91184	89962	83157	87003	75848	18441	21537	20443	57926	53978	61073	56189	60986	62791	59743	62757	C00015	ko00240,ko00908,ko01100
pmd0152	409.24	153	410.243	C19H39O7P	[M-H]-	LysoPA 16:0 (2n isomer)	Lipids	Glycerol ester	-	3	39321	32835	35649	52114	51525	22039	84686	15369	83236	19129	24366	25292	26392	15996	8269	2926.6	9655	11750	41296	15265	31646	36735	33401	5834.1	30795	38596	--	--
Lmbp003668	419.1	287.05	418.09	C20H18O10	[M+H]+	Kaempferol-3-O-arabinoside	Flavonoids	Flavonols	-	2	85162	160350	160760	131710	104800	160380	141670	176800	156320	238870	176430	347220	46828	182640	175170	345940	237730	238790	295870	327640	315040	306710	292930	330190	294020	303560	--	--
mws1089	421.1	241	422.083	C12H23O14P	[M-H]-	Sucrose-6-phosphate	Others	Saccharides and Alcohols	-	3	21269	10805	14059	19219	13512	7103.4	7287.3	19070	20181	5198	32581	16238	14636	11418	20955	2873.8	12005	3735.3	18022	14972	8550.7	17640	29098	30810	18601	25022	--	--
mws2523	421.08	241.1	422.083	C12H23O14P	[M-H]-	Trehalose 6-phosphate	Others	Saccharides and Alcohols	4484-88-2	1	6362.2	4041.9	4920.7	3657.9	5982.6	4487.7	11384	7141.9	8741.4	2771.6	8113.7	3096.4	7552.5	1928.7	2905.3	2777.9	1803	2131	8621.3	6032.3	7688.2	7492.6	8593.8	9893	6106	11509	C00689	ko00500,ko01100,ko01110
Cmyp005063	425.18	147.04	424.173	C21H28O9	[M+H]+	Grandidentatin	Phenolic acids	Phenolic acids	15732-48-6	1	217930	213990	213350	144610	158700	132200	200550	196250	244230	261820	270430	242740	332300	346030	299470	449210	399070	433800	235660	233450	183280	214090	223790	239940	226040	217920	C10463	--
pmb0864	426.26	285.24	425.254	C19H40NO7P	[M+H]+	LysoPE 14:0	Lipids	LPE	-	1	322860	302370	348080	209160	315270	177820	469890	262120	403660	141460	149010	144230	235290	179890	153650	75310	60805	66830	328740	330330	305930	339850	353920	350100	328200	344840	--	--
Lmhp008337	426.26	285.24	425.254	C19H40NO7P	[M+H]+	LysoPE 14:0(2n isomer)	Lipids	LPE	-	1	117320	98363	113690	64506	110830	53885	142480	80498	135970	46855	48316	47001	78750	48833	58120	12585	14159	15892	91915	91749	96018	102380	110550	94407	97593	100830	--	--
pmp000436	427.39	409.38	426.386	C30H50O	[M+H]+	Taraxerol	Terpenoids	Triterpene	127-22-0	2	17167	17473	22656	22228	26777	19609	30390	21978	24820	24496	23271	24199	20250	20620	35220	37867	40956	52363	32704	31193	34863	37217	34883	33707	34370	32048	C08637	ko00909,ko01110
pme2117	426	159	427.029	C10H15N5O10P2	[M-H]-	Adenosine 5'-diphosphate	Nucleotides and derivatives	Nucleotides and derivatives	58-64-0	3	397750	311740	332990	294330	514120	316860	234690	335530	334900	348950	282400	199230	380950	372000	304690	27722	24606	34535	71530	137940	167640	162600	168270	111140	151630	154780	C00008	ko00190,ko00195,ko00230,ko00908,ko01100,ko01110
mws0919	431.1	285	432.106	C21H20O10	[M-H]-	Kaempferol-3-O-rhamnoside (Afzelin)	Flavonoids	Flavonols	482-39-3	1	1584.6	9	1310.9	3705.7	1057.6	1322.1	9	3187	6634	12154	9554.2	18555	9	13758	13380	9784.8	9281.8	7369.7	6784.6	3964.7	14996	11912	12445	10456	8431.5	5170.4	C16911	ko00944
pmp000117	433.15	403.11	432.142	C22H24O9	[M+H]+	3,5,6,7,8,3',4'-Heptamethoxyflavone	Flavonoids	Flavonols	1178-24-1	2	743.5	2139.4	1841.1	3624.6	8345.7	5248.2	10932	8126.3	10110	6244	5702.8	5156.8	2491.5	1591.4	3528.8	2561.2	2967.3	1307.1	7844.5	6897.3	7318.8	7840.2	7245.3	7808.9	8039.5	6371	--	--
Lmtn002324	431.15	269.1	432.163	C19H28O11	[M-H]-	Benzyl-(2''-O-glucosyl)glucoside	Phenolic acids	Phenolic acids	-	2	25127	21574	25268	30734	29235	35872	39136	46577	34850	53290	34550	41408	28365	46298	16560	172280	120500	147160	24749	34194	56856	52340	51549	32090	53223	29379	C17564	--
mws2186	435.09	303	434.085	C20H18O11	[M+H]+	Avicularin(Quercetin-3-O-α-L-arabinofuranoside)	Flavonoids	Flavonols	572-30-5	1	21729	6424.2	5571.8	15605	3917.2	9034	3942	5082.8	120500	305750	260090	591400	128950	262960	234800	1109600	598050	758830	231060	230380	247040	247950	302860	274350	268560	245660	--	--
Lmdp003509	435.09	303.06	434.085	C20H18O11	[M+H]+	Quercetin-3-O-xyloside (Reynoutrin)	Flavonoids	Flavonols	549-32-6	3	41247	6726	23537	11666	10924	6765	14728	16572	162030	418860	347150	665980	150830	367020	284360	1309900	845850	801630	284070	290960	292770	293780	338850	321580	322590	299880	--	--
MWStz103	399.15	250.09	434.114	C15H23ClN6O5S	[M-Cl]+	S-(5'-Adenosyl)-L-methionine chloride	Amino acids and derivatives	Amino acids and derivatives	24346-00-7	1	138260	113460	91516	117000	111980	130980	161980	213210	111770	105620	105900	207100	86601	111620	108970	188030	181390	91702	75385	112840	115580	109300	130470	134260	64079	91911	--	--
HJN087	433.12	271.06	434.121	C21H22O10	[M-H]-	Naringenin-4'-O-glucoside	Flavonoids	Dihydroflavone	-	3	38148	52117	53135	45159	37886	64948	47380	45337	50567	51274	33870	49379	27067	38841	32789	46068	45738	39787	33813	43475	51479	39599	40656	25854	41808	44502	--	--
Cmzn005251	433.11	271.06	434.121	C21H22O10	[M-H]-	6-O-Caffeoylarbutin	Phenolic acids	Phenolic acids	136172-60-6	3	21345	26404	35155	43579	30096	31733	32024	34647	30072	43656	47308	61556	24676	49234	41032	43480	33425	37507	34649	19894	33338	13566	24602	54052	27856	28314	--	--
mws2118	435.13	166.7	436.137	C21H24O10	[M-H]-	Phloretin-2'-O-glucoside (Phlorizin)	Flavonoids	Chalcones	60-81-1	1	40812	68792	69277	62083	40027	61014	53996	53650	62991	90723	60378	86468	32080	67178	90734	54181	35504	57752	41516	46621	38274	39949	48534	55892	52289	40900	C01604	ko00941,ko01110
Lmhp008440	438.26	297.24	437.254	C20H40NO7P	[M+H]+	LysoPE 15:1	Lipids	LPE	-	2	35870	32211	30711	25003	30168	21822	48578	29466	37581	15749	19037	19295	37799	27251	26059	15579	18244	13907	67516	83310	86723	76392	86067	90797	74292	89596	--	--
Lmhp008273	438.26	297.24	437.254	C20H40NO7P	[M+H]+	LysoPE 15:1(2n isomer)	Lipids	LPE	-	2	10295	9479.4	12654	7195.6	9528	7912.7	13467	9530.5	12082	4680.2	6726.3	6411	8293.9	6385.9	8688.6	3872.8	4657.9	4021.1	23583	24451	29728	27455	20044	28670	25088	23731	--	--
pmb0862	440.28	184.07	439.27	C20H42NO7P	[M+H]+	LysoPC 12:0	Lipids	LPC	20559-18-6	3	6914.4	11531	14713	5691.1	8525.5	5670.1	11211	9778.1	13772	37082	32919	34732	6858.6	5731.3	5742.8	5223.6	2639.4	3703.6	13012	11216	13324	12237	12535	11978	11712	12696	--	--
Lmhp009187	440.28	299.26	439.27	C20H42NO7P	[M+H]+	LysoPE 15:0	Lipids	LPE	-	1	283940	233220	275050	167640	239890	138130	346380	211420	288190	92228	101360	74315	181760	113420	116130	40469	40937	42049	399200	448890	425740	423960	485290	461340	467590	474810	--	--
Lmhp008885	440.28	299.26	439.27	C20H42NO7P	[M+H]+	LysoPE 15:0(2n isomer)	Lipids	LPE	-	1	112470	89457	105640	41705	90491	48266	154340	67746	102040	31463	30232	27728	59770	33297	43355	8141.2	10753	12253	137060	160490	144280	144920	170920	153930	161690	149410	--	--
pmp000438	443.39	425.38	442.381	C30H50O2	[M+H]+	Betulin	Terpenoids	Triterpene	473-98-3	3	19067	15473	80552	2246.4	848.45	1462.3	35577	2455.9	61823	6256.6	16928	61111	3613.4	3348.6	7556.6	277580	9151.1	285770	58897	65541	65770	64886	69998	64365	60824	65518	C08618	--
pme1014	445.3	341.3	444.303	C31H40O2	[M+H]+	Menatetrenone (Vitamin K2)	Others	Vitamin	11032-49-8	3	92946	83353	84490	116090	44969	92252	83346	87199	97077	85468	94280	91706	56562	120580	101470	106130	80906	114640	102530	100730	105310	118050	115850	116460	120490	124420	--	--
pmn001338	445.08	283	446.085	C21H18O11	[M-H]-	Rhein-8-O-glucoside	Quinones	Anthraquinone	34298-86-7	2	15818	11486	15238	16244	17395	19796	7920	9081.5	10130	9583.8	15709	10637	15849	7332.2	12638	3920.5	2830.5	4540.8	9782.5	17266	15844	9844.8	11228	14302	10792	7597.5	--	--
Lmjp004533	447.13	285.08	446.121	C22H22O10	[M+H]+	Kisasagenol A Triacetate	Terpenoids	Terpene	-	1	100220	187650	150750	226440	121450	212690	174900	225310	101950	28509	24532	42449	13706	21671	23687	9732.7	7310.6	11311	111240	143890	116930	115230	123390	127580	154590	115080	--	--
Lmhp007836	448.25	307.23	447.239	C21H38NO7P	[M+H]+	LysoPE 16:3	Lipids	LPE	-	2	531690	537930	594320	321730	474250	306040	549910	360610	584690	236990	283880	217470	365420	346710	303800	34225	27833	55994	227920	230300	211450	236810	245560	240010	221860	220780	--	--
Hmcp002316	449.11	317.06	448.1	C21H20O11	[M+H]+	Isorhamnetin-3-O-arabinoside	Flavonoids	Flavonols	-	1	19660	8809.4	4868.5	8083	5296.2	5161.7	4445.2	17272	87058	324370	275540	633950	84778	289250	218450	1115800	516090	674510	268580	275940	284920	302320	306720	296400	267710	287400	--	--
pme2459	449.11	287.2	448.101	C21H20O11	[M+H]+	Luteolin-7-O-glucoside (Cynaroside)	Flavonoids	Flavonoid	5373-11-5	1	9777600	11409000	11356000	10684000	9000800	11161000	15155000	9811600	8804800	2128500	2171500	2895100	2005300	2406400	897190	3099100	2778200	2838600	4234000	5177300	5472900	4947000	5224700	5623600	5176900	5744300	C03951	ko00944
Hmpp003270	449.11	287.05	448.101	C21H20O11	[M+H]+	Luteolin-4'-O-glucoside	Flavonoids	Flavonoid	6920-38-3	1	560650	832020	776820	651430	540090	1127100	510450	1028300	1210200	2833900	1835600	2690600	777530	2364100	2787300	2381400	2789000	2973900	1863200	2734700	2438000	1840200	1817500	1881700	1842200	2363900	--	--
mws0913	447.09	285	448.101	C21H20O11	[M-H]-	Kaempferol-3-O-galactoside (Trifolin)	Flavonoids	Flavonols	23627-87-4	1	95838	202550	172780	151720	141680	153520	223790	173430	118450	29088	42586	111620	45581	52874	49938	37612	30562	21330	91274	93954	90613	98196	83929	80333	72144	79965	C12626	ko00944
Xmyp005654	449.11	287.06	448.101	C21H20O11	[M+H]+	Kaempferol-4'-O-glucoside	Flavonoids	Flavonols	-	1	625810	858420	824470	976150	549640	859930	693160	1443700	1017600	1979100	1167000	2305300	627480	1340800	2312700	2402200	2741700	3116700	2382400	2353300	2243500	2501400	2121600	2273800	2118900	2256500	--	--
mws0089	447.09	285.04	448.101	C21H20O11	[M-H]-	Kaempferol-7-O-glucoside*	Flavonoids	Flavonols	16290-07-6	1	67726	72756	72493	61026	68927	90004	87968	82392	64314	91644	99017	101850	40024	69282	44496	97773	61548	80230	79299	74661	77199	77007	78481	84102	56949	67060	--	--
MWS20147	449.11	287.06	448.101	C21H20O11	[M+H]+	Luteolin-3'-O-glucoside	Flavonoids	Flavonoid	5154-41-6	1	197000	208100	273440	330250	234040	339130	401180	74947	222370	608030	267950	876580	77591	345550	432650	432700	327540	142340	699490	443270	419640	698240	668480	549470	533410	405220	--	--
mws1299	449.11	299.2	448.101	C21H20O11	[M+H]+	Luteolin-8-C-glucoside (Orientin)	Flavonoids	Flavonoid carbonoside	28608-75-5	3	10286	50351	20082	19406	7969.8	28721	29915	26857	11582	14792	6568.8	5498	12774	5834.5	3716.2	1562	4270	8382.8	18474	11033	12093	15786	6649.8	11614	6387	18196	C10114	--
mws2209	449.11	287.06	448.101	C21H20O11	[M+H]+	Kaempferol-3-O-glucoside (Astragalin)*	Flavonoids	Flavonols	480-10-4	1	544160	974100	728090	789960	410530	1240600	567920	952810	1085400	2702300	2258600	2878300	919460	2159900	2480100	2635900	2036300	2585900	2012400	2350500	2026900	2107700	1758000	1804300	1892800	2058700	C12249	ko00944,ko01110
Zmhn001905	447.09	285.04	448.101	C21H20O11	[M-H]-	HydroxyAloe-emodin-8-O-glucoside	Quinones	Anthraquinone	-	2	101150	179600	191680	142250	98507	187060	155710	209800	91457	33826	58967	80322	23250	41018	57882	43718	24716	42968	71004	78972	62302	74563	118460	104800	98452	101120	--	--
Lmyn006922	447.13	285.08	448.137	C22H24O10	[M-H]-	Sakuranin	Flavonoids	Dihydroflavone	529-39-5	2	27541	24090	24070	21294	20052	20724	26458	24857	30598	29972	30708	28033	18610	30342	22781	32127	33737	33469	28609	24041	23029	22899	21220	21351	18186	25731	C17391	--
Lmsp004301	451.12	289.07	450.116	C21H22O11	[M+H]+	3',5,5',7-Tetrahydroxyflavanone-7-O-glucoside	Flavonoids	Dihydroflavone	-	2	95361	196850	290650	232990	82389	257150	241270	231820	224780	85031	40223	112670	84073	111190	69686	40766	43811	118910	222700	222080	137860	122580	114290	116790	149520	93010	--	--
mws0057	451.12	289	450.116	C21H22O11	[M+H]+	Eriodictyol-7-O-glucoside	Flavonoids	Dihydroflavone	38965-51-4	2	127080	184880	163380	219370	147770	197770	256750	148160	179080	25530	23615	46440	49453	35695	48884	31663	27050	54430	119340	116180	87974	109630	124880	69121	72351	92477	--	--
Lmtn002796	449.1	287.05	450.116	C21H22O11	[M-H]-	Aromadendrin-7-O-glucoside	Flavonoids	Dihydroflavonol	28189-90-4	3	30305	35267	29870	31757	28292	31878	32194	30378	28248	30612	22242	17152	48684	32618	54791	11097	5119.8	13820	28778	32206	42583	33955	43139	35591	36342	32180	--	--
HJN086	449.11	287.06	450.116	C21H22O11	[M-H]-	Eriodictyol-3'-O-glucoside	Flavonoids	Dihydroflavone	-	3	7274.6	9276.6	6005.9	5574.3	3607.7	9243.7	1287.5	3563	5939.1	16824	11694	29010	12287	24177	24957	142590	89418	107660	13183	17900	24441	19812	25582	29860	28992	17336	--	--
MWSmce674	451.36	89.06	450.35	C31H46O2	[M+H]+	Phylloquinone (Vitamin K1)	Others	Vitamin	84-80-0	2	18473	15006	17031	17109	20656	14908	13867	14666	18814	14995	14803	13104	20452	18382	16110	13934	14965	15166	12015	14944	15747	13462	17858	17752	17795	19472	--	--
Lmhp008763	452.28	311.26	451.27	C21H42NO7P	[M+H]+	LysoPE 16:1(2n isomer)	Lipids	LPE	-	1	1134800	944090	1024200	590700	911010	522130	1177700	690080	1158300	417580	430620	498010	734580	672060	590380	157170	176910	196500	1002100	1085400	1112200	1077300	1140500	1127800	1146100	1098700	--	--
Lmhp009034	452.28	311.26	451.27	C21H42NO7P	[M+H]+	LysoPE 16:1	Lipids	LPE	-	1	1106500	993350	1025100	607550	919660	513020	1234100	741180	1084100	407070	518250	461750	723000	654380	584270	154400	173790	224460	1014400	1094100	1078400	1189200	1156500	1121000	1107000	1102200	--	--
Lmqn005404	451.09	331.07	452.095	C20H20O12	[M-H]-	4-Hydroxybenzoyl-1-O-(6''-O-galloyl)glucoside	Phenolic acids	Phenolic acids	-	2	81398	62115	66382	54760	62091	57808	47185	47869	58718	75573	74865	67508	94490	73036	49042	24688	38533	29436	38331	39479	40721	34350	42381	39380	35921	38483	--	--
pmb0876	454.29	313.27	453.286	C21H44NO7P	[M+H]+	LysoPE 16:0	Lipids	LPE	53862-35-4	1	818310	664630	669680	448720	666100	365210	917420	500470	776530	206340	233570	195170	378600	307470	285450	88535	72015	84966	627370	597920	588340	591270	620740	629690	581360	623460	--	--
pmd0160	454.29	313.27	453.286	C21H44NO7P	[M+H]+	LysoPE 16:0(2n isomer)	Lipids	LPE	-	1	756370	622660	652910	405380	668590	370800	900210	470460	748900	190230	217940	200250	335930	313430	289860	80585	68380	82845	566890	564950	597450	534660	599180	615720	532490	586480	--	--
Lmhp005872	455.22	177.05	454.21	C25H30N2O6	[M+H]+	Diferuloylcadaverine	Alkaloids	Phenolamine	-	3	9349.1	9467.9	10588	10936	955.88	13119	8210.2	12723	14370	5051.7	496.57	4177.6	2735.6	496.26	3592.7	3564.7	3496.1	3218.1	42104	37932	44835	39152	58083	43447	45449	37825	--	--
MWS5083	455.1	96.97	456.105	C17H21N4O9P	[M-H]-	Flavin Single Nucleotide(FMN)	Nucleotides and derivatives	Nucleotides and derivatives	6184-17-4	2	1318900	1149000	1306400	1219600	1355000	1418900	1300800	1540000	1536900	1217600	1292000	1032900	1355600	1068100	1118400	530090	700080	513190	1061500	1054300	1005400	1335400	1133300	1025200	1001100	1204000	C00061	ko00190,ko00740,ko01100,ko01110
mws4053	455.35	455.35	456.36	C30H48O3	[M-H]-	Ursolic acid	Terpenoids	Triterpene	77-52-1	2	445.59	849.68	255.32	2833.8	1108.9	651.51	878.38	1814.1	9	2029.7	1025.4	515.02	9	2182.9	534.12	830.83	351.04	187.72	40121	42579	40220	44989	45957	41667	47307	48092	C08988	--
pmn001700	455.35	455.35	456.36	C30H48O3	[M-H]-	24,30-Dihydroxy-12(13)-enolupinol	Terpenoids	Triterpene	-	1	22806	17643	31011	12803	19538	15940	37889	33118	20733	24314	25111	15697	42917	24375	29269	32295	25944	22181	40277	60883	74844	76531	97990	80359	73089	85394	--	--
HJN110	455.36	455.36	456.36	C30H48O3	[M-H]-	Betulinic acid	Terpenoids	Triterpene	472-15-1	3	699.53	499.85	175.98	2074.5	650.37	200.56	224.28	681.78	604.13	1154.8	1112.5	401.2	726.9	800.48	669.41	1151.5	557.8	232.25	36768	33967	29567	36212	37388	37215	40650	40925	C08619	--
MWSmce052	455.36	455.36	456.36	C30H48O3	[M-H]-	3-Epiursolic acid	Terpenoids	Triterpene	989-30-0	2	2987.3	2370.5	4062.7	1201.8	1070.2	3147	637.99	441.65	10249	279.92	638.95	15940	575.2	476.17	895.44	332.34	416.4	1761.9	20951	19949	20577	20159	20135	23288	18134	23473	--	--
mws0034	457.08	169.01	458.085	C22H18O11	[M-H]-	Epigallocatechin-3-gallate	Flavonoids	Flavanols	989-51-5	3	17680	5855.2	2689	3576.5	9709.8	2317.5	8604	1775	21773	1348.5	8244.2	19539	907	10993	8678.2	5070.8	5087.5	11595	14954	12384	12201	8045	5535	8559	7864	12129	C09731	--
pmb2654	460.1	117.9	461.153	C19H27NO12	[M-H]-	Anthranilate-1-O-Sophoroside	Phenolic acids	Phenolic acids	-	3	59964	68632	46759	54176	39577	49765	88289	55554	75443	64863	62627	149090	55541	42169	48150	71645	112570	67651	46891	71830	33543	28734	39955	60283	33846	49010	--	--
MWSHY0121	463.09	287.06	462.08	C21H18O12	[M+H]+	Luteolin 7-O-glucuronide	Flavonoids	Flavonoid	29741-10-4	1	3046000	2257900	2946600	2840500	2410300	2587700	3054600	2048700	2420500	2143000	3071400	2770800	2877600	2479000	2779800	1982300	2657600	2680600	2243100	2363800	2322800	2688000	2707600	2194200	1749600	1786100	C03515	ko00944
Lmzn001894	461.07	285.04	462.08	C21H18O12	[M-H]-	Kaempferol-3-O-glucuronide	Flavonoids	Flavonols	22688-78-4	1	3289700	4541800	4790200	6596300	5644000	6253600	5076200	5542400	4014800	1316300	1077800	1564000	798740	1401600	886320	2108700	1932900	1619800	3673700	3152800	3532300	3630000	3151900	2337000	3136900	3007100	--	--
MWSHY0035	463.09	287.06	462.08	C21H18O12	[M+H]+	Scutellarein-7-O-glucuronide (Scutellarin)	Flavonoids	Flavonoid	27740-01-8	2	2234700	2583300	2663400	2461400	2834400	3365600	2401600	2726100	2031100	3039100	3076800	2202000	2094000	1942200	2466300	1936500	2261000	2536000	1998300	1943800	2569100	2682100	2980200	2460300	1985200	2293100	--	--
Lmmp003767	463.09	287.05	462.08	C21H18O12	[M+H]+	Kaempferol-7-O-glucuronide	Flavonoids	Flavonols	-	1	16787000	21444000	24114000	23381000	19439000	19926000	26976000	16242000	17024000	612530	99962	623830	226490	223000	247170	210800	721090	364450	9519500	11066000	12144000	8541600	11099000	10959000	11837000	8842400	--	--
pmp000579	463.12	301.07	462.116	C22H22O11	[M+H]+	Diosmetin-7-O-galactoside	Flavonoids	Dihydroflavone	-	3	154820	203410	193430	217200	122010	180660	160200	126520	134560	284760	102840	295840	114910	120450	144990	581060	1001700	434530	283090	336950	288270	259860	312800	284080	300200	306350	--	--
Hmcp002539	463.12	317.06	462.116	C22H22O11	[M+H]+	Isorhamnetin-3-O-rhamnoside	Flavonoids	Flavonols	-	3	509.31	1587.7	2168.9	980.41	1588.5	2016.9	892.67	578.39	5029	95679	85224	174100	5755.5	122510	80736	465750	142180	280930	81435	84024	76463	87923	99561	90892	84203	85091	--	--
pmp000120	463.12	427.1	462.116	C22H22O11	[M+H]+	Diosmetin-6-C-glucoside	Flavonoids	Dihydroflavone	-	3	279950	267610	207030	230580	408840	212290	204220	347320	347580	104200	105540	122000	70012	127140	100230	140970	118460	141880	200610	245400	204050	219550	248510	229480	221820	205040	--	--
pmp000233	463.12	313.07	462.116	C22H22O11	[M+H]+	Swertiajaponin	Flavonoids	Flavonoid carbonoside	6980-25-2	3	168180	181090	194000	198000	191110	210420	167710	231550	104700	58218	57131	37405	57120	51602	41957	9043.2	7806.2	7830.8	108780	98427	130190	126290	102640	125500	136910	142390	C10187	--
MWS0155	462.07	96.97	463.074	C14H18N5O11P	[M-H]-	Adenylocuccinic Acid	Organic acids	Organic acids	19046-78-7	3	29262	23171	33438	21507	18670	19458	18080	34329	39625	30402	33622	19994	22553	29058	17209	1223.5	735.82	743.1	22348	13637	13876	22693	18847	11146	13999	17799	C03794	ko00230,ko00250,ko01100
Lmdp003286	465.1	303.06	464.095	C21H20O12	[M+H]+	Isohyperoside	Flavonoids	Flavonols	35589-21-0	1	637140	369760	466410	434690	305920	435970	369220	416710	798060	2580700	1497900	2607000	840780	1819900	1798900	3357100	2812800	2912700	1468800	1445000	1623100	1489400	1653800	1565600	1500600	1728600	--	--
mws0091	463.09	300.03	464.095	C21H20O12	[M-H]-	Quercetin-3-O-glucoside (Isoquercitrin)*	Flavonoids	Flavonols	482-35-9	1	36872	10165	6277	16377	15788	6827.8	1721	11518	90134	341500	185260	296820	97730	227660	255630	140760	238610	191970	182010	177200	216230	235290	245380	191350	237360	204230	C05623	ko00944,ko01100,ko01110
mws0061	463.09	300	464.095	C21H20O12	[M-H]-	Quercetin-3-O-galactoside (Hyperin)	Flavonoids	Flavonols	482-36-0	1	51244	14103	8587.8	7431.5	12974	8523.8	4572.5	16134	125600	380570	180540	484980	171280	263400	304710	207350	309020	307450	243640	327640	294730	273380	281910	245080	335800	291150	C10073	--
Hmcn001884	463.09	301.03	464.095	C21H20O12	[M-H]-	6-Hydroxyluteolin 5-glucoside	Flavonoids	Flavonoid	-	1	33294	6854	5145	9368	8751.2	11685	3396	6844	122760	228510	216580	358680	116220	255570	288660	115290	275620	218600	234170	209660	321940	272490	241100	254460	197850	279250	--	--
pmp001309	465.1	303.1	464.095	C21H20O12	[M+H]+	6-Hydroxykaempferol-7-O-glucoside	Flavonoids	Flavonols	-	1	2365900	245310	199940	444620	263450	458830	210840	772720	3999800	6492100	6168600	8293000	6346500	6028900	3865600	12644000	12949000	11918000	2190300	2684000	2328900	2415200	3231700	2946600	3279400	3405700	--	--
Smgp004575	465.1	303.05	464.095	C21H20O12	[M+H]+	Quercetin-5-O-glucoside	Flavonoids	Flavonols	-	2	447570	348360	432590	417160	313850	433970	298320	417850	948020	2681400	1556600	2652400	983060	1696800	1863100	3334300	3114400	2932300	1298200	1320400	1621200	1379500	1523600	1401400	1519100	1270900	--	--
mws1329	463.09	300.7	464.095	C21H20O12	[M-H]-	Quercetin-7-O-glucoside*	Flavonoids	Flavonols	491-50-9	1	13824	8993.2	7729.8	18867	8421.8	17032	8905.8	4758	16926	140090	96534	241870	17281	124350	171070	277570	112980	166080	114970	107720	115470	113500	116840	119630	116020	116580	C12639	--
mws0856	463.09	301	464.095	C21H20O12	[M-H]-	Quercetin-4'-O-glucoside (Spiraeoside)	Flavonoids	Flavonols	20229-56-5	1	33874	5085.8	7945	12408	7889.2	1725	8527	10482	70130	202880	143830	254560	87828	164420	171230	139570	181650	159820	197900	134330	181710	212730	250650	174400	235050	195390	--	--
Lmzp002365	465.14	303.09	464.131	C22H24O11	[M+H]+	Hesperetin-7-O-glucoside	Flavonoids	Dihydroflavone	31712-49-9	3	198260	154730	127150	114590	127840	173960	141510	122300	452630	372920	378280	308680	224040	350620	312280	587230	353890	299520	256270	264910	287670	259820	285710	232180	274380	231330	C16422	ko00941
pme1598	463.12	301	464.132	C22H24O11	[M-H]-	Hesperetin-5-O-glucoside	Flavonoids	Dihydroflavone	69651-80-5	3	36316	12952	11862	10391	6728	9061.2	1735.5	7757.5	75476	209440	108620	216250	74832	149740	185240	111600	140430	235790	207170	187700	184560	179270	150480	142740	148060	154970	--	--
Lmhp009769	466.29	325.27	465.286	C22H44NO7P	[M+H]+	LysoPE 17:1	Lipids	LPE	-	1	19362	11407	12904	8125.2	9041.9	12396	15779	10852	14657	8938.6	7744.5	12134	17696	9603.4	8211.3	8179.9	13047	10609	51576	50035	47008	43225	48746	46543	48823	49384	--	--
Lmhp009464	466.29	325.27	465.286	C22H44NO7P	[M+H]+	LysoPE 17:1(2n isomer)	Lipids	LPE	-	1	205250	182060	199560	107720	177940	104290	253420	169950	211200	80393	81505	83986	107860	108520	96560	37110	39748	42251	256920	245030	247090	248860	264300	286310	238800	276030	--	--
Xmsn002700	465.13	303.06	466.111	C21H22O12	[M-H]-	Taxifolin-3'-O-glucoside	Flavonoids	Dihydroflavonol	31106-05-5	3	58646	35161	31264	47114	56350	45314	41818	39195	38335	55772	62595	72599	45828	40200	48514	30932	39465	30059	31362	23574	26867	31504	44432	19589	37709	35382	--	--
Lmhp010162	468.31	327.29	467.301	C22H46NO7P	[M+H]+	LysoPE 17:0	Lipids	LPE	-	3	44924	42811	38704	28420	31155	22542	59384	39839	49913	21403	19533	19057	24677	25508	16671	16058	10832	16119	66961	66756	52769	71834	75594	60079	78239	61724	--	--
pmd0130	468.31	184.07	467.301	C22H46NO7P	[M+H]+	LysoPC 14:0	Lipids	LPC	20559-16-4	1	1166200	1330700	1401400	1081000	1182200	1000600	1664600	1354000	1624700	989590	1009900	1115000	855500	924910	873200	1017000	945340	834060	1154000	1215300	1275500	1243800	1321600	1280800	1257300	1273700	--	--
Hmjn008136	469.33	469.33	470.34	C30H46O4	[M-H]-	Camaldulenic acid	Terpenoids	Triterpene	71850-15-2	2	7044.8	1920.5	806.45	1555.9	505.94	5166.9	2134.7	434.93	594.62	1041.4	1846.3	750.45	3389.6	848.74	1289	1962.2	1054.7	1457.4	88529	83433	81122	86175	82153	87505	79919	82459	--	--
pmn001704	469.33	423.33	470.34	C30H46O4	[M-H]-	2,3-Dihydroxy 5(6),12(13)diene ursolic acid	Terpenoids	Triterpene	-	3	173.82	305.32	118.43	172.23	176.55	88.42	280.23	351.97	118.43	176.48	58.88	175.72	236.44	58.848	116.84	120.65	175.62	169.14	3183.5	4755.8	4387.3	3163.8	3633.1	3921.6	2523.7	3080.5	--	--
Lmsn012627	469.33	423.33	470.34	C30H46O4	[M-H]-	2α,3α-Dihydroxyurs-12,18-dien-28-oic acid	Terpenoids	Triterpene	-	2	172.56	112.2	120.2	88.011	351.86	234.42	86.625	232.85	232.72	112.27	55.44	140.58	238.23	117.56	234.52	175.99	124.42	115.86	3475.2	2517	3329.1	3920.4	2318.4	2997.7	3570.1	3813.3	--	--
Lmmn009932	469.37	469.37	470.376	C31H50O3	[M-H]-	Ambolic acid	Terpenoids	Triterpene	13878-93-8	2	15640	28633	21409	44338	17863	32270	21369	26186	16260	19432	12003	9028.7	19689	15456	12202	9241.1	10154	10097	8104.6	8583	11249	9161.9	10390	12443	7722.8	8966.5	--	--
pmn001706	471.35	471.35	472.355	C30H48O4	[M-H]-	2-Hydroxyoleanolic acid	Terpenoids	Triterpene	26707-60-8	2	6317.9	8506.8	2213.4	13849	11114	5353.8	190810	2605.5	8192.1	12462	73646	1250.3	31221	2502.1	1722.4	7208.7	2700.2	2031.1	56252	58677	64785	62478	56770	62741	49980	49035	--	--
Smpn011792	471.34	471.34	472.355	C30H48O4	[M-H]-	2,3-dihydroxy-12-ursen-28-oic acid	Terpenoids	Triterpene	-	3	997.15	1275	10297	37445	1785	1598.7	1547	12124	2580.4	7233	7194.9	4330.5	4395.5	1128.5	4760.3	2564.7	2738.4	9397.7	1211800	1199700	1191100	1228900	1169800	1224700	1158600	1173100	--	--
mws1610	471.35	471.35	472.355	C30H48O4	[M-H]-	Maslinic acid*	Terpenoids	Triterpene	4373-41-5	3	8960	7402	3442.1	16481	13602	9011	7869.8	1379.4	3469.9	6525.4	1350.2	6648.5	1029.6	13244	4947.4	3518.8	4769.5	1757.1	69056	68587	63502	55163	69328	55943	63518	63207	C16939	--
Zmpn008194	471.35	471.35	472.355	C30H48O4	[M-H]-	Corosolic acid*	Terpenoids	Triterpene	4547-24-4	3	11128	6601.3	5391.5	13224	14583	5235.7	5014.9	5616.1	8265	3854.2	5626.9	3330.4	5796.2	12982	3494	3449.1	6411.8	5938.3	63804	65590	67376	57059	64536	56882	65446	66022	--	--
Lmzn006284	471.35	471.35	472.355	C30H48O4	[M-H]-	2α-Hydroxyursolic acid	Terpenoids	Triterpene	-	2	39711	18356	24199	57861	45181	25277	184120	14341	62493	7438.4	71222	36452	35641	6566.6	10803	12982	38934	48327	47571	49995	48320	53523	48994	60013	45028	41615	--	--
Hmbn005207	471.35	471.35	472.355	C30H48O4	[M-H]-	Hederagenin	Terpenoids	Triterpene	465-99-6	3	2277.6	6789.7	653.37	45406	16591	5807.2	1568.6	5270.7	5769.7	26011	4290.9	7016.7	4479.4	2640.3	3814.5	1947.3	4930.6	4908.8	1216000	1246100	1261400	1295500	1288000	1310200	1143100	1274300	--	--
Lmzn006169	471.35	471.35	472.355	C30H48O4	[M-H]-	Pomolic acid	Terpenoids	Triterpene	13849-91-7	1	181600	85171	146560	255480	297060	104100	754520	118340	269480	63781	413220	107260	183180	77828	71144	161270	297540	391780	186950	159210	173480	175490	164490	167310	169480	195490	--	--
pmb1912	474.17	327	473.166	C20H23N7O7	[M+H]+	10-Formyltetrahydrofolic Acid	Alkaloids	Alkaloids	2800-34-2	1	1294100	1762400	1743000	2096800	2484600	2174100	1738500	1408800	1189400	795260	533470	466940	855070	919320	1066900	249270	221950	486830	861010	952890	914240	990550	964970	991520	1069300	969680	C00234	ko00670,ko00970,ko01100,ko01200
Lmhp008233	474.26	333.24	473.254	C23H40NO7P	[M+H]+	LysoPE 18:4	Lipids	LPE	-	3	40133	32382	30974	19178	25761	18379	51903	20915	36462	9514.9	17293	13517	17414	19511	17791	2654.8	3431.1	4775.1	16003	15418	17316	14949	17326	12285	15865	18915	--	--
Lmhp008589	476.28	335.26	475.27	C23H42NO7P	[M+H]+	LysoPE 18:3(2n isomer)	Lipids	LPE	-	1	21873000	20590000	22518000	16530000	20097000	15546000	20947000	17932000	22746000	14081000	15745000	15010000	16438000	16476000	14383000	4968900	5537600	5464000	12819000	13663000	14283000	12761000	14405000	14521000	14122000	14087000	--	--
Lmhp008801	476.28	335.26	475.27	C23H42NO7P	[M+H]+	LysoPE 18:3	Lipids	LPE	-	1	23586000	21707000	21921000	16889000	20961000	15026000	22541000	17162000	22690000	13239000	15776000	14598000	16032000	15389000	14603000	4672000	5572000	5517200	13308000	13369000	14063000	13443000	15090000	14322000	14143000	14753000	--	--
pmp000583	477.1	301.07	476.095	C22H20O12	[M+H]+	Diosmetin-7-O-glucuronide	Flavonoids	Dihydroflavone	35110-20-4	2	2676900	2535000	2942300	2963200	2703100	3255200	2561000	3126100	2024400	661700	786600	753660	673830	814050	681800	135390	300360	329730	2023500	1882600	1939300	1969500	2218400	2307400	2261900	2189700	--	--
pme1683	477.2	258	476.168	C18H32CaN2O10	[M+H]+	Calcium Pantothenate	Others	Vitamin	137-08-6	3	94909	113680	98093	111700	124140	137840	192610	147310	89891	67618	70964	54901	76491	55091	72764	78438	96911	79278	84266	93851	95863	109600	100410	94734	94634	116230	C12276	--
pmb0874	478.29	337.27	477.286	C23H44NO7P	[M+H]+	LysoPE 18:2(2n isomer)	Lipids	LPE	-	1	892520	870420	941150	590820	754360	585570	912800	670800	887090	412110	467440	488510	587360	570610	583430	190810	191510	221670	641570	611920	614870	568400	639730	610700	631610	639370	--	--
pmb0881	478.29	337.27	477.286	C23H44NO7P	[M+H]+	LysoPE 18:2	Lipids	LPE	-	1	889950	862970	921820	573440	807030	592780	886550	673990	854910	419760	444320	500110	601930	575810	634790	206100	207190	224230	639830	650460	673980	631470	656290	633400	666640	691670	--	--
Hmjp003123	479.08	303.06	478.075	C21H18O13	[M+H]+	Quercetin-5-O-glucuronide	Flavonoids	Flavonols	-	2	1548100	815620	393110	977890	1041400	1180300	346730	1268200	13853000	9696700	6885400	12220000	3519500	9297600	7371900	20409000	14864000	16975000	7297300	7536700	7439400	7947600	8284100	7801800	8365400	7784600	--	--
Lmmp003783	479.09	303.05	478.075	C21H18O13	[M+H]+	Quercetin-3-O-glucuronide	Flavonoids	Flavonols	22688-79-5	2	2681100	485700	197620	516850	486100	504710	180660	628650	2964900	9	9	9	9	9	9	9	9	9	3744300	4355400	3753800	3875900	3595200	3537000	3641400	4254500	--	--
Zmhn004909	477.06	169.01	478.075	C21H18O13	[M-H]-	3,4-Digalloylshikimic acid	Phenolic acids	Phenolic acids	-	3	18683	1754.2	5872.5	8893.2	10040	12197	4678.8	14562	91840	82253	54944	90576	17099	75698	54453	162990	126530	149700	62152	50746	63078	47342	56759	69224	53848	40246	--	--
Lmfn003760	477.07	301.04	478.075	C21H18O13	[M-H]-	Quercetin-4'-O-glucuronide	Flavonoids	Flavonols	201463-36-7	1	366340	243620	138970	338620	365400	319880	125900	310810	3567200	2206600	1954900	2872200	830550	2481400	1802100	6552900	3626500	4323000	2034900	2016400	1882600	2261000	2111600	1819400	1791000	2239900	--	--
Lmqp003647	479.08	303.05	478.075	C21H18O13	[M+H]+	Herbacetin-3-O-glucuronide	Flavonoids	Flavonols	-	1	3536500	135250	99802	297020	185820	244170	115430	280450	2662100	7893500	8000900	8366500	8975000	9378700	7880900	14040000	9134000	14603000	7511400	6314500	6830600	6794700	5831600	5019600	5681400	5561800	--	--
Lmsn003409	477.1	169.01	478.111	C22H22O12	[M-H]-	1-O-Galloyl-6-O-p-Coumaroyl-β-D-glucose	Phenolic acids	Phenolic acids	-	3	14105	11359	10058	18879	32731	7989.2	10924	38937	10749	5065.7	1355.7	893.76	1827.9	6836.8	29531	1378.3	1359.1	926.59	7522.6	4558.2	5748.6	7257.5	6600.8	9982.9	5056.8	9555.7	--	--
Hmcp002207	479.12	317.06	478.111	C22H22O12	[M+H]+	Isorhamnetin-7-O-glucoside (Brassicin)*	Flavonoids	Flavonols	6743-96-0	1	180330	94422	98372	68624	64561	74064	81347	86997	601030	2152300	1878300	4141400	525430	2386000	1651200	5184100	3082300	3679300	1409900	1775300	1757500	1407600	1786500	1773900	1799700	1722200	--	--
Lmsn004162	477.1	169.01	478.111	C22H22O12	[M-H]-	1-O-Galloyl-2-O-p-Coumaroyl-β-D-glucose	Phenolic acids	Phenolic acids	94356-18-0	3	16342	8240.2	4059.8	14770	14678	11670	5239.8	5212.2	93943	82685	52229	98974	31997	69623	50500	184740	113120	122570	70945	58966	70029	64753	52647	73234	61498	49904	--	--
Lmjp002906	479.12	317.07	478.111	C22H22O12	[M+H]+	Rhamnetin-3-O-Glucoside	Flavonoids	Flavonols	27875-34-9	1	179020	67904	63438	95537	72959	97018	55809	78584	581490	2132400	1649200	4009000	554830	2209000	1679100	5064900	3056100	3847700	1515900	1657900	1811800	1580500	1626500	1662800	1767800	1625400	--	--
Lmjp003044	479.12	317.06	478.111	C22H22O12	[M+H]+	Isorhamnetin-3-O-Glucoside*	Flavonoids	Flavonols	5041-82-7	1	181880	87033	66705	104600	63446	59461	29135	107030	588800	2136700	1885100	4026400	601750	2188400	1680700	4892000	3163300	3836800	1572100	1549000	1723800	1599700	1672700	1897000	1757400	1747000	--	--
Lmjp003295	479.12	317.07	478.111	C22H22O12	[M+H]+	6-Methoxykaempferol-3-O-glucoside	Flavonoids	Flavonols	63422-27-5	3	101280	78955	58948	105150	38142	90255	67297	89727	534180	2245200	1840600	3748400	555940	2118400	1647800	4381800	2959600	3388200	1464700	1531200	1718100	1422700	1627400	1737800	1839800	1641200	--	--
Hmgp002036	479.12	317.06	478.112	C22H22O12	[M+H]+	Nepetin-7-O-glucoside	Flavonoids	Flavonoid	569-90-4	1	121610	71604	44971	69600	57453	72359	67377	90597	556360	2329300	1788200	3703000	571090	2100100	1579600	5614200	2865300	3846700	1752000	1525400	1718200	1601000	1874200	1742700	1889100	1693700	--	--
mws1454	477.14	315	478.148	C23H26O11	[M-H]-	Persicoside	Flavonoids	Dihydroflavone	28978-03-2	2	1219.5	1307.8	551.41	1699.2	1748.9	3486.4	1314.5	2755.3	1104.4	18860	12810	34613	4781.3	19248	11959	33026	9332.8	13127	24428	15026	17883	11938	15541	25085	18032	14324	--	--
mws0289	480.31	339.29	479.301	C23H46NO7P	[M+H]+	LysoPE 18:1	Lipids	LPE	89576-29-4	1	15708000	12308000	14406000	8783500	12230000	7209100	14502000	9242500	13725000	6383600	6708800	5264100	10195000	7320400	8871400	2261700	1865900	2814600	9560000	9926400	10247000	9946000	10759000	10763000	10889000	10206000	--	--
pmb0856	480.31	339.29	479.301	C23H46NO7P	[M+H]+	LysoPE 18:1(2n isomer)	Lipids	LPE	-	1	10685000	7955400	9684900	5588500	8123200	4785000	10253000	5937900	8463700	4088500	4382300	3468400	6947500	4947900	5603800	1480500	1226400	1732500	6705100	6281100	6528200	6629500	7083000	7122700	6800500	7086500	--	--
pmb2260	480.31	184.07	479.301	C23H46NO7P	[M+H]+	LysoPC 15:1	Lipids	LPC	-	2	128220	131970	127070	114220	101110	93017	170000	138120	168170	122400	97896	122620	172990	116500	135240	118950	152350	113440	277060	254110	258970	272800	289040	268050	269670	279020	--	--
pmb0883	482.32	341.31	481.317	C23H48NO7P	[M+H]+	LysoPE 18:0	Lipids	LPE	69747-55-3	1	391810	343730	328820	152430	296150	176330	438880	268770	386950	143590	183560	171860	220840	208370	200320	58116	59995	71283	447020	418860	444350	421430	432740	446970	464660	453600	--	--
pmb2319	482.32	184.07	481.317	C23H48NO7P	[M+H]+	LysoPC 15:0	Lipids	LPC	108273-89-8	1	555860	493310	598620	551240	509640	436180	791030	702980	663940	411310	390050	343550	500810	280200	349460	331360	289740	260050	1166300	1077300	1219100	1179100	1273600	1114100	1152000	1175400	--	--
Lmhp009129	482.32	184.07	481.317	C23H48NO7P	[M+H]+	LysoPC 15:0(2n isomer)	Lipids	LPC	-	1	277980	251180	306930	205620	271440	198620	436310	294940	380100	160200	156030	114390	190930	143470	172300	68766	73414	58278	385320	425030	435560	453180	474150	468000	457180	479170	--	--
pmb0880	482.32	341.31	481.317	C23H48NO7P	[M+H]+	LysoPE 18:0(2n isomer)	Lipids	LPE	-	1	216490	156400	180530	109320	160170	86095	180920	107670	168940	80604	83511	68539	134780	92625	101560	29868	20291	35914	129420	121530	129910	120510	122860	142270	139560	122920	--	--
pmb3072	481.14	319.3	482.142	C22H26O12	[M-H]-	3-O-p-Coumaroylshikimic acid-O-glucoside	Phenolic acids	Phenolic acids	-	2	131750	99613	123510	114440	150450	131910	163260	149070	183090	138720	184360	161830	122330	136290	104150	184900	206630	192810	112310	90513	115730	102880	88882	113290	116800	123660	--	--
pmp000444	487.34	469.33	486.335	C30H46O5	[M+H]+	27,28-Dicarboxyl ursolic acid	Terpenoids	Triterpene	-	3	16934	17707	19199	20477	14875	17883	14143	17394	22418	8474.9	13333	10431	12576	13562	10671	10937	6304	105.17	10594	10904	16669	10529	10464	11758	12330	13181	--	--
Li512114	485.36	453.34	486.371	C31H50O4	[M-H]-	Corosolic Acid Methyl Ester	Terpenoids	Triterpene	4518-70-1	3	177.5	505.74	179.34	378.72	88.432	88.448	180.59	237.49	293.87	179.38	145.44	201.7	203.06	89.04	206.51	265.6	233.84	84.784	2640.4	3391.6	3188.9	4027.4	3630.6	3934.1	3928.5	3982.5	--	--
pmn001342	487.09	283	488.095	C23H20O12	[M-H]-	Rhein-8-O-(6'-O-acetyl)glucoside	Quinones	Anthraquinone	-	2	1987	2510.2	17341	6256.8	3434	17685	10082	12696	8443.2	7203.2	2379.2	15715	6336.2	1934.8	23327	24464	60484	11547	358710	361210	367070	361070	393290	388880	340290	386970	--	--
Zmdn004335	487.09	283.06	488.095	C23H20O12	[M-H]-	Rhein 1-O-(O-acetyl)-glucoside	Quinones	Anthraquinone	-	2	4002.5	15128	5434.2	7399.5	21506	16875	3066.2	12115	5831.8	7400.8	7110.8	20790	35924	6038.5	33509	9854.2	52156	3316.2	21132	18328	15806	17684	21913	14512	26994	12966	--	--
MWSmce613	489.12	264.04	488.107	C14H26N4O11P2	[M+H]+	Citicoline	Nucleotides and derivatives	Nucleotides and derivatives	987-78-0	3	5718.5	6675.7	4290	7624.2	5238.4	4765	8101	5716.2	9530	3334.9	6192.7	7150.6	9526.9	5718.5	5718.5	9056.1	2859.2	14772	4765	4288.3	2858	1667.3	5715.1	5718.5	6195.2	8106.2	C00307	ko00564,ko01100
Hmhn007817	487.34	469.33	488.35	C30H48O5	[M-H]-	2α,3α-Dihydroxyursolic acid	Terpenoids	Triterpene	-	3	623.19	1437.8	202.78	699.78	204.91	1179.1	461.7	158.51	188.43	835.53	126.95	255.56	233.12	1647.5	254.13	226.68	712.05	406.66	1537.6	4118.4	2136.8	3661.6	2131.4	862.28	3197.9	2675.3	--	--
Smpn009230	487.34	487.34	488.35	C30H48O5	[M-H]-	2α,3α,23-trihydroxyolean-12-en-28-oic acid	Terpenoids	Triterpene	-	3	14226	14101	11421	16033	7842.1	4871.2	11359	16488	11285	4852	9917.5	5414.4	6374.1	9198.8	8875.4	10663	9161.7	5545.1	27281	26906	25048	33341	36532	37304	23816	28358	--	--
Lmsp005625	491.08	317.03	490.075	C22H18O13	[M+H]+	3-O-Methylellagic acid-4'-O-(5''-O-acetyl)arabinoside	Tannins	Tannin	-	3	3309.5	1852.3	1009.4	3402.5	4650.3	3539.8	1005.9	3418.4	2880.9	2691.2	4975	4008.2	3435.5	1708.4	866.22	2130.1	541.07	1626.4	10717	7475.3	5942.9	7231.8	9209.7	7415	4872.9	4981.3	--	--
Lmmn003398	489.11	285.04	490.111	C23H22O12	[M-H]-	Kaempferol-3-O-(6''-acetyl)glucoside	Flavonoids	Flavonols	-	3	39262	56356	61133	41050	42506	39325	35016	31394	24638	15333	13867	15778	12323	18336	11380	37269	29550	27174	28262	35050	31503	47103	30023	28410	25426	45498	--	--
pma1303	492.31	184.07	491.301	C24H46NO7P	[M+H]+	LysoPC 16:2	Lipids	LPC	-	1	700490	691950	801510	471850	672340	457910	974160	556320	789590	399830	390650	363600	504210	433890	407250	143870	162310	171800	412600	423430	422270	427810	479330	444060	438190	444600	--	--
pmb0863	492.31	184.07	491.301	C24H46NO7P	[M+H]+	LysoPC 16:2(2n isomer)	Lipids	LPC	-	1	697560	692250	834280	453440	705630	461490	923490	573200	772510	384250	396590	383680	489960	469530	427350	160330	153710	167240	406450	441200	446960	442880	473010	448280	469800	461910	--	--
Lmhp008833	494.32	184.07	493.317	C24H48NO7P	[M+H]+	LysoPC 16:1(2n isomer)	Lipids	LPC	-	1	5463200	4672500	5311900	3296900	3576700	2728900	6458300	4321500	5097700	2624100	2720000	2622700	3157600	2867500	3131500	1617300	1665800	1529700	3188000	3399500	3783900	3420100	4005500	4100900	4009900	3621100	--	--
pmp001270	494.32	184.07	493.317	C24H48NO7P	[M+H]+	LysoPC 16:1	Lipids	LPC	76790-27-7	1	5121800	4721800	5281600	3099800	4318100	2874900	5897800	3763800	4887600	2430100	2620200	2381200	3091100	2934900	3082900	1586400	1616500	1535500	3195500	3281000	3261400	3271600	3486200	3407100	3450500	3582800	--	--
HJN054	493.21	361.16	494.215	C25H34O10	[M-H]-	Secoisolariciresinol-9'-O-xyloside	Lignans and Coumarins	Lignans	-	3	708920	747980	777520	1019300	935790	918460	955100	921410	557350	63737	118630	113450	62167	103740	70806	285970	191270	270940	434310	415240	555580	510670	537700	518670	514820	558290	--	--
pmb0855	496.34	184.07	495.332	C24H50NO7P	[M+H]+	LysoPC 16:0	Lipids	LPC	17364-16-8	1	20680000	18663000	20872000	15379000	18474000	14436000	24622000	19817000	20614000	10686000	10248000	9119400	12498000	9357900	10807000	8161000	6272400	6680100	18211000	18631000	18469000	18708000	19105000	18501000	18172000	19180000	--	--
pmd0132	496.34	184.07	495.332	C24H50NO7P	[M+H]+	LysoPC 16:0(2n isomer)	Lipids	LPC	-	1	22064000	19258000	22139000	16763000	19361000	15356000	26282000	20230000	21770000	11408000	11061000	9675300	13753000	10436000	11261000	8743500	6957600	7292600	18239000	18919000	19219000	19590000	19170000	20022000	19814000	19522000	--	--
Lmhp009349	502.29	361.27	501.286	C25H44NO7P	[M+H]+	LysoPE 20:4(2n isomer)	Lipids	LPE	-	3	2897.3	3062.6	2196.5	1503.4	2822.1	407.31	1436.3	1711.7	1829.7	1458.8	1622.4	1050.7	2042.7	1950.9	2185.5	1326.9	568.25	1131	3431.7	2767.2	2555	2665.4	4717.2	4407.4	1710.9	4048.3	--	--
Lmhp009497	502.29	361.27	501.286	C25H44NO7P	[M+H]+	LysoPE 20:4	Lipids	LPE	-	3	76.458	1762.1	2337.4	2257.8	2666.5	2401.7	2250.1	2246	1857.3	1342.6	1351	1719.4	1956.6	1651.3	2470.9	969.48	558.27	2161.9	3982.9	2850.6	3260.1	3168.4	4350.5	3757.8	3695.5	3394.2	--	--
Lmhp009802	504.31	363.29	503.301	C25H46NO7P	[M+H]+	LysoPE 20:3(2n isomer)	Lipids	LPE	-	2	87560	73014	86617	45009	66747	47887	88797	50375	82845	38878	38104	43329	55847	52174	37460	22362	17078	24059	53110	50499	49211	51909	52433	54659	55820	54099	--	--
Lmhp010040	504.31	363.29	503.301	C25H46NO7P	[M+H]+	LysoPE 20:3	Lipids	LPE	-	2	91185	77246	92263	49174	78596	49136	86542	50495	88597	42319	42391	45562	58886	53686	44312	25825	16548	23395	57991	55742	53820	54883	60865	55224	56006	58276	--	--
pmn001642	503.08	459.1	504.09	C23H20O13	[M-H]-	Kaempferol-3-O-(2''-O-acetyl)glucuronide	Flavonoids	Flavonols	-	2	76858	55940	55207	44651	37648	43516	55820	68388	63076	67324	67119	79081	57434	53850	50604	48073	63795	49604	79482	76281	52377	84806	67806	70721	66429	6162	--	--
HJAP135	505.12	257.08	504.126	C24H24O12	[M+H]+	Pinocembrin-7-O-(6''-O-malonyl)glucoside	Flavonoids	Dihydroflavone	-	1	2394800	3366600	2733000	3076700	2473600	2888200	3076100	3220000	3346300	3961800	3236900	4947300	2029400	3623200	2727400	5134200	4244600	4735500	3452300	3356000	3531500	3574000	3453200	3513800	3560800	3558000	--	--
pmb3000	503.12	341.1	504.127	C24H24O12	[M-H]-	Chrysoeriol-7-O-(6''-acetyl)glucoside	Flavonoids	Flavonoid	-	2	5423.2	10254	8748.8	7054	14624	10329	8424.8	10152	7322.5	38569	15338	24176	39256	12292	43657	25083	12655	9328.8	19930	13808	11748	13896	15766	12689	15025	24452	--	--
Lmsn002288	503.14	341.09	504.148	C21H28O14	[M-H]-	1-O-Caffeoyl-(6-O-glucosyl)-β-D-glucose	Phenolic acids	Phenolic acids	-	1	479120	307150	275720	286480	318030	307700	306930	267970	279910	359740	399200	613460	564730	508580	540700	414380	356230	409880	571230	623300	540760	636100	624740	668840	541680	657740	--	--
pme2125	503.16	179	504.169	C18H32O16	[M-H]-	Raffinose	Others	Saccharides and Alcohols	512-69-6	3	7845.5	11935	11436	6123.2	13095	12380	7537.5	3297	4200	11957	6687.8	4184	7813.5	11087	5391	2986.2	1377	3582.5	11209	7510	856.75	9688.8	5400	12136	11874	11950	C00492	ko00052,ko01100,ko02010
Smpn009074	503.34	503.34	504.345	C30H48O6	[M-H]-	2α,3α,19α,23-tetrahydroxy-12-ursen-28-oic acid	Terpenoids	Triterpene	-	2	2610.5	711.22	2133.8	5057.1	1004.2	1609.2	2118.8	1341.3	3546	2031.5	2435.3	1673.2	269.88	1989.4	1688.2	1514.6	1179.1	1117.2	30137	26644	38180	37529	28163	34829	34090	29743	--	--
Lmhp010757	506.32	365.31	505.317	C25H48NO7P	[M+H]+	LysoPE 20:2	Lipids	LPE	-	1	323310	296670	324390	149450	281580	167720	403330	191140	327250	96119	106540	117400	175400	151650	136950	63491	59872	62978	238900	273370	261030	252810	269310	258910	255410	265810	--	--
Lmhp010514	506.32	365.31	505.317	C25H48NO7P	[M+H]+	LysoPE 20:2(2n isomer)	Lipids	LPE	-	1	328070	277510	321720	141500	269060	159320	377060	203080	319000	86421	110240	107960	162710	151700	143260	55113	56711	70452	246160	246600	256390	236460	257090	267050	244590	241550	--	--
Lmhp008718	506.32	184.07	505.317	C25H48NO7P	[M+H]+	LysoPC 17:2	Lipids	LPC	-	1	430920	409340	462410	223300	304840	221580	473520	337240	446040	182380	183690	202320	229190	180410	220930	106280	131900	115990	258890	268400	278350	269360	324660	311010	288200	298310	--	--
pmb3045	505.1	329.1	506.106	C23H22O13	[M-H]-	Tricin-7-O-Glucuronide	Flavonoids	Flavonoid	-	2	18908	33126	28958	28926	42455	33997	27616	65141	48940	46184	33660	34630	14665	27684	27940	89858	80467	37672	33780	26641	32766	58970	40710	35308	35323	35123	--	--
Hmln002199	505.1	300.03	506.107	C23H22O13	[M-H]-	Quercetin-3-O-(6''-acetyl)galactoside	Flavonoids	Flavonols	-	3	5457	1209.5	9648	3683.5	615	605	9	3025.2	7357.8	19830	15777	5709.8	16273	31885	18210	56046	43692	29146	33393	78402	38801	94306	39521	74899	56944	84062	--	--
Lmhp009590	508.34	184.07	507.332	C25H50NO7P	[M+H]+	LysoPC 17:1	Lipids	LPC	-	1	886480	701840	858340	406240	621360	372830	846440	624960	758080	362020	335490	256070	473980	393520	385840	221750	234630	207730	512420	548340	535200	518500	592870	582590	582380	606590	--	--
Hmcn000773	507.17	179.05	508.179	C21H32O14	[M-H]-	6'-O-Glucosylaucubin	Others	Others	-	2	80308	178900	152630	148790	125840	163450	88387	106640	256950	183180	250320	200620	143150	197860	185330	577730	522150	389110	125690	130270	148220	152430	156270	132270	140240	144180	--	--
Lmhp010515	510.36	184.07	509.348	C25H52NO7P	[M+H]+	LysoPC 17:0(2n isomer)	Lipids	LPC	-	1	301690	306630	340710	210260	264490	224020	378830	340950	359380	204100	191850	188280	198200	159280	172120	162570	142520	145290	359580	382100	383840	384120	415960	402080	416720	416820	--	--
pmb2406	510.36	184.07	509.348	C25H52NO7P	[M+H]+	LysoPC 17:0	Lipids	LPC	50930-23-9	1	792870	707880	811350	465900	597600	473670	989130	839450	822210	483120	410760	359270	492960	301050	348020	371630	319510	292730	971000	1006600	1016000	965810	1025000	1059900	1048800	1095400	--	--
Lmhp009773	515.32	261.22	514.314	C27H46O9	[M+H]+	1-α-Linolenoyl-glycerol-3-O-glucoside	Lipids	Glycerol ester	-	1	746740	632390	626050	800430	776740	660380	795510	776910	758130	479900	789000	598670	729320	428670	458650	407960	519730	507710	509740	495510	558340	648290	665430	523630	505430	549000	--	--
Lmhp009526	515.32	261.22	514.314	C27H46O9	[M+H]+	2-α-Linolenoyl-glycerol-1-O-glucoside	Lipids	Glycerol ester	-	1	828400	558310	595580	875730	992520	544450	805930	909360	672070	486710	722130	597620	700430	708430	644350	427980	541100	559590	531130	593060	693680	608620	509020	554790	537910	777790	--	--
Hmqp006235	516.3	184.07	515.297	C26H46NO7P	[M+H]+	LysoPC 18:4	Lipids	LPC	-	1	314130	305640	379070	143470	245190	165830	598850	155180	323810	70581	81126	98602	165900	122530	141710	24690	32981	56102	136060	123210	140970	149910	162390	138600	113890	154840	--	--
pmn001382	515.12	353.09	516.127	C25H24O12	[M-H]-	Isochlorogenic acid A	Phenolic acids	Phenolic acids	2450-53-5	2	9633.5	2687.2	40693	86414	88253	140150	161560	118540	170180	1046700	1026600	801180	730780	757310	1023200	2089	2114.8	1749.8	150940	137110	139840	136450	162830	157600	140740	139250	--	--
MWSmce346	517.13	163.04	516.127	C25H24O12	[M+H]+	1,3-Dicaffeoylquinic acid	Phenolic acids	Phenolic acids	19870-46-3	3	3898.5	6746.2	4484	27964	30526	48448	52314	65152	57668	673810	632520	500580	444810	460530	666870	3911.2	4121.5	4420.2	68642	63323	70930	55897	76074	69176	45746	69203	C10445	--
Li512115	515.12	353.09	516.127	C25H24O12	[M-H]-	Isochlorogenic acid B*	Phenolic acids	Phenolic acids	14534-61-3	2	23823	23379	61473	91152	163610	182990	236200	170040	198810	991840	1253000	982900	704760	654870	981090	1814.5	11477	2287.5	149860	190310	173530	159470	222470	178170	157580	164810	C10468	--
pmn001384	515.12	353.09	516.127	C25H24O12	[M-H]-	Isochlorogenic acid C*	Phenolic acids	Phenolic acids	57378-72-0	2	15808	15408	56867	72898	156020	189380	274640	187940	207740	1051300	1200900	969390	672480	737040	1093300	1800.8	8057.2	1449.8	207140	235790	175510	135500	187260	182920	215630	171710	--	--
Lmhp010573	517.34	263.24	516.33	C27H48O9	[M+H]+	1-Linoleoylglycerol-3-O-glucoside	Lipids	Glycerol ester	-	1	39322	28547	32715	39820	38318	28590	59215	38809	51624	25448	43781	17584	38477	20138	22948	35889	40208	34630	35994	32785	36943	44022	32511	34536	28295	42472	--	--
Lmhp010334	517.34	263.24	516.33	C27H48O9	[M+H]+	2-Linoleoylglycerol-1-O-glucoside	Lipids	Glycerol ester	-	1	23930	26475	17386	44777	31464	21120	42939	35359	38257	22284	39259	23311	28201	24616	10837	19927	31545	36142	23061	25875	23811	26788	34507	28220	27521	29011	--	--
pmb0865	518.32	184.07	517.317	C26H48NO7P	[M+H]+	LysoPC 18:3(2n isomer)	Lipids	LPC	-	1	465000	479570	523140	374630	488640	347020	498620	406950	536390	308980	324360	276860	300190	283520	304720	141170	154630	139520	259330	290110	288580	266940	289290	297310	275590	297240	--	--
pmb0854	518.32	184.07	517.317	C26H48NO7P	[M+H]+	LysoPC 18:3	Lipids	LPC	-	1	18387000	17684000	19076000	12927000	16296000	11783000	17417000	14789000	17270000	11575000	11357000	11022000	11227000	11576000	11812000	4827900	5262700	4819400	9215600	9850300	9520800	10474000	11203000	10511000	9935700	11334000	--	--
Zmdn005578	517.1	269.05	518.106	C24H22O13	[M-H]-	Emodin 8-O-(6'-O-malonyl)-beta-D-glucoside	Quinones	Anthraquinone	-	2	12282	12707	13830	7485.1	8575.2	13987	10492	18373	20774	6892.2	6599.1	16401	8271.2	8457.5	4019	4781.8	9139.6	8894.5	45036	43120	38968	45542	33371	43264	37619	55353	--	--
Hmbn002692	517.16	175.04	518.164	C22H30O14	[M-H]-	6'-O-Feruloyl-D-sucrose	Phenolic acids	Phenolic acids	118230-77-6	2	27692	24708	29543	38201	29584	43852	45022	12460	28127	52008	38608	27170	49551	39901	60583	52142	57876	77478	130130	122230	157200	112880	137350	124870	119020	132400	--	--
pmp001273	520.34	184.07	519.332	C26H50NO7P	[M+H]+	LysoPC 18:2	Lipids	LPC	-	1	9759900	10625000	9835400	7416500	9386900	7438600	10026000	8597300	11230000	5569900	6134800	6061600	6851500	6971200	7483300	4113700	4391100	4005600	7299800	7338000	7814200	7657100	7875400	7800100	7646300	7516500	--	--
pmp001251	520.34	184.07	519.332	C26H50NO7P	[M+H]+	LysoPC 18:2(2n isomer)	Lipids	LPC	-	1	1018600	1049100	1060400	772280	933810	738560	1096500	840450	1095900	574430	568580	611810	695810	696310	750840	386590	430390	373890	737750	715160	745800	715980	750310	784390	728170	774260	--	--
pmn001644	519.08	300	520.085	C23H20O14	[M-H]-	Quercetin-3-O-(2''-acetyl)glucuronide	Flavonoids	Flavonols	-	2	8877	2381.5	1080	589.75	2392	1174	2335.5	4093.2	29306	26090	27484	49745	7699.2	26446	29049	44208	28411	33210	17439	10064	21914	19221	19110	15582	15955	27547	--	--
Li512111	519.11	315.05	520.122	C24H24O13	[M-H]-	Isorhamnetin-3-O-(6''-acetylglucoside)	Flavonoids	Flavonols	-	3	4814.4	5005.7	1804.6	3701.6	3709.7	3910.1	2104.5	5010.1	5960.1	47263	30321	43550	43076	40277	47347	43414	53470	40433	163690	174410	147360	181740	186870	190520	164680	167780	--	--
Cmsp003083	521.2	131.05	520.194	C26H32O11	[M+H]+	Dehydrodiconiferyl alcohol-4-O-glucoside	Others	Others	107870-88-2	1	997350	1530100	1568200	1403000	1185400	1338600	1205400	1218800	973580	1731900	1252700	1972100	533550	1433000	1135800	949890	570850	916600	791260	842870	888920	845720	1027700	903170	891860	972740	--	--
pmn001378	519.19	357.14	520.194	C26H32O11	[M-H]-	Pinoresinol-4-O-glucoside	Lignans and Coumarins	Lignans	41607-20-9	2	125880	88924	85057	55418	45036	23815	60970	67594	101240	293840	249240	188310	269820	187280	275290	118550	96672	101020	114810	95288	113860	156800	95708	113710	111040	94914	C17529	--
Lmsp003655	521.2	131.05	520.194	C26H32O11	[M+H]+	Dehydrodiconiferyl alcohol-gamma'-O-glucoside	Phenolic acids	Phenolic acids	-	1	656900	532010	642890	666020	453020	623730	494590	744860	576480	2780100	2732600	3218900	965010	1924400	1694100	2841100	2452400	2228000	916680	865740	914210	999160	967560	945820	884350	853460	--	--
pmp001281	522.36	184.07	521.348	C26H52NO7P	[M+H]+	LysoPC 18:1	Lipids	LPC	-	1	20200000	17498000	20453000	10958000	17545000	10786000	18571000	12696000	17007000	9256400	8448500	7257000	13746000	11313000	13656000	3518100	2924600	3377000	9697700	10572000	10810000	11135000	11087000	11606000	11790000	11637000	--	--
Lmhp010190	522.36	184.07	521.348	C26H52NO7P	[M+H]+	LysoPC 18:1(2n isomer)	Lipids	LPC	-	1	597330	512150	593530	329490	496990	309440	543310	346580	508810	249810	218530	204620	371730	294700	367240	107290	81485	96874	286420	300640	300190	296570	321730	312260	317110	319170	--	--
Lmjp003834	523.18	177.06	522.174	C25H30O12	[M+H]+	6-O-p-Methoxycinnamoylcatalpol	Terpenoids	Monoterpenoids	121710-02-9	2	286070	135690	136970	346300	274150	245830	106120	241630	221590	65849	53125	144800	105030	40167	64822	360860	714960	160540	217160	98894	221250	224050	240760	281080	276180	458150	--	--
pmd0136	524.37	184.07	523.364	C26H54NO7P	[M+H]+	LysoPC 18:0(2n isomer)	Lipids	LPC	-	1	1291700	1172700	1309600	435180	911940	780820	1399500	1028900	1175500	618770	732800	575530	774140	642880	908570	244790	226570	253730	1014900	1094600	1097500	1116600	1204400	1138500	1190200	1269200	--	--
mws0126	524.37	184.07	523.364	C26H54NO7P	[M+H]+	LysoPC 18:0	Lipids	LPC	19420-57-6	1	7620600	6759900	7433500	2935000	5810500	4545900	8937400	7314000	7597000	3977200	4793800	3845000	4310800	3427600	4098200	2367000	2393800	2368900	6368500	6599900	6712700	6976800	6983100	7322500	7250300	7360700	--	--
pmp001259	526.34	508.33	525.33	C28H47NO8	[M+H]+	5,8,11,14-Pentadecanoamide	Lipids	Free fatty acids	-	2	32826	25480	28550	20929	24086	28203	24434	31612	39052	79198	76560	105430	128560	51418	94902	103570	176740	104770	75314	66630	63902	48263	58039	67924	70412	71208	--	--
Lmhp008924	532.34	184.07	531.332	C27H50NO7P	[M+H]+	LysoPC 19:3	Lipids	LPC	-	2	9537.9	8431	11423	3120	6372.3	4674.6	10038	7771.9	12061	4538.4	6384	3027.9	6455.8	3326.6	4339.2	3643	5157.7	2323.7	4193.4	3332.7	3330.1	4239.6	5513.8	1266.2	4745.4	5687.4	--	--
Lmbn001181	531.14	531.13	532.143	C22H28O15	[M-H]-	Fraxetin-7,8-di-O-glucoside	Lignans and Coumarins	Coumarins	-	2	27179	37623	10023	61058	12474	44839	65783	45069	69785	22651	23464	45577	10344	66707	24068	243220	190780	169040	136930	187460	192730	178500	146170	185770	147690	164360	--	--
Lmhp007840	534.36	184.07	533.348	C27H52NO7P	[M+H]+	LysoPC 19:2	Lipids	LPC	-	2	177990	172920	201750	120610	160560	131570	170030	147190	197310	192770	147360	162070	154130	165470	160330	70564	66578	62669	112270	122850	117400	125590	125950	122420	127750	131800	--	--
Lmhp007598	534.36	184.07	533.348	C27H52NO7P	[M+H]+	LysoPC 19:2(2n isomer)	Lipids	LPC	-	2	162980	220070	201220	148730	159810	173820	214080	236650	206650	28782	23065	22087	43187	40918	50437	23425	33059	29022	168530	170260	183270	171290	179500	177580	171270	175030	--	--
Lmdp004892	535.11	287.05	534.101	C24H22O14	[M+H]+	Kaempferol-3-O-(6''-malonyl)glucoside	Flavonoids	Flavonols	-	1	415450	327130	456350	291370	288130	318000	461710	379190	363720	249080	206260	267890	171860	170610	298400	140990	116850	106220	329670	331680	352090	333830	357330	381860	357460	361840	--	--
pmp000587	535.11	449.1	534.101	C24H22O14	[M+H]+	Luteolin-7-O-(6''-malonyl)glucoside	Flavonoids	Flavonoid	-	1	13887	19744	22284	24063	20502	23033	12541	17226	12965	7982.5	7119.6	13036	9008.7	14291	8868.2	18549	17263	16847	18087	18073	15989	18191	21905	20218	11548	13435	C10103	--
Lmhp010908	536.37	184.07	535.364	C27H54NO7P	[M+H]+	LysoPC 19:1	Lipids	LPC	-	1	255440	221870	244790	112250	168560	113100	270130	195620	208360	106200	105340	85560	121960	105740	104340	71874	70380	69626	258480	220730	223220	208960	245650	255150	290380	251210	--	--
Zmfn000481	535.04	323.03	536.044	C14H22N2O16P2	[M-H]-	Uridine-5'-Diphosphate-D-Xylose	Nucleotides and derivatives	Nucleotides and derivatives	3616-06-6	3	258200	222950	265980	217530	217910	231160	331810	308530	303540	252100	194150	218430	222410	210110	180300	63105	62049	59503	195940	219100	217280	242730	215960	201560	240560	228980	C00190	ko00520,ko00908,ko01100
pmb0824	537.1	177.4	536.153	C25H28O13	[M+H]+	Syringic acid-4-O-(6''-feruloyl)glucoside	Phenolic acids	Phenolic acids	-	3	31814	28553	24466	37146	23627	28700	27967	33733	31405	57165	64208	80052	69735	70100	78650	60362	56800	73442	56580	50924	54281	74065	50815	55168	65320	50273	--	--
pmb2228	538.39	184.07	537.379	C27H56NO7P	[M+H]+	LysoPC 19:0	Lipids	LPC	108273-88-7	1	107420	92920	111390	67246	96132	54219	136220	109100	100290	32113	20670	20910	53953	41470	46779	10301	10970	10543	45079	55502	50833	50704	56483	53518	42638	55052	--	--
pmc0960	544.34	184.07	543.332	C28H50NO7P	[M+H]+	LysoPC 20:4	Lipids	LPC	-	3	6799.3	6677.1	5390.6	8983.7	9496.5	6361.6	9982.9	7826	9630	8452.7	9327.7	7593	7186.6	6597.3	7416.9	14289	7013.2	5383.9	19280	21643	19923	22011	24114	20652	23611	22261	--	--
pmp001282	544.34	485.27	543.333	C28H50NO7P	[M+H]+	Propyl 2-(trimethylammonio)ethyl phosphate	Others	Others	-	1	8813600	7405800	8660800	5150300	7379900	4503800	7883900	4554500	7708600	4216500	4163100	3737600	5857200	4974000	6357500	2091800	1713800	1915800	5025300	5224800	5165200	5352100	5570600	5332500	4979400	5318300	--	--
Lmhp009890	546.36	184.07	545.348	C28H52NO7P	[M+H]+	LysoPC 20:3	Lipids	LPC	1199257-41-4	1	483690	464660	470210	273150	385250	306510	447480	337850	459270	272520	268590	290990	326510	290500	281710	195130	194110	206780	229000	257230	261750	282080	267970	268560	268370	293450	--	--
pmd0147	548.37	184.07	547.364	C28H54NO7P	[M+H]+	LysoPC 20:2	Lipids	LPC	-	3	1803100	1858100	2063700	939720	1390500	1091200	2012600	1508200	1817000	815280	753020	900300	1119600	1035000	1065700	626720	584830	603590	1315700	1348300	1393100	1425600	1464700	1483200	1461000	1496100	--	--
pmd0146	548.37	184.07	547.364	C28H54NO7P	[M+H]+	LysoPC 20:2(2n isomer)	Lipids	LPC	-	3	1844700	1754100	2110800	980960	1426500	1086900	1904700	1474300	1712800	794860	792170	866980	1093800	1010500	1024400	628710	586680	559680	1273100	1309400	1310500	1333200	1463000	1468000	1515500	1465700	--	--
pmb0608	549.12	301.4	548.117	C25H24O14	[M+H]+	Chrysoeriol-7-O-(6''-malonyl)glucoside	Flavonoids	Flavonoid	-	1	35802	51078	49379	77552	39042	75216	43471	54027	39387	18469	17007	33804	20745	39673	21573	61599	53026	39922	69571	79922	82172	74701	79498	94215	107280	88555	--	--
pmp000588	549.12	463.12	548.117	C25H24O14	[M+H]+	Diosmetin-7-O-(6''-malonyl)glucoside	Flavonoids	Dihydroflavone	-	1	2903.8	1118.5	1773.4	1936.5	2942.7	2941.5	2371	3255.6	3943.7	2941.5	1760.2	4061.9	2768.8	2942.6	3825.6	5471.9	3578.4	4239.8	3092.9	6114.3	6351.2	4437.6	7174.6	3499.2	2856.9	1285.1	--	--
Lmhp011549	550.39	184.07	549.379	C28H56NO7P	[M+H]+	LysoPC 20:1	Lipids	LPC	-	1	1300200	1104200	1288500	557090	1063300	687330	1348100	904690	1003700	470880	373800	432180	767080	557800	710100	291490	261980	276980	859490	896480	868270	908470	940710	1011700	1021300	935880	--	--
Hmln002189	549.09	505.11	550.096	C24H22O15	[M-H]-	Quercetin-3-O-(6''-malonyl)galactoside	Flavonoids	Flavonols	-	1	15664	2121	11833	11015	4889.2	6060.2	5835	11064	25584	65991	37734	56836	49378	44314	49732	131330	133310	99448	142520	133780	150040	131290	153150	124330	129970	120860	--	--
pmp000589	551.1	303.05	550.096	C24H22O15	[M+H]+	Quercetin-7-O-(6''-malonyl)glucoside	Flavonoids	Flavonols	-	1	33498	5076.8	19542	5075.2	3676.8	11294	3354.5	20694	39181	123340	60100	87139	60330	84848	94138	216090	207020	145270	221190	202820	242090	214130	224660	257680	242140	209260	--	--
pmb2979	549.12	387.1	550.132	C25H26O14	[M-H]-	Hesperetin-7-O-(6''-malonyl)glucoside	Flavonoids	Dihydroflavone	-	2	63563	51187	81597	58330	64818	81286	56113	45466	39400	29057	28494	32576	29924	26743	27985	25310	35145	29704	48479	36428	52216	55007	24827	37448	48972	65222	--	--
mws1138	551.15	303.04	550.143	C24H26N2O13	[M+H]+	Betanin (Betanidin-5-O-glucoside)	Alkaloids	Plumerane	7659-95-2	3	12696	575.25	7977	3093.5	4166.2	3743.5	2953.8	5253.8	2725.5	71165	42648	44654	68614	33426	29638	60341	13792	53282	41858	56398	70722	87077	36415	44456	66504	55326	C08540	ko00965,ko01110
pmd0142	552.4	184.07	551.395	C28H58NO7P	[M+H]+	LysoPC 20:0(2n isomer)	Lipids	LPC	-	3	33015	31698	36972	15772	26261	26023	41803	30221	31776	13806	15281	11099	24729	15256	15623	8316.6	9826.7	7340.9	23910	24182	26778	23193	25494	27276	27498	25123	--	--
pmd0143	552.4	184.07	551.395	C28H58NO7P	[M+H]+	LysoPC 20:0	Lipids	LPC	108341-80-6	3	82541	93928	93597	54419	78256	52241	93152	61321	85829	27789	35080	25502	43780	42186	48706	22406	20207	19662	64547	59701	65153	64252	60628	70457	66066	66009	--	--
Lmmn002260	551.21	389.17	552.221	C27H36O12	[M-H]-	5'-Methoxyisolariciresinol-9'-O-glucoside	Lignans and Coumarins	Lignans	-	2	98124	103750	73515	55365	87052	73471	85123	114780	119390	293790	289550	213660	318900	197780	462050	48134	53397	47662	178930	197690	133770	156070	188360	155790	162550	151500	--	--
Rfmb25702	561.2	357.13	562.205	C28H34O12	[M-H]-	Pinoresinol-4-O-(6''-acetyl)glucoside	Lignans and Coumarins	Lignans	-	3	126750	121390	124650	63623	74047	100580	94880	132310	123900	557870	476150	412580	290390	375430	414930	249720	312240	267440	191330	184040	225610	250890	267590	251820	194320	223010	--	--
HJAP064	565.12	317.08	564.088	C25H24O15	[M+H]+	Isorhamnetin-3-O-(6''-malonylglucoside)	Flavonoids	Flavonols	-	1	1899	8407.8	4581.1	581.64	1928.5	2316.8	4420.8	2116.4	18840	47523	56543	67030	67021	70737	54412	63680	84748	76306	254120	272730	241210	215150	228390	294910	247620	259240	--	--
pmb2922	565.05	323.1	566.055	C15H24N2O17P2	[M-H]-	Uridine 5'-diphospho-D-glucose	Nucleotides and derivatives	Nucleotides and derivatives	133-89-1	1	1251600	1068000	1088800	1090900	1600400	1077300	1644600	1666100	1438000	1261200	926110	1087100	1691500	1141000	882490	267370	259850	201340	847240	773940	979090	907860	888310	802530	922110	1008200	C00029	ko00040,ko00052,ko00053,ko00240,ko00500,ko00520,ko00561,ko00908,ko01100,ko01110
Lmmp003306	567.13	303.05	566.127	C25H26O15	[M+H]+	Quercetin-3-O-xylosyl(1→2)arabinoside	Flavonoids	Flavonols	-	1	152900	23154	4807	12810	13338	15400	9	20171	336970	708100	723040	1002500	541670	717590	624710	1955100	1241100	1631000	528820	369320	377710	487660	581440	425820	539570	565820	--	--
Lmhp009682	570.36	184.07	569.348	C30H52NO7P	[M+H]+	LysoPC 22:5(2n isomer)	Lipids	LPC	-	3	259.6	144.21	392.93	575.92	214.49	493.95	860.07	847.46	1503.5	143.77	450.59	210.92	357.34	651.12	286.01	1061.5	296.44	222.44	3565.3	5259.3	5976.8	5123.1	4468.2	4940.4	2687.2	6174.4	--	--
Lmhp010099	570.36	184.07	569.348	C30H52NO7P	[M+H]+	LysoPC 22:5	Lipids	LPC	-	3	596.44	176.34	147.28	444.05	309.43	415.52	2147.1	539.33	532.4	839.65	213.14	464.33	999.41	434.28	358.43	759.35	253.68	178.37	3608.8	4047	2566.3	4079	5197.6	3281.2	4242.4	3353.9	--	--
pme0430	575.12	285	576.127	C30H24O12	[M-H]-	Procyanidin A1	Tannins	Proanthocyanidins	103883-03-0	3	1189	597	596	4762.8	1233	1793.5	594.25	1164.5	589	2968.8	2960	2359.2	612.75	4072	603.75	1763	9345.8	1192.5	6607.8	8784.8	8181.5	8831	7701.2	10111	8743.5	8954	--	--
pme0432	575.12	285.01	576.127	C30H24O12	[M-H]-	Procyanidin A2	Tannins	Proanthocyanidins	41743-41-3	3	20772	30574	11718	43791	25411	36541	35533	75278	69862	109360	98128	175300	58456	124090	108000	186680	202630	221840	112120	124030	109820	98326	125640	94932	123310	87018	C10237	--
Lmpp003930	579.15	271.06	578.142	C30H26O12	[M+H]+	Apigenin-7-O-(6''-p-Coumaryl)glucoside	Flavonoids	Flavonoid	-	3	21191	21409	24844	24536	40471	16973	25904	20202	22406	1988.2	10108	6126.2	9514.2	9012	1650	10746	7356	11830	28516	25161	26702	19176	32021	24424	11101	18221	--	--
pme0368	579.17	271.01	578.164	C27H30O14	[M+H]+	Apigenin-7-O-rutinoside (Isorhoifolin)	Flavonoids	Flavonoid	552-57-8	3	26222	27627	30686	14623	44908	31659	24652	21210	19055	4426.2	7847.8	9	9	18577	8400.2	13578	12991	12446	11228	22979	23264	14935	18455	15676	17394	19055	--	--
mws0047	579.17	271.07	578.164	C27H30O14	[M+H]+	Apigenin-7-O-neohesperidoside (Rhoifolin)	Flavonoids	Flavonoid	17306-46-6	3	13745	6602.6	5858.8	9815.4	5637.8	5761.7	6515.5	6605.2	35140	7467.1	7357.5	11841	12760	13698	22004	13286	1054.6	9803.8	14093	14980	12334	13424	14487	9796.2	10394	12893	C12627	ko00944
pme2493	579.17	287.1	578.164	C27H30O14	[M+H]+	Kaempferol-3,7-O-dirhamnoside (Kaempferitrin)	Flavonoids	Flavonols	482-38-2	3	42164	35735	33983	31090	40550	49028	41964	21874	28332	15552	27019	37396	34384	42348	13729	20752	18805	31686	26836	29822	23862	25497	33381	23997	29880	28872	C16981	--
mws1409	578.9	402.6	580.034	C15H22N2O18P2	[M-H]-	Uridine-5'-diphosphoglucuronic acid	Nucleotides and derivatives	Nucleotides and derivatives	-	3	38038	41134	58160	29538	37778	28700	56586	104460	71812	36665	35464	34562	27871	42352	30771	12910	5805.5	6038.8	24579	39667	28745	26178	30908	28811	25637	32473	--	--
HJAP148	581.15	287.06	580.142	C26H28O15	[M+H]+	Kaempferol-3-O-sambubioside	Flavonoids	Flavonols	27661-51-4	1	9352700	13848000	13361000	14186000	14071000	13858000	19104000	14829000	10235000	1947900	2054100	1485000	1901300	2211900	1575100	1057700	1656100	1635600	6514300	7097700	5560800	6514400	5829900	7108100	6994700	7395600	--	--
MWSHY0056	581.19	273.08	580.179	C27H32O14	[M+H]+	Naringenin-7-O-Rutinoside(Narirutin)	Flavonoids	Dihydroflavone	14259-46-2	2	10165	8660.2	7360	18821	6229	32431	10664	21186	38164	19698	22107	30921	17462	27753	16514	53429	47000	57687	49733	35160	14717	54908	31889	24812	27550	20769	C09793	--
pmb4486	579.3	267.2	580.312	C29H40N8O5	[M-H]-	Hordatine B	Alkaloids	Phenolamine	10502-21-3	2	64371	48821	58804	92162	49118	93316	115290	103990	82450	48371	52232	67087	43623	51908	25976	233660	242570	171560	74913	77229	88396	74436	88554	76393	84538	85551	C08308	--
Xmzn007677	580.36	506.33	581.264	C33H35N5O5	[M-H]-	Ergotamine	Alkaloids	Plumerane	113-15-5	3	22020000	18217000	21292000	12994000	19188000	11166000	18470000	12245000	17948000	9736800	9139500	8580000	13548000	11384000	14704000	4452700	3670800	4129200	12164000	11645000	11818000	12051000	12341000	11708000	12033000	11990000	C07544	ko01110
pmb0492	584.28	325	583.268	C34H37N3O6	[M+H]+	N',N'',N'''-p-Coumaroyl-cinnamoyl-caffeoyl spermidine	Alkaloids	Phenolamine	-	3	284960	378900	418880	302440	258420	410230	467400	417840	401930	295290	399200	383320	230590	227640	222090	1182200	1456000	1025000	470490	511600	567640	616290	542180	609010	586850	676760	--	--
Hmgp003641	593.18	447.13	592.177	C28H32O14	[M+H]+	Chrysoeriol-6-C-rhamnoside-7-O-rhamnoside	Flavonoids	Flavonoid carbonoside	-	2	16374	6889.7	5184.7	12463	6355.8	12354	6926.4	8782.7	46031	39066	33284	50875	30333	28977	47908	115470	134600	75294	63074	63675	59389	65926	60783	72918	69920	62214	--	--
pmp001288	593.19	285.1	592.179	C28H32O14	[M+H]+	Acacetin-7-O-rutinoside (Linarin)	Flavonoids	Flavonoid	480-36-4	1	368570	233260	196350	422700	153320	254310	246500	287010	988050	1638700	1351800	2115800	1024100	1225900	1730900	5145300	5699800	3451400	2294800	2502700	2509500	2747600	2786200	2656900	2519300	2583200	--	--
MWSHY0061	595.16	287.06	594.158	C27H30O15	[M+H]+	Kaempferol-3-O-neohesperidoside	Flavonoids	Flavonols	32602-81-6	1	3393400	2871100	3037600	3588800	3288900	3467900	3769400	4845500	2688200	2556000	3369100	3330900	2929600	3488100	3039300	2564500	2843100	2984300	3066100	2702000	2938400	2599900	3315200	3313900	3223600	2577600	--	--
MWSslk254	595.17	287.06	594.158	C27H30O15	[M+H]+	Kaempferol-3-O-glucorhamnoside	Flavonoids	Flavonols	40437-72-7	1	5101600	4110500	4691700	6194500	4263700	5682000	5372800	5803500	4014700	4122600	4559700	4275200	4107900	3980100	3604100	3044700	3772700	3331400	3654200	3849300	3325000	3444000	3766100	3592100	3808600	4361500	--	--
MWSHY0050	595.17	287.05	594.158	C27H30O15	[M+H]+	Kaempferol-3-O-rutinoside(Nicotiflorin)	Flavonoids	Flavonols	17650-84-9	1	4133600	3602100	3980100	4534300	3386300	4255900	4576700	5501900	3458000	3025900	3902100	3078100	3582000	3342200	2923200	2871600	2800300	2837600	3539100	3366900	3025800	3075000	3163600	3348100	3385200	3414300	C21833	ko00944,ko01110
pmp000593	595.17	449.1	594.158	C27H30O15	[M+H]+	Luteolin-7-O-rutinoside	Flavonoids	Flavonoid	3563-98-2	1	743980	399040	235440	804450	683900	790550	1016300	841290	597150	296260	294080	435530	340060	356320	389990	570930	475210	624430	460680	467930	503500	568980	494630	536500	473200	549400	--	--
Lmjp002596	597.14	303.05	596.138	C26H28O16	[M+H]+	Quercetin-3-O-sambubioside*	Flavonoids	Flavonols	83048-35-5	1	3236800	427760	252210	457170	443900	618750	308550	993940	7772200	8652900	7313500	8313900	8297300	8157600	7781700	18964000	14617000	17687000	5477000	4804300	5896600	6098300	7018800	5730200	5979800	6515000	C12637	ko00944
Lmtp004044	597.14	303.04	596.138	C26H28O16	[M+H]+	Quercetin-3-O-apiosyl(1→2)galactoside*	Flavonoids	Flavonols	-	1	3373000	508180	295070	602770	683010	720430	432930	1107800	7324700	8873600	7876700	8252200	8107300	8634300	7583400	17159000	14941000	16675000	6079200	5552500	6050000	6646000	6731700	5641600	5239300	5994900	--	--
mws1519	595.17	287.06	596.174	C27H32O15	[M-H]-	Eriodictyol-7-O-Rutinoside (Eriocitrin)	Flavonoids	Dihydroflavone	13463-28-0	2	2866100	2606100	2495700	2886000	2892700	3147700	2799800	3624000	2335300	2081800	2618900	2844800	2816400	2664500	2572200	1728500	2321600	2297200	2679800	2293000	2655100	2722600	2862400	2793000	3076700	3006800	C09732	--
pmp000277	603.39	453.34	602.382	C35H54O8	[M+H]+	3β-[(Arabinosyl)oxy]-19β-hydroxyurs-12,20(30)-dien-28-oic acid	Terpenoids	Triterpene Saponin	-	2	43143	87539	70994	66215	34666	76075	63944	198080	130260	81059	35707	33485	18786	36766	29364	32011	41801	21283	68894	76748	74064	75569	72753	88596	70486	71618	--	--
Lmqn000780	606.08	384.98	607.082	C17H27N3O17P2	[M-H]-	Uridine 5'-diphospho-N-acetylglucosamine	Nucleotides and derivatives	Nucleotides and derivatives	528-04-1	3	41146	23959	32175	25891	46353	34424	56246	30263	32081	38719	22182	19838	29373	24647	13342	4482.3	6744	5481.5	22294	17500	22031	21086	21624	21993	23120	23501	C00043	ko00520,ko01100
Hmjp003008	609.14	287.06	608.138	C27H28O16	[M+H]+	Luteolin-7-O-glucuronide-5-O-rhamnoside	Flavonoids	Flavonoid	-	1	8446300	6934800	7573900	9613000	7906400	9818600	8186600	11607000	6534800	5064600	4402800	6371400	4316900	6808000	3740500	14966000	8476200	13646000	5942400	7613500	6913400	7563200	7474600	9439800	8007200	8505200	--	--
MWSHY0190	609.18	301.08	608.174	C28H32O15	[M+H]+	Diosmetin-7-O-rutinoside (Diosmin)	Flavonoids	Dihydroflavone	520-27-4	2	94497	206830	59808	399830	52152	45664	92415	49479	28170	411030	50861	220350	149700	125010	132730	414170	1543500	347470	188390	204570	199250	277830	267120	193890	206030	209650	C10039	--
MWSslk165	609.18	301.08	608.174	C28H32O15	[M+H]+	Diosmetin-7-O-Neohesperidoside (Neodiosmin)	Flavonoids	Dihydroflavone	38665-01-9	2	110480	243850	99029	473400	84582	99788	143370	87901	62943	547730	77738	267760	153430	114080	163610	502900	1976700	351420	262160	236870	259090	217180	236930	274710	296780	274100	--	--
mws0059	609.15	301	610.153	C27H30O16	[M-H]-	Quercetin-3-O-rutinoside (Rutin)	Flavonoids	Flavonols	153-18-4	1	535140	15518	14955	28842	24755	29938	19111	63196	429020	1149100	1226600	1719800	1219000	1007300	1205800	1902800	1783600	1543900	1076900	1224500	1007200	903730	819260	945040	1001700	980320	C05625	ko00944,ko01100,ko01110
Lmbp002336	611.16	303.05	610.153	C27H30O16	[M+H]+	Quercetin-3-O-(2''-O-rhamnosyl)galactoside	Flavonoids	Flavonols	-	2	201900	202960	173350	125970	75907	204480	91009	142730	157250	196420	262790	161640	201140	274900	163360	133560	120580	129760	40655	52989	48169	34472	41741	54854	40480	30864	--	--
Lmjp002461	611.16	303.05	610.153	C27H30O16	[M+H]+	Quercetin-3-O-neohesperidoside	Flavonoids	Flavonols	117611-67-3	1	1288600	75561	49700	125250	96650	109260	52926	175240	1338900	5804600	5048700	5876800	4181200	5419100	4115900	7822100	5975400	6733900	2704700	3322300	2864400	3253400	3466100	2895400	3292600	3440200	--	--
Lmyn001269	609.15	285.04	610.154	C27H30O16	[M-H]-	Kaempferol-3-O-sophoroside	Flavonoids	Flavonols	19895-95-5	2	596370	848150	729990	564460	379040	555670	610790	811410	620600	660610	290760	490920	301910	280080	336930	1215900	2389100	774120	310160	300350	371100	349420	277940	299530	306860	302270	C12634	ko00944
MWS0132	611.15	306.07	612.152	C20H32N6O12S2	[M-H]-	Oxiglutatione	Amino acids and derivatives	Amino acids and derivatives	27025-41-8	1	1847600	1753100	1662200	990100	1494700	1615200	1917200	2529700	1760300	2395100	1791600	2240700	1370100	1688600	1295700	1467000	1348900	1251000	1048700	1510000	1774600	1586000	1618400	1545400	1454600	1552600	C00127	ko00480,ko01100
Rfmb26201	621.22	417.16	622.226	C30H38O14	[M-H]-	Syringaresinol-4'-O-(6''-acetyl)glucoside	Lignans and Coumarins	Lignans	-	3	6240.2	7968.4	8414.2	12573	3678	10066	5399.7	8606.6	2781.4	7715.5	10409	33549	8630.8	11452	12624	51272	80182	31328	80544	82192	71114	104420	79635	87400	70358	59388	--	--
HJAP120	625.17	317.07	624.168	C28H32O16	[M+H]+	Rhamnetin-3-O-Rutinoside	Flavonoids	Flavonols	-	2	162620	54178	30112	43864	33330	73697	38114	77432	315640	79705	1097400	1610600	771010	1353600	899720	4949300	3365700	3400700	1256300	1126600	1363700	1065000	1255300	1090000	1356000	1624600	--	--
Zmxp002867	625.17	301.07	624.168	C28H32O16	[M+H]+	Chrysoeriol-5,7-di-O-glucoside	Flavonoids	Flavonoid	-	3	79566	108250	99255	118440	97430	118160	108470	116280	45283	6828.8	16193	7810.2	21236	7354	10292	2133	8381.5	2667.5	58238	78194	47971	45902	64218	43377	62328	61850	--	--
Lmmp002963	625.18	317.06	624.169	C28H32O16	[M+H]+	6-C-Methylquercetin-3-O-rutinoside	Flavonoids	Flavonols	-	1	122690	81611	93397	78422	65523	81093	65137	56955	170380	561650	430660	1295700	404480	587490	571260	1573100	1042000	1405600	820610	810670	805140	959090	909530	882600	856430	1029700	--	--
MWSHY0064	625.17	317.07	624.169	C28H32O16	[M+H]+	Isorhamnetin-3-O-neohespeidoside	Flavonoids	Flavonols	55033-90-4	2	47540	44114	40802	32482	38335	58798	41220	44186	215300	1232900	1079800	1457700	609780	1318900	808990	4980600	3100700	3242300	1343700	1385100	1225400	1336300	1418500	1394000	1242400	1323600	--	--
Lmsp003939	625.18	317.07	624.169	C28H32O16	[M+H]+	Isorhamnetin-3-O-galactoide-7-O-rhamnoside	Flavonoids	Flavonols	-	1	211900	45419	42987	31361	41321	65780	33303	66924	340000	530890	373390	511500	647290	689610	435590	528130	602060	465110	857050	671830	738850	990220	918260	756370	833040	848250	--	--
MWSHY0135	625.18	317.08	624.169	C28H32O16	[M+H]+	Isorhamnetin-3-O-rutinoside (Narcissin)	Flavonoids	Flavonols	604-80-8	2	137800	52320	38555	53481	33310	56540	36504	63987	286710	1407600	1050600	1557300	706400	1421600	1036900	4998200	3161700	3437600	1307200	1553300	1385100	1232300	1630600	1369600	1657100	1577100	--	--
Lmsp004045	625.18	317.07	624.169	C28H32O16	[M+H]+	Isorhamnetin-3-O-glucoside-7-O-rhamnoside	Flavonoids	Flavonols	-	1	359280	47716	39454	65228	54073	50881	46565	97207	477330	446920	421180	815840	601260	655560	540960	574480	548950	505730	800310	1234300	781390	886490	1198000	945550	1008200	948190	--	--
Hmln002149	623.2	461.17	624.205	C29H36O15	[M-H]-	Acteoside	Phenolic acids	Phenolic acids	61276-17-3	3	57794	64805	80344	85491	66405	66585	80464	69765	68532	29188	13240	13890	16466	28177	25489	22963	29335	17482	63599	55214	41472	44152	43568	39860	36905	32349	C10501	--
MWStz038	625.26	325.11	624.247	C36H36N2O8	[M+H]+	Grossamide	Alkaloids	Phenolamine	80510-06-1	1	92575	354900	73159	53106	43280	49376	30537	153980	40742	48115	87645	412830	270740	40046	377900	256090	800050	61968	1939400	2125000	2383700	2122700	2293400	2332900	2347600	2429000	--	--
pmp001311	627.16	303.1	626.148	C27H30O17	[M+H]+	6-Hydroxykaempferol-7,6-O-Diglucoside	Flavonoids	Flavonols	-	1	16865	7693.4	1502.3	5333.2	9	3133.9	1634.7	4269.8	42534	287080	172670	402300	162390	205120	193560	873020	674270	448530	190500	230280	211100	201530	204330	250980	158380	241300	--	--
Lmmp002796	627.16	319.05	626.148	C27H30O17	[M+H]+	Gossypetin-3-O-rutinoside	Flavonoids	Flavonols	-	2	61997	1972.8	8047.5	7616.8	5917.8	8375	2445.8	9096.2	126870	480410	419200	499140	384080	537130	284230	837070	467300	634980	120150	174940	207250	227700	170780	212970	187300	230360	--	--
Lmsp003729	627.16	319.05	626.148	C27H30O17	[M+H]+	Myricetin-3-O-rutinoside	Flavonoids	Flavonols	-	1	66710	10517	2502.6	5881.5	8400.1	7811.6	5849.3	10548	89025	551050	412390	543100	375260	437800	405650	582810	578320	597340	159080	187460	228920	153490	251610	253730	197460	199650	--	--
Lmtp003677	627.16	303.04	626.148	C27H30O17	[M+H]+	Quercetin-3-O-sophoroside (Baimaside)	Flavonoids	Flavonols	18609-17-1	3	114480	93571	74628	72830	127100	170300	80987	91924	75466	87256	42032	37712	91907	54160	63246	65307	91838	57788	65020	82555	75438	83761	98870	69807	65212	79390	C12667	ko00944
pmb0618	627.19	465.1	626.185	C28H34O16	[M+H]+	Hesperetin-8-C-glucoside-3'-O-glucoside	Flavonoids	Flavonoid carbonoside	-	2	2665.5	1719.5	1716.8	6826.2	3621.8	6658.9	1390	4027.3	26124	99766	73509	129700	50752	91281	61364	267170	264560	129220	76951	51678	54963	59260	59554	88213	100550	78011	--	--
Hmlp002975	639.15	493.1	638.139	C28H30O17	[M+H]+	Isorhamnetin-3-O-glucuronide-7-O-rhamnoside	Flavonoids	Flavonols	-	3	13328	2288.8	3534	5274.5	594.5	3511.5	3773.5	6999.8	27219	54360	61031	129560	39352	60895	52859	295030	178890	178770	60935	91796	87093	72730	108560	92363	84075	85773	--	--
Hmgn002038	637.18	475.14	638.184	C29H34O16	[M-H]-	β-Oxoacteoside	Phenolic acids	Phenolic acids	-	3	10072	38791	15722	23878	3053.5	21213	18787	30934	42877	63629	113690	87130	70548	71578	47806	55111	117780	71413	34200	45323	35747	50757	43572	41894	53339	63295	--	--
Lmmp002560	641.13	303.05	640.128	C27H28O18	[M+H]+	Quercetin-3-O-(2''-O-glucosyl)glucuronide	Flavonoids	Flavonols	-	3	30645	4738.2	3078.8	11093	12125	2153.9	3040.5	5632.4	73756	79475	102140	164300	95219	81091	87001	342560	278510	305650	119730	135610	166700	141130	123750	162590	112990	147740	--	--
Hmcp001578	641.17	479.11	640.163	C28H32O17	[M+H]+	Isorhamnetin-3,7-O-diglucoside	Flavonoids	Flavonols	6758-51-6	3	3787.2	2236.5	2251.1	1786.1	3194	2195.3	3784.4	7593	10148	38809	30434	46670	32717	43710	44507	115640	94066	69120	80262	74959	96838	96016	107720	93145	103720	99683	--	--
Lmsp003252	641.17	317.07	640.164	C28H32O17	[M+H]+	Isorhamnetin-3-O-sophoroside	Flavonoids	Flavonols	-	2	9239.9	745.6	1762	1530.3	1258.2	1999.3	3266.5	2768.2	12051	63849	45763	73086	55893	54956	58293	186120	187200	107380	127940	124560	155130	128040	163530	152520	161340	133270	--	--
mws1506	639.19	161	640.2	C29H36O16	[M-H]-	Plantamajoside	Phenolic acids	Phenolic acids	104777-68-6	1	17741	17735	19887	27885	21412	29633	26593	33058	31894	38965	41700	37758	22914	41356	21712	33447	39554	20035	36694	35032	30426	34014	30334	30637	26403	24887	C10485	--
pmb0530	664.12	136.2	663.109	C21H27N7O14P2	[M+H]+	Nicotinic acid adenine dinucleotide	Nucleotides and derivatives	Nucleotides and derivatives	53-84-9	1	895280	896110	1049200	864020	1250200	831160	1258100	1342600	1135000	828050	904190	987120	851340	884360	899870	312910	376210	345740	572140	591970	658250	813070	671710	724630	643900	658200	C00003	ko00190,ko00730,ko00760,ko01100
Hmqp003184	667.15	287.06	666.143	C29H30O18	[M+H]+	Luteolin-7-O-(6''-malonyl)glucoside-5-O-arabinoside	Flavonoids	Flavonoid	-	3	218210	168670	166970	156470	188120	204120	202570	232660	118290	84231	134590	100430	106970	109980	88337	30031	25590	18380	135560	110720	133260	127700	142940	133170	145320	144880	--	--
Lmhp008744	677.37	261.22	676.367	C33H56O14	[M+H]+	1-α-Linolenoyl-glycerol-2,3-di-O-glucoside	Lipids	Glycerol ester	-	1	248810	259350	272350	294720	283410	399770	357310	153660	346290	210260	440150	328750	380330	363080	200120	193790	742250	226840	340050	228020	229120	492390	278600	373690	310710	382060	--	--
Lmhp008513	677.37	261.22	676.367	C33H56O14	[M+H]+	2-α-Linolenoyl-glycerol-1,3-di-O-glucoside	Lipids	Glycerol ester	-	1	281420	372080	251360	256320	970530	372190	394250	208830	302960	181490	307780	212030	311290	340930	237570	179400	224750	316960	282160	202680	259850	307260	240100	265710	305900	347770	--	--
Lmhp009384	679.39	263.24	678.383	C33H58O14	[M+H]+	1-Linoleoylglycerol-2,3-di-O-glucoside	Lipids	Glycerol ester	-	1	27150	39957	25150	42277	33083	40251	61322	30872	33853	35302	68039	46746	32500	30583	28523	55671	113090	68013	36276	35461	64874	51089	63102	53937	35406	40201	--	--
Lmhp009190	679.39	263.24	678.383	C33H58O14	[M+H]+	2-Linoleoylglycerol-1,3-di-O-glucoside	Lipids	Glycerol ester	-	1	22458	24494	29830	47356	40136	71663	66166	30552	49078	33764	48075	61069	38340	30766	18224	62515	76305	75800	38608	38463	40484	40260	38487	62517	59409	59765	--	--
Hmlp003185	681.17	287.05	680.159	C30H32O18	[M+H]+	Luteolin-7-O-(6''-malonyl)glucoside-5-O-rhamnoside	Flavonoids	Flavonoid	-	3	145470	121800	141550	91448	121400	110200	164280	123560	60765	27326	24698	30556	29430	21706	19441	41578	31916	49884	42330	78768	55140	67301	58165	54082	87894	83988	--	--
Lmsn006130	679.37	517.32	680.377	C36H56O12	[M-H]-	2α,3β,19α-Trihydroxyurs-12-en-23,28-dioic acid-28-O-glucoside	Terpenoids	Triterpene Saponin	-	3	17594	15981	23021	19033	21972	21685	16649	23035	28607	37845	50346	55593	32813	42323	36478	30385	36325	34262	17915	22371	21339	31406	20776	21378	28366	22540	--	--
Lmmp003266	683.15	303.05	682.138	C29H30O19	[M+H]+	Quercetin-3-O-(2''-malonyl)glucoside-7-O-arabinoside	Flavonoids	Flavonols	-	3	25301	5976	1777.5	3883.5	1772.2	2942.8	886.25	6470.2	39800	99920	106020	81149	116280	80452	99334	54326	62222	43460	107720	116710	99321	135170	119040	127550	99410	103600	--	--
pmn001370	681.24	519.19	682.247	C32H42O16	[M-H]-	Pinoresinol-4,4'-O-di-O-glucoside	Lignans and Coumarins	Lignans	63902-38-5	2	214780	308090	326670	394580	256520	344300	344060	296250	269110	161080	182770	236210	83574	162020	171000	135330	125840	138430	265840	199800	167590	144390	167420	148990	172920	199990	--	--
Xmyp004678	727.21	287.05	726.201	C32H38O19	[M+H]+	Kaempferol-3-O-(2-O-Xylosyl-6-O-Rhamnosyl)Glucoside	Flavonoids	Flavonols	-	1	6045000	8359300	6733600	6470200	7635100	7502500	9879600	6910700	5007400	265860	308200	246990	417960	376180	273590	355880	417250	365410	1579300	2040800	1818900	1945100	1933300	1922300	1595200	1738900	--	--
Zmlp003063	741.23	433.12	740.209	C33H40O19	[M+H]+	Luteolin-7-O-(2''-O-rhamnosyl)rutinoside	Flavonoids	Flavonoid	-	2	513810	651670	608020	640800	540000	628870	667780	626980	443590	82231	66120	88084	81741	80040	96661	81286	91856	111930	292230	322130	330710	336480	351100	344320	367050	348660	--	--
Hmmn003584	739.19	593.14	740.209	C33H40O19	[M-H]-	Luteolin-7-O-rutinoside-5-O-rhamnoside	Flavonoids	Flavonoid	-	2	27333	36890	34424	24738	34734	30063	35777	36387	28049	468.77	1458.9	846.85	900.98	286.4	931.73	936.81	1024.6	1323	12088	12255	11363	14595	11808	10310	11636	10529	--	--
mws1035	741.22	433	740.216	C33H40O19	[M+H]+	Kaempferol-3-O-robinoside-7-O-rhamnoside (Robinin)	Flavonoids	Flavonols	301-19-9	2	444020	498940	502940	545950	457710	491150	566350	510020	433160	63597	52508	79084	75191	66348	78942	76142	90880	96579	289580	226910	308350	284350	297660	285440	311460	320620	C10178	--
Lmsp003881	741.22	287.06	740.216	C33H40O19	[M+H]+	Kaempferol-3-O-rutinoside-7-O-rhamnoside	Flavonoids	Flavonols	-	1	21223000	23990000	19904000	25507000	18549000	21414000	27152000	19663000	17281000	2803800	2636500	3081200	3121700	3206600	3339500	3055300	3632100	4687100	14040000	12063000	10970000	12418000	14532000	12887000	14508000	13191000	--	--
Hmcp001618	743.2	449.1	742.195	C32H38O20	[M+H]+	Quercetin-3-O-(2''-O-Xylosyl)rutinoside	Flavonoids	Flavonols	129235-39-8	3	67667	107510	91604	80815	94816	67318	104020	76877	60671	8241.8	9904.5	16025	9149.3	15147	13277	17810	17575	11150	49187	40808	48509	57860	42713	54946	68471	61372	C10175	ko00944
HJAP061	743.2	303.05	742.195	C32H38O20	[M+H]+	Quercetin-3-O-(2''-O-arabinosyl)rutinoside	Flavonoids	Flavonols	-	1	876000	56083	46681	55736	87752	94893	38990	155460	995020	1837600	1367000	1401500	2663000	1727200	1841600	3301700	2391000	2500200	1035100	1237400	1271100	1445100	1445200	1195200	1405800	1256300	--	--
Hmqp002870	743.2	287.06	742.196	C32H38O20	[M+H]+	Luteolin-7-O-Sophoroside-5-O-arabinoside	Flavonoids	Flavonoid	-	2	1053500	1079900	1178700	1026400	1018100	1686000	1459500	1225300	851100	104180	107250	141680	161850	149570	192800	156540	179810	221170	637190	767840	520580	696690	637930	717330	690340	717470	--	--
pme2651	742.1	620.1	743.075	C21H28N7O17P3	[M-H]-	NADP (Nicotinamide adenine dinucleotide phosphate)	Nucleotides and derivatives	Nucleotides and derivatives	53-59-8	3	991220	809940	789780	786470	975020	762370	961870	959440	1103300	923370	1090200	744580	905530	854380	778010	41549	55886	91530	341290	477510	547680	477060	528490	398250	393230	404650	C00006	ko00195,ko00480,ko00760,ko01100
Lmyp003857	753.13	287.06	752.122	C35H28O19	[M+H]+	Kaempferol-3-O-(2'',6''-digalloyl)glucoside	Flavonoids	Flavonols	-	2	375410	495560	582020	482770	410290	433630	467650	417340	343940	6181.9	3480	7228.8	3194.6	5121.3	3299.2	6485	4150.3	8017.3	205960	243760	199560	267890	294110	287610	221330	288300	--	--
MWSslk184	753.23	205.05	754.232	C34H42O19	[M-H]-	3,6'-Disinapoyl sucrose	Phenolic acids	Phenolic acids	139891-98-8	2	26194	18574	15226	20580	10787	12162	16050	24244	43710	45264	28416	63550	37866	50073	95220	47450	56495	35760	37131	27179	27061	27400	23498	32749	26585	24967	--	--
pmp001105	757.22	287.06	756.211	C33H40O20	[M+H]+	Kaempferol-3-O-neohesperidoside-7-O-glucoside	Flavonoids	Flavonols	-	3	8399.7	9171.8	17616	10358	11478	1958	5034.6	6776.9	29434	73092	85407	65944	78502	59721	46699	189810	143860	153390	79137	67971	78555	80145	78353	65556	69639	79226	--	--
Lnrp102163	757.21	303.05	756.211	C33H40O20	[M+H]+	Quercetin-3-O-rutinoside-7-O-rhamnoside	Flavonoids	Flavonols	-	3	66645	16884	15222	20842	16321	13463	11785	28130	43449	64144	84021	143320	87826	56860	100600	117690	75048	93864	28783	31619	18789	18176	52985	39156	22515	28600	--	--
pmb0639	757.22	595.2	756.211	C33H40O20	[M+H]+	Apigenin-8-C-glucoside-7-O-Sophoroside	Flavonoids	Flavonoid carbonoside	-	3	2828.8	2218.6	1421.4	1805.7	3114.3	2787.8	3116.2	2259.5	8662.8	17112	19897	13924	19084	12980	12361	42829	35161	28621	17410	21982	17124	16705	6529.3	15010	15698	15181	--	--
Zmgp002857	757.22	303.05	756.211	C33H40O20	[M+H]+	Quercetin-3-O-rhamnosyl (1→2)-[rhamnosyl (1→6)]glucoside	Flavonoids	Flavonols	-	2	1412400	108240	97162	130960	127070	123010	94674	239250	2304200	6981900	6536200	6439000	5828700	4407100	3703500	10524000	10124000	9213800	3628700	3974700	3919300	4274800	4018200	3606700	2826600	4418600	--	--
Hmcp001559	757.22	317.06	756.211	C33H40O20	[M+H]+	Isorhamnetin-3-O-rutinoside-7-O-arabinoside	Flavonoids	Flavonols	-	3	1226.7	1221.3	306.05	909.28	900.41	2719.8	1238.3	604.93	2458.8	7680.3	8581.6	2410.8	9507.4	2768.8	2140.5	22397	17177	14376	6180.9	6387.6	5787.9	7992.7	8233.2	4638.7	5863.3	4855	--	--
Lmsp003161	757.22	287.06	756.211	C33H40O20	[M+H]+	Kaempferol-3-O-sophoroside-7-O-rhamnoside	Flavonoids	Flavonols	-	2	258270	385660	423630	460110	440580	429840	403190	329890	198840	6284.8	7215.7	11797	2919	10179	6723.2	9197.5	3897.2	9215.1	126410	142890	139660	131950	149680	157680	152560	148670	--	--
Lmpp003268	757.22	287.06	756.211	C33H40O20	[M+H]+	Kaempferol-3-O-rutinoside-7-O-glucoside	Flavonoids	Flavonols	-	3	61860	24838	58960	15623	25544	58087	29672	46580	16975	25483	46406	59353	43458	2043	46107	21639	26442	52589	63731	54772	86286	78109	75311	84854	70261	61874	--	--
HJAP127	757.22	303.05	756.212	C33H40O20	[M+H]+	Quercetin-3-O-(2''-O-Rhamnosyl)rutinoside	Flavonoids	Flavonols	55696-57-6	1	1271600	125950	102000	137370	114510	134150	117920	215370	2213700	6620400	5582700	5784100	4079500	4403900	3873200	10752000	9344100	8100200	3693000	3531700	3303400	3815400	4218000	4107600	3773200	3302100	--	--
Hmcp001329	759.2	303.05	758.191	C32H38O21	[M+H]+	Quercetin-3-O-xylosyl(1→2)glucosyl(1→2)glucoside	Flavonoids	Flavonols	-	1	4491.2	261.95	252.22	251.95	251.43	496.17	503.81	519.89	2982.9	13477	14439	6584.8	14891	6790.8	10437	23808	15761	13747	3258.6	7008.2	8214.4	9203.8	13057	14779	4914.7	11299	--	--
pmp000279	765.44	435.33	764.435	C41H64O13	[M+H]+	3β-[(Arabinosyl)oxy]-23-hydroxyurs-12,19(29)-dien-28-oic acid 28-glucosyl ester	Terpenoids	Triterpene Saponin	-	1	6689.1	17981	13382	14821	5160.3	9284	6270.4	19602	35253	18415	11839	8896.7	2979	15423	14480	7373.6	8120	6891.1	13676	14927	15517	10900	22134	23043	9956.8	16316	--	--
pmn001505	763.43	763.4	764.435	C41H64O13	[M-H]-	Oleanolic acid-3-O-xylosyl(1→3)glucuronide	Terpenoids	Triterpene Saponin	-	2	170190	293020	253700	224570	181270	225230	226020	332580	303960	340490	215790	148000	131080	182700	139040	437160	204270	309770	2954900	2854400	2810900	2994700	2965200	2775100	2815100	2851000	--	--
Cmhp005457	767.46	455.35	766.45	C41H66O13	[M+H]+	HN-saponin F;Pulsatilla saponin B；3-O-α-L-Arabinosylhederagenin-28-β-D-glucoside	Terpenoids	Triterpene Saponin	39524-13-5	2	28835	48682	51451	35887	29821	42923	41333	56392	44236	22558	10762	12888	9400	13808	8116	6413.9	6260	2283.6	20657	29448	26068	28572	25696	23567	23912	25567	--	--
Lmyp003588	769.12	303.05	768.118	C35H28O20	[M+H]+	Quercetin-3-O-(2'',6''-digalloyl)-glucoside	Flavonoids	Flavonols	-	3	100100	6680.1	4432.6	10299	7206.7	7393.3	1325.4	13873	104250	2678.1	2685.6	3536	3827.7	1333.2	912.74	10341	1343	6730.6	55607	72728	73645	61463	63055	84572	76213	90029	--	--
HJAP128	771.23	317.06	770.227	C34H42O20	[M+H]+	Isorhamnetin-3-O-rutinoside-7-O-rhamnoside	Flavonoids	Flavonols	-	1	201590	58196	38830	55738	60557	64864	58034	78618	476850	466090	545850	430410	734900	540370	689190	547360	500710	633040	952760	975430	1035900	917810	873060	872320	1054400	1030100	--	--
Lmsp002982	773.21	303.05	772.206	C33H40O21	[M+H]+	Quercetin-3-O-sophoroside-7-O-rhamnoside	Flavonoids	Flavonols	-	2	18087	3417.5	736.82	2078.3	3186.3	5104.5	2454.2	6288.7	52683	73813	54833	64313	83079	61023	54733	148220	166860	88637	37849	49559	45847	40886	42761	46650	41845	42777	--	--
Lmmp002334	773.21	303.05	772.206	C33H40O21	[M+H]+	Quercetin-3-O-rutinoside-7-O-glucoside	Flavonoids	Flavonols	-	2	29255	9	9	9	9	9	18014	6320.3	26093	134880	168720	227520	135370	106340	93708	455180	406530	330550	108600	109150	86054	91787	122620	100450	116260	113600	--	--
Lmmp002755	773.21	303.05	772.206	C33H40O21	[M+H]+	Quercetin-7-O-rutinoside-4'-O-glucoside	Flavonoids	Flavonols	-	3	45349	3360	522.5	5620	5553	3016	3338	7299.8	37509	322440	291390	379800	223460	249810	246310	245790	352760	245690	97220	121780	144830	127170	128560	116280	97517	114780	--	--
Hmmp006067	798.5	439.36	780.467	C42H68O13	[M+NH4]+	Oleanolic acid-3-O-glucosyl(1→2)glucoside	Terpenoids	Triterpene Saponin	-	2	9	9	1987.4	9	9	592.33	168.77	1701.5	1584.7	1757.5	1665.4	993.51	257.78	2135	80.655	11967	3253	7688.1	13069	15611	16259	18304	13782	17878	19248	14791	--	--
pme2746	784.15	437	785.157	C27H33N9O15P2	[M-H]-	Riboflavin 5'-Adenosine Diphosphate	Nucleotides and derivatives	Nucleotides and derivatives	146-14-5	1	3903800	3468700	3712100	3724800	3682900	3790800	3956500	4884900	4922300	3560000	3641400	3209600	3181400	2907200	3030200	2177700	2277500	1941100	2553300	2845400	2959000	2669000	2916400	2851300	3159900	2701400	C00016	ko00740,ko01100,ko01110
Hmcp001589	787.23	317.06	786.221	C34H42O21	[M+H]+	Isorhamnetin-3-O-rutinoside-4'-O-glucoside	Flavonoids	Flavonols	111393-97-6	3	1668.9	1549.1	308.37	1542.8	994.26	310.55	625.81	943.07	621.09	36332	31997	31407	41827	34177	25477	114840	139990	103940	46511	36825	43669	50935	43679	42645	50515	48300	--	--
pmb0620	787.23	625.1	786.222	C34H42O21	[M+H]+	Chrysoeriol-6,8-di-C-glucoside-7-O-glucoside	Flavonoids	Flavonoid carbonoside	-	2	4205.9	9823.2	4438	8825.4	11084	13863	6766	4677.8	4922.3	10789	11141	23483	5651	10216	12436	25602	27660	19161	9433	9874.1	10796	8762.9	11019	17352	11708	11292	--	--
Lmhp003162	787.23	625.17	786.222	C34H42O21	[M+H]+	Chrysoeriol-6,8-di-C-glucoside-4'-O-glucoside	Flavonoids	Flavonoid carbonoside	-	3	5299.7	3328.3	4627.4	3777.5	2986.2	1008.7	645.48	8682.5	3767.2	11973	19871	7213.2	10561	7556.5	2303.2	19638	17185	19047	4836.2	14206	10210	19405	11996	17202	10701	15456	--	--
pmn001535	787.1	465.1	788.107	C34H28O22	[M-H]-	1,3,4,6-Tetra-O-Galloyl-D-Glucose	Tannins	Tannin	-	3	5129	10650	8735	11613	9274	12588	12144	14053	14898	14370	19472	26882	12110	17244	9729.8	14232	15290	20286	8861.8	5590.2	8725.8	9346.8	10685	8817.5	8276.8	7963.5	--	--
Lmwp005248	903.26	287.06	902.248	C42H46O22	[M+H]+	Kaempferol-3-O-(6'''-p-Coumaroyl)glucosyl-(1→2)-Glucoside-7-O-Rhamnoside	Flavonoids	Flavonols	-	2	63083	109820	124170	97804	93974	73725	128280	83114	70445	285.19	288.86	213.1	295.71	430.77	287.26	592.35	216.69	143.97	29783	31225	30191	37552	39971	40935	37051	31769	--	--
Zmcn006984	911.5	749.45	912.508	C47H76O17	[M-H]-	Hederagenin 3-O-[β-D-glucosyl-(1-3)-a-L-rhamnopyransyl-(1-2)-a-L-arabinoside]	Terpenoids	Triterpene Saponin	-	2	74.005	9	75.973	144.07	76.547	146.7	216.81	72.324	73.349	72.857	159.57	151.33	143.91	9	71.135	72.078	220.95	219.35	1250	1672.4	869.41	1091.1	1530.4	1310.3	1973.6	1173.8	--	--
HJAP136	919.27	303.05	918.264	C39H50O25	[M+H]+	Quercetin-3-O-(2''-O-rhamnosyl)rutinoside-7-O-glucoside	Flavonoids	Flavonols	-	3	499.66	255.97	242.96	266.12	252.97	733.44	252.97	1000	513.12	5541.3	3266.9	4794.2	4727.7	2351.8	3723	4679.5	7187.1	5697.2	5148	4691.8	2357.2	5971.5	2228.8	4012.9	3951.3	2203.9	--	--
Lmhp002374	919.27	303.05	918.264	C39H50O25	[M+H]+	Quercetin-3-O-glucosyl(1→4)rhamnoside-7-O-rutinoside	Flavonoids	Flavonols	-	3	891.12	454.09	429.98	407.45	796.71	439.07	1271.1	901.13	4073.3	18965	13608	11672	16712	10833	10356	11746	15786	11265	8142	6747.7	6786.5	9471.5	7218.7	6726.2	4052.8	8077.1	--	--
HJAP123	933.28	479.12	932.28	C40H52O25	[M+H]+	Isorhamnetin-3-O-rutinoside-7-O-rutinoside	Flavonoids	Flavonols	-	3	3897.3	4607.1	301.71	1212.8	1699.4	1225.3	246.31	2178	15082	24383	26105	32451	24390	25967	23728	59971	51657	38795	22391	20538	19849	24889	25554	27022	31704	25500	--	--
MWS20196	953.09	301	954.097	C41H30O27	[M-H]-	Chebulagic acid	Tannins	Tannin	23094-71-5	2	131850	55823	18000	118450	55949	117020	8686.2	139830	2457100	1915900	1375200	2401600	551810	1777400	1252400	4783400	3298700	3922300	1662300	1714000	1780500	1622500	1829300	1886300	1895000	1792500	C10214	--
Lmxn007617	955.49	793.44	956.498	C48H76O19	[M-H]-	3-O-Rhamnosyl(1→2)glucosyl-2β,3β-dihydroxy-23-oxoolean-l2-en-28-oic acid-28-O-glucosyl ester	Terpenoids	Triterpene Saponin	-	1	2105.1	1579.9	1805.3	2980.4	1136.3	2433.7	1957.4	3912.9	1605.8	521.86	747.8	832.95	525.4	375.79	765.62	153.31	150.81	226.92	1655.4	1122.6	907.44	1356.8	761.47	1272.1	148.3	1657.9	--	--
