# Supplementary material for: Transcriptome and Metabolome Analyses Reveal Mechanisms Underlying the Response of Quinoa Seedlings to Nitrogen Fertilizers
Source: Int J Mol Sci. 2023 Jul 18;24(14):11580. doi: 10.3390/ijms241411580 (PMC10380953; doi:10.3390/ijms241411580)
Supplement: Supplementary file 1 [file ijms-24-11580-s001.zip › Table S6.xlsx]

## Sheet: Sheet1
Table S6 Differential genes of red quinoa in LN vs CK
ID	R2-4_fpkm	R2-5_fpkm	R2-6_fpkm	R1-4_fpkm	R1-5_fpkm	R1-6_fpkm	R2-4_count	R2-5_count	R2-6_count	R1-4_count	R1-5_count	R1-6_count	log2FoldChange	pvalue	padj	regulated	chr	start	end	strand	gene_name	gene_description	KEGG	KEGG pathway	NR	Swissprot	Tremble	KOG	GO	Pfam
gene-LOC110695752	21.73	23.19	20.09	2.66	3.03	2.88	562	571	426	68	73	61	-2.91222	9.13782e-20	2.95727e-15	down	NW_018742358.1	85650	87440	+	LOC110695752	--	K14493 gibberellin receptor GID1 [EC:3.-.-.-] | (RefSeq) gibberellin receptor GID1C-like (A)	ko04075: Plant hormone signal transduction	probable carboxylesterase 8 [Chenopodium quinoa]	RecName: Full=Probable carboxylesterase 8; AltName: Full=AtCXE8; EC=3.1.1.1;	SubName: Full=Uncharacterized protein {ECO:0000313|EMBL:KNA18479.1};	Arylacetamide deacetylase	GO:0052689,carboxylic ester hydrolase activity; GO:0016787,hydrolase activity; GO:0009056,catabolic process	PF07859.13:alpha/beta hydrolase fold
novel.8223	14.3697	13.5129	12.6904	1.7141	2.22973	1.73559	774	689	694	95	126	88	-2.79203	1.02035e-17	1.65108e-13	down	NW_018745454.1	3293214	3293803	+	--	--	--	--	hypothetical protein SOVF_159270 [Spinacia oleracea]	--	SubName: Full=Uncharacterized protein {ECO:0000313|EMBL:KNA08817.1};	--	--	--
gene-LOC110719422	3.96	4.06	2.55	0.18	0.22	0.2	271	264	143	12	14	11	-4.13729	8.46412e-14	9.13081e-10	down	NW_018742204.1	14977564	14985013	-	LOC110719422	--	K15925 alpha-D-xyloside xylohydrolase [EC:3.2.1.177] | (RefSeq) alpha-xylosidase 1-like (A)	--	alpha-xylosidase 1-like [Chenopodium quinoa]	RecName: Full=Alpha-xylosidase 1; EC=3.2.1.177; Flags: Precursor;	SubName: Full=Uncharacterized protein {ECO:0000313|EMBL:KNA22484.1};	Maltase glucoamylase and related hydrolases, glycosyl hydrolase family 31	GO:0048046,apoplast; GO:0005618,cell wall; GO:0009507,chloroplast; GO:0009505,plant-type cell wall; GO:0009506,plasmodesma; GO:0061634,alpha-D-xyloside xylohydrolase; GO:0046556,alpha-L-arabinofuranosidase activity; GO:0030246,carbohydrate binding; GO:0009044,xylan 1,4-beta-xylosidase activity; GO:0080176,xyloglucan 1,6-alpha-xylosidase activity; GO:0071555,cell wall organization; GO:0046686,resp…	PF01055.26:Glycosyl hydrolases family 31
gene-LOC110729694	25.31	26.43	18.97	3.93	5.75	4.03	913	908	561	140	193	119	-2.36124	4.18636e-13	3.38708e-09	down	NW_018742987.1	1875165	1881433	-	LOC110729694	--	--	--	protein IQ-DOMAIN 14-like [Chenopodium quinoa]	--	SubName: Full=Uncharacterized protein {ECO:0000313|EMBL:KNA17091.1};	--	--	PF13178.6:Protein of unknown function (DUF4005)
novel.785	0.582863	0.589713	0.314107	3.14512	13.173	13.8472	284	272	156	1562	6733	6355	4.45184	1.2915e-12	8.35938e-09	up	NW_018742393.1	6992	29466	+	--	--	K13181 ATP-dependent RNA helicase DDX27 [EC:3.6.4.13] | (RefSeq) DEAD-box ATP-dependent RNA helicase 28-like (A)	--	uncharacterized protein LOC110699443 [Chenopodium quinoa]	--	SubName: Full=Uncharacterized protein {ECO:0000313|EMBL:AAY99341.1};	--	GO:0016021,integral component of membrane	--
novel.5235	3.51213	0	29.3193	0	0	0	769	0	6519	0	0	0	-27.0139	4.6922e-12	2.5309e-08	down	NW_018744143.1	469059	471457	.	--	--	K05573 NAD(P)H-quinone oxidoreductase subunit 2 [EC:7.1.1.2] | (RefSeq) LOW QUALITY PROTEIN: uncharacterized protein LOC114581250 (A)	ko00190: Oxidative phosphorylation	hypothetical protein DCAR_001146 [Daucus carota subsp. sativus]	RecName: Full=Uncharacterized protein ycf68; AltName: Full=ORF113;	SubName: Full=Uncharacterized protein {ECO:0000313|EMBL:KZN08616.1};	--	GO:0009507,chloroplast	--
gene-LOC110693841	187.24	191.89	161.35	49.9	37.39	28.6	7456	7276	5267	1962	1386	933	-2.20366	1.12505e-11	5.20143e-08	down	NW_018744167.1	1675369	1680147	-	LOC110693841	--	K19747 BAHD acyltransferase [EC:2.3.1.-] | (RefSeq) BAHD acyltransferase DCR-like (A)	--	BAHD acyltransferase DCR-like [Chenopodium quinoa]	RecName: Full=BAHD acyltransferase DCR; EC=2.3.1.-; AltName: Full=Protein DEFECTIVE IN CUTICULAR RIDGES; AltName: Full=Protein PERMEABLE LEAVES 3;	SubName: Full=Uncharacterized protein {ECO:0000313|EMBL:KNA24284.1};	--	GO:0005737,cytoplasm; GO:0005829,cytosol; GO:0016747,transferase activity, transferring acyl groups other than amino-acyl groups; GO:0010143,cutin biosynthetic process; GO:0051179,localization; GO:0090626,plant epidermis morphogenesis; GO:0010090,trichome morphogenesis	PF02458.15:Transferase family
novel.3576	16.6418	17.6442	37.9775	0.790044	0.370758	1.4694	1323	1328	3066	64	31	110	-4.7865	1.36512e-10	5.52242e-07	down	NW_018743389.1	5355845	5356715	.	--	--	--	--	--	--	--	--	--	--
gene-LOC110711702	9.34	10.09	6.05	0	0.08	0	237	244	126	0	2	0	-8.21797	2.62411e-10	8.6922e-07	down	NW_018742418.1	6587045	6591189	+	LOC110711702	--	K13464 jasmonate ZIM domain-containing protein | (RefSeq) protein TIFY 9-like isoform X1 (A)	ko04075: Plant hormone signal transduction	protein TIFY 9-like isoform X1 [Chenopodium quinoa]	RecName: Full=Protein TIFY 9; AltName: Full=Jasmonate ZIM domain-containing protein 10; AltName: Full=Protein JASMONATE-ASSOCIATED 1; AltName: Full=Protein JAZ10;	SubName: Full=Uncharacterized protein {ECO:0000313|EMBL:KNA14931.1};	--	GO:0005634,nucleus; GO:0042803,protein homodimerization activity; GO:0003714,transcription corepressor activity; GO:0006952,defense response; GO:1903507,negative regulation of nucleic acid-templated transcription; GO:2000022,regulation of jasmonic acid mediated signaling pathway; GO:0010112,regulation of systemic acquired resistance; GO:0006355,regulation of transcription, DNA-templated; GO:00097…	PF06200.14:tify domain
gene-LOC110724770	34.6	39.42	14.83	1.44	1.98	3.16	922	1000	324	38	49	69	-3.71977	2.68585e-10	8.6922e-07	down	NW_018742770.1	3576485	3579240	-	LOC110724770	--	--	--	transmembrane protein 136-like [Chenopodium quinoa]	--	SubName: Full=Uncharacterized protein {ECO:0000313|EMBL:KNA13172.1}; Flags: Fragment;	Uncharacterized conserved protein	GO:0016021,integral component of membrane	PF03798.16:TLC domain
gene-LOC110695918	101.4	103.67	36.05	7.47	10.58	5.66	1925	1874	561	140	187	88	-3.32928	3.51152e-10	1.03312e-06	down	NW_018744311.1	400369	401807	-	LOC110695918	--	--	--	protein YLS3-like [Chenopodium quinoa]	RecName: Full=Protein YLS3; AltName: Full=Protein YELLOW-LEAF-SPECIFIC GENE 3; AltName: Full=Xylogen-like protein 9; Short=AtXYLP9; Flags: Precursor;	SubName: Full=Uncharacterized protein {ECO:0000313|EMBL:KNA24321.1};	--	GO:0031225,anchored component of membrane; GO:0005886,plasma membrane; GO:0008289,lipid binding; GO:0006869,lipid transport	PF14368.6:Probable lipid transfer
gene-LOC110736524	142.56	141.59	16.07	3.51	1.21	2.52	3041	2876	281	74	24	44	-5.29892	5.29362e-10	1.42765e-06	down	NW_018743292.1	4397846	4398881	+	LOC110736524	--	--	--	uncharacterized protein LOC110736524 [Chenopodium quinoa]	--	SubName: Full=Uncharacterized protein {ECO:0000313|EMBL:KNA14131.1};	--	--	PF04398.12:Protein of unknown function, DUF538
gene-LOC110719788	12.7	12.73	16.82	46.72	52.4	51.93	549	524	596	1994	2108	1839	1.83988	6.86501e-10	1.70902e-06	up	NW_018742487.1	222314	226586	+	LOC110719788	--	K03781 catalase [EC:1.11.1.6] | (RefSeq) catalase-like (A)	ko00380: Tryptophan metabolism; ko00630: Glyoxylate and dicarboxylate metabolism; ko01200: Carbon metabolism; ko04016: MAPK signaling pathway - plant; ko04146: Peroxisome	catalase-like [Chenopodium quinoa]	RecName: Full=Catalase; EC=1.11.1.6;	SubName: Full=Uncharacterized protein {ECO:0000313|EMBL:KNA20548.1};	Catalase	GO:0005777,peroxisome; GO:0004096,catalase activity; GO:0020037,heme binding; GO:0046872,metal ion binding; GO:0042744,hydrogen peroxide catabolic process; GO:0006979,response to oxidative stress	PF00199.19:Catalase
gene-LOC110686653	298.17	309.19	326.48	674.15	777.58	751.56	12291	12136	11032	27441	29838	25384	1.24492	8.81116e-10	2.03683e-06	up	NW_018743893.1	437582	446118	-	LOC110686653	--	K13366 polyamine oxidase [EC:1.5.3.14 1.5.3.16 1.5.3.-] | (RefSeq) polyamine oxidase-like (A)	ko00330: Arginine and proline metabolism; ko00410: beta-Alanine metabolism	polyamine oxidase-like [Chenopodium quinoa]	RecName: Full=Polyamine oxidase; EC=1.5.3.14; EC=1.5.3.15; Flags: Precursor;	SubName: Full=Polyamine oxidase {ECO:0000313|EMBL:AAM43922.1}; EC=1.4.3.4 {ECO:0000313|EMBL:AAM43922.1};	Amine oxidase	GO:0052898,N1-acetylspermidine:oxygen oxidoreductase (propane-1,3-diamine-forming) activity; GO:0052893,N1-acetylspermine:oxygen oxidoreductase (propane-1,3-diamine-forming) activity; GO:0052897,N8-acetylspermidine:oxygen oxidoreductase (propane-1,3-diamine-forming) activity; GO:0052896,spermidine oxidase (propane-1,3-diamine-forming) activity; GO:0052900,spermine oxidase (propane-1,3-diamine-for…	PF01593.24:Flavin containing amine oxidoreductase
gene-LOC110692997	95.09	99.06	64.31	10.57	2.69	3.61	3117	3092	1728	342	82	97	-3.88636	9.59972e-10	2.07117e-06	down	NW_018744137.1	1031035	1034612	+	LOC110692997	--	K12930 anthocyanidin 3-O-glucosyltransferase [EC:2.4.1.115] | (RefSeq) anthocyanidin 3-O-glucosyltransferase 7-like (A)	ko00942: Anthocyanin biosynthesis	anthocyanidin 3-O-glucosyltransferase 7-like [Chenopodium quinoa]	RecName: Full=Anthocyanidin 3-O-glucosyltransferase 2; EC=2.4.1.115 {ECO:0000269|PubMed:9535914}; AltName: Full=Flavonol 3-O-glucosyltransferase; AltName: Full=UDP-glucose flavonoid 3-O-glucosyltransferase;	SubName: Full=UDP-glucose:flavonoid 3-O-glucosyltransferase {ECO:0000313|EMBL:AMQ23635.1};	UDP-glucuronosyl and UDP-glucosyl transferase	GO:0047213,anthocyanidin 3-O-glucosyltransferase activity; GO:0009718,anthocyanin-containing compound biosynthetic process; GO:0033485,cyanidin 3-O-glucoside biosynthetic process; GO:0033330,kaempferol O-glucoside biosynthetic process; GO:0033303,quercetin O-glucoside biosynthetic process	PF00201.18:UDP-glucoronosyl and UDP-glucosyl transferase
gene-LOC110729620	78.05	80.37	61.66	18.76	20.15	10.47	3349	3284	2169	795	805	368	-2.14984	1.13491e-09	2.29557e-06	down	NW_018742987.1	1102144	1106145	+	LOC110729620	--	K19747 BAHD acyltransferase [EC:2.3.1.-] | (RefSeq) BAHD acyltransferase DCR-like (A)	--	BAHD acyltransferase DCR-like [Chenopodium quinoa]	RecName: Full=BAHD acyltransferase DCR; EC=2.3.1.-; AltName: Full=Protein DEFECTIVE IN CUTICULAR RIDGES; AltName: Full=Protein PERMEABLE LEAVES 3;	SubName: Full=Uncharacterized protein {ECO:0000313|EMBL:KNA24284.1};	--	GO:0005737,cytoplasm; GO:0005829,cytosol; GO:0016747,transferase activity, transferring acyl groups other than amino-acyl groups; GO:0010143,cutin biosynthetic process; GO:0051179,localization; GO:0090626,plant epidermis morphogenesis; GO:0010090,trichome morphogenesis	PF02458.15:Transferase family
novel.41	0	0	0	1.93815	0.854477	0.456329	0	0	0	304	138	66	9.82862	2.26289e-09	4.30788e-06	up	NW_018742204.1	5927024	5928706	-	--	--	--	--	--	--	--	--	--	--
gene-LOC110729142	5.8	5.29	10.98	0.37	0.97	0.69	687	597	1066	43	107	67	-3.47697	2.67799e-09	4.81488e-06	down	NW_018742969.1	1026260	1038325	-	LOC110729142	--	--	--	transcription initiation factor TFIID subunit 15-like isoform X1 [Chenopodium quinoa]	--	SubName: Full=Uncharacterized protein {ECO:0000313|EMBL:KNA15812.1};	RNA-binding Ran Zn-finger protein and related proteins	GO:0046872,metal ion binding	PF00641.18:Zn-finger in Ran binding protein and others
novel.7115	2.71968	2.44834	11.5537	0	0	0	108	93	466	0	0	0	-10.3585	3.1971e-09	5.16911e-06	down	NW_018744996.1	817131	817565	.	--	--	--	--	--	--	--	--	--	--
gene-LOC110684119	7.64	7.29	6.54	69.53	50.47	247.05	164	149	115	1473	1008	4343	4.14437	3.21313e-09	5.16911e-06	up	NW_018743697.1	1743397	1744800	-	LOC110684119	--	K09873 aquaporin TIP | (RefSeq) aquaporin TIP1-3-like (A)	--	aquaporin TIP1-3-like [Chenopodium quinoa]	RecName: Full=Aquaporin TIP1-3; AltName: Full=Gamma-tonoplast intrinsic protein 3; Short=Gamma-TIP3; AltName: Full=Tonoplast intrinsic protein 1-3; Short=AtTIP1;3;	SubName: Full=Uncharacterized protein {ECO:0000313|EMBL:KNA13069.1};	Aquaporin (major intrinsic protein family)	GO:0042807,central vacuole; GO:0005887,integral component of plasma membrane; GO:0009705,plant-type vacuole membrane; GO:0015204,urea transmembrane transporter activity; GO:0015250,water channel activity; GO:0034220,ion transmembrane transport; GO:0015840,urea transport; GO:0006833,water transport	PF00230.20:Major intrinsic protein
gene-LOC110736215	27.64	26.95	17.53	67.96	100.06	74.09	1464	1359	761	3554	4933	3215	1.75674	3.44626e-09	5.16911e-06	up	NW_018743292.1	1300527	1304917	+	LOC110736215	--	--	--	protein DETOXIFICATION 42-like [Chenopodium quinoa]	RecName: Full=Protein DETOXIFICATION 42 {ECO:0000303|PubMed:11739388}; Short=AtDTX42 {ECO:0000303|PubMed:11739388}; AltName: Full=Aluminum-activated citrate transporter {ECO:0000303|PubMed:18826429}; AltName: Full=AtMATE {ECO:0000303|PubMed:18826429}; AltName: Full=FRD-like protein {ECO:0000303|PubMed:12172022}; AltName: Full=Multidrug and toxic compound extrusion protein 42 {ECO:0000305}; Short=…	RecName: Full=Protein DETOXIFICATION {ECO:0000256|RuleBase:RU004914}; AltName: Full=Multidrug and toxic compound extrusion protein {ECO:0000256|RuleBase:RU004914};	Uncharacterized membrane protein, predicted efflux pump	GO:0016021,integral component of membrane; GO:0005886,plasma membrane; GO:0015297,antiporter activity; GO:0015137,citrate transmembrane transporter activity; GO:0015238,drug transmembrane transporter activity; GO:0015746,citrate transport; GO:0010044,response to aluminum ion	PF01554.18:MatE
gene-LOC110688986	6.45	5.26	3.36	0.44	0.59	0.36	281	218	120	19	24	13	-3.4159	3.5139e-09	5.16911e-06	down	NW_018743946.1	2386248	2388751	-	LOC110688986	--	K09422 transcription factor MYB, plant | (RefSeq) transcription factor MYB106-like (A)	--	transcription factor MYB106-like [Chenopodium quinoa]	RecName: Full=Transcription factor MYB106 {ECO:0000305}; AltName: Full=Myb-related protein 106 {ECO:0000303|PubMed:11597504}; Short=AtMYB106 {ECO:0000303|PubMed:11597504}; AltName: Full=Transcription factor NOEK {ECO:0000303|PubMed:18805951};	SubName: Full=Uncharacterized protein {ECO:0000313|EMBL:KNA05795.1};	Transcription factor, Myb superfamily	GO:0005634,nucleus; GO:0003677,DNA binding; GO:0000902,cell morphogenesis; GO:0035017,cuticle pattern formation; GO:1901957,regulation of cutin biosynthetic process; GO:0006355,regulation of transcription, DNA-templated; GO:0006351,transcription, DNA-templated; GO:0010091,trichome branching	PF00249.31:Myb-like DNA-binding domain
gene-LOC110723137	21.61	18.35	17.69	5.35	6.61	5.71	720	582	483	176	205	156	-1.69716	4.34805e-09	6.11808e-06	down	NW_018742720.1	1977270	1983203	+	LOC110723137	--	--	--	uncharacterized protein LOC110723137 [Chenopodium quinoa]	--	SubName: Full=Uncharacterized protein {ECO:0000313|EMBL:KNA04294.1};	--	--	PF04862.12:Protein of unknown function (DUF642)
gene-LOC110735032	8.95	12.1	11.71	1.68	2.02	2.29	334	430	358	62	70	70	-2.44535	4.9088e-09	6.61931e-06	down	NW_018743252.1	3781873	3784036	-	LOC110735032	--	K09422 transcription factor MYB, plant | (RefSeq) transcription factor MYB106-like (A)	--	transcription factor MYB106-like [Chenopodium quinoa]	RecName: Full=Transcription factor MYB106 {ECO:0000305}; AltName: Full=Myb-related protein 106 {ECO:0000303|PubMed:11597504}; Short=AtMYB106 {ECO:0000303|PubMed:11597504}; AltName: Full=Transcription factor NOEK {ECO:0000303|PubMed:18805951};	SubName: Full=Uncharacterized protein {ECO:0000313|EMBL:KNA05795.1};	Transcription factor, Myb superfamily	GO:0005634,nucleus; GO:0003677,DNA binding; GO:0000902,cell morphogenesis; GO:0035017,cuticle pattern formation; GO:1901957,regulation of cutin biosynthetic process; GO:0006355,regulation of transcription, DNA-templated; GO:0006351,transcription, DNA-templated; GO:0010091,trichome branching	PF00249.31:Myb-like DNA-binding domain
novel.8525	1.83231	1.3595	3.57683	0	0	0	116	82	230	0	0	0	-9.6576	6.8248e-09	8.83485e-06	down	NW_018745617.1	2995116	2996012	+	--	--	--	--	--	--	--	--	--	--
gene-LOC110714529	94.13	95.44	41.98	11.46	4.55	4.09	2979	2876	1089	358	134	106	-3.47732	8.50675e-09	1.05177e-05	down	NW_018745454.1	6894223	6895937	-	LOC110714529	--	K05278 flavonol synthase [EC:1.14.20.6] | (RefSeq) flavonol synthase/flavanone 3-hydroxylase-like (A)	ko00941: Flavonoid biosynthesis	flavonol synthase/flavanone 3-hydroxylase-like [Chenopodium quinoa]	RecName: Full=Flavonol synthase/flavanone 3-hydroxylase; Short=FLS; EC=1.14.11.23 {ECO:0000250|UniProtKB:Q7XZQ6}; EC=1.14.11.9 {ECO:0000250|UniProtKB:Q7XZQ6};	SubName: Full=Uncharacterized protein {ECO:0000313|EMBL:KNA06651.1};	Iron/ascorbate family oxidoreductases	GO:0005737,cytoplasm; GO:0045431,flavonol synthase activity; GO:0031418,L-ascorbic acid binding; GO:0046872,metal ion binding; GO:0045486,naringenin 3-dioxygenase activity	PF03171.20:2OG-Fe(II) oxygenase superfamily
gene-LOC110724781	63.51	63.14	17.88	3.75	1.13	0.78	1989	1883	459	116	33	20	-4.61177	8.77476e-09	1.05177e-05	down	NW_018742204.1	23432970	23436541	-	LOC110724781	--	K00475 naringenin 3-dioxygenase [EC:1.14.11.9] | (RefSeq) naringenin,2-oxoglutarate 3-dioxygenase-like (A)	ko00941: Flavonoid biosynthesis	naringenin,2-oxoglutarate 3-dioxygenase-like [Chenopodium quinoa]	RecName: Full=Naringenin,2-oxoglutarate 3-dioxygenase; EC=1.14.11.9 {ECO:0000250|UniProtKB:Q7XZQ7}; AltName: Full=FHT; AltName: Full=Flavanone-3-hydroxylase; Short=F3H;	SubName: Full=Uncharacterized protein {ECO:0000313|EMBL:KNA10570.1};	Iron/ascorbate family oxidoreductases	GO:0031418,L-ascorbic acid binding; GO:0046872,metal ion binding; GO:0045486,naringenin 3-dioxygenase activity; GO:0009813,flavonoid biosynthetic process	PF03171.20:2OG-Fe(II) oxygenase superfamily
gene-LOC110700281	5.39	4.27	4.22	15.97	33.66	36.83	195	147	125	570	1133	1091	2.6451	1.00524e-08	1.16188e-05	up	NW_018744626.1	304184	307732	+	LOC110700281	--	K16296 serine carboxypeptidase-like clade I [EC:3.4.16.-] | (RefSeq) serine carboxypeptidase-like 20 (A)	--	serine carboxypeptidase-like 20 [Chenopodium quinoa]	RecName: Full=Serine carboxypeptidase-like 20; EC=3.4.16.-; Flags: Precursor;	RecName: Full=Carboxypeptidase {ECO:0000256|RuleBase:RU361156}; EC=3.4.16.- {ECO:0000256|RuleBase:RU361156};	Serine carboxypeptidases (lysosomal cathepsin A)	GO:0005576,extracellular region; GO:0005777,peroxisome; GO:0005773,vacuole; GO:0004180,carboxypeptidase activity; GO:0016747,transferase activity, transferring acyl groups other than amino-acyl groups; GO:0019748,secondary metabolic process	PF00450.22:Serine carboxypeptidase
gene-LOC110691892	4.29	5.2	2.25	0	0	0	135	156	58	0	0	0	-9.22379	1.45823e-08	1.62734e-05	down	NW_018744092.1	3497955	3502048	+	LOC110691892	--	--	--	GDSL esterase/lipase At4g26790-like [Chenopodium quinoa]	RecName: Full=GDSL esterase/lipase At4g26790; EC=3.1.1.-; AltName: Full=Extracellular lipase At4g26790; Flags: Precursor;	SubName: Full=Uncharacterized protein {ECO:0000313|EMBL:KNA04913.1};	--	GO:0005576,extracellular region; GO:0016788,hydrolase activity, acting on ester bonds; GO:0016042,lipid catabolic process	PF00657.22:GDSL-like Lipase/Acylhydrolase
gene-LOC110706549	2.39	2.6	2.76	10.87	12.72	7.27	231	239	219	1038	1145	576	1.99032	1.90102e-08	2.05076e-05	up	NW_018744988.1	865669	871318	+	LOC110706549	--	K14963 COMPASS component SWD3 | (RefSeq) COMPASS-like H3K4 histone methylase component WDR5A (A)	--	uncharacterized WD repeat-containing protein C2A9.03-like isoform X1 [Chenopodium quinoa]	RecName: Full=Protein Mut11; AltName: Full=Mut11p;	SubName: Full=Uncharacterized protein {ECO:0000313|EMBL:KNA13308.1};	--	GO:0005634,nucleus	PF00400.32:WD domain, G-beta repeat
gene-LOC110696030	15.6	16.83	21.39	49.06	63.18	55.41	773	794	869	2401	2915	2250	1.63635	3.07182e-08	3.20688e-05	up	NW_018744311.1	1655593	1660797	+	LOC110696030	--	--	--	protein DETOXIFICATION 42-like [Chenopodium quinoa]	RecName: Full=Protein DETOXIFICATION 42 {ECO:0000303|PubMed:11739388}; Short=AtDTX42 {ECO:0000303|PubMed:11739388}; AltName: Full=Aluminum-activated citrate transporter {ECO:0000303|PubMed:18826429}; AltName: Full=AtMATE {ECO:0000303|PubMed:18826429}; AltName: Full=FRD-like protein {ECO:0000303|PubMed:12172022}; AltName: Full=Multidrug and toxic compound extrusion protein 42 {ECO:0000305}; Short=…	RecName: Full=Protein DETOXIFICATION {ECO:0000256|RuleBase:RU004914}; AltName: Full=Multidrug and toxic compound extrusion protein {ECO:0000256|RuleBase:RU004914};	Uncharacterized membrane protein, predicted efflux pump	GO:0016021,integral component of membrane; GO:0005886,plasma membrane; GO:0015297,antiporter activity; GO:0015137,citrate transmembrane transporter activity; GO:0015238,drug transmembrane transporter activity; GO:0015746,citrate transport; GO:0010044,response to aluminum ion	PF01554.18:MatE
gene-LOC110739855	27.85	32.9	29.23	107.63	210.17	365.43	344	387	296	1313	2417	3699	2.94274	3.42588e-08	3.46474e-05	up	NW_018742244.1	2276702	2278263	+	LOC110739855	--	--	--	gibberellin-regulated protein 1-like [Chenopodium quinoa]	RecName: Full=Gibberellin-regulated protein 1; AltName: Full=GAST1 protein homolog 1; Flags: Precursor;	SubName: Full=Uncharacterized protein {ECO:0000313|EMBL:KNA03885.1};	--	GO:0005618,cell wall; GO:0005576,extracellular region; GO:0009505,plant-type cell wall; GO:0009740,gibberellic acid mediated signaling pathway; GO:0009737,response to abscisic acid; GO:0009741,response to brassinosteroid; GO:0009739,response to gibberellin; GO:0009826,unidimensional cell growth	PF02704.14:Gibberellin regulated protein
gene-LOC110733933	406.3	388.85	428.88	128.21	68.39	67.55	7914	7212	6848	2466	1240	1078	-2.19036	5.86754e-08	5.75428e-05	down	NW_018743204.1	3577247	3578539	+	LOC110733933	--	--	--	early light-induced protein 1, chloroplastic-like [Chenopodium quinoa]	RecName: Full=Early light-induced protein 2, chloroplastic {ECO:0000305}; Flags: Precursor;	SubName: Full=Uncharacterized protein {ECO:0000313|EMBL:KNA05469.1};	--	GO:0009535,chloroplast thylakoid membrane; GO:0016021,integral component of membrane; GO:0009522,photosystem I; GO:0009523,photosystem II; GO:0071483,cellular response to blue light; GO:0071490,cellular response to far red light; GO:0034605,cellular response to heat; GO:0071486,cellular response to high light intensity; GO:0071491,cellular response to red light; GO:0071492,cellular response to UV…	PF00504.21:Chlorophyll A-B binding protein
gene-LOC110737909	17.66	16.3	19.71	45.53	96.11	82.03	753	662	689	1917	3815	2866	2.05068	7.39491e-08	7.03886e-05	up	NW_018743331.1	9557121	9568566	-	LOC110737909	--	K15639 PHYB activation tagged suppressor 1 [EC:1.14.-.-] | (RefSeq) cytochrome P450 734A1-like (A)	ko00905: Brassinosteroid biosynthesis	cytochrome P450 CYP72A219-like isoform X1 [Chenopodium quinoa]	RecName: Full=Cytochrome P450 CYP72A219; EC=1.14.-.-; AltName: Full=Cytochrome P450 CYP72A129;	SubName: Full=Uncharacterized protein {ECO:0000313|EMBL:KNA06618.1};	Cytochrome P450 CYP4/CYP19/CYP26 subfamilies	GO:0016021,integral component of membrane; GO:0020037,heme binding; GO:0005506,iron ion binding; GO:0004497,monooxygenase activity; GO:0016705,oxidoreductase activity, acting on paired donors, with incorporation or reduction of molecular oxygen	PF00067.22:Cytochrome P450
gene-LOC110708232	12.03	15.6	4.13	0.88	0.19	0.28	732	904	206	53	11	14	-4.47843	8.62878e-08	7.97866e-05	down	NW_018745024.1	334418	337372	+	LOC110708232	--	K23618 acyl-activating enzyme 11/12 [EC:6.2.1.2 6.2.1.-] | (RefSeq) butyrate--CoA ligase AAE11, peroxisomal-like (A)	--	probable acyl-activating enzyme 6 [Chenopodium quinoa]	RecName: Full=Probable acyl-activating enzyme 6; EC=6.2.1.-; AltName: Full=AMP-binding protein 6; Short=AtAMPBP6;	SubName: Full=Uncharacterized protein {ECO:0000313|EMBL:KNA07316.1};	Acyl-CoA synthetase	GO:0016874,ligase activity; GO:0006631,fatty acid metabolic process	PF00501.28:AMP-binding enzyme
gene-LOC110706001	21.37	21.01	15.76	46.14	80.75	72.66	612	573	370	1305	2153	1705	1.78669	1.09125e-07	9.54487e-05	up	NW_018744895.1	530434	534917	+	LOC110706001	--	--	--	WAT1-related protein At5g40230-like [Chenopodium quinoa]	RecName: Full=WAT1-related protein At5g40230;	RecName: Full=WAT1-related protein {ECO:0000256|RuleBase:RU363077};	--	GO:0016021,integral component of membrane; GO:0005886,plasma membrane; GO:0022857,transmembrane transporter activity	PF00892.20:EamA-like transporter family
gene-LOC110720959	5.76	6.85	5.18	1.27	1.81	1.22	358	406	264	78	105	62	-2.04502	1.2377e-07	0.000102323	down	NW_018742577.1	2676777	2680849	+	LOC110720959	--	--	--	uncharacterized protein LOC110720959 isoform X1 [Chenopodium quinoa]	RecName: Full=Uncharacterized protein At5g41620;	SubName: Full=Uncharacterized protein {ECO:0000313|EMBL:KNA25229.1}; Flags: Fragment;	--	GO:0009507,chloroplast; GO:0005886,plasma membrane	PF05837.12:Centromere protein H (CENP-H)
novel.4735	0.060631	0	0	2.3969	3.34417	2.51997	4	0	0	132	190	128	6.91437	1.24308e-07	0.000102323	up	NW_018743955.1	2001556	2004281	-	--	--	K03165 DNA topoisomerase III [EC:5.6.2.1] | (RefSeq) DNA topoisomerase 3-alpha-like (A)	ko03440: Homologous recombination	PREDICTED: uncharacterized protein LOC104883809 [Beta vulgaris subsp. vulgaris]	--	SubName: Full=Uncharacterized protein {ECO:0000313|EMBL:CCA66009.1};	FOG: Reverse transcriptase	GO:0003676,nucleic acid binding; GO:0004523,RNA-DNA hybrid ribonuclease activity	--
gene-LOC110711147	14.74	12.74	8	0.58	0.18	1.14	616	507	274	24	7	39	-4.16482	1.26469e-07	0.000102323	down	NW_018745240.1	1446576	1448605	-	LOC110711147	--	K23618 acyl-activating enzyme 11/12 [EC:6.2.1.2 6.2.1.-] | (RefSeq) butyrate--CoA ligase AAE11, peroxisomal-like (A)	--	probable acyl-activating enzyme 6 [Chenopodium quinoa]	RecName: Full=Probable acyl-activating enzyme 6; EC=6.2.1.-; AltName: Full=AMP-binding protein 6; Short=AtAMPBP6;	SubName: Full=Uncharacterized protein {ECO:0000313|EMBL:KNA07316.1};	Acyl-CoA synthetase	GO:0016874,ligase activity; GO:0006631,fatty acid metabolic process	PF00501.28:AMP-binding enzyme
gene-LOC110711300	11.46	9.09	4.49	1.41	1.42	1	797	602	256	97	92	57	-2.68149	1.55481e-07	0.000116203	down	NW_018745251.1	2938089	2943878	-	LOC110711300	--	K02540 DNA replication licensing factor MCM2 [EC:3.6.4.12] | (RefSeq) DNA replication licensing factor MCM2-like (A)	ko03030: DNA replication	DNA replication licensing factor MCM2-like [Chenopodium quinoa]	RecName: Full=DNA replication licensing factor MCM2; EC=3.6.4.12; AltName: Full=Minichromosome maintenance protein 2; Short=OsMCM2;	RecName: Full=DNA helicase {ECO:0000256|SAAS:SAAS00536514}; EC=3.6.4.12 {ECO:0000256|SAAS:SAAS00536514};	DNA replication licensing factor, MCM2 component	GO:0005829,cytosol; GO:0042555,MCM complex; GO:0000347,THO complex; GO:0005524,ATP binding; GO:0003677,DNA binding; GO:0003678,DNA helicase activity; GO:0046872,metal ion binding; GO:0007049,cell cycle; GO:0006270,DNA replication initiation; GO:0006268,DNA unwinding involved in DNA replication; GO:0009793,embryo development ending in seed dormancy; GO:0042127,regulation of cell proliferation; GO:…	PF00493.23:MCM P-loop domain
gene-LOC110731545	15.92	15.37	18.05	3.41	4.96	2.26	680	625	632	144	197	79	-2.22795	1.55752e-07	0.000116203	down	NW_018743074.1	418928	423801	+	LOC110731545	--	K13508 glycerol-3-phosphate acyltransferase [EC:2.3.1.15 2.3.1.198] | (RefSeq) glycerol-3-phosphate 2-O-acyltransferase 4-like isoform X1 (A)	ko00561: Glycerolipid metabolism; ko00564: Glycerophospholipid metabolism	glycerol-3-phosphate 2-O-acyltransferase 4-like isoform X1 [Chenopodium quinoa]	RecName: Full=Glycerol-3-phosphate 2-O-acyltransferase 4; Short=AtGPAT4; EC=2.3.1.198; AltName: Full=Glycerol-3-phosphate acyltransferase 4;	SubName: Full=Uncharacterized protein {ECO:0000313|EMBL:KNA19467.1};	--	GO:0016021,integral component of membrane; GO:0016020,membrane; GO:0090447,glycerol-3-phosphate 2-O-acyltransferase activity; GO:0016791,phosphatase activity; GO:0102419,sn-2-glycerol-3-phosphate omega-OH-C22:0-CoA acyl transferase activity; GO:0010143,cutin biosynthetic process; GO:0008654,phospholipid biosynthetic process	PF12710.7:haloacid dehalogenase-like hydrolase
gene-LOC110732619	57.97	64.09	66.35	137.69	215.79	220.56	1763	1856	1654	4135	6109	5496	1.60979	1.57385e-07	0.000116203	up	NW_018743175.1	4499814	4503814	-	LOC110732619	--	K08235 xyloglucan:xyloglucosyl transferase [EC:2.4.1.207] | (RefSeq) probable xyloglucan endotransglucosylase/hydrolase protein 30 (A)	--	probable xyloglucan endotransglucosylase/hydrolase protein 30 [Chenopodium quinoa]	RecName: Full=Probable xyloglucan endotransglucosylase/hydrolase protein 30; Short=At-XTH30; Short=XTH-30; EC=2.4.1.207; Flags: Precursor;	RecName: Full=Xyloglucan endotransglucosylase/hydrolase {ECO:0000256|RuleBase:RU361120}; EC=2.4.1.207 {ECO:0000256|RuleBase:RU361120};	--	GO:0048046,apoplast; GO:0005618,cell wall; GO:0004553,hydrolase activity, hydrolyzing O-glycosyl compounds; GO:0016762,xyloglucan:xyloglucosyl transferase activity; GO:0042546,cell wall biogenesis; GO:0071555,cell wall organization; GO:0010411,xyloglucan metabolic process	PF00722.21:Glycosyl hydrolases family 16
gene-LOC110694523	112.58	105.22	18.61	3.28	4.85	7.06	1771	1576	240	51	71	91	-3.9137	1.59107e-07	0.000116203	down	NW_018744239.1	1661028	1662287	+	LOC110694523	--	--	--	MLP-like protein 423 [Chenopodium quinoa]	RecName: Full=MLP-like protein 423;	SubName: Full=Uncharacterized protein {ECO:0000313|EMBL:KNA24457.1};	--	GO:0016020,membrane; GO:0006952,defense response; GO:0009607,response to biotic stimulus	PF00407.19:Pathogenesis-related protein Bet v I family
gene-LOC110706336	46.4	48.84	37.32	4.36	0.45	1.19	1327	1330	875	123	12	28	-4.40406	1.61578e-07	0.000116203	down	NW_018744955.1	486512	488897	-	LOC110706336	--	K20628 expansin | (RefSeq) expansin-A10-like (A)	--	expansin-A10-like [Chenopodium quinoa]	RecName: Full=Expansin-A5; Short=AtEXPA5; AltName: Full=Alpha-expansin-5; Short=At-EXP5; Short=AtEx5; AltName: Full=Ath-ExpAlpha-1.4; Flags: Precursor;	SubName: Full=Uncharacterized protein {ECO:0000313|EMBL:KNA04903.1};	--	GO:0005618,cell wall; GO:0005576,extracellular region; GO:0016020,membrane; GO:0009664,plant-type cell wall organization; GO:0080022,primary root development; GO:0009826,unidimensional cell growth	PF01357.21:Pollen allergen
gene-LOC110712549	36.03	35.7	36.77	4.81	8.3	2.04	1488	1404	1245	196	319	69	-2.86552	1.74964e-07	0.000123094	down	NW_018745323.1	1296675	1298680	+	LOC110712549	--	K21995 unsaturated fatty acid epoxidase [EC:1.14.-.-] | (RefSeq) cytochrome P450 77A2-like (A)	ko00073: Cutin, suberine and wax biosynthesis	cytochrome P450 77A2-like [Chenopodium quinoa]	RecName: Full=Cytochrome P450 77A1; EC=1.14.-.-; AltName: Full=CYPLXXVIIA1; AltName: Full=Cytochrome P-450EG6; Flags: Fragment;	SubName: Full=Uncharacterized protein {ECO:0000313|EMBL:KNA10060.1};	Cytochrome P450 CYP2 subfamily	GO:0020037,heme binding; GO:0005506,iron ion binding; GO:0004497,monooxygenase activity; GO:0016705,oxidoreductase activity, acting on paired donors, with incorporation or reduction of molecular oxygen	PF00067.22:Cytochrome P450
gene-LOC110735199	78.43	80.64	14.62	2.08	6.46	4.09	3207	3140	490	84	246	137	-3.76733	2.43022e-07	0.000167339	down	NW_018743252.1	9521097	9526000	+	LOC110735199	--	K00083 cinnamyl-alcohol dehydrogenase [EC:1.1.1.195] | (RefSeq) probable cinnamyl alcohol dehydrogenase 6 isoform X1 (A)	ko00940: Phenylpropanoid biosynthesis	probable cinnamyl alcohol dehydrogenase 6 isoform X1 [Chenopodium quinoa]	RecName: Full=Probable cinnamyl alcohol dehydrogenase 6 {ECO:0000305}; Short=OsCAD6 {ECO:0000303|PubMed:15452707}; EC=1.1.1.195 {ECO:0000305};	SubName: Full=Uncharacterized protein {ECO:0000313|EMBL:KNA09004.1};	Alcohol dehydrogenase, class V	GO:0045551,cinnamyl-alcohol dehydrogenase activity; GO:0052747,sinapyl alcohol dehydrogenase activity; GO:0008270,zinc ion binding; GO:0009809,lignin biosynthetic process	PF08240.12:Alcohol dehydrogenase GroES-like domain
gene-LOC110701979	63.94	70.34	6.11	0.65	0.9	0	1980	2074	155	20	26	0	-6.48247	2.61547e-07	0.000176342	down	NW_018744662.1	1958795	1961797	-	LOC110701979	--	--	--	protodermal factor 1-like [Chenopodium quinoa]	RecName: Full=Protodermal factor 1; Flags: Precursor;	SubName: Full=Uncharacterized protein {ECO:0000313|EMBL:KMS94996.1};	--	GO:0005576,extracellular region	--
gene-LOC110725334	28.4	32.25	13.13	2.61	0.5	0.46	1269	1372	481	115	21	17	-4.30246	2.8794e-07	0.000190176	down	NW_018742810.1	2317792	2320137	-	LOC110725334	--	K05278 flavonol synthase [EC:1.14.20.6] | (RefSeq) flavonol synthase/flavanone 3-hydroxylase-like (A)	ko00941: Flavonoid biosynthesis	flavonol synthase/flavanone 3-hydroxylase-like [Chenopodium quinoa]	RecName: Full=Flavonol synthase/flavanone 3-hydroxylase; Short=FLS; EC=1.14.11.23 {ECO:0000250|UniProtKB:Q7XZQ6}; EC=1.14.11.9 {ECO:0000250|UniProtKB:Q7XZQ6};	SubName: Full=Uncharacterized protein {ECO:0000313|EMBL:KNA06651.1};	Iron/ascorbate family oxidoreductases	GO:0005737,cytoplasm; GO:0045431,flavonol synthase activity; GO:0031418,L-ascorbic acid binding; GO:0046872,metal ion binding; GO:0045486,naringenin 3-dioxygenase activity	PF03171.20:2OG-Fe(II) oxygenase superfamily
gene-LOC110714775	10.31	9.26	10.3	29.77	29.21	38.06	248	212	203	707	654	750	1.71635	3.4836e-07	0.00022548	up	NW_018745461.1	603556	606567	+	LOC110714775	--	K03686 molecular chaperone DnaJ | (RefSeq) uncharacterized protein LOC110724190 isoform X1 (A)	--	chaperone protein dnaJ 20, chloroplastic-like [Chenopodium quinoa]	RecName: Full=Chaperone protein dnaJ 20, chloroplastic; Short=AtDjC20; Short=AtJ20; Flags: Precursor;	SubName: Full=Uncharacterized protein {ECO:0000313|EMBL:KNA13499.1};	Molecular chaperone (DnaJ superfamily)	GO:0009507,chloroplast; GO:0005634,nucleus; GO:0061077,chaperone-mediated protein folding; GO:1902395,regulation of 1-deoxy-D-xylulose-5-phosphate synthase activity; GO:0010322,regulation of isopentenyl diphosphate biosynthetic process, methylerythritol 4-phosphate pathway	PF00226.31:DnaJ domain
gene-LOC110738425	2.47	2.06	3.74	10.09	20.84	31.69	199	158	247	803	1564	2093	2.91989	4.08926e-07	0.000259492	up	NW_018743389.1	2840664	2845825	-	LOC110738425	--	--	--	--	--	--	--	--	--
gene-LOC110715072	6.37	7.91	6.12	18.05	19.78	19.61	203	240	160	568	587	512	1.50706	5.50193e-07	0.000342421	up	NW_018745470.1	190253	194706	+	LOC110715072	--	--	--	protein IQ-DOMAIN 1-like [Chenopodium quinoa]	RecName: Full=Protein IQ-DOMAIN 1 {ECO:0000303|PubMed:15960618};	SubName: Full=Uncharacterized protein {ECO:0000313|EMBL:KNA03054.1};	--	GO:0005737,cytoplasm; GO:0005874,microtubule; GO:0005634,nucleus; GO:0005516,calmodulin binding; GO:0008017,microtubule binding	PF00612.27:IQ calmodulin-binding motif
gene-LOC110712271	85.15	88.44	21.91	2.61	6.66	8.54	3736	3695	788	113	272	307	-3.42296	5.83395e-07	0.000356234	down	NW_018745291.1	1311250	1314301	+	LOC110712271	--	K15397 3-ketoacyl-CoA synthase [EC:2.3.1.199] | (RefSeq) 3-ketoacyl-CoA synthase 10-like (A)	ko00062: Fatty acid elongation; ko04626: Plant-pathogen interaction	3-ketoacyl-CoA synthase 10-like [Chenopodium quinoa]	RecName: Full=3-ketoacyl-CoA synthase 10 {ECO:0000303|PubMed:18465198}; Short=KCS-10 {ECO:0000303|PubMed:18465198}; EC=2.3.1.199 {ECO:0000305}; AltName: Full=Protein FIDDLEHEAD {ECO:0000303|PubMed:10559443}; AltName: Full=Very long-chain fatty acid condensing enzyme 10 {ECO:0000303|PubMed:18465198}; Short=VLCFA condensing enzyme 10 {ECO:0000303|PubMed:18465198};	RecName: Full=3-ketoacyl-CoA synthase {ECO:0000256|PIRNR:PIRNR036417}; EC=2.3.1.- {ECO:0000256|PIRNR:PIRNR036417};	--	GO:0005783,endoplasmic reticulum; GO:0005789,endoplasmic reticulum membrane; GO:0016021,integral component of membrane; GO:0016020,membrane; GO:0102336,3-oxo-arachidoyl-CoA synthase activity; GO:0102337,3-oxo-cerotoyl-CoA synthase activity; GO:0102338,3-oxo-lignoceronyl-CoA synthase activity; GO:0102756,very-long-chain 3-ketoacyl-CoA synthase activity; GO:0006633,fatty acid biosynthetic process; …	PF08392.12:FAE1/Type III polyketide synthase-like protein
novel.5773	0	0	0	1.54359	0.764978	0.7551	0	0	0	120	61	54	8.74665	6.58727e-07	0.00037483	up	NW_018744394.1	947096	947925	.	--	--	--	--	--	--	--	--	--	--
novel.7216	7.93458	8.72377	3.41423	1.87345	1.69185	1.35226	1727	1798	755	416	387	278	-1.92221	6.62508e-07	0.00037483	down	NW_018745003.1	1259689	1262073	+	--	--	--	--	--	--	--	--	--	--
gene-LOC110707878	9.77	10.35	9.92	33.82	31.38	51.79	215	217	179	735	643	934	1.98465	6.68735e-07	0.00037483	up	NW_018745003.1	2568140	2571765	+	LOC110707878	--	K07936 GTP-binding nuclear protein Ran | (RefSeq) GTP-binding nuclear protein Ran-3-like (A)	ko03008: Ribosome biogenesis in eukaryotes; ko03013: RNA transport	GTP-binding nuclear protein Ran-3-like [Chenopodium quinoa]	RecName: Full=GTP-binding nuclear protein Ran-3; AltName: Full=Ras-related nuclear protein 3;	RecName: Full=GTP-binding nuclear protein {ECO:0000256|RuleBase:RU363057};	GTPase Ran/TC4/GSP1 (nuclear protein transport pathway), small G protein superfamily	GO:0005794,Golgi apparatus; GO:0005634,nucleus; GO:0009506,plasmodesma; GO:0005525,GTP binding; GO:0003924,GTPase activity; GO:0006606,protein import into nucleus; GO:0000054,ribosomal subunit export from nucleus	PF00071.22:Ras family
gene-LOC110703458	22.18	25.12	27.12	56.39	108.89	107.98	891	961	893	2237	4072	3554	1.87372	6.7176e-07	0.00037483	up	NW_018744718.1	3617986	3629314	+	LOC110703458	--	--	--	protein PIN-LIKES 7-like [Chenopodium quinoa]	RecName: Full=Protein PIN-LIKES 7 {ECO:0000303|PubMed:22504182}; AltName: Full=Auxin efflux carrier-like protein 7 {ECO:0000303|PubMed:22504182};	SubName: Full=Uncharacterized protein {ECO:0000313|EMBL:KNA06835.1};	Predicted membrane protein	GO:0005789,endoplasmic reticulum membrane; GO:0016021,integral component of membrane; GO:0009734,auxin-activated signaling pathway; GO:0009733,response to auxin; GO:0055085,transmembrane transport	PF03547.18:Membrane transport protein
novel.7217	7.96864	8.78128	3.43294	1.88372	1.70981	1.35967	1725	1800	755	416	389	278	-1.91981	6.84042e-07	0.000375214	down	NW_018745003.1	1259702	1262073	-	--	--	--	--	--	--	--	--	--	--
novel.2531	4.87439	4.7054	2.57238	10.5044	18.8784	20.4527	455	416	244	999	1849	1799	2.14035	7.14266e-07	0.000385263	up	NW_018743021.1	1108360	1109382	.	--	--	--	--	hypothetical protein BVRB_5g125770 [Beta vulgaris subsp. vulgaris]	--	SubName: Full=Uncharacterized protein {ECO:0000313|EMBL:KMS97608.1};	--	--	--
gene-LOC110701732	2.78	2.57	2.91	0.3	0.25	0.47	180	158	154	19	15	25	-3.00212	7.49805e-07	0.000397803	down	NW_018744656.1	317347	322959	-	LOC110701732	--	K13415 protein brassinosteroid insensitive 1 [EC:2.7.10.1 2.7.11.1] | (RefSeq) systemin receptor SR160-like (A)	ko04075: Plant hormone signal transduction	probable LRR receptor-like serine/threonine-protein kinase At4g37250 [Chenopodium quinoa]	RecName: Full=Probable LRR receptor-like serine/threonine-protein kinase At4g37250; EC=2.7.11.1; Flags: Precursor;	SubName: Full=Uncharacterized protein {ECO:0000313|EMBL:KNA13278.1};	--	GO:0016021,integral component of membrane; GO:0005524,ATP binding; GO:0004674,protein serine/threonine kinase activity	PF00069.25:Protein kinase domain
gene-LOC110701407	6.8	4.27	4.03	0.32	0.87	0.36	303	181	147	14	36	13	-3.30398	8.2168e-07	0.000423178	down	NW_018744633.1	7242330	7249754	-	LOC110701407	--	--	--	uncharacterized protein LOC110701407 [Chenopodium quinoa]	--	SubName: Full=Uncharacterized protein {ECO:0000313|EMBL:KDP23747.1};	--	--	PF03080.15:Neprosin
novel.1704	1.72748	1.49463	3.51487	0	0	0	65	54	135	0	0	0	-8.90361	8.23787e-07	0.000423178	down	NW_018742733.1	2801158	2801569	.	--	--	--	--	--	--	--	--	--	--
gene-LOC110702851	15.43	14.29	14.87	34.66	35.51	32.55	423	373	334	938	906	731	1.214	8.63948e-07	0.000436874	up	NW_018742393.1	1043397	1046079	+	LOC110702851	--	--	--	uncharacterized protein LOC110702851 [Chenopodium quinoa]	--	SubName: Full=uncharacterized protein LOC106762046 {ECO:0000313|RefSeq:XP_014501216.1};	--	GO:0016021,integral component of membrane	PF03350.16:Uncharacterized protein family, UPF0114
gene-LOC110702412	11.03	12.35	22.28	1.21	0.22	1.37	482	514	798	52	9	49	-3.99877	9.09481e-07	0.000452823	down	NW_018744693.1	118471	120592	+	LOC110702412	--	K15398 fatty acid omega-hydroxylase [EC:1.14.-.-] | (RefSeq) cytochrome P450 86A22-like (A)	ko00073: Cutin, suberine and wax biosynthesis	cytochrome P450 86A22-like [Chenopodium quinoa]	RecName: Full=Cytochrome P450 86A22 {ECO:0000303|PubMed:19940120}; EC=1.14.13.204 {ECO:0000269|PubMed:19940120}; AltName: Full=Long-chain acyl-CoA omega-monooxygenase {ECO:0000305};	SubName: Full=Uncharacterized protein {ECO:0000313|EMBL:KNA25514.1};	Cytochrome P450 CYP4/CYP19/CYP26 subfamilies	GO:0016021,integral component of membrane; GO:0020037,heme binding; GO:0005506,iron ion binding; GO:0016709,oxidoreductase activity, acting on paired donors, with incorporation or reduction of molecular oxygen, NAD(P)H as one donor, and incorporation of one atom of oxygen; GO:0035336,long-chain fatty-acyl-CoA metabolic process	PF00067.22:Cytochrome P450
gene-LOC110693243	8.09	9.78	3.19	29.95	49.02	66.77	204	235	66	746	1151	1380	2.82408	9.88578e-07	0.000484748	up	NW_018744143.1	2123251	2127493	-	LOC110693243	--	K01953 asparagine synthase (glutamine-hydrolysing) [EC:6.3.5.4] | (RefSeq) asparagine synthetase [glutamine-hydrolyzing] 1-like (A)	ko00250: Alanine, aspartate and glutamate metabolism; ko01230: Biosynthesis of amino acids	stem-specific protein TSJT1-like [Chenopodium quinoa]	RecName: Full=Stem-specific protein TSJT1;	SubName: Full=Stem-specific protein TSJT1 {ECO:0000313|EMBL:ALU58321.1};	--	--	PF12481.8:Aluminium induced protein
gene-LOC110705423	8.16	8.78	3.35	0.83	0.29	0.53	360	369	121	36	12	19	-3.56777	1.08586e-06	0.000524504	down	NW_018744878.1	1147802	1150821	+	LOC110705423	--	--	--	protein IQ-DOMAIN 1-like [Chenopodium quinoa]	RecName: Full=Protein IQ-DOMAIN 1 {ECO:0000303|PubMed:15960618};	SubName: Full=Uncharacterized protein {ECO:0000313|EMBL:KNA25786.1};	--	GO:0005737,cytoplasm; GO:0005874,microtubule; GO:0005634,nucleus; GO:0005516,calmodulin binding; GO:0008017,microtubule binding	PF13178.6:Protein of unknown function (DUF4005)
gene-LOC110709795	11.81	11.5	6.41	1.89	1.2	0.75	423	392	188	67	40	22	-2.91767	1.19919e-06	0.00056748	down	NW_018745080.1	2716575	2721293	-	LOC110709795	--	K23277 anthranilate N-benzoyltransferase [EC:2.3.1.144] | (RefSeq) anthranilate N-benzoyltransferase protein 2-like (A)	--	protein ECERIFERUM 2-like [Chenopodium quinoa]	RecName: Full=Protein ECERIFERUM 2;	RecName: Full=NADPH--cytochrome P450 reductase {ECO:0000256|HAMAP-Rule:MF_03212}; Short=CPR {ECO:0000256|HAMAP-Rule:MF_03212}; Short=p450R {ECO:0000256|HAMAP-Rule:MF_03212}; EC=1.6.2.4 {ECO:0000256|HAMAP-Rule:MF_03212};	--	GO:0005783,endoplasmic reticulum; GO:0005634,nucleus; GO:0016747,transferase activity, transferring acyl groups other than amino-acyl groups; GO:0071555,cell wall organization; GO:0009555,pollen development; GO:0042761,very long-chain fatty acid biosynthetic process; GO:0010025,wax biosynthetic process	PF02458.15:Transferase family
gene-LOC110710691	0.27	0.1	0	3.69	12.24	18.91	3	1	0	40	125	170	6.5484	1.2099e-06	0.00056748	up	NW_018742418.1	4947294	4948340	+	LOC110710691	--	--	--	--	--	--	--	--	--
gene-LOC110695927	16.41	14.43	2.77	1.06	0.36	0.31	975	816	135	62	20	15	-4.21666	1.31521e-06	0.000608058	down	NW_018744311.1	480495	487283	-	LOC110695927	--	K00558 DNA (cytosine-5)-methyltransferase 1 [EC:2.1.1.37] | (RefSeq) DNA (cytosine-5)-methyltransferase CMT3-like (A)	ko00270: Cysteine and methionine metabolism	DNA (cytosine-5)-methyltransferase CMT3-like [Chenopodium quinoa]	RecName: Full=DNA (cytosine-5)-methyltransferase CMT3; EC=2.1.1.37; AltName: Full=Chromomethylase 3; AltName: Full=Protein CHROMOMETHYLASE 3;	RecName: Full=Cytosine-specific methyltransferase {ECO:0000256|RuleBase:RU000417}; EC=2.1.1.37 {ECO:0000256|RuleBase:RU000417};	--	GO:0005634,nucleus; GO:0003682,chromatin binding; GO:0003886,DNA (cytosine-5-)-methyltransferase activity; GO:0003677,DNA binding; GO:0006342,chromatin silencing; GO:0006306,DNA methylation; GO:0010425,DNA methylation on cytosine within a CNG sequence; GO:0051567,histone H3-K9 methylation; GO:0045814,negative regulation of gene expression, epigenetic; GO:0006351,transcription, DNA-templated; GO:0…	PF00145.17:C-5 cytosine-specific DNA methylase
gene-LOC110694747	5.81	5.09	5.25	0.92	0.94	1.15	192	160	142	30	29	31	-2.41099	1.39165e-06	0.000631718	down	NW_018744240.1	1440216	1443483	-	LOC110694747	--	--	--	F-box protein At4g35930-like isoform X1 [Chenopodium quinoa]	RecName: Full=F-box protein At4g35930;	SubName: Full=Uncharacterized protein {ECO:0000313|EMBL:KNA12959.1};	--	--	--
gene-LOC110688344	10.7	9.46	8.51	26.79	31.3	43.1	227	191	148	561	618	749	1.83934	1.40542e-06	0.000631718	up	NW_018743920.1	7757230	7758259	+	LOC110688344	--	K14686 solute carrier family 31 (copper transporter), member 1 | (RefSeq) copper transporter 6-like (A)	--	copper transporter 6-like [Chenopodium quinoa]	RecName: Full=Copper transporter 6; Short=AtCOPT6;	SubName: Full=Uncharacterized protein {ECO:0000313|EMBL:KNA10675.1};	Copper transporter	GO:0016021,integral component of membrane; GO:0005773,vacuole; GO:0005375,copper ion transmembrane transporter activity	PF04145.15:Ctr copper transporter family
novel.4743	4.75892	5.75069	6.49922	1.20659	0.488146	0.758721	372	426	516	97	41	56	-2.76296	1.48785e-06	0.000652309	down	NW_018743955.1	2949858	2950713	.	--	--	--	--	hypothetical protein BVRB_008000 [Beta vulgaris subsp. vulgaris]	RecName: Full=Protein RALF-like 33; Flags: Precursor;	SubName: Full=Uncharacterized protein {ECO:0000313|EMBL:KMS95461.1};	--	GO:0048046,apoplast; GO:0005622,intracellular; GO:0009505,plant-type cell wall; GO:0009506,plasmodesma; GO:0005179,hormone activity; GO:0004871,NA; GO:0019722,calcium-mediated signaling; GO:0007267,cell-cell signaling	PF05498.11:Rapid ALkalinization Factor (RALF)
gene-LOC110727184	64.87	65.22	50.73	5.95	0.34	1.57	2276	2179	1459	206	11	45	-4.45975	1.49948e-06	0.000652309	down	NW_018742903.1	569698	572100	+	LOC110727184	--	K00660 chalcone synthase [EC:2.3.1.74] | (RefSeq) chalcone synthase-like (A)	ko00941: Flavonoid biosynthesis; ko04712: Circadian rhythm - plant	chalcone synthase-like [Chenopodium quinoa]	RecName: Full=Chalcone synthase; EC=2.3.1.74; AltName: Full=Naringenin-chalcone synthase;	SubName: Full=Uncharacterized protein {ECO:0000313|EMBL:KNA20400.1};	--	GO:0016210,naringenin-chalcone synthase activity; GO:0009813,flavonoid biosynthetic process	PF00195.19:Chalcone and stilbene synthases, N-terminal domain
gene-LOC110704768	23.72	21.54	21.83	9.52	9.82	8.08	835	722	630	331	322	233	-1.28142	1.5117e-06	0.000652309	down	NW_018744858.1	1173204	1179540	-	LOC110704768	--	K00261 glutamate dehydrogenase (NAD(P)+) [EC:1.4.1.3] | (RefSeq) glutamate dehydrogenase B-like (A)	ko00220: Arginine biosynthesis; ko00250: Alanine, aspartate and glutamate metabolism; ko00910: Nitrogen metabolism; ko01200: Carbon metabolism	glutamate dehydrogenase B-like [Chenopodium quinoa]	RecName: Full=Glutamate dehydrogenase B; Short=GDH B; EC=1.4.1.3;	RecName: Full=Glutamate dehydrogenase {ECO:0000256|PIRNR:PIRNR000185};	Glutamate/leucine/phenylalanine/valine dehydrogenases	GO:0004353,glutamate dehydrogenase [NAD(P)+] activity; GO:0006520,cellular amino acid metabolic process	PF00208.21:Glutamate/Leucine/Phenylalanine/Valine dehydrogenase
gene-LOC110691801	6.67	5.68	1.89	23.88	31.07	32.08	232	188	54	820	1006	914	2.64305	1.77934e-06	0.000757695	up	NW_018744092.1	1810096	1812366	-	LOC110691801	--	--	--	fasciclin-like arabinogalactan protein 2 [Chenopodium quinoa]	RecName: Full=Fasciclin-like arabinogalactan protein 2; Flags: Precursor;	SubName: Full=Uncharacterized protein {ECO:0000313|EMBL:KNA19187.1};	--	GO:0031225,anchored component of membrane; GO:0046658,anchored component of plasma membrane; GO:0016020,membrane; GO:0005886,plasma membrane; GO:0005774,vacuolar membrane	PF02469.22:Fasciclin domain
gene-LOC110699635	116.04	122.07	98.63	49.07	38.01	29.39	4241	4248	2955	1771	1293	880	-1.51371	1.82466e-06	0.000763793	down	NW_018744593.1	2224734	2230139	-	LOC110699635	--	K12449 UDP-apiose/xylose synthase | (RefSeq) UDP-D-apiose/UDP-D-xylose synthase 2-like (A)	ko00520: Amino sugar and nucleotide sugar metabolism	UDP-D-apiose/UDP-D-xylose synthase 2-like [Chenopodium quinoa]	RecName: Full=UDP-D-apiose/UDP-D-xylose synthase 2;	SubName: Full=Uncharacterized protein {ECO:0000313|EMBL:KNA10509.1};	dTDP-glucose 4-6-dehydratase/UDP-glucuronic acid decarboxylase	GO:0048046,apoplast; GO:0005737,cytoplasm; GO:0005829,cytosol; GO:0003824,catalytic activity; GO:0050662,coenzyme binding; GO:0071555,cell wall organization	PF01370.21:NAD dependent epimerase/dehydratase family
gene-LOC110724462	90.66	78.97	69.57	7.35	0.9	0.41	3235	2683	2035	259	30	12	-4.73185	1.84086e-06	0.000763793	down	NW_018742764.1	691859	694301	-	LOC110724462	--	K00660 chalcone synthase [EC:2.3.1.74] | (RefSeq) chalcone synthase-like (A)	ko00941: Flavonoid biosynthesis; ko04712: Circadian rhythm - plant	chalcone synthase-like [Chenopodium quinoa]	RecName: Full=Chalcone synthase; EC=2.3.1.74; AltName: Full=Naringenin-chalcone synthase;	SubName: Full=Uncharacterized protein {ECO:0000313|EMBL:KNA20400.1};	--	GO:0016210,naringenin-chalcone synthase activity; GO:0009813,flavonoid biosynthetic process	PF00195.19:Chalcone and stilbene synthases, N-terminal domain
gene-LOC110719122	25.22	22.36	18.22	46.46	52.03	46.68	770	650	456	1401	1479	1168	1.1562	1.93042e-06	0.000790813	up	NW_018742483.1	1880955	1885818	-	LOC110719122	--	K03686 molecular chaperone DnaJ | (RefSeq) chaperone protein dnaJ GFA2, mitochondrial-like (A)	--	chaperone protein dnaJ C76, chloroplastic-like [Chenopodium quinoa]	RecName: Full=Chaperone protein dnaJ C76, chloroplastic {ECO:0000305}; Short=atDjC76 {ECO:0000303|PubMed:23894646}; AltName: Full=AtDjC17 {ECO:0000303|PubMed:25339971}; AltName: Full=AtJ17 {ECO:0000305}; Flags: Precursor;	SubName: Full=Uncharacterized protein {ECO:0000313|EMBL:KMT01966.1};	Molecular chaperone (DnaJ superfamily)	GO:0009507,chloroplast	PF00226.31:DnaJ domain
gene-LOC110714376	5.76	7.11	14.05	0.37	1.27	0.34	204	240	408	13	42	10	-3.81658	1.96696e-06	0.000795708	down	NW_018745454.1	238639	246592	-	LOC110714376	--	K16296 serine carboxypeptidase-like clade I [EC:3.4.16.-] | (RefSeq) serine carboxypeptidase-like 13 (A)	--	serine carboxypeptidase-like 13 [Chenopodium quinoa]	RecName: Full=Serine carboxypeptidase-like 18; EC=3.4.16.-; Flags: Precursor;	SubName: Full=Uncharacterized protein {ECO:0000313|EMBL:KNA20254.1}; Flags: Fragment;	Serine carboxypeptidases (lysosomal cathepsin A)	GO:0005576,extracellular region; GO:0004180,carboxypeptidase activity; GO:0016747,transferase activity, transferring acyl groups other than amino-acyl groups; GO:0019748,secondary metabolic process	PF00450.22:Serine carboxypeptidase
gene-LOC110736820	25.36	26.98	25.4	10.56	13.02	10.73	839	850	689	345	401	291	-1.17472	2.10185e-06	0.000839782	down	NW_018743292.1	7992914	7997880	+	LOC110736820	--	K03644 lipoyl synthase [EC:2.8.1.8] | (RefSeq) lipoyl synthase, chloroplastic-like (A)	ko00785: Lipoic acid metabolism	lipoyl synthase, chloroplastic-like [Chenopodium quinoa]	RecName: Full=Lipoyl synthase, chloroplastic {ECO:0000255|HAMAP-Rule:MF_03129}; EC=2.8.1.8 {ECO:0000255|HAMAP-Rule:MF_03129}; AltName: Full=Lipoate synthase {ECO:0000255|HAMAP-Rule:MF_03129}; Short=LS {ECO:0000255|HAMAP-Rule:MF_03129}; Short=Lip-syn {ECO:0000255|HAMAP-Rule:MF_03129}; AltName: Full=Lipoate synthase, plastidial {ECO:0000255|HAMAP-Rule:MF_03129}; Short=LIP1p {ECO:0000255|HAMAP-Rule:…	RecName: Full=Lipoyl synthase, chloroplastic {ECO:0000256|HAMAP-Rule:MF_03129}; EC=2.8.1.8 {ECO:0000256|HAMAP-Rule:MF_03129}; AltName: Full=Lipoate synthase {ECO:0000256|HAMAP-Rule:MF_03129}; Short=LS {ECO:0000256|HAMAP-Rule:MF_03129}; Short=Lip-syn {ECO:0000256|HAMAP-Rule:MF_03129}; AltName: Full=Lipoate synthase, plastidial {ECO:0000256|HAMAP-Rule:MF_03129}; Short=LIP1p {ECO:0000256|HAMAP-Rule:…	Lipoate synthase	GO:0009507,chloroplast; GO:0051539,4 iron, 4 sulfur cluster binding; GO:0016992,lipoate synthase activity; GO:0046872,metal ion binding	PF04055.21:Radical SAM superfamily
gene-LOC110698297	12.02	11.79	4.49	71.85	46.11	44.31	196	183	60	1157	700	592	2.56031	2.33085e-06	0.000901327	up	NW_018744504.1	420651	421442	+	LOC110698297	--	--	--	glycine-rich cell wall structural protein 2-like [Chenopodium quinoa]	--	--	--	--	--
gene-LOC110692978	83.79	82.88	92.15	169.03	200.42	211.69	1513	1425	1364	3014	3369	3132	1.17425	2.35099e-06	0.000901327	up	NW_018744137.1	819832	821835	+	LOC110692978	--	--	--	non-symbiotic hemoglobin 2-like [Chenopodium quinoa]	RecName: Full=Non-symbiotic hemoglobin 2; AltName: Full=Hb2; AltName: Full=SOLly GLB2;	SubName: Full=Non-symbiotic hemoglobin class 2 {ECO:0000313|EMBL:AHB20279.1};	Globins and related hemoproteins	GO:0020037,heme binding; GO:0046872,metal ion binding; GO:0019825,oxygen binding; GO:0006631,fatty acid metabolic process; GO:0019432,triglyceride biosynthetic process	PF00042.22:Globin
gene-LOC110704813	11.97	10.84	7.46	24.28	44.78	45.49	407	351	208	815	1417	1267	1.93224	2.35435e-06	0.000901327	up	NW_018744858.1	2469523	2477511	-	LOC110704813	--	--	--	lipid phosphate phosphatase delta-like [Chenopodium quinoa]	RecName: Full=Lipid phosphate phosphatase delta; Short=AtLPPD; EC=3.1.3.-; AltName: Full=Phosphatidic acid phosphatase delta; AltName: Full=Sphingoid phosphate phosphatase 1; Short=AtSSP1; AltName: Full=Sphingosine-1-phosphate phosphatase; Short=AtSPPASE;	SubName: Full=Uncharacterized protein {ECO:0000313|EMBL:KNA15508.1};	Sphingoid base-phosphate phosphatase	GO:0005789,endoplasmic reticulum membrane; GO:0016021,integral component of membrane; GO:0016787,hydrolase activity; GO:0009737,response to abscisic acid; GO:0006665,sphingolipid metabolic process; GO:0090332,stomatal closure	PF01569.21:PAP2 superfamily
gene-LOC110732819	1.2	1.33	1.2	3.55	8.56	8.94	86	91	71	252	573	527	2.49812	2.3673e-06	0.000901327	up	NW_018743175.1	1332128	1339374	-	LOC110732819	--	--	--	E3 ubiquitin ligase PQT3-like [Chenopodium quinoa]	RecName: Full=E3 ubiquitin ligase PQT3-like; EC=2.3.2.27 {ECO:0000250|UniProtKB:F4JP52};	SubName: Full=Uncharacterized protein {ECO:0000313|EMBL:KNA10699.1};	Predicted E3 ubiquitin ligase	GO:0005634,nucleus; GO:0003676,nucleic acid binding; GO:0016740,transferase activity; GO:0008270,zinc ion binding	PF08783.11:DWNN domain
gene-LOC110723302	53.8	52.6	47.29	109.43	105.46	90.58	1768	1646	1274	3551	3226	2439	1.00396	2.60806e-06	0.000981451	up	NW_018742726.1	2374186	2375781	+	LOC110723302	--	--	--	uncharacterized protein LOC110723302 [Chenopodium quinoa]	--	SubName: Full=Uncharacterized protein {ECO:0000313|EMBL:KNA04675.1};	Predicted E3 ubiquitin ligase	--	PF02190.16:ATP-dependent protease La (LON) substrate-binding domain
gene-LOC110711687	214.7	210.13	228.57	478.17	958.65	1284.89	5570	5191	4861	12250	23152	27313	2.0656	2.7029e-06	0.00100446	up	NW_018745281.1	2916037	2918238	-	LOC110711687	--	K08235 xyloglucan:xyloglucosyl transferase [EC:2.4.1.207] | (RefSeq) xyloglucan endotransglucosylase/hydrolase protein 24-like (A)	--	xyloglucan endotransglucosylase/hydrolase protein 24-like [Chenopodium quinoa]	RecName: Full=Xyloglucan endotransglucosylase/hydrolase protein 24; Short=At-XTH24; Short=XTH-24; EC=2.4.1.207; AltName: Full=Endo-xyloglucan transferase; AltName: Full=Meristem protein 5; Short=MERI-5 protein; Short=MERI5 protein; AltName: Full=Xyloglucan endo-1,4-beta-D-glucanase; Flags: Precursor;	RecName: Full=Xyloglucan endotransglucosylase/hydrolase {ECO:0000256|RuleBase:RU361120}; EC=2.4.1.207 {ECO:0000256|RuleBase:RU361120};	--	GO:0048046,apoplast; GO:0005618,cell wall; GO:0005737,cytoplasm; GO:0005794,Golgi apparatus; GO:0009505,plant-type cell wall; GO:0005886,plasma membrane; GO:0004553,hydrolase activity, hydrolyzing O-glycosyl compounds; GO:0016762,xyloglucan:xyloglucosyl transferase activity; GO:0042546,cell wall biogenesis; GO:0009828,plant-type cell wall loosening; GO:0071669,plant-type cell wall organization or…	PF00722.21:Glycosyl hydrolases family 16
gene-LOC110722690	5.02	5.24	4.88	1.09	1.15	0.81	173	172	138	37	37	23	-2.30118	2.7313e-06	0.00100446	down	NW_018742684.1	1567781	1573163	+	LOC110722690	--	K11979 E3 ubiquitin-protein ligase UBR7 [EC:2.3.2.27] | (RefSeq) putative E3 ubiquitin-protein ligase UBR7 (A)	--	putative E3 ubiquitin-protein ligase UBR7 [Chenopodium quinoa]	--	SubName: Full=Uncharacterized protein {ECO:0000313|EMBL:KNA13223.1};	Uncharacterized conserved protein, contains N-recognin-type Zn-finger	GO:0008270,zinc ion binding	PF02207.20:Putative zinc finger in N-recognin (UBR box)
gene-LOC110710104	22.09	20.43	23.89	6.06	9.48	6.49	661	582	586	179	264	159	-1.59945	2.87512e-06	0.00103621	down	NW_018742418.1	4358414	4362145	-	LOC110710104	--	K10251 17beta-estradiol 17-dehydrogenase / very-long-chain 3-oxoacyl-CoA reductase [EC:1.1.1.62 1.1.1.330] | (RefSeq) very-long-chain 3-oxoacyl-CoA reductase 1-like (A)	ko00062: Fatty acid elongation; ko01040: Biosynthesis of unsaturated fatty acids; ko01212: Fatty acid metabolism	very-long-chain 3-oxoacyl-CoA reductase 1-like [Chenopodium quinoa]	RecName: Full=Very-long-chain 3-oxoacyl-CoA reductase 1; EC=1.1.1.330; AltName: Full=Beta-ketoacyl reductase 1; Short=AtKCR1; AltName: Full=Protein GLOSSY 8; Short=gl8At;	SubName: Full=Uncharacterized protein {ECO:0000313|EMBL:KNA04185.1};	--	GO:0005783,endoplasmic reticulum; GO:0005789,endoplasmic reticulum membrane; GO:0016021,integral component of membrane; GO:0016020,membrane; GO:0102339,3-oxo-arachidoyl-CoA reductase activity; GO:0102340,3-oxo-behenoyl-CoA reductase activity; GO:0102342,3-oxo-cerotoyl-CoA reductase activity; GO:0102341,3-oxo-lignoceroyl-CoA reductase activity; GO:0018454,acetoacetyl-CoA reductase activity; GO:004…	PF00106.25:short chain dehydrogenase
gene-LOC110693627	46.76	50	0	0.07	0.08	0	1318	1342	0	2	2	0	-9.30301	2.88166e-06	0.00103621	down	NW_018744151.1	3388315	3390443	+	LOC110693627	--	--	--	non-classical arabinogalactan protein 30 [Chenopodium quinoa]	RecName: Full=Non-classical arabinogalactan protein 31 {ECO:0000303|PubMed:17885091}; AltName: Full=Hydroxyproline-rich arabinogalactan protein 31 {ECO:0000305}; Flags: Precursor;	SubName: Full=Uncharacterized protein {ECO:0000313|EMBL:KNA24972.1};	--	GO:0005576,extracellular region; GO:0009505,plant-type cell wall; GO:0005886,plasma membrane; GO:0009506,plasmodesma; GO:0009753,response to jasmonic acid	PF01190.17:Pollen proteins Ole e I like
gene-LOC110715099	173.02	166.75	213.31	396.93	1595.24	1413.24	2077	1906	2099	4705	17826	13900	2.60492	2.92576e-06	0.00104051	up	NW_018745470.1	1762333	1763623	+	LOC110715099	--	--	--	--	--	--	--	--	--
novel.5861	0	0	0	0.756823	0.612036	0.625508	0	0	0	70	59	54	8.39948	3.05181e-06	0.00107354	up	NW_018744495.1	22344	23335	.	--	--	--	--	uncharacterized protein LOC110738285 [Chenopodium quinoa]	RecName: Full=Sigma factor binding protein 1, chloroplastic; Short=AtsibI; Short=Sigma factor binding protein I; AltName: Full=SigA binding protein; AltName: Full=VQ motif-containing protein 23 {ECO:0000303|PubMed:22535423}; Short=AtVQ23 {ECO:0000303|PubMed:22535423}; Flags: Precursor;	SubName: Full=Uncharacterized protein {ECO:0000313|EMBL:KNA10947.1};	--	GO:0009507,chloroplast; GO:0005634,nucleus; GO:0071482,cellular response to light stimulus; GO:0009816,defense response to bacterium, incompatible interaction; GO:0051091,positive regulation of DNA-binding transcription factor activity	PF05678.14:VQ motif
gene-LOC110696530	22.87	22.6	0	0	0.02	0	1121	1055	0	0	1	0	-10.8286	3.15451e-06	0.00109774	down	NW_018744367.1	2392123	2395802	-	LOC110696530	--	--	--	GDSL esterase/lipase At1g33811-like [Chenopodium quinoa]	RecName: Full=GDSL esterase/lipase At1g33811; EC=3.1.1.-; AltName: Full=Extracellular lipase At1g33811; Flags: Precursor;	SubName: Full=Uncharacterized protein {ECO:0000313|EMBL:KNA10996.1};	--	GO:0005576,extracellular region; GO:0016788,hydrolase activity, acting on ester bonds; GO:0016042,lipid catabolic process	PF00657.22:GDSL-like Lipase/Acylhydrolase
gene-LOC110688281	2.91	2.05	2.68	0.34	0.14	0.21	155	104	117	18	7	9	-3.43935	3.20896e-06	0.0011048	down	NW_018743920.1	7150897	7154907	-	LOC110688281	--	K01657 anthranilate synthase component I [EC:4.1.3.27] | (RefSeq) anthranilate synthase alpha subunit 2, chloroplastic-like (A)	ko00400: Phenylalanine, tyrosine and tryptophan biosynthesis; ko01230: Biosynthesis of amino acids	anthranilate synthase alpha subunit 2, chloroplastic-like [Chenopodium quinoa]	RecName: Full=Anthranilate synthase alpha subunit 2, chloroplastic; EC=4.1.3.27; AltName: Full=Anthranilate synthase component 1-2; AltName: Full=Anthranilate synthase component I-2; Flags: Precursor;	SubName: Full=Uncharacterized protein {ECO:0000313|EMBL:KNA24153.1};	Isochorismate synthase	GO:0005950,anthranilate synthase complex; GO:0009507,chloroplast; GO:0004049,anthranilate synthase activity; GO:0000162,tryptophan biosynthetic process	PF00425.18:chorismate binding enzyme
gene-LOC110702045	49.62	49.43	34.99	88.59	154.21	146.63	2081	1974	1203	3669	6021	5039	1.54938	3.26601e-06	0.00111261	up	NW_018744662.1	2715344	2719814	+	LOC110702045	--	K09828 Delta24-sterol reductase [EC:1.3.1.72 1.3.1.-] | (RefSeq) delta(24)-sterol reductase-like (A)	ko00100: Steroid biosynthesis	delta(24)-sterol reductase-like [Chenopodium quinoa]	RecName: Full=Delta(24)-sterol reductase; EC=1.3.1.72; AltName: Full=Cell elongation protein diminuto;	SubName: Full=Uncharacterized protein {ECO:0000313|EMBL:KNA18210.1};	FAD-binding protein DIMINUTO	GO:0016021,integral component of membrane; GO:0005516,calmodulin binding; GO:0050614,delta24-sterol reductase activity; GO:0050660,flavin adenine dinucleotide binding; GO:0016614,oxidoreductase activity, acting on CH-OH group of donors	PF01565.23:FAD binding domain
gene-LOC110682718	29.58	29.62	0	0.03	0	0	1097	1046	0	1	0	0	-10.8068	3.32572e-06	0.00111364	down	NW_018743593.1	1022835	1026022	+	LOC110682718	--	--	--	GDSL esterase/lipase At1g33811-like [Chenopodium quinoa]	RecName: Full=GDSL esterase/lipase At1g33811; EC=3.1.1.-; AltName: Full=Extracellular lipase At1g33811; Flags: Precursor;	SubName: Full=Uncharacterized protein {ECO:0000313|EMBL:KNA10996.1};	--	GO:0005576,extracellular region; GO:0016788,hydrolase activity, acting on ester bonds; GO:0016042,lipid catabolic process	PF00657.22:GDSL-like Lipase/Acylhydrolase
gene-LOC110714030	21.31	18.68	23.87	86.84	149.2	50.6	732	611	672	2945	4770	1424	2.14076	3.33787e-06	0.00111364	up	NW_018745454.1	7045628	7049850	+	LOC110714030	--	--	--	WAT1-related protein At4g08300-like [Chenopodium quinoa]	RecName: Full=WAT1-related protein At1g21890;	RecName: Full=WAT1-related protein {ECO:0000256|RuleBase:RU363077};	--	GO:0016021,integral component of membrane; GO:0005886,plasma membrane; GO:0015171,amino acid transmembrane transporter activity; GO:0032973,amino acid export across plasma membrane; GO:0080144,amino acid homeostasis; GO:0043090,amino acid import	PF00892.20:EamA-like transporter family
gene-LOC110735109	10.75	10.55	11.06	2.21	1.3	0.61	364	340	307	74	41	17	-2.95409	3.42974e-06	0.00113262	down	NW_018743252.1	6251413	6259792	-	LOC110735109	--	K16297 serine carboxypeptidase-like clade II [EC:3.4.16.-] | (RefSeq) serine carboxypeptidase-like 25 (A)	--	serine carboxypeptidase-like 25 [Chenopodium quinoa]	RecName: Full=Serine carboxypeptidase-like 25; EC=3.4.16.-; Flags: Precursor;	RecName: Full=Carboxypeptidase {ECO:0000256|RuleBase:RU361156}; EC=3.4.16.- {ECO:0000256|RuleBase:RU361156};	Serine carboxypeptidases (lysosomal cathepsin A)	GO:0005615,extracellular space; GO:0004185,serine-type carboxypeptidase activity; GO:0009742,brassinosteroid mediated signaling pathway; GO:0051603,proteolysis involved in cellular protein catabolic process	PF00450.22:Serine carboxypeptidase
gene-LOC110683508	109.86	102.34	21.45	10.57	5.6	8.4	2443	2167	391	232	116	153	-3.1891	3.48625e-06	0.00113965	down	NW_018743669.1	1553975	1556654	+	LOC110683508	--	--	--	non-specific lipid transfer protein GPI-anchored 2-like [Chenopodium quinoa]	RecName: Full=Non-specific lipid transfer protein GPI-anchored 2; Short=AtLTPG-2; Short=Protein LTP-GPI-ANCHORED 2; AltName: Full=Xylogen-like protein 5; Short=AtXYP5; Flags: Precursor;	SubName: Full=Uncharacterized protein {ECO:0000313|EMBL:KNA14242.1};	--	GO:0031225,anchored component of membrane; GO:0046658,anchored component of plasma membrane; GO:0005886,plasma membrane; GO:0008289,lipid binding; GO:0042335,cuticle development; GO:0006869,lipid transport	PF14368.6:Probable lipid transfer
gene-LOC110711250	3.09	4.38	3.03	0.16	0.02	0	152	205	122	8	1	0	-5.7418	3.554e-06	0.00115018	down	NW_018742418.1	5939567	5948854	-	LOC110711250	--	K02685 DNA primase large subunit | (RefSeq) probable DNA primase large subunit (A)	ko03030: DNA replication	probable DNA primase large subunit [Chenopodium quinoa]	RecName: Full=Probable DNA primase large subunit; EC=2.7.7.-;	RecName: Full=DNA primase large subunit {ECO:0000256|PIRNR:PIRNR009449}; EC=2.7.7.- {ECO:0000256|PIRNR:PIRNR009449};	Eukaryotic-type DNA primase, large subunit	GO:0005658,alpha DNA polymerase:primase complex; GO:0051539,4 iron, 4 sulfur cluster binding; GO:0003896,DNA primase activity; GO:0003887,DNA-directed DNA polymerase activity; GO:0046872,metal ion binding; GO:0003697,single-stranded DNA binding	PF04104.14:Eukaryotic and archaeal DNA primase, large subunit
gene-LOC110724838	8.3	10.33	7.62	21.19	30.25	39.1	319	378	240	804	1082	1231	1.80311	3.66075e-06	0.00117045	up	NW_018742770.1	4210378	4213299	-	LOC110724838	--	--	--	RHOMBOID-like protein 9, chloroplastic [Chenopodium quinoa]	RecName: Full=RHOMBOID-like protein 9, chloroplastic {ECO:0000303|PubMed:17181860}; Short=AtRBL9 {ECO:0000303|PubMed:17181860}; EC=3.4.21.- {ECO:0000305}; Flags: Precursor;	SubName: Full=Uncharacterized protein {ECO:0000313|EMBL:KNA08550.1};	Rhomboid family proteins	GO:0031969,chloroplast membrane; GO:0016021,integral component of membrane; GO:0004252,serine-type endopeptidase activity	PF01694.22:Rhomboid family
gene-LOC110720129	21.71	20.3	15.5	39.99	68.95	64.31	574	511	336	1044	1697	1393	1.59967	3.68896e-06	0.00117045	up	NW_018742541.1	926522	941610	-	LOC110720129	--	K01953 asparagine synthase (glutamine-hydrolysing) [EC:6.3.5.4] | (RefSeq) asparagine synthetase [glutamine-hydrolyzing] 1-like (A)	ko00250: Alanine, aspartate and glutamate metabolism; ko01230: Biosynthesis of amino acids	stem-specific protein TSJT1-like [Chenopodium quinoa]	RecName: Full=Stem-specific protein TSJT1;	SubName: Full=Stem-specific protein TSJT1 {ECO:0000313|EMBL:ALU58321.1};	--	--	PF12481.8:Aluminium induced protein
novel.5486	0	0	0	1.16344	0.715702	1.63914	0	0	0	66	42	85	8.52519	3.74552e-06	0.00117686	up	NW_018744240.1	382825	383426	.	--	--	--	--	--	--	--	--	--	--
gene-LOC110687931	18.22	20.12	18.91	36.22	45.34	35.78	797	838	678	1564	1846	1282	1.03858	3.79073e-06	0.00117961	up	NW_018743920.1	3004845	3012038	+	LOC110687931	--	--	--	uncharacterized protein LOC110687931 [Chenopodium quinoa]	--	SubName: Full=Uncharacterized protein {ECO:0000313|EMBL:KNA14398.1};	START domain-containing proteins involved in steroidogenesis/phosphatidylcholine transfer	GO:0016021,integral component of membrane; GO:0008289,lipid binding	PF01852.19:START domain
gene-LOC110688223	106.85	102.75	21.36	7.9	1.25	4.67	2288	2095	375	167	25	82	-3.97937	4.02564e-06	0.00123144	down	NW_018743920.1	6661250	6663876	-	LOC110688223	--	--	--	non-specific lipid transfer protein GPI-anchored 2-like [Chenopodium quinoa]	RecName: Full=Non-specific lipid transfer protein GPI-anchored 2; Short=AtLTPG-2; Short=Protein LTP-GPI-ANCHORED 2; AltName: Full=Xylogen-like protein 5; Short=AtXYP5; Flags: Precursor;	SubName: Full=Uncharacterized protein {ECO:0000313|EMBL:KNA14242.1};	--	GO:0031225,anchored component of membrane; GO:0046658,anchored component of plasma membrane; GO:0005886,plasma membrane; GO:0008289,lipid binding; GO:0042335,cuticle development; GO:0006869,lipid transport	PF14368.6:Probable lipid transfer
gene-LOC110723219	12.49	11.47	3.26	1.15	0.47	0.53	486	425	104	44	17	17	-3.60503	4.0334e-06	0.00123144	down	NW_018742720.1	3184747	3188108	-	LOC110723219	--	--	--	--	--	--	--	--	--
gene-LOC110716300	61.5	55.55	9.32	4.69	1.8	1.86	1208	1039	150	91	33	30	-3.85254	4.1766e-06	0.00126325	down	NW_018745569.1	420615	422816	-	LOC110716300	--	K11296 high mobility group protein B3 | (RefSeq) high mobility group B protein 7-like (A)	--	high mobility group B protein 7-like [Chenopodium quinoa]	RecName: Full=High mobility group B protein 7; AltName: Full=Nucleosome/chromatin assembly factor group D 07; Short=Nucleosome/chromatin assembly factor group D 7; AltName: Full=Protein NUCLEAR FUSION DEFECTIVE 7 {ECO:0000303|PubMed:16698901};	SubName: Full=Uncharacterized protein {ECO:0000313|EMBL:KNA04843.1};	HMG box-containing protein	GO:0005634,nucleus; GO:0003677,DNA binding; GO:0003700,DNA-binding transcription factor activity; GO:0000741,karyogamy; GO:0010197,polar nucleus fusion	PF00505.19:HMG (high mobility group) box
gene-LOC110733583	3.39	3.92	7.36	0.09	0.23	0	78	86	139	2	5	0	-5.54789	4.22444e-06	0.00126589	down	NW_018743199.1	3983072	3984407	-	LOC110733583	--	K09286 EREBP-like factor | (RefSeq) ethylene-responsive transcription factor ERF060-like (A)	--	ethylene-responsive transcription factor SHINE 2-like [Chenopodium quinoa]	RecName: Full=Ethylene-responsive transcription factor SHINE 2;	SubName: Full=Uncharacterized protein {ECO:0000313|EMBL:KNA04034.1}; Flags: Fragment;	--	GO:0005634,nucleus; GO:0003677,DNA binding; GO:0003700,DNA-binding transcription factor activity; GO:0009873,ethylene-activated signaling pathway; GO:0006351,transcription, DNA-templated	PF00847.20:AP2 domain
gene-LOC110694454	6.58	6.36	6.29	13.07	16.01	13.04	388	357	304	761	879	630	1.13656	4.30875e-06	0.0012793	up	NW_018744239.1	8442109	8458189	+	LOC110694454	--	K21867 potassium channel | (RefSeq) potassium channel AKT2/3-like (A)	--	potassium channel AKT2/3-like [Chenopodium quinoa]	RecName: Full=Potassium channel AKT2/3;	SubName: Full=Uncharacterized protein {ECO:0000313|EMBL:KNA12144.1}; Flags: Fragment;	K+-channel ERG and related proteins, contain PAS/PAC sensor domain	GO:0005789,endoplasmic reticulum membrane; GO:0005887,integral component of plasma membrane; GO:0009506,plasmodesma; GO:0042802,identical protein binding; GO:0005249,voltage-gated potassium channel activity; GO:0034765,regulation of ion transmembrane transport; GO:0042391,regulation of membrane potential; GO:0009737,response to abscisic acid	PF00520.31:Ion transport protein
novel.4781	0	0	0	0.583035	0.411389	2.3307	0	0	0	47	34	173	8.99296	4.48272e-06	0.00131886	up	NW_018743955.1	7932537	7933398	.	--	--	--	--	--	--	--	--	--	--
gene-LOC110688182	16.44	13.84	14.91	40.32	42.02	60.51	308	247	229	746	733	929	1.67946	4.63378e-06	0.00133938	up	NW_018743920.1	6269799	6277375	+	LOC110688182	--	--	--	putative phosphatidylglycerol/phosphatidylinositol transfer protein DDB_G0282179 [Chenopodium quinoa]	RecName: Full=MD-2-related lipid-recognition protein ROSY1 {ECO:0000305}; AltName: Full=Protein INTERACTOR OF SYNAPTOTAGMIN 1 {ECO:0000303|PubMed:27044028}; Flags: Precursor;	SubName: Full=Uncharacterized protein {ECO:0000313|EMBL:KNA14264.1}; Flags: Fragment;	Uncharacterized conserved protein, contains ML domain	GO:0005737,cytoplasm; GO:0008429,phosphatidylethanolamine binding; GO:0032934,sterol binding; GO:0032366,intracellular sterol transport; GO:0009958,positive gravitropism; GO:0009651,response to salt stress	PF02221.15:ML domain
gene-LOC110718570	10.74	10.24	14.73	2	3.63	2.37	337	306	379	62	106	61	-2.17504	4.63523e-06	0.00133938	down	NW_018742461.1	1258787	1262243	-	LOC110718570	--	--	--	uncharacterized protein LOC110718570 [Chenopodium quinoa]	--	SubName: Full=Uncharacterized protein {ECO:0000313|EMBL:KYP44085.1};	--	--	PF01190.17:Pollen proteins Ole e I like
gene-LOC110705144	13.72	13.63	2.77	0.99	0.19	0.21	857	811	142	61	11	11	-4.35786	4.74427e-06	0.00135604	down	NW_018744874.1	2141953	2147939	-	LOC110705144	--	K02212 DNA replication licensing factor MCM4 [EC:3.6.4.12] | (RefSeq) DNA replication licensing factor MCM4-like (A)	ko03030: DNA replication	DNA replication licensing factor MCM4-like [Chenopodium quinoa]	RecName: Full=DNA replication licensing factor MCM4; EC=3.6.4.12; AltName: Full=Minichromosome maintenance protein 4; Short=AtMCM4;	RecName: Full=DNA helicase {ECO:0000256|SAAS:SAAS00536514}; EC=3.6.4.12 {ECO:0000256|SAAS:SAAS00536514};	DNA replication licensing factor, MCM4 component	GO:0005829,cytosol; GO:0042555,MCM complex; GO:0000347,THO complex; GO:0005524,ATP binding; GO:0003677,DNA binding; GO:0003678,DNA helicase activity; GO:0046872,metal ion binding; GO:0007049,cell cycle; GO:0006270,DNA replication initiation; GO:0006268,DNA unwinding involved in DNA replication	PF00493.23:MCM P-loop domain
gene-LOC110734454	3.2	3.12	1.79	0.39	0.46	0.2	216	201	99	26	29	11	-2.93613	4.7767e-06	0.00135604	down	NW_018743212.1	3270581	3277523	-	LOC110734454	--	K08857 NIMA (never in mitosis gene a)-related kinase 1/4/5 [EC:2.7.11.1] | (RefSeq) serine/threonine-protein kinase Nek2-like (A)	--	serine/threonine-protein kinase Nek2-like [Chenopodium quinoa]	RecName: Full=Serine/threonine-protein kinase Nek2; Short=OsNek2; EC=2.7.11.1; AltName: Full=NimA-related protein kinase 2;	SubName: Full=Uncharacterized protein {ECO:0000313|EMBL:KNA05533.1};	Serine/threonine protein kinase	GO:0005524,ATP binding; GO:0004674,protein serine/threonine kinase activity	PF00069.25:Protein kinase domain
gene-LOC110715590	44.45	48.7	50.24	8.59	1.51	5.32	1294	1350	1199	247	41	127	-3.16806	5.00442e-06	0.00139	down	NW_018745523.1	3446888	3450510	-	LOC110715590	--	--	--	GDSL esterase/lipase APG-like [Chenopodium quinoa]	RecName: Full=GDSL esterase/lipase APG; EC=3.1.1.-; AltName: Full=Extracellular lipase APG; Flags: Precursor;	SubName: Full=Uncharacterized protein {ECO:0000313|EMBL:KNA16300.1};	--	GO:0048046,apoplast; GO:0016788,hydrolase activity, acting on ester bonds; GO:0016042,lipid catabolic process	PF00657.22:GDSL-like Lipase/Acylhydrolase
gene-LOC110730179	40.13	31.86	15.5	125.72	105.04	104.42	1061	802	336	3282	2585	2262	1.97253	5.0655e-06	0.00139	up	NW_018743021.1	1121931	1123214	+	LOC110730179	--	--	--	glycine-rich cell wall structural protein 1.8-like [Chenopodium quinoa]	--	SubName: Full=Uncharacterized protein {ECO:0000313|EMBL:KNA13405.1};	--	--	--
gene-LOC110711360	17.37	15.54	13.7	28.88	36.21	35.48	857	730	554	1407	1663	1434	1.12158	5.06897e-06	0.00139	up	NW_018745265.1	21671	27200	+	LOC110711360	--	K19041 E3 ubiquitin-protein ligase RNF38/44 [EC:2.3.2.27] | (RefSeq) RING-H2 finger protein ATL65-like (A)	--	uncharacterized RING finger protein P4H10.07-like isoform X1 [Chenopodium quinoa]	RecName: Full=Receptor homology region, transmembrane domain- and RING domain-containing protein 4; Short=AtRMR4; Flags: Precursor;	SubName: Full=Uncharacterized protein {ECO:0000313|EMBL:KNA17759.1};	FOG: Predicted E3 ubiquitin ligase	GO:0016021,integral component of membrane; GO:0031902,late endosome membrane; GO:0032586,protein storage vacuole membrane; GO:0046872,metal ion binding; GO:0015031,protein transport	PF13639.6:Ring finger domain
gene-LOC110738261	15.09	14.46	2.71	0.82	0.3	0.06	856	781	126	46	16	3	-4.7017	5.10397e-06	0.00139	down	NW_018743382.1	107532	112673	+	LOC110738261	--	K02209 DNA replication licensing factor MCM5 [EC:3.6.4.12] | (RefSeq) DNA replication licensing factor MCM5-like (A)	ko03030: DNA replication	DNA replication licensing factor MCM5-like [Chenopodium quinoa]	RecName: Full=DNA replication licensing factor MCM5; EC=3.6.4.12; AltName: Full=Minichromosome maintenance protein 5; Short=AtMCM5;	RecName: Full=DNA helicase {ECO:0000256|SAAS:SAAS00536514}; EC=3.6.4.12 {ECO:0000256|SAAS:SAAS00536514};	DNA replication licensing factor, MCM5 component	GO:0005737,cytoplasm; GO:0042555,MCM complex; GO:0005634,nucleus; GO:0000347,THO complex; GO:0005524,ATP binding; GO:0003682,chromatin binding; GO:0003678,DNA helicase activity; GO:0003688,DNA replication origin binding; GO:0007049,cell cycle; GO:0006270,DNA replication initiation; GO:0006268,DNA unwinding involved in DNA replication	PF00493.23:MCM P-loop domain
gene-LOC110721093	72.28	55.88	73.27	22.86	20.03	24.76	1012	745	841	316	261	284	-1.56049	5.11108e-06	0.00139	down	NW_018742589.1	555066	556792	-	LOC110721093	--	K02917 large subunit ribosomal protein L35Ae | (RefSeq) 60S ribosomal protein L35a-3-like (A)	ko03010: Ribosome	60S ribosomal protein L35a-3-like [Chenopodium quinoa]	RecName: Full=60S ribosomal protein L35a-3;	SubName: Full=Uncharacterized protein {ECO:0000313|EMBL:KNA18594.1};	60S ribosomal protein L35A/L37	GO:0022625,cytosolic large ribosomal subunit; GO:0003735,structural constituent of ribosome; GO:0002181,cytoplasmic translation; GO:0042273,ribosomal large subunit biogenesis	PF01247.18:Ribosomal protein L35Ae
gene-LOC110693916	1.74	1.92	3.97	0.27	0.09	0.06	131	138	245	20	6	4	-4.17046	5.28229e-06	0.00142459	down	NW_018744167.1	2539095	2544003	-	LOC110693916	--	--	--	uncharacterized protein LOC110693916 [Chenopodium quinoa]	--	SubName: Full=Uncharacterized protein {ECO:0000313|EMBL:KNA13285.1};	--	GO:0005634,nucleus; GO:0006260,DNA replication; GO:0033314,mitotic DNA replication checkpoint; GO:0010212,response to ionizing radiation	--
gene-LOC110718372	28.99	30.68	20.37	54.25	77.81	85.95	1825	1839	1051	3372	4559	4433	1.46352	5.76557e-06	0.00153916	up	NW_018742455.1	1623750	1630769	+	LOC110718372	--	K05016 chloride channel 7 | (RefSeq) chloride channel protein CLC-b-like (A)	--	chloride channel protein CLC-b-like [Chenopodium quinoa]	RecName: Full=Chloride channel protein CLC-b; Short=AtCLC-b; AltName: Full=CBS domain-containing protein CBSCLC7;	SubName: Full=Uncharacterized protein {ECO:0000313|EMBL:KNA10255.1};	Cl- channel CLC-7 and related proteins (CLC superfamily)	GO:0034707,chloride channel complex; GO:0009705,plant-type vacuole membrane; GO:0009671,nitrate:proton symporter activity; GO:0005247,voltage-gated chloride channel activity; GO:1902476,chloride transmembrane transport; GO:0034765,regulation of ion transmembrane transport	PF00654.20:Voltage gated chloride channel
gene-LOC110682063	0.46	0.7	3.17	0	0	0	32	47	182	0	0	0	-9.0064	5.80223e-06	0.00153916	down	NW_018743574.1	3067735	3073540	-	LOC110682063	--	--	--	TSL-kinase interacting protein 1-like [Chenopodium quinoa]	RecName: Full=TSL-kinase interacting protein 1; AltName: Full=Myb-related protein TKI1;	SubName: Full=Uncharacterized protein {ECO:0000313|EMBL:KNA23491.1};	--	GO:0005634,nucleus; GO:0003682,chromatin binding; GO:0003677,DNA binding; GO:0006355,regulation of transcription, DNA-templated; GO:0006351,transcription, DNA-templated	--
gene-LOC110682493	10.45	13.43	7.61	32.47	28.37	29.16	444	543	265	1362	1122	1015	1.541	6.27188e-06	0.00165022	up	NW_018743574.1	8037938	8042887	-	LOC110682493	--	K08145 MFS transporter, SP family, solute carrier family 2 (facilitated glucose transporter), member 8 | (RefSeq) sugar transporter ERD6-like 6 (A)	--	sugar transporter ERD6-like 6 [Chenopodium quinoa]	RecName: Full=Sugar transporter ERD6-like 6;	SubName: Full=Uncharacterized protein {ECO:0000313|EMBL:KNA13733.1};	Predicted transporter (major facilitator superfamily)	GO:0005794,Golgi apparatus; GO:0016021,integral component of membrane; GO:0009705,plant-type vacuole membrane; GO:0005774,vacuolar membrane; GO:0005355,glucose transmembrane transporter activity; GO:0005351,carbohydrate:proton symporter activity; GO:0042593,glucose homeostasis; GO:0046323,glucose import; GO:0035428,NA; GO:0010030,positive regulation of seed germination	PF00083.24:Sugar (and other) transporter
gene-LOC110731562	5.99	5.29	4.44	13.79	19.47	30.59	296	249	180	673	896	1239	2.0451	6.43436e-06	0.00167035	up	NW_018743074.1	568516	571804	+	LOC110731562	--	K00924 kinase [EC:2.7.1.-] | (RefSeq) receptor protein kinase TMK1-like (A)	--	calmodulin-binding receptor-like cytoplasmic kinase 2 isoform X1 [Chenopodium quinoa]	RecName: Full=Calmodulin-binding receptor-like cytoplasmic kinase 2; EC=2.7.11.1;	SubName: Full=Uncharacterized protein {ECO:0000313|EMBL:KNA09231.1};	Serine/threonine protein kinase	GO:0005737,cytoplasm; GO:0005524,ATP binding; GO:0004674,protein serine/threonine kinase activity; GO:0009555,pollen development	PF00069.25:Protein kinase domain
gene-LOC110722241	13.48	14.32	23.82	3.75	3.57	1.84	357	361	517	98	88	40	-2.50591	6.45161e-06	0.00167035	down	NW_018742656.1	629185	649478	-	LOC110722241	--	K09264 MADS-box transcription factor, plant | (RefSeq) truncated transcription factor CAULIFLOWER A-like (A)	--	truncated transcription factor CAULIFLOWER A-like [Chenopodium quinoa]	RecName: Full=Agamous-like MADS-box protein AGL8 homolog; AltName: Full=POTM1-1;	SubName: Full=Uncharacterized protein {ECO:0000313|EMBL:KNA22806.1};	MADS box transcription factor	GO:0005634,nucleus; GO:0003700,DNA-binding transcription factor activity; GO:0046983,protein dimerization activity; GO:0000977,RNA polymerase II regulatory region sequence-specific DNA binding; GO:0045944,positive regulation of transcription by RNA polymerase II; GO:0006351,transcription, DNA-templated	PF01486.17:K-box region
gene-LOC110705024	8.86	11.16	6.1	2.32	1.58	2.09	471	565	266	122	78	91	-2.09003	6.53891e-06	0.00167951	down	NW_018744874.1	971141	977669	-	LOC110705024	--	K01897 long-chain acyl-CoA synthetase [EC:6.2.1.3] | (RefSeq) long chain acyl-CoA synthetase 2-like (A)	ko00061: Fatty acid biosynthesis; ko00071: Fatty acid degradation; ko01212: Fatty acid metabolism; ko04146: Peroxisome	long chain acyl-CoA synthetase 2-like [Chenopodium quinoa]	RecName: Full=Long chain acyl-CoA synthetase 2; EC=6.2.1.3; AltName: Full=Protein Botrytis resistant 1; AltName: Full=Protein LATERAL ROOT DEVELOPMENT 2;	SubName: Full=Uncharacterized protein {ECO:0000313|EMBL:KNA25851.1};	Long-chain acyl-CoA synthetases (AMP-forming)	GO:0005783,endoplasmic reticulum; GO:0009506,plasmodesma; GO:0005524,ATP binding; GO:0102391,decanoate-CoA ligase activity; GO:0004467,long-chain fatty acid-CoA ligase activity; GO:0031957,very long-chain fatty acid-CoA ligase activity; GO:0010143,cutin biosynthetic process; GO:0050832,defense response to fungus; GO:0006631,fatty acid metabolic process; GO:0010311,lateral root formation	PF00501.28:AMP-binding enzyme
gene-LOC110730900	34.9	31.64	27.92	86.39	114.3	235.6	738	637	484	1804	2250	4082	2.23685	6.76337e-06	0.00172349	up	NW_018742205.1	6538155	6543043	+	LOC110730900	--	K12382 saposin | (RefSeq) proactivator polypeptide-like 1 (A)	ko00600: Sphingolipid metabolism	proactivator polypeptide-like 1 [Chenopodium quinoa]	--	SubName: Full=Uncharacterized protein {ECO:0000313|EMBL:KNA20690.1};	Prosaposin	GO:0006629,lipid metabolic process	PF05184.15:Saposin-like type B, region 1
gene-LOC110683192	115.98	91.43	76.18	186.76	461.95	442.82	5607	4209	3019	8916	20790	17541	1.94991	7.33611e-06	0.00185483	up	NW_018743623.1	917060	920347	-	LOC110683192	--	--	--	cylicin-2-like [Chenopodium quinoa]	--	SubName: Full=Uncharacterized protein {ECO:0000313|EMBL:KNA06937.1};	--	--	--
gene-LOC110682387	3.71	3.92	2.91	0.66	0.85	0.49	177	178	114	31	38	19	-2.39181	7.70356e-06	0.00193264	down	NW_018743574.1	6791317	6793635	-	LOC110682387	--	--	--	CAR1 transcription factor-like [Chenopodium quinoa]	--	SubName: Full=Uncharacterized protein {ECO:0000313|EMBL:KNA15231.1};	--	--	--
gene-LOC110702966	22.58	21.19	13.44	41.28	75.5	61.12	836	747	408	1509	2602	1854	1.64531	8.00603e-06	0.00199307	up	NW_018744704.1	6187604	6192035	+	LOC110702966	--	K03327 multidrug resistance protein, MATE family | (RefSeq) protein DETOXIFICATION 16-like (A)	--	protein DETOXIFICATION 16-like [Chenopodium quinoa]	RecName: Full=Protein DETOXIFICATION 16 {ECO:0000303|PubMed:11739388}; Short=AtDTX16 {ECO:0000303|PubMed:11739388}; AltName: Full=Multidrug and toxic compound extrusion protein 16 {ECO:0000305}; Short=MATE protein 16 {ECO:0000305};	RecName: Full=Protein DETOXIFICATION {ECO:0000256|RuleBase:RU004914}; AltName: Full=Multidrug and toxic compound extrusion protein {ECO:0000256|RuleBase:RU004914};	Uncharacterized membrane protein, predicted efflux pump	GO:0016021,integral component of membrane; GO:0005774,vacuolar membrane; GO:0015297,antiporter activity; GO:0015238,drug transmembrane transporter activity; GO:0006855,drug transmembrane transport; GO:0009624,response to nematode	PF01554.18:MatE
gene-LOC110695416	27.65	31.56	13.8	63.26	115.25	107.06	714	776	292	1613	2770	2265	1.98582	9.14011e-06	0.00224724	up	NW_018744297.1	1305704	1307436	-	LOC110695416	--	K09872 aquaporin PIP | (RefSeq) aquaporin PIP2-2-like (A)	--	aquaporin PIP2-2-like [Chenopodium quinoa]	RecName: Full=Aquaporin PIP2-7; AltName: Full=Plasma membrane intrinsic protein 2-7; AltName: Full=ZmPIP2-7; AltName: Full=ZmPIP2;7;	SubName: Full=Uncharacterized protein {ECO:0000313|EMBL:KNA10168.1};	Aquaporin (major intrinsic protein family)	GO:0016021,integral component of membrane; GO:0005886,plasma membrane; GO:0015250,water channel activity	PF00230.20:Major intrinsic protein
gene-LOC110720450	6.17	5.06	3.76	0.62	0.37	0.95	270	211	135	27	15	34	-2.91003	9.16589e-06	0.00224724	down	NW_018742556.1	1519592	1524058	+	LOC110720450	--	K15404 aldehyde decarbonylase [EC:4.1.99.5] | (RefSeq) protein ECERIFERUM 1-like (A)	ko00073: Cutin, suberine and wax biosynthesis	protein ECERIFERUM 1-like [Chenopodium quinoa]	RecName: Full=Protein ECERIFERUM 1;	SubName: Full=Uncharacterized protein {ECO:0000313|EMBL:KNA09075.1};	--	GO:0005789,endoplasmic reticulum membrane; GO:0016021,integral component of membrane; GO:0005506,iron ion binding; GO:0016491,oxidoreductase activity; GO:0043447,alkane biosynthetic process; GO:0042742,defense response to bacterium; GO:0050832,defense response to fungus; GO:0008610,lipid biosynthetic process; GO:0006629,lipid metabolic process; GO:0009414,response to water deprivation; GO:0010025…	PF12076.8:WAX2 C-terminal domain
gene-LOC110729060	10.41	12.05	6.39	2.65	2.05	1.74	409	451	206	103	75	56	-2.13412	9.39489e-06	0.00228288	down	NW_018742969.1	249876	253397	-	LOC110729060	--	K12355 coniferyl-aldehyde dehydrogenase [EC:1.2.1.68] | (RefSeq) aldehyde dehydrogenase family 2 member C4-like (A)	ko00940: Phenylpropanoid biosynthesis	aldehyde dehydrogenase family 2 member C4-like [Chenopodium quinoa]	RecName: Full=Aldehyde dehydrogenase family 2 member C4; EC=1.2.1.3; AltName: Full=ALDH1a; AltName: Full=Protein REDUCED EPIDERMAL FLUORESCENCE 1;	SubName: Full=Uncharacterized protein {ECO:0000313|EMBL:KNA16811.1}; Flags: Fragment;	Aldehyde dehydrogenase	GO:0005829,cytosol; GO:0004029,aldehyde dehydrogenase (NAD) activity; GO:0050269,coniferyl-aldehyde dehydrogenase activity; GO:0009699,phenylpropanoid biosynthetic process	PF00171.22:Aldehyde dehydrogenase family
gene-LOC110702668	2.16	2.75	1.97	6.81	7.99	8.3	84	102	63	262	290	265	1.7627	9.45234e-06	0.00228288	up	NW_018744693.1	5993894	6000644	-	LOC110702668	--	--	--	la-related protein CG11505-like [Chenopodium quinoa]	RecName: Full=Protein SRC2 homolog {ECO:0000305}; Short=AtSRC2 {ECO:0000303|PubMed:16227454};	SubName: Full=Uncharacterized protein {ECO:0000313|EMBL:KNA16743.1};	--	GO:0005783,endoplasmic reticulum; GO:0005789,endoplasmic reticulum membrane; GO:0016021,integral component of membrane; GO:0005886,plasma membrane; GO:0000326,protein storage vacuole; GO:0032586,protein storage vacuole membrane; GO:0006623,protein targeting to vacuole	PF00168.30:C2 domain
gene-LOC110700583	1.37	2.03	5.23	0.04	0	0	39	55	122	1	0	0	-7.72368	9.7668e-06	0.00234136	down	NW_018744626.1	4069645	4071319	-	LOC110700583	--	K00799 glutathione S-transferase [EC:2.5.1.18] | (RefSeq) glutathione S-transferase U9-like (A)	ko00480: Glutathione metabolism	glutathione S-transferase U9-like [Chenopodium quinoa]	RecName: Full=Glutathione S-transferase U9; Short=AtGSTU9; EC=2.5.1.18; AltName: Full=GST class-tau member 9; AltName: Full=Glutathione S-transferase 14;	SubName: Full=Uncharacterized protein {ECO:0000313|EMBL:KNA14800.1};	Glutathione S-transferase	GO:0005737,cytoplasm; GO:0005829,cytosol; GO:0004364,glutathione transferase activity; GO:0006749,glutathione metabolic process; GO:0009407,toxin catabolic process	PF13417.6:Glutathione S-transferase, N-terminal domain
gene-LOC110686932	7.08	7.17	3.99	18.81	19.59	27.19	247	238	114	648	636	777	1.87773	1.0195e-05	0.00242602	up	NW_018743906.1	1039904	1045950	-	LOC110686932	--	K00451 homogentisate 1,2-dioxygenase [EC:1.13.11.5] | (RefSeq) homogentisate 1,2-dioxygenase-like (A)	ko00350: Tyrosine metabolism	homogentisate 1,2-dioxygenase-like [Chenopodium quinoa]	RecName: Full=Homogentisate 1,2-dioxygenase; EC=1.13.11.5; AltName: Full=Homogentisate oxygenase; AltName: Full=Homogentisic acid oxidase; AltName: Full=Homogentisicase;	SubName: Full=Uncharacterized protein {ECO:0000313|EMBL:KNA10783.1};	Homogentisate 1,2-dioxygenase	GO:0005829,cytosol; GO:0004411,homogentisate 1,2-dioxygenase activity; GO:0046872,metal ion binding; GO:1902000,homogentisate catabolic process; GO:0006559,L-phenylalanine catabolic process; GO:0006572,tyrosine catabolic process	PF04209.13:homogentisate 1,2-dioxygenase
gene-LOC110682075	20.53	20.33	13.78	3.96	6.24	5.71	509	480	280	97	144	116	-1.76854	1.03305e-05	0.00244033	down	NW_018743574.1	3301966	3305647	-	LOC110682075	--	K10703 very-long-chain (3R)-3-hydroxyacyl-CoA dehydratase [EC:4.2.1.134] | (RefSeq) very-long-chain (3R)-3-hydroxyacyl-CoA dehydratase PASTICCINO 2-like (A)	ko00062: Fatty acid elongation; ko01040: Biosynthesis of unsaturated fatty acids; ko01212: Fatty acid metabolism	very-long-chain (3R)-3-hydroxyacyl-CoA dehydratase PASTICCINO 2-like [Chenopodium quinoa]	RecName: Full=Very-long-chain (3R)-3-hydroxyacyl-CoA dehydratase PASTICCINO 2 {ECO:0000305}; EC=4.2.1.134 {ECO:0000305|PubMed:18799749}; AltName: Full=3-hydroxyacyl-CoA dehydratase PASTICCINO 2; Short=AtPAS2; Short=HACD; Short=HCD; AltName: Full=Protein PEPINO; Short=PEP; AltName: Full=Protein tyrosine phosphatase-like protein;	RecName: Full=Very-long-chain (3R)-3-hydroxyacyl-CoA dehydratase {ECO:0000256|RuleBase:RU363109}; EC=4.2.1.134 {ECO:0000256|RuleBase:RU363109}; Flags: Fragment;	Protein tyrosine phosphatase-like protein PTPLA (contains Pro instead of catalytic Arg)	GO:0030176,integral component of endoplasmic reticulum membrane; GO:0005634,nucleus; GO:0102343,3-hydroxy-arachidoyl-CoA dehydratase activity; GO:0102344,3-hydroxy-behenoyl-CoA dehydratase activity; GO:0102345,3-hydroxy-lignoceroyl-CoA dehydratase activity; GO:0018812,3-hydroxyacyl-CoA dehydratase activity; GO:0102158,very-long-chain 3-hydroxyacyl-CoA dehydratase activity; GO:0030497,fatty acid e…	PF04387.14:Protein tyrosine phosphatase-like protein, PTPLA
gene-LOC110698649	18.64	17.72	20.78	38.79	48.2	46.05	454	411	415	933	1093	919	1.22302	1.07004e-05	0.0025094	up	NW_018744537.1	2641302	2644140	-	LOC110698649	--	--	--	uncharacterized protein LOC110698649 [Chenopodium quinoa]	--	SubName: Full=Uncharacterized protein {ECO:0000313|EMBL:KNA20899.1};	--	--	--
gene-LOC110699283	14.09	12.34	11.6	24.18	35.75	28.24	517	431	349	876	1221	849	1.21626	1.09154e-05	0.00251563	up	NW_018744582.1	1849463	1854978	-	LOC110699283	--	K15731 carboxy-terminal domain RNA polymerase II polypeptide A small phosphatase [EC:3.1.3.16] | (RefSeq) CTD nuclear envelope phosphatase 1 homolog (A)	--	CTD nuclear envelope phosphatase 1 homolog [Chenopodium quinoa]	RecName: Full=Mitochondrial import inner membrane translocase subunit TIM50; AltName: Full=NIF domain protein 3; Flags: Precursor;	SubName: Full=Uncharacterized protein {ECO:0000313|EMBL:KNA19645.1};	TFIIF-interacting CTD phosphatase, including NLI-interacting factor (involved in RNA polymerase II regulation)	GO:0016021,integral component of membrane; GO:0005744,TIM23 mitochondrial import inner membrane translocase complex; GO:0015031,protein transport	PF03031.18:NLI interacting factor-like phosphatase
gene-LOC110733002	9.78	8.9	7.62	3.24	3.34	2.94	434	376	277	142	138	107	-1.45071	1.09231e-05	0.00251563	down	NW_018743196.1	830156	836043	-	LOC110733002	--	K00648 3-oxoacyl-[acyl-carrier-protein] synthase III [EC:2.3.1.180] | (RefSeq) 3-oxoacyl-[acyl-carrier-protein] synthase III, chloroplastic-like (A)	ko00061: Fatty acid biosynthesis; ko01212: Fatty acid metabolism	3-oxoacyl-[acyl-carrier-protein]	RecName: Full=3-oxoacyl-[acyl-carrier-protein] synthase III, chloroplastic; EC=2.3.1.180; AltName: Full=Beta-ketoacyl-ACP synthase III; Short=KAS III; Flags: Precursor;	SubName: Full=Uncharacterized protein {ECO:0000313|EMBL:KNA16669.1};	--	GO:0009507,chloroplast; GO:0004315,3-oxoacyl-[acyl-carrier-protein] synthase activity; GO:0033818,beta-ketoacyl-acyl-carrier-protein synthase III activity; GO:0006633,fatty acid biosynthetic process	PF08541.10:3-Oxoacyl-[acyl-carrier-protein (ACP)] synthase III C terminal
gene-LOC110705705	42.08	43.17	45.04	89.66	101.7	131.09	1077	1052	945	2266	2423	2749	1.32091	1.09602e-05	0.00251563	up	NW_018744878.1	5049645	5052181	+	LOC110705705	--	--	--	uncharacterized protein LOC110705705 [Chenopodium quinoa]	--	SubName: Full=Uncharacterized protein {ECO:0000313|EMBL:EYU27027.1};	--	GO:0016021,integral component of membrane	PF03350.16:Uncharacterized protein family, UPF0114
gene-LOC110683568	5.82	4.59	2.36	12.68	19.53	22.09	361	271	120	777	1128	1123	2.11442	1.12749e-05	0.00254211	up	NW_018743669.1	2239688	2244093	-	LOC110683568	--	--	--	BEL1-like homeodomain protein 1 [Chenopodium quinoa]	RecName: Full=BEL1-like homeodomain protein 1; Short=BEL1-like protein 1; AltName: Full=Protein EMBRYO SAC DEVELOPMENT ARREST 29;	SubName: Full=Uncharacterized protein {ECO:0000313|EMBL:KNA25228.1};	Transcription factor MEIS1 and related HOX domain proteins	GO:0005737,cytoplasm; GO:0005634,nucleus; GO:0003677,DNA binding; GO:0003700,DNA-binding transcription factor activity; GO:0046982,protein heterodimerization activity; GO:0042803,protein homodimerization activity; GO:0010197,polar nucleus fusion; GO:0009737,response to abscisic acid; GO:0010201,response to continuous far red light stimulus by the high-irradiance response system; GO:0009610,respon…	PF07526.11:Associated with HOX
gene-LOC110722661	10.23	10.39	7.34	19.07	26.89	25.02	435	421	256	801	1065	872	1.35646	1.13218e-05	0.00254211	up	NW_018742204.1	20768890	20776561	+	LOC110722661	--	K09597 signal peptide peptidase-like 2B [EC:3.4.23.-] | (RefSeq) signal peptide peptidase-like 2 isoform X1 (A)	--	signal peptide peptidase-like 2 isoform X1 [Chenopodium quinoa]	RecName: Full=Signal peptide peptidase-like 2; Short=AtSPPL2; EC=3.4.23.-; Flags: Precursor;	SubName: Full=signal peptide peptidase-like 2 {ECO:0000313|RefSeq:XP_016755743.1};	Uncharacterized conserved protein, contains PA domain	GO:0005768,endosome; GO:0010008,endosome membrane; GO:0030660,Golgi-associated vesicle membrane; GO:0071458,integral component of cytoplasmic side of endoplasmic reticulum membrane; GO:0071556,integral component of lumenal side of endoplasmic reticulum membrane; GO:0005765,lysosomal membrane; GO:0004190,aspartic-type endopeptidase activity	PF04258.13:Signal peptide peptidase
gene-LOC110700174	83.95	77.96	38.38	264.81	183.78	342.58	1796	1588	673	5594	3660	6005	2.02915	1.13281e-05	0.00254211	up	NW_018744620.1	1971264	1972302	-	LOC110700174	--	--	--	fasciclin-like arabinogalactan protein 9 [Chenopodium quinoa]	RecName: Full=Fasciclin-like arabinogalactan protein 9; Flags: Precursor;	SubName: Full=Uncharacterized protein {ECO:0000313|EMBL:KNA15304.1};	--	GO:0031225,anchored component of membrane; GO:0046658,anchored component of plasma membrane; GO:0005886,plasma membrane	PF02469.22:Fasciclin domain
gene-LOC110687453	84.88	90.5	72.38	147.62	264.83	227.29	1309	1329	915	2248	3802	2872	1.37202	1.13897e-05	0.00254211	up	NW_018743919.1	3909322	3910070	+	LOC110687453	--	--	--	cysteine proteinase inhibitor 1-like [Chenopodium quinoa]	RecName: Full=Cysteine proteinase inhibitor 1 {ECO:0000303|PubMed:14697268}; Short=KCPI1 {ECO:0000303|PubMed:14697268}; AltName: Full=Phytocystatin {ECO:0000312|EMBL:AAR92223.1}; AltName: Allergen=Act d 4; Flags: Precursor;	RecName: Full=Cysteine proteinase inhibitor {ECO:0000256|RuleBase:RU362130};	--	GO:0005576,extracellular region; GO:0004869,cysteine-type endopeptidase inhibitor activity; GO:0006952,defense response	PF16845.5:Aspartic acid proteinase inhibitor
gene-LOC110715058	9.91	8.4	3.54	1.45	1.23	1.04	512	413	150	74	59	44	-2.52099	1.26305e-05	0.00279974	down	NW_018745470.1	1033541	1038817	+	LOC110715058	--	--	--	protein CHUP1, chloroplastic-like [Chenopodium quinoa]	RecName: Full=Protein CHUP1, chloroplastic; AltName: Full=Protein CHLOROPLAST UNUSUAL POSITIONING 1;	SubName: Full=Uncharacterized protein {ECO:0000313|EMBL:KNA07824.1};	--	GO:0009507,chloroplast; GO:0009707,chloroplast outer membrane; GO:0009902,chloroplast relocation	--
gene-LOC110723949	0.04	0	0	0.76	4.84	3.62	1	0	0	21	126	83	7.76827	1.28542e-05	0.00282992	up	NW_018742733.1	4142858	4145064	+	LOC110723949	--	--	--	glycine-rich protein DOT1-like [Chenopodium quinoa]	--	--	--	--	PF07172.11:Glycine rich protein family
gene-LOC110737847	1.67	0.79	2.27	7.68	11.63	14.85	51	23	57	232	331	372	2.84821	1.31349e-05	0.00285194	up	NW_018743331.1	6719951	6724854	+	LOC110737847	--	K23877 xyloglucan O-acetyltransferase | (RefSeq) protein ALTERED XYLOGLUCAN 4-like isoform X1 (A)	--	protein trichome birefringence-like 41 [Chenopodium quinoa]	RecName: Full=Protein trichome birefringence-like 41;	SubName: Full=Uncharacterized protein {ECO:0000313|EnsemblPlants:GSMUA_Achr3P32120_001};	--	GO:0005794,Golgi apparatus; GO:0016021,integral component of membrane; GO:0016413,O-acetyltransferase activity; GO:0071554,cell wall organization or biogenesis	PF13839.6:GDSL/SGNH-like Acyl-Esterase family found in Pmr5 and Cas1p
gene-LOC110725727	8.02	7.96	7.72	18.57	16.72	15.19	619	585	488	1415	1201	960	1.10405	1.32273e-05	0.00285194	up	NW_018742815.1	2445611	2462784	-	LOC110725727	--	K00858 NAD+ kinase [EC:2.7.1.23] | (RefSeq) NAD kinase 2, chloroplastic-like (A)	ko00760: Nicotinate and nicotinamide metabolism	NAD kinase 2, chloroplastic-like [Chenopodium quinoa]	RecName: Full=NAD kinase 2, chloroplastic; Short=AtNADK-2; EC=2.7.1.23; Flags: Precursor;	SubName: Full=Uncharacterized protein {ECO:0000313|EMBL:KNA12689.1};	Predicted sugar kinase	GO:0009507,chloroplast; GO:0005524,ATP binding; GO:0005516,calmodulin binding; GO:0003951,NAD+ kinase activity; GO:0019674,NAD metabolic process; GO:0006741,NADP biosynthetic process	PF01513.21:ATP-NAD kinase
gene-LOC110724431	26.8	29.05	34.29	63.86	79.13	96.86	1128	1164	1183	2654	3100	3340	1.4187	1.32844e-05	0.00285194	up	NW_018742763.1	6310752	6317371	-	LOC110724431	--	K08145 MFS transporter, SP family, solute carrier family 2 (facilitated glucose transporter), member 8 | (RefSeq) sugar transporter ERD6-like 6 isoform X1 (A)	--	sugar transporter ERD6-like 6 isoform X1 [Chenopodium quinoa]	RecName: Full=Sugar transporter ERD6-like 6;	SubName: Full=Uncharacterized protein {ECO:0000313|EMBL:KNA12018.1};	Predicted transporter (major facilitator superfamily)	GO:0005794,Golgi apparatus; GO:0016021,integral component of membrane; GO:0009705,plant-type vacuole membrane; GO:0005774,vacuolar membrane; GO:0005355,glucose transmembrane transporter activity; GO:0005351,carbohydrate:proton symporter activity; GO:0042593,glucose homeostasis; GO:0046323,glucose import; GO:0035428,NA; GO:0010030,positive regulation of seed germination	PF00083.24:Sugar (and other) transporter
gene-LOC110723040	81.92	80.05	75.99	9.07	26.76	22.99	3522	3277	2678	385	1071	810	-2.02302	1.33067e-05	0.00285194	down	NW_018742720.1	456074	459171	-	LOC110723040	--	K15397 3-ketoacyl-CoA synthase [EC:2.3.1.199] | (RefSeq) 3-ketoacyl-CoA synthase 10-like (A)	ko00062: Fatty acid elongation; ko04626: Plant-pathogen interaction	3-ketoacyl-CoA synthase 10-like [Chenopodium quinoa]	RecName: Full=3-ketoacyl-CoA synthase 10 {ECO:0000303|PubMed:18465198}; Short=KCS-10 {ECO:0000303|PubMed:18465198}; EC=2.3.1.199 {ECO:0000305}; AltName: Full=Protein FIDDLEHEAD {ECO:0000303|PubMed:10559443}; AltName: Full=Very long-chain fatty acid condensing enzyme 10 {ECO:0000303|PubMed:18465198}; Short=VLCFA condensing enzyme 10 {ECO:0000303|PubMed:18465198};	RecName: Full=3-ketoacyl-CoA synthase {ECO:0000256|PIRNR:PIRNR036417}; EC=2.3.1.- {ECO:0000256|PIRNR:PIRNR036417};	--	GO:0005783,endoplasmic reticulum; GO:0005789,endoplasmic reticulum membrane; GO:0016021,integral component of membrane; GO:0016020,membrane; GO:0102336,3-oxo-arachidoyl-CoA synthase activity; GO:0102337,3-oxo-cerotoyl-CoA synthase activity; GO:0102338,3-oxo-lignoceronyl-CoA synthase activity; GO:0102756,very-long-chain 3-ketoacyl-CoA synthase activity; GO:0006633,fatty acid biosynthetic process; …	PF08392.12:FAE1/Type III polyketide synthase-like protein
gene-LOC110695930	7.68	7.33	9.24	19.26	24.59	27.94	232	211	229	575	692	692	1.57134	1.39533e-05	0.00295489	up	NW_018744311.1	505353	508660	-	LOC110695930	--	--	--	metal tolerance protein 4-like [Chenopodium quinoa]	RecName: Full=Metal tolerance protein 4; Short=OsMTP4;	SubName: Full=Uncharacterized protein {ECO:0000313|EMBL:KNA14900.1};	Mitochondrial Fe2+ transporter MMT1 and related transporters (cation diffusion facilitator superfamily)	GO:0016021,integral component of membrane; GO:0005774,vacuolar membrane; GO:0008324,cation transmembrane transporter activity	PF01545.21:Cation efflux family
gene-LOC110699048	9.36	9.29	4.91	1.72	1.54	1.75	326	308	140	59	50	50	-2.20277	1.39696e-05	0.00295489	down	NW_018744560.1	945447	947137	+	LOC110699048	--	--	--	uncharacterized protein LOC110699048 [Chenopodium quinoa]	--	SubName: Full=Uncharacterized protein {ECO:0000313|EMBL:KNA17610.1};	--	--	PF03087.14:Arabidopsis protein of unknown function
gene-LOC110728722	1.43	1.26	1.15	0.24	0.2	0.19	129	108	85	21	17	14	-2.59381	1.45923e-05	0.00306656	down	NW_018742959.1	231633	238810	-	LOC110728722	--	K17545 serine/threonine-protein kinase ULK4 [EC:2.7.11.1] | (RefSeq) serine/threonine-protein kinase RUNKEL-like (A)	--	serine/threonine-protein kinase RUNKEL-like [Chenopodium quinoa]	RecName: Full=Serine/threonine-protein kinase RUNKEL {ECO:0000305}; AltName: Full=Protein EMBRYO DEFECTIVE 3013 {ECO:0000305}; AltName: Full=Protein RUNKEL {ECO:0000303|PubMed:11089872}; EC=2.7.11.1 {ECO:0000305};	SubName: Full=Uncharacterized protein {ECO:0000313|EMBL:KNA20749.1};	Serine-threonine protein kinase FUSED	GO:0005874,microtubule; GO:0009524,phragmoplast; GO:0009506,plasmodesma; GO:0009574,preprophase band; GO:0005819,spindle; GO:0005524,ATP binding; GO:0008017,microtubule binding; GO:0016740,transferase activity; GO:0007349,cellularization; GO:0000911,cytokinesis by cell plate formation; GO:0010342,endosperm cellularization; GO:0009556,microsporogenesis; GO:0000914,phragmoplast assembly; GO:0009555…	PF00069.25:Protein kinase domain
gene-LOC110695268	0.56	0.07	0	2.79	11.07	40.58	8	1	0	39	146	471	6.46101	1.49015e-05	0.00311133	up	NW_018744290.1	2450311	2451721	-	LOC110695268	--	--	--	uncharacterized protein LOC110695268 [Chenopodium quinoa]	--	SubName: Full=Uncharacterized protein {ECO:0000313|EMBL:KNA16242.1};	--	--	--
novel.6582	40.7957	41.458	17.3443	8.78613	8.922	11.5051	8588	8263	3709	1885	1971	2282	-1.64569	1.50113e-05	0.00311416	down	NW_018744718.1	2514010	2516340	-	--	--	--	--	Poly [ADP-ribose]	--	SubName: Full=Uncharacterized protein {ECO:0000313|EnsemblPlants:GSMUA_Achr3P10490_001};	--	--	--
novel.6967	0	0	0	0.272373	1.59842	6.89659	0	0	0	10	61	235	9.27995	1.54186e-05	0.0031783	up	NW_018744895.1	2492469	2492863	.	--	--	--	--	--	--	--	--	--	--
gene-LOC110693605	10.7	9.69	6.57	19.33	31.37	25.95	473	408	238	844	1291	940	1.51739	1.57801e-05	0.00323222	up	NW_018744151.1	3020552	3031862	+	LOC110693605	--	K01466 allantoinase [EC:3.5.2.5] | (RefSeq) allantoinase-like isoform X1 (A)	ko00230: Purine metabolism	allantoinase-like isoform X2 [Chenopodium quinoa]	RecName: Full=Allantoinase; Short=AtALN; EC=3.5.2.5;	SubName: Full=Uncharacterized protein {ECO:0000313|EMBL:KNA14579.1};	Dihydroorotase and related enzymes	GO:0005783,endoplasmic reticulum; GO:0004038,allantoinase activity; GO:0050897,cobalt ion binding; GO:0008270,zinc ion binding; GO:0000256,allantoin catabolic process; GO:0006995,cellular response to nitrogen starvation; GO:0006145,purine nucleobase catabolic process; GO:0010136,ureide catabolic process	PF01979.20:Amidohydrolase family
gene-LOC110731708	5.04	5.75	3.07	12.11	15.8	16.11	244	265	122	579	712	639	1.68719	1.62091e-05	0.00329921	up	NW_018743074.1	2313714	2316064	+	LOC110731708	--	K08900 mitochondrial chaperone BCS1 | (RefSeq) AAA-ATPase At2g46620-like (A)	--	AAA-ATPase At2g46620-like [Chenopodium quinoa]	RecName: Full=AAA-ATPase At2g46620; EC=3.6.1.3 {ECO:0000250|UniProtKB:Q9FLD5};	SubName: Full=Uncharacterized protein {ECO:0000313|EMBL:KNA25601.1};	AAA+-type ATPase	GO:0016021,integral component of membrane; GO:0005524,ATP binding; GO:0016887,ATPase activity	PF00004.29:ATPase family associated with various cellular activities (AAA)
gene-LOC110707640	17.3	17.52	66.51	4.08	0.85	1.52	305	294	961	71	14	22	-3.9677	1.68608e-05	0.00341041	down	NW_018745003.1	2808135	2809403	-	LOC110707640	--	--	--	zinc finger Ran-binding domain-containing protein 2-like [Chenopodium quinoa]	RecName: Full=Zinc finger protein VAR3, chloroplastic {ECO:0000305}; AltName: Full=Organelle Zinc finger 1 {ECO:0000303|PubMed:25768119}; AltName: Full=Protein VARIEGATED 3 {ECO:0000303|PubMed:15340011}; Flags: Precursor;	SubName: Full=Uncharacterized protein {ECO:0000313|EMBL:KNA15812.1};	RNA-binding Ran Zn-finger protein and related proteins	GO:0009507,chloroplast; GO:0009570,chloroplast stroma; GO:0046872,metal ion binding; GO:1900871,chloroplast mRNA modification; GO:0009658,chloroplast organization; GO:0006397,mRNA processing	PF00641.18:Zn-finger in Ran binding protein and others
gene-LOC110690041	13.26	13.49	11.36	35.18	41.74	22.51	981	950	689	2569	2874	1364	1.38463	1.71365e-05	0.00343173	up	NW_018743979.1	4182449	4219617	+	LOC110690041	--	K01006 pyruvate, orthophosphate dikinase [EC:2.7.9.1] | (RefSeq) pyruvate, phosphate dikinase, chloroplastic-like (A)	ko00010: Glycolysis / Gluconeogenesis; ko00620: Pyruvate metabolism; ko00710: Carbon fixation in photosynthetic organisms; ko01200: Carbon metabolism	pyruvate, phosphate dikinase, chloroplastic-like [Chenopodium quinoa]	RecName: Full=Pyruvate, phosphate dikinase, chloroplastic; EC=2.7.9.1 {ECO:0000250|UniProtKB:P11155}; AltName: Full=Pyruvate, orthophosphate dikinase; Flags: Precursor;	RecName: Full=Pyruvate, phosphate dikinase {ECO:0000256|PIRNR:PIRNR000853}; EC=2.7.9.1 {ECO:0000256|PIRNR:PIRNR000853};	--	GO:0009507,chloroplast; GO:0005524,ATP binding; GO:0016301,kinase activity; GO:0046872,metal ion binding; GO:0050242,pyruvate, phosphate dikinase activity; GO:0015979,photosynthesis; GO:0006090,pyruvate metabolic process	PF02896.18:PEP-utilising enzyme, TIM barrel domain
gene-LOC110737666	160.79	168.14	181.82	293.19	432.66	337.03	5628	5604	5217	10134	14098	9666	1.05381	1.72297e-05	0.00343173	up	NW_018743331.1	658313	660295	-	LOC110737666	--	--	--	early nodulin-like protein 2 [Chenopodium quinoa]	RecName: Full=Early nodulin-like protein 2; AltName: Full=Phytocyanin-like protein; Flags: Precursor;	SubName: Full=Uncharacterized protein {ECO:0000313|EMBL:KNA06148.1};	--	GO:0031225,anchored component of membrane; GO:0046658,anchored component of plasma membrane; GO:0048046,apoplast; GO:0009507,chloroplast; GO:0005886,plasma membrane; GO:0005773,vacuole; GO:0009055,electron transfer activity	PF02298.17:Plastocyanin-like domain
novel.3233	19.2742	17.6668	13.5685	4.34016	3.62645	1.00575	1645	1427	1176	378	325	81	-2.46223	1.72843e-05	0.00343173	down	NW_018743285.1	3232387	3233321	.	--	--	--	--	--	--	--	--	--	--
novel.7764	0	0.012779	0	0.30156	0.538397	3.261	0	1	0	22	40	217	8.1912	1.89451e-05	0.00373854	up	NW_018745275.1	25935	26707	.	--	--	K14677 aminoacylase [EC:3.5.1.14] | (RefSeq) uncharacterized protein LOC107892630 (A)	ko00220: Arginine biosynthesis; ko01210: 2-Oxocarboxylic acid metabolism; ko01230: Biosynthesis of amino acids	uncharacterized protein LOC110684459 [Chenopodium quinoa]	--	SubName: Full=Uncharacterized protein {ECO:0000313|EMBL:CCA66036.1};	FOG: Reverse transcriptase	GO:0003676,nucleic acid binding	--
gene-LOC110691925	66.58	75.92	5.78	1.39	1.37	0	2037	2212	145	42	39	0	-5.7235	2.03358e-05	0.00398865	down	NW_018744092.1	3968450	3971418	+	LOC110691925	--	--	--	protodermal factor 1-like [Chenopodium quinoa]	RecName: Full=Protodermal factor 1; Flags: Precursor;	SubName: Full=Uncharacterized protein {ECO:0000313|EMBL:KMS94996.1};	--	GO:0005576,extracellular region	--
gene-LOC110685573	3.28	4.17	4.65	9.75	20.43	23.53	137	166	159	402	794	805	2.14844	2.05297e-05	0.00400243	up	NW_018743828.1	1714976	1718833	+	LOC110685573	--	K14209 solute carrier family 36 (proton-coupled amino acid transporter) | (RefSeq) amino acid transporter AVT3C-like (A)	--	amino acid permease 3-like [Chenopodium quinoa]	RecName: Full=Amino acid permease 3; AltName: Full=Amino acid transporter AAP3;	SubName: Full=Uncharacterized protein {ECO:0000313|EMBL:KNA08084.1};	Amino acid transporters	GO:0016021,integral component of membrane; GO:0031965,nuclear membrane; GO:0005886,plasma membrane; GO:0015171,amino acid transmembrane transporter activity; GO:0015293,symporter activity; GO:0003333,amino acid transmembrane transport; GO:0015802,basic amino acid transport	PF01490.18:Transmembrane amino acid transporter protein
gene-LOC110713890	1.81	1.84	0.92	4.74	10.6	5.49	172	166	72	445	937	427	2.1852	2.11437e-05	0.00409745	up	NW_018745454.1	5108618	5120079	-	LOC110713890	--	K05643 ATP-binding cassette, subfamily A (ABC1), member 3 | (RefSeq) ABC transporter A family member 1-like isoform X1 (A)	ko02010: ABC transporters	ABC transporter G family member 34-like isoform X1 [Chenopodium quinoa]	RecName: Full=ABC transporter G family member 34; Short=ABC transporter ABCG.34; Short=AtABCG34; AltName: Full=Pleiotropic drug resistance protein 6;	SubName: Full=pleiotropic drug resistance protein 2 {ECO:0000313|RefSeq:XP_018839779.1};	Pleiotropic drug resistance proteins (PDR1-15), ABC superfamily	GO:0016021,integral component of membrane; GO:0005886,plasma membrane; GO:0005524,ATP binding; GO:0042626,ATPase activity, coupled to transmembrane movement of substances	PF01061.24:ABC-2 type transporter
gene-LOC110724805	9.76	12.83	16.7	33.47	56.22	74.14	246	308	345	833	1319	1531	2.05933	2.12782e-05	0.00409896	up	NW_018742770.1	3934394	3935617	+	LOC110724805	--	--	--	--	--	--	--	--	--
gene-LOC110697306	2.21	2.34	1.64	5.98	7.15	11.55	136	137	83	364	410	583	2.02305	2.15981e-05	0.00412443	up	NW_018744460.1	3137354	3151594	-	LOC110697306	--	K21989 calcium permeable stress-gated cation channel | (RefSeq) CSC1-like protein RXW8 isoform X1 (A)	--	CSC1-like protein RXW8 isoform X1 [Chenopodium quinoa]	RecName: Full=CSC1-like protein RXW8;	SubName: Full=Uncharacterized protein {ECO:0000313|EMBL:KNA19393.1};	Uncharacterized conserved protein	GO:0016021,integral component of membrane; GO:0006811,ion transport	PF02714.15:Calcium-dependent channel, 7TM region, putative phosphate
novel.2384	0	0	0	0.308552	0.754566	7.37995	0	0	0	13	31	269	9.34348	2.16653e-05	0.00412443	up	NW_018742963.1	2031717	2032140	.	--	--	--	--	--	--	--	--	--	--
gene-LOC110721028	1.51	2.38	3.49	0.27	0.31	0.15	74	111	140	13	14	6	-3.35969	2.20468e-05	0.00417253	down	NW_018742577.1	3782760	3788254	-	LOC110721028	--	K01051 pectinesterase [EC:3.1.1.11] | (RefSeq) pectinesterase-like (A)	ko00040: Pentose and glucuronate interconversions	pectinesterase-like [Chenopodium quinoa]	RecName: Full=Pectinesterase 2.1; Short=PE 2.1; EC=3.1.1.11; AltName: Full=Pectin methylesterase 2.1; Flags: Precursor;	RecName: Full=Pectinesterase {ECO:0000256|RuleBase:RU000589}; EC=3.1.1.11 {ECO:0000256|RuleBase:RU000589};	--	GO:0071944,cell periphery; GO:0005618,cell wall; GO:0005576,extracellular region; GO:0045330,aspartyl esterase activity; GO:0030599,pectinesterase activity; GO:0046910,pectinesterase inhibitor activity; GO:0042545,cell wall modification; GO:0009835,fruit ripening; GO:0045490,pectin catabolic process	PF01095.19:Pectinesterase
novel.7626	3.31242	2.95545	2.07711	11.7359	9.52728	5.2294	357	302	228	1288	1077	531	1.71736	2.22558e-05	0.00418759	up	NW_018745174.1	2104199	2105378	.	--	--	--	--	hypothetical protein BVRB_3g062350 [Beta vulgaris subsp. vulgaris]	--	--	--	--	--
gene-LOC110698085	7.08	8.31	16.07	0.44	0.23	1.47	229	256	426	14	7	39	-3.85724	2.24223e-05	0.00419452	down	NW_018744502.1	6537456	6539026	+	LOC110698085	--	K17193 anthocyanidin 3-O-glucoside 2'''-O-xylosyltransferase [EC:2.4.2.51] | (RefSeq) anthocyanidin 3-O-glucoside 2'''-O-xylosyltransferase-like (A)	ko00942: Anthocyanin biosynthesis	anthocyanidin 3-O-glucoside 2'''-O-xylosyltransferase-like [Chenopodium quinoa]	RecName: Full=Anthocyanidin 3-O-glucoside 2'''-O-xylosyltransferase; Short=A3G2''XylT; EC=2.4.2.51;	RecName: Full=Glycosyltransferase {ECO:0000256|RuleBase:RU362057}; EC=2.4.1.- {ECO:0000256|RuleBase:RU362057};	UDP-glucuronosyl and UDP-glucosyl transferase	GO:0043231,intracellular membrane-bounded organelle; GO:0102580,cyanidin 3-O-glucoside 2-O''-xylosyltransferase activity; GO:0080043,quercetin 3-O-glucosyltransferase activity; GO:0080044,quercetin 7-O-glucosyltransferase activity; GO:0035252,UDP-xylosyltransferase activity; GO:0009718,anthocyanin-containing compound biosynthetic process; GO:0071368,cellular response to cytokinin stimulus; GO:007…	PF00201.18:UDP-glucoronosyl and UDP-glucosyl transferase
gene-LOC110735675	1.84	1.32	1.67	6.05	12.53	5.79	66	45	49	214	418	170	2.31609	2.29969e-05	0.00427729	up	NW_018743285.1	1515576	1517316	-	LOC110735675	--	K13415 protein brassinosteroid insensitive 1 [EC:2.7.10.1 2.7.11.1] | (RefSeq) systemin receptor SR160-like (A)	ko04075: Plant hormone signal transduction	brassinosteroid LRR receptor kinase BRL1-like [Chenopodium quinoa]	RecName: Full=Leucine-rich repeat receptor protein kinase EMS1 {ECO:0000305}; EC=2.7.11.1; AltName: Full=Protein EXCESS MICROSPOROCYTES 1 {ECO:0000303|PubMed:12154130}; AltName: Full=Protein EXTRA SPOROGENOUS CELLS {ECO:0000303|PubMed:12401166}; Flags: Precursor;	SubName: Full=Uncharacterized protein {ECO:0000313|EMBL:KNA24539.1};	Serine/threonine protein kinase	GO:0016021,integral component of membrane; GO:0016020,membrane; GO:0005886,plasma membrane; GO:0005524,ATP binding; GO:0004674,protein serine/threonine kinase activity; GO:0019199,transmembrane receptor protein kinase activity; GO:0010234,anther wall tapetum cell fate specification; GO:0009556,microsporogenesis; GO:0046777,protein autophosphorylation	PF07714.17:Protein tyrosine kinase
gene-LOC110716339	7.92	5.36	5.32	16.74	16.61	17.59	296	191	163	618	578	539	1.4719	2.36073e-05	0.00436574	up	NW_018745569.1	1493015	1495302	+	LOC110716339	--	K03686 molecular chaperone DnaJ | (RefSeq) chaperone protein dnaJ A7A, chloroplastic-like isoform X1 (A)	--	chaperone protein dnaJ C76, chloroplastic-like [Chenopodium quinoa]	RecName: Full=Chaperone protein dnaJ C76, chloroplastic {ECO:0000305}; Short=atDjC76 {ECO:0000303|PubMed:23894646}; AltName: Full=AtDjC17 {ECO:0000303|PubMed:25339971}; AltName: Full=AtJ17 {ECO:0000305}; Flags: Precursor;	SubName: Full=Uncharacterized protein {ECO:0000313|EMBL:KNA19487.1};	Molecular chaperone (DnaJ superfamily)	GO:0009507,chloroplast	PF00226.31:DnaJ domain
gene-LOC110699470	1.84	2.47	6.31	0.05	0.06	0	36	46	101	1	1	0	-6.62606	2.38662e-05	0.00438852	down	NW_018744582.1	3000064	3001011	-	LOC110699470	--	--	--	uncharacterized protein LOC110699470 [Chenopodium quinoa]	--	SubName: Full=Uncharacterized protein {ECO:0000313|EMBL:KNA23815.1};	--	--	--
gene-LOC110737333	0.45	0.19	0	7.16	7.11	7.1	5	2	0	79	74	65	5.07753	2.44994e-05	0.00447106	up	NW_018743327.1	1674726	1675741	+	LOC110737333	--	--	--	--	--	--	--	--	--
gene-LOC110707876	103.38	82.66	50.27	27.49	25.18	19.55	1588	1209	633	417	360	246	-1.68556	2.45913e-05	0.00447106	down	NW_018745003.1	2561136	2561881	+	LOC110707876	--	--	--	uncharacterized protein LOC110707876 [Chenopodium quinoa]	--	SubName: Full=Uncharacterized protein {ECO:0000313|EMBL:KNA25442.1};	--	--	--
novel.5343	0.077864	0	0	0.626676	1.45028	9.07807	4	0	0	32	77	428	7.35818	2.47945e-05	0.00448282	up	NW_018744167.1	2411798	2412345	.	--	--	--	--	--	--	--	--	--	--
gene-LOC110716518	12.16	13.3	11.34	27.85	67.2	33.75	404	421	309	914	2079	919	1.79019	2.50018e-05	0.00449519	up	NW_018745587.1	230888	232501	-	LOC110716518	--	--	--	uncharacterized protein LOC110716518 [Chenopodium quinoa]	--	SubName: Full=Uncharacterized protein {ECO:0000313|EMBL:KNA04987.1};	--	--	--
gene-LOC110702092	5.67	6.35	7.21	15.86	16.79	15.9	211	225	220	583	582	485	1.34244	2.53391e-05	0.00453066	up	NW_018744662.1	3320629	3322913	-	LOC110702092	--	K03686 molecular chaperone DnaJ | (RefSeq) chaperone protein dnaJ A7A, chloroplastic-like isoform X1 (A)	--	chaperone protein dnaJ C76, chloroplastic-like [Chenopodium quinoa]	RecName: Full=Chaperone protein dnaJ C76, chloroplastic {ECO:0000305}; Short=atDjC76 {ECO:0000303|PubMed:23894646}; AltName: Full=AtDjC17 {ECO:0000303|PubMed:25339971}; AltName: Full=AtJ17 {ECO:0000305}; Flags: Precursor;	SubName: Full=Uncharacterized protein {ECO:0000313|EMBL:KNA19487.1};	Molecular chaperone (DnaJ superfamily)	GO:0009507,chloroplast	PF00226.31:DnaJ domain
gene-LOC110729899	22.63	25.61	21.45	5.39	1.48	1.19	672	724	522	158	41	29	-3.07072	2.56652e-05	0.004554	down	NW_018743014.1	1904642	1907659	-	LOC110729899	--	--	--	GDSL esterase/lipase APG-like [Chenopodium quinoa]	RecName: Full=GDSL esterase/lipase APG; EC=3.1.1.-; AltName: Full=Extracellular lipase APG; Flags: Precursor;	SubName: Full=Uncharacterized protein {ECO:0000313|EMBL:KNA16300.1};	--	GO:0048046,apoplast; GO:0016788,hydrolase activity, acting on ester bonds; GO:0016042,lipid catabolic process	PF00657.22:GDSL-like Lipase/Acylhydrolase
novel.4786	0	0	0	0.71046	0.972697	1.91545	0	0	0	33	46	80	8.25734	2.57866e-05	0.004554	up	NW_018743975.1	217869	218354	.	--	--	--	--	--	--	--	--	--	--
gene-LOC110706940	10.44	11.53	12.4	38.89	45.87	142.53	153	161	149	563	626	1712	2.75679	2.58918e-05	0.004554	up	NW_018744991.1	2485390	2486874	-	LOC110706940	--	--	--	auxin-repressed 12.5 kDa protein-like [Chenopodium quinoa]	RecName: Full=Auxin-repressed 12.5 kDa protein;	SubName: Full=Uncharacterized protein {ECO:0000313|EMBL:KNA05025.1};	--	GO:0009734,auxin-activated signaling pathway	PF05564.12:Dormancy/auxin associated protein
gene-LOC110735312	12.3	8.5	5.83	1.99	2.03	1.74	345	227	134	55	53	40	-2.1868	2.6381e-05	0.00461496	down	NW_018743262.1	3516019	3529660	-	LOC110735312	--	K11153 retinol dehydrogenase 12 [EC:1.1.1.300] | (RefSeq) short-chain dehydrogenase TIC 32, chloroplastic-like (A)	--	short-chain dehydrogenase TIC 32, chloroplastic-like [Chenopodium quinoa]	RecName: Full=Short-chain dehydrogenase TIC 32, chloroplastic; EC=1.1.1.-; AltName: Full=Translocon at the inner envelope membrane of chloroplasts 32; Short=PsTIC32;	SubName: Full=Uncharacterized protein {ECO:0000313|EMBL:KNA09660.1};	Dehydrogenases with different specificities (related to short-chain alcohol dehydrogenases)	GO:0009706,chloroplast inner membrane; GO:0005516,calmodulin binding; GO:0016491,oxidoreductase activity; GO:0015031,protein transport	PF00106.25:short chain dehydrogenase
gene-LOC110738375	30.44	32.84	19.39	9.23	5.09	7.77	1239	1273	647	371	193	259	-1.86294	2.66611e-05	0.00463889	down	NW_018743389.1	700313	705178	-	LOC110738375	--	K22683 aspartyl protease family protein [EC:3.4.23.-] | (RefSeq) aspartyl protease family protein 2-like (A)	--	aspartyl protease AED3-like [Chenopodium quinoa]	RecName: Full=Aspartyl protease AED3 {ECO:0000303|PubMed:24755512}; EC=3.4.23.- {ECO:0000305}; AltName: Full=Apoplastic EDS1-dependent protein 3 {ECO:0000303|PubMed:24755512}; Flags: Precursor;	SubName: Full=Uncharacterized protein {ECO:0000313|EMBL:KNA10542.1};	Aspartyl protease	GO:0048046,apoplast; GO:0005618,cell wall; GO:0009505,plant-type cell wall; GO:0004190,aspartic-type endopeptidase activity; GO:0000166,nucleotide binding; GO:0030163,protein catabolic process; GO:0006508,proteolysis; GO:0043067,regulation of programmed cell death; GO:0009627,systemic acquired resistance	PF14543.6:Xylanase inhibitor N-terminal
gene-LOC110700308	85.86	71.97	8.35	6.03	3.34	1.35	1630	1301	130	113	59	21	-3.90196	2.75836e-05	0.00477373	down	NW_018744626.1	690834	692609	+	LOC110700308	--	--	--	uncharacterized protein At5g48480-like [Chenopodium quinoa]	RecName: Full=Uncharacterized protein At5g48480;	SubName: Full=Uncharacterized protein {ECO:0000313|EMBL:KNA18622.1};	--	GO:0005829,cytosol	PF18029.1:Glyoxalase-like domain
gene-LOC110700711	10.21	10.63	0	0	0.02	0	581	576	0	0	1	0	-9.91835	2.82457e-05	0.00483385	down	NW_018744626.1	6071319	6075723	+	LOC110700711	--	K07466 replication factor A1 | (RefSeq) replication protein A 70 kDa DNA-binding subunit A-like (A)	ko03030: DNA replication; ko03420: Nucleotide excision repair; ko03430: Mismatch repair; ko03440: Homologous recombination	replication protein A 70 kDa DNA-binding subunit B-like [Chenopodium quinoa]	RecName: Full=Replication protein A 70 kDa DNA-binding subunit B; Short=AtRPA70B; AltName: Full=AtRPA1-5; AltName: Full=Replication factor A protein 1B; AltName: Full=Replication protein A 1B; Short=AtRPA1B;	RecName: Full=Replication protein A subunit {ECO:0000256|RuleBase:RU364130};	Single-stranded DNA-binding replication protein A (RPA), large (70 kD) subunit and related ssDNA-binding proteins	GO:0005634,nucleus; GO:0003677,DNA binding; GO:0046872,metal ion binding; GO:0006310,DNA recombination; GO:0006281,DNA repair; GO:0006260,DNA replication; GO:0010224,response to UV-B	PF08646.10:Replication factor-A C terminal domain
gene-LOC110707528	10.33	9.56	8.16	22.17	21.39	22.17	261	230	169	553	503	459	1.24614	2.84328e-05	0.00483385	up	NW_018745000.1	4908049	4912451	+	LOC110707528	--	K00860 adenylylsulfate kinase [EC:2.7.1.25] | (RefSeq) adenylyl-sulfate kinase 3-like (A)	ko00230: Purine metabolism; ko00920: Sulfur metabolism	adenylyl-sulfate kinase 3-like [Chenopodium quinoa]	RecName: Full=Adenylyl-sulfate kinase 3; EC=2.7.1.25; AltName: Full=ATP adenosine-5'-phosphosulfate 3'-phosphotransferase 3; AltName: Full=Adenosine-5'-phosphosulfate kinase 3; Short=APS kinase 3;	RecName: Full=Adenylyl-sulfate kinase {ECO:0000256|RuleBase:RU004347}; EC=2.7.1.25 {ECO:0000256|RuleBase:RU004347};	Adenosine 5'-phosphosulfate kinase	GO:0005829,cytosol; GO:0004020,adenylylsulfate kinase activity; GO:0005524,ATP binding; GO:0019344,cysteine biosynthetic process; GO:0070814,hydrogen sulfide biosynthetic process; GO:0000103,sulfate assimilation	PF01583.20:Adenylylsulphate kinase
novel.1462	0	0	0	0.948362	1.64643	3.10993	0	0	0	28	50	85	8.2969	2.84381e-05	0.00483385	up	NW_018742630.1	1403074	1403388	.	--	--	--	--	--	--	--	--	--	--
gene-LOC110740021	0.71	0.94	2.82	0	0.02	0	34	43	111	0	1	0	-7.53185	2.85284e-05	0.00483385	down	NW_018743518.1	823445	826657	+	LOC110740021	--	--	--	uncharacterized protein LOC110740021 [Chenopodium quinoa]	--	SubName: Full=Uncharacterized protein {ECO:0000313|EMBL:KNA11135.1};	--	--	--
gene-LOC110690423	65.29	62.23	77.23	183.19	167.88	314.17	1191	1081	1155	3300	2851	4696	1.72037	2.8798e-05	0.00485411	up	NW_018742329.1	3371212	3382953	-	LOC110690423	--	--	--	uncharacterized protein LOC110690423 [Chenopodium quinoa]	--	SubName: Full=Uncharacterized protein {ECO:0000313|EMBL:KMS95839.1};	--	GO:0005777,peroxisome	--
gene-LOC110717335	15.76	16.37	4.75	2.18	1.25	0.96	461	456	114	63	34	23	-3.02388	2.89991e-05	0.00486269	down	NW_018745684.1	1261252	1264779	-	LOC110717335	--	--	--	uncharacterized protein LOC110717335 [Chenopodium quinoa]	--	SubName: Full=Uncharacterized protein {ECO:0000313|EMBL:KNA19943.1};	--	--	PF13266.6:Protein of unknown function (DUF4057)
gene-LOC110723200	75.99	87.07	18.64	4.77	0.23	0.26	1790	1953	360	111	5	5	-5.02074	2.93652e-05	0.00488849	down	NW_018742720.1	2915823	2918747	-	LOC110723200	--	K01859 chalcone isomerase [EC:5.5.1.6] | (RefSeq) probable chalcone--flavonone isomerase 3 (A)	ko00941: Flavonoid biosynthesis	probable chalcone--flavonone isomerase 3 [Chenopodium quinoa]	RecName: Full=Probable chalcone--flavonone isomerase 3; Short=Chalcone isomerase 3; EC=5.5.1.6; AltName: Full=Chalcone isomerase-like 1;	RecName: Full=Chalcone-flavonone isomerase family protein {ECO:0000256|RuleBase:RU361158};	--	GO:0005783,endoplasmic reticulum; GO:0045430,chalcone isomerase activity; GO:0009813,flavonoid biosynthetic process; GO:0080167,response to karrikin	PF02431.15:Chalcone-flavanone isomerase
gene-LOC110728825	8.21	9.31	11.78	23.33	31.11	37.27	251	271	295	704	885	933	1.64907	2.94551e-05	0.00488849	up	NW_018742963.1	1126497	1136839	-	LOC110728825	--	K24028 salicylic acid 3-hydroxylase [EC:1.14.11.-] | (RefSeq) protein DOWNY MILDEW RESISTANCE 6-like (A)	--	protein SRG1-like [Chenopodium quinoa]	RecName: Full=Protein SRG1; Short=AtSRG1; AltName: Full=Protein SENESCENCE-RELATED GENE 1;	SubName: Full=Uncharacterized protein {ECO:0000313|EMBL:KMS96663.1};	Iron/ascorbate family oxidoreductases	GO:0046872,metal ion binding; GO:0016682,oxidoreductase activity, acting on diphenols and related substances as donors, oxygen as acceptor; GO:0010150,leaf senescence	PF03171.20:2OG-Fe(II) oxygenase superfamily
gene-LOC110685022	97.48	107.38	113.31	198.3	546.58	747.52	1698	1781	1618	3411	8863	10669	2.2338	2.99323e-05	0.00494235	up	NW_018743791.1	731573	732418	+	LOC110685022	--	K13449 pathogenesis-related protein 1 | (RefSeq) pathogenesis-related protein PR-1 type-like (A)	ko04016: MAPK signaling pathway - plant; ko04075: Plant hormone signal transduction; ko04626: Plant-pathogen interaction	pathogenesis-related protein PR-1 type-like [Chenopodium quinoa]	RecName: Full=Pathogenesis-related protein PR-1 type; Flags: Precursor;	SubName: Full=Uncharacterized protein {ECO:0000313|EMBL:KNA21092.1};	Defense-related protein containing SCP domain	GO:0005576,extracellular region; GO:0006952,defense response; GO:0009607,response to biotic stimulus	PF00188.26:Cysteine-rich secretory protein family
gene-LOC110732652	18.94	16.62	13.29	30.16	40.19	37.5	742	620	427	1167	1466	1204	1.1553	3.02253e-05	0.00496538	up	NW_018743175.1	4749805	4753309	-	LOC110732652	--	--	--	uncharacterized protein LOC110732652 [Chenopodium quinoa]	--	SubName: Full=Uncharacterized protein {ECO:0000313|EMBL:KNA24869.1};	--	GO:0016021,integral component of membrane	--
gene-LOC110708314	1.63	1.42	2.08	0.11	0.06	0	92	76	96	6	3	0	-4.93099	3.07557e-05	0.00502701	down	NW_018742418.1	851263	854000	-	LOC110708314	--	K22683 aspartyl protease family protein [EC:3.4.23.-] | (RefSeq) aspartyl protease family protein 2-like (A)	--	aspartic proteinase CDR1-like [Chenopodium quinoa]	RecName: Full=Aspartic proteinase CDR1; EC=3.4.23.-; AltName: Full=Protein CONSTITUTIVE DISEASE RESISTANCE 1; Flags: Precursor;	SubName: Full=Uncharacterized protein {ECO:0000313|EMBL:KNA18019.1}; Flags: Fragment;	Aspartyl protease	GO:0048046,apoplast; GO:0004190,aspartic-type endopeptidase activity; GO:0042742,defense response to bacterium; GO:0030163,protein catabolic process; GO:0010310,regulation of hydrogen peroxide metabolic process; GO:0010337,regulation of salicylic acid metabolic process	PF14543.6:Xylanase inhibitor N-terminal
gene-LOC110733855	2.98	2.61	2.65	6.49	17.04	31.54	144	120	105	310	767	1250	2.76017	3.1015e-05	0.00504391	up	NW_018743204.1	1421043	1427127	-	LOC110733855	--	--	--	--	--	--	--	--	--
novel.2750	0.051784	0	0	1.20104	0.447424	4.03903	4	0	0	92	36	287	6.95942	3.26175e-05	0.00527725	up	NW_018743108.1	185779	190127	+	--	--	--	--	elongin-C-like isoform X2 [Chenopodium quinoa]	--	--	--	--	--
gene-LOC110682043	9.53	7.73	5.03	26.48	23.76	79.78	645	498	279	1770	1497	4424	2.59617	3.2776e-05	0.00527725	up	NW_018743574.1	2889677	2896628	+	LOC110682043	--	--	--	uncharacterized protein LOC110682043 isoform X1 [Chenopodium quinoa]	--	--	--	--	--
gene-LOC110701196	230.88	247.28	0	1.84	0.9	0.6	4692	4785	0	37	17	10	-7.09386	3.29579e-05	0.00528027	down	NW_018744633.1	4753485	4754471	+	LOC110701196	--	--	--	uncharacterized protein LOC110701196 [Chenopodium quinoa]	--	SubName: Full=Uncharacterized protein {ECO:0000313|EMBL:KNA14131.1};	--	--	PF04398.12:Protein of unknown function, DUF538
gene-LOC110716012	0.86	0.76	0	21.28	4.05	41.51	25	21	0	608	109	984	5.45513	3.3283e-05	0.0053061	up	NW_018745540.1	1570522	1574159	+	LOC110716012	--	K00059 3-oxoacyl-[acyl-carrier protein] reductase [EC:1.1.1.100] | (RefSeq) 3-oxoacyl-[acyl-carrier-protein] reductase 4-like (A)	ko00061: Fatty acid biosynthesis; ko00780: Biotin metabolism; ko01212: Fatty acid metabolism	glucose and ribitol dehydrogenase-like [Chenopodium quinoa]	RecName: Full=Glucose and ribitol dehydrogenase; EC=1.1.1.-; AltName: Full=Carrot ABA-induced in somatic embryos 5 protein;	SubName: Full=Uncharacterized protein {ECO:0000313|EMBL:KNA13602.1};	Reductases with broad range of substrate specificities	GO:0016491,oxidoreductase activity	PF13561.6:Enoyl-(Acyl carrier protein) reductase
novel.188	607.375	579.051	593.265	946.651	5754.69	5402.26	44114	39816	43768	70040	438503	369548	2.81546	3.39867e-05	0.00539173	up	NW_018742204.1	21445752	21453969	-	--	--	--	--	hypothetical protein SOVF_020890 [Spinacia oleracea]	RecName: Full=Antimicrobial peptide 2; Short=AMP2; Contains: RecName: Full=Antimicrobial peptide 1; Short=AMP1; Flags: Precursor;	SubName: Full=Uncharacterized protein {ECO:0000313|EMBL:KNA23935.1};	--	GO:0008061,chitin binding; GO:0042742,defense response to bacterium; GO:0050832,defense response to fungus; GO:0031640,killing of cells of other organism	PF00187.19:Chitin recognition protein
gene-LOC110709711	12.75	9.78	4.2	1.57	1.22	1.84	593	433	160	72	53	70	-2.48515	3.54384e-05	0.00556918	down	NW_018745080.1	1629649	1632864	+	LOC110709711	--	--	--	zinc-finger homeodomain protein 1-like isoform X1 [Chenopodium quinoa]	RecName: Full=Zinc-finger homeodomain protein 1; Short=OsZHD1;	SubName: Full=Uncharacterized protein {ECO:0000313|EMBL:KNA20929.1};	--	GO:0005634,nucleus; GO:0003677,DNA binding; GO:0046872,metal ion binding; GO:0006355,regulation of transcription, DNA-templated; GO:0006351,transcription, DNA-templated	PF04770.12:ZF-HD protein dimerisation region
gene-LOC110730834	10.99	11.98	21.27	43.53	59.01	98.02	390	405	619	1526	1950	2851	2.18131	3.54495e-05	0.00556918	up	NW_018743050.1	577846	580187	+	LOC110730834	--	--	--	fasciclin-like arabinogalactan protein 2 [Chenopodium quinoa]	RecName: Full=Fasciclin-like arabinogalactan protein 2; Flags: Precursor;	SubName: Full=Uncharacterized protein {ECO:0000313|EMBL:KNA19187.1};	--	GO:0031225,anchored component of membrane; GO:0046658,anchored component of plasma membrane; GO:0016020,membrane; GO:0005886,plasma membrane; GO:0005774,vacuolar membrane	PF02469.22:Fasciclin domain
gene-LOC110719865	48.1	52.57	34.91	19.33	22.23	17.27	1227	1277	730	487	528	361	-1.1904	3.61576e-05	0.00565299	down	NW_018742493.1	431779	433683	-	LOC110719865	--	--	--	--	--	--	--	--	--
gene-LOC110738191	15.21	14.13	0	0	0	0	587	519	0	0	0	0	-10.8129	3.6535e-05	0.00568454	down	NW_018743381.1	296803	307803	-	LOC110738191	--	--	--	--	--	--	--	--	--
gene-LOC110732719	3.14	3.58	3.86	7.9	8.51	8.09	276	299	278	685	696	582	1.21791	3.7013e-05	0.00573135	up	NW_018743175.1	5377146	5383644	-	LOC110732719	--	K20617 cytochrome P450 family 71 subfamily A | (RefSeq) cytochrome P450 71A1-like (A)	--	flavonoid 3'-monooxygenase-like [Chenopodium quinoa]	RecName: Full=Flavonoid 3'-monooxygenase; EC=1.14.13.21; AltName: Full=Cytochrome P450 75B1; AltName: Full=Flavonoid 3'-hydroxylase; Short=AtF3'H; AltName: Full=Protein TRANSPARENT TESTA 7;	SubName: Full=Uncharacterized protein {ECO:0000313|EMBL:EMJ11386.1};	Cytochrome P450 CYP2 subfamily	GO:0005789,endoplasmic reticulum membrane; GO:0016021,integral component of membrane; GO:0016020,membrane; GO:0016711,flavonoid 3'-monooxygenase activity; GO:0020037,heme binding; GO:0005506,iron ion binding; GO:0009813,flavonoid biosynthetic process; GO:0009733,response to auxin; GO:0044550,secondary metabolite biosynthetic process	PF00067.22:Cytochrome P450
gene-LOC110731828	6.41	5.44	6.71	15.44	18.64	30.19	296	239	254	704	801	1142	1.80814	3.7593e-05	0.00579343	up	NW_018743099.1	1317997	1326054	-	LOC110731828	--	K12486 stromal membrane-associated protein | (RefSeq) ADP-ribosylation factor GTPase-activating protein AGD12-like (A)	ko04144: Endocytosis	synaptotagmin-3-like [Chenopodium quinoa]	RecName: Full=Synaptotagmin-3; AltName: Full=NTMC2T1.3; AltName: Full=Synaptotagmin C;	SubName: Full=Uncharacterized protein {ECO:0000313|EMBL:KNA15372.1};	Ca2+-dependent lipid-binding protein CLB1/vesicle protein vp115/Granuphilin A, contains C2 domain	GO:0005783,endoplasmic reticulum; GO:0016021,integral component of membrane; GO:0008289,lipid binding; GO:0046872,metal ion binding; GO:0006869,lipid transport	PF00168.30:C2 domain
gene-LOC110691392	0.84	0.51	0	14.53	5.55	20.53	19	11	0	325	117	381	4.98729	3.79867e-05	0.00580935	up	NW_018744080.1	408660	410718	-	LOC110691392	--	--	--	--	--	--	--	--	--
novel.1232	8.58978	9.99423	4.93402	2.97852	2.762	2.78188	778	857	454	276	263	237	-1.36835	3.80552e-05	0.00580935	down	NW_018742523.1	2389483	2392119	+	--	--	K19984 exocyst complex component 5 | (RefSeq) uncharacterized protein LOC113272286 (A)	--	zinc finger BED domain-containing protein RICESLEEPER 2-like [Chenopodium quinoa]	RecName: Full=Zinc finger BED domain-containing protein RICESLEEPER 2; AltName: Full=Transposase-like protein RICESLEEPER 2;	SubName: Full=Putative Zinc finger, BED-type {ECO:0000313|EMBL:OMP07002.1};	Tam3-transposase (Ac family)	GO:0005634,nucleus; GO:0003700,DNA-binding transcription factor activity; GO:0046872,metal ion binding; GO:0046983,protein dimerization activity; GO:0000977,RNA polymerase II regulatory region sequence-specific DNA binding; GO:0009791,post-embryonic development; GO:0006357,regulation of transcription by RNA polymerase II; GO:0006351,transcription, DNA-templated	PF02892.15:BED zinc finger
gene-LOC110698768	205.77	194.5	132.84	325.38	516.51	580.54	8783	7905	4648	13714	20523	20303	1.43384	3.87989e-05	0.00589507	up	NW_018744537.1	4617775	4622476	+	LOC110698768	--	--	--	sulfite exporter TauE/SafE family protein 3-like [Chenopodium quinoa]	RecName: Full=Sulfite exporter TauE/SafE family protein 3 {ECO:0000312|EMBL:AEC07746.1};	SubName: Full=Uncharacterized protein {ECO:0000313|EMBL:KNA07860.1};	--	GO:0016021,integral component of membrane	PF01925.19:Sulfite exporter TauE/SafE
novel.916	0	0	0	0.658698	0.425433	2.33229	0	0	0	37	24	118	8.48213	4.06194e-05	0.00614283	up	NW_018742418.1	4720589	4721176	.	--	--	--	--	--	--	--	--	--	--
gene-LOC110706896	6.77	6.74	6.52	13.59	30.98	19.72	296	281	234	587	1262	707	1.67002	4.09907e-05	0.00614283	up	NW_018744991.1	1609143	1618788	+	LOC110706896	--	K01466 allantoinase [EC:3.5.2.5] | (RefSeq) allantoinase-like isoform X1 (A)	ko00230: Purine metabolism	allantoinase-like isoform X2 [Chenopodium quinoa]	RecName: Full=Allantoinase; Short=AtALN; EC=3.5.2.5;	SubName: Full=Uncharacterized protein {ECO:0000313|EMBL:KNA14579.1};	Dihydroorotase and related enzymes	GO:0005783,endoplasmic reticulum; GO:0004038,allantoinase activity; GO:0050897,cobalt ion binding; GO:0008270,zinc ion binding; GO:0000256,allantoin catabolic process; GO:0006995,cellular response to nitrogen starvation; GO:0006145,purine nucleobase catabolic process; GO:0010136,ureide catabolic process	PF01979.20:Amidohydrolase family
gene-LOC110714789	104.12	97.84	98.42	177.14	529.92	745.44	2594	2321	2010	4358	12290	15217	2.28173	4.11212e-05	0.00614283	up	NW_018745461.1	1057974	1060081	+	LOC110714789	--	K08235 xyloglucan:xyloglucosyl transferase [EC:2.4.1.207] | (RefSeq) xyloglucan endotransglucosylase/hydrolase protein 24-like (A)	--	xyloglucan endotransglucosylase/hydrolase protein 24-like [Chenopodium quinoa]	RecName: Full=Xyloglucan endotransglucosylase/hydrolase protein 24; Short=At-XTH24; Short=XTH-24; EC=2.4.1.207; AltName: Full=Endo-xyloglucan transferase; AltName: Full=Meristem protein 5; Short=MERI-5 protein; Short=MERI5 protein; AltName: Full=Xyloglucan endo-1,4-beta-D-glucanase; Flags: Precursor;	RecName: Full=Xyloglucan endotransglucosylase/hydrolase {ECO:0000256|RuleBase:RU361120}; EC=2.4.1.207 {ECO:0000256|RuleBase:RU361120};	--	GO:0048046,apoplast; GO:0005618,cell wall; GO:0005737,cytoplasm; GO:0005794,Golgi apparatus; GO:0009505,plant-type cell wall; GO:0005886,plasma membrane; GO:0004553,hydrolase activity, hydrolyzing O-glycosyl compounds; GO:0016762,xyloglucan:xyloglucosyl transferase activity; GO:0042546,cell wall biogenesis; GO:0009828,plant-type cell wall loosening; GO:0071669,plant-type cell wall organization or…	PF00722.21:Glycosyl hydrolases family 16
gene-LOC110708393	7.46	8.41	1.56	0.77	0.56	0.3	460	494	79	47	32	15	-3.37919	4.11888e-05	0.00614283	down	NW_018745024.1	6201749	6210403	+	LOC110708393	--	K21776 protein lin-54 | (RefSeq) protein tesmin/TSO1-like CXC 3 (A)	--	protein tesmin/TSO1-like CXC 3 isoform X1 [Chenopodium quinoa]	RecName: Full=CRC domain-containing protein TSO1;	SubName: Full=Uncharacterized protein {ECO:0000313|EMBL:KNA11165.1};	Metallothionein-like protein	GO:0005634,nucleus; GO:0003700,DNA-binding transcription factor activity; GO:0046872,metal ion binding; GO:0048444,floral organ morphogenesis; GO:0051302,regulation of cell division; GO:0009934,regulation of meristem structural organization	PF03638.15:Tesmin/TSO1-like CXC domain, cysteine-rich domain
gene-LOC110724732	69.17	72.18	54.59	116.82	204.7	240.55	2031	2018	1314	3387	5595	5787	1.53423	4.17087e-05	0.00619005	up	NW_018742770.1	3136090	3139272	-	LOC110724732	--	K01373 cathepsin F [EC:3.4.22.41] | (RefSeq) cysteine protease RD19A-like (A)	ko04626: Plant-pathogen interaction	cysteine protease RD19A-like [Chenopodium quinoa]	RecName: Full=Cysteine protease RD19A {ECO:0000305}; EC=3.4.22.- {ECO:0000305}; AltName: Full=Protein RESPONSIVE TO DEHYDRATION 19 {ECO:0000303|PubMed:8325504}; Short=RD19 {ECO:0000303|PubMed:8325504}; Flags: Precursor;	SubName: Full=Uncharacterized protein {ECO:0000313|EMBL:KNA09690.1};	Cysteine proteinase Cathepsin F	GO:0005615,extracellular space; GO:0005764,lysosome; GO:0000323,lytic vacuole; GO:0005634,nucleus; GO:0005773,vacuole; GO:0004197,cysteine-type endopeptidase activity; GO:0042742,defense response to bacterium; GO:0051603,proteolysis involved in cellular protein catabolic process; GO:0006970,response to osmotic stress; GO:0009651,response to salt stress	PF00112.23:Papain family cysteine protease
novel.4574	10.8423	11.3836	0	0	0	0	533	530	0	0	0	0	-10.7579	4.1888e-05	0.00619005	down	NW_018743920.1	1886134	1888922	+	--	--	--	--	hypothetical protein SOVF_191020 [Spinacia oleracea]	--	SubName: Full=Uncharacterized protein {ECO:0000313|EMBL:KNA05366.1};	--	--	--
gene-LOC110708057	12.2	12.66	9.82	24.01	28.53	27.96	244	241	161	474	531	458	1.22823	4.30387e-05	0.00633119	up	NW_018745003.1	4960331	4961301	+	LOC110708057	--	--	--	putative protein TPRXL [Chenopodium quinoa]	--	SubName: Full=Uncharacterized protein {ECO:0000313|EMBL:KNA22668.1};	--	--	--
gene-LOC110729673	5.38	7.41	7.82	0.88	1.97	1.22	167	219	199	27	57	31	-2.35718	4.32875e-05	0.00633898	down	NW_018742987.1	1685718	1699218	-	LOC110729673	--	K14397 cleavage and polyadenylation specificity factor subunit 5 | (RefSeq) pre-mRNA cleavage factor Im 25 kDa subunit 2-like (A)	ko03015: mRNA surveillance pathway	pre-mRNA cleavage factor Im 25 kDa subunit 2-like [Chenopodium quinoa]	RecName: Full=Pre-mRNA cleavage factor Im 25 kDa subunit 2 {ECO:0000303|PubMed:18479511};	SubName: Full=Uncharacterized protein {ECO:0000313|EMBL:KNA23914.1};	mRNA cleavage factor I subunit	GO:0005849,mRNA cleavage factor complex; GO:0016787,hydrolase activity; GO:0046872,metal ion binding; GO:0003729,mRNA binding; GO:0006378,mRNA polyadenylation	PF13869.6:Nucleotide hydrolase
gene-LOC110712880	4.58	6.8	5.44	14.24	26.17	16.72	116	164	113	356	617	347	1.75605	4.4192e-05	0.00644228	up	NW_018742418.1	8714675	8716232	-	LOC110712880	--	--	--	NAC transcription factor 29-like [Chenopodium quinoa]	RecName: Full=NAC transcription factor 29; Short=AtNAC029; AltName: Full=Protein NAC-LIKE, ACTIVATED BY AP3/PI; Short=AtNAP;	SubName: Full=Uncharacterized protein {ECO:0000313|EMBL:KNA22936.1};	--	GO:0005634,nucleus; GO:0003677,DNA binding; GO:0003700,DNA-binding transcription factor activity; GO:0009793,embryo development ending in seed dormancy; GO:0009908,flower development; GO:0009835,fruit ripening; GO:0010150,leaf senescence; GO:0009825,multidimensional cell growth; GO:0006351,transcription, DNA-templated	PF02365.15:No apical meristem (NAM) protein
gene-LOC110731547	13.88	13.75	2.96	0.5	0.41	0	875	825	153	31	24	0	-5.04907	4.49685e-05	0.00652608	down	NW_018743074.1	434775	438554	-	LOC110731547	--	K15398 fatty acid omega-hydroxylase [EC:1.14.-.-] | (RefSeq) cytochrome P450 86A8-like (A)	ko00073: Cutin, suberine and wax biosynthesis	cytochrome P450 86A8-like [Chenopodium quinoa]	RecName: Full=Cytochrome P450 86A8; EC=1.14.14.1; AltName: Full=Protein LACERATA;	SubName: Full=Uncharacterized protein {ECO:0000313|EMBL:KNA19470.1};	Cytochrome P450 CYP4/CYP19/CYP26 subfamilies	GO:0016021,integral component of membrane; GO:0018685,alkane 1-monooxygenase activity; GO:0070330,aromatase activity; GO:0020037,heme binding; GO:0005506,iron ion binding; GO:0006631,fatty acid metabolic process	PF00067.22:Cytochrome P450
novel.4704	3.10775	2.83398	2.834	0.621486	1.06709	0.562144	314	271	290	64	113	54	-1.93336	4.59444e-05	0.0066295	down	NW_018743946.1	2009071	2010174	.	--	--	--	--	--	--	--	--	--	--
gene-LOC110725883	44.52	45.99	6.39	4.57	1.48	1.59	1165	1146	137	118	36	34	-3.59687	4.60909e-05	0.0066295	down	NW_018742815.1	5798597	5801322	-	LOC110725883	--	--	--	uclacyanin-3-like [Chenopodium quinoa]	RecName: Full=Early nodulin-like protein 1; AltName: Full=Phytocyanin-like protein; Flags: Precursor;	SubName: Full=Uncharacterized protein {ECO:0000313|EMBL:KNA25448.1};	--	GO:0031225,anchored component of membrane; GO:0046658,anchored component of plasma membrane; GO:0005886,plasma membrane; GO:0009506,plasmodesma; GO:0009055,electron transfer activity	PF02298.17:Plastocyanin-like domain
novel.8347	97.3588	89.9762	62.5109	31.3311	10.728	20.2393	10971	9599	7156	3597	1269	2149	-1.92212	4.6521e-05	0.00666177	down	NW_018745523.1	1323124	1324358	-	--	--	--	--	hypothetical protein SOVF_084300 [Spinacia oleracea]	--	SubName: Full=Uncharacterized protein {ECO:0000313|EMBL:KNA16953.1};	--	GO:0006952,defense response	--
gene-LOC110730181	2.44	2.56	1.66	18.53	5.52	15.47	102	102	57	765	215	530	2.6219	4.71399e-05	0.00669748	up	NW_018743021.1	1155175	1160011	+	LOC110730181	--	--	--	--	--	--	--	--	--
gene-LOC110697695	9.96	8.87	10.56	24.92	52.56	124.45	138	117	120	341	678	1413	2.80241	4.71916e-05	0.00669748	up	NW_018744497.1	1255428	1258791	-	LOC110697695	--	--	--	--	--	--	--	--	--
novel.2105	0.32585	0.887081	10.7837	0	0.04456	0	16	41	522	0	3	0	-7.88466	4.73913e-05	0.00669748	down	NW_018742899.1	151841	152362	.	--	--	--	--	--	--	--	--	--	--
gene-LOC110708056	4.3	4.94	2.04	14.85	16.53	9.53	461	504	179	1572	1649	837	1.87758	4.78112e-05	0.00672745	up	NW_018745003.1	4932952	4941534	+	LOC110708056	--	--	--	uncharacterized protein LOC110708056 [Chenopodium quinoa]	--	SubName: Full=Uncharacterized protein {ECO:0000313|EMBL:KNA24774.1};	--	GO:0016021,integral component of membrane	PF04906.13:Tweety
gene-LOC110714081	4.49	4.15	4.2	1.14	1.06	0.9	159	140	122	40	35	26	-2.03765	4.94922e-05	0.00693384	down	NW_018745454.1	932334	939815	+	LOC110714081	--	--	--	AT-hook motif nuclear-localized protein 7-like isoform X1 [Chenopodium quinoa]	RecName: Full=AT-hook motif nuclear-localized protein 1 {ECO:0000303|PubMed:15604740};	SubName: Full=Uncharacterized protein {ECO:0000313|EMBL:KNA22280.1};	--	GO:0098687,chromosomal region; GO:0005737,cytoplasm; GO:0005739,mitochondrion; GO:0005730,nucleolus; GO:0005654,nucleoplasm; GO:0005634,nucleus; GO:0003680,AT DNA binding; GO:0003677,DNA binding; GO:0043565,sequence-specific DNA binding; GO:0006355,regulation of transcription, DNA-templated; GO:0006351,transcription, DNA-templated	PF03479.15:Plants and Prokaryotes Conserved (PCC) domain
gene-LOC110696502	6.21	6.01	2.74	1.14	1.48	0.59	972	895	351	176	216	76	-2.20766	5.19809e-05	0.00725111	down	NW_018744367.1	1343272	1363216	-	LOC110696502	--	K11262 acetyl-CoA carboxylase / biotin carboxylase 1 [EC:6.4.1.2 6.3.4.14 2.1.3.15] | (RefSeq) acetyl-CoA carboxylase 1-like (A)	ko00061: Fatty acid biosynthesis; ko00254: Aflatoxin biosynthesis; ko00620: Pyruvate metabolism; ko00640: Propanoate metabolism; ko01212: Fatty acid metabolism	acetyl-CoA carboxylase 1-like [Chenopodium quinoa]	RecName: Full=Acetyl-CoA carboxylase 1; Short=AtACC1; EC=6.4.1.2 {ECO:0000269|PubMed:9008389}; AltName: Full=Protein EMBRYO DEFECTIVE 22; AltName: Full=Protein GURKE; AltName: Full=Protein PASTICCINO 3; Includes: RecName: Full=Biotin carboxylase; EC=6.3.4.14;	SubName: Full=Uncharacterized protein {ECO:0000313|EMBL:KNA10199.1}; Flags: Fragment;	Acetyl-CoA carboxylase	GO:0005829,cytosol; GO:0005886,plasma membrane; GO:0003989,acetyl-CoA carboxylase activity; GO:0005524,ATP binding; GO:0004075,biotin carboxylase activity; GO:0046872,metal ion binding; GO:0009793,embryo development ending in seed dormancy; GO:0030497,fatty acid elongation; GO:2001295,malonyl-CoA biosynthetic process; GO:0009933,meristem structural organization; GO:0010072,primary shoot apical me…	PF08326.12:Acetyl-CoA carboxylase, central region
novel.7539	7.98348	9.78739	10.3979	24.1942	28.7109	23.001	367	426	486	1132	1384	995	1.44364	5.3082e-05	0.00735113	up	NW_018745105.1	2179165	2181820	+	--	--	--	--	--	--	--	--	--	--
gene-LOC110713794	2.01	2.44	3.8	9.03	11.19	12.04	83	96	129	369	431	408	1.96413	5.31584e-05	0.00735113	up	NW_018742204.1	9749876	9756217	+	LOC110713794	--	K03327 multidrug resistance protein, MATE family | (RefSeq) protein DETOXIFICATION 12-like (A)	--	protein DETOXIFICATION 12-like [Chenopodium quinoa]	RecName: Full=Protein DETOXIFICATION 14 {ECO:0000303|PubMed:11739388}; Short=AtDTX14 {ECO:0000303|PubMed:11739388}; AltName: Full=Multidrug and toxic compound extrusion protein 14 {ECO:0000305}; Short=MATE protein 14 {ECO:0000305};	RecName: Full=Protein DETOXIFICATION {ECO:0000256|RuleBase:RU004914}; AltName: Full=Multidrug and toxic compound extrusion protein {ECO:0000256|RuleBase:RU004914};	Uncharacterized membrane protein, predicted efflux pump	GO:0016021,integral component of membrane; GO:0005774,vacuolar membrane; GO:0015297,antiporter activity; GO:0015238,drug transmembrane transporter activity; GO:0046618,drug export; GO:0006855,drug transmembrane transport	PF01554.18:MatE
gene-LOC110690675	88.59	86.81	120.28	13.11	0.86	9.04	1328	1239	1478	194	12	111	-3.6332	5.33793e-05	0.00735113	down	NW_018744062.1	932564	933534	+	LOC110690675	--	--	--	non-specific lipid-transfer protein-like [Chenopodium quinoa]	RecName: Full=Non-specific lipid-transfer protein; Short=LTP; Flags: Precursor;	RecName: Full=Non-specific lipid-transfer protein {ECO:0000256|RuleBase:RU000628};	--	GO:0008289,lipid binding; GO:0050832,defense response to fungus; GO:0031640,killing of cells of other organism; GO:0006869,lipid transport	PF00234.22:Protease inhibitor/seed storage/LTP family
novel.6171	0	0	0	1.75022	0.256396	0.79417	0	0	0	113	17	48	8.37036	5.40812e-05	0.00736204	up	NW_018744593.1	5059362	5060052	.	--	--	--	--	hypothetical protein BVRB_1g008890 [Beta vulgaris subsp. vulgaris]	--	SubName: Full=Uncharacterized protein {ECO:0000313|EMBL:KMS64625.1}; Flags: Fragment;	--	--	--
gene-LOC110720753	32.87	26.78	7.54	2.07	4.08	1.11	580	450	109	36	67	16	-3.20768	5.41201e-05	0.00736204	down	NW_018742577.1	2110263	2111119	-	LOC110720753	--	--	--	glycine-rich cell wall structural protein 1-like [Chenopodium quinoa]	--	SubName: Full=Uncharacterized protein {ECO:0000313|EMBL:KNA16545.1};	--	--	--
gene-LOC110718304	3.47	3.07	2.6	7.45	11.11	15.67	145	122	89	307	432	536	1.9235	5.42805e-05	0.00736204	up	NW_018745684.1	1684294	1686321	-	LOC110718304	--	K14209 solute carrier family 36 (proton-coupled amino acid transporter) | (RefSeq) amino acid transporter AVT3C-like (A)	--	amino acid transporter AVT3C-like [Chenopodium quinoa]	RecName: Full=Amino acid transporter AVT3C {ECO:0000305}; Short=AtAvt3C {ECO:0000303|PubMed:27925655}; AltName: Full=Aromatic and neutral amino acid transporter-like protein 2 {ECO:0000305};	SubName: Full=Uncharacterized protein {ECO:0000313|EMBL:KNA04970.1};	Amino acid transporters	GO:0016021,integral component of membrane; GO:0005774,vacuolar membrane; GO:0015171,amino acid transmembrane transporter activity; GO:0015175,neutral amino acid transmembrane transporter activity; GO:0003333,amino acid transmembrane transport; GO:0015804,neutral amino acid transport	PF01490.18:Transmembrane amino acid transporter protein
gene-LOC110697737	21.47	21.43	18.66	10.11	7.84	6.97	1030	979	734	479	350	274	-1.28593	5.45723e-05	0.00736204	down	NW_018744498.1	315121	320848	-	LOC110697737	--	K14497 protein phosphatase 2C [EC:3.1.3.16] | (RefSeq) probable protein phosphatase 2C 6 (A)	ko04016: MAPK signaling pathway - plant; ko04075: Plant hormone signal transduction	probable protein phosphatase 2C 52 [Chenopodium quinoa]	RecName: Full=Probable protein phosphatase 2C 52; Short=AtPP2C52; EC=3.1.3.16;	SubName: Full=Uncharacterized protein {ECO:0000313|EMBL:KNA09338.1};	Serine/threonine protein phosphatase	GO:0005886,plasma membrane; GO:0046872,metal ion binding; GO:0004721,phosphoprotein phosphatase activity; GO:0004722,protein serine/threonine phosphatase activity; GO:0006470,protein dephosphorylation	PF00481.21:Protein phosphatase 2C
novel.4701	0	0	0	0.879154	0.463864	5.97606	0	0	0	28	16	176	8.8212	5.4596e-05	0.00736204	up	NW_018743946.1	1393405	1393746	.	--	--	--	--	--	--	--	--	--	--
gene-LOC110714494	41.18	43.85	36.84	4.54	16.48	8.42	1863	1889	1366	203	694	312	-2.07201	5.63676e-05	0.0075694	down	NW_018745454.1	2430188	2435534	+	LOC110714494	--	K13508 glycerol-3-phosphate acyltransferase [EC:2.3.1.15 2.3.1.198] | (RefSeq) glycerol-3-phosphate 2-O-acyltransferase 4-like (A)	ko00561: Glycerolipid metabolism; ko00564: Glycerophospholipid metabolism	glycerol-3-phosphate 2-O-acyltransferase 4-like [Chenopodium quinoa]	RecName: Full=Glycerol-3-phosphate 2-O-acyltransferase 4; Short=AtGPAT4; EC=2.3.1.198; AltName: Full=Glycerol-3-phosphate acyltransferase 4;	SubName: Full=Uncharacterized protein {ECO:0000313|EMBL:KNA19467.1};	--	GO:0016021,integral component of membrane; GO:0016020,membrane; GO:0090447,glycerol-3-phosphate 2-O-acyltransferase activity; GO:0016791,phosphatase activity; GO:0102419,sn-2-glycerol-3-phosphate omega-OH-C22:0-CoA acyl transferase activity; GO:0010143,cutin biosynthetic process; GO:0008654,phospholipid biosynthetic process	PF12710.7:haloacid dehalogenase-like hydrolase
gene-LOC110711679	12.72	13.38	0	0	0	0	487	488	0	0	0	0	-10.6334	5.71343e-05	0.00764065	down	NW_018745281.1	3324254	3329368	+	LOC110711679	--	K13065 shikimate O-hydroxycinnamoyltransferase [EC:2.3.1.133] | (RefSeq) anthranilate N-benzoyltransferase protein 2-like (A)	ko00940: Phenylpropanoid biosynthesis; ko00941: Flavonoid biosynthesis; ko00945: Stilbenoid, diarylheptanoid and gingerol biosynthesis	protein ECERIFERUM 26-like [Chenopodium quinoa]	RecName: Full=Protein ECERIFERUM 26; AltName: Full=CER2-like protein 1; Short=CER2-like1;	SubName: Full=Uncharacterized protein {ECO:0000313|EMBL:KNA08436.1};	--	GO:0005829,cytosol; GO:0016747,transferase activity, transferring acyl groups other than amino-acyl groups; GO:0071555,cell wall organization; GO:0042761,very long-chain fatty acid biosynthetic process; GO:0010025,wax biosynthetic process	PF02458.15:Transferase family
gene-LOC110719952	18.63	14.7	13.63	34.11	43.08	27.14	1394	1047	836	2520	3001	1664	1.1556	5.93423e-05	0.00790327	up	NW_018742523.1	875094	911279	-	LOC110719952	--	K01006 pyruvate, orthophosphate dikinase [EC:2.7.9.1] | (RefSeq) pyruvate, phosphate dikinase, chloroplastic (A)	ko00010: Glycolysis / Gluconeogenesis; ko00620: Pyruvate metabolism; ko00710: Carbon fixation in photosynthetic organisms; ko01200: Carbon metabolism	pyruvate, phosphate dikinase, chloroplastic [Chenopodium quinoa]	RecName: Full=Pyruvate, phosphate dikinase, chloroplastic; EC=2.7.9.1 {ECO:0000250|UniProtKB:P11155}; AltName: Full=Pyruvate, orthophosphate dikinase; Flags: Precursor;	RecName: Full=Pyruvate, phosphate dikinase {ECO:0000256|PIRNR:PIRNR000853}; EC=2.7.9.1 {ECO:0000256|PIRNR:PIRNR000853};	--	GO:0009507,chloroplast; GO:0005524,ATP binding; GO:0016301,kinase activity; GO:0046872,metal ion binding; GO:0050242,pyruvate, phosphate dikinase activity; GO:0015979,photosynthesis; GO:0006090,pyruvate metabolic process	PF02896.18:PEP-utilising enzyme, TIM barrel domain
gene-LOC110733587	7.12	5.84	4.19	12.33	15.92	15.16	436	340	210	745	907	760	1.35673	6.02988e-05	0.00799774	up	NW_018743199.1	4020032	4023622	+	LOC110733587	--	K14515 EIN3-binding F-box protein | (RefSeq) EIN3-binding F-box protein 1-like (A)	ko04016: MAPK signaling pathway - plant; ko04075: Plant hormone signal transduction	EIN3-binding F-box protein 1-like [Chenopodium quinoa]	RecName: Full=EIN3-binding F-box protein 1; AltName: Full=F-box/LRR-repeat protein 6;	SubName: Full=Uncharacterized protein {ECO:0000313|EMBL:KNA18072.1};	Leucine rich repeat proteins, some proteins contain F-box	GO:0005634,nucleus; GO:0009873,ethylene-activated signaling pathway; GO:0010105,negative regulation of ethylene-activated signaling pathway; GO:0016567,protein ubiquitination; GO:0009723,response to ethylene; GO:0006511,ubiquitin-dependent protein catabolic process	PF13516.6:Leucine Rich repeat
gene-LOC110700271	6.42	5.44	5.36	12.1	31.72	44.47	171	138	117	318	786	970	2.36804	6.14386e-05	0.00811566	up	NW_018744626.1	241064	250422	-	LOC110700271	--	--	--	--	--	--	--	--	--
gene-LOC110689395	23.15	18.62	11.08	4.28	5.3	1.96	892	683	350	163	190	62	-2.187	6.19645e-05	0.0081303	down	NW_018743955.1	7708222	7710092	-	LOC110689395	--	--	--	glycine-rich cell wall structural protein-like [Chenopodium quinoa]	--	SubName: Full=Uncharacterized protein {ECO:0000313|EMBL:KNA24135.1};	--	--	--
novel.4334	4.57056	6.14229	0	0	0	0	420	534	0	0	0	0	-10.6063	6.20519e-05	0.0081303	down	NW_018743850.1	4932194	4933198	.	--	--	--	--	hypothetical protein SOVF_113330 [Spinacia oleracea]	--	SubName: Full=Uncharacterized protein {ECO:0000313|EMBL:KNA13811.1};	--	GO:0016021,integral component of membrane	--
gene-LOC110739967	5.01	4.31	5.72	1.45	1.12	1.22	206	169	193	59	43	41	-1.97611	6.69451e-05	0.00872106	down	NW_018743518.1	280073	289687	-	LOC110739967	--	K01246 DNA-3-methyladenine glycosylase I [EC:3.2.2.20] | (RefSeq) uncharacterized protein LOC110739967 isoform X1 (A)	ko03410: Base excision repair	uncharacterized protein LOC110739967 isoform X1 [Chenopodium quinoa]	--	SubName: Full=Uncharacterized protein {ECO:0000313|EMBL:KNA24711.1};	--	GO:0008725,DNA-3-methyladenine glycosylase activity; GO:0006284,base-excision repair	PF03352.13:Methyladenine glycosylase
gene-LOC110733038	16.51	17.34	4.3	0.83	0.29	0	543	543	116	27	9	0	-5.02582	6.70996e-05	0.00872106	down	NW_018743196.1	1256184	1260002	-	LOC110733038	--	--	--	uncharacterized protein LOC110733038 [Chenopodium quinoa]	--	SubName: Full=Uncharacterized protein {ECO:0000313|EMBL:KNA13915.1};	--	--	PF08450.12:SMP-30/Gluconolactonase/LRE-like region
gene-LOC110694697	39.21	32.01	34.7	2.5	0.57	0	1333	1036	967	84	18	0	-5.06984	6.77599e-05	0.00877165	down	NW_018744240.1	801573	805705	+	LOC110694697	--	K00475 naringenin 3-dioxygenase [EC:1.14.11.9] | (RefSeq) naringenin,2-oxoglutarate 3-dioxygenase-like (A)	ko00941: Flavonoid biosynthesis	naringenin,2-oxoglutarate 3-dioxygenase-like [Chenopodium quinoa]	RecName: Full=Naringenin,2-oxoglutarate 3-dioxygenase; EC=1.14.11.9 {ECO:0000250|UniProtKB:Q7XZQ7}; AltName: Full=FHT; AltName: Full=Flavanone-3-hydroxylase; Short=F3H;	SubName: Full=Uncharacterized protein {ECO:0000313|EMBL:KNA10570.1};	Iron/ascorbate family oxidoreductases	GO:0031418,L-ascorbic acid binding; GO:0046872,metal ion binding; GO:0045486,naringenin 3-dioxygenase activity; GO:0009813,flavonoid biosynthetic process	PF03171.20:2OG-Fe(II) oxygenase superfamily
novel.420	0	0.455764	8.10408	0	0	0	0	55	1036	0	0	0	-11.1578	6.88645e-05	0.00887914	down	NW_018742263.1	3392664	3394042	.	--	--	K01601 ribulose-bisphosphate carboxylase large chain [EC:4.1.1.39] | (RefSeq) uncharacterized protein LOC112271745 (A)	ko00630: Glyoxylate and dicarboxylate metabolism; ko00710: Carbon fixation in photosynthetic organisms; ko01200: Carbon metabolism	hypothetical protein LSAT_6X94260 [Lactuca sativa]	--	SubName: Full=Uncharacterized protein {ECO:0000313|EnsemblPlants:ORGLA08G0207700.1};	--	--	--
gene-LOC110726823	132.06	138.69	0	1.11	0.07	0.52	4356	4356	0	36	2	14	-7.22162	6.95601e-05	0.00893323	down	NW_018742881.1	1834839	1837233	-	LOC110726823	--	--	--	GDSL esterase/lipase At3g48460-like [Chenopodium quinoa]	RecName: Full=GDSL esterase/lipase At3g48460; EC=3.1.1.-; AltName: Full=Extracellular lipase At3g48460; Flags: Precursor;	SubName: Full=Uncharacterized protein {ECO:0000313|EMBL:KNA11402.1};	--	GO:0005576,extracellular region; GO:0008126,acetylesterase activity; GO:0006631,fatty acid metabolic process; GO:0016042,lipid catabolic process	PF00657.22:GDSL-like Lipase/Acylhydrolase
gene-LOC110706575	10.83	8.73	12.13	2.18	2.26	0.74	232	178	213	46	45	13	-2.62194	7.04224e-05	0.00900822	down	NW_018744988.1	1283930	1285110	+	LOC110706575	--	--	--	uncharacterized protein LOC110706575 [Chenopodium quinoa]	--	SubName: Full=Uncharacterized protein {ECO:0000313|EMBL:KNA22139.1};	--	--	--
gene-LOC110693599	38.3	36.13	28.25	10.64	3.82	2.83	1141	1025	690	313	106	69	-2.53218	7.10044e-05	0.00904692	down	NW_018744151.1	2951690	2955135	+	LOC110693599	--	--	--	CBS domain-containing protein CBSX5-like [Chenopodium quinoa]	RecName: Full=CBS domain-containing protein CBSX5;	SubName: Full=Uncharacterized protein {ECO:0000313|EMBL:KNA16798.1};	5'-AMP-activated protein kinase, gamma subunit	--	PF00571.28:CBS domain
gene-LOC110704464	34.29	35.68	14.94	5.18	4.61	0.95	879	871	314	131	110	20	-2.96641	7.15152e-05	0.00907626	down	NW_018744835.1	1319279	1321540	+	LOC110704464	--	K20628 expansin | (RefSeq) expansin-A8-like (A)	--	expansin-A8-like [Chenopodium quinoa]	RecName: Full=Expansin-A8; Short=AtEXPA8; AltName: Full=Alpha-expansin-8; Short=At-EXP8; Short=AtEx8; AltName: Full=Ath-ExpAlpha-1.11; Flags: Precursor;	SubName: Full=Uncharacterized protein {ECO:0000313|EMBL:KNA04067.1};	--	GO:0005618,cell wall; GO:0005576,extracellular region; GO:0016020,membrane; GO:0009664,plant-type cell wall organization; GO:0006949,syncytium formation	PF01357.21:Pollen allergen
novel.7423	4.97372	7.6856	0	0	0	0	373	545	0	0	0	0	-10.5533	7.19973e-05	0.00910176	down	NW_018745063.1	2541287	2542188	+	--	--	--	--	uncharacterized protein LOC110721183 [Chenopodium quinoa]	--	--	--	--	PF05622.12:HOOK protein
gene-LOC110725352	10.92	11.6	4.42	41.01	70.48	21.84	464	469	154	1720	2787	760	2.30637	7.52784e-05	0.00947952	up	NW_018742810.1	2527527	2532380	+	LOC110725352	--	--	--	WAT1-related protein At4g08300-like isoform X1 [Chenopodium quinoa]	RecName: Full=WAT1-related protein At4g08300;	RecName: Full=WAT1-related protein {ECO:0000256|RuleBase:RU363077};	--	GO:0016021,integral component of membrane; GO:0005886,plasma membrane; GO:0015171,amino acid transmembrane transporter activity; GO:0032973,amino acid export across plasma membrane; GO:0080144,amino acid homeostasis; GO:0043090,amino acid import	PF00892.20:EamA-like transporter family
gene-LOC110731573	28.4	27.22	18.5	47.14	60.85	72.57	1382	1261	738	2265	2756	2893	1.30635	7.62083e-05	0.00955941	up	NW_018743074.1	701894	705751	-	LOC110731573	--	K13430 serine/threonine-protein kinase PBS1 [EC:2.7.11.1] | (RefSeq) serine/threonine-protein kinase PBS1-like (A)	ko04626: Plant-pathogen interaction	probable serine/threonine-protein kinase At1g01540 [Chenopodium quinoa]	RecName: Full=Probable serine/threonine-protein kinase At1g01540; EC=2.7.11.1;	SubName: Full=Uncharacterized protein {ECO:0000313|EMBL:KNA19825.1};	Serine/threonine protein kinase	GO:0016021,integral component of membrane; GO:0005886,plasma membrane; GO:0005524,ATP binding; GO:0004674,protein serine/threonine kinase activity; GO:0004675,transmembrane receptor protein serine/threonine kinase activity; GO:0007166,cell surface receptor signaling pathway; GO:0046777,protein autophosphorylation; GO:0006468,protein phosphorylation	PF00069.25:Protein kinase domain
gene-LOC110707813	40.62	41.15	46.9	80.27	149.04	89.79	2112	2037	1999	4121	7213	3825	1.29545	7.66636e-05	0.0095794	up	NW_018745003.1	1792743	1800450	+	LOC110707813	--	K17471 sulfate transporter 3 | (RefSeq) probable sulfate transporter 3.5 (A)	--	probable sulfate transporter 3.5 [Chenopodium quinoa]	RecName: Full=Probable sulfate transporter 3.5;	SubName: Full=Uncharacterized protein {ECO:0000313|EMBL:KNA22166.1};	Sulfate/bicarbonate/oxalate exchanger SAT-1 and related transporters (SLC26 family)	GO:0005887,integral component of plasma membrane; GO:0008271,secondary active sulfate transmembrane transporter activity; GO:0015116,sulfate transmembrane transporter activity; GO:0015293,symporter activity	PF00916.20:Sulfate permease family
gene-LOC110729676	1.32	1.09	4.08	0.17	0.16	0.13	64	50	162	8	7	5	-3.87807	7.83745e-05	0.00975552	down	NW_018742987.1	1715934	1722821	-	LOC110729676	--	K15338 flap endonuclease GEN [EC:3.1.-.-] | (RefSeq) flap endonuclease GEN-like 2 isoform X1 (A)	--	flap endonuclease GEN-like 2 isoform X1 [Chenopodium quinoa]	RecName: Full=Flap endonuclease GEN-like 2; EC=3.1.-.-;	SubName: Full=Uncharacterized protein {ECO:0000313|EMBL:KNA23911.1};	5'-3' exonuclease	GO:0005634,nucleus; GO:0008821,crossover junction endodeoxyribonuclease activity; GO:0046872,metal ion binding; GO:0006281,DNA repair	PF00867.18:XPG I-region
gene-LOC110734432	11.99	11.86	1.93	1.17	0.39	0.69	635	598	84	61	19	30	-3.45144	7.916e-05	0.00978036	down	NW_018743212.1	3026590	3034187	+	LOC110734432	--	K11251 histone H2A | (RefSeq) probable histone H2A variant 3 (A)	--	probable histone H2A variant 3 [Chenopodium quinoa]	RecName: Full=Probable histone H2A variant 3;	RecName: Full=Histone H2A {ECO:0000256|RuleBase:RU003767};	Histone 2A	GO:0000790,nuclear chromatin; GO:0000786,nucleosome; GO:0003677,DNA binding; GO:0046982,protein heterodimerization activity; GO:0006342,chromatin silencing	PF00125.24:Core histone H2A/H2B/H3/H4
novel.8036	0	0	0	0.748433	0	1.60695	0	0	0	266	0	528	10.6435	7.91785e-05	0.00978036	up	NW_018745410.1	676944	680761	-	--	--	K19525 vacuolar protein sorting-associated protein 13A/C | (RefSeq) uncharacterized protein LOC110098611 (A)	--	RNA-directed DNA polymerase [Dendrobium catenatum]	RecName: Full=Uncharacterized mitochondrial protein AtMg00860; AltName: Full=ORF158;	SubName: Full=RNA-directed DNA polymerase {ECO:0000313|EMBL:PKU69610.1};	FOG: Transposon-encoded proteins with TYA, reverse transcriptase, integrase domains in various combinations	GO:0005739,mitochondrion	PF17917.1:RNase H-like domain found in reverse transcriptase
gene-LOC110683805	5.33	5.6	4.32	1.03	1.41	0.66	158	158	105	30	39	16	-2.29779	8.01987e-05	0.00984048	down	NW_018743691.1	3854915	3867319	-	LOC110683805	--	K10744 ribonuclease H2 subunit B | (RefSeq) ribonuclease H2 subunit B-like (A)	ko03030: DNA replication	ribonuclease H2 subunit B-like [Chenopodium quinoa]	--	SubName: Full=Uncharacterized protein {ECO:0000313|EMBL:KNA18643.1};	Uncharacterized conserved protein	GO:0005634,nucleus	PF09468.10:Ydr279p protein family (RNase H2 complex component) wHTH domain
gene-LOC110711441	12.98	14.01	1.41	0.63	0.04	0.44	788	810	70	38	2	22	-4.57866	8.02734e-05	0.00984048	down	NW_018745275.1	358615	364235	-	LOC110711441	--	K02542 DNA replication licensing factor MCM6 [EC:3.6.4.12] | (RefSeq) DNA replication licensing factor MCM6-like (A)	ko03030: DNA replication	DNA replication licensing factor MCM6-like [Chenopodium quinoa]	RecName: Full=DNA replication licensing factor MCM6; EC=3.6.4.12; AltName: Full=Minichromosome maintenance protein 6; Short=AtMCM6;	RecName: Full=DNA helicase {ECO:0000256|SAAS:SAAS00536514}; EC=3.6.4.12 {ECO:0000256|SAAS:SAAS00536514};	DNA replication licensing factor, MCM6 component	GO:0042555,MCM complex; GO:0000347,THO complex; GO:0005524,ATP binding; GO:0003677,DNA binding; GO:0003678,DNA helicase activity; GO:0046872,metal ion binding; GO:0007049,cell cycle; GO:0006270,DNA replication initiation; GO:0006268,DNA unwinding involved in DNA replication	PF00493.23:MCM P-loop domain
gene-LOC110731244	9.16	8.33	11.58	20.95	29.03	21.83	438	379	454	989	1292	855	1.29704	8.11296e-05	0.00990791	up	NW_018743066.1	720162	736664	-	LOC110731244	--	K14445 solute carrier family 13 (sodium-dependent dicarboxylate transporter), member 2/3/5 | (RefSeq) tonoplast dicarboxylate transporter-like (A)	--	tonoplast dicarboxylate transporter-like [Chenopodium quinoa]	RecName: Full=Tonoplast dicarboxylate transporter; Short=AttDT; AltName: Full=Sodium-dicarboxylate cotransporter-like; Short=AtSDAT; AltName: Full=Vacuolar malate transporter;	SubName: Full=Uncharacterized protein {ECO:0000313|EMBL:KNA24065.1};	Na+/dicarboxylate, Na+/tricarboxylate and phosphate transporters	GO:0016021,integral component of membrane; GO:0005774,vacuolar membrane; GO:0005773,vacuole; GO:0015140,malate transmembrane transporter activity; GO:0015743,malate transport; GO:0051453,regulation of intracellular pH; GO:0006814,sodium ion transport	PF00939.19:Sodium:sulfate symporter transmembrane region
gene-LOC110713878	10.47	11.29	9.64	19.47	31.87	40.59	514	528	388	944	1457	1633	1.56293	8.39492e-05	0.0102137	up	NW_018745454.1	1572451	1579781	-	LOC110713878	--	K13510 lysophosphatidylcholine acyltransferase / lyso-PAF acetyltransferase [EC:2.3.1.23 2.3.1.67] | (RefSeq) lysophospholipid acyltransferase LPEAT2-like (A)	ko00564: Glycerophospholipid metabolism; ko00565: Ether lipid metabolism	lysophospholipid acyltransferase LPEAT2-like [Chenopodium quinoa]	RecName: Full=Lysophospholipid acyltransferase LPEAT2; EC=2.3.1.25; AltName: Full=Lysophosphatidylethanolamine acyltransferase 2; Short=AtLPEAT2;	SubName: Full=Uncharacterized protein {ECO:0000313|EMBL:KNA15467.1};	Predicted phosphate acyltransferase, contains PlsC domain	GO:0016021,integral component of membrane; GO:0005509,calcium ion binding; GO:0071618,lysophosphatidylethanolamine acyltransferase activity; GO:0050200,plasmalogen synthase activity; GO:0008654,phospholipid biosynthetic process; GO:0006644,phospholipid metabolic process; GO:0000038,very long-chain fatty acid metabolic process	PF01553.21:Acyltransferase
gene-LOC110712596	1.13	2.33	4.15	0	0	0	24	47	72	0	0	0	-8.07075	8.55692e-05	0.0103718	down	NW_018742418.1	8173602	8175838	+	LOC110712596	--	K01166 ribonuclease T2 [EC:4.6.1.19] | (RefSeq) ribonuclease 1-like (A)	--	ribonuclease 1-like [Chenopodium quinoa]	RecName: Full=Ribonuclease 1; EC=3.1.27.1; Flags: Precursor;	SubName: Full=Uncharacterized protein {ECO:0000313|EMBL:KNA22870.1};	Ribonuclease, T2 family	GO:0005618,cell wall; GO:0005576,extracellular region; GO:0005886,plasma membrane; GO:0004540,ribonuclease activity; GO:0033897,ribonuclease T2 activity; GO:0003723,RNA binding; GO:0009718,anthocyanin-containing compound biosynthetic process; GO:0016036,cellular response to phosphate starvation; GO:0009611,response to wounding	PF00445.18:Ribonuclease T2 family
gene-LOC110703910	19.45	15.11	9.03	31.97	76.04	187.67	499	369	190	810	1816	3945	2.80376	8.60781e-05	0.0103946	up	NW_018742393.1	2458417	2459662	-	LOC110703910	--	--	--	uncharacterized protein LOC110703910 [Chenopodium quinoa]	--	SubName: Full=Uncharacterized protein {ECO:0000313|EMBL:KNA11767.1};	--	--	PF14009.6:Domain of unknown function (DUF4228)
gene-LOC110737657	8.37	8.16	7.01	2.19	2.06	1	236	219	162	61	54	23	-2.15639	8.72056e-05	0.0104916	down	NW_018743331.1	416583	423774	+	LOC110737657	--	--	--	uncharacterized protein LOC110737657 [Chenopodium quinoa]	--	SubName: Full=Uncharacterized protein {ECO:0000313|EMBL:KMS97230.1};	Uncharacterized conserved protein	GO:0003723,RNA binding	PF17774.1:Putative RNA-binding domain in YlmH
gene-LOC110706597	20.43	19.34	29	50.59	65.2	91.1	1189	1072	1384	2908	3533	4345	1.59321	8.75898e-05	0.0104988	up	NW_018744988.1	1613343	1616961	+	LOC110706597	--	K17550 protein phosphatase 1 regulatory subunit 7 | (RefSeq) protein phosphatase 1 regulatory subunit pprA-like (A)	--	uncharacterized protein LOC110706597 [Chenopodium quinoa]	RecName: Full=Dynein regulatory complex subunit 3; AltName: Full=Flagellar-associated protein 134;	SubName: Full=Uncharacterized protein {ECO:0000313|EMBL:KNA24602.1};	Protein phosphatase 1, regulatory subunit, and related proteins	GO:0005737,cytoplasm; GO:0005856,cytoskeleton; GO:0031514,motile cilium; GO:0060285,cilium-dependent cell motility	PF12799.7:Leucine Rich repeats (2 copies)
novel.8318	9.40306	6.82976	0	0	0	0	516	355	0	0	0	0	-10.4638	8.83242e-05	0.0105462	down	NW_018745521.1	32287	32887	.	--	--	--	--	PREDICTED: uncharacterized protein LOC104597159 [Nelumbo nucifera]	RecName: Full=Cyclin-dependent protein kinase inhibitor SMR4 {ECO:0000303|PubMed:17599908, ECO:0000303|PubMed:24399300, ECO:0000303|PubMed:26546445}; AltName: Full=Protein SIAMESE-RELATED 4 {ECO:0000303|PubMed:17599908, ECO:0000303|PubMed:24399300, ECO:0000303|PubMed:26546445};	SubName: Full=uncharacterized protein LOC104597159 {ECO:0000313|RefSeq:XP_010256881.1};	--	GO:0004860,protein kinase inhibitor activity; GO:0007049,cell cycle	--
gene-LOC110724401	455.86	432.96	545.03	963.29	1121.66	1628.95	5322	4813	5216	11105	12190	15582	1.38459	8.86374e-05	0.0105462	up	NW_018742763.1	1481726	1487236	-	LOC110724401	--	--	--	peamaclein-like [Chenopodium quinoa]	RecName: Full=Snakin-1; Flags: Precursor;	SubName: Full=Uncharacterized protein {ECO:0000313|EMBL:KZN00090.1};	--	GO:0005618,cell wall; GO:0005576,extracellular region; GO:0006952,defense response	PF02704.14:Gibberellin regulated protein
gene-LOC110705369	11.7	10.79	0	0.05	0.05	0	936	822	0	4	4	0	-7.71431	8.96444e-05	0.010627	down	NW_018744878.1	454561	463213	-	LOC110705369	--	K20718 LRR receptor-like serine/threonine-protein kinase ERECTA [EC:2.7.11.1] | (RefSeq) LRR receptor-like serine/threonine-protein kinase ERECTA (A)	ko04016: MAPK signaling pathway - plant	LRR receptor-like serine/threonine-protein kinase ERECTA [Chenopodium quinoa]	RecName: Full=LRR receptor-like serine/threonine-protein kinase ERECTA {ECO:0000303|PubMed:8624444}; EC=2.7.11.1; AltName: Full=Protein QUANTITATIVE RESISTANCE TO PLECTOSPHAERELLA 1; AltName: Full=Protein QUANTITATIVE RESISTANCE TO RALSTONIA SOLANACEARUM 1; AltName: Full=Protein TRANSPIRATION EFFICIENCY 1; Flags: Precursor;	SubName: Full=Uncharacterized protein {ECO:0000313|EMBL:KNA12611.1};	--	GO:0016021,integral component of membrane; GO:0005739,mitochondrion; GO:0005886,plasma membrane; GO:0005524,ATP binding; GO:0042277,peptide binding; GO:0004674,protein serine/threonine kinase activity; GO:0019199,transmembrane receptor protein kinase activity; GO:0070370,cellular heat acclimation; GO:0042742,defense response to bacterium; GO:0050832,defense response to fungus; GO:0048281,inflores…	PF13855.6:Leucine rich repeat
gene-LOC110689157	1.59	2	1.66	0.26	0.31	0.06	167	200	143	27	30	5	-3.07528	9.12988e-05	0.0107612	down	NW_018743955.1	1401768	1414589	-	LOC110689157	--	--	--	--	--	--	--	--	--
gene-LOC110719340	2.5	2.28	2.55	5.01	13.94	15.22	128	111	107	253	664	638	2.21854	9.14418e-05	0.0107612	up	NW_018742484.1	1404053	1407765	+	LOC110719340	--	K09843 (+)-abscisic acid 8'-hydroxylase [EC:1.14.14.137] | (RefSeq) abscisic acid 8'-hydroxylase 1-like (A)	ko00906: Carotenoid biosynthesis	abscisic acid 8'-hydroxylase 1-like [Chenopodium quinoa]	RecName: Full=Abscisic acid 8'-hydroxylase 1; Short=ABA 8'-hydroxylase 1; EC=1.14.13.93; AltName: Full=Cytochrome P450 707A1;	SubName: Full=Uncharacterized protein {ECO:0000313|EMBL:KNA20889.1};	Cytochrome P450 CYP4/CYP19/CYP26 subfamilies	GO:0016021,integral component of membrane; GO:0010295,(+)-abscisic acid 8'-hydroxylase activity; GO:0020037,heme binding; GO:0005506,iron ion binding; GO:0046345,abscisic acid catabolic process; GO:0016132,brassinosteroid biosynthetic process; GO:0010268,brassinosteroid homeostasis; GO:0016125,sterol metabolic process	PF00067.22:Cytochrome P450
gene-LOC110689657	67.33	69.85	14.86	2.44	0.1	0	2128	2102	385	76	3	0	-5.81375	9.29489e-05	0.0108989	down	NW_018743977.1	441326	445772	-	LOC110689657	--	--	--	GDSL esterase/lipase At4g28780-like [Chenopodium quinoa]	RecName: Full=GDSL esterase/lipase At4g28780; EC=3.1.1.-; AltName: Full=Extracellular lipase At4g28780; Flags: Precursor;	SubName: Full=Uncharacterized protein {ECO:0000313|EMBL:KNA14163.1};	--	GO:0005576,extracellular region; GO:0016788,hydrolase activity, acting on ester bonds; GO:0016042,lipid catabolic process	PF00657.22:GDSL-like Lipase/Acylhydrolase
gene-LOC110728340	3	2.28	2.75	7.08	13.48	7.82	109	79	82	254	456	233	1.80829	9.44122e-05	0.0110306	up	NW_018742924.1	1168389	1182634	-	LOC110728340	--	K16302 metal transporter CNNM | (RefSeq) DUF21 domain-containing protein At1g47330-like (A)	--	DUF21 domain-containing protein At1g47330-like [Chenopodium quinoa]	RecName: Full=DUF21 domain-containing protein At1g47330; AltName: Full=CBS domain-containing protein CBSDUF7;	SubName: Full=Uncharacterized protein {ECO:0000313|EMBL:KNA24481.1};	Predicted membrane protein, contains two CBS domains	GO:0016021,integral component of membrane; GO:0005886,plasma membrane	PF01595.20:Cyclin M transmembrane N-terminal domain
novel.2779	0	0	0	0.351393	0.583513	1.14144	0	0	0	24	41	72	8.04784	9.65077e-05	0.0111941	up	NW_018743136.1	2495889	2496622	.	--	--	--	--	--	--	--	--	--	--
gene-LOC110732609	10.63	10.32	0	0	0	0	437	404	0	0	0	0	-10.4186	9.68309e-05	0.0111941	down	NW_018743175.1	4412085	4416972	-	LOC110732609	--	K00815 tyrosine aminotransferase [EC:2.6.1.5] | (RefSeq) probable aminotransferase TAT2 (A)	ko00130: Ubiquinone and other terpenoid-quinone biosynthesis; ko00270: Cysteine and methionine metabolism; ko00350: Tyrosine metabolism; ko00360: Phenylalanine metabolism; ko00400: Phenylalanine, tyrosine and tryptophan biosynthesis; ko00950: Isoquinoline alkaloid biosynthesis; ko00960: Tropane, piperidine and pyridine alkaloid biosynthesis	probable aminotransferase TAT2 [Chenopodium quinoa]	RecName: Full=Probable aminotransferase TAT2; EC=2.6.1.-; AltName: Full=Tyrosine aminotransferase 2;	SubName: Full=Uncharacterized protein {ECO:0000313|EMBL:KNA04212.1};	Tyrosine aminotransferase	GO:0005829,cytosol; GO:0004838,L-tyrosine:2-oxoglutarate aminotransferase activity; GO:0030170,pyridoxal phosphate binding; GO:0006572,tyrosine catabolic process; GO:0010189,vitamin E biosynthetic process	PF00155.21:Aminotransferase class I and II
gene-LOC110715674	5.7	5.72	3.91	9.66	19.36	14.4	436	417	245	730	1379	903	1.50477	9.68497e-05	0.0111941	up	NW_018745523.1	3470251	3490168	-	LOC110715674	--	K13430 serine/threonine-protein kinase PBS1 [EC:2.7.11.1] | (RefSeq) probable serine/threonine-protein kinase PBL7 (A)	ko04626: Plant-pathogen interaction	putative leucine-rich repeat receptor-like serine/threonine-protein kinase At2g19230 isoform X1 [Chenopodium quinoa]	RecName: Full=Putative leucine-rich repeat receptor-like serine/threonine-protein kinase At2g19230; EC=2.7.11.1; Flags: Precursor;	SubName: Full=Uncharacterized protein {ECO:0000313|EMBL:GAY56427.1};	--	GO:0016021,integral component of membrane; GO:0005886,plasma membrane; GO:0005524,ATP binding; GO:0004674,protein serine/threonine kinase activity	PF12819.7:Malectin-like domain
novel.6561	2.59669	2.24328	1.78337	4.96937	6.03349	4.15339	230	188	161	448	560	346	1.24594	9.90699e-05	0.0113695	up	NW_018744718.1	203528	204719	-	--	--	--	--	--	--	--	--	--	--
gene-LOC110739667	67.54	71.61	41.79	308.72	347.44	100.29	1883	1901	955	8499	9017	2291	2.06663	0.000103778	0.0118259	up	NW_018743510.1	830265	832576	+	LOC110739667	--	K15382 solute carrier family 50 (sugar transporter) | (RefSeq) bidirectional sugar transporter SWEET12-like (A)	--	bidirectional sugar transporter SWEET12-like [Chenopodium quinoa]	RecName: Full=Bidirectional sugar transporter SWEET14; Short=OsSWEET14;	RecName: Full=Bidirectional sugar transporter SWEET {ECO:0000256|RuleBase:RU910715};	Multitransmembrane protein	GO:0005887,integral component of plasma membrane; GO:0008515,sucrose transmembrane transporter activity; GO:0051119,sugar transmembrane transporter activity	PF03083.16:Sugar efflux transporter for intercellular exchange
gene-LOC110730303	0.38	0.53	0	10.91	4.25	6.47	9	12	0	256	94	126	4.63313	0.000107624	0.0122212	up	NW_018743021.1	2908110	2910632	-	LOC110730303	--	K20628 expansin | (RefSeq) expansin-B3-like (A)	--	expansin-like B1 [Chenopodium quinoa]	RecName: Full=Expansin-like B1; Short=At-EXPR1; Short=AtEXLB1; Short=AtEXPR1; AltName: Full=Ath-ExpBeta-3.1; Flags: Precursor;	SubName: Full=Uncharacterized protein {ECO:0000313|EMBL:KNA15527.1};	--	GO:0005576,extracellular region; GO:0019953,sexual reproduction	PF01357.21:Pollen allergen
gene-LOC110711537	0.11	0	0	1.52	5.14	4.55	2	0	0	27	86	67	6.604	0.000109123	0.0123481	up	NW_018745281.1	1144220	1145092	+	LOC110711537	--	--	--	uncharacterized protein LOC110711537 [Chenopodium quinoa]	--	SubName: Full=Uncharacterized protein {ECO:0000313|EMBL:KNA25451.1};	--	GO:0008080,N-acetyltransferase activity	PF13302.7:Acetyltransferase (GNAT) domain
gene-LOC110734310	34.2	41.6	23.63	113.33	80.79	257.97	588	681	333	1924	1293	3634	2.23529	0.000110262	0.0124335	up	NW_018743212.1	1385152	1386478	+	LOC110734310	--	--	--	universal stress protein PHOS32-like [Chenopodium quinoa]	RecName: Full=Universal stress protein A-like protein;	SubName: Full=Uncharacterized protein {ECO:0000313|EMBL:PIN06637.1};	--	GO:0005886,plasma membrane; GO:0016208,AMP binding; GO:0006950,response to stress	PF00582.26:Universal stress protein family
gene-LOC110684678	3.45	2.96	3.23	8.07	10.76	6.84	160	131	123	370	465	260	1.41048	0.000119963	0.0134805	up	NW_018743732.1	568073	570942	+	LOC110684678	--	--	--	pentatricopeptide repeat-containing protein At2g30100, chloroplastic-like [Chenopodium quinoa]	RecName: Full=Pentatricopeptide repeat-containing protein At2g30100, chloroplastic; Flags: Precursor;	SubName: Full=Uncharacterized protein {ECO:0000313|EMBL:KNA13970.1};	--	GO:0009507,chloroplast; GO:0043231,intracellular membrane-bounded organelle; GO:0004519,endonuclease activity; GO:0003723,RNA binding; GO:0009451,RNA modification	PF13041.6:PPR repeat family
gene-LOC110709263	16.34	17.11	16.06	40.24	61.41	28.67	701	699	565	1705	2453	1008	1.38584	0.00012159	0.0135623	up	NW_018745063.1	2517978	2523046	+	LOC110709263	--	--	--	sulfite exporter TauE/SafE family protein 4-like [Chenopodium quinoa]	RecName: Full=Sulfite exporter TauE/SafE family protein 4 {ECO:0000312|EMBL:AEC09275.1};	SubName: Full=Uncharacterized protein {ECO:0000313|EMBL:KNA13303.1};	--	GO:0016021,integral component of membrane	PF01925.19:Sulfite exporter TauE/SafE
novel.1345	0.046987	0.074446	0	0.684039	0.922814	0.697102	8	12	0	119	165	112	4.42183	0.000121888	0.0135623	up	NW_018742577.1	203585	205450	.	--	--	--	--	uncharacterized protein LOC110715993 [Chenopodium quinoa]	--	SubName: Full=Uncharacterized protein {ECO:0000313|EMBL:KNA20256.1}; Flags: Fragment;	--	GO:0016021,integral component of membrane; GO:0005524,ATP binding; GO:0016887,ATPase activity; GO:0003676,nucleic acid binding	--
gene-LOC110714637	31.28	31.68	27.23	56.03	56.43	67.82	782	754	558	1383	1313	1389	1.01813	0.000121949	0.0135623	up	NW_018745454.1	2763612	2766151	-	LOC110714637	--	--	--	--	--	--	--	--	--
gene-LOC110737963	9.94	8.44	9.92	21.48	35.91	18.32	542	438	443	1156	1822	818	1.4057	0.000123022	0.0136348	up	NW_018743332.1	389889	415723	-	LOC110737963	--	K21867 potassium channel | (RefSeq) potassium channel AKT2/3-like (A)	--	potassium channel AKT2/3-like [Chenopodium quinoa]	RecName: Full=Potassium channel AKT2/3;	SubName: Full=Uncharacterized protein {ECO:0000313|EMBL:KNA12144.1}; Flags: Fragment;	K+-channel ERG and related proteins, contain PAS/PAC sensor domain	GO:0005789,endoplasmic reticulum membrane; GO:0005887,integral component of plasma membrane; GO:0009506,plasmodesma; GO:0042802,identical protein binding; GO:0005249,voltage-gated potassium channel activity; GO:0034765,regulation of ion transmembrane transport; GO:0042391,regulation of membrane potential; GO:0009737,response to abscisic acid	PF00520.31:Ion transport protein
gene-LOC110702539	13.12	9.93	10.36	23.63	25.37	27.21	326	235	211	580	587	554	1.20455	0.000124199	0.0137182	up	NW_018744693.1	2047526	2049503	+	LOC110702539	--	K12260 sulfiredoxin [EC:1.8.98.2] | (RefSeq) sulfiredoxin, chloroplastic/mitochondrial-like (A)	--	sulfiredoxin, chloroplastic/mitochondrial-like [Chenopodium quinoa]	RecName: Full=Sulfiredoxin, chloroplastic/mitochondrial; Short=AtSRX; EC=1.8.98.2; Flags: Precursor;	SubName: Full=Uncharacterized protein {ECO:0000313|EMBL:KNA21839.1};	Predicted transcription regulator/nuclease, contains ParB domain	GO:0009507,chloroplast; GO:0005739,mitochondrion; GO:0005524,ATP binding; GO:0032542,sulfiredoxin activity; GO:0034599,cellular response to oxidative stress	PF02195.18:ParB-like nuclease domain
gene-LOC110715013	32.64	35.15	3.71	1.17	0.82	0	1191	1221	111	42	28	0	-5.1301	0.00012475	0.0137322	down	NW_018745461.1	608443	613896	-	LOC110715013	--	K13065 shikimate O-hydroxycinnamoyltransferase [EC:2.3.1.133] | (RefSeq) anthranilate N-benzoyltransferase protein 2-like (A)	ko00940: Phenylpropanoid biosynthesis; ko00941: Flavonoid biosynthesis; ko00945: Stilbenoid, diarylheptanoid and gingerol biosynthesis	protein ECERIFERUM 26-like [Chenopodium quinoa]	RecName: Full=Protein ECERIFERUM 26; AltName: Full=CER2-like protein 1; Short=CER2-like1;	SubName: Full=Uncharacterized protein {ECO:0000313|EMBL:KNA08436.1};	--	GO:0005829,cytosol; GO:0016747,transferase activity, transferring acyl groups other than amino-acyl groups; GO:0071555,cell wall organization; GO:0042761,very long-chain fatty acid biosynthetic process; GO:0010025,wax biosynthetic process	PF02458.15:Transferase family
gene-LOC110704624	6.29	5.73	6.63	20.29	46.8	13.08	332	288	287	1058	2300	566	2.07027	0.000125811	0.0138021	up	NW_018744855.1	450769	457535	-	LOC110704624	--	K14638 solute carrier family 15 (peptide/histidine transporter), member 3/4 | (RefSeq) protein NRT1/ PTR FAMILY 8.3-like (A)	--	protein NRT1/ PTR FAMILY 6.3-like [Chenopodium quinoa]	RecName: Full=Protein NRT1/ PTR FAMILY 6.3; Short=AtNPF6.3; AltName: Full=Nitrate transporter 1.1; Short=AtNRT1; AltName: Full=Nitrate/chlorate transporter; AltName: Full=Protein CHLORINA 1;	SubName: Full=Uncharacterized protein {ECO:0000313|EMBL:KNA08422.1};	H+/oligopeptide symporter	GO:0016021,integral component of membrane; GO:0005886,plasma membrane; GO:0015112,nitrate transmembrane transporter activity; GO:0015293,symporter activity; GO:0009734,auxin-activated signaling pathway; GO:0042128,nitrate assimilation; GO:0015706,nitrate transport; GO:0006857,oligopeptide transport; GO:0009635,response to herbicide; GO:0010167,response to nitrate; GO:0009414,response to water dep…	PF00854.21:POT family
gene-LOC110702607	8.64	10.66	4.53	24.48	29.79	37.82	114	134	49	319	366	409	1.97955	0.000129525	0.0141025	up	NW_018742204.1	3855458	3856499	+	LOC110702607	--	--	--	--	--	--	--	--	--
gene-LOC110731880	0.54	0.98	5.55	0.03	0	0	17	29	142	1	0	0	-7.59154	0.000130187	0.0141025	down	NW_018743099.1	2337450	2340155	-	LOC110731880	--	K00915 inositol-polyphosphate multikinase [EC:2.7.1.140 2.7.1.151] | (RefSeq) inositol polyphosphate multikinase alpha-like isoform X1 (A)	ko00562: Inositol phosphate metabolism; ko04070: Phosphatidylinositol signaling system	inositol polyphosphate multikinase alpha-like isoform X1 [Chenopodium quinoa]	RecName: Full=Inositol polyphosphate multikinase beta; EC=2.7.1.140; EC=2.7.1.151; AltName: Full=Inositol polyphosphate 6-/3-/5-kinase beta; Short=AtIpk2-beta; Short=AtIpk2beta;	RecName: Full=Inositol polyphosphate multikinase {ECO:0000256|RuleBase:RU363090}; EC=2.7.1.140 {ECO:0000256|RuleBase:RU363090}; EC=2.7.1.151 {ECO:0000256|RuleBase:RU363090};	Inositol polyphosphate multikinase, component of the ARGR transcription regulatory complex	GO:0005634,nucleus; GO:0090406,pollen tube; GO:0005524,ATP binding; GO:0000824,inositol tetrakisphosphate 3-kinase activity; GO:0047326,inositol tetrakisphosphate 5-kinase activity; GO:0051765,inositol tetrakisphosphate kinase activity; GO:0051766,inositol trisphosphate kinase activity; GO:0052725,inositol-1,3,4-trisphosphate 6-kinase activity; GO:0000823,inositol-1,4,5-trisphosphate 6-kinase act…	PF03770.16:Inositol polyphosphate kinase
novel.2927	0.793769	0.475067	0.152061	1.75915	2.7099	2.05115	237	134	47	534	848	577	2.33002	0.000130292	0.0141025	up	NW_018743199.1	3020175	3022196	-	--	--	--	--	--	--	--	--	--	--
gene-LOC110684167	3.29	4.65	7.45	0.67	0.54	1.16	145	195	269	29	22	42	-2.69414	0.000133917	0.0144286	down	NW_018743697.1	2225917	2228914	-	LOC110684167	--	K13691 pathogen-inducible salicylic acid glucosyltransferase [EC:2.4.1.-] | (RefSeq) UDP-glycosyltransferase 74F2-like (A)	--	UDP-glycosyltransferase 87A1-like [Chenopodium quinoa]	RecName: Full=UDP-glycosyltransferase 87A1; EC=2.4.1.-;	SubName: Full=Uncharacterized protein {ECO:0000313|EMBL:KNA13093.1};	UDP-glucuronosyl and UDP-glucosyl transferase	GO:0043231,intracellular membrane-bounded organelle; GO:0080043,quercetin 3-O-glucosyltransferase activity; GO:0080044,quercetin 7-O-glucosyltransferase activity; GO:0008152,metabolic process	PF00201.18:UDP-glucoronosyl and UDP-glucosyl transferase
gene-LOC110686437	11.43	14.4	7.51	2.23	1.65	3.11	260	312	140	50	35	58	-2.21583	0.000135607	0.0145319	down	NW_018743858.1	4686862	4690561	-	LOC110686437	--	--	--	nucleolar and coiled-body phosphoprotein 1-like isoform X1 [Chenopodium quinoa]	--	SubName: Full=Uncharacterized protein {ECO:0000313|EMBL:KNA07222.1};	--	--	--
gene-LOC110735176	41.96	35.68	40.66	19.43	12.9	11.08	1765	1429	1402	807	505	382	-1.42967	0.000137279	0.0146626	down	NW_018743252.1	8732054	8741074	+	LOC110735176	--	K17732 mitochondrial-processing peptidase subunit beta [EC:3.4.24.64] | (RefSeq) probable mitochondrial-processing peptidase subunit beta, mitochondrial (A)	--	probable mitochondrial-processing peptidase subunit beta, mitochondrial [Chenopodium quinoa]	RecName: Full=Probable mitochondrial-processing peptidase subunit beta, mitochondrial; EC=3.4.24.64; AltName: Full=Beta-MPP; Flags: Precursor;	SubName: Full=Uncharacterized protein {ECO:0000313|EMBL:KNA21598.1};	Mitochondrial processing peptidase, beta subunit, and related enzymes (insulinase superfamily)	GO:0005618,cell wall; GO:0009507,chloroplast; GO:0016020,membrane; GO:0005743,mitochondrial inner membrane; GO:0005758,mitochondrial intermembrane space; GO:0005759,mitochondrial matrix; GO:0005741,mitochondrial outer membrane; GO:0005750,mitochondrial respiratory chain complex III; GO:0005739,mitochondrion; GO:0005730,nucleolus; GO:0005774,vacuolar membrane; GO:0004222,metalloendopeptidase activ…	PF00675.20:Insulinase (Peptidase family M16)
gene-LOC110728599	11.47	9.72	0.68	0.51	0.07	0.39	746	602	36	33	4	21	-4.39557	0.000138731	0.0147689	down	NW_018742951.1	7089897	7097261	-	LOC110728599	--	K02541 DNA replication licensing factor MCM3 [EC:3.6.4.12] | (RefSeq) DNA replication licensing factor MCM3 homolog 2-like (A)	ko03030: DNA replication	DNA replication licensing factor MCM3 homolog 2-like [Chenopodium quinoa]	RecName: Full=DNA replication licensing factor MCM3 homolog 1; EC=3.6.4.12; AltName: Full=Replication origin activator 1; Short=ROA-1;	RecName: Full=DNA helicase {ECO:0000256|SAAS:SAAS00536514}; EC=3.6.4.12 {ECO:0000256|SAAS:SAAS00536514};	DNA replication licensing factor, MCM3 component	GO:0042555,MCM complex; GO:0005634,nucleus; GO:0005524,ATP binding; GO:0003677,DNA binding; GO:0004386,helicase activity; GO:0007049,cell cycle; GO:0006270,DNA replication initiation	PF00493.23:MCM P-loop domain
gene-LOC110688274	9.22	8.91	7.82	19.1	18.34	27.75	440	405	306	900	815	1085	1.35316	0.000140631	0.0149221	up	NW_018743920.1	7126786	7129616	+	LOC110688274	--	K03320 ammonium transporter, Amt family | (RefSeq) ammonium transporter 1 member 3-like isoform X1 (A)	--	ammonium transporter 1 member 3-like isoform X1 [Chenopodium quinoa]	RecName: Full=Ammonium transporter 1 member 3; AltName: Full=LeAMT1;3;	RecName: Full=Ammonium transporter {ECO:0000256|RuleBase:RU362002};	Ammonia permease	GO:0005887,integral component of plasma membrane; GO:0008519,ammonium transmembrane transporter activity; GO:0072488,ammonium transmembrane transport; GO:0015696,ammonium transport; GO:0015695,organic cation transport	PF00909.21:Ammonium Transporter Family
novel.2837	7.33407	7.01619	3.596	12.153	20.1571	37.313	1165	1055	580	1966	3358	5580	2.08973	0.000142132	0.0150321	up	NW_018743175.1	3741627	3743366	-	--	--	--	--	hypothetical protein BVRB_5g125770 [Beta vulgaris subsp. vulgaris]	--	SubName: Full=Uncharacterized protein {ECO:0000313|EMBL:KMS97608.1};	--	--	--
gene-LOC110723886	10.21	9.51	10.16	18.69	25.44	30.86	381	338	311	689	884	944	1.33792	0.000143128	0.0150831	up	NW_018742733.1	3340331	3344264	-	LOC110723886	--	K18207 protein O-mannose beta-1,4-N-acetylglucosaminyltransferase [EC:2.4.1.312] | (RefSeq) protein O-linked-mannose beta-1,4-N-acetylglucosaminyltransferase 2-like (A)	ko00515: Mannose type O-glycan biosynthesis	protein O-linked-mannose beta-1,4-N-acetylglucosaminyltransferase 2-like [Chenopodium quinoa]	--	SubName: Full=Uncharacterized protein {ECO:0000313|EMBL:KNA12727.1};	Uncharacterized conserved protein	GO:0016021,integral component of membrane; GO:0016757,transferase activity, transferring glycosyl groups	PF04577.14:Protein of unknown function (DUF563)
gene-LOC110727802	10.49	11.65	0	0	0	0	365	386	0	0	0	0	-10.2578	0.000143547	0.0150831	down	NW_018742914.1	8645436	8647125	-	LOC110727802	--	--	--	--	--	--	--	--	--
gene-LOC110697818	98.73	95.76	120.11	48.41	48.73	28.66	2838	2621	2830	1374	1304	675	-1.32584	0.000145413	0.0152298	down	NW_018742381.1	256444	259369	-	LOC110697818	--	K13379 reversibly glycosylated polypeptide / UDP-arabinopyranose mutase [EC:2.4.1.- 5.4.99.30] | (RefSeq) UDP-arabinopyranose mutase 1 (A)	ko00520: Amino sugar and nucleotide sugar metabolism	UDP-arabinopyranose mutase 1 [Chenopodium quinoa]	RecName: Full=UDP-arabinopyranose mutase 1 {ECO:0000303|PubMed:17182701}; Short=OsUAM1 {ECO:0000303|PubMed:17182701}; EC=5.4.99.30 {ECO:0000269|PubMed:17182701, ECO:0000269|PubMed:20057139, ECO:0000269|PubMed:20149347}; AltName: Full=Reversibly glycosylated polypeptide 1 {ECO:0000303|PubMed:17182701}; AltName: Full=UDP-L-arabinose mutase 1 {ECO:0000305};	SubName: Full=Uncharacterized protein {ECO:0000313|EMBL:KNA14982.1};	--	GO:0005829,cytosol; GO:0005794,Golgi apparatus; GO:0016866,intramolecular transferase activity; GO:0052691,UDP-arabinopyranose mutase activity; GO:0071555,cell wall organization; GO:0009832,plant-type cell wall biogenesis; GO:0033356,UDP-L-arabinose metabolic process	PF03214.13:Reversibly glycosylated polypeptide
gene-LOC110715980	36.47	37.12	24.08	55.91	116.6	97.77	1103	1069	597	1670	3283	2423	1.47491	0.000146662	0.015311	up	NW_018745533.1	1395042	1401807	-	LOC110715980	--	K01366 cathepsin H [EC:3.4.22.16] | (RefSeq) thiol protease aleurain-like (A)	--	thiol protease aleurain-like [Chenopodium quinoa]	RecName: Full=Thiol protease aleurain-like; EC=3.4.22.16; Flags: Precursor;	SubName: Full=Uncharacterized protein {ECO:0000313|EMBL:KNA13820.1};	Cysteine proteinase Cathepsin L	GO:0005615,extracellular space; GO:0005764,lysosome; GO:0004197,cysteine-type endopeptidase activity; GO:0006955,immune response; GO:0051603,proteolysis involved in cellular protein catabolic process	PF00112.23:Papain family cysteine protease
novel.2199	0	0	0	0	4.00322	2.91915	0	0	0	0	414	271	10.31	0.000149159	0.0154888	up	NW_018742914.1	1968434	1969575	-	--	--	--	--	uncharacterized protein LOC110701798 [Chenopodium quinoa]	--	SubName: Full=Uncharacterized protein {ECO:0000313|EMBL:CCA66054.1};	--	GO:0003676,nucleic acid binding	--
gene-LOC110718815	38.47	51.25	3.66	3.5	1.05	0.63	667	846	52	60	17	9	-4.09617	0.000149322	0.0154888	down	NW_018742461.1	3710128	3711703	-	LOC110718815	--	--	--	uncharacterized protein LOC110718815 [Chenopodium quinoa]	RecName: Full=Basic secretory protease {ECO:0000303|PubMed:22773449}; EC=3.4.24.- {ECO:0000269|PubMed:22773449}; AltName: Full=Boswellia basic secretory protease {ECO:0000303|PubMed:22773449}; Short=BBSP {ECO:0000303|PubMed:22773449}; Flags: Fragments;	SubName: Full=Uncharacterized protein {ECO:0000313|EMBL:KNA12593.1};	--	GO:0046872,metal ion binding; GO:0008237,metallopeptidase activity	PF04450.12:Peptidase of plants and bacteria
novel.3278	0.948846	1.1783	2.25652	0.060718	0.119301	0	122	143	294	8	16	0	-4.7053	0.000149889	0.0154979	down	NW_018743292.1	4527748	4529148	-	--	--	--	--	--	--	--	--	--	--
gene-LOC110714576	32.34	32.2	17.4	11.17	8.3	7.74	1331	1262	587	454	318	261	-1.55851	0.000150885	0.0155398	down	NW_018745454.1	5937377	5942496	-	LOC110714576	--	K00627 pyruvate dehydrogenase E2 component (dihydrolipoamide acetyltransferase) [EC:2.3.1.12] | (RefSeq) dihydrolipoyllysine-residue acetyltransferase component 5 of pyruvate dehydrogenase complex, chloroplastic-like (A)	ko00010: Glycolysis / Gluconeogenesis; ko00020: Citrate cycle (TCA cycle); ko00620: Pyruvate metabolism; ko01200: Carbon metabolism	dihydrolipoyllysine-residue acetyltransferase component 5 of pyruvate dehydrogenase complex, chloroplastic-like [Chenopodium quinoa]	RecName: Full=Dihydrolipoyllysine-residue acetyltransferase component 5 of pyruvate dehydrogenase complex, chloroplastic; EC=2.3.1.12; AltName: Full=Dihydrolipoamide S-acetyltransferase component 5 of pyruvate dehydrogenase complex; AltName: Full=Protein EMBRYO DEFECTIVE 3003; AltName: Full=Pyruvate dehydrogenase complex component E2 5; Short=PDC-E2 5; Short=PDCE2 5; Flags: Precursor;	RecName: Full=Dihydrolipoamide acetyltransferase component of pyruvate dehydrogenase complex {ECO:0000256|RuleBase:RU003423}; EC=2.3.1.- {ECO:0000256|RuleBase:RU003423};	Dihydrolipoamide acetyltransferase	GO:0009507,chloroplast; GO:0009941,chloroplast envelope; GO:0009570,chloroplast stroma; GO:0022626,cytosolic ribosome; GO:0005886,plasma membrane; GO:0004742,dihydrolipoyllysine-residue acetyltransferase activity; GO:0019904,protein domain specific binding; GO:0006096,glycolytic process	PF00198.23:2-oxoacid dehydrogenases acyltransferase (catalytic domain)
gene-LOC110708120	71.8	55.64	0	0.46	0.2	0	1579	1165	0	10	4	0	-7.535	0.000151254	0.0155398	down	NW_018745003.1	1759182	1760249	+	LOC110708120	--	--	--	--	--	--	--	--	--
gene-LOC110722223	111.66	112.04	80.3	53.62	54.69	41.27	3520	3363	2075	1669	1605	1066	-1.00796	0.000153104	0.0156801	down	NW_018742656.1	336056	339158	+	LOC110722223	--	K13379 reversibly glycosylated polypeptide / UDP-arabinopyranose mutase [EC:2.4.1.- 5.4.99.30] | (RefSeq) alpha-1,4-glucan-protein synthase [UDP-forming] 2 (A)	ko00520: Amino sugar and nucleotide sugar metabolism	alpha-1,4-glucan-protein synthase [UDP-forming]	RecName: Full=Probable UDP-arabinopyranose mutase 2 {ECO:0000305}; EC=5.4.99.30 {ECO:0000250|UniProtKB:Q8H8T0}; AltName: Full=Reversibly glycosylated polypeptide 2 {ECO:0000303|PubMed:10580281}; Short=RGP2 {ECO:0000303|PubMed:10580281}; AltName: Full=UDP-L-arabinose mutase 2 {ECO:0000305}; AltName: Full=UDP-glucose:protein transglucosylase 2 {ECO:0000303|PubMed:10580281}; Short=UPTG 2 {ECO:000030…	SubName: Full=Uncharacterized protein {ECO:0000313|EMBL:KNA14982.1};	--	GO:0005618,cell wall; GO:0005576,extracellular region; GO:0005794,Golgi apparatus; GO:0009506,plasmodesma; GO:0052691,UDP-arabinopyranose mutase activity; GO:0071555,cell wall organization; GO:0030244,cellulose biosynthetic process; GO:0071669,plant-type cell wall organization or biogenesis; GO:0006486,protein glycosylation	PF03214.13:Reversibly glycosylated polypeptide
gene-LOC110718862	152.37	141.56	119.86	247.79	257.15	331.69	3128	2767	2017	5023	4914	5579	1.03764	0.000157161	0.0160448	up	NW_018742461.1	4310044	4313752	+	LOC110718862	--	K02155 V-type H+-transporting ATPase 16kDa proteolipid subunit | (RefSeq) V-type proton ATPase 16 kDa proteolipid subunit (A)	ko00190: Oxidative phosphorylation; ko04145: Phagosome	V-type proton ATPase 16 kDa proteolipid subunit [Chenopodium quinoa]	RecName: Full=V-type proton ATPase 16 kDa proteolipid subunit; Short=V-ATPase 16 kDa proteolipid subunit; AltName: Full=Vacuolar proton pump 16 kDa proteolipid subunit;	RecName: Full=V-type proton ATPase proteolipid subunit {ECO:0000256|RuleBase:RU363060};	Vacuolar H+-ATPase V0 sector, subunits c/c'	GO:0016021,integral component of membrane; GO:0033179,proton-transporting V-type ATPase, V0 domain; GO:0005774,vacuolar membrane; GO:0015078,proton transmembrane transporter activity; GO:0015991,ATP hydrolysis coupled proton transport	PF00137.21:ATP synthase subunit C
gene-LOC110729144	34.19	34.64	107.59	11.49	9.93	13.32	1106	1067	2853	367	299	353	-2.35969	0.000158051	0.0160849	down	NW_018742969.1	1030756	1032778	+	LOC110729144	--	--	--	zinc finger Ran-binding domain-containing protein 2-like [Chenopodium quinoa]	RecName: Full=RanBP2-type zinc finger protein At1g67325;	SubName: Full=Uncharacterized protein {ECO:0000313|EMBL:KNA15813.1};	RNA-binding Ran Zn-finger protein and related proteins	GO:0046872,metal ion binding; GO:0003729,mRNA binding	PF00641.18:Zn-finger in Ran binding protein and others
gene-LOC110728719	19.8	18.57	11.99	34.79	39.83	51.69	822	734	408	1426	1539	1758	1.35327	0.0001592	0.016151	up	NW_018742959.1	37622	42314	+	LOC110728719	--	K13811 3'-phosphoadenosine 5'-phosphosulfate synthase [EC:2.7.7.4 2.7.1.25] | (RefSeq) ATP sulfurylase 1, chloroplastic-like (A)	ko00230: Purine metabolism; ko00261: Monobactam biosynthesis; ko00450: Selenocompound metabolism; ko00920: Sulfur metabolism	ATP sulfurylase 1, chloroplastic-like [Chenopodium quinoa]	RecName: Full=ATP sulfurylase 1, chloroplastic; Short=AtPS1; EC=2.7.7.4; Flags: Precursor;	SubName: Full=Uncharacterized protein {ECO:0000313|EMBL:KNA08144.1};	ATP sulfurylase (sulfate adenylyltransferase)	GO:0009507,chloroplast; GO:0009570,chloroplast stroma; GO:0005886,plasma membrane; GO:0004020,adenylylsulfate kinase activity; GO:0005524,ATP binding; GO:0004781,sulfate adenylyltransferase (ATP) activity; GO:0070814,hydrogen sulfide biosynthetic process; GO:0046686,response to cadmium ion; GO:0009735,response to cytokinin; GO:0001887,selenium compound metabolic process; GO:0000103,sulfate assimi…	PF01747.17:ATP-sulfurylase
gene-LOC110690555	7.73	8.1	3.25	0.51	0.08	0	508	507	175	33	5	0	-4.94568	0.00016309	0.016494	down	NW_018742329.1	4168010	4176004	+	LOC110690555	--	K02541 DNA replication licensing factor MCM3 [EC:3.6.4.12] | (RefSeq) DNA replication licensing factor MCM3 homolog 2-like (A)	ko03030: DNA replication	DNA replication licensing factor MCM3 homolog 2-like [Chenopodium quinoa]	RecName: Full=DNA replication licensing factor MCM3 homolog 1; EC=3.6.4.12; AltName: Full=Replication origin activator 1; Short=ROA-1;	RecName: Full=DNA helicase {ECO:0000256|SAAS:SAAS00536514}; EC=3.6.4.12 {ECO:0000256|SAAS:SAAS00536514};	DNA replication licensing factor, MCM3 component	GO:0042555,MCM complex; GO:0005634,nucleus; GO:0005524,ATP binding; GO:0003677,DNA binding; GO:0004386,helicase activity; GO:0007049,cell cycle; GO:0006270,DNA replication initiation	PF00493.23:MCM P-loop domain
gene-LOC110708527	9.84	7.12	8.78	16.75	22.73	22.09	354	244	259	595	761	651	1.26282	0.000170204	0.01712	up	NW_018742418.1	1300389	1303434	-	LOC110708527	--	K15014 solute carrier family 29 (equilibrative nucleoside transporter), member 1/2/3 | (RefSeq) equilibrative nucleotide transporter 1-like (A)	--	equilibrative nucleotide transporter 1-like [Chenopodium quinoa]	RecName: Full=Equilibrative nucleotide transporter 1; Short=AtENT1; AltName: Full=Nucleoside transporter ENT1;	SubName: Full=Uncharacterized protein {ECO:0000313|EMBL:KNA05384.1};	Nucleoside transporter	GO:0016021,integral component of membrane; GO:0005774,vacuolar membrane; GO:0005337,nucleoside transmembrane transporter activity	PF01733.18:Nucleoside transporter
gene-LOC110705246	3.67	3.04	3.73	6.96	12.48	9.74	199	157	166	373	630	433	1.4765	0.000170338	0.01712	up	NW_018742410.1	441874	448638	+	LOC110705246	--	--	--	--	--	--	--	--	--
novel.1625	0	0	0	0.261346	0.142269	1.50739	0	0	0	25	14	128	8.4139	0.000171166	0.01715	up	NW_018742720.1	1918720	1919707	-	--	--	--	--	protein TIC 55, chloroplastic-like [Chenopodium quinoa]	RecName: Full=Protein TIC 55, chloroplastic; AltName: Full=Translocon at the inner envelope membrane of chloroplasts 55; Short=AtTIC55; AltName: Full=Translocon at the inner envelope membrane of chloroplasts 55-II; Flags: Precursor;	SubName: Full=Uncharacterized protein {ECO:0000313|EMBL:KNA12024.1};	--	GO:0009507,chloroplast; GO:0009941,chloroplast envelope; GO:0009706,chloroplast inner membrane; GO:0016021,integral component of membrane; GO:0051537,2 iron, 2 sulfur cluster binding; GO:0010277,chlorophyllide a oxygenase [overall] activity; GO:0046872,metal ion binding; GO:0045036,protein targeting to chloroplast	--
gene-LOC110725242	11.65	13.6	20.84	34.41	53.55	46.42	491	546	720	1432	2101	1603	1.53001	0.000174525	0.0173693	up	NW_018742810.1	1352038	1354944	-	LOC110725242	--	K15639 PHYB activation tagged suppressor 1 [EC:1.14.-.-] | (RefSeq) cytochrome P450 734A1-like (A)	ko00905: Brassinosteroid biosynthesis	cytochrome P450 CYP72A219-like [Chenopodium quinoa]	RecName: Full=Cytochrome P450 CYP72A219; EC=1.14.-.-; AltName: Full=Cytochrome P450 CYP72A129;	SubName: Full=Uncharacterized protein {ECO:0000313|EMBL:KNA04519.1};	Cytochrome P450 CYP4/CYP19/CYP26 subfamilies	GO:0016021,integral component of membrane; GO:0020037,heme binding; GO:0005506,iron ion binding; GO:0004497,monooxygenase activity; GO:0016705,oxidoreductase activity, acting on paired donors, with incorporation or reduction of molecular oxygen	PF00067.22:Cytochrome P450
gene-LOC110720497	36.97	34.08	18.88	10.76	12.42	7.93	1218	1069	510	350	381	214	-1.51486	0.000175267	0.0173693	down	NW_018742556.1	1903626	1908136	-	LOC110720497	--	K14847 ribosome production factor 2 | (RefSeq) ribosome production factor 2 homolog (A)	--	ribosome production factor 2 homolog [Chenopodium quinoa]	RecName: Full=Ribosome production factor 2 homolog; AltName: Full=Brix domain-containing protein 1 homolog; AltName: Full=Ribosome biogenesis protein RPF2 homolog;	SubName: Full=Uncharacterized protein {ECO:0000313|EMBL:KNA14347.1};	Protein required for biogenesis of the ribosomal 60S subunit	GO:0005730,nucleolus; GO:0019843,rRNA binding; GO:0000463,maturation of LSU-rRNA from tricistronic rRNA transcript (SSU-rRNA, 5.8S rRNA, LSU-rRNA); GO:0000027,ribosomal large subunit assembly	PF04427.18:Brix domain
gene-LOC110685839	5.37	6.3	2.9	14.54	14.41	15.76	194	217	86	519	485	467	1.64646	0.000175341	0.0173693	up	NW_018743850.1	945641	951627	-	LOC110685839	--	K08999 uncharacterized protein | (RefSeq) bifunctional nuclease 2-like (A)	--	bifunctional nuclease 2-like [Chenopodium quinoa]	RecName: Full=Bifunctional nuclease 2; Short=OsBBD2; EC=3.1.-.-;	SubName: Full=Uncharacterized protein {ECO:0000313|EMBL:KNA13507.1};	--	GO:0005634,nucleus; GO:0004518,nuclease activity	PF02577.14:Bifunctional nuclease
gene-LOC110705173	18.49	16.54	20.94	7.16	9.05	5.59	573	488	532	219	261	142	-1.36641	0.000175545	0.0173693	down	NW_018744874.1	2425770	2430377	+	LOC110705173	--	K12883 nuclear cap-binding protein subunit 2 | (RefSeq) nuclear cap-binding protein subunit 2-like (A)	ko03013: RNA transport; ko03015: mRNA surveillance pathway; ko03040: Spliceosome	nuclear cap-binding protein subunit 2-like [Chenopodium quinoa]	RecName: Full=Nuclear cap-binding protein subunit 2; AltName: Full=20 kDa nuclear cap-binding protein; AltName: Full=NCBP 20 kDa subunit; Short=AtCBP20;	RecName: Full=Nuclear cap-binding protein subunit 2 {ECO:0000256|RuleBase:RU364036}; AltName: Full=20 kDa nuclear cap-binding protein {ECO:0000256|RuleBase:RU364036};	Nuclear cap-binding protein complex, subunit CBP20 (RRM superfamily)	GO:0005737,cytoplasm; GO:0005845,mRNA cap binding complex; GO:0005846,nuclear cap binding complex; GO:0005634,nucleus; GO:0000339,RNA cap binding; GO:0045292,mRNA cis splicing, via spliceosome; GO:0000398,mRNA splicing, via spliceosome; GO:0031053,primary miRNA processing; GO:0016070,RNA metabolic process; GO:0000394,RNA splicing, via endonucleolytic cleavage and ligation	PF00076.22:RNA recognition motif. (a.k.a. RRM, RBD, or RNP domain)
gene-LOC110733528	12.2	10.52	8.42	17.68	38.08	32.73	626	514	354	896	1819	1376	1.51043	0.000176391	0.0173693	up	NW_018743199.1	3149458	3153758	+	LOC110733528	--	K14207 solute carrier family 38 (sodium-coupled neutral amino acid transporter), member 2 | (RefSeq) amino acid transporter AVT6A-like (A)	--	amino acid transporter AVT6C-like [Chenopodium quinoa]	RecName: Full=Amino acid transporter AVT6C {ECO:0000305}; Short=AtAvt6C {ECO:0000303|PubMed:27925655};	SubName: Full=Uncharacterized protein {ECO:0000313|EMBL:KNA13423.1};	Amino acid transporter protein	GO:0016021,integral component of membrane; GO:0015171,amino acid transmembrane transporter activity; GO:0003333,amino acid transmembrane transport	PF01490.18:Transmembrane amino acid transporter protein
gene-LOC110702592	5.09	6.56	9.37	0.82	1.97	1.7	233	286	352	37	84	64	-2.24614	0.000176575	0.0173693	down	NW_018744693.1	2937382	2939791	-	LOC110702592	--	--	--	IRK-interacting protein-like [Chenopodium quinoa]	RecName: Full=IRK-interacting protein {ECO:0000303|PubMed:15618632};	SubName: Full=Uncharacterized protein {ECO:0000313|EMBL:KNA14723.1};	--	--	--
gene-LOC110738657	12.19	11.61	7.02	19.69	37.54	48.86	561	509	265	895	1609	1843	1.80532	0.000178839	0.0175387	up	NW_018743391.1	1078453	1092577	+	LOC110738657	--	K15191 La-related protein 7 | (RefSeq) la-related protein 6B (A)	--	la-related protein 6B [Chenopodium quinoa]	RecName: Full=La-related protein 6B; Short=AtLARP6b; AltName: Full=VirF-interacting protein FIP1;	SubName: Full=Uncharacterized protein {ECO:0000313|EMBL:KNA09628.1};	Predicted RNA-binding protein	GO:0030529,NA; GO:0005634,nucleus; GO:0003729,mRNA binding; GO:0006355,regulation of transcription, DNA-templated; GO:0006396,RNA processing; GO:0006351,transcription, DNA-templated	PF05383.17:La domain
gene-LOC110727076	44	45.62	42.17	73.48	198.17	415.36	1348	1331	1059	2223	5652	10427	2.40423	0.000181266	0.017723	up	NW_018742899.1	1076498	1078314	-	LOC110727076	--	K14504 xyloglucan:xyloglucosyl transferase TCH4 [EC:2.4.1.207] | (RefSeq) probable xyloglucan endotransglucosylase/hydrolase protein 23 (A)	ko04075: Plant hormone signal transduction	probable xyloglucan endotransglucosylase/hydrolase protein 23 [Chenopodium quinoa]	RecName: Full=Probable xyloglucan endotransglucosylase/hydrolase protein 23; Short=At-XTH23; Short=XTH-23; EC=2.4.1.207; Flags: Precursor;	RecName: Full=Xyloglucan endotransglucosylase/hydrolase {ECO:0000256|RuleBase:RU361120}; EC=2.4.1.207 {ECO:0000256|RuleBase:RU361120};	--	GO:0048046,apoplast; GO:0005618,cell wall; GO:0005794,Golgi apparatus; GO:0004553,hydrolase activity, hydrolyzing O-glycosyl compounds; GO:0016762,xyloglucan:xyloglucosyl transferase activity; GO:0042546,cell wall biogenesis; GO:0071555,cell wall organization; GO:0010411,xyloglucan metabolic process	PF00722.21:Glycosyl hydrolases family 16
gene-LOC110730398	7.43	7.26	9.97	0.72	2.41	1.65	242	225	266	23	73	44	-2.39451	0.000182025	0.0177436	down	NW_018743032.1	2651734	2655204	-	LOC110730398	--	K09422 transcription factor MYB, plant | (RefSeq) myb-related protein 306-like (A)	--	myb-related protein 306-like [Chenopodium quinoa]	RecName: Full=Myb-related protein 306;	SubName: Full=Uncharacterized protein {ECO:0000313|EMBL:KNA13865.1};	Transcription factor, Myb superfamily	GO:0005634,nucleus; GO:0003677,DNA binding; GO:0006355,regulation of transcription, DNA-templated; GO:0006351,transcription, DNA-templated	PF00249.31:Myb-like DNA-binding domain
gene-LOC110724813	5.67	7.29	4.17	18.36	17.9	48	116	142	70	371	341	805	2.34159	0.000183139	0.0177762	up	NW_018742770.1	3998547	4001433	+	LOC110724813	--	--	--	uncharacterized protein LOC110724813 [Chenopodium quinoa]	--	SubName: Full=Uncharacterized protein {ECO:0000313|EMBL:KNA08565.1};	--	GO:0005509,calcium ion binding	PF13499.6:EF-hand domain pair
novel.1721	1.38658	2.20922	2.34682	5.25328	12.0153	7.57587	108	162	185	414	975	552	2.05909	0.000183457	0.0177762	up	NW_018742733.1	4069908	4070754	-	--	--	--	--	--	--	--	--	--	--
gene-LOC110728214	4.4	4.79	3.11	1.17	1.11	1.29	221	229	128	58	52	53	-1.76113	0.000185196	0.0178654	down	NW_018742914.1	8808380	8815359	+	LOC110728214	--	--	--	uncharacterized protein LOC110728214 [Chenopodium quinoa]	RecName: Full=Putative methylesterase 15, chloroplastic; Short=AtMES15; EC=3.1.1.-; AltName: Full=Protein ROOT HAIR SPECIFIC 9; Flags: Precursor;	SubName: Full=Uncharacterized protein {ECO:0000313|EMBL:KNA25868.1};	--	GO:0009507,chloroplast; GO:0016787,hydrolase activity	PF12697.7:Alpha/beta hydrolase family
gene-LOC110693711	14.11	12.33	0	0	0	0	382	318	0	0	0	0	-10.152	0.000185483	0.0178654	down	NW_018744151.1	4912311	4919873	+	LOC110693711	--	--	--	GDSL esterase/lipase At5g45960-like [Chenopodium quinoa]	RecName: Full=GDSL esterase/lipase At5g45960; EC=3.1.1.-; AltName: Full=Extracellular lipase At5g45960; Flags: Precursor;	SubName: Full=Uncharacterized protein {ECO:0000313|EMBL:KNA21447.1}; Flags: Fragment;	--	GO:0005576,extracellular region; GO:0016788,hydrolase activity, acting on ester bonds; GO:0016042,lipid catabolic process	PF00657.22:GDSL-like Lipase/Acylhydrolase
gene-LOC110736586	9.79	9.38	14.49	22.37	44.7	32.39	635	579	770	1432	2698	1721	1.54348	0.00018633	0.0178938	up	NW_018743292.1	5013121	5023183	-	LOC110736586	--	--	--	probable serine/threonine-protein kinase kinX isoform X1 [Chenopodium quinoa]	--	SubName: Full=Uncharacterized protein {ECO:0000313|EMBL:KNA24753.1};	--	--	PF12152.8:Eukaryotic translation initiation factor 4G1
gene-LOC110725768	9.92	8.77	12.32	19.02	47.74	60.59	322	271	328	610	1443	1612	2.03587	0.000188151	0.0180152	up	NW_018742815.1	3328854	3333413	+	LOC110725768	--	K03875 F-box and leucine-rich repeat protein 1 (S-phase kinase-associated protein 2) | (RefSeq) F-box protein SKP2A-like (A)	ko04120: Ubiquitin mediated proteolysis	F-box protein SKP2A-like [Chenopodium quinoa]	RecName: Full=F-box protein SKP2A; AltName: Full=FBL5-like protein; Short=AtFBL5; AltName: Full=SKP2-like protein 1; Short=AtSKP2;1;	SubName: Full=Uncharacterized protein {ECO:0000313|EMBL:KNA14224.1};	Leucine rich repeat proteins, some proteins contain F-box	GO:0005634,nucleus; GO:0019005,SCF ubiquitin ligase complex; GO:0004842,ubiquitin-protein transferase activity; GO:0009734,auxin-activated signaling pathway; GO:0071365,cellular response to auxin stimulus; GO:0010311,lateral root formation; GO:0051781,positive regulation of cell division; GO:0016567,protein ubiquitination; GO:0031146,SCF-dependent proteasomal ubiquitin-dependent protein catabolic…	PF13516.6:Leucine Rich repeat
gene-LOC110682388	14.5	12.87	13.73	23.33	51.58	38.58	496	419	385	788	1642	1081	1.45673	0.000189427	0.0180839	up	NW_018742244.1	3476292	3481252	+	LOC110682388	--	--	--	O-acyltransferase WSD1-like [Chenopodium quinoa]	RecName: Full=O-acyltransferase WSD1; AltName: Full=Diacylglycerol O-acyltransferase; Short=DGAT; EC=2.3.1.20; AltName: Full=Long-chain-alcohol O-fatty-acyltransferase; EC=2.3.1.75; AltName: Full=Wax synthase; Short=WS;	SubName: Full=Uncharacterized protein {ECO:0000313|EMBL:KMS96516.1};	--	GO:0005783,endoplasmic reticulum; GO:0005789,endoplasmic reticulum membrane; GO:0016021,integral component of membrane; GO:0005886,plasma membrane; GO:0102966,arachidoyl-CoA:1-dodecanol O-acyltransferase activity; GO:0004144,diacylglycerol O-acyltransferase activity; GO:0047196,long-chain-alcohol O-fatty-acyltransferase activity; GO:0103095,wax ester synthase activity; GO:0019432,triglyceride bio…	PF06974.13:Protein of unknown function (DUF1298)
gene-LOC110730123	3.49	2.89	1.1	0.43	0.26	0.12	244	192	63	30	17	7	-3.14979	0.000191085	0.0181884	down	NW_018743021.1	630755	637238	-	LOC110730123	--	K09338 homeobox-leucine zipper protein | (RefSeq) homeobox-leucine zipper protein PROTODERMAL FACTOR 2-like (A)	--	homeobox-leucine zipper protein HDG5-like [Chenopodium quinoa]	RecName: Full=Homeobox-leucine zipper protein ROC3; AltName: Full=GLABR 2-like homeobox protein 3; AltName: Full=HD-ZIP protein ROC3; AltName: Full=Homeodomain transcription factor ROC3; AltName: Full=Protein RICE OUTERMOST CELL-SPECIFIC 3;	SubName: Full=Uncharacterized protein {ECO:0000313|EMBL:KNA17882.1};	--	GO:0005634,nucleus; GO:0008289,lipid binding; GO:0043565,sequence-specific DNA binding; GO:0006355,regulation of transcription, DNA-templated; GO:0006351,transcription, DNA-templated	PF01852.19:START domain
gene-LOC110691223	4.57	4.72	2.96	0.26	0.35	0	307	302	163	17	22	0	-4.34298	0.000193121	0.0183284	down	NW_018744072.1	1686737	1693773	-	LOC110691223	--	K15925 alpha-D-xyloside xylohydrolase [EC:3.2.1.177] | (RefSeq) alpha-xylosidase 1-like (A)	--	alpha-xylosidase 1-like [Chenopodium quinoa]	RecName: Full=Alpha-xylosidase 1; EC=3.2.1.177; Flags: Precursor;	SubName: Full=Uncharacterized protein {ECO:0000313|EMBL:KNA22484.1};	Maltase glucoamylase and related hydrolases, glycosyl hydrolase family 31	GO:0048046,apoplast; GO:0005618,cell wall; GO:0009507,chloroplast; GO:0009505,plant-type cell wall; GO:0009506,plasmodesma; GO:0061634,alpha-D-xyloside xylohydrolase; GO:0046556,alpha-L-arabinofuranosidase activity; GO:0030246,carbohydrate binding; GO:0009044,xylan 1,4-beta-xylosidase activity; GO:0080176,xyloglucan 1,6-alpha-xylosidase activity; GO:0071555,cell wall organization; GO:0046686,resp…	PF01055.26:Glycosyl hydrolases family 31
gene-LOC110707845	6.35	7.07	8.64	13.69	62.34	32.39	218	231	243	464	1992	911	2.26112	0.000195	0.0184438	up	NW_018745003.1	2167612	2172204	-	LOC110707845	--	K05605 3-hydroxyisobutyryl-CoA hydrolase [EC:3.1.2.4] | (RefSeq) 3-hydroxyisobutyryl-CoA hydrolase-like protein 3, mitochondrial (A)	ko00280: Valine, leucine and isoleucine degradation; ko00410: beta-Alanine metabolism; ko00640: Propanoate metabolism; ko01200: Carbon metabolism	3-hydroxyisobutyryl-CoA hydrolase-like protein 3, mitochondrial [Chenopodium quinoa]	RecName: Full=3-hydroxyisobutyryl-CoA hydrolase-like protein 3, mitochondrial; EC=3.1.2.-; Flags: Precursor;	SubName: Full=Uncharacterized protein {ECO:0000313|EMBL:KNA08116.1};	Enoyl-CoA hydratase	GO:0005829,cytosol; GO:0005739,mitochondrion; GO:0003860,3-hydroxyisobutyryl-CoA hydrolase activity	PF16113.5:Enoyl-CoA hydratase/isomerase
gene-LOC110727078	0.26	0.15	0.11	0.97	2.44	3.49	9	5	3	33	78	98	3.73823	0.000195477	0.0184438	up	NW_018742899.1	1095843	1097771	-	LOC110727078	--	--	--	uncharacterized protein LOC110727078 [Chenopodium quinoa]	--	SubName: Full=Uncharacterized protein {ECO:0000313|EMBL:KNA16450.1};	--	--	PF04601.13:Domain of unknown function (DUF569)
gene-LOC110697062	10.29	11	13.37	27.23	43.29	95.53	168	171	179	439	658	1278	2.27861	0.000197299	0.0185616	up	NW_018744460.1	454387	455431	+	LOC110697062	--	--	--	heavy metal-associated isoprenylated plant protein 39-like [Chenopodium quinoa]	RecName: Full=Heavy metal-associated isoprenylated plant protein 39 {ECO:0000303|PubMed:21072340, ECO:0000303|PubMed:23368984}; Short=AtHIP39 {ECO:0000303|PubMed:21072340, ECO:0000303|PubMed:23368984}; Flags: Precursor;	SubName: Full=Uncharacterized protein {ECO:0000313|EMBL:JAU45988.1};	Copper chaperone	GO:0005737,cytoplasm; GO:0046914,transition metal ion binding; GO:0046916,cellular transition metal ion homeostasis; GO:0030001,metal ion transport	PF00403.26:Heavy-metal-associated domain
novel.17	36.1431	43.0713	30.5192	20.6219	13.0354	12.7444	2955	3334	2535	1718	1119	982	-1.18548	0.000203094	0.0189758	down	NW_018742204.1	1949353	1950248	.	--	--	--	--	--	--	--	--	--	--
gene-LOC110712381	4.44	3.77	8.02	12.21	31.12	43.45	162	131	240	440	1057	1299	2.40716	0.000203461	0.0189758	up	NW_018745323.1	2409872	2414896	-	LOC110712381	--	K13416 brassinosteroid insensitive 1-associated receptor kinase 1 [EC:2.7.10.1 2.7.11.1] | (RefSeq) BRASSINOSTEROID INSENSITIVE 1-associated receptor kinase 1-like (A)	ko04016: MAPK signaling pathway - plant; ko04075: Plant hormone signal transduction; ko04626: Plant-pathogen interaction	rust resistance kinase Lr10-like isoform X1 [Chenopodium quinoa]	RecName: Full=Rust resistance kinase Lr10 {ECO:0000312|EMBL:AAC49629.1}; EC=2.7.11.1; AltName: Full=Probable receptor-like serine/threonine-protein kinase LRK10; Flags: Precursor;	SubName: Full=Uncharacterized protein {ECO:0000313|EMBL:KNA25726.1};	Serine/threonine protein kinase	GO:0016021,integral component of membrane; GO:0005886,plasma membrane; GO:0005524,ATP binding; GO:0004674,protein serine/threonine kinase activity	PF07714.17:Protein tyrosine kinase
gene-LOC110688345	0.1	0.11	0	1.04	4.01	3.56	2	2	0	20	73	57	5.33944	0.00020577	0.019136	up	NW_018743920.1	7763589	7765120	-	LOC110688345	--	K00799 glutathione S-transferase [EC:2.5.1.18] | (RefSeq) glutathione S-transferase U7-like (A)	ko00480: Glutathione metabolism	glutathione S-transferase U7-like [Chenopodium quinoa]	RecName: Full=Glutathione S-transferase U7; Short=AtGSTU7; EC=2.5.1.18; AltName: Full=GST class-tau member 7; AltName: Full=Glutathione S-transferase 25;	SubName: Full=Uncharacterized protein {ECO:0000313|EMBL:OMO90544.1};	Glutathione S-transferase	GO:0005737,cytoplasm; GO:0005829,cytosol; GO:0004364,glutathione transferase activity; GO:0006749,glutathione metabolic process; GO:0009751,response to salicylic acid; GO:0009407,toxin catabolic process	PF02798.20:Glutathione S-transferase, N-terminal domain
gene-LOC110698887	8.02	8.78	0	0	0	0	331	345	0	0	0	0	-10.1058	0.00020688	0.0191841	down	NW_018744537.1	2548959	2550962	-	LOC110698887	--	K13420 LRR receptor-like serine/threonine-protein kinase FLS2 [EC:2.7.11.1] | (RefSeq) LRR receptor-like serine/threonine-protein kinase FLS2 (A)	ko04016: MAPK signaling pathway - plant; ko04626: Plant-pathogen interaction	protein TOO MANY MOUTHS-like [Chenopodium quinoa]	RecName: Full=Protein TOO MANY MOUTHS {ECO:0000303|PubMed:11536724}; AltName: Full=Receptor-like protein 17 {ECO:0000303|PubMed:18434605}; Short=AtRLP17 {ECO:0000303|PubMed:18434605}; Flags: Precursor;	SubName: Full=Uncharacterized protein {ECO:0000313|EMBL:KNA12222.1};	FOG: Leucine rich repeat	GO:0031225,anchored component of membrane; GO:0016021,integral component of membrane; GO:0016020,membrane; GO:0005886,plasma membrane; GO:0042277,peptide binding; GO:0004872,NA; GO:0008356,asymmetric cell division; GO:0009737,response to abscisic acid	PF13855.6:Leucine rich repeat
gene-LOC110724515	6.93	9.82	4.26	15.02	43.16	37.09	143	193	72	306	829	627	2.18806	0.000208482	0.0192774	up	NW_018742770.1	3928234	3929235	-	LOC110724515	--	--	--	--	--	--	--	--	--
gene-LOC110732060	9.63	8.03	7.93	3.14	3.62	3.53	360	286	243	116	126	108	-1.30367	0.000210092	0.019371	down	NW_018743136.1	2715595	2718369	+	LOC110732060	--	K00847 fructokinase [EC:2.7.1.4] | (RefSeq) probable fructokinase-4 (A)	ko00051: Fructose and mannose metabolism; ko00500: Starch and sucrose metabolism; ko00520: Amino sugar and nucleotide sugar metabolism	fructokinase-like 1, chloroplastic [Chenopodium quinoa]	RecName: Full=Fructokinase-like 1, chloroplastic {ECO:0000312|EMBL:AEE79187.1}; AltName: Full=PEP-associated protein 6 {ECO:0000303|PubMed:21949211}; AltName: Full=pfkB-type carbohydrate kinase family protein 2 {ECO:0000303|PubMed:16326926}; Flags: Precursor;	SubName: Full=Uncharacterized protein {ECO:0000313|EMBL:KNA13126.1};	Ribokinase	GO:0009507,chloroplast; GO:0042644,chloroplast nucleoid; GO:0005737,cytoplasm; GO:0009295,nucleoid; GO:0005634,nucleus; GO:0016301,kinase activity; GO:0016773,phosphotransferase activity, alcohol group as acceptor; GO:0043621,protein self-association; GO:0009658,chloroplast organization; GO:0042793,plastid transcription	PF00294.24:pfkB family carbohydrate kinase
novel.3681	9.08387	11.3002	6.11742	3.96179	2.97425	3.50269	793	934	542	354	274	288	-1.25199	0.000212557	0.0195426	down	NW_018743466.1	325384	326449	+	--	--	--	--	--	--	--	--	--	--
gene-LOC110717338	1.93	2.62	2.53	5.08	11.83	11.15	78	101	84	203	446	370	1.98224	0.000213515	0.019575	up	NW_018745684.1	1620346	1625935	+	LOC110717338	--	K14431 transcription factor TGA | (RefSeq) transcription factor TGA4-like (A)	ko04075: Plant hormone signal transduction	transcription factor TGA4-like [Chenopodium quinoa]	RecName: Full=Transcription factor TGA4; AltName: Full=Ocs element-binding factor 4; Short=OBF4; AltName: Full=bZIP transcription factor 57; Short=AtbZIP57;	SubName: Full=Uncharacterized protein {ECO:0000313|EMBL:KNA18624.1};	--	GO:0005634,nucleus; GO:0003700,DNA-binding transcription factor activity; GO:0043565,sequence-specific DNA binding; GO:0009409,response to cold; GO:0006351,transcription, DNA-templated	PF14144.6:Seed dormancy control
gene-LOC110731377	11.61	11.99	21.17	1.45	4.65	3.84	789	776	1179	97	294	214	-2.20018	0.000218183	0.0199147	down	NW_018743066.1	2322113	2328836	-	LOC110731377	--	K09338 homeobox-leucine zipper protein | (RefSeq) homeobox-leucine zipper protein PROTODERMAL FACTOR 2-like (A)	--	homeobox-leucine zipper protein PROTODERMAL FACTOR 2-like [Chenopodium quinoa]	RecName: Full=Homeobox-leucine zipper protein PROTODERMAL FACTOR 2; AltName: Full=HD-ZIP protein PDF2; AltName: Full=Homeodomain transcription factor PDF2;	SubName: Full=Uncharacterized protein {ECO:0000313|EMBL:KNA12568.1};	--	GO:0005634,nucleus; GO:0003677,DNA binding; GO:0003700,DNA-binding transcription factor activity; GO:0008289,lipid binding; GO:0043565,sequence-specific DNA binding; GO:0048825,cotyledon development; GO:0009913,epidermal cell differentiation; GO:0009845,seed germination; GO:0006351,transcription, DNA-templated	PF01852.19:START domain
gene-LOC110717396	9.36	11.05	10.65	17.98	28.96	26.41	340	382	317	645	979	786	1.24068	0.000218451	0.0199147	up	NW_018745684.1	10996517	11005230	-	LOC110717396	--	K23544 serine incorporator 1/3 | (RefSeq) serine incorporator 3-like (A)	--	serine incorporator 3-like [Chenopodium quinoa]	--	SubName: Full=Uncharacterized protein {ECO:0000313|EMBL:KNA10893.1};	Tumor differentially expressed (TDE) protein	GO:0016021,integral component of membrane	PF03348.15:Serine incorporator (Serinc)
gene-LOC110738133	12.9	10.75	40.01	3.26	2.79	0.94	184	146	468	46	37	11	-3.21979	0.000219477	0.0199521	down	NW_018743373.1	1294142	1295553	-	LOC110738133	--	--	--	stress-response A/B barrel domain-containing protein At5g22580-like [Chenopodium quinoa]	RecName: Full=Stress-response A/B barrel domain-containing protein At5g22580 {ECO:0000305}; AltName: Full=Uncharacterized protein At5g22580;	SubName: Full=Uncharacterized protein {ECO:0000313|EMBL:KNA05671.1};	--	GO:0009507,chloroplast; GO:0046872,metal ion binding	PF07876.12:Stress responsive A/B Barrel Domain
gene-LOC110714466	16.34	13.21	16.76	4.52	2.61	1.34	282	217	237	77	42	19	-2.43438	0.000221539	0.0200831	down	NW_018745454.1	6510083	6513100	-	LOC110714466	--	K11088 small nuclear ribonucleoprotein D3 | (RefSeq) small nuclear ribonucleoprotein SmD3b-like (A)	ko03040: Spliceosome	small nuclear ribonucleoprotein SmD3b-like [Chenopodium quinoa]	RecName: Full=Small nuclear ribonucleoprotein SmD3b {ECO:0000305}; Short=SmD3-b {ECO:0000303|PubMed:21421416}; AltName: Full=snRNP core protein D3-b {ECO:0000305};	SubName: Full=Uncharacterized protein {ECO:0000313|EMBL:KNA18151.1};	Small nuclear ribonucleoprotein Sm D3	GO:0071013,catalytic step 2 spliceosome; GO:0000243,commitment complex; GO:0005829,cytosol; GO:0005730,nucleolus; GO:0034715,pICln-Sm protein complex; GO:0071011,precatalytic spliceosome; GO:0071010,prespliceosome; GO:0034719,SMN-Sm protein complex; GO:0097526,spliceosomal tri-snRNP complex; GO:0005685,U1 snRNP; GO:0005689,U12-type spliceosomal complex; GO:0005686,U2 snRNP; GO:0005687,U4 snRNP; G…	PF01423.22:LSM domain
gene-LOC110739249	54.1	40.69	61.98	95.33	163.84	179.69	1135	813	1066	1975	3200	3089	1.48284	0.000222863	0.0201023	up	NW_018743448.1	984650	989349	+	LOC110739249	--	K06689 ubiquitin-conjugating enzyme E2 D [EC:2.3.2.23] | (RefSeq) ubiquitin-conjugating enzyme E2 8-like (A)	ko04120: Ubiquitin mediated proteolysis; ko04141: Protein processing in endoplasmic reticulum	ubiquitin-conjugating enzyme E2 8-like [Chenopodium quinoa]	RecName: Full=Ubiquitin-conjugating enzyme E2 8; EC=2.3.2.23; AltName: Full=E2 ubiquitin-conjugating enzyme 8; AltName: Full=UBCAT4A; AltName: Full=Ubiquitin carrier protein 8; AltName: Full=Ubiquitin-conjugating enzyme E2-17 kDa 8; AltName: Full=Ubiquitin-protein ligase 8;	SubName: Full=Uncharacterized protein {ECO:0000313|EMBL:KNA09721.1};	Ubiquitin-protein ligase	GO:0005737,cytoplasm; GO:0005634,nucleus; GO:0005524,ATP binding; GO:0004842,ubiquitin-protein transferase activity; GO:0009960,endosperm development; GO:0006511,ubiquitin-dependent protein catabolic process	PF00179.26:Ubiquitin-conjugating enzyme
gene-LOC110692155	15.89	13.94	10.26	25.12	39.62	30.7	412	344	218	643	956	652	1.25848	0.000222993	0.0201023	up	NW_018744093.1	3287544	3291797	+	LOC110692155	--	--	--	protein HEADING DATE REPRESSOR 1-like [Chenopodium quinoa]	RecName: Full=Protein HEADING DATE REPRESSOR 1 {ECO:0000303|PubMed:26954091};	SubName: Full=Uncharacterized protein {ECO:0000313|EMBL:KNA22840.1};	--	GO:0005634,nucleus; GO:0009908,flower development	--
gene-LOC110698123	90.85	75.21	4.13	2.88	1.04	0	1691	1333	63	53	18	0	-5.3743	0.000224922	0.0202198	down	NW_018744502.1	7436441	7438661	-	LOC110698123	--	--	--	CASP-like protein 1E1 [Chenopodium quinoa]	RecName: Full=CASP-like protein 1E1; Short=VvCASPL1E1;	RecName: Full=CASP-like protein {ECO:0000256|RuleBase:RU361233};	--	GO:0016021,integral component of membrane; GO:0005886,plasma membrane; GO:0051536,iron-sulfur cluster binding	PF04535.12:Domain of unknown function (DUF588)
gene-LOC110687845	7.18	9.98	9.32	19.92	26.69	27.41	108	143	115	296	374	338	1.48899	0.000232319	0.0208269	up	NW_018743920.1	1719522	1721700	-	LOC110687845	--	--	--	--	--	--	--	--	--
gene-LOC110692294	0.15	0.18	0	1.43	2.15	3.65	7	8	0	66	94	140	4.49721	0.000233186	0.020847	up	NW_018744100.1	770641	774481	-	LOC110692294	--	--	--	uncharacterized oxidoreductase At4g09670-like [Chenopodium quinoa]	RecName: Full=Uncharacterized oxidoreductase At4g09670; EC=1.-.-.-;	SubName: Full=Uncharacterized protein {ECO:0000313|EMBL:EMJ17954.1}; Flags: Fragment;	Dimeric dihydrodiol dehydrogenase	GO:0005829,cytosol; GO:0016491,oxidoreductase activity	PF01408.22:Oxidoreductase family, NAD-binding Rossmann fold
gene-LOC110724699	63.05	64.32	36.22	109.93	137.53	124.27	1049	1019	494	1806	2130	1694	1.20366	0.000235791	0.0210218	up	NW_018742770.1	2679640	2681031	+	LOC110724699	--	K11253 histone H3 | (RefSeq) histone H3.3 (A)	--	hypothetical protein PHYPA_023132 [Physcomitrella patens]	RecName: Full=Histone H3.3;	RecName: Full=Histone H3 {ECO:0000256|RuleBase:RU004471};	Histones H3 and H4	GO:0000786,nucleosome; GO:0005634,nucleus; GO:0003677,DNA binding; GO:0046982,protein heterodimerization activity	PF00125.24:Core histone H2A/H2B/H3/H4
gene-LOC110685901	26.37	26.45	22.83	39.49	127.02	89.78	848	810	602	1254	3803	2366	1.74882	0.000237944	0.0210975	up	NW_018743850.1	1705874	1710391	-	LOC110685901	--	K03875 F-box and leucine-rich repeat protein 1 (S-phase kinase-associated protein 2) | (RefSeq) F-box protein SKP2A-like isoform X1 (A)	ko04120: Ubiquitin mediated proteolysis	F-box protein SKP2A-like isoform X1 [Chenopodium quinoa]	RecName: Full=F-box protein SKP2A; AltName: Full=FBL5-like protein; Short=AtFBL5; AltName: Full=SKP2-like protein 1; Short=AtSKP2;1;	SubName: Full=Uncharacterized protein {ECO:0000313|EMBL:KNA14224.1};	Leucine rich repeat proteins, some proteins contain F-box	GO:0005634,nucleus; GO:0019005,SCF ubiquitin ligase complex; GO:0004842,ubiquitin-protein transferase activity; GO:0009734,auxin-activated signaling pathway; GO:0071365,cellular response to auxin stimulus; GO:0010311,lateral root formation; GO:0051781,positive regulation of cell division; GO:0016567,protein ubiquitination; GO:0031146,SCF-dependent proteasomal ubiquitin-dependent protein catabolic…	PF13516.6:Leucine Rich repeat
gene-LOC110728236	0.02	0	0	0.27	1.5	1.43	1	0	0	13	67	56	7.02892	0.000240397	0.0212567	up	NW_018742914.1	9084291	9086855	-	LOC110728236	--	--	--	--	--	--	--	--	--
gene-LOC110726781	21.19	19.38	28.77	48.37	66.26	48.54	814	709	906	1835	2370	1528	1.22443	0.000241149	0.0212652	up	NW_018742881.1	1295616	1302691	+	LOC110726781	--	--	--	stAR-related lipid transfer protein 7, mitochondrial-like [Chenopodium quinoa]	--	SubName: Full=Uncharacterized protein {ECO:0000313|EMBL:KNA14398.1};	START domain-containing proteins involved in steroidogenesis/phosphatidylcholine transfer	GO:0016021,integral component of membrane; GO:0008289,lipid binding	PF01852.19:START domain
gene-LOC110719647	5.65	5.74	6.48	9.77	26.05	25.53	450	435	423	768	1930	1665	1.77218	0.000245053	0.0215507	up	NW_018742484.1	7424111	7430757	+	LOC110719647	--	--	--	paramyosin-like [Chenopodium quinoa]	RecName: Full=COP1-interactive protein 1 {ECO:0000303|PubMed:7753789};	SubName: Full=Uncharacterized protein {ECO:0000313|EMBL:KNA25283.1};	--	GO:0009507,chloroplast; GO:0005856,cytoskeleton; GO:0005886,plasma membrane; GO:0005774,vacuolar membrane; GO:0005773,vacuole; GO:0003779,actin binding; GO:0009738,abscisic acid-activated signaling pathway; GO:0071215,cellular response to abscisic acid stimulus; GO:0009789,positive regulation of abscisic acid-activated signaling pathway; GO:0042306,regulation of protein import into nucleus; GO:00…	PF07765.12:KIP1-like protein
gene-LOC110735128	147.92	139.54	81.1	44.7	14.98	22.54	1602	1439	720	478	151	200	-2.11312	0.000248981	0.0218368	down	NW_018743252.1	6933837	6934362	-	LOC110735128	--	K11254 histone H4 | (RefSeq) histone H4 (A)	--	hypothetical protein SETIT_032292mg, partial [Setaria italica]	RecName: Full=Histone H4;	RecName: Full=Histone H4 {ECO:0000256|RuleBase:RU000528}; Flags: Fragment;	Histone H4	GO:0009507,chloroplast; GO:0005829,cytosol; GO:0000788,nuclear nucleosome; GO:0005730,nucleolus; GO:0005886,plasma membrane; GO:0009506,plasmodesma; GO:0009579,thylakoid; GO:0005774,vacuolar membrane; GO:0003677,DNA binding; GO:0042393,histone binding; GO:0046982,protein heterodimerization activity; GO:0006334,nucleosome assembly; GO:0009414,response to water deprivation	PF15511.6:Centromere kinetochore component CENP-T histone fold
gene-LOC110712616	2.69	2.28	1.75	5.64	6.18	5.96	133	107	71	275	284	241	1.41925	0.000253555	0.0221478	up	NW_018745323.1	1565868	1570417	+	LOC110712616	--	--	--	probable E3 ubiquitin-protein ligase HERC4 [Chenopodium quinoa]	RecName: Full=Ultraviolet-B receptor UVR8; AltName: Full=Protein UV-B RESISTANCE 8; AltName: Full=RCC1 domain-containing protein UVR8;	SubName: Full=Uncharacterized protein {ECO:0000313|EMBL:KNA04190.1};	FOG: RCC1 domain	GO:0000785,chromatin; GO:0005829,cytosol; GO:0005634,nucleus; GO:0003682,chromatin binding; GO:0005085,guanyl-nucleotide exchange factor activity; GO:0042802,identical protein binding; GO:0009881,photoreceptor activity; GO:0042803,protein homodimerization activity; GO:0009649,entrainment of circadian clock; GO:0018298,protein-chromophore linkage; GO:0009411,response to UV; GO:0010224,response to …	PF00415.18:Regulator of chromosome condensation (RCC1) repeat
gene-LOC110708210	2.79	5.62	9.42	33.19	18.52	39.13	106	203	293	1243	654	1216	2.35821	0.000253896	0.0221478	up	NW_018745014.1	140117	147804	+	LOC110708210	--	K16290 xylem cysteine proteinase [EC:3.4.22.-] | (RefSeq) cysteine protease XCP2-like (A)	--	low-temperature-induced cysteine proteinase-like [Chenopodium quinoa]	RecName: Full=Cysteine proteinase RD21A {ECO:0000305}; EC=3.4.22.- {ECO:0000305}; AltName: Full=Protein RESPONSIVE TO DEHYDRATION 21 {ECO:0000303|PubMed:8325504}; Short=RD21 {ECO:0000303|PubMed:8325504}; Flags: Precursor;	SubName: Full=Cysteine proteinase {ECO:0000313|EMBL:BAD16614.1};	Cysteine proteinase Cathepsin L	GO:0048046,apoplast; GO:0009507,chloroplast; GO:0010494,cytoplasmic stress granule; GO:0005615,extracellular space; GO:0005794,Golgi apparatus; GO:0005764,lysosome; GO:0000932,P-body; GO:0009506,plasmodesma; GO:0005773,vacuole; GO:0004197,cysteine-type endopeptidase activity; GO:0008234,cysteine-type peptidase activity; GO:0008233,peptidase activity; GO:0050832,defense response to fungus; GO:0006…	PF00112.23:Papain family cysteine protease
gene-LOC110691911	24.52	26.02	15.35	7.84	9.97	9.15	877	886	450	277	332	268	-1.27119	0.000255297	0.0222101	down	NW_018744092.1	3787558	3793021	+	LOC110691911	--	K05605 3-hydroxyisobutyryl-CoA hydrolase [EC:3.1.2.4] | (RefSeq) 3-hydroxyisobutyryl-CoA hydrolase-like protein 5 (A)	ko00280: Valine, leucine and isoleucine degradation; ko00410: beta-Alanine metabolism; ko00640: Propanoate metabolism; ko01200: Carbon metabolism	3-hydroxyisobutyryl-CoA hydrolase-like protein 5 [Chenopodium quinoa]	RecName: Full=3-hydroxyisobutyryl-CoA hydrolase-like protein 5; EC=3.1.2.-;	SubName: Full=Uncharacterized protein {ECO:0000313|EMBL:KNA19729.1};	--	GO:0003860,3-hydroxyisobutyryl-CoA hydrolase activity; GO:0080167,response to karrikin	PF16113.5:Enoyl-CoA hydratase/isomerase
novel.1971	0.099407	0	0	0.708653	1.69352	4.1416	4	0	0	30	72	157	6.24368	0.000258317	0.0224127	up	NW_018742815.1	5226223	5229583	+	--	--	--	--	--	--	--	--	--	--
novel.7567	0.123721	0.173809	0	1.89656	1.41263	1.70769	12	16	0	188	144	156	4.26529	0.000261776	0.0225499	up	NW_018745170.1	975670	977909	-	--	--	--	--	--	--	--	--	--	--
gene-LOC110707960	189.15	152.78	74.89	50.69	22.7	25.97	2551	1962	828	675	285	287	-2.01968	0.00026199	0.0225499	down	NW_018745003.1	3681211	3681865	-	LOC110707960	--	K11252 histone H2B | (RefSeq) histone H2B (A)	--	PREDICTED: probable histone H2B.1 isoform X1 [Beta vulgaris subsp. vulgaris]	RecName: Full=Histone H2B.11;	RecName: Full=Histone H2B {ECO:0000256|RuleBase:RU000451};	Histone H2B	GO:0000786,nucleosome; GO:0005634,nucleus; GO:0003677,DNA binding; GO:0046982,protein heterodimerization activity	PF00125.24:Core histone H2A/H2B/H3/H4
gene-LOC110687776	28.08	28.84	25.45	44.15	70.02	78.08	813	795	604	1262	1887	1852	1.23252	0.000265151	0.0226014	up	NW_018743920.1	594288	598503	-	LOC110687776	--	K10949 ER lumen protein retaining receptor | (RefSeq) putative ER lumen protein-retaining receptor C28H8.4 (A)	--	putative ER lumen protein-retaining receptor C28H8.4 [Chenopodium quinoa]	RecName: Full=ER lumen protein-retaining receptor B;	SubName: Full=Uncharacterized protein {ECO:0000313|EMBL:KNA20699.1};	ER lumen protein retaining receptor	GO:0005789,endoplasmic reticulum membrane; GO:0005794,Golgi apparatus; GO:0000139,Golgi membrane; GO:0016021,integral component of membrane; GO:0046923,ER retention sequence binding; GO:0010204,defense response signaling pathway, resistance gene-independent; GO:0006621,protein retention in ER lumen; GO:0015031,protein transport; GO:0016192,vesicle-mediated transport	PF00810.18:ER lumen protein retaining receptor
gene-LOC110682676	32.23	31.81	101.37	201.3	255.08	418.05	365	343	941	2251	2689	3879	2.38674	0.000265372	0.0226014	up	NW_018743575.1	872248	873476	+	LOC110682676	--	--	--	--	--	--	--	--	--
gene-LOC110687452	5.09	6.22	2.83	11.37	15.98	13.78	257	299	117	567	751	570	1.55892	0.000266053	0.0226014	up	NW_018743919.1	3894093	3900653	+	LOC110687452	--	K14445 solute carrier family 13 (sodium-dependent dicarboxylate transporter), member 2/3/5 | (RefSeq) tonoplast dicarboxylate transporter-like (A)	--	tonoplast dicarboxylate transporter-like [Chenopodium quinoa]	RecName: Full=Tonoplast dicarboxylate transporter; Short=AttDT; AltName: Full=Sodium-dicarboxylate cotransporter-like; Short=AtSDAT; AltName: Full=Vacuolar malate transporter;	SubName: Full=Uncharacterized protein {ECO:0000313|EMBL:KNA24065.1};	Na+/dicarboxylate, Na+/tricarboxylate and phosphate transporters	GO:0016021,integral component of membrane; GO:0005774,vacuolar membrane; GO:0005773,vacuole; GO:0015140,malate transmembrane transporter activity; GO:0015743,malate transport; GO:0051453,regulation of intracellular pH; GO:0006814,sodium ion transport	PF00939.19:Sodium:sulfate symporter transmembrane region
gene-LOC110733051	13.04	11.45	4.8	1.91	3.39	2.03	752	629	227	109	182	96	-1.98562	0.000272869	0.0230901	down	NW_018743196.1	1367312	1373611	-	LOC110733051	--	K02210 DNA replication licensing factor MCM7 [EC:3.6.4.12] | (RefSeq) DNA replication licensing factor MCM7 (A)	ko03030: DNA replication	DNA replication licensing factor MCM7 [Chenopodium quinoa]	RecName: Full=DNA replication licensing factor MCM7; EC=3.6.4.12; AltName: Full=Minichromosome maintenance protein 7; Short=OsMCM7;	RecName: Full=DNA helicase {ECO:0000256|SAAS:SAAS00536514}; EC=3.6.4.12 {ECO:0000256|SAAS:SAAS00536514};	DNA replication licensing factor, MCM7 component	GO:0005737,cytoplasm; GO:0042555,MCM complex; GO:0000347,THO complex; GO:0005524,ATP binding; GO:0003677,DNA binding; GO:0003678,DNA helicase activity; GO:0007049,cell cycle; GO:0006270,DNA replication initiation	PF00493.23:MCM P-loop domain
gene-LOC110687422	15.32	17.81	17.96	30.32	48.24	60.34	439	486	422	858	1287	1417	1.45051	0.00027326	0.0230901	up	NW_018743919.1	3476094	3484327	-	LOC110687422	--	K17893 ubiquinol oxidase [EC:1.10.3.11] | (RefSeq) ubiquinol oxidase 4, chloroplastic/chromoplastic (A)	--	ubiquinol oxidase 4, chloroplastic/chromoplastic [Chenopodium quinoa]	RecName: Full=Ubiquinol oxidase 4, chloroplastic/chromoplastic; EC=1.10.3.11; AltName: Full=Alternative oxidase 4; AltName: Full=Plastid terminal oxidase; AltName: Full=Protein IMMUTANS; Flags: Precursor;	RecName: Full=Ubiquinol oxidase {ECO:0000256|RuleBase:RU003779}; EC=1.10.3.11 {ECO:0000256|RuleBase:RU003779};	--	GO:0009535,chloroplast thylakoid membrane; GO:0046862,chromoplast membrane; GO:0016021,integral component of membrane; GO:0070469,respiratory chain; GO:0009579,thylakoid; GO:0009916,alternative oxidase activity; GO:0046872,metal ion binding; GO:0102721,ubiquinol:oxygen oxidoreductase activity; GO:0016117,carotenoid biosynthetic process; GO:0009657,plastid organization	PF01786.17:Alternative oxidase
novel.4512	0	0	0	1.16311	0.447592	2.01278	0	0	0	41	16	65	7.89529	0.000274877	0.0231662	up	NW_018743919.1	149353	149722	.	--	--	--	--	--	--	--	--	--	--
gene-LOC110695656	1	1.2	1.19	2.03	11.37	4.8	200	229	196	401	2120	788	2.38294	0.000277728	0.0233458	up	NW_018744304.1	3987180	4003777	-	LOC110695656	--	K20478 golgin subfamily B member 1 | (RefSeq) uncharacterized protein PF11_0213 isoform X1 (A)	--	uncharacterized protein PF11_0213 isoform X1 [Chenopodium quinoa]	--	SubName: Full=Uncharacterized protein {ECO:0000313|EMBL:KNA17214.1};	--	--	--
gene-LOC110703812	14.41	14.33	9.63	3.77	5.37	2.07	646	612	354	167	224	76	-1.77685	0.000278941	0.0233869	down	NW_018744784.1	114892	119868	-	LOC110703812	--	K01940 argininosuccinate synthase [EC:6.3.4.5] | (RefSeq) argininosuccinate synthase, chloroplastic-like (A)	ko00220: Arginine biosynthesis; ko00250: Alanine, aspartate and glutamate metabolism; ko01230: Biosynthesis of amino acids	argininosuccinate synthase, chloroplastic-like [Chenopodium quinoa]	RecName: Full=Argininosuccinate synthase, chloroplastic; EC=6.3.4.5; AltName: Full=Citrulline--aspartate ligase; Flags: Precursor;	SubName: Full=Argininosuccinate synthase {ECO:0000313|EMBL:OVA17538.1};	Argininosuccinate synthase	GO:0009507,chloroplast; GO:0009570,chloroplast stroma; GO:0005737,cytoplasm; GO:0009536,plastid; GO:0004055,argininosuccinate synthase activity; GO:0005524,ATP binding; GO:0006526,arginine biosynthetic process; GO:0000053,argininosuccinate metabolic process; GO:0000050,urea cycle	PF00764.19:Arginosuccinate synthase
novel.2352	4.37794	5.62489	4.05373	10.9726	8.6083	11.3698	434	528	409	1108	895	1062	1.20388	0.00028052	0.0234586	up	NW_018742959.1	1265158	1266243	.	--	--	--	--	hypothetical protein BVRB_008000 [Beta vulgaris subsp. vulgaris]	RecName: Full=Rapid alkalinization factor; Short=NtRALF; Flags: Precursor;	SubName: Full=Uncharacterized protein {ECO:0000313|EMBL:KMS95461.1};	--	GO:0005576,extracellular region; GO:0005622,intracellular; GO:0005179,hormone activity; GO:0004871,NA; GO:0019722,calcium-mediated signaling	PF05498.11:Rapid ALkalinization Factor (RALF)
gene-LOC110703292	11.11	10.52	19.67	27.16	61.6	76.84	642	579	932	1550	3314	3639	1.99139	0.000281276	0.0234612	up	NW_018744718.1	1493343	1499015	-	LOC110703292	--	--	--	boron transporter 4-like [Chenopodium quinoa]	RecName: Full=Boron transporter 4;	SubName: Full=Uncharacterized protein {ECO:0000313|EMBL:KNA11377.1};	Na+-independent Cl/HCO3 exchanger AE1 and related transporters (SLC4 family)	GO:0005887,integral component of plasma membrane; GO:0005886,plasma membrane; GO:0015301,anion:anion antiporter activity; GO:0080139,borate efflux transmembrane transporter activity; GO:0005452,inorganic anion exchanger activity; GO:0046713,borate transport; GO:0080029,cellular response to boron-containing substance levels; GO:0051453,regulation of intracellular pH	PF00955.21:HCO3- transporter family
gene-LOC110727926	6.52	8.41	0	0	0	0	276	339	0	0	0	0	-9.97235	0.000286396	0.0237939	down	NW_018742914.1	4185657	4188535	+	LOC110727926	--	K01179 endoglucanase [EC:3.2.1.4] | (RefSeq) endoglucanase 17-like (A)	ko00500: Starch and sucrose metabolism	endoglucanase 17-like [Chenopodium quinoa]	RecName: Full=Endoglucanase 17; EC=3.2.1.4; AltName: Full=Endo-1,4-beta glucanase 17; Flags: Precursor;	RecName: Full=Endoglucanase {ECO:0000256|RuleBase:RU361166}; EC=3.2.1.4 {ECO:0000256|RuleBase:RU361166};	--	GO:0005576,extracellular region; GO:0008810,cellulase activity; GO:0071555,cell wall organization; GO:0030245,cellulose catabolic process	PF00759.19:Glycosyl hydrolase family 9
gene-LOC110697046	19.93	19.85	17.98	35.37	45.21	65.49	618	586	457	1083	1305	1664	1.35748	0.000287428	0.0237939	up	NW_018744460.1	202321	205597	+	LOC110697046	--	K09841 xanthoxin dehydrogenase [EC:1.1.1.288] | (RefSeq) xanthoxin dehydrogenase-like (A)	ko00906: Carotenoid biosynthesis	xanthoxin dehydrogenase-like [Chenopodium quinoa]	RecName: Full=Xanthoxin dehydrogenase; EC=1.1.1.288; AltName: Full=Protein GLUCOSE INSENSITIVE 1; AltName: Full=Protein IMPAIRED SUCROSE INDUCTION 4; AltName: Full=Protein SALOBRENO 3; AltName: Full=Protein SALT RESISTANT 1; AltName: Full=Protein SUGAR INSENSITIVE 4; AltName: Full=Short-chain alcohol dehydrogenase ABA2; AltName: Full=Short-chain dehydrogenase reductase 1; Short=AtSDR1; AltName: F…	SubName: Full=Uncharacterized protein {ECO:0000313|EMBL:KNA25355.1}; Flags: Fragment;	Reductases with broad range of substrate specificities	GO:0005829,cytosol; GO:0004022,alcohol dehydrogenase (NAD) activity; GO:0010301,xanthoxin dehydrogenase activity; GO:0009688,abscisic acid biosynthetic process; GO:0006561,proline biosynthetic process; GO:0010115,regulation of abscisic acid biosynthetic process; GO:0009750,response to fructose; GO:0009408,response to heat; GO:0009414,response to water deprivation; GO:0010182,sugar mediated signal…	PF13561.6:Enoyl-(Acyl carrier protein) reductase
novel.4570	0	0	0	0.59858	0.373458	2.94411	0	0	0	23	15	104	8.16936	0.000287471	0.0237939	up	NW_018743920.1	1726056	1726466	.	--	--	--	--	--	--	--	--	--	--
gene-LOC110725847	24.01	25.63	25.16	38.21	92.32	78.25	1079	1097	927	1696	3863	2882	1.47427	0.000291754	0.0240868	up	NW_018742815.1	4967269	4973682	+	LOC110725847	--	K01590 histidine decarboxylase [EC:4.1.1.22] | (RefSeq) serine decarboxylase-like (A)	ko00340: Histidine metabolism	serine decarboxylase-like [Chenopodium quinoa]	RecName: Full=Serine decarboxylase; Short=AtSDC; EC=4.1.1.-; AltName: Full=Protein EMBRYO DEFECTIVE 1075; AltName: Full=Serine decarboxylase 1; Short=AtSDC1;	SubName: Full=Uncharacterized protein {ECO:0000313|EMBL:KNA22216.1};	Glutamate decarboxylase and related proteins	GO:0005829,cytosol; GO:0005886,plasma membrane; GO:0016831,carboxy-lyase activity; GO:0030170,pyridoxal phosphate binding; GO:0019752,carboxylic acid metabolic process; GO:0006580,ethanolamine metabolic process	PF00282.19:Pyridoxal-dependent decarboxylase conserved domain
gene-LOC110685487	41.35	40.09	48.46	83.91	164.52	489.44	533	492	512	1068	1974	5169	2.53249	0.000295131	0.0243036	up	NW_018743815.1	3104	4005	-	LOC110685487	--	--	--	uncharacterized protein LOC110685487 [Chenopodium quinoa]	--	SubName: Full=Uncharacterized protein {ECO:0000313|EMBL:KMT11885.1};	--	--	--
gene-LOC110713561	17.52	21.51	26.4	41.13	95.74	67.7	302	353	373	700	1536	956	1.62518	0.000298905	0.024552	up	NW_018745448.1	26443	27279	+	LOC110713561	--	--	--	uncharacterized protein LOC110713561 [Chenopodium quinoa]	--	SubName: Full=Uncharacterized protein {ECO:0000313|EMBL:KNA21801.1};	--	--	PF03087.14:Arabidopsis protein of unknown function
gene-LOC110726336	2.24	2.37	2.54	4.48	10.14	8.94	143	144	133	282	602	467	1.71182	0.000299672	0.0245526	up	NW_018742879.1	382908	386005	+	LOC110726336	--	K07195 exocyst complex component 7 | (RefSeq) exocyst complex component EXO70E2-like (A)	--	exocyst complex component EXO70E2-like [Chenopodium quinoa]	RecName: Full=Exocyst complex component EXO70E2 {ECO:0000303|PubMed:16942608}; Short=AtExo70e2 {ECO:0000303|PubMed:16942608}; AltName: Full=Exocyst subunit Exo70 family protein E2 {ECO:0000303|PubMed:16942608};	SubName: Full=Uncharacterized protein {ECO:0000313|EMBL:KNA24811.1};	Exocyst component protein and related proteins	GO:0005829,cytosol; GO:0012505,endomembrane system; GO:0000145,exocyst; GO:0070062,extracellular exosome; GO:0005576,extracellular region; GO:0005886,plasma membrane; GO:0006887,exocytosis; GO:1903553,positive regulation of extracellular exosome assembly; GO:0015031,protein transport; GO:1903533,regulation of protein targeting	PF03081.15:Exo70 exocyst complex subunit
gene-LOC110695223	3.46	3.14	2.24	5.92	11.88	6.31	598	516	318	1010	1911	893	1.44159	0.000301042	0.0246026	up	NW_018744290.1	1996713	2017002	+	LOC110695223	--	K10882 crossover junction endonuclease EME1 [EC:3.1.22.-] | (RefSeq) crossover junction endonuclease EME1B-like isoform X1 (A)	ko03440: Homologous recombination	crossover junction endonuclease EME1B-like isoform X1 [Chenopodium quinoa]	RecName: Full=Crossover junction endonuclease EME1B; EC=3.1.22.-; AltName: Full=Essential meiotic endonuclease 1B; Short=AtEME1B;	SubName: Full=Uncharacterized protein {ECO:0000313|EMBL:KNA23492.1};	--	GO:0048476,Holliday junction resolvase complex; GO:0005634,nucleus; GO:0003677,DNA binding; GO:0004519,endonuclease activity; GO:0046872,metal ion binding; GO:0051301,cell division; GO:0006310,DNA recombination; GO:0006281,DNA repair; GO:0051321,meiotic cell cycle	--
gene-LOC110691979	78.67	80.55	37.44	136.87	184.04	207.17	3350	3266	1307	5755	7295	7228	1.45284	0.000305092	0.0248707	up	NW_018744092.1	4828513	4832719	+	LOC110691979	--	K09828 Delta24-sterol reductase [EC:1.3.1.72 1.3.1.-] | (RefSeq) delta(24)-sterol reductase-like (A)	ko00100: Steroid biosynthesis	delta(24)-sterol reductase-like [Chenopodium quinoa]	RecName: Full=Delta(24)-sterol reductase; EC=1.3.1.72; AltName: Full=Cell elongation protein diminuto;	SubName: Full=Uncharacterized protein {ECO:0000313|EMBL:KNA18210.1};	FAD-binding protein DIMINUTO	GO:0016021,integral component of membrane; GO:0005516,calmodulin binding; GO:0050614,delta24-sterol reductase activity; GO:0050660,flavin adenine dinucleotide binding; GO:0016614,oxidoreductase activity, acting on CH-OH group of donors	PF01565.23:FAD binding domain
gene-LOC110717755	1.28	1.37	2.05	0.08	0.24	0.31	107	109	140	7	19	21	-2.89848	0.000309499	0.0251035	down	NW_018745684.1	4933793	4937845	-	LOC110717755	--	K13430 serine/threonine-protein kinase PBS1 [EC:2.7.11.1] | (RefSeq) probable serine/threonine-protein kinase PBL7 isoform X1 (A)	ko04626: Plant-pathogen interaction	serine/threonine-protein kinase-like protein ACR4 [Chenopodium quinoa]	RecName: Full=Serine/threonine-protein kinase-like protein ACR4; EC=2.7.11.1; AltName: Full=Protein CRINKLY 4; Short=AtCR4; Flags: Precursor;	SubName: Full=serine/threonine-protein kinase-like protein ACR4 {ECO:0000313|RefSeq:XP_018806220.1, ECO:0000313|RefSeq:XP_018806229.1};	--	GO:0009986,cell surface; GO:0030139,endocytic vesicle; GO:0016021,integral component of membrane; GO:0032585,multivesicular body membrane; GO:0005886,plasma membrane; GO:0005524,ATP binding; GO:0042803,protein homodimerization activity; GO:0004674,protein serine/threonine kinase activity; GO:0019199,transmembrane receptor protein kinase activity; GO:0009793,embryo development ending in seed dorma…	PF00069.25:Protein kinase domain
gene-LOC110734130	9.09	11.13	0	0	0	0	277	323	0	0	0	0	-9.93578	0.000311024	0.0251218	down	NW_018743212.1	2554229	2556227	-	LOC110734130	--	--	--	--	--	--	--	--	--
gene-LOC110730666	6.05	8.36	2.06	17.42	29	24.37	254	334	71	722	1133	838	2.12785	0.000311276	0.0251218	up	NW_018743047.1	609997	614908	+	LOC110730666	--	--	--	ureide permease 2-like [Chenopodium quinoa]	RecName: Full=Ureide permease 2 {ECO:0000303|PubMed:11971139}; Short=AtUPS2 {ECO:0000303|PubMed:11971139};	SubName: Full=Uncharacterized protein {ECO:0000313|EMBL:KMS99280.1};	--	GO:0016021,integral component of membrane; GO:0005886,plasma membrane; GO:0005274,allantoin:proton symporter activity; GO:0005524,ATP binding; GO:0015210,uracil transmembrane transporter activity; GO:0015720,allantoin transport; GO:0043100,pyrimidine nucleobase salvage; GO:0015857,uracil transport	PF07168.11:Ureide permease
novel.7209	0	0	0	0.78575	0.058687	1.94768	0	0	0	52	4	120	8.47216	0.000316719	0.0254349	up	NW_018745003.1	442510	443221	.	--	--	K22378 E3 ubiquitin-protein ligase RNF181 [EC:2.3.2.27] | (RefSeq) E3 ubiquitin-protein ligase RING1-like (A)	--	hypothetical protein BVRB_8g197390 [Beta vulgaris subsp. vulgaris]	RecName: Full=E3 ubiquitin-protein ligase RING1; EC=2.3.2.27; AltName: Full=RING finger protein 1; AltName: Full=RING-type E3 ubiquitin transferase RING1 {ECO:0000305};	SubName: Full=Uncharacterized protein {ECO:0000313|EMBL:KNA10973.1};	FOG: Predicted E3 ubiquitin ligase	GO:0046872,metal ion binding; GO:0004842,ubiquitin-protein transferase activity; GO:0090378,seed trichome elongation	PF13639.6:Ring finger domain
gene-LOC110696649	50.2	50.69	53.7	86.27	102	131.51	4650	4471	4078	7891	8796	9982	1.06141	0.000317727	0.0254349	up	NW_018744367.1	9327766	9333701	+	LOC110696649	--	K07198 5'-AMP-activated protein kinase, catalytic alpha subunit [EC:2.7.11.11] | (RefSeq) CBL-interacting serine/threonine-protein kinase 20-like (A)	--	CBL-interacting serine/threonine-protein kinase 6-like [Chenopodium quinoa]	RecName: Full=CBL-interacting serine/threonine-protein kinase 6; EC=2.7.11.1; AltName: Full=SNF1-related kinase 3.14; AltName: Full=SOS2-like protein kinase PKS4; AltName: Full=SOS3-interacting protein 3;	RecName: Full=Non-specific serine/threonine protein kinase {ECO:0000256|SAAS:SAAS00351747}; EC=2.7.11.1 {ECO:0000256|SAAS:SAAS00351747};	Serine/threonine protein kinase	GO:0005783,endoplasmic reticulum; GO:0005622,intracellular; GO:0005524,ATP binding; GO:0004674,protein serine/threonine kinase activity; GO:0010540,basipetal auxin transport; GO:0042538,hyperosmotic salinity response; GO:0035556,intracellular signal transduction; GO:0007275,multicellular organism development; GO:0018105,peptidyl-serine phosphorylation; GO:0018107,peptidyl-threonine phosphorylatio…	PF00069.25:Protein kinase domain
gene-LOC110730335	9.98	9.52	18.51	37.73	44.89	36.23	240	218	365	896	1005	714	1.6309	0.000317879	0.0254349	up	NW_018742205.1	5161465	5162632	-	LOC110730335	--	--	--	NDR1/HIN1-like protein 1 [Chenopodium quinoa]	RecName: Full=NDR1/HIN1-like protein 1 {ECO:0000303|Ref.1};	SubName: Full=Uncharacterized protein {ECO:0000313|EMBL:KNA06098.1};	--	GO:0046658,anchored component of plasma membrane; GO:0016021,integral component of membrane; GO:0009506,plasmodesma; GO:0004871,NA; GO:0051607,defense response to virus	PF03168.13:Late embryogenesis abundant protein
gene-LOC110706613	11.95	11.4	7.01	15.87	74.04	59.74	283	257	136	371	1632	1159	2.29892	0.000319045	0.0254349	up	NW_018744988.1	1817673	1818822	-	LOC110706613	--	--	--	protein EXORDIUM-like [Chenopodium quinoa]	RecName: Full=Protein EXORDIUM; Flags: Precursor;	SubName: Full=Uncharacterized protein {ECO:0000313|EMBL:KNA15759.1};	--	GO:0048046,apoplast; GO:0005618,cell wall; GO:0005615,extracellular space; GO:0005794,Golgi apparatus; GO:0009505,plant-type cell wall; GO:0009741,response to brassinosteroid	PF04674.12:Phosphate-induced protein 1 conserved region
gene-LOC110690672	653.4	614.32	482.7	39.12	238.35	60.93	9135	8178	5532	540	3102	698	-2.41576	0.000319086	0.0254349	down	NW_018744062.1	912846	913927	+	LOC110690672	--	--	--	non-specific lipid-transfer protein-like [Chenopodium quinoa]	RecName: Full=Non-specific lipid-transfer protein; Short=LTP; Flags: Precursor;	RecName: Full=Non-specific lipid-transfer protein {ECO:0000256|RuleBase:RU000628};	--	GO:0008289,lipid binding; GO:0050832,defense response to fungus; GO:0031640,killing of cells of other organism; GO:0006869,lipid transport	PF00234.22:Protease inhibitor/seed storage/LTP family
novel.7085	0.051137	0.831677	7.18898	0	0.048419	0	5	63	575	0	5	0	-7.31733	0.000328924	0.0261547	down	NW_018744991.1	2497638	2498500	.	--	--	--	--	--	--	--	--	--	--
gene-LOC110715233	28.62	34.83	47.53	11.68	3.15	5.1	459	532	625	185	47	67	-2.44878	0.000331783	0.0263174	down	NW_018745485.1	1619981	1624173	+	LOC110715233	--	K17411 small subunit ribosomal protein S33 | (RefSeq) uncharacterized protein LOC110715233 (A)	--	uncharacterized protein LOC110715233 [Chenopodium quinoa]	--	SubName: Full=Mitochondrial isoform 1 {ECO:0000313|EMBL:EOY21169.1};	Mitochondrial ribosomal protein S27	--	PF08293.11:Mitochondrial ribosomal subunit S27
novel.7910	0	0.078751	0	1.44328	0.85276	3.8466	0	2	0	40	25	98	6.51811	0.000333854	0.0264169	up	NW_018745323.1	398762	399055	.	--	--	--	--	hypothetical protein glysoja_044789 [Glycine soja]	--	SubName: Full=Uncharacterized protein {ECO:0000313|EMBL:KHN25192.1};	--	--	--
gene-LOC110736561	4.03	3.79	1.65	6.21	22.38	19.53	182	163	61	277	941	723	2.35491	0.000335977	0.0265201	up	NW_018743292.1	4761350	4766924	-	LOC110736561	--	--	--	MAR-binding filament-like protein 1 isoform X1 [Chenopodium quinoa]	RecName: Full=Nuclear envelope-associated protein 2 {ECO:0000303|PubMed:27630107}; Short=AtNEAP2 {ECO:0000303|PubMed:27630107};	SubName: Full=Uncharacterized protein {ECO:0000313|EMBL:KNA17314.1};	--	GO:0016021,integral component of membrane; GO:0005635,nuclear envelope; GO:0005637,nuclear inner membrane; GO:0005654,nucleoplasm; GO:0043621,protein self-association	PF09787.9:Golgin subfamily A member 5
gene-LOC110682583	13.99	10.72	17.27	5.27	5.11	2.97	570	416	577	212	194	99	-1.65842	0.000336996	0.0265328	down	NW_018742244.1	3704582	3711711	-	LOC110682583	--	K03011 DNA-directed RNA polymerase II subunit RPB3 | (RefSeq) DNA-directed RNA polymerases II, IV and V subunit 3-like (A)	ko03020: RNA polymerase	DNA-directed RNA polymerases II, IV and V subunit 3-like [Chenopodium quinoa]	RecName: Full=DNA-directed RNA polymerases II, IV and V subunit 3; AltName: Full=DNA-directed RNA polymerase II 36 kDa polypeptide A; AltName: Full=DNA-directed RNA polymerase II subunit RPB3-A; Short=RNA polymerase II subunit 3-A; Short=RNA polymerase II subunit B3-A;	SubName: Full=Uncharacterized protein {ECO:0000313|EMBL:KNA21560.1};	RNA polymerase II, subunit POLR2C/RPB3	GO:0005737,cytoplasm; GO:0005665,RNA polymerase II, core complex; GO:0000418,RNA polymerase IV complex; GO:0000419,RNA polymerase V complex; GO:0005730,nucleolus; GO:0005634,nucleus; GO:0003677,DNA binding; GO:0003899,DNA-directed 5'-3' RNA polymerase activity; GO:0046983,protein dimerization activity; GO:0010374,stomatal complex development; GO:0010375,stomatal complex patterning; GO:0006366,tra…	PF01000.26:RNA polymerase Rpb3/RpoA insert domain
novel.6645	2.34572	3.22783	2.4528	0.969341	0.979368	1.16517	532	692	565	224	233	249	-1.30775	0.000337778	0.0265328	down	NW_018744745.1	240341	242821	.	--	--	K19037 E3 ubiquitin-protein ligase ATL23 [EC:2.3.2.27] | (RefSeq) E3 ubiquitin-protein ligase ATL23 (A)	--	hypothetical protein SOVF_111720 [Spinacia oleracea]	RecName: Full=E3 ubiquitin-protein ligase ATL23; EC=2.3.2.27 {ECO:0000269|PubMed:15644464, ECO:0000269|PubMed:16339806}; AltName: Full=RING-H2 finger protein ATL23; AltName: Full=RING-type E3 ubiquitin transferase ATL23 {ECO:0000305};	SubName: Full=Uncharacterized protein {ECO:0000313|EMBL:KNA13966.1};	FOG: Predicted E3 ubiquitin ligase	GO:0016021,integral component of membrane; GO:0046872,metal ion binding; GO:0061630,ubiquitin protein ligase activity; GO:0004842,ubiquitin-protein transferase activity; GO:0043161,proteasome-mediated ubiquitin-dependent protein catabolic process; GO:0016567,protein ubiquitination	PF13639.6:Ring finger domain
gene-LOC110736340	2.79	2.64	0	11.66	20.47	164.33	61	55	0	252	417	2947	5.2711	0.000340437	0.0266411	up	NW_018743292.1	2452164	2453707	+	LOC110736340	--	--	--	uncharacterized protein LOC110736340 [Chenopodium quinoa]	--	SubName: Full=Uncharacterized protein {ECO:0000313|EMBL:KMS97965.1};	--	--	--
gene-LOC110715190	7.65	7.54	9.58	2.57	3.45	2.89	262	246	269	87	110	81	-1.47866	0.000340804	0.0266411	down	NW_018745482.1	245883	258635	+	LOC110715190	--	K10756 replication factor C subunit 3/5 | (RefSeq) replication factor C subunit 3-like (A)	ko03030: DNA replication; ko03420: Nucleotide excision repair; ko03430: Mismatch repair	replication factor C subunit 3-like [Chenopodium quinoa]	RecName: Full=Replication factor C subunit 3; Short=AtRFC3; AltName: Full=Activator 1 subunit 3; AltName: Full=Protein EMBRYO DEFECTIVE 161; AltName: Full=Protein EMBRYO DEFECTIVE 251; AltName: Full=Protein EMBRYO DEFECTIVE 2775;	RecName: Full=Non-specific lipid-transfer protein {ECO:0000256|RuleBase:RU000628};	Replication factor C, subunit RFC3	GO:0005663,DNA replication factor C complex; GO:0005634,nucleus; GO:0005524,ATP binding; GO:0003677,DNA binding; GO:0006281,DNA repair; GO:0006261,DNA-dependent DNA replication	PF13177.6:DNA polymerase III, delta subunit
novel.5617	0	0	0	0.381962	0.407396	1.03836	0	0	0	24	27	60	7.7525	0.000345491	0.0269425	up	NW_018744304.1	234741	236788	+	--	--	--	--	--	--	--	--	--	--
gene-LOC110732999	46.2	46.89	3.58	4.78	3.55	2.44	2771	2678	176	283	198	120	-3.11568	0.000348314	0.0270973	down	NW_018743196.1	795797	800823	+	LOC110732999	--	K01897 long-chain acyl-CoA synthetase [EC:6.2.1.3] | (RefSeq) long chain acyl-CoA synthetase 1-like (A)	ko00061: Fatty acid biosynthesis; ko00071: Fatty acid degradation; ko01212: Fatty acid metabolism; ko04146: Peroxisome	long chain acyl-CoA synthetase 1-like [Chenopodium quinoa]	RecName: Full=Long chain acyl-CoA synthetase 1; EC=6.2.1.3; AltName: Full=Protein ECERIFERUM 8;	SubName: Full=Uncharacterized protein {ECO:0000313|EMBL:KNA19626.1};	Long-chain acyl-CoA synthetases (AMP-forming)	GO:0005783,endoplasmic reticulum; GO:0005524,ATP binding; GO:0102391,decanoate-CoA ligase activity; GO:0004467,long-chain fatty acid-CoA ligase activity; GO:0031957,very long-chain fatty acid-CoA ligase activity; GO:0010143,cutin biosynthetic process; GO:0006631,fatty acid metabolic process; GO:0010025,wax biosynthetic process	PF00501.28:AMP-binding enzyme
novel.6339	1.84704	24.6421	3.34492	37.1043	59.1625	274.274	182	2293	334	3715	6100	25386	3.85112	0.000351366	0.0272218	up	NW_018744633.1	5656338	5658794	-	--	--	--	--	--	--	--	--	--	--
gene-LOC110723203	7.71	8.23	8.76	1.77	2	0.3	658	669	613	149	159	21	-2.61849	0.000351596	0.0272218	down	NW_018742720.1	2949336	2953895	-	LOC110723203	--	K13420 LRR receptor-like serine/threonine-protein kinase FLS2 [EC:2.7.11.1] | (RefSeq) LRR receptor-like serine/threonine-protein kinase FLS2 (A)	ko04016: MAPK signaling pathway - plant; ko04626: Plant-pathogen interaction	probable LRR receptor-like serine/threonine-protein kinase IRK [Chenopodium quinoa]	RecName: Full=Probable LRR receptor-like serine/threonine-protein kinase IRK {ECO:0000305}; EC=2.7.11.1 {ECO:0000305}; AltName: Full=Inflorescence and root apices receptor-like kinase {ECO:0000303|Ref.1}; Flags: Precursor;	SubName: Full=Uncharacterized protein {ECO:0000313|EMBL:KNA18926.1};	--	GO:0016021,integral component of membrane; GO:0005886,plasma membrane; GO:0005524,ATP binding; GO:0004672,protein kinase activity	PF13855.6:Leucine rich repeat
gene-LOC110709992	130.72	143.8	6.68	10.96	1.42	4.51	1981	2075	83	164	20	56	-3.96453	0.000354696	0.0273962	down	NW_018745105.1	3234366	3235641	+	LOC110709992	--	K11251 histone H2A | (RefSeq) histone H2A, sperm-like (A)	--	histone H2A, sperm-like [Chenopodium quinoa]	RecName: Full=Histone H2AX;	RecName: Full=Histone H2A {ECO:0000256|RuleBase:RU003767};	Histone 2A	GO:0000786,nucleosome; GO:0005634,nucleus; GO:0003677,DNA binding; GO:0046982,protein heterodimerization activity	PF16211.5:C-terminus of histone H2A
novel.3943	0.116094	0.075651	0	1.2335	0.823043	3.22047	6	4	0	59	40	141	4.80729	0.000355691	0.0274077	up	NW_018743593.1	2337175	2337680	.	--	--	--	--	--	--	--	--	--	--
gene-LOC110705837	7.43	5.73	8.57	14.7	22.29	16.65	369	271	349	721	1031	678	1.29524	0.000360631	0.0277223	up	NW_018742410.1	1201142	1206082	+	LOC110705837	--	K14491 two-component response regulator ARR-B family | (RefSeq) two-component response regulator ARR2-like isoform X1 (A)	ko04075: Plant hormone signal transduction	two-component response regulator ARR12-like isoform X1 [Chenopodium quinoa]	RecName: Full=Two-component response regulator ARR12;	RecName: Full=Two-component response regulator {ECO:0000256|PIRNR:PIRNR036392};	GATA-4/5/6 transcription factors	GO:0005634,nucleus; GO:0003677,DNA binding; GO:0003700,DNA-binding transcription factor activity; GO:0000156,phosphorelay response regulator activity; GO:0071368,cellular response to cytokinin stimulus; GO:0009736,cytokinin-activated signaling pathway; GO:0010492,maintenance of shoot apical meristem identity; GO:0080022,primary root development; GO:0031537,regulation of anthocyanin metabolic proc…	PF00072.24:Response regulator receiver domain
gene-LOC110699237	7.97	7.51	6.37	13.45	32.88	18.15	351	315	230	585	1348	655	1.54821	0.000365368	0.0280199	up	NW_018744582.1	1313596	1315734	-	LOC110699237	--	K19747 BAHD acyltransferase [EC:2.3.1.-] | (RefSeq) BAHD acyltransferase DCR-like (A)	--	uncharacterized acetyltransferase At3g50280-like [Chenopodium quinoa]	RecName: Full=Uncharacterized acetyltransferase At3g50280; EC=2.3.1.-;	SubName: Full=Uncharacterized protein {ECO:0000313|EMBL:KNA16130.1};	--	GO:0016747,transferase activity, transferring acyl groups other than amino-acyl groups	PF02458.15:Transferase family
gene-LOC110692678	23.95	27.49	9.9	52.93	112.47	55.11	906	990	307	1977	3960	1708	1.84928	0.000366812	0.0280642	up	NW_018744128.1	333507	339482	+	LOC110692678	--	K03327 multidrug resistance protein, MATE family | (RefSeq) protein DETOXIFICATION 27-like (A)	--	protein DETOXIFICATION 27-like [Chenopodium quinoa]	RecName: Full=Protein DETOXIFICATION 27 {ECO:0000303|PubMed:11739388}; Short=AtDTX27 {ECO:0000303|PubMed:11739388}; AltName: Full=Multidrug and toxic compound extrusion protein 27 {ECO:0000305}; Short=MATE protein 27 {ECO:0000305};	RecName: Full=Protein DETOXIFICATION {ECO:0000256|RuleBase:RU004914}; AltName: Full=Multidrug and toxic compound extrusion protein {ECO:0000256|RuleBase:RU004914};	Uncharacterized membrane protein, predicted efflux pump	GO:0016021,integral component of membrane; GO:0015297,antiporter activity; GO:0015238,drug transmembrane transporter activity; GO:0006855,drug transmembrane transport	PF01554.18:MatE
gene-LOC110693146	1.38	1.65	5.98	0.19	0.41	0.34	79	90	280	11	22	16	-3.29218	0.000374404	0.0285774	down	NW_018744143.1	153198	156649	+	LOC110693146	--	--	--	uncharacterized protein LOC110693146 [Chenopodium quinoa]	--	SubName: Full=Uncharacterized protein {ECO:0000313|EMBL:KNA13254.1};	--	GO:0003676,nucleic acid binding	PF00096.26:Zinc finger, C2H2 type
gene-LOC110719466	166.81	179.97	192.39	280.97	411.17	458.29	3263	3352	3085	5427	7487	7345	1.09836	0.000376484	0.0286686	up	NW_018742484.1	4154578	4157029	-	LOC110719466	--	--	--	remorin-like [Chenopodium quinoa]	RecName: Full=Remorin; AltName: Full=DNA-binding protein;	SubName: Full=Uncharacterized protein {ECO:0000313|EMBL:KNA19891.1};	--	GO:0005886,plasma membrane	PF03763.13:Remorin, C-terminal region
gene-LOC110710707	189.61	206.68	110.31	76.34	50.29	63.91	5091	5284	2428	2024	1257	1406	-1.37253	0.00038139	0.028974	down	NW_018745177.1	3212453	3215648	+	LOC110710707	--	K02987 small subunit ribosomal protein S4e | (RefSeq) 40S ribosomal protein S4-3-like (A)	ko03010: Ribosome	40S ribosomal protein S4-3-like [Chenopodium quinoa]	RecName: Full=40S ribosomal protein S4;	RecName: Full=40S ribosomal protein S4 {ECO:0000256|PIRNR:PIRNR002116};	40S ribosomal protein S4	GO:0005840,ribosome; GO:0019843,rRNA binding; GO:0003735,structural constituent of ribosome; GO:0006412,translation	PF00900.20:Ribosomal family S4e
gene-LOC110681922	21.22	20.94	10.65	41.5	50.2	39.04	727	683	299	1404	1601	1096	1.32754	0.00038355	0.0290699	up	NW_018743574.1	1625782	1630094	-	LOC110681922	--	--	--	uncharacterized protein LOC110681922 isoform X1 [Chenopodium quinoa]	--	SubName: Full=Uncharacterized protein {ECO:0000313|EMBL:KNA18353.1};	--	GO:0004222,metalloendopeptidase activity; GO:0071586,CAAX-box protein processing	PF01435.18:Peptidase family M48
gene-LOC110702488	12.32	14.39	10.66	25.89	25.64	22.74	355	395	252	737	688	537	1.00624	0.000391323	0.0295897	up	NW_018744693.1	1244968	1255036	-	LOC110702488	--	K19038 E3 ubiquitin-protein ligase ATL41 [EC:2.3.2.27] | (RefSeq) E3 ubiquitin-protein ligase ATL41-like (A)	--	LOW QUALITY PROTEIN: E3 ubiquitin-protein ligase At4g11680-like [Chenopodium quinoa]	RecName: Full=E3 ubiquitin-protein ligase At4g11680; EC=2.3.2.27; AltName: Full=RING finger protein At4g11680; AltName: Full=RING-type E3 ubiquitin transferase At4g11680 {ECO:0000305};	SubName: Full=Uncharacterized protein {ECO:0000313|EMBL:KNA25454.1};	FOG: Predicted E3 ubiquitin ligase	GO:0016021,integral component of membrane; GO:0005774,vacuolar membrane; GO:0046872,metal ion binding; GO:0061630,ubiquitin protein ligase activity; GO:0043161,proteasome-mediated ubiquitin-dependent protein catabolic process	PF13639.6:Ring finger domain
gene-LOC110729089	28.68	33.14	35.7	54.96	72.37	86.41	1379	1517	1407	2609	3239	3404	1.13913	0.000397447	0.0299129	up	NW_018742969.1	389797	394414	+	LOC110729089	--	K10781 fatty acyl-ACP thioesterase B [EC:3.1.2.14 3.1.2.21] | (RefSeq) palmitoyl-acyl carrier protein thioesterase, chloroplastic-like (A)	ko00061: Fatty acid biosynthesis; ko01212: Fatty acid metabolism	palmitoyl-acyl carrier protein thioesterase, chloroplastic-like [Chenopodium quinoa]	RecName: Full=Palmitoyl-acyl carrier protein thioesterase, chloroplastic; EC=3.1.2.-; AltName: Full=16:0-acyl-carrier protein thioesterase; Short=16:0-ACP thioesterase; AltName: Full=Acyl-[acyl-carrier-protein] hydrolase; AltName: Full=PATE; Flags: Precursor;	RecName: Full=Acyl-[acyl-carrier-protein] hydrolase {ECO:0000256|RuleBase:RU363096}; EC=3.1.2.- {ECO:0000256|RuleBase:RU363096};	--	GO:0009507,chloroplast; GO:0016790,thiolester hydrolase activity; GO:0006633,fatty acid biosynthetic process	PF01643.17:Acyl-ACP thioesterase
novel.4252	10.4444	10.1215	11.3675	4.26313	3.79369	4.73425	1010	926	1116	420	385	431	-1.28523	0.000405225	0.0303572	down	NW_018743813.1	615548	616606	-	--	--	--	--	--	--	--	--	--	--
gene-LOC110705767	351.36	401.78	12.71	21.01	0.39	1.29	12617	13738	374	745	13	38	-4.97256	0.000407342	0.0304453	down	NW_018744878.1	5734193	5736694	-	LOC110705767	--	--	--	vegetative cell wall protein gp1-like [Chenopodium quinoa]	RecName: Full=Major pollen allergen Lol p 11; AltName: Full=Allergen Lol p XI; AltName: Allergen=Lol p 11;	SubName: Full=Uncharacterized protein {ECO:0000313|EMBL:KNA18221.1};	--	GO:0005615,extracellular space	PF01190.17:Pollen proteins Ole e I like
gene-LOC110713869	113.25	105.79	70.51	218.71	187.71	181.82	2453	2182	1252	4678	3785	3227	1.04816	0.000411779	0.030706	up	NW_018745448.1	1924724	1929087	-	LOC110713869	--	K22547 arsenate reductase [EC:1.20.4.1] | (RefSeq) protein HIGH ARSENIC CONTENT 1, mitochondrial (A)	--	thiosulfate sulfurtransferase 16, chloroplastic-like [Chenopodium quinoa]	RecName: Full=Rhodanese-like domain-containing protein 15, chloroplastic; AltName: Full=Protein DARK INDUCIBLE 1; AltName: Full=Senescence-associated protein 1; Short=AtSEN1; AltName: Full=Sulfurtransferase 15; Short=AtStr15; Flags: Precursor;	SubName: Full=Uncharacterized protein {ECO:0000313|EMBL:KNA19181.1};	Rhodanese-related sulfurtransferase	GO:0009507,chloroplast; GO:0009579,thylakoid; GO:0007568,aging; GO:0009753,response to jasmonic acid; GO:0006979,response to oxidative stress; GO:0009611,response to wounding	PF00581.20:Rhodanese-like domain
gene-LOC110706999	13.44	10.79	0	0.06	0	0	437	334	0	2	0	0	-8.47417	0.000418701	0.031079	down	NW_018744991.1	3096784	3098362	+	LOC110706999	--	--	--	lysine-rich arabinogalactan protein 18-like [Chenopodium quinoa]	--	SubName: Full=Uncharacterized protein {ECO:0000313|EMBL:KNA23853.1};	--	--	--
gene-LOC110684425	3.81	2.58	2.85	0.29	0.4	0.6	93	60	57	7	9	12	-2.83424	0.000420296	0.0311259	down	NW_018743697.1	4985429	4987031	+	LOC110684425	--	K13993 HSP20 family protein | (RefSeq) 17.4 kDa class III heat shock protein-like (A)	ko04141: Protein processing in endoplasmic reticulum	17.4 kDa class III heat shock protein-like [Chenopodium quinoa]	RecName: Full=18.6 kDa class III heat shock protein; AltName: Full=18.6 kDa heat shock protein; Short=OsHsp18.6;	SubName: Full=Uncharacterized protein {ECO:0000313|EMBL:KNA07362.1};	Molecular chaperone (small heat-shock protein Hsp26/Hsp42)	GO:0005737,cytoplasm; GO:0009408,response to heat; GO:0009644,response to high light intensity; GO:0042542,response to hydrogen peroxide	PF00011.21:Hsp20/alpha crystallin family
gene-LOC110715192	17.8	18.59	9.84	27.32	52.87	46.52	938	933	425	1422	2594	2009	1.46777	0.000431145	0.0318565	up	NW_018745482.1	406281	414866	-	LOC110715192	--	K13863 solute carrier family 7 (cationic amino acid transporter), member 1 | (RefSeq) cationic amino acid transporter 2, vacuolar-like (A)	--	cationic amino acid transporter 2, vacuolar-like [Chenopodium quinoa]	RecName: Full=Cationic amino acid transporter 2, vacuolar;	SubName: Full=Uncharacterized protein {ECO:0000313|EMBL:KNA23514.1};	Amino acid transporters	GO:0016021,integral component of membrane; GO:0009705,plant-type vacuole membrane; GO:0005774,vacuolar membrane; GO:0005773,vacuole; GO:0015171,amino acid transmembrane transporter activity; GO:0080144,amino acid homeostasis	PF13520.6:Amino acid permease
gene-LOC110702591	18.06	16.07	12.57	7.61	5.72	5.24	719	609	410	299	212	171	-1.306	0.000433515	0.0319247	down	NW_018744693.1	2903450	2907741	+	LOC110702591	--	K01669 deoxyribodipyrimidine photo-lyase [EC:4.1.99.3] | (RefSeq) deoxyribodipyrimidine photo-lyase-like (A)	--	deoxyribodipyrimidine photo-lyase-like [Chenopodium quinoa]	RecName: Full=Deoxyribodipyrimidine photo-lyase; EC=4.1.99.3; AltName: Full=AtCPDII; AltName: Full=DNA photolyase; AltName: Full=Photoreactivating enzyme 1; AltName: Full=Protein UV RESISTANCE 2;	SubName: Full=CPD photolyase {ECO:0000313|EMBL:AAP31406.1};	Deoxyribodipyrimidine photolyase/cryptochrome	GO:0005634,nucleus; GO:0003904,deoxyribodipyrimidine photo-lyase activity; GO:0003677,DNA binding; GO:0003913,DNA photolyase activity; GO:0071949,FAD binding; GO:0000719,photoreactive repair; GO:0009650,UV protection	PF00875.18:DNA photolyase
gene-LOC110717702	10.67	6.08	4.36	1.48	1.3	0.68	212	115	71	29	24	11	-2.58831	0.000434042	0.0319247	down	NW_018745684.1	5003844	5005470	-	LOC110717702	--	--	--	MLP-like protein 31 [Chenopodium quinoa]	RecName: Full=MLP-like protein 31;	SubName: Full=Uncharacterized protein {ECO:0000313|EMBL:KNA05350.1};	--	GO:0006952,defense response; GO:0009607,response to biotic stimulus	PF00407.19:Pathogenesis-related protein Bet v I family
gene-LOC110738680	7.69	8.42	11.98	21.45	24.13	37.39	336	350	429	925	981	1338	1.57038	0.00043697	0.0319884	up	NW_018743391.1	1543598	1552960	+	LOC110738680	--	K14510 serine/threonine-protein kinase CTR1 [EC:2.7.11.1] | (RefSeq) serine/threonine-protein kinase CTR1-like (A)	ko04016: MAPK signaling pathway - plant; ko04075: Plant hormone signal transduction	dual specificity protein kinase shkC-like [Chenopodium quinoa]	RecName: Full=Integrin-linked protein kinase 1 {ECO:0000303|PubMed:27208244}; EC=2.7.11.1 {ECO:0000269|PubMed:27208244}; AltName: Full=Ankyrin protein kinase 1 {ECO:0000303|PubMed:12650621};	SubName: Full=Uncharacterized protein {ECO:0000313|EMBL:KNA22101.1};	Tyrosine kinase specific for activated (GTP-bound) p21cdc42Hs	GO:0009898,cytoplasmic side of plasma membrane; GO:0005783,endoplasmic reticulum; GO:0005789,endoplasmic reticulum membrane; GO:0005524,ATP binding; GO:0004672,protein kinase activity; GO:0004674,protein serine/threonine kinase activity; GO:0004712,protein serine/threonine/tyrosine kinase activity; GO:0004871,NA; GO:0045087,innate immune response; GO:0035556,intracellular signal transduction; GO:…	PF07714.17:Protein tyrosine kinase
gene-LOC110714075	48.83	46.25	23.3	14.6	10.12	12.72	928	837	363	274	179	198	-1.62174	0.000437604	0.0319884	down	NW_018745454.1	1420495	1423214	-	LOC110714075	--	K02893 large subunit ribosomal protein L23Ae | (RefSeq) 60S ribosomal protein L23A (A)	ko03010: Ribosome	60S ribosomal protein L23A [Chenopodium quinoa]	RecName: Full=60S ribosomal protein L23a;	SubName: Full=Uncharacterized protein {ECO:0000313|EMBL:EEF05190.1};	60s ribosomal protein L23	GO:0005840,ribosome; GO:0019843,rRNA binding; GO:0003735,structural constituent of ribosome; GO:0006412,translation	PF00276.20:Ribosomal protein L23
gene-LOC110723713	4.28	4.29	8.51	0.49	0.39	0	176	168	287	20	15	0	-4.29241	0.000437872	0.0319884	down	NW_018742204.1	22180416	22187937	-	LOC110723713	--	K03327 multidrug resistance protein, MATE family | (RefSeq) protein DETOXIFICATION 27-like (A)	--	protein DETOXIFICATION 27-like [Chenopodium quinoa]	RecName: Full=Protein DETOXIFICATION 27 {ECO:0000303|PubMed:11739388}; Short=AtDTX27 {ECO:0000303|PubMed:11739388}; AltName: Full=Multidrug and toxic compound extrusion protein 27 {ECO:0000305}; Short=MATE protein 27 {ECO:0000305};	RecName: Full=Protein DETOXIFICATION {ECO:0000256|RuleBase:RU004914}; AltName: Full=Multidrug and toxic compound extrusion protein {ECO:0000256|RuleBase:RU004914};	Uncharacterized membrane protein, predicted efflux pump	GO:0016021,integral component of membrane; GO:0015297,antiporter activity; GO:0015238,drug transmembrane transporter activity; GO:0006855,drug transmembrane transport	PF01554.18:MatE
gene-LOC110705021	68.09	62.86	48.38	125.47	126.24	242.15	1430	1257	833	2602	2468	4167	1.49492	0.000443006	0.032218	up	NW_018744874.1	952483	955573	+	LOC110705021	--	--	--	cold-regulated 413 plasma membrane protein 2-like [Chenopodium quinoa]	RecName: Full=Cold-regulated 413 plasma membrane protein 2; Short=AtCOR413-PM2;	SubName: Full=Uncharacterized protein {ECO:0000313|EMBL:KNA25855.1};	--	GO:0016021,integral component of membrane; GO:0005886,plasma membrane; GO:0005774,vacuolar membrane	PF05562.11:Cold acclimation protein WCOR413
gene-LOC110733633	265.85	271.55	180.29	116.19	71.26	99.82	4713	4584	2620	2034	1176	1450	-1.28436	0.000446849	0.0324246	down	NW_018743199.1	4571251	4573617	+	LOC110733633	--	K02949 small subunit ribosomal protein S11e | (RefSeq) 40S ribosomal protein S11-like (A)	ko03010: Ribosome	40S ribosomal protein S11-like [Chenopodium quinoa]	RecName: Full=40S ribosomal protein S11;	SubName: Full=40S ribosomal protein S11 {ECO:0000313|EMBL:CAK22271.1};	40S ribosomal protein S11	GO:0022627,cytosolic small ribosomal subunit; GO:0019843,rRNA binding; GO:0003735,structural constituent of ribosome; GO:0006412,translation	PF16205.5:Ribosomal_S17 N-terminal
gene-LOC110736163	0.43	0.1	0	3.35	4.22	3.39	26	6	0	201	239	169	4.4015	0.000453066	0.0328022	up	NW_018743292.1	756560	762294	-	LOC110736163	--	K00454 lipoxygenase [EC:1.13.11.12] | (RefSeq) linoleate 13S-lipoxygenase 2-1, chloroplastic-like (A)	ko00591: Linoleic acid metabolism; ko00592: alpha-Linolenic acid metabolism	linoleate 13S-lipoxygenase 2-1, chloroplastic-like [Chenopodium quinoa]	RecName: Full=Linoleate 13S-lipoxygenase 2-1, chloroplastic; EC=1.13.11.12; AltName: Full=Lipoxygenase 2-1; Flags: Precursor;	RecName: Full=Lipoxygenase {ECO:0000256|RuleBase:RU003975}; EC=1.13.11.- {ECO:0000256|RuleBase:RU003975};	--	GO:0009570,chloroplast stroma; GO:0009534,chloroplast thylakoid; GO:0016165,linoleate 13S-lipoxygenase activity; GO:0046872,metal ion binding; GO:0010597,green leaf volatile biosynthetic process; GO:0031408,oxylipin biosynthetic process	PF00305.19:Lipoxygenase
gene-LOC110724990	49.73	41.37	36.48	20.34	19.36	20.65	770	610	463	311	279	262	-1.06065	0.000454879	0.0328599	down	NW_018742798.1	4373069	4378801	-	LOC110724990	--	K11087 small nuclear ribonucleoprotein D1 | (RefSeq) small nuclear ribonucleoprotein SmD1a (A)	ko03040: Spliceosome	small nuclear ribonucleoprotein SmD1a [Chenopodium quinoa]	RecName: Full=Small nuclear ribonucleoprotein SmD1a {ECO:0000303|PubMed:15575968}; Short=AtSmD1-a {ECO:0000303|PubMed:15575968};	SubName: Full=Uncharacterized protein {ECO:0000313|EMBL:KNA25193.1};	Small nuclear ribonucleoprotein SMD1 and related snRNPs	GO:0071013,catalytic step 2 spliceosome; GO:0000243,commitment complex; GO:0005829,cytosol; GO:0016607,nuclear speck; GO:0005730,nucleolus; GO:0005634,nucleus; GO:0034715,pICln-Sm protein complex; GO:0071011,precatalytic spliceosome; GO:0071010,prespliceosome; GO:0034719,SMN-Sm protein complex; GO:0097526,spliceosomal tri-snRNP complex; GO:0005685,U1 snRNP; GO:0005689,U12-type spliceosomal comple…	PF01423.22:LSM domain
gene-LOC110738117	10.03	12.1	11.4	2.32	4.25	3.43	175	201	163	40	69	49	-1.74999	0.000457336	0.0329638	down	NW_018743373.1	960017	960987	-	LOC110738117	--	--	--	--	--	--	--	--	--
gene-LOC110682507	36.34	39.15	57.83	67.17	277.3	206.85	1123	1152	1465	2050	7978	5238	2.01863	0.000458941	0.033006	up	NW_018743574.1	8194793	8196673	-	LOC110682507	--	K00430 peroxidase [EC:1.11.1.7] | (RefSeq) peroxidase 27-like (A)	ko00940: Phenylpropanoid biosynthesis	peroxidase 27-like [Chenopodium quinoa]	RecName: Full=Peroxidase 27; Short=Atperox P27; EC=1.11.1.7; AltName: Full=ATP12a; AltName: Full=PRXR7; Flags: Precursor;	RecName: Full=Peroxidase {ECO:0000256|RuleBase:RU362060, ECO:0000256|SAAS:SAAS00709852}; EC=1.11.1.7 {ECO:0000256|RuleBase:RU362060, ECO:0000256|SAAS:SAAS00709852};	--	GO:0005576,extracellular region; GO:0009505,plant-type cell wall; GO:0009506,plasmodesma; GO:0020037,heme binding; GO:0046872,metal ion binding; GO:0004601,peroxidase activity; GO:0042744,hydrogen peroxide catabolic process; GO:0009664,plant-type cell wall organization; GO:0006979,response to oxidative stress	PF00141.23:Peroxidase
novel.6415	0	0	0	0.163864	0.989275	0.527516	0	0	0	12	74	36	7.79167	0.000466584	0.0334813	up	NW_018744662.1	3980867	3981646	.	--	--	--	--	--	--	--	--	--	--
novel.7619	0	0	0	0.795205	0.231711	1.29054	0	0	0	40	13	61	7.79935	0.00046782	0.0334957	up	NW_018745174.1	1815953	1816493	.	--	--	--	--	uncharacterized protein LOC110737911 [Chenopodium quinoa]	--	SubName: Full=Uncharacterized protein {ECO:0000313|EMBL:KNA17867.1}; Flags: Fragment;	--	--	PF14111.6:Domain of unknown function (DUF4283)
gene-LOC110724643	31.73	32.67	39.5	8.16	8.74	16.66	1276	1251	1302	324	327	549	-1.61262	0.000475913	0.0339651	down	NW_018742770.1	1995683	2001122	-	LOC110724643	--	K23277 anthranilate N-benzoyltransferase [EC:2.3.1.144] | (RefSeq) anthranilate N-benzoyltransferase protein 2-like (A)	--	protein ECERIFERUM 26-like [Chenopodium quinoa]	RecName: Full=Protein ECERIFERUM 2;	RecName: Full=NADPH--cytochrome P450 reductase {ECO:0000256|HAMAP-Rule:MF_03212}; Short=CPR {ECO:0000256|HAMAP-Rule:MF_03212}; Short=p450R {ECO:0000256|HAMAP-Rule:MF_03212}; EC=1.6.2.4 {ECO:0000256|HAMAP-Rule:MF_03212};	--	GO:0005783,endoplasmic reticulum; GO:0005634,nucleus; GO:0016747,transferase activity, transferring acyl groups other than amino-acyl groups; GO:0071555,cell wall organization; GO:0009555,pollen development; GO:0042761,very long-chain fatty acid biosynthetic process; GO:0010025,wax biosynthetic process	PF02458.15:Transferase family
novel.7892	0	0	0	0.738797	0.622893	0.898948	0	0	0	33	28	37	7.52461	0.000477989	0.0339981	up	NW_018745311.1	535484	536537	-	--	--	--	--	--	--	--	--	--	--
gene-LOC110699526	13.63	13.89	15.2	1.44	4.62	4.61	574	557	525	60	181	159	-2.01015	0.000485279	0.0343656	down	NW_018744589.1	607590	609635	+	LOC110699526	--	K15397 3-ketoacyl-CoA synthase [EC:2.3.1.199] | (RefSeq) 3-ketoacyl-CoA synthase 19-like (A)	ko00062: Fatty acid elongation; ko04626: Plant-pathogen interaction	3-ketoacyl-CoA synthase 19-like [Chenopodium quinoa]	RecName: Full=3-ketoacyl-CoA synthase 19 {ECO:0000303|PubMed:18465198}; Short=KCS-19 {ECO:0000303|PubMed:18465198}; EC=2.3.1.199 {ECO:0000305}; AltName: Full=Very long-chain fatty acid condensing enzyme 19 {ECO:0000303|PubMed:18465198}; Short=VLCFA condensing enzyme 19 {ECO:0000303|PubMed:18465198};	RecName: Full=3-ketoacyl-CoA synthase {ECO:0000256|PIRNR:PIRNR036417}; EC=2.3.1.- {ECO:0000256|PIRNR:PIRNR036417};	--	GO:0016021,integral component of membrane; GO:0102336,3-oxo-arachidoyl-CoA synthase activity; GO:0102337,3-oxo-cerotoyl-CoA synthase activity; GO:0102338,3-oxo-lignoceronyl-CoA synthase activity; GO:0102756,very-long-chain 3-ketoacyl-CoA synthase activity; GO:0006633,fatty acid biosynthetic process; GO:0009409,response to cold; GO:0009416,response to light stimulus	PF08392.12:FAE1/Type III polyketide synthase-like protein
gene-LOC110714433	23.61	22.91	30.1	43.17	84.42	58.82	1082	1000	1131	1954	3602	2209	1.26696	0.000490953	0.0346915	up	NW_018745454.1	5257022	5259791	-	LOC110714433	--	K19996 phosphatidylinositol transfer protein SFH5 | (RefSeq) patellin-3-like (A)	--	patellin-3-like [Chenopodium quinoa]	RecName: Full=Patellin-3;	SubName: Full=Uncharacterized protein {ECO:0000313|EMBL:KNA21441.1};	Phosphatidylinositol transfer protein SEC14 and related proteins	GO:0005737,cytoplasm; GO:0005886,plasma membrane; GO:0008289,lipid binding; GO:0007049,cell cycle; GO:0051301,cell division	PF00650.20:CRAL/TRIO domain
novel.3257	0	0	0	0	1.51357	2.43923	0	0	0	0	190	275	9.8212	0.000492059	0.0346939	up	NW_018743292.1	1485667	1486975	+	--	--	--	--	--	--	--	--	--	--
gene-LOC110730387	2.96	2.58	2.15	5.22	10.73	16.68	111	92	66	193	374	512	2.10363	0.000495773	0.0348798	up	NW_018743032.1	2178484	2180509	-	LOC110730387	--	--	--	uncharacterized protein At5g19025-like [Chenopodium quinoa]	RecName: Full=Uncharacterized protein At5g19025;	SubName: Full=Uncharacterized protein {ECO:0000313|EMBL:KNA04967.1};	--	GO:0022625,cytosolic large ribosomal subunit; GO:0016021,integral component of membrane; GO:0003723,RNA binding; GO:0003735,structural constituent of ribosome; GO:0042254,ribosome biogenesis; GO:0006412,translation	--
gene-LOC110704453	20.89	24.22	16.3	9.02	10.17	6.36	633	699	405	270	287	158	-1.25472	0.00049995	0.0350973	down	NW_018744835.1	1087021	1095684	-	LOC110704453	--	K15437 aminoacyl tRNA synthase complex-interacting multifunctional protein 1 | (RefSeq) tRNA-aminoacylation cofactor arc1-like (A)	--	tRNA-aminoacylation cofactor arc1-like [Chenopodium quinoa]	RecName: Full=Methionine--tRNA ligase, cytoplasmic {ECO:0000305}; EC=6.1.1.10 {ECO:0000305}; AltName: Full=Methionyl-tRNA synthetase {ECO:0000305}; Short=MetRS {ECO:0000305};	SubName: Full=Uncharacterized protein {ECO:0000313|EMBL:KNA09981.1};	tRNA-binding protein	GO:0005829,cytosol; GO:0005524,ATP binding; GO:0004825,methionine-tRNA ligase activity; GO:0000049,tRNA binding; GO:0006431,methionyl-tRNA aminoacylation; GO:0046686,response to cadmium ion; GO:0006418,tRNA aminoacylation for protein translation	PF01588.20:Putative tRNA binding domain
novel.7236	6.97404	7.53145	7.52949	0.413403	0	0	464	474	509	28	0	0	-5.74098	0.000506123	0.0353672	down	NW_018745003.1	2450176	2450903	.	--	--	--	--	--	--	--	--	--	--
gene-LOC110695965	22.3	27.03	19.69	7.54	6.1	10.2	467	539	338	156	119	175	-1.50397	0.000506813	0.0353672	down	NW_018742359.1	1422950	1452127	-	LOC110695965	--	--	--	uncharacterized protein LOC110695965 [Chenopodium quinoa]	--	SubName: Full=Uncharacterized protein {ECO:0000313|EMBL:KNA21855.1};	--	--	PF04108.12:Autophagy protein Apg17
gene-LOC110689791	32.38	32.36	57.26	63.93	221.75	347.32	498	474	722	971	3175	4377	2.36793	0.000509343	0.0354492	up	NW_018743977.1	2868429	2870164	+	LOC110689791	--	--	--	proline-rich protein 1-like [Chenopodium quinoa]	--	SubName: Full=Uncharacterized protein {ECO:0000313|EMBL:KNA16054.1};	--	--	PF01190.17:Pollen proteins Ole e I like
gene-LOC110734251	2.37	2.81	1.86	5.1	7.35	6.3	109	123	70	231	314	237	1.42035	0.000512291	0.0355778	up	NW_018743212.1	772262	775918	-	LOC110734251	--	--	--	uncharacterized protein LOC110734251 isoform X1 [Chenopodium quinoa]	--	SubName: Full=Uncharacterized protein {ECO:0000313|EMBL:KNA20343.1};	--	GO:0016021,integral component of membrane	--
novel.2031	0	0	0	0	2.46597	6.7465	0	0	0	0	134	329	9.85603	0.000513537	0.035588	up	NW_018742861.1	1548256	1548822	.	--	--	--	--	--	--	--	--	--	--
gene-LOC110718746	39.91	38.68	43.91	61.67	105.36	103.02	1609	1485	1451	2455	3954	3403	1.13976	0.000516156	0.0356931	up	NW_018742461.1	3056369	3063421	+	LOC110718746	--	--	--	O-acyltransferase WSD1-like [Chenopodium quinoa]	RecName: Full=O-acyltransferase WSD1; AltName: Full=Diacylglycerol O-acyltransferase; Short=DGAT; EC=2.3.1.20; AltName: Full=Long-chain-alcohol O-fatty-acyltransferase; EC=2.3.1.75; AltName: Full=Wax synthase; Short=WS;	SubName: Full=Uncharacterized protein {ECO:0000313|EMBL:CCB56847.1};	--	GO:0005783,endoplasmic reticulum; GO:0005789,endoplasmic reticulum membrane; GO:0016021,integral component of membrane; GO:0005886,plasma membrane; GO:0102966,arachidoyl-CoA:1-dodecanol O-acyltransferase activity; GO:0004144,diacylglycerol O-acyltransferase activity; GO:0047196,long-chain-alcohol O-fatty-acyltransferase activity; GO:0103095,wax ester synthase activity; GO:0019432,triglyceride bio…	PF06974.13:Protein of unknown function (DUF1298)
gene-LOC110724876	36.72	40.3	18.3	11.93	12.55	9.31	1131	1182	462	363	360	235	-1.47227	0.000518378	0.0356942	down	NW_018742770.1	4518829	4520786	-	LOC110724876	--	--	--	surfeit locus protein 6 homolog [Chenopodium quinoa]	--	SubName: Full=Uncharacterized protein {ECO:0000313|EMBL:KNA07656.1};	Uncharacterized conserved protein	--	PF15459.6:60S ribosome biogenesis protein Rrp14
novel.6474	2.85726	2.65144	0.955094	0.187893	0.128176	0	595	523	202	40	28	0	-4.28101	0.000522639	0.0359112	down	NW_018744693.1	6083883	6086164	.	--	--	--	--	uncharacterized protein LOC110710849 [Chenopodium quinoa]	--	--	--	--	--
gene-LOC110714499	24.23	26.57	3.55	2.72	0.41	0.17	1208	1261	145	134	19	7	-3.95884	0.000525587	0.035961	down	NW_018745454.1	3869054	3871474	-	LOC110714499	--	K22683 aspartyl protease family protein [EC:3.4.23.-] | (RefSeq) aspartyl protease family protein 2-like (A)	--	aspartyl protease family protein 2-like [Chenopodium quinoa]	RecName: Full=Aspartyl protease family protein 2 {ECO:0000305}; EC=3.4.23.- {ECO:0000305}; Flags: Precursor;	SubName: Full=Uncharacterized protein {ECO:0000313|EMBL:KNA18157.1};	Aspartyl protease	GO:0016020,membrane; GO:0009505,plant-type cell wall; GO:0004190,aspartic-type endopeptidase activity; GO:0030163,protein catabolic process; GO:0006508,proteolysis; GO:0080167,response to karrikin	PF14543.6:Xylanase inhibitor N-terminal
novel.4626	2.75689	4.32298	0	0	0	0	207	307	0	0	0	0	-9.71694	0.000528709	0.0360983	down	NW_018743920.1	8460748	8461818	+	--	--	--	--	--	--	--	--	--	--
gene-LOC110719063	10.78	12.39	20.66	3.45	6.07	2.29	551	603	866	174	289	96	-1.92726	0.000531155	0.0361861	down	NW_018742476.1	23589	29055	+	LOC110719063	--	--	--	O-acyltransferase WSD1-like [Chenopodium quinoa]	RecName: Full=O-acyltransferase WSD1; AltName: Full=Diacylglycerol O-acyltransferase; Short=DGAT; EC=2.3.1.20; AltName: Full=Long-chain-alcohol O-fatty-acyltransferase; EC=2.3.1.75; AltName: Full=Wax synthase; Short=WS;	SubName: Full=Uncharacterized protein {ECO:0000313|EMBL:KNA25924.1};	--	GO:0005783,endoplasmic reticulum; GO:0005789,endoplasmic reticulum membrane; GO:0016021,integral component of membrane; GO:0005886,plasma membrane; GO:0102966,arachidoyl-CoA:1-dodecanol O-acyltransferase activity; GO:0004144,diacylglycerol O-acyltransferase activity; GO:0047196,long-chain-alcohol O-fatty-acyltransferase activity; GO:0103095,wax ester synthase activity; GO:0019432,triglyceride bio…	PF06974.13:Protein of unknown function (DUF1298)
gene-LOC110729100	3.71	3.67	1.38	0.68	0.29	0.57	341	321	104	62	25	43	-2.44534	0.00053223	0.0361861	down	NW_018742969.1	494767	503690	+	LOC110729100	--	K05643 ATP-binding cassette, subfamily A (ABC1), member 3 | (RefSeq) ABC transporter A family member 1-like isoform X1 (A)	ko02010: ABC transporters	ABC transporter G family member 32-like isoform X1 [Chenopodium quinoa]	RecName: Full=ABC transporter G family member 32 {ECO:0000303|PubMed:18299247}; Short=ABC transporter ABCG.32; Short=AtABCG32 {ECO:0000303|PubMed:18299247}; AltName: Full=Pleiotropic drug resistance protein 4 {ECO:0000303|PubMed:12430018, ECO:0000303|PubMed:16506311}; AltName: Full=Protein PERMEABLE CUTICLE 1 {ECO:0000303|PubMed:21628525};	SubName: Full=Uncharacterized protein {ECO:0000313|EMBL:KNA14919.1};	Pleiotropic drug resistance proteins (PDR1-15), ABC superfamily	GO:0016021,integral component of membrane; GO:0005886,plasma membrane; GO:0005524,ATP binding; GO:0042626,ATPase activity, coupled to transmembrane movement of substances; GO:0042335,cuticle development; GO:0006855,drug transmembrane transport	PF01061.24:ABC-2 type transporter
gene-LOC110710142	18.18	18.27	5.57	3.03	1.92	3.09	438	419	110	72	43	61	-2.3349	0.000534606	0.0362714	down	NW_018745170.1	1203420	1211736	-	LOC110710142	--	--	--	uncharacterized protein LOC110710142 [Chenopodium quinoa]	--	SubName: Full=Uncharacterized protein {ECO:0000313|EMBL:KDP33434.1};	--	--	PF10262.9:Rdx family
gene-LOC110701689	45.21	46.56	14.73	102.37	137.08	105.57	1292	1267	345	2889	3647	2472	1.72178	0.000536822	0.0363455	up	NW_018744647.1	2255038	2258299	+	LOC110701689	--	K09872 aquaporin PIP | (RefSeq) probable aquaporin PIP2-5 (A)	--	probable aquaporin PIP2-5 [Chenopodium quinoa]	RecName: Full=Probable aquaporin PIP2-5; AltName: Full=Plasma membrane intrinsic protein 2-5; Short=AtPIP2;5; AltName: Full=Plasma membrane intrinsic protein 2d; Short=PIP2d;	SubName: Full=Uncharacterized protein {ECO:0000313|EMBL:KNA13853.1};	Aquaporin (major intrinsic protein family)	GO:0005887,integral component of plasma membrane; GO:0015250,water channel activity; GO:0034220,ion transmembrane transport; GO:0006833,water transport	PF00230.20:Major intrinsic protein
gene-LOC110687837	3.7	2.06	0.21	14.71	46.81	8.27	149	79	7	585	1755	273	3.53722	0.00053922	0.0363633	up	NW_018743920.1	1581528	1585246	-	LOC110687837	--	K14638 solute carrier family 15 (peptide/histidine transporter), member 3/4 | (RefSeq) protein NRT1/ PTR FAMILY 5.9-like (A)	--	protein NRT1/ PTR FAMILY 5.9-like [Chenopodium quinoa]	RecName: Full=Protein NRT1/ PTR FAMILY 5.8; Short=AtNPF5.8;	SubName: Full=Uncharacterized protein {ECO:0000313|EMBL:KNA16965.1};	H+/oligopeptide symporter	GO:0016021,integral component of membrane; GO:0022857,transmembrane transporter activity; GO:0009624,response to nematode	PF00854.21:POT family
novel.2278	0	0	0	0.093351	2.98963	0.890132	0	0	0	4	132	36	8.24857	0.000539331	0.0363633	up	NW_018742951.1	1374042	1375535	-	--	--	K20093 DNA excision repair protein ERCC-6-like [EC:3.6.4.12] | (RefSeq) protein CHROMATIN REMODELING 24-like (A)	--	protein CHROMATIN REMODELING 24-like [Chenopodium quinoa]	--	--	--	--	--
gene-LOC110692956	5.11	8.24	3.19	16.92	18.97	66.38	86	132	44	281	297	915	2.68194	0.000541283	0.036419	up	NW_018744137.1	535367	536279	-	LOC110692956	--	--	--	--	--	--	--	--	--
gene-LOC110723813	18.72	16.87	22.34	32.47	54.59	52.53	549	471	537	940	1490	1262	1.26467	0.00054745	0.0367575	up	NW_018742733.1	2325301	2330202	+	LOC110723813	--	--	--	tobamovirus multiplication protein 1-like [Chenopodium quinoa]	RecName: Full=Tobamovirus multiplication protein 1; Short=AtTOM1;	SubName: Full=Uncharacterized protein {ECO:0000313|EMBL:KNA14168.1};	--	GO:0016021,integral component of membrane; GO:0009705,plant-type vacuole membrane; GO:0005774,vacuolar membrane; GO:0046786,viral replication complex formation and maintenance	PF06454.11:Protein of unknown function (DUF1084)
gene-LOC110685939	18.95	17.95	15.33	5.85	5.37	1.77	561	506	372	171	148	43	-2.00246	0.000561108	0.0375966	down	NW_018743850.1	2716526	2722954	-	LOC110685939	--	--	--	uncharacterized protein LOC110685939 [Chenopodium quinoa]	--	SubName: Full=Uncharacterized protein {ECO:0000313|EMBL:KNA12685.1};	--	--	--
gene-LOC110725244	13.48	16.38	27.67	35.51	86.62	87.99	571	661	961	1486	3417	3055	1.84936	0.000580327	0.038804	up	NW_018742810.1	1356943	1359481	+	LOC110725244	--	K20667 beta-amyrin 28-monooxygenase [EC:1.14.14.126] | (RefSeq) beta-amyrin 28-oxidase-like (A)	--	beta-amyrin 28-oxidase-like [Chenopodium quinoa]	RecName: Full=Beta-amyrin 28-oxidase; EC=1.14.13.-; AltName: Full=Cytochrome P450 CYP716A52v2;	SubName: Full=Uncharacterized protein {ECO:0000313|EMBL:KNA13824.1};	Cytochrome P450 CYP4/CYP19/CYP26 subfamilies	GO:0016021,integral component of membrane; GO:0020037,heme binding; GO:0005506,iron ion binding; GO:0004497,monooxygenase activity; GO:0016705,oxidoreductase activity, acting on paired donors, with incorporation or reduction of molecular oxygen	PF00067.22:Cytochrome P450
novel.6515	0	0	0	0.665489	0.41534	2.11614	0	0	0	24	16	71	7.78658	0.000583738	0.0389516	up	NW_018744704.1	729103	729490	-	--	--	--	--	uncharacterized protein LOC110729982 [Chenopodium quinoa]	--	--	--	--	--
gene-LOC110728420	31.65	27.65	27.19	42.38	74.82	69.63	1291	1074	909	1707	2841	2327	1.11425	0.000586568	0.0390274	up	NW_018742933.1	122935	130727	+	LOC110728420	--	K13811 3'-phosphoadenosine 5'-phosphosulfate synthase [EC:2.7.7.4 2.7.1.25] | (RefSeq) ATP sulfurylase 1, chloroplastic-like (A)	ko00230: Purine metabolism; ko00261: Monobactam biosynthesis; ko00450: Selenocompound metabolism; ko00920: Sulfur metabolism	ATP sulfurylase 1, chloroplastic-like [Chenopodium quinoa]	RecName: Full=ATP sulfurylase 1, chloroplastic; Short=AtPS1; EC=2.7.7.4; Flags: Precursor;	SubName: Full=Uncharacterized protein {ECO:0000313|EMBL:KNA08144.1};	ATP sulfurylase (sulfate adenylyltransferase)	GO:0009507,chloroplast; GO:0009570,chloroplast stroma; GO:0005886,plasma membrane; GO:0004020,adenylylsulfate kinase activity; GO:0005524,ATP binding; GO:0004781,sulfate adenylyltransferase (ATP) activity; GO:0070814,hydrogen sulfide biosynthetic process; GO:0046686,response to cadmium ion; GO:0009735,response to cytokinin; GO:0001887,selenium compound metabolic process; GO:0000103,sulfate assimi…	PF01747.17:ATP-sulfurylase
gene-LOC110688517	11.1	13.06	8.1	22.67	32.61	18.46	739	828	442	1490	2021	1007	1.19603	0.000587286	0.0390274	up	NW_018742309.1	5154298	5164229	-	LOC110688517	--	K13430 serine/threonine-protein kinase PBS1 [EC:2.7.11.1] | (RefSeq) serine/threonine-protein kinase PBS1-like (A)	ko04626: Plant-pathogen interaction	probable leucine-rich repeat receptor-like protein kinase At5g49770 [Chenopodium quinoa]	RecName: Full=Probable leucine-rich repeat receptor-like protein kinase At5g49770; EC=2.7.11.1; Flags: Precursor;	SubName: Full=Uncharacterized protein {ECO:0000313|EMBL:KNA09933.1};	--	GO:0016021,integral component of membrane; GO:0005524,ATP binding; GO:0004674,protein serine/threonine kinase activity	PF00069.25:Protein kinase domain
gene-LOC110697661	0.25	0.68	0.04	2.5	3.42	4.72	14	37	2	141	182	221	3.50237	0.000589027	0.0390629	up	NW_018744491.1	71153	81454	-	LOC110697661	--	--	--	--	--	--	--	--	--
novel.963	2.97207	3.91833	0	0	0	0	220	274	0	0	0	0	-9.65656	0.000596389	0.0394322	down	NW_018742418.1	7899852	7900660	.	--	--	--	--	factor Xa inhibitor BuXI-like [Chenopodium quinoa]	--	--	--	--	PF00197.18:Trypsin and protease inhibitor
gene-LOC110705586	7.29	7.08	10.82	21.18	50.28	20.83	161	149	196	462	1034	377	1.83776	0.000597133	0.0394322	up	NW_018744878.1	3687250	3689067	-	LOC110705586	--	K09873 aquaporin TIP | (RefSeq) aquaporin TIP4-1-like (A)	--	aquaporin TIP4-1-like [Chenopodium quinoa]	RecName: Full=Aquaporin TIP4-1; AltName: Full=Epsilon-tonoplast intrinsic protein; Short=Epsilon-TIP; AltName: Full=Tonoplast intrinsic protein 4-1; Short=AtTIP4;1;	SubName: Full=Uncharacterized protein {ECO:0000313|EMBL:KNA17477.1};	Aquaporin (major intrinsic protein family)	GO:0042807,central vacuole; GO:0005887,integral component of plasma membrane; GO:0009705,plant-type vacuole membrane; GO:0015250,water channel activity; GO:0034220,ion transmembrane transport	PF00230.20:Major intrinsic protein
gene-LOC110698531	16.82	18.16	2.44	57.75	53.82	123.43	362	372	43	1227	1078	2176	2.71468	0.000598252	0.0394322	up	NW_018744537.1	1175710	1178974	-	LOC110698531	--	--	--	cold-regulated 413 plasma membrane protein 2-like [Chenopodium quinoa]	RecName: Full=Cold-regulated 413 plasma membrane protein 2; Short=AtCOR413-PM2;	SubName: Full=Uncharacterized protein {ECO:0000313|EMBL:KNA25855.1};	--	GO:0016021,integral component of membrane; GO:0005886,plasma membrane; GO:0005774,vacuolar membrane	PF05562.11:Cold acclimation protein WCOR413
gene-LOC110685584	39.18	26.53	14.88	64.23	75.13	193.42	2033	1311	633	3291	3629	8223	2.09582	0.000601626	0.039574	up	NW_018742204.1	20904532	20908820	-	LOC110685584	--	--	--	vicilin-like seed storage protein At2g18540 [Chenopodium quinoa]	RecName: Full=Vicilin-like seed storage protein At2g18540; AltName: Full=Globulin At2g18540; Flags: Precursor;	SubName: Full=Uncharacterized protein {ECO:0000313|EMBL:KNA20974.1};	--	GO:0045735,nutrient reservoir activity	PF00190.22:Cupin
gene-LOC110707978	2	1.95	2.25	4.18	10.76	5.56	156	145	144	322	781	355	1.69996	0.000607963	0.0398525	up	NW_018745003.1	4007382	4017971	-	LOC110707978	--	K00737 beta-1,4-mannosyl-glycoprotein beta-1,4-N-acetylglucosaminyltransferase [EC:2.4.1.144] | (RefSeq) beta-1,4-mannosyl-glycoprotein 4-beta-N-acetylglucosaminyltransferase-like isoform X1 (A)	ko00510: N-Glycan biosynthesis	uncharacterized protein LOC110707978 isoform X2 [Chenopodium quinoa]	RecName: Full=Auxin-induced protein 22D; AltName: Full=Indole-3-acetic acid-induced protein ARG13;	RecName: Full=Auxin-induced protein {ECO:0000256|RuleBase:RU004549};	--	GO:0005634,nucleus; GO:0009734,auxin-activated signaling pathway; GO:0006355,regulation of transcription, DNA-templated; GO:0006351,transcription, DNA-templated	PF04724.13:Glycosyltransferase family 17
gene-LOC110710448	20.39	20.44	9.09	5.96	4.54	2.8	728	695	266	210	151	82	-1.87783	0.000608322	0.0398525	down	NW_018742418.1	4736272	4742538	-	LOC110710448	--	K00059 3-oxoacyl-[acyl-carrier protein] reductase [EC:1.1.1.100] | (RefSeq) 3-oxoacyl-[acyl-carrier-protein] reductase 4-like (A)	ko00061: Fatty acid biosynthesis; ko00780: Biotin metabolism; ko01212: Fatty acid metabolism	3-oxoacyl-[acyl-carrier-protein]	RecName: Full=3-oxoacyl-[acyl-carrier-protein] reductase, chloroplastic; EC=1.1.1.100; AltName: Full=3-ketoacyl-acyl carrier protein reductase; Flags: Precursor;	SubName: Full=Uncharacterized protein {ECO:0000313|EMBL:KNA16148.1};	Mitochondrial/plastidial beta-ketoacyl-ACP reductase	GO:0009507,chloroplast; GO:0102131,3-oxo-glutaryl-[acp] methyl ester reductase activity; GO:0102132,3-oxo-pimeloyl-[acp] methyl ester reductase activity; GO:0004316,3-oxoacyl-[acyl-carrier-protein] reductase (NADPH) activity; GO:0051287,NAD binding; GO:0006633,fatty acid biosynthetic process	PF13561.6:Enoyl-(Acyl carrier protein) reductase
gene-LOC110695863	5.35	6	4.75	10.1	13.85	16.15	176	188	128	328	424	435	1.33004	0.0006157	0.0402543	up	NW_018742359.1	232786	249146	+	LOC110695863	--	--	--	lipase-like isoform X1 [Chenopodium quinoa]	RecName: Full=Phospholipase A1 EG1, chloroplastic/mitochondrial {ECO:0000305}; EC=3.1.1.32 {ECO:0000305|PubMed:27367609}; AltName: Full=Protein EXTRA GLUME 1 {ECO:0000303|PubMed:18980657}; Flags: Precursor;	SubName: Full=Uncharacterized protein {ECO:0000313|EMBL:KMS96148.1};	Predicted lipase	GO:0009507,chloroplast; GO:0005739,mitochondrion; GO:0052740,1-acyl-2-lysophosphatidylserine acylhydrolase activity; GO:0008970,phospholipase A1 activity; GO:0052739,phosphatidylserine 1-acylhydrolase activity; GO:0004620,phospholipase activity; GO:0010582,floral meristem determinacy; GO:0048449,floral organ formation; GO:0016042,lipid catabolic process	PF01764.25:Lipase (class 3)
gene-LOC110715921	0.13	0.07	0	1.06	1.26	3.38	4	2	0	32	36	85	4.87242	0.000621537	0.040554	up	NW_018745533.1	803288	806866	+	LOC110715921	--	K05894 12-oxophytodienoic acid reductase [EC:1.3.1.42] | (RefSeq) 12-oxophytodienoate reductase 3-like (A)	ko00592: alpha-Linolenic acid metabolism	12-oxophytodienoate reductase 3-like [Chenopodium quinoa]	RecName: Full=12-oxophytodienoate reductase 3; EC=1.3.1.42; AltName: Full=12-oxophytodienoate-10,11-reductase 3; Short=OPDA-reductase 3; AltName: Full=LeOPR3;	SubName: Full=Uncharacterized protein {ECO:0000313|EMBL:KMS96193.1};	NADH:flavin oxidoreductase/12-oxophytodienoate reductase	GO:0005622,intracellular; GO:0005777,peroxisome; GO:0016629,12-oxophytodienoate reductase activity; GO:0010181,FMN binding; GO:0042802,identical protein binding; GO:0009695,jasmonic acid biosynthetic process; GO:0055114,oxidation-reduction process; GO:0031408,oxylipin biosynthetic process	PF00724.20:NADH:flavin oxidoreductase / NADH oxidase family
gene-LOC110694096	6.96	6.81	3.75	12.31	23.94	14.37	308	287	136	538	986	521	1.53306	0.000622833	0.0405569	up	NW_018744239.1	1317582	1325185	-	LOC110694096	--	K15639 PHYB activation tagged suppressor 1 [EC:1.14.-.-] | (RefSeq) cytochrome P450 734A1-like (A)	ko00905: Brassinosteroid biosynthesis	cytochrome P450 CYP72A219-like [Chenopodium quinoa]	RecName: Full=Cytochrome P450 CYP72A219; EC=1.14.-.-; AltName: Full=Cytochrome P450 CYP72A129;	SubName: Full=Uncharacterized protein {ECO:0000313|EMBL:KNA06618.1};	Cytochrome P450 CYP4/CYP19/CYP26 subfamilies	GO:0016021,integral component of membrane; GO:0020037,heme binding; GO:0005506,iron ion binding; GO:0004497,monooxygenase activity; GO:0016705,oxidoreductase activity, acting on paired donors, with incorporation or reduction of molecular oxygen	PF00067.22:Cytochrome P450
novel.7306	3.48225	4.91492	0	0	0	0	208	278	0	0	0	0	-9.63428	0.000631229	0.041021	down	NW_018745024.1	3114042	3117587	+	--	--	--	--	PREDICTED: defensin-like protein 1 isoform X2 [Beta vulgaris subsp. vulgaris]	RecName: Full=Defensin-like protein 6; AltName: Full=Low-molecular-weight cysteine-rich protein 74; Short=Protein LCR74; AltName: Full=Plant defensin 2.5; Flags: Precursor;	SubName: Full=Uncharacterized protein {ECO:0000313|EMBL:KNA10879.1};	--	GO:0005576,extracellular region; GO:0006952,defense response; GO:0050832,defense response to fungus; GO:0031640,killing of cells of other organism	PF00304.20:Gamma-thionin family
gene-LOC110733314	2.39	3.07	1.86	4.53	11.39	15.48	108	132	69	202	479	573	2.11669	0.000634148	0.041112	up	NW_018743199.1	466668	468861	-	LOC110733314	--	K22683 aspartyl protease family protein [EC:3.4.23.-] | (RefSeq) aspartyl protease family protein 2-like (A)	--	aspartic proteinase PCS1-like [Chenopodium quinoa]	RecName: Full=Aspartic proteinase PCS1; EC=3.4.23.-; AltName: Full=Aspartic protease 38; Short=AtASP38; AltName: Full=Protein EMBRYO DEFECTIVE 24; AltName: Full=Protein PROMOTION OF CELL SURVIVAL 1; Flags: Precursor;	SubName: Full=Uncharacterized protein {ECO:0000313|EMBL:KNA19908.1};	Aspartyl protease	GO:0005783,endoplasmic reticulum; GO:0004190,aspartic-type endopeptidase activity; GO:0008233,peptidase activity; GO:0012501,programmed cell death; GO:0030163,protein catabolic process	PF14543.6:Xylanase inhibitor N-terminal
gene-LOC110688826	139.53	137.91	54.11	43.92	28.85	27.17	3278	3085	1042	1019	631	523	-1.68886	0.000635326	0.041112	down	NW_018743942.1	1205430	1208348	-	LOC110688826	--	K02985 small subunit ribosomal protein S3e | (RefSeq) 40S ribosomal protein S3-3-like (A)	ko03010: Ribosome	40S ribosomal protein S3-3-like [Chenopodium quinoa]	RecName: Full=40S ribosomal protein S3-3;	SubName: Full=Uncharacterized protein {ECO:0000313|EMBL:KNA17375.1};	40S ribosomal protein S3	GO:0005829,cytosol; GO:0022626,cytosolic ribosome; GO:0022627,cytosolic small ribosomal subunit; GO:0016020,membrane; GO:0005730,nucleolus; GO:0005634,nucleus; GO:0009506,plasmodesma; GO:0003684,damaged DNA binding; GO:0008534,oxidized purine nucleobase lesion DNA N-glycosylase activity; GO:0003723,RNA binding; GO:0003735,structural constituent of ribosome; GO:0002181,cytoplasmic translation; GO:…	PF00189.20:Ribosomal protein S3, C-terminal domain
novel.1600	0.831006	0.354464	0.333898	1.33062	3.08859	8.56418	41	17	17	67	160	396	3.21959	0.000636441	0.041112	up	NW_018742707.1	80945	81482	+	--	--	--	--	--	--	--	--	--	--
gene-LOC110725671	7.63	6.02	5.11	12.21	18.61	29.07	262	197	144	414	595	818	1.69719	0.000638611	0.04117	up	NW_018742815.1	1684505	1688974	+	LOC110725671	--	--	--	uncharacterized protein LOC110725671 [Chenopodium quinoa]	--	SubName: Full=Uncharacterized protein {ECO:0000313|EMBL:KNA13324.1};	--	GO:0016021,integral component of membrane	--
gene-LOC110732628	14.5	15.09	20.15	37.25	33.8	56.83	891	883	1015	2261	1934	2862	1.37746	0.000642962	0.0413682	up	NW_018743175.1	4560799	4563783	+	LOC110732628	--	--	--	--	--	--	--	--	--
gene-LOC110731738	6.38	6.57	2.84	1.47	1.74	0.75	507	497	185	115	129	49	-1.98017	0.000648358	0.0416326	down	NW_018743074.1	2580122	2586428	+	LOC110731738	--	K09338 homeobox-leucine zipper protein | (RefSeq) homeobox-leucine zipper protein ANTHOCYANINLESS 2-like (A)	--	homeobox-leucine zipper protein ANTHOCYANINLESS 2-like [Chenopodium quinoa]	RecName: Full=Homeobox-leucine zipper protein ANTHOCYANINLESS 2; AltName: Full=HD-ZIP protein ANL2; AltName: Full=Homeodomain protein AHDP; AltName: Full=Homeodomain transcription factor ANL2;	SubName: Full=Uncharacterized protein {ECO:0000313|EMBL:KNA08105.1};	--	GO:0005634,nucleus; GO:0003700,DNA-binding transcription factor activity; GO:0008289,lipid binding; GO:0043565,sequence-specific DNA binding; GO:0043481,anthocyanin accumulation in tissues in response to UV light; GO:0042335,cuticle development; GO:0009827,plant-type cell wall modification; GO:0048364,root development; GO:0048765,root hair cell differentiation; GO:0006351,transcription, DNA-templ…	PF01852.19:START domain
novel.456	0.378009	0.041234	0	1.48623	4.19465	3.82657	39	5	0	156	451	370	4.65764	0.000650289	0.0416739	up	NW_018742275.1	604552	605674	.	--	--	--	--	hypothetical protein BVRB_7g160090 [Beta vulgaris subsp. vulgaris]	--	--	--	--	--
novel.629	0	0	0	0.410391	0.331052	0.802966	0	0	0	27	22	48	7.54676	0.000654593	0.0418668	up	NW_018742345.1	781655	782344	.	--	--	K00799 glutathione S-transferase [EC:2.5.1.18] | (RefSeq) uncharacterized protein LOC110786294 (A)	ko00480: Glutathione metabolism	uncharacterized protein LOC110715453 [Chenopodium quinoa]	--	SubName: Full=Uncharacterized protein {ECO:0000313|EMBL:CCA66050.1};	FOG: Reverse transcriptase	GO:0003676,nucleic acid binding	PF13456.6:Reverse transcriptase-like
gene-LOC110718395	2	2.11	2.34	0.89	0.99	0.65	295	296	282	129	135	78	-1.35659	0.000662386	0.0422322	down	NW_018742455.1	2066086	2086366	-	LOC110718395	--	K16251 DNA-directed RNA polymerase V subunit 1 [EC:2.7.7.6] | (RefSeq) DNA-directed RNA polymerase V subunit 1-like (A)	--	DNA-directed RNA polymerase V subunit 1-like [Chenopodium quinoa]	RecName: Full=DNA-directed RNA polymerase V subunit 1; AltName: Full=DNA-directed RNA polymerase D subunit 1b; Short=AtNRPD1b; Short=Nuclear RNA polymerase D 1b; AltName: Full=DNA-directed RNA polymerase E subunit 1; Short=Nuclear RNA polymerase E 1; EC=2.7.7.6; AltName: Full=Protein DEFECTIVE IN MERISTEM SILENCING 5; AltName: Full=Protein DEFECTIVE IN RNA-DIRECTED DNA METHYLATION 3; AltName: Ful…	RecName: Full=DNA-directed RNA polymerase subunit {ECO:0000256|RuleBase:RU004279}; EC=2.7.7.6 {ECO:0000256|RuleBase:RU004279};	RNA polymerase II, large subunit	GO:0005666,RNA polymerase III complex; GO:0000419,RNA polymerase V complex; GO:0016604,nuclear body; GO:0005730,nucleolus; GO:0005634,nucleus; GO:0003677,DNA binding; GO:0003899,DNA-directed 5'-3' RNA polymerase activity; GO:0046872,metal ion binding; GO:0050832,defense response to fungus; GO:0006306,DNA methylation; GO:0035194,posttranscriptional gene silencing by RNA; GO:0030422,production of s…	PF00623.20:RNA polymerase Rpb1, domain 2
gene-LOC110729358	3.45	6.55	2.94	15.25	19.73	10.46	93	168	65	406	495	231	1.81935	0.000662954	0.0422322	up	NW_018742980.1	1045618	1049507	+	LOC110729358	--	K14423 plant 4,4-dimethylsterol C-4alpha-methyl-monooxygenase [EC:1.14.18.10] | (RefSeq) methylsterol monooxygenase 1-1-like (A)	ko00100: Steroid biosynthesis	methylsterol monooxygenase 1-1-like [Chenopodium quinoa]	RecName: Full=Methylsterol monooxygenase 1-1; EC=1.14.18.9 {ECO:0000269|PubMed:14653780}; AltName: Full=Sterol 4-alpha-methyl-oxidase 1-1; Short=AtSMO1-1;	SubName: Full=Uncharacterized protein {ECO:0000313|EMBL:KNA15593.1};	C-4 sterol methyl oxidase	GO:0005789,endoplasmic reticulum membrane; GO:0016021,integral component of membrane; GO:0016020,membrane; GO:0000254,C-4 methylsterol oxidase activity; GO:0005506,iron ion binding; GO:0080064,4,4-dimethyl-9beta,19-cyclopropylsterol oxidation; GO:0016126,sterol biosynthetic process	PF04116.13:Fatty acid hydroxylase superfamily
gene-LOC110687457	10.27	11.42	12.04	19.09	29.24	42.69	707	749	680	1298	1875	2409	1.44342	0.000664221	0.0422322	up	NW_018743919.1	3955507	3959966	+	LOC110687457	--	K08332 vacuolar protein 8 | (RefSeq) U-box domain-containing protein 4-like (A)	--	U-box domain-containing protein 4-like [Chenopodium quinoa]	RecName: Full=U-box domain-containing protein 4; EC=2.3.2.27; AltName: Full=Plant U-box protein 4; AltName: Full=RING-type E3 ubiquitin transferase PUB4 {ECO:0000305};	SubName: Full=Uncharacterized protein {ECO:0000313|EMBL:KNA25440.1};	FOG: Armadillo/beta-catenin-like repeats	GO:0005634,nucleus; GO:0004842,ubiquitin-protein transferase activity	PF00514.23:Armadillo/beta-catenin-like repeat
gene-LOC110728100	217.41	214.48	125.71	88.1	94.84	82.66	3711	3486	1759	1485	1507	1156	-1.0484	0.000672151	0.0426526	down	NW_018742205.1	1486079	1488926	-	LOC110728100	--	K02927 large subunit ribosomal protein L40e | (RefSeq) ubiquitin-60S ribosomal protein L40-like (A)	ko03010: Ribosome; ko04120: Ubiquitin mediated proteolysis	PREDICTED: ubiquitin-60S ribosomal protein L40 [Beta vulgaris subsp. vulgaris]	RecName: Full=Ubiquitin-60S ribosomal protein L40; Contains: RecName: Full=Ubiquitin; Contains: RecName: Full=60S ribosomal protein L40; AltName: Full=CEP52; Flags: Precursor;	SubName: Full=Uncharacterized protein {ECO:0000313|EMBL:KMS96329.1};	Ubiquitin/60s ribosomal protein L40 fusion	GO:0005634,nucleus; GO:0005840,ribosome; GO:0003735,structural constituent of ribosome; GO:0006412,translation	PF00240.23:Ubiquitin family
gene-LOC110698526	9.77	10.75	5.65	2.35	1.4	3.07	509	533	241	121	68	131	-1.89235	0.000680308	0.0430858	down	NW_018744537.1	1149791	1156067	+	LOC110698526	--	K01897 long-chain acyl-CoA synthetase [EC:6.2.1.3] | (RefSeq) long chain acyl-CoA synthetase 2-like (A)	ko00061: Fatty acid biosynthesis; ko00071: Fatty acid degradation; ko01212: Fatty acid metabolism; ko04146: Peroxisome	long chain acyl-CoA synthetase 2-like [Chenopodium quinoa]	RecName: Full=Long chain acyl-CoA synthetase 2; EC=6.2.1.3; AltName: Full=Protein Botrytis resistant 1; AltName: Full=Protein LATERAL ROOT DEVELOPMENT 2;	SubName: Full=Uncharacterized protein {ECO:0000313|EMBL:KNA25851.1};	Long-chain acyl-CoA synthetases (AMP-forming)	GO:0005783,endoplasmic reticulum; GO:0009506,plasmodesma; GO:0005524,ATP binding; GO:0102391,decanoate-CoA ligase activity; GO:0004467,long-chain fatty acid-CoA ligase activity; GO:0031957,very long-chain fatty acid-CoA ligase activity; GO:0010143,cutin biosynthetic process; GO:0050832,defense response to fungus; GO:0006631,fatty acid metabolic process; GO:0010311,lateral root formation	PF00501.28:AMP-binding enzyme
gene-LOC110728925	10.38	7.25	0	0	0	0	287	191	0	0	0	0	-9.59761	0.000686932	0.0434203	down	NW_018742205.1	2460846	2463470	-	LOC110728925	--	--	--	bark storage protein A-like [Chenopodium quinoa]	RecName: Full=Bark storage protein A; Flags: Precursor;	SubName: Full=Uncharacterized protein {ECO:0000313|EMBL:OAY41744.1};	--	GO:0003824,catalytic activity; GO:0045735,nutrient reservoir activity; GO:0009116,nucleoside metabolic process	PF01048.20:Phosphorylase superfamily
gene-LOC110707653	13.87	16.82	0	0	0	0	219	253	0	0	0	0	-9.58947	0.000691171	0.0435443	down	NW_018745003.1	3923157	3924379	+	LOC110707653	--	K20729 protein EPIDERMAL PATTERNING FACTOR 1/2 | (RefSeq) protein EPIDERMAL PATTERNING FACTOR 1-like (A)	ko04016: MAPK signaling pathway - plant	protein EPIDERMAL PATTERNING FACTOR 1-like [Chenopodium quinoa]	RecName: Full=Protein EPIDERMAL PATTERNING FACTOR 1 {ECO:0000303|PubMed:17639078}; Contains: RecName: Full=MEPF1 {ECO:0000303|PubMed:22241782}; Flags: Precursor;	SubName: Full=Uncharacterized protein {ECO:0000313|EMBL:KNA20739.1};	--	GO:0005576,extracellular region; GO:0010052,guard cell differentiation; GO:2000122,negative regulation of stomatal complex development; GO:0010374,stomatal complex development; GO:0010375,stomatal complex patterning	PF17181.4:Epidermal patterning factor proteins
gene-LOC110700533	16.01	15.12	18.45	6.47	2.32	1.8	704	633	665	281	95	65	-2.19988	0.000691585	0.0435443	down	NW_018744626.1	3565195	3568289	+	LOC110700533	--	K14638 solute carrier family 15 (peptide/histidine transporter), member 3/4 | (RefSeq) protein NRT1/ PTR FAMILY 4.6-like (A)	--	protein NRT1/ PTR FAMILY 4.6-like [Chenopodium quinoa]	RecName: Full=Protein NRT1/ PTR FAMILY 4.6; Short=AtNPF4.6; AltName: Full=Nitrate transporter 1.2; AltName: Full=Nitrate transporter NTL1; AltName: Full=Protein ABA-IMPORTING TRANSPORTER 1;	SubName: Full=Uncharacterized protein {ECO:0000313|EMBL:KNA14366.1};	H+/oligopeptide symporter	GO:0016021,integral component of membrane; GO:0005886,plasma membrane; GO:0090440,abscisic acid transmembrane transporter activity; GO:0015293,symporter activity; GO:0080168,abscisic acid transport; GO:0042128,nitrate assimilation; GO:0010119,regulation of stomatal movement; GO:0009624,response to nematode	PF00854.21:POT family
gene-LOC110737802	2.74	2.87	6.43	9.49	23.39	30.78	66	66	127	226	525	608	2.38631	0.00070172	0.0440966	up	NW_018743331.1	4494860	4498290	+	LOC110737802	--	--	--	pathogen-related protein-like [Chenopodium quinoa]	RecName: Full=Pathogen-related protein;	SubName: Full=Uncharacterized protein {ECO:0000313|EMBL:KNA08989.1};	--	GO:0006952,defense response; GO:0009607,response to biotic stimulus	--
novel.8013	2.87196	3.21333	8.5046	8.07681	61.933	50.8326	168	178	503	479	3783	2788	2.98196	0.000709741	0.0445143	up	NW_018745403.1	429813	430450	.	--	--	--	--	--	--	--	--	--	--
gene-LOC110734023	16.19	13.86	7.91	24.11	37.72	34.73	627	511	251	922	1360	1102	1.36487	0.000722303	0.0451125	up	NW_018743206.1	825337	830996	+	LOC110734023	--	K08202 MFS transporter, OCT family, solute carrier family 22 (organic cation transporter), member 4/5 | (RefSeq) organic cation/carnitine transporter 4-like (A)	--	organic cation/carnitine transporter 7-like [Chenopodium quinoa]	RecName: Full=Organic cation/carnitine transporter 7; Short=AtOCT7;	SubName: Full=Uncharacterized protein {ECO:0000313|EMBL:KNA24584.1};	Synaptic vesicle transporter SV2 (major facilitator superfamily)	GO:0016021,integral component of membrane; GO:0005886,plasma membrane; GO:0005524,ATP binding; GO:0090417,N-methylnicotinate transmembrane transporter activity; GO:0090416,nicotinate transmembrane transporter activity; GO:2001143,N-methylnicotinate transport; GO:2001142,nicotinate transport	PF00083.24:Sugar (and other) transporter
gene-LOC110712354	2.43	1.84	1.52	0.3	0.17	0.43	123	89	63	15	8	18	-2.64401	0.000723222	0.0451125	down	NW_018745323.1	2251884	2255779	-	LOC110712354	--	K17506 protein phosphatase 1L [EC:3.1.3.16] | (RefSeq) probable protein phosphatase 2C 25 (A)	--	probable protein phosphatase 2C 14 [Chenopodium quinoa]	RecName: Full=Probable protein phosphatase 2C 14; Short=AtPP2C14; EC=3.1.3.16; AltName: Full=Protein phosphatase AP2C4;	SubName: Full=Uncharacterized protein {ECO:0000313|EMBL:KNA25716.1};	Serine/threonine protein phosphatase	GO:0046872,metal ion binding; GO:0004722,protein serine/threonine phosphatase activity	PF00481.21:Protein phosphatase 2C
gene-LOC110688533	8.74	8.53	15.53	27.62	31.76	87.48	294	273	428	917	994	2410	2.17756	0.000723461	0.0451125	up	NW_018742309.1	5293395	5299115	-	LOC110688533	--	K00499 choline monooxygenase [EC:1.14.15.7] | (RefSeq) choline monooxygenase, chloroplastic-like (A)	ko00260: Glycine, serine and threonine metabolism	choline monooxygenase, chloroplastic-like [Chenopodium quinoa]	RecName: Full=Choline monooxygenase, chloroplastic; EC=1.14.15.7; Flags: Precursor;	SubName: Full=Choline monooxygenase {ECO:0000313|EMBL:AFG28558.1};	--	GO:0009570,chloroplast stroma; GO:0051537,2 iron, 2 sulfur cluster binding; GO:0019133,choline monooxygenase activity; GO:0005506,iron ion binding; GO:0016708,oxidoreductase activity, acting on paired donors, with incorporation or reduction of molecular oxygen, NAD(P)H as one donor, and incorporation of two atoms of oxygen into one donor; GO:0019439,aromatic compound catabolic process; GO:0019285…	PF00848.19:Ring hydroxylating alpha subunit (catalytic domain)
gene-LOC110684095	11.1	11.51	4.13	22.44	27.36	43.26	544	537	166	1086	1248	1737	1.84031	0.000728904	0.0453645	up	NW_018743697.1	1485772	1493394	+	LOC110684095	--	--	--	ACT domain-containing protein ACR9-like [Chenopodium quinoa]	RecName: Full=ACT domain-containing protein ACR9 {ECO:0000305}; AltName: Full=Protein ACT DOMAIN REPEATS 9 {ECO:0000303|PubMed:21861936};	SubName: Full=Uncharacterized protein {ECO:0000313|EMBL:KNA21710.1};	--	--	PF01842.25:ACT domain
gene-LOC110719467	7.18	7.07	8.99	13.43	26.41	19.47	317	297	325	585	1085	704	1.33876	0.000732746	0.045516	up	NW_018742204.1	15152983	15159370	+	LOC110719467	--	K14638 solute carrier family 15 (peptide/histidine transporter), member 3/4 | (RefSeq) protein NRT1/ PTR FAMILY 3.1-like (A)	--	protein NRT1/ PTR FAMILY 3.1-like [Chenopodium quinoa]	RecName: Full=Protein NRT1/ PTR FAMILY 3.1; Short=AtNPF3.1;	SubName: Full=Uncharacterized protein {ECO:0000313|EMBL:KNA04259.1};	H+/oligopeptide symporter	GO:0016021,integral component of membrane; GO:0097708,intracellular vesicle; GO:0005886,plasma membrane; GO:0022857,transmembrane transporter activity; GO:0010336,gibberellic acid homeostasis; GO:0042128,nitrate assimilation	PF00854.21:POT family
gene-LOC110698088	5.4	7.52	12.37	0.66	0	0.6	199	264	374	24	0	18	-4.28928	0.00075665	0.0469108	down	NW_018744502.1	6592541	6594331	+	LOC110698088	--	--	--	--	--	--	--	--	--
gene-LOC110693874	39.92	39.53	1.04	2.54	2.41	0.43	2291	2160	49	144	129	20	-3.86885	0.000759534	0.0469996	down	NW_018744167.1	2029360	2032978	+	LOC110693874	--	K04079 molecular chaperone HtpG | (RefSeq) heat shock protein 83 (A)	ko04141: Protein processing in endoplasmic reticulum; ko04626: Plant-pathogen interaction	heat shock protein 83 [Chenopodium quinoa]	RecName: Full=Heat shock protein 83;	SubName: Full=mRNA, clone: RTFL01-28-H06 {ECO:0000313|EMBL:BAJ34368.1};	Molecular chaperone (HSP90 family)	GO:0005737,cytoplasm; GO:0005524,ATP binding; GO:0051082,unfolded protein binding; GO:0006457,protein folding; GO:0006950,response to stress	PF00183.18:Hsp90 protein
gene-LOC110698128	27.79	26.82	26.3	3.96	12.73	8.92	1137	1045	882	160	485	299	-1.67417	0.000770239	0.0475711	down	NW_018744502.1	7567170	7570144	-	LOC110698128	--	K15397 3-ketoacyl-CoA synthase [EC:2.3.1.199] | (RefSeq) 3-ketoacyl-CoA synthase 11-like (A)	ko00062: Fatty acid elongation; ko04626: Plant-pathogen interaction	3-ketoacyl-CoA synthase 11-like [Chenopodium quinoa]	RecName: Full=3-ketoacyl-CoA synthase 2 {ECO:0000303|PubMed:18465198}; Short=KCS-2 {ECO:0000303|PubMed:18465198}; EC=2.3.1.199 {ECO:0000305}; AltName: Full=Docosanoic acid synthase {ECO:0000303|PubMed:18786002}; AltName: Full=Very long-chain fatty acid condensing enzyme 2 {ECO:0000303|PubMed:18465198}; Short=VLCFA condensing enzyme 2 {ECO:0000303|PubMed:18465198};	RecName: Full=3-ketoacyl-CoA synthase {ECO:0000256|PIRNR:PIRNR036417}; EC=2.3.1.- {ECO:0000256|PIRNR:PIRNR036417};	--	GO:0016021,integral component of membrane; GO:0102336,3-oxo-arachidoyl-CoA synthase activity; GO:0102337,3-oxo-cerotoyl-CoA synthase activity; GO:0102338,3-oxo-lignoceronyl-CoA synthase activity; GO:0009922,fatty acid elongase activity; GO:0102756,very-long-chain 3-ketoacyl-CoA synthase activity; GO:0006633,fatty acid biosynthetic process; GO:0006970,response to osmotic stress; GO:0009611,respons…	PF08392.12:FAE1/Type III polyketide synthase-like protein
gene-LOC110686448	693.71	737.45	1414.04	2148.59	2815.13	2882.51	9570	9687	15991	29269	36152	32582	1.45026	0.00077479	0.047754	up	NW_018743858.1	4949454	4951633	+	LOC110686448	--	--	--	gibberellin-regulated protein 1-like [Chenopodium quinoa]	RecName: Full=Gibberellin-regulated protein 1; AltName: Full=GAST1 protein homolog 1; Flags: Precursor;	SubName: Full=Uncharacterized protein {ECO:0000313|EMBL:KNA07106.1};	--	GO:0005618,cell wall; GO:0005576,extracellular region; GO:0009505,plant-type cell wall; GO:0009740,gibberellic acid mediated signaling pathway; GO:0009737,response to abscisic acid; GO:0009741,response to brassinosteroid; GO:0009739,response to gibberellin; GO:0009826,unidimensional cell growth	PF02704.14:Gibberellin regulated protein
gene-LOC110738831	4.12	4.55	4.02	10.57	11.73	8.83	95	100	76	241	252	167	1.30275	0.000776614	0.047754	up	NW_018743397.1	16373	30847	-	LOC110738831	--	--	--	uncharacterized protein LOC110738831 [Chenopodium quinoa]	--	SubName: Full=Uncharacterized protein {ECO:0000313|EMBL:KNA25471.1};	--	GO:0016021,integral component of membrane	PF06749.12:Protein of unknown function (DUF1218)
gene-LOC110731285	0.63	1.17	6.09	0.08	0.12	0	17	30	134	2	3	0	-5.39402	0.000777627	0.047754	down	NW_018743066.1	1183356	1184658	-	LOC110731285	--	K10143 E3 ubiquitin-protein ligase RFWD2 [EC:2.3.2.27] | (RefSeq) E3 ubiquitin-protein ligase COP1-like (A)	ko04120: Ubiquitin mediated proteolysis; ko04712: Circadian rhythm - plant	uncharacterized protein LOC110731285 [Chenopodium quinoa]	RecName: Full=Probable E3 ubiquitin-protein ligase LUL4; EC=2.3.2.27; AltName: Full=Probable RING-type E3 ubiquitin transferase LUL4 {ECO:0000305}; AltName: Full=Protein LOG2-LIKE UBIQUITIN LIGASE 4; AltName: Full=RING finger protein 208;	SubName: Full=Apoptosis 1 inhibitor {ECO:0000313|EMBL:JAU92043.1}; Flags: Fragment;	--	GO:0046872,metal ion binding; GO:0004842,ubiquitin-protein transferase activity	PF13920.6:Zinc finger, C3HC4 type (RING finger)
gene-LOC110723719	14.14	13.81	19.49	27.16	58.04	41.18	539	501	609	1022	2059	1286	1.39465	0.000781846	0.0479221	up	NW_018742204.1	22236687	22250014	-	LOC110723719	--	K03327 multidrug resistance protein, MATE family | (RefSeq) protein DETOXIFICATION 27-like (A)	--	protein DETOXIFICATION 27-like [Chenopodium quinoa]	RecName: Full=Protein DETOXIFICATION 27 {ECO:0000303|PubMed:11739388}; Short=AtDTX27 {ECO:0000303|PubMed:11739388}; AltName: Full=Multidrug and toxic compound extrusion protein 27 {ECO:0000305}; Short=MATE protein 27 {ECO:0000305};	RecName: Full=Protein DETOXIFICATION {ECO:0000256|RuleBase:RU004914}; AltName: Full=Multidrug and toxic compound extrusion protein {ECO:0000256|RuleBase:RU004914};	Uncharacterized membrane protein, predicted efflux pump	GO:0016021,integral component of membrane; GO:0015297,antiporter activity; GO:0015238,drug transmembrane transporter activity; GO:0006855,drug transmembrane transport	PF01554.18:MatE
gene-LOC110713689	36.22	32.64	37.15	15.01	20.92	15.22	584	501	491	239	314	201	-1.05368	0.000794325	0.048595	down	NW_018745448.1	7851171	7855168	+	LOC110713689	--	K12832 splicing factor 3B subunit 5 | (RefSeq) uncharacterized protein At4g14342-like (A)	ko03040: Spliceosome	uncharacterized protein At4g14342-like [Chenopodium quinoa]	RecName: Full=Uncharacterized protein At3g23325;	SubName: Full=uncharacterized protein At4g14342-like {ECO:0000313|RefSeq:XP_016730178.1};	Uncharacterized conserved protein	GO:0071011,precatalytic spliceosome; GO:0005689,U12-type spliceosomal complex; GO:0005686,U2 snRNP; GO:0000398,mRNA splicing, via spliceosome	PF07189.11:Splicing factor 3B subunit 10 (SF3b10)
gene-LOC110731856	152.06	170.67	0	0	0	0	2605	2784	0	0	0	0	-13.1009	0.000798419	0.0487533	down	NW_018743099.1	1987334	1988165	-	LOC110731856	--	--	--	glycine-rich protein 5-like [Chenopodium quinoa]	--	SubName: Full=Uncharacterized protein {ECO:0000313|EMBL:KNA05420.1};	--	--	--
novel.1616	0.278341	0.195513	0	4.65551	0.265303	8.38295	25	16	0	410	25	683	5.03313	0.000804544	0.0489575	up	NW_018742720.1	1536498	1537483	-	--	--	--	--	uncharacterized protein LOC110712206 [Chenopodium quinoa]	--	SubName: Full=Uncharacterized protein {ECO:0000313|EMBL:EOY31402.1};	--	--	--
gene-LOC110689250	1.54	0.98	3.82	0.24	0.22	0.4	122	74	248	19	16	26	-2.89251	0.00080479	0.0489575	down	NW_018743955.1	5967524	5971365	+	LOC110689250	--	K13430 serine/threonine-protein kinase PBS1 [EC:2.7.11.1] | (RefSeq) probable serine/threonine-protein kinase PBL7 isoform X1 (A)	ko04626: Plant-pathogen interaction	serine/threonine-protein kinase-like protein ACR4 [Chenopodium quinoa]	RecName: Full=Serine/threonine-protein kinase-like protein ACR4; EC=2.7.11.1; AltName: Full=Protein CRINKLY 4; Short=AtCR4; Flags: Precursor;	SubName: Full=serine/threonine-protein kinase-like protein ACR4 {ECO:0000313|RefSeq:XP_018806220.1, ECO:0000313|RefSeq:XP_018806229.1};	--	GO:0009986,cell surface; GO:0030139,endocytic vesicle; GO:0016021,integral component of membrane; GO:0032585,multivesicular body membrane; GO:0005886,plasma membrane; GO:0005524,ATP binding; GO:0042803,protein homodimerization activity; GO:0004674,protein serine/threonine kinase activity; GO:0019199,transmembrane receptor protein kinase activity; GO:0009793,embryo development ending in seed dorma…	PF00069.25:Protein kinase domain
gene-LOC110731115	337.15	304.52	555.76	36.73	135.49	132.22	4908	4221	6632	528	1836	1577	-1.99912	0.00081042	0.0492076	down	NW_018742205.1	7068848	7069948	+	LOC110731115	--	--	--	non-specific lipid-transfer protein-like [Chenopodium quinoa]	RecName: Full=Non-specific lipid-transfer protein; Short=LTP; Flags: Precursor;	RecName: Full=Non-specific lipid-transfer protein {ECO:0000256|RuleBase:RU000628};	--	GO:0008289,lipid binding; GO:0050832,defense response to fungus; GO:0031640,killing of cells of other organism; GO:0006869,lipid transport	PF00234.22:Protease inhibitor/seed storage/LTP family
novel.155	2.98206	2.97415	0	0	0	0	230	218	0	0	0	0	-9.51055	0.000822029	0.049819	down	NW_018742204.1	18726913	18727757	.	--	--	--	--	hypothetical protein SOVF_113330 [Spinacia oleracea]	--	SubName: Full=Uncharacterized protein {ECO:0000313|EMBL:KNA13811.1};	--	GO:0016021,integral component of membrane	--
