# Supplementary material for: Transcriptome and Metabolome Analyses Reveal Mechanisms Underlying the Response of Quinoa Seedlings to Nitrogen Fertilizers
Source: Int J Mol Sci. 2023 Jul 18;24(14):11580. doi: 10.3390/ijms241411580 (PMC10380953; doi:10.3390/ijms241411580)
Supplement: Supplementary file 1 [file ijms-24-11580-s001.zip › Table S7.xlsx]

## Sheet: Sheet1
Table S7 Differential genes of red quinoa in HN vs CK
ID	R2-4_fpkm	R2-5_fpkm	R2-6_fpkm	R3-4_fpkm	R3-5_fpkm	R3-6_fpkm	R2-4_count	R2-5_count	R2-6_count	R3-4_count	R3-5_count	R3-6_count	log2FoldChange	pvalue	padj	regulated	chr	start	end	strand	gene_name	gene_description	KEGG	KEGG pathway	NR	Swissprot	Tremble	KOG	GO	Pfam
gene-LOC110681841	4.06	4.83	4.63	6.91	10.72	16.01	346	392	323	368	848	1195	1.39933	0.000505758	0.0479135	up	NW_018742244.1	2925108	2931370	+	LOC110681841	--	K05387 glutamate receptor, ionotropic, plant | (RefSeq) glutamate receptor 3.2-like isoform X1 (A)	--	glutamate receptor 3.2-like isoform X1 [Chenopodium quinoa]	RecName: Full=Glutamate receptor 3.2; Short=AtGluR2; AltName: Full=Ligand-gated ion channel 3.2; Flags: Precursor;	RecName: Full=Glutamate receptor {ECO:0000256|PIRNR:PIRNR037090};	Glutamate-gated kainate-type ion channel receptor subunit GluR5 and related subunits	GO:0016021,integral component of membrane; GO:0005622,intracellular; GO:0005886,plasma membrane; GO:0005262,calcium channel activity; GO:0008066,glutamate receptor activity; GO:0004970,ionotropic glutamate receptor activity; GO:0006816,calcium ion transport; GO:0019722,calcium-mediated signaling; GO:0071230,cellular response to amino acid stimulus	PF01094.28:Receptor family ligand binding region
gene-LOC110681981	0.15	0.59	0	8.94	2.41	7.14	4	15	0	150	60	168	4.86294	0.000336553	0.0355305	up	NW_018743574.1	2208169	2209471	+	LOC110681981	--	--	--	uncharacterized protein LOC110681981 [Chenopodium quinoa]	--	SubName: Full=Uncharacterized protein {ECO:0000313|EMBL:KNA20593.1};	--	GO:0016021,integral component of membrane	--
gene-LOC110682183	99.72	87.49	90.43	220.4	202.75	192.41	3780	3158	2810	5226	7137	6393	1.29418	1.07268e-05	0.00323859	up	NW_018743574.1	4315747	4317587	-	LOC110682183	--	--	--	protein ALP1-like [Chenopodium quinoa]	RecName: Full=Protein ALP1-like {ECO:0000305}; EC=3.1.-.-;	SubName: Full=Uncharacterized protein {ECO:0000313|EMBL:KNA24991.1};	Predicted transposase	GO:0005634,nucleus; GO:0046872,metal ion binding; GO:0004518,nuclease activity	PF13359.6:DDE superfamily endonuclease
gene-LOC110682308	84.79	77.45	78.69	103.01	157.02	208.78	4691	4080	3569	3565	8067	10125	1.05434	0.000529051	0.0496832	up	NW_018743574.1	5741523	5748371	-	LOC110682308	--	K09838 zeaxanthin epoxidase [EC:1.14.15.21] | (RefSeq) zeaxanthin epoxidase, chloroplastic-like isoform X1 (A)	ko00906: Carotenoid biosynthesis	zeaxanthin epoxidase, chloroplastic-like isoform X1 [Chenopodium quinoa]	RecName: Full=Zeaxanthin epoxidase, chloroplastic {ECO:0000255|PIRNR:PIRNR036989}; EC=1.14.15.21 {ECO:0000269|PubMed:8521963}; Flags: Precursor;	RecName: Full=Zeaxanthin epoxidase, chloroplastic {ECO:0000256|PIRNR:PIRNR036989}; EC=1.14.15.21 {ECO:0000256|PIRNR:PIRNR036989};	Kynurenine 3-monooxygenase and related flavoprotein monooxygenases	GO:0009535,chloroplast thylakoid membrane; GO:0071949,FAD binding; GO:0009540,zeaxanthin epoxidase [overall] activity; GO:0009688,abscisic acid biosynthetic process	PF01494.19:FAD binding domain
gene-LOC110682359	43	45.19	56.13	73.26	101.27	113.39	1599	1600	1711	1704	3497	3696	1.09442	0.000495004	0.047311	up	NW_018743574.1	6510702	6512507	+	LOC110682359	--	K09422 transcription factor MYB, plant | (RefSeq) transcription factor MYB44-like (A)	--	transcription factor MYB44-like [Chenopodium quinoa]	RecName: Full=Transcription factor MYB73 {ECO:0000303|PubMed:11597504}; AltName: Full=Myb-related protein 73 {ECO:0000303|PubMed:11597504}; Short=AtMYB73 {ECO:0000303|PubMed:11597504};	SubName: Full=Uncharacterized protein {ECO:0000313|EMBL:KNA12256.1};	Transcription factor, Myb superfamily	GO:0005634,nucleus; GO:0003700,DNA-binding transcription factor activity; GO:0000981,DNA-binding transcription factor activity, RNA polymerase II-specific; GO:0043565,sequence-specific DNA binding; GO:0001135,RNA polymerase II transcription regulator recruiting activity; GO:0044212,transcription regulatory region DNA binding; GO:0030154,cell differentiation; GO:0019760,glucosinolate metabolic pro…	PF00249.31:Myb-like DNA-binding domain
gene-LOC110682434	9.46	7.19	5.77	20.38	17.8	23.97	308	223	154	415	538	684	1.61082	2.11881e-05	0.00547584	up	NW_018743574.1	7294260	7298831	+	LOC110682434	--	K00860 adenylylsulfate kinase [EC:2.7.1.25] | (RefSeq) adenylyl-sulfate kinase 3-like isoform X1 (A)	ko00230: Purine metabolism; ko00920: Sulfur metabolism	adenylyl-sulfate kinase 3-like isoform X1 [Chenopodium quinoa]	RecName: Full=Adenylyl-sulfate kinase, chloroplastic; EC=2.7.1.25; AltName: Full=ATP adenosine-5'-phosphosulfate 3'-phosphotransferase; AltName: Full=Adenosine-5'-phosphosulfate kinase; Short=APS kinase; Flags: Precursor;	RecName: Full=Adenylyl-sulfate kinase {ECO:0000256|RuleBase:RU004347}; EC=2.7.1.25 {ECO:0000256|RuleBase:RU004347};	Adenosine 5'-phosphosulfate kinase	GO:0009507,chloroplast; GO:0004020,adenylylsulfate kinase activity; GO:0005524,ATP binding; GO:0019344,cysteine biosynthetic process; GO:0070814,hydrogen sulfide biosynthetic process; GO:0000103,sulfate assimilation	PF01583.20:Adenylylsulphate kinase
gene-LOC110682605	0.05	0.02	0	0.76	0.65	1.18	3	1	0	31	39	67	5.47969	0.000105246	0.0175256	up	NW_018743574.1	8405334	8412222	+	LOC110682605	--	--	--	--	--	--	--	--	--
gene-LOC110682782	103.54	99.28	130.21	37.57	48.27	40.59	1714	1565	1767	389	742	589	-1.2804	0.000191909	0.0253045	down	NW_018743593.1	2217251	2221333	-	LOC110682782	--	--	--	uncharacterized protein LOC110682782 [Chenopodium quinoa]	--	SubName: Full=Uncharacterized protein {ECO:0000313|EMBL:KNA21683.1};	--	--	PF17250.2:NADH-ubiquinone oxidoreductase 11 kDa subunit
gene-LOC110683047	1.86	1.56	2.42	4.75	14.95	16.38	94	75	100	150	701	725	2.68426	9.91906e-06	0.00305177	up	NW_018743616.1	2571653	2576101	-	LOC110683047	--	--	--	IQ domain-containing protein IQM1-like [Chenopodium quinoa]	RecName: Full=IQ domain-containing protein IQM1 {ECO:0000305}; AltName: Full=IQ motif-containing protein 1 {ECO:0000303|Ref.6};	SubName: Full=Calmodulin-binding protein {ECO:0000313|EMBL:ABM55247.1};	--	GO:0005737,cytoplasm; GO:0005634,nucleus; GO:0005516,calmodulin binding; GO:0010119,regulation of stomatal movement	PF00612.27:IQ calmodulin-binding motif
gene-LOC110683223	74.83	76.7	139.12	300.91	263.46	504.06	3120	3045	4755	7848	10201	18422	1.95721	3.44248e-05	0.0076693	up	NW_018743635.1	37908	46118	+	LOC110683223	--	K05929 phosphoethanolamine N-methyltransferase [EC:2.1.1.103] | (RefSeq) phosphoethanolamine N-methyltransferase (A)	ko00564: Glycerophospholipid metabolism	phosphoethanolamine N-methyltransferase [Chenopodium quinoa]	RecName: Full=Phosphoethanolamine N-methyltransferase; EC=2.1.1.103;	SubName: Full=Phosphoethanolamine N-methyltransferase {ECO:0000313|EMBL:AEY75253.1};	SAM-dependent methyltransferases	GO:0005737,cytoplasm; GO:0000234,phosphoethanolamine N-methyltransferase activity; GO:0006656,phosphatidylcholine biosynthetic process	PF08241.12:Methyltransferase domain
gene-LOC110683384	4.9	4.32	4.1	13.65	16.64	41.88	124	104	85	216	391	929	2.51206	6.33084e-06	0.00219912	up	NW_018743669.1	408523	411029	-	LOC110683384	--	--	--	uncharacterized protein LOC110683384 [Chenopodium quinoa]	--	SubName: Full=Uncharacterized protein {ECO:0000313|EMBL:KNA03155.1};	--	--	--
gene-LOC110683494	64.61	61.26	56.79	224.28	193.24	236.57	2018	1822	1454	4382	5605	6477	1.97891	7.9257e-14	5.12079e-10	up	NW_018743669.1	1393467	1395787	+	LOC110683494	--	K17506 protein phosphatase 1L [EC:3.1.3.16] | (RefSeq) probable protein phosphatase 2C 25 (A)	--	probable protein phosphatase 2C 25 [Chenopodium quinoa]	RecName: Full=Probable protein phosphatase 2C 25; Short=AtPP2C25; EC=3.1.3.16; AltName: Full=Protein phosphatase AP2C1;	SubName: Full=Uncharacterized protein {ECO:0000313|EMBL:KNA23214.1};	Serine/threonine protein phosphatase	GO:0005634,nucleus; GO:0009536,plastid; GO:0046872,metal ion binding; GO:0004722,protein serine/threonine phosphatase activity; GO:0009738,abscisic acid-activated signaling pathway; GO:0050832,defense response to fungus; GO:0009620,response to fungus; GO:0009611,response to wounding	PF00481.21:Protein phosphatase 2C
gene-LOC110683732	5.79	4.2	7.32	12.24	17.2	19.42	220	152	228	291	607	647	1.58964	0.000367091	0.0377671	up	NW_018743691.1	2038101	2041156	-	LOC110683732	--	K03231 elongation factor 1-alpha | (RefSeq) elongation factor 1-alpha-like (A)	ko03013: RNA transport	elongation factor 1-alpha-like [Chenopodium quinoa]	RecName: Full=Elongation factor 1-alpha; Short=EF-1-alpha;	RecName: Full=Elongation factor 1-alpha {ECO:0000256|RuleBase:RU000325};	Translation elongation factor EF-1 alpha/Tu	GO:0005737,cytoplasm; GO:0005622,intracellular; GO:0005525,GTP binding; GO:0003924,GTPase activity; GO:0003746,translation elongation factor activity	PF00009.27:Elongation factor Tu GTP binding domain
gene-LOC110683793	26.01	25.07	10.17	2.2	3.91	5.65	415	381	133	22	58	79	-2.26285	0.000373713	0.0380951	down	NW_018743691.1	3683323	3684912	+	LOC110683793	--	--	--	--	--	--	--	--	--
gene-LOC110684038	0.23	0.12	0	1.72	1.89	4.26	14	7	0	65	106	225	4.59811	0.000179479	0.0242598	up	NW_018743697.1	932242	935169	-	LOC110684038	--	K14494 DELLA protein | (RefSeq) DELLA protein GAI-like (A)	ko04075: Plant hormone signal transduction	scarecrow-like protein 30 [Chenopodium quinoa]	RecName: Full=Scarecrow-like protein 14; Short=AtSCL14; AltName: Full=GRAS family protein 2; Short=AtGRAS-2;	SubName: Full=Uncharacterized protein {ECO:0000313|EMBL:KNA10642.1};	--	GO:0005829,cytosol; GO:0005634,nucleus; GO:0003700,DNA-binding transcription factor activity; GO:0043565,sequence-specific DNA binding; GO:0045893,positive regulation of transcription, DNA-templated; GO:0006355,regulation of transcription, DNA-templated; GO:0009410,response to xenobiotic stimulus; GO:0006351,transcription, DNA-templated	PF03514.14:GRAS domain family
gene-LOC110684094	547.93	594.87	228.44	76.51	55.86	22.81	6961	7196	2379	608	659	254	-2.91661	8.09337e-06	0.00271288	down	NW_018743697.1	1474816	1475432	-	LOC110684094	--	K11254 histone H4 | (RefSeq) histone H4 (A)	--	hypothetical protein SETIT_032292mg, partial [Setaria italica]	RecName: Full=Histone H4;	RecName: Full=Histone H4 {ECO:0000256|RuleBase:RU000528}; Flags: Fragment;	Histone H4	GO:0009507,chloroplast; GO:0005829,cytosol; GO:0000788,nuclear nucleosome; GO:0005730,nucleolus; GO:0005886,plasma membrane; GO:0009506,plasmodesma; GO:0009579,thylakoid; GO:0005774,vacuolar membrane; GO:0003677,DNA binding; GO:0042393,histone binding; GO:0046982,protein heterodimerization activity; GO:0006334,nucleosome assembly; GO:0009414,response to water deprivation	PF15511.6:Centromere kinetochore component CENP-T histone fold
gene-LOC110684199	8.54	9.19	8.14	22.63	43.91	51.16	411	421	321	681	1962	2158	2.27655	9.00852e-10	9.09439e-07	up	NW_018743697.1	2473359	2476551	-	LOC110684199	--	K13424 WRKY transcription factor 33 | (RefSeq) WRKY transcription factor WRKY24-like (A)	ko04016: MAPK signaling pathway - plant; ko04626: Plant-pathogen interaction	WRKY transcription factor WRKY24-like [Chenopodium quinoa]	RecName: Full=WRKY transcription factor WRKY24 {ECO:0000303|PubMed:16919842}; Short=OsWRKY24 {ECO:0000303|PubMed:16919842};	SubName: Full=Uncharacterized protein {ECO:0000313|EMBL:KNA04751.1};	--	GO:0005634,nucleus; GO:0003700,DNA-binding transcription factor activity; GO:0043565,sequence-specific DNA binding; GO:0009738,abscisic acid-activated signaling pathway; GO:0009740,gibberellic acid mediated signaling pathway; GO:0009788,negative regulation of abscisic acid-activated signaling pathway; GO:0009938,negative regulation of gibberellic acid mediated signaling pathway; GO:0045893,positi…	PF03106.15:WRKY DNA -binding domain
gene-LOC110684228	11.45	13.73	8.05	18.56	26.44	33.34	345	394	199	350	740	881	1.35359	0.000315585	0.0343957	up	NW_018743697.1	2770765	2772589	+	LOC110684228	--	K00430 peroxidase [EC:1.11.1.7] | (RefSeq) cationic peroxidase 2-like (A)	ko00940: Phenylpropanoid biosynthesis	cationic peroxidase 2-like [Chenopodium quinoa]	RecName: Full=Cationic peroxidase 2; EC=1.11.1.7; AltName: Full=PNPC2; Flags: Precursor;	RecName: Full=Peroxidase {ECO:0000256|RuleBase:RU362060, ECO:0000256|SAAS:SAAS00709852}; EC=1.11.1.7 {ECO:0000256|RuleBase:RU362060, ECO:0000256|SAAS:SAAS00709852};	--	GO:0005576,extracellular region; GO:0020037,heme binding; GO:0046872,metal ion binding; GO:0004601,peroxidase activity; GO:0042744,hydrogen peroxide catabolic process; GO:0006979,response to oxidative stress	PF00141.23:Peroxidase
gene-LOC110684309	12.71	14.94	8.29	3.57	3.93	3.36	501	561	268	88	144	116	-1.57406	0.000306897	0.0338372	down	NW_018743697.1	3567517	3575860	+	LOC110684309	--	K10752 histone-binding protein RBBP4 | (RefSeq) WD-40 repeat-containing protein MSI4-like (A)	--	WD-40 repeat-containing protein MSI4-like [Chenopodium quinoa]	RecName: Full=WD-40 repeat-containing protein MSI4; AltName: Full=Altered cold-responsive gene 1 protein;	SubName: Full=Uncharacterized protein {ECO:0000313|EMBL:KNA10670.1};	Nucleosome remodeling factor, subunit CAF1/NURF55/MSI1	GO:0080008,Cul4-RING E3 ubiquitin ligase complex; GO:0005737,cytoplasm; GO:0005829,cytosol; GO:0005730,nucleolus; GO:0005634,nucleus; GO:0046872,metal ion binding; GO:0030154,cell differentiation; GO:0016569,covalent chromatin modification; GO:0006281,DNA repair; GO:0009908,flower development; GO:0006355,regulation of transcription, DNA-templated; GO:0010224,response to UV-B; GO:0006351,transcrip…	PF12265.8:Histone-binding protein RBBP4 or subunit C of CAF1 complex
gene-LOC110684429	2.88	3.21	3.76	5.9	7.97	11.51	207	219	221	265	531	724	1.45439	0.000416736	0.0410947	up	NW_018743697.1	5013215	5022565	-	LOC110684429	--	--	--	--	--	--	--	--	--
gene-LOC110684974	56.1	59.55	73.42	165.29	138.19	177.25	2241	2265	2404	4130	5126	6206	1.47015	1.01622e-05	0.00309706	up	NW_018743791.1	197030	199533	+	LOC110684974	--	K13424 WRKY transcription factor 33 | (RefSeq) WRKY transcription factor WRKY24-like (A)	ko04016: MAPK signaling pathway - plant; ko04626: Plant-pathogen interaction	probable WRKY transcription factor 40 isoform X1 [Chenopodium quinoa]	RecName: Full=Probable WRKY transcription factor 40; AltName: Full=WRKY DNA-binding protein 40;	SubName: Full=WRKY transcription factor 1 {ECO:0000313|EMBL:BAD06717.1};	--	GO:0005634,nucleus; GO:0003700,DNA-binding transcription factor activity; GO:0043565,sequence-specific DNA binding; GO:0044212,transcription regulatory region DNA binding; GO:0042742,defense response to bacterium; GO:0050832,defense response to fungus; GO:0045892,negative regulation of transcription, DNA-templated; GO:0031347,regulation of defense response; GO:0010200,response to chitin; GO:00022…	PF03106.15:WRKY DNA -binding domain
gene-LOC110684990	36.4	40.18	39.18	67.14	69.82	80.5	604	635	533	697	1076	1171	1.03346	0.000159691	0.022726	up	NW_018743791.1	375825	379073	-	LOC110684990	--	--	--	--	--	--	--	--	--
gene-LOC110685573	3.28	4.17	4.65	16.85	21.61	17.51	137	166	159	440	838	641	2.33149	4.22708e-09	3.79322e-06	up	NW_018743828.1	1714976	1718833	+	LOC110685573	--	K14209 solute carrier family 36 (proton-coupled amino acid transporter) | (RefSeq) amino acid transporter AVT3C-like (A)	--	amino acid permease 3-like [Chenopodium quinoa]	RecName: Full=Amino acid permease 3; AltName: Full=Amino acid transporter AAP3;	SubName: Full=Uncharacterized protein {ECO:0000313|EMBL:KNA08084.1};	Amino acid transporters	GO:0016021,integral component of membrane; GO:0031965,nuclear membrane; GO:0005886,plasma membrane; GO:0015171,amino acid transmembrane transporter activity; GO:0015293,symporter activity; GO:0003333,amino acid transmembrane transport; GO:0015802,basic amino acid transport	PF01490.18:Transmembrane amino acid transporter protein
gene-LOC110685979	0.6	0.23	0	5.4	4.3	7.17	38	14	0	214	253	398	4.51727	0.000242404	0.0294393	up	NW_018743850.1	3522775	3529415	+	LOC110685979	--	--	--	phosphate transporter PHO1 homolog 1-like isoform X1 [Chenopodium quinoa]	RecName: Full=Phosphate transporter PHO1 homolog 1; AltName: Full=Protein PHO1 homolog 1; Short=AtPHO1;H1;	SubName: Full=Uncharacterized protein {ECO:0000313|EMBL:KNA25584.1}; Flags: Fragment;	Predicted small molecule transporter	GO:0016021,integral component of membrane; GO:0005886,plasma membrane; GO:0005802,trans-Golgi network; GO:0016036,cellular response to phosphate starvation; GO:0006817,phosphate ion transport	PF03124.14:EXS family
gene-LOC110686720	0	0	0	0.6	0.62	1.44	0	0	0	26	40	87	8.34729	2.24227e-05	0.00552952	up	NW_018743893.1	1429501	1435484	-	LOC110686720	--	K01209 alpha-L-arabinofuranosidase [EC:3.2.1.55] | (RefSeq) alpha-L-arabinofuranosidase 1-like (A)	ko00520: Amino sugar and nucleotide sugar metabolism	alpha-L-arabinofuranosidase 1-like [Chenopodium quinoa]	RecName: Full=Alpha-L-arabinofuranosidase 1; Short=AtASD1; EC=3.2.1.55; AltName: Full=Beta-D-xylosidase; EC=3.2.1.-; Flags: Precursor;	SubName: Full=Uncharacterized protein {ECO:0000313|EMBL:KNA14942.1};	--	GO:0048046,apoplast; GO:0009505,plant-type cell wall; GO:0005578,NA; GO:0005773,vacuole; GO:0046556,alpha-L-arabinofuranosidase activity; GO:0009044,xylan 1,4-beta-xylosidase activity; GO:0046373,L-arabinose metabolic process; GO:0045493,xylan catabolic process	PF06964.12:Alpha-L-arabinofuranosidase C-terminal domain
gene-LOC110687413	2.47	3.03	1.36	11.71	9.1	7.68	142	166	64	421	486	387	2.23844	2.86149e-05	0.00669858	up	NW_018743919.1	3348187	3355951	-	LOC110687413	--	K07767 katanin p60 ATPase-containing subunit A1 [EC:5.6.1.1] | (RefSeq) katanin p60 ATPase-containing subunit A1-like (A)	--	katanin p60 ATPase-containing subunit A1-like [Chenopodium quinoa]	RecName: Full=Katanin p60 ATPase-containing subunit A1 {ECO:0000255|HAMAP-Rule:MF_03023}; Short=Katanin p60 subunit A1 {ECO:0000255|HAMAP-Rule:MF_03023}; EC=3.6.4.3 {ECO:0000255|HAMAP-Rule:MF_03023}; AltName: Full=CAD ATPase; AltName: Full=Katanin-1; Short=Atp60; AltName: Full=Protein BOTERO 1; AltName: Full=Protein ECTOPIC ROOT HAIR 3; AltName: Full=Protein FAT ROOT; AltName: Full=Protein FRAGIL…	SubName: Full=Uncharacterized protein {ECO:0000313|EMBL:KNA05072.1}; Flags: Fragment;	AAA+-type ATPase	GO:0008352,katanin complex; GO:0005874,microtubule; GO:0005634,nucleus; GO:0005524,ATP binding; GO:0008017,microtubule binding; GO:0008568,microtubule-severing ATPase activity; GO:0043622,cortical microtubule organization; GO:0000226,microtubule cytoskeleton organization; GO:0009825,multidimensional cell growth; GO:0009832,plant-type cell wall biogenesis; GO:0010091,trichome branching	PF00004.29:ATPase family associated with various cellular activities (AAA)
gene-LOC110687453	84.88	90.5	72.38	175.29	213.25	276.08	1309	1329	915	1691	3054	3732	1.53893	5.32255e-10	6.14089e-07	up	NW_018743919.1	3909322	3910070	+	LOC110687453	--	--	--	cysteine proteinase inhibitor 1-like [Chenopodium quinoa]	RecName: Full=Cysteine proteinase inhibitor 1 {ECO:0000303|PubMed:14697268}; Short=KCPI1 {ECO:0000303|PubMed:14697268}; AltName: Full=Phytocystatin {ECO:0000312|EMBL:AAR92223.1}; AltName: Allergen=Act d 4; Flags: Precursor;	RecName: Full=Cysteine proteinase inhibitor {ECO:0000256|RuleBase:RU362130};	--	GO:0005576,extracellular region; GO:0004869,cysteine-type endopeptidase inhibitor activity; GO:0006952,defense response	PF16845.5:Aspartic acid proteinase inhibitor
gene-LOC110687811	0.08	0.06	0	2.79	2.86	12.05	4	3	0	88	134	533	7.01785	7.58292e-10	8.44711e-07	up	NW_018743920.1	988126	990576	+	LOC110687811	--	--	--	uncharacterized protein LOC110687811 [Chenopodium quinoa]	--	SubName: Full=Uncharacterized protein {ECO:0000313|EMBL:KNA19229.1};	--	--	PF04720.12:PDDEXK-like family of unknown function
gene-LOC110687861	4.9	4.42	5	17.51	29.16	39.45	213	183	178	476	1177	1503	2.67395	9.25689e-12	2.13603e-08	up	NW_018743920.1	1849108	1851218	+	LOC110687861	--	K13415 protein brassinosteroid insensitive 1 [EC:2.7.10.1 2.7.11.1] | (RefSeq) systemin receptor SR160-like (A)	ko04075: Plant hormone signal transduction	leucine-rich repeat receptor-like serine/threonine/tyrosine-protein kinase SOBIR1 [Chenopodium quinoa]	RecName: Full=Leucine-rich repeat receptor-like serine/threonine/tyrosine-protein kinase SOBIR1; EC=2.7.10.1; EC=2.7.11.1; AltName: Full=Protein EVERSHED; AltName: Full=Protein SUPPRESSOR OF BIR1-1; Flags: Precursor;	SubName: Full=Uncharacterized protein {ECO:0000313|EMBL:KNA18669.1};	--	GO:0016021,integral component of membrane; GO:0005886,plasma membrane; GO:0005524,ATP binding; GO:0004674,protein serine/threonine kinase activity; GO:0004713,protein tyrosine kinase activity; GO:0004714,transmembrane receptor protein tyrosine kinase activity; GO:0006952,defense response; GO:0010942,positive regulation of cell death; GO:0031349,positive regulation of defense response	PF00069.25:Protein kinase domain
gene-LOC110688041	3.52	3.58	4.26	9.12	8.67	11.9	245	237	243	397	560	726	1.50029	3.39005e-05	0.00765844	up	NW_018743920.1	4335580	4344337	+	LOC110688041	--	K21797 phosphatidylinositol 4-phosphatase [EC:3.1.3.-] | (RefSeq) phosphoinositide phosphatase SAC7-like isoform X1 (A)	ko00562: Inositol phosphate metabolism; ko04070: Phosphatidylinositol signaling system	phosphoinositide phosphatase SAC2-like [Chenopodium quinoa]	RecName: Full=Phosphoinositide phosphatase SAC2; Short=AtSAC2; EC=3.1.3.-; AltName: Full=Phosphatidylinositol 3,5-bisphosphate 5-phosphatase SAC2; AltName: Full=Protein SUPPRESSOR OF ACTIN 2; AltName: Full=SAC domain protein 2;	SubName: Full=Uncharacterized protein {ECO:0000313|EMBL:KNA22662.1};	Putative phosphoinositide phosphatase	GO:0005774,vacuolar membrane; GO:0042578,phosphoric ester hydrolase activity; GO:0036092,phosphatidylinositol-3-phosphate biosynthetic process; GO:0007033,vacuole organization	PF02383.18:SacI homology domain
gene-LOC110688149	32.67	28.9	68.81	162.99	148.8	193.31	908	765	1568	2834	3841	4710	2.04561	6.71322e-05	0.0126618	up	NW_018743920.1	5876285	5877634	+	LOC110688149	--	K12581 CCR4-NOT transcription complex subunit 7/8 | (RefSeq) probable CCR4-associated factor 1 homolog 11 (A)	ko03018: RNA degradation	probable CCR4-associated factor 1 homolog 11 [Chenopodium quinoa]	RecName: Full=Probable CCR4-associated factor 1 homolog 11; EC=3.1.13.4;	SubName: Full=Uncharacterized protein {ECO:0000313|EMBL:KNA21205.1};	mRNA deadenylase subunit	GO:0030015,CCR4-NOT core complex; GO:0005634,nucleus; GO:0000932,P-body; GO:0008408,3'-5' exonuclease activity; GO:0046872,metal ion binding; GO:0004535,poly(A)-specific ribonuclease activity; GO:0003723,RNA binding; GO:0042742,defense response to bacterium; GO:0043928,exonucleolytic nuclear-transcribed mRNA catabolic process involved in deadenylation-dependent decay; GO:0017148,negative regulati…	PF04857.20:CAF1 family ribonuclease
gene-LOC110688164	4.93	4.49	3.08	10.11	8.15	17.37	258	224	132	331	396	797	1.63074	0.000405689	0.0409556	up	NW_018743920.1	6060490	6070054	+	LOC110688164	--	--	--	BEL1-like homeodomain protein 1 [Chenopodium quinoa]	RecName: Full=BEL1-like homeodomain protein 1; Short=BEL1-like protein 1; AltName: Full=Protein EMBRYO SAC DEVELOPMENT ARREST 29;	SubName: Full=Uncharacterized protein {ECO:0000313|EMBL:KNA25228.1};	Transcription factor MEIS1 and related HOX domain proteins	GO:0005737,cytoplasm; GO:0005634,nucleus; GO:0003677,DNA binding; GO:0003700,DNA-binding transcription factor activity; GO:0046982,protein heterodimerization activity; GO:0042803,protein homodimerization activity; GO:0010197,polar nucleus fusion; GO:0009737,response to abscisic acid; GO:0010201,response to continuous far red light stimulus by the high-irradiance response system; GO:0009610,respon…	PF07526.11:Associated with HOX
gene-LOC110688249	12.41	13.14	10.18	23.79	24.24	27.6	659	664	443	790	1195	1284	1.21672	3.74153e-06	0.00153	up	NW_018743920.1	6917316	6920476	-	LOC110688249	--	--	--	zinc finger CCCH domain-containing protein 66-like isoform X1 [Chenopodium quinoa]	RecName: Full=Zinc finger CCCH domain-containing protein 66; Short=AtC3H66;	SubName: Full=Uncharacterized protein {ECO:0000313|EMBL:KNA08716.1};	CCCH-type Zn-finger protein	GO:0003677,DNA binding; GO:0003700,DNA-binding transcription factor activity; GO:0046872,metal ion binding; GO:0006355,regulation of transcription, DNA-templated	PF00023.30:Ankyrin repeat
gene-LOC110688398	1.62	0.89	1.5	4.13	4.26	5.81	92	48	70	147	225	290	1.93668	0.000250497	0.0300829	up	NW_018743920.1	8202352	8205116	+	LOC110688398	--	K14494 DELLA protein | (RefSeq) DELLA protein GAI1-like (A)	ko04075: Plant hormone signal transduction	scarecrow-like protein 30 [Chenopodium quinoa]	RecName: Full=Scarecrow-like protein 33; Short=AtSCL33; AltName: Full=GRAS family protein 12; Short=AtGRAS-12;	SubName: Full=Uncharacterized protein {ECO:0000313|EMBL:KNA03676.1}; Flags: Fragment;	--	GO:0005634,nucleus; GO:0003700,DNA-binding transcription factor activity; GO:0043565,sequence-specific DNA binding; GO:0006355,regulation of transcription, DNA-templated; GO:0006351,transcription, DNA-templated	PF03514.14:GRAS domain family
gene-LOC110688458	468.04	521.07	253.87	106.11	41.95	28.96	5310	5629	2361	753	442	288	-2.56834	0.000151871	0.0219026	down	NW_018743920.1	8810098	8810705	-	LOC110688458	--	K11254 histone H4 | (RefSeq) histone H4 (A)	--	hypothetical protein SETIT_032292mg, partial [Setaria italica]	RecName: Full=Histone H4;	RecName: Full=Histone H4 {ECO:0000256|RuleBase:RU000528}; Flags: Fragment;	Histone H4	GO:0009507,chloroplast; GO:0005829,cytosol; GO:0000788,nuclear nucleosome; GO:0005730,nucleolus; GO:0005886,plasma membrane; GO:0009506,plasmodesma; GO:0009579,thylakoid; GO:0005774,vacuolar membrane; GO:0003677,DNA binding; GO:0042393,histone binding; GO:0046982,protein heterodimerization activity; GO:0006334,nucleosome assembly; GO:0009414,response to water deprivation	PF15511.6:Centromere kinetochore component CENP-T histone fold
gene-LOC110688494	3.47	4.34	3.05	8.98	8.22	9.39	178	212	128	288	391	422	1.43347	0.000141604	0.0208129	up	NW_018743920.1	9296761	9300224	+	LOC110688494	--	K21867 potassium channel | (RefSeq) potassium channel SKOR-like (A)	--	ankyrin repeat-containing protein At5g02620-like [Chenopodium quinoa]	RecName: Full=Ankyrin repeat-containing protein At5g02620;	SubName: Full=Uncharacterized protein {ECO:0000313|EMBL:KNA10284.1};	FOG: Ankyrin repeat	GO:0005783,endoplasmic reticulum; GO:0016021,integral component of membrane; GO:0005886,plasma membrane	PF12796.7:Ankyrin repeats (3 copies)
gene-LOC110688533	8.74	8.53	15.53	27.39	76.61	204.36	294	273	428	576	2392	6023	3.23822	9.16847e-06	0.00293658	up	NW_018742309.1	5293395	5299115	-	LOC110688533	--	K00499 choline monooxygenase [EC:1.14.15.7] | (RefSeq) choline monooxygenase, chloroplastic-like (A)	ko00260: Glycine, serine and threonine metabolism	choline monooxygenase, chloroplastic-like [Chenopodium quinoa]	RecName: Full=Choline monooxygenase, chloroplastic; EC=1.14.15.7; Flags: Precursor;	SubName: Full=Choline monooxygenase {ECO:0000313|EMBL:AFG28558.1};	--	GO:0009570,chloroplast stroma; GO:0051537,2 iron, 2 sulfur cluster binding; GO:0019133,choline monooxygenase activity; GO:0005506,iron ion binding; GO:0016708,oxidoreductase activity, acting on paired donors, with incorporation or reduction of molecular oxygen, NAD(P)H as one donor, and incorporation of two atoms of oxygen into one donor; GO:0019439,aromatic compound catabolic process; GO:0019285…	PF00848.19:Ring hydroxylating alpha subunit (catalytic domain)
gene-LOC110688986	6.45	5.26	3.36	0.84	0.96	1.26	281	218	120	23	39	48	-2.16476	7.92811e-05	0.0143886	down	NW_018743946.1	2386248	2388751	-	LOC110688986	--	K09422 transcription factor MYB, plant | (RefSeq) transcription factor MYB106-like (A)	--	transcription factor MYB106-like [Chenopodium quinoa]	RecName: Full=Transcription factor MYB106 {ECO:0000305}; AltName: Full=Myb-related protein 106 {ECO:0000303|PubMed:11597504}; Short=AtMYB106 {ECO:0000303|PubMed:11597504}; AltName: Full=Transcription factor NOEK {ECO:0000303|PubMed:18805951};	SubName: Full=Uncharacterized protein {ECO:0000313|EMBL:KNA05795.1};	Transcription factor, Myb superfamily	GO:0005634,nucleus; GO:0003677,DNA binding; GO:0000902,cell morphogenesis; GO:0035017,cuticle pattern formation; GO:1901957,regulation of cutin biosynthetic process; GO:0006355,regulation of transcription, DNA-templated; GO:0006351,transcription, DNA-templated; GO:0010091,trichome branching	PF00249.31:Myb-like DNA-binding domain
gene-LOC110689325	6.73	4.97	17.91	44.88	49.55	75.62	182	128	397	759	1244	1792	2.57812	8.25042e-05	0.0146172	up	NW_018743955.1	6960885	6962197	+	LOC110689325	--	K20604 mitogen-activated protein kinase kinase 9 [EC:2.7.12.2] | (RefSeq) mitogen-activated protein kinase kinase 9-like (A)	ko04016: MAPK signaling pathway - plant	mitogen-activated protein kinase kinase 9-like [Chenopodium quinoa]	RecName: Full=Mitogen-activated protein kinase kinase 9; Short=AtMKK9; Short=MAP kinase kinase 9; EC=2.7.12.2;	SubName: Full=Uncharacterized protein {ECO:0000313|EMBL:KNA17854.1};	Mitogen-activated protein kinase kinase (MAP2K)	GO:0005737,cytoplasm; GO:0005634,nucleus; GO:0005524,ATP binding; GO:0004708,MAP kinase kinase activity; GO:0030295,protein kinase activator activity; GO:0004674,protein serine/threonine kinase activity; GO:0010120,camalexin biosynthetic process; GO:0009693,ethylene biosynthetic process; GO:0009873,ethylene-activated signaling pathway; GO:0010150,leaf senescence; GO:0045893,positive regulation of…	PF00069.25:Protein kinase domain
gene-LOC110689420	7.58	9.4	6.94	13.6	16.58	22.97	328	387	246	368	666	871	1.26408	0.000170655	0.0236609	up	NW_018743955.1	8093720	8099024	-	LOC110689420	--	K06694 26S proteasome non-ATPase regulatory subunit 10 | (RefSeq) 26S proteasome non-ATPase regulatory subunit 10-like (A)	--	putative E3 ubiquitin-protein ligase XBAT35 isoform X1 [Chenopodium quinoa]	RecName: Full=Putative E3 ubiquitin-protein ligase XBAT35; EC=2.3.2.27; AltName: Full=Ankyrin repeat domain and RING finger-containing protein XBAT35; AltName: Full=Protein XB3 homolog 5; AltName: Full=RING-type E3 ubiquitin transferase XBAT35;	SubName: Full=Uncharacterized protein {ECO:0000313|EMBL:KNA21079.1};	--	GO:0005737,cytoplasm; GO:0005634,nucleus; GO:0000151,ubiquitin ligase complex; GO:0046872,metal ion binding; GO:0031625,ubiquitin protein ligase binding; GO:0004842,ubiquitin-protein transferase activity	PF13920.6:Zinc finger, C3HC4 type (RING finger)
gene-LOC110689437	1.11	0.94	3.3	10.78	11.94	23.12	51	41	124	309	508	929	3.14112	1.61693e-05	0.00446453	up	NW_018743955.1	8256564	8261016	-	LOC110689437	--	K08176 MFS transporter, PHS family, inorganic phosphate transporter | (RefSeq) probable inorganic phosphate transporter 1-4 (A)	--	probable inorganic phosphate transporter 1-4 [Chenopodium quinoa]	RecName: Full=Probable inorganic phosphate transporter 1-4; Short=OsPT4; Short=OsPht1;4; AltName: Full=H(+)/Pi cotransporter; AltName: Full=OsPT1;	SubName: Full=Uncharacterized protein {ECO:0000313|EMBL:KNA12764.1};	Inorganic phosphate transporter	GO:0005887,integral component of plasma membrane; GO:0005315,inorganic phosphate transmembrane transporter activity; GO:0015293,symporter activity; GO:0006817,phosphate ion transport	PF00083.24:Sugar (and other) transporter
gene-LOC110689626	0.94	1.03	1.69	5.23	7.55	11.75	42	44	62	146	313	460	2.81073	1.40833e-06	0.000649947	up	NW_018743975.1	295660	297828	+	LOC110689626	--	--	--	--	--	--	--	--	--
gene-LOC110689821	7.17	7.29	5.85	11.18	13.94	16.27	284	275	190	277	513	565	1.1477	0.000199275	0.0256377	up	NW_018743977.1	3812839	3817280	+	LOC110689821	--	--	--	--	--	--	--	--	--
gene-LOC110690041	13.26	13.49	11.36	30.46	27.45	43.92	981	950	689	1409	1885	2847	1.53878	2.3249e-07	0.000147612	up	NW_018743979.1	4182449	4219617	+	LOC110690041	--	K01006 pyruvate, orthophosphate dikinase [EC:2.7.9.1] | (RefSeq) pyruvate, phosphate dikinase, chloroplastic-like (A)	ko00010: Glycolysis / Gluconeogenesis; ko00620: Pyruvate metabolism; ko00710: Carbon fixation in photosynthetic organisms; ko01200: Carbon metabolism	pyruvate, phosphate dikinase, chloroplastic-like [Chenopodium quinoa]	RecName: Full=Pyruvate, phosphate dikinase, chloroplastic; EC=2.7.9.1 {ECO:0000250|UniProtKB:P11155}; AltName: Full=Pyruvate, orthophosphate dikinase; Flags: Precursor;	RecName: Full=Pyruvate, phosphate dikinase {ECO:0000256|PIRNR:PIRNR000853}; EC=2.7.9.1 {ECO:0000256|PIRNR:PIRNR000853};	--	GO:0009507,chloroplast; GO:0005524,ATP binding; GO:0016301,kinase activity; GO:0046872,metal ion binding; GO:0050242,pyruvate, phosphate dikinase activity; GO:0015979,photosynthesis; GO:0006090,pyruvate metabolic process	PF02896.18:PEP-utilising enzyme, TIM barrel domain
gene-LOC110690443	2.97	2.37	0.79	5.78	12.05	17.34	216	164	47	263	814	1106	2.63067	5.15292e-05	0.0103394	up	NW_018744041.1	1240746	1251045	-	LOC110690443	--	K01176 alpha-amylase [EC:3.2.1.1] | (RefSeq) alpha-amylase 3, chloroplastic-like (A)	ko00500: Starch and sucrose metabolism	alpha-amylase 3, chloroplastic-like [Chenopodium quinoa]	RecName: Full=Alpha-amylase 3, chloroplastic {ECO:0000303|PubMed:15637061}; Short=AtAMY3 {ECO:0000303|PubMed:15637061}; EC=3.2.1.1 {ECO:0000269|PubMed:24089528}; AltName: Full=1,4-alpha-D-glucan glucanohydrolase; Flags: Precursor;	SubName: Full=Uncharacterized protein {ECO:0000313|EMBL:KNA25529.1};	Alpha-amylase	GO:0009507,chloroplast; GO:0009570,chloroplast stroma; GO:0004556,alpha-amylase activity; GO:0103025,alpha-amylase activity (releasing maltohexaose); GO:0005509,calcium ion binding; GO:0005983,starch catabolic process	PF07821.12:Alpha-amylase C-terminal beta-sheet domain
gene-LOC110690623	58.09	57.42	54.27	15.35	3.93	4.02	2293	2158	1756	379	144	139	-2.63196	0.000311262	0.0342018	down	NW_018744052.1	275788	282761	+	LOC110690623	--	--	--	uncharacterized protein LOC110690623 [Chenopodium quinoa]	--	SubName: Full=Uncharacterized protein {ECO:0000313|EMBL:KNA19776.1};	--	--	--
gene-LOC110690718	9.71	8.54	8.73	20.03	19.79	30.38	327	274	241	422	619	897	1.49307	9.41955e-06	0.00295436	up	NW_018744062.1	1489797	1492644	-	LOC110690718	--	K13459 disease resistance protein RPS2 | (RefSeq) disease resistance protein At4g27190-like isoform X1 (A)	ko04626: Plant-pathogen interaction	probable WRKY transcription factor 30 [Chenopodium quinoa]	RecName: Full=Probable WRKY transcription factor 70; AltName: Full=WRKY DNA-binding protein 70;	SubName: Full=Uncharacterized protein {ECO:0000313|EMBL:KNA05388.1};	--	GO:0005634,nucleus; GO:0003700,DNA-binding transcription factor activity; GO:0043565,sequence-specific DNA binding; GO:0042742,defense response to bacterium; GO:0050832,defense response to fungus; GO:0009864,induced systemic resistance, jasmonic acid mediated signaling pathway; GO:1900056,negative regulation of leaf senescence; GO:0045892,negative regulation of transcription, DNA-templated; GO:00…	PF03106.15:WRKY DNA -binding domain
gene-LOC110690755	11.8	9.72	9.91	1.21	2.45	1.47	311	244	214	20	60	34	-2.48782	5.37554e-06	0.00199606	down	NW_018744062.1	1918707	1921517	+	LOC110690755	--	K07760 cyclin-dependent kinase [EC:2.7.11.22] | (RefSeq) cell division control protein 2 homolog C-like (A)	--	cell division control protein 2 homolog C-like [Chenopodium quinoa]	RecName: Full=Cyclin-dependent kinase B1-2; Short=CDKB1;2; EC=2.7.11.22; EC=2.7.11.23;	SubName: Full=Uncharacterized protein {ECO:0000313|EMBL:KNA11349.1};	Protein kinase PCTAIRE and related kinases	GO:0000307,cyclin-dependent protein kinase holoenzyme complex; GO:0005737,cytoplasm; GO:0005634,nucleus; GO:0005524,ATP binding; GO:0004693,cyclin-dependent protein serine/threonine kinase activity; GO:0004674,protein serine/threonine kinase activity; GO:0008353,RNA polymerase II CTD heptapeptide repeat kinase activity; GO:0000082,G1/S transition of mitotic cell cycle; GO:0010444,guard mother cel…	PF00069.25:Protein kinase domain
gene-LOC110690912	0.09	0.03	0	1.44	2.16	2.02	3	1	0	30	67	59	5.63585	3.45315e-05	0.0076693	up	NW_018744066.1	1171784	1173731	+	LOC110690912	--	K01183 chitinase [EC:3.2.1.14] | (RefSeq) acidic mammalian chitinase-like (A)	ko00520: Amino sugar and nucleotide sugar metabolism	acidic mammalian chitinase-like [Chenopodium quinoa]	RecName: Full=Class V chitinase {ECO:0000303|PubMed:22936594}; Short=AtChiC {ECO:0000303|PubMed:22936594}; EC=3.2.1.14 {ECO:0000269|PubMed:21390509, ECO:0000269|PubMed:22936594}; Flags: Precursor;	SubName: Full=Uncharacterized protein {ECO:0000313|EMBL:KNA14195.1};	Chitinase	GO:0005618,cell wall; GO:0005576,extracellular region; GO:0008061,chitin binding; GO:0004568,chitinase activity; GO:0008843,endochitinase activity; GO:0035885,exochitinase activity; GO:0005975,carbohydrate metabolic process; GO:0006032,chitin catabolic process; GO:0009737,response to abscisic acid; GO:0009753,response to jasmonic acid; GO:0009651,response to salt stress	PF00704.28:Glycosyl hydrolases family 18
gene-LOC110691041	0.21	0.12	0	3.12	3.57	6.04	7	4	0	66	112	179	5.3791	1.0821e-06	0.000529654	up	NW_018744066.1	2924935	2926575	-	LOC110691041	--	K22683 aspartyl protease family protein [EC:3.4.23.-] | (RefSeq) aspartyl protease family protein 2-like (A)	--	basic 7S globulin-like [Chenopodium quinoa]	RecName: Full=Basic 7S globulin 2; AltName: Full=SBg7S; Short=Bg; Contains: RecName: Full=Basic 7S globulin 2 high kDa subunit; Contains: RecName: Full=Basic 7S globulin 2 low kDa subunit; Flags: Precursor;	SubName: Full=Uncharacterized protein {ECO:0000313|EMBL:KNA22753.1};	Aspartyl protease	GO:0004190,aspartic-type endopeptidase activity; GO:0045735,nutrient reservoir activity; GO:0030163,protein catabolic process; GO:0006508,proteolysis	PF14541.6:Xylanase inhibitor C-terminal
gene-LOC110691110	0.03	0	0	3.4	0.96	2.31	1	0	0	62	26	59	7.55805	3.02111e-05	0.0069712	up	NW_018744066.1	1378043	1381682	+	LOC110691110	--	K18327 RNA exonuclease 4 [EC:3.1.-.-] | (RefSeq) RNA exonuclease 4-like (A)	--	apoptosis-enhancing nuclease-like [Chenopodium quinoa]	RecName: Full=Small RNA degrading nuclease 1; EC=3.1.-.-;	SubName: Full=RNA exonuclease 4-like {ECO:0000313|RefSeq:XP_010251266.1};	3'-5' exonuclease	GO:0005634,nucleus; GO:0008408,3'-5' exonuclease activity; GO:0003676,nucleic acid binding; GO:0010587,miRNA catabolic process	PF00929.24:Exonuclease
gene-LOC110691264	11.6	11.16	4.36	13.3	61.42	80.49	393	360	121	282	1933	2391	2.59702	0.000255918	0.0302836	up	NW_018744072.1	2650862	2652507	-	LOC110691264	--	K09287 RAV-like factor | (RefSeq) AP2/ERF and B3 domain-containing transcription factor RAV1-like (A)	--	AP2/ERF and B3 domain-containing transcription factor RAV1-like [Chenopodium quinoa]	RecName: Full=AP2/ERF and B3 domain-containing transcription factor RAV1; AltName: Full=Ethylene-responsive transcription factor RAV1; AltName: Full=Protein RELATED TO ABI3/VP1 1;	SubName: Full=Uncharacterized protein {ECO:0000313|EMBL:KNA10884.1};	--	GO:0005634,nucleus; GO:0003677,DNA binding; GO:0003700,DNA-binding transcription factor activity; GO:0009873,ethylene-activated signaling pathway; GO:0048527,lateral root development; GO:0048366,leaf development; GO:0009910,negative regulation of flower development; GO:0045892,negative regulation of transcription, DNA-templated; GO:0009741,response to brassinosteroid; GO:0006351,transcription, DN…	PF02362.21:B3 DNA binding domain
gene-LOC110691948	10.41	10.35	10.5	20.09	20.52	25.78	473	448	391	571	866	1027	1.20752	1.86137e-05	0.00496956	up	NW_018744092.1	4232416	4239155	+	LOC110691948	--	K17839 polyamine oxidase [EC:1.5.3.17 1.5.3.-] | (RefSeq) probable polyamine oxidase 2 (A)	ko00330: Arginine and proline metabolism; ko00410: beta-Alanine metabolism; ko00770: Pantothenate and CoA biosynthesis	probable polyamine oxidase 2 [Chenopodium quinoa]	RecName: Full=Probable polyamine oxidase 2; Short=AtPAO2; EC=1.5.3.-; AltName: Full=Amine oxidase 1;	SubName: Full=Uncharacterized protein {ECO:0000313|EMBL:KNA10574.1};	Amine oxidase	GO:0005777,peroxisome; GO:0046592,polyamine oxidase activity; GO:0006598,polyamine catabolic process	PF01593.24:Flavin containing amine oxidoreductase
gene-LOC110692174	6.01	8.36	5.67	1.35	1.68	2.11	185	245	143	26	48	57	-1.84231	0.00031835	0.0343957	down	NW_018744093.1	4013726	4019183	-	LOC110692174	--	K02180 cell cycle arrest protein BUB3 | (RefSeq) mitotic checkpoint protein BUB3.2 (A)	--	mitotic checkpoint protein BUB3.2 [Chenopodium quinoa]	RecName: Full=Mitotic checkpoint protein BUB3.2; AltName: Full=Protein BUDDING UNINHIBITED BY BENZYMIDAZOL 3.2;	SubName: Full=Uncharacterized protein {ECO:0000313|EMBL:KNA06706.1};	Mitotic spindle checkpoint protein BUB3, WD repeat superfamily	GO:1990298,bub1-bub3 complex; GO:0000777,condensed chromosome kinetochore; GO:0000776,kinetochore; GO:0033597,mitotic checkpoint complex; GO:0009524,phragmoplast; GO:0005819,spindle; GO:0043130,ubiquitin binding; GO:0051301,cell division; GO:0007059,chromosome segregation; GO:0051321,meiotic cell cycle; GO:0007094,mitotic spindle assembly checkpoint	PF00400.32:WD domain, G-beta repeat
gene-LOC110692935	23.11	24.29	19.2	47.23	55	67.29	1125	1126	766	1438	2486	2871	1.46973	3.54625e-10	4.58247e-07	up	NW_018744137.1	387075	391657	-	LOC110692935	--	--	--	NAC domain-containing protein 14-like [Chenopodium quinoa]	RecName: Full=Protein NTM1-like 9 {ECO:0000303|PubMed:17158162}; AltName: Full=Calmodulin-binding NAC protein {ECO:0000303|PubMed:17947243};	SubName: Full=Uncharacterized protein {ECO:0000313|EMBL:KNA23598.1};	--	GO:0005789,endoplasmic reticulum membrane; GO:0016021,integral component of membrane; GO:0005634,nucleus; GO:0005886,plasma membrane; GO:0005516,calmodulin binding; GO:0003700,DNA-binding transcription factor activity; GO:0044212,transcription regulatory region DNA binding; GO:0071470,cellular response to osmotic stress; GO:0045892,negative regulation of transcription, DNA-templated; GO:1900426,p…	PF02365.15:No apical meristem (NAM) protein
gene-LOC110692956	5.11	8.24	3.19	29.08	29.7	50.12	86	132	44	306	464	739	2.8451	6.61272e-08	4.644e-05	up	NW_018744137.1	535367	536279	-	LOC110692956	--	--	--	--	--	--	--	--	--
gene-LOC110693056	24.6	21.04	22.85	32.55	41.08	54.35	1719	1400	1309	1423	2666	3329	1.00653	0.000280619	0.0318134	up	NW_018744137.1	1534970	1542262	+	LOC110693056	--	K19036 ATP-dependent RNA/DNA helicase IGHMBP2 [EC:3.6.4.12 3.6.4.13] | (RefSeq) DNA-binding protein SMUBP-2-like (A)	--	DNA-binding protein SMUBP-2-like [Chenopodium quinoa]	RecName: Full=Regulator of nonsense transcripts 1 homolog; EC=3.6.4.-; AltName: Full=ATP-dependent helicase UPF1;	SubName: Full=Uncharacterized protein {ECO:0000313|EMBL:KNA13086.1};	DNA helicase	GO:0005737,cytoplasm; GO:0005829,cytosol; GO:0000932,P-body; GO:0005886,plasma membrane; GO:0009506,plasmodesma; GO:0005524,ATP binding; GO:0003677,DNA binding; GO:0004386,helicase activity; GO:0003729,mRNA binding; GO:0008270,zinc ion binding; GO:0042742,defense response to bacterium; GO:0009867,jasmonic acid mediated signaling pathway; GO:0048571,long-day photoperiodism; GO:0000184,nuclear-tran…	PF13087.6:AAA domain
gene-LOC110693236	62.24	59.01	59.57	16.36	22.05	26.09	1429	1290	1121	235	470	525	-1.37843	7.48483e-07	0.000385508	down	NW_018744143.1	2012347	2014975	+	LOC110693236	--	--	--	uncharacterized protein LOC110693236 [Chenopodium quinoa]	--	SubName: Full=Uncharacterized protein {ECO:0000313|EMBL:EMJ13323.1};	--	GO:0016021,integral component of membrane	PF06749.12:Protein of unknown function (DUF1218)
gene-LOC110693243	8.09	9.78	3.19	45.51	19.38	29.31	204	235	66	718	454	648	2.36826	0.000280815	0.0318134	up	NW_018744143.1	2123251	2127493	-	LOC110693243	--	K01953 asparagine synthase (glutamine-hydrolysing) [EC:6.3.5.4] | (RefSeq) asparagine synthetase [glutamine-hydrolyzing] 1-like (A)	ko00250: Alanine, aspartate and glutamate metabolism; ko01230: Biosynthesis of amino acids	stem-specific protein TSJT1-like [Chenopodium quinoa]	RecName: Full=Stem-specific protein TSJT1;	SubName: Full=Stem-specific protein TSJT1 {ECO:0000313|EMBL:ALU58321.1};	--	--	PF12481.8:Aluminium induced protein
gene-LOC110693596	35.66	30.88	24.36	77.3	68.79	196.68	843	695	472	1143	1510	4075	2.00554	4.57348e-05	0.00953201	up	NW_018744151.1	2914513	2916326	-	LOC110693596	--	--	--	stem-specific protein TSJT1-like [Chenopodium quinoa]	RecName: Full=Stem-specific protein TSJT1;	SubName: Full=Uncharacterized protein {ECO:0000313|EMBL:KNA18212.1};	--	--	PF12481.8:Aluminium induced protein
gene-LOC110693654	36.56	34.16	31.05	88.89	93.51	111.25	1044	929	727	1588	2480	2785	1.65599	4.97391e-13	2.08958e-09	up	NW_018744151.1	3936995	3938381	-	LOC110693654	--	K09286 EREBP-like factor | (RefSeq) ethylene-responsive transcription factor 4-like (A)	--	ethylene-responsive transcription factor 4-like [Chenopodium quinoa]	RecName: Full=Ethylene-responsive transcription factor 4; AltName: Full=Ethylene-responsive element-binding factor 3; Short=EREBP-3; AltName: Full=Ethylene-responsive element-binding factor 4 homolog; AltName: Full=NsERF3;	SubName: Full=Uncharacterized protein {ECO:0000313|EMBL:KNA13889.1};	--	GO:0005634,nucleus; GO:0003677,DNA binding; GO:0003700,DNA-binding transcription factor activity; GO:0006952,defense response; GO:0009873,ethylene-activated signaling pathway; GO:0006351,transcription, DNA-templated	PF00847.20:AP2 domain
gene-LOC110693660	0.66	0.34	1.64	7.41	6.11	12.02	35	17	71	245	300	557	3.33793	2.38347e-05	0.00574611	up	NW_018744151.1	4096508	4103257	+	LOC110693660	--	--	--	MACPF domain-containing protein NSL1-like isoform X1 [Chenopodium quinoa]	RecName: Full=MACPF domain-containing protein NSL1; AltName: Full=Protein NECROTIC SPOTTED LESIONS 1; Short=Protein NSL1;	SubName: Full=Uncharacterized protein {ECO:0000313|EMBL:KNA24180.1};	--	GO:0008219,cell death; GO:0052542,defense response by callose deposition; GO:0006955,immune response; GO:0009626,plant-type hypersensitive response; GO:0010337,regulation of salicylic acid metabolic process; GO:0009651,response to salt stress	PF01823.19:MAC/Perforin domain
gene-LOC110694120	0.16	0.25	0	2.54	3.02	5.81	6	9	0	59	104	189	4.89232	2.85798e-05	0.00669858	up	NW_018744239.1	2078610	2080410	-	LOC110694120	--	K22683 aspartyl protease family protein [EC:3.4.23.-] | (RefSeq) aspartyl protease family protein 2-like (A)	--	aspartic proteinase CDR1-like [Chenopodium quinoa]	RecName: Full=Aspartic proteinase CDR1; EC=3.4.23.-; AltName: Full=Protein CONSTITUTIVE DISEASE RESISTANCE 1; Flags: Precursor;	SubName: Full=Uncharacterized protein {ECO:0000313|EMBL:KNA06676.1};	Aspartyl protease	GO:0048046,apoplast; GO:0004190,aspartic-type endopeptidase activity; GO:0042742,defense response to bacterium; GO:0030163,protein catabolic process; GO:0010310,regulation of hydrogen peroxide metabolic process; GO:0010337,regulation of salicylic acid metabolic process	PF14543.6:Xylanase inhibitor N-terminal
gene-LOC110694671	6.64	8.68	18.42	53.02	72.57	116.02	237	295	539	1184	2406	3631	2.89106	6.05462e-07	0.000331516	up	NW_018744240.1	462569	465650	+	LOC110694671	--	K18696 glycerophosphodiester phosphodiesterase [EC:3.1.4.46] | (RefSeq) glycerophosphodiester phosphodiesterase GDPD1, chloroplastic-like (A)	ko00564: Glycerophospholipid metabolism	glycerophosphodiester phosphodiesterase GDPD1, chloroplastic-like [Chenopodium quinoa]	RecName: Full=Glycerophosphodiester phosphodiesterase GDPD1, chloroplastic {ECO:0000305}; EC=3.1.4.46 {ECO:0000269|PubMed:21323773}; AltName: Full=Glycerophosphodiester phosphodiesterase 1 {ECO:0000303|PubMed:21323773}; Short=AtGDPD1 {ECO:0000303|PubMed:21323773}; AltName: Full=Protein SENESCENCE-RELATED GENE 3 {ECO:0000303|PubMed:8883383}; Flags: Precursor;	SubName: Full=Uncharacterized protein {ECO:0000313|EMBL:KNA07255.1}; Flags: Fragment;	Predicted starch-binding protein	GO:0009507,chloroplast; GO:0009536,plastid; GO:0008889,glycerophosphodiester phosphodiesterase activity; GO:0000287,magnesium ion binding; GO:0030643,cellular phosphate ion homeostasis; GO:0006071,glycerol metabolic process; GO:0046475,glycerophospholipid catabolic process	PF03009.17:Glycerophosphoryl diester phosphodiesterase family
gene-LOC110695085	12.75	12.73	13.96	25.76	23.17	31.75	527	501	473	666	889	1150	1.15327	0.000277566	0.0318134	up	NW_018744290.1	644777	649008	-	LOC110695085	--	--	--	uncharacterized protein LOC110695085 isoform X1 [Chenopodium quinoa]	--	SubName: Full=Uncharacterized protein {ECO:0000313|EMBL:KNA18353.1};	--	GO:0004222,metalloendopeptidase activity; GO:0071586,CAAX-box protein processing	PF01435.18:Peptidase family M48
gene-LOC110695150	1	0.55	0	7.69	10.05	18.01	25	13	0	120	233	394	4.66374	8.84106e-05	0.0152733	up	NW_018744290.1	1245842	1247053	+	LOC110695150	--	--	--	uncharacterized protein LOC110695150 [Chenopodium quinoa]	--	SubName: Full=Uncharacterized protein {ECO:0000313|EMBL:KNA20593.1};	--	GO:0016021,integral component of membrane	--
gene-LOC110695254	7.9	7.11	5.98	12.06	15.55	16.25	245	210	152	234	448	442	1.18849	0.000304429	0.0337959	up	NW_018744290.1	2323682	2325794	-	LOC110695254	--	K05894 12-oxophytodienoic acid reductase [EC:1.3.1.42] | (RefSeq) 12-oxophytodienoate reductase 3-like (A)	ko00592: alpha-Linolenic acid metabolism	12-oxophytodienoate reductase 3-like [Chenopodium quinoa]	RecName: Full=12-oxophytodienoate reductase 3; EC=1.3.1.42; AltName: Full=12-oxophytodienoate-10,11-reductase 3; Short=OPDA-reductase 3; AltName: Full=LeOPR3;	SubName: Full=Uncharacterized protein {ECO:0000313|EMBL:KNA04621.1};	NADH:flavin oxidoreductase/12-oxophytodienoate reductase	GO:0005622,intracellular; GO:0005777,peroxisome; GO:0016629,12-oxophytodienoate reductase activity; GO:0010181,FMN binding; GO:0042802,identical protein binding; GO:0009695,jasmonic acid biosynthetic process; GO:0055114,oxidation-reduction process; GO:0031408,oxylipin biosynthetic process	PF00724.20:NADH:flavin oxidoreductase / NADH oxidase family
gene-LOC110695656	1	1.2	1.19	8.46	3.47	8.04	200	229	196	1060	645	1412	2.70404	3.11271e-07	0.000182357	up	NW_018744304.1	3987180	4003777	-	LOC110695656	--	K20478 golgin subfamily B member 1 | (RefSeq) uncharacterized protein PF11_0213 isoform X1 (A)	--	uncharacterized protein PF11_0213 isoform X1 [Chenopodium quinoa]	--	SubName: Full=Uncharacterized protein {ECO:0000313|EMBL:KNA17214.1};	--	--	--
gene-LOC110695918	101.4	103.67	36.05	7.24	11	11.24	1925	1874	561	86	194	187	-2.88913	2.02201e-08	1.5932e-05	down	NW_018744311.1	400369	401807	-	LOC110695918	--	--	--	protein YLS3-like [Chenopodium quinoa]	RecName: Full=Protein YLS3; AltName: Full=Protein YELLOW-LEAF-SPECIFIC GENE 3; AltName: Full=Xylogen-like protein 9; Short=AtXYLP9; Flags: Precursor;	SubName: Full=Uncharacterized protein {ECO:0000313|EMBL:KNA24321.1};	--	GO:0031225,anchored component of membrane; GO:0005886,plasma membrane; GO:0008289,lipid binding; GO:0006869,lipid transport	PF14368.6:Probable lipid transfer
gene-LOC110695965	22.3	27.03	19.69	4.12	5.91	5.23	467	539	338	54	115	96	-2.04833	1.00008e-07	6.87393e-05	down	NW_018742359.1	1422950	1452127	-	LOC110695965	--	--	--	uncharacterized protein LOC110695965 [Chenopodium quinoa]	--	SubName: Full=Uncharacterized protein {ECO:0000313|EMBL:KNA21855.1};	--	--	PF04108.12:Autophagy protein Apg17
gene-LOC110696030	15.6	16.83	21.39	36.68	36.74	51.03	773	794	869	1137	1691	2217	1.31465	0.000134649	0.0204218	up	NW_018744311.1	1655593	1660797	+	LOC110696030	--	--	--	protein DETOXIFICATION 42-like [Chenopodium quinoa]	RecName: Full=Protein DETOXIFICATION 42 {ECO:0000303|PubMed:11739388}; Short=AtDTX42 {ECO:0000303|PubMed:11739388}; AltName: Full=Aluminum-activated citrate transporter {ECO:0000303|PubMed:18826429}; AltName: Full=AtMATE {ECO:0000303|PubMed:18826429}; AltName: Full=FRD-like protein {ECO:0000303|PubMed:12172022}; AltName: Full=Multidrug and toxic compound extrusion protein 42 {ECO:0000305}; Short=…	RecName: Full=Protein DETOXIFICATION {ECO:0000256|RuleBase:RU004914}; AltName: Full=Multidrug and toxic compound extrusion protein {ECO:0000256|RuleBase:RU004914};	Uncharacterized membrane protein, predicted efflux pump	GO:0016021,integral component of membrane; GO:0005886,plasma membrane; GO:0015297,antiporter activity; GO:0015137,citrate transmembrane transporter activity; GO:0015238,drug transmembrane transporter activity; GO:0015746,citrate transport; GO:0010044,response to aluminum ion	PF01554.18:MatE
gene-LOC110696274	0.36	0.32	0	4.97	4.13	4.23	12	10	0	103	127	123	4.48378	0.000138696	0.0208004	up	NW_018744348.1	91977	94793	-	LOC110696274	--	K17609 nucleoredoxin [EC:1.8.1.8] | (RefSeq) probable nucleoredoxin 3 (A)	--	probable nucleoredoxin 3 [Chenopodium quinoa]	RecName: Full=Probable nucleoredoxin 3; Short=AtNrx3; EC=1.8.1.8;	SubName: Full=Uncharacterized protein {ECO:0000313|EMBL:KNA16880.1};	Thioredoxin, nucleoredoxin and related proteins	GO:0005737,cytoplasm; GO:0047134,protein-disulfide reductase activity; GO:0004791,thioredoxin-disulfide reductase activity; GO:0045454,cell redox homeostasis	PF13905.6:Thioredoxin-like
gene-LOC110696649	50.2	50.69	53.7	81.78	124.44	141.36	4650	4471	4078	4739	10705	11478	1.26776	4.30624e-06	0.00171745	up	NW_018744367.1	9327766	9333701	+	LOC110696649	--	K07198 5'-AMP-activated protein kinase, catalytic alpha subunit [EC:2.7.11.11] | (RefSeq) CBL-interacting serine/threonine-protein kinase 20-like (A)	--	CBL-interacting serine/threonine-protein kinase 6-like [Chenopodium quinoa]	RecName: Full=CBL-interacting serine/threonine-protein kinase 6; EC=2.7.11.1; AltName: Full=SNF1-related kinase 3.14; AltName: Full=SOS2-like protein kinase PKS4; AltName: Full=SOS3-interacting protein 3;	RecName: Full=Non-specific serine/threonine protein kinase {ECO:0000256|SAAS:SAAS00351747}; EC=2.7.11.1 {ECO:0000256|SAAS:SAAS00351747};	Serine/threonine protein kinase	GO:0005783,endoplasmic reticulum; GO:0005622,intracellular; GO:0005524,ATP binding; GO:0004674,protein serine/threonine kinase activity; GO:0010540,basipetal auxin transport; GO:0042538,hyperosmotic salinity response; GO:0035556,intracellular signal transduction; GO:0007275,multicellular organism development; GO:0018105,peptidyl-serine phosphorylation; GO:0018107,peptidyl-threonine phosphorylatio…	PF00069.25:Protein kinase domain
gene-LOC110697163	0	0	0	0	38.89	17.94	0	0	0	0	496	216	10.3991	0.000107239	0.0175856	up	NW_018744460.1	1559523	1565323	-	LOC110697163	--	K23882 CDGSH iron-sulfur domain-containing protein 2 | (RefSeq) CDGSH iron-sulfur domain-containing protein NEET-like (A)	--	CDGSH iron-sulfur domain-containing protein NEET-like [Chenopodium quinoa]	RecName: Full=CDGSH iron-sulfur domain-containing protein NEET; Short=At-NEET;	SubName: Full=Uncharacterized protein {ECO:0000313|EMBL:KMS98949.1};	CDGSH-type Zn-finger containing protein	GO:0009507,chloroplast; GO:0009570,chloroplast stroma; GO:0005739,mitochondrion; GO:0051537,2 iron, 2 sulfur cluster binding; GO:0046872,metal ion binding; GO:0055072,iron ion homeostasis; GO:0010150,leaf senescence; GO:0072593,reactive oxygen species metabolic process	PF09360.10:Iron-binding zinc finger CDGSH type
gene-LOC110697211	31	34.8	40.13	10.17	13.39	16.57	653	698	693	134	262	306	-1.30127	0.000387344	0.0393495	down	NW_018744460.1	2050788	2054798	+	LOC110697211	--	K07953 GTP-binding protein SAR1 [EC:3.6.5.-] | (RefSeq) GTP-binding protein SAR1A-like (A)	ko04141: Protein processing in endoplasmic reticulum	GTP-binding protein SAR1A-like [Chenopodium quinoa]	RecName: Full=GTP-binding protein SAR1A;	SubName: Full=Uncharacterized protein {ECO:0000313|EMBL:KNA15841.1};	Vesicle coat complex COPII, GTPase subunit SAR1	GO:0005783,endoplasmic reticulum; GO:0005794,Golgi apparatus; GO:0005886,plasma membrane; GO:0005525,GTP binding; GO:0006886,intracellular protein transport; GO:0016192,vesicle-mediated transport	PF00025.21:ADP-ribosylation factor family
gene-LOC110697306	2.21	2.34	1.64	4.8	8.11	12.72	136	137	83	185	464	687	2.14163	8.99128e-06	0.00293397	up	NW_018744460.1	3137354	3151594	-	LOC110697306	--	K21989 calcium permeable stress-gated cation channel | (RefSeq) CSC1-like protein RXW8 isoform X1 (A)	--	CSC1-like protein RXW8 isoform X1 [Chenopodium quinoa]	RecName: Full=CSC1-like protein RXW8;	SubName: Full=Uncharacterized protein {ECO:0000313|EMBL:KNA19393.1};	Uncharacterized conserved protein	GO:0016021,integral component of membrane; GO:0006811,ion transport	PF02714.15:Calcium-dependent channel, 7TM region, putative phosphate
gene-LOC110697411	0	0	0	0	14.21	16.79	0	0	0	0	304	339	10.2425	0.000139308	0.0208004	up	NW_018744460.1	1113513	1114631	-	LOC110697411	--	K09286 EREBP-like factor | (RefSeq) ethylene-responsive transcription factor TINY-like (A)	--	dehydration-responsive element-binding protein 1A-like [Chenopodium quinoa]	RecName: Full=Dehydration-responsive element-binding protein 1A {ECO:0000303|PubMed:9707537}; Short=Protein DREB1A {ECO:0000303|PubMed:9707537}; AltName: Full=C-repeat/dehydration-responsive element-binding factor 3 {ECO:0000303|PubMed:9881163}; Short=C-repeat-binding factor 3 {ECO:0000303|PubMed:9881163}; Short=CRT/DRE-binding factor 3 {ECO:0000303|PubMed:9881163}; AltName: Full=Cold resistance-…	SubName: Full=Uncharacterized protein {ECO:0000313|EMBL:KNA09465.1};	--	GO:0005634,nucleus; GO:0003677,DNA binding; GO:0003700,DNA-binding transcription factor activity; GO:0009631,cold acclimation; GO:0009409,response to cold; GO:0009414,response to water deprivation; GO:0006351,transcription, DNA-templated	PF00847.20:AP2 domain
gene-LOC110697808	5.23	4.74	2.54	0	0.36	0.15	234	202	93	0	15	6	-4.48358	0.000111026	0.0179287	down	NW_018744501.1	885904	889733	+	LOC110697808	--	--	--	rho GTPase-activating protein 2-like [Chenopodium quinoa]	RecName: Full=Rho GTPase-activating protein 2; AltName: Full=Rho-type GTPase-activating protein 2;	SubName: Full=Uncharacterized protein {ECO:0000313|EMBL:KNA13669.1};	GTPase-activator protein	GO:0005096,GTPase activator activity; GO:0007165,signal transduction	PF00620.27:RhoGAP domain
gene-LOC110698105	21.28	20.41	19.09	66.46	53.63	64.52	967	883	711	1889	2263	2570	1.74642	6.21641e-09	5.4276e-06	up	NW_018744502.1	7030275	7033353	-	LOC110698105	--	K13424 WRKY transcription factor 33 | (RefSeq) probable WRKY transcription factor 33 (A)	ko04016: MAPK signaling pathway - plant; ko04626: Plant-pathogen interaction	probable WRKY transcription factor 33 [Chenopodium quinoa]	RecName: Full=Probable WRKY transcription factor 33; AltName: Full=WRKY DNA-binding protein 33;	SubName: Full=Uncharacterized protein {ECO:0000313|EMBL:KNA02986.1};	--	GO:0005634,nucleus; GO:0003700,DNA-binding transcription factor activity; GO:0043565,sequence-specific DNA binding; GO:0044212,transcription regulatory region DNA binding; GO:0010120,camalexin biosynthetic process; GO:0070370,cellular heat acclimation; GO:0034605,cellular response to heat; GO:0042742,defense response to bacterium; GO:0050832,defense response to fungus; GO:0010508,positive regulat…	PF03106.15:WRKY DNA -binding domain
gene-LOC110698291	26.6	24.95	23.07	53.61	73.15	88.69	713	637	507	899	1821	2084	1.6389	8.41189e-10	9.05821e-07	up	NW_018744504.1	343223	345795	-	LOC110698291	--	--	--	tetraspanin-8-like [Chenopodium quinoa]	RecName: Full=Tetraspanin-8;	SubName: Full=Uncharacterized protein {ECO:0000313|EMBL:KNA17614.1};	--	GO:0005794,Golgi apparatus; GO:0016021,integral component of membrane; GO:0016020,membrane; GO:0005886,plasma membrane; GO:0009506,plasmodesma; GO:0050829,defense response to Gram-negative bacterium	PF00335.20:Tetraspanin family
gene-LOC110698536	0.55	0.58	1.58	7.65	4.46	9.35	42	42	99	365	316	625	3.07255	1.6946e-05	0.00460033	up	NW_018744537.1	1230861	1238000	+	LOC110698536	--	K19729 guanine nucleotide-binding protein G(t) subunit alpha 3 | (RefSeq) guanine nucleotide-binding protein alpha-1 subunit-like (A)	--	extra-large guanine nucleotide-binding protein 1-like [Chenopodium quinoa]	RecName: Full=Extra-large guanine nucleotide-binding protein 1; AltName: Full=Extra-large GTP-binding protein 1; Short=Extra-large G-protein 1;	SubName: Full=Uncharacterized protein {ECO:0000313|EMBL:KNA14590.1};	G-protein alpha subunit (small G protein superfamily)	GO:0005834,heterotrimeric G-protein complex; GO:0005634,nucleus; GO:0031683,G-protein beta/gamma-subunit complex binding; GO:0001664,G protein-coupled receptor binding; GO:0005525,GTP binding; GO:0003924,GTPase activity; GO:0046872,metal ion binding; GO:0004871,NA; GO:0007188,adenylate cyclase-modulating G protein-coupled receptor signaling pathway	PF00503.20:G-protein alpha subunit
gene-LOC110698687	1.27	1.08	1.5	2.59	5.14	6.99	128	104	124	163	481	617	2.00221	0.000106066	0.0175716	up	NW_018744537.1	3245250	3252571	-	LOC110698687	--	K05666 ATP-binding cassette, subfamily C (CFTR/MRP), member 2 | (RefSeq) ABC transporter C family member 3-like (A)	ko02010: ABC transporters	ABC transporter C family member 3-like [Chenopodium quinoa]	RecName: Full=ABC transporter C family member 3; Short=ABC transporter ABCC.3; Short=AtABCC3; EC=3.6.3.44; AltName: Full=ATP-energized glutathione S-conjugate pump 3; AltName: Full=Glutathione S-conjugate-transporting ATPase 3; AltName: Full=Multidrug resistance-associated protein 3;	SubName: Full=ABC transporter C family member 3 {ECO:0000313|RefSeq:XP_018812887.1};	Multidrug resistance-associated protein/mitoxantrone resistance protein, ABC superfamily	GO:0048046,apoplast; GO:0016021,integral component of membrane; GO:0000325,plant-type vacuole; GO:0009506,plasmodesma; GO:0005774,vacuolar membrane; GO:0005773,vacuole; GO:0005524,ATP binding; GO:0042626,ATPase activity, coupled to transmembrane movement of substances; GO:0010290,chlorophyll catabolite transmembrane transporter activity; GO:0015431,glutathione S-conjugate-exporting ATPase activit…	PF00005.27:ABC transporter
gene-LOC110698751	2.21	2.55	2.96	7.34	8	8.03	136	149	149	282	456	432	1.71868	1.33925e-05	0.00376213	up	NW_018744537.1	4237990	4243562	+	LOC110698751	--	K17471 sulfate transporter 3 | (RefSeq) probable sulfate transporter 3.4 (A)	--	probable sulfate transporter 3.4 [Chenopodium quinoa]	RecName: Full=Probable sulfate transporter 3.4;	SubName: Full=Uncharacterized protein {ECO:0000313|EMBL:KNA11708.1};	Sulfate/bicarbonate/oxalate exchanger SAT-1 and related transporters (SLC26 family)	GO:0005887,integral component of plasma membrane; GO:0009506,plasmodesma; GO:0008271,secondary active sulfate transmembrane transporter activity; GO:0015116,sulfate transmembrane transporter activity; GO:0015293,symporter activity	PF00916.20:Sulfate permease family
gene-LOC110698771	0.15	0.08	0	1.01	3.02	1.57	6	3	0	26	116	57	4.7889	0.000322657	0.0347448	up	NW_018744537.1	4676138	4680487	+	LOC110698771	--	K13692 UDP-glucose:(indol-3-yl)acetate beta-D-glucosyltransferase [EC:2.4.1.121] | (RefSeq) UDP-glycosyltransferase 84B1-like (A)	--	UDP-glycosyltransferase 82A1-like [Chenopodium quinoa]	RecName: Full=UDP-glycosyltransferase 82A1; EC=2.4.1.-;	RecName: Full=Glycosyltransferase {ECO:0000256|RuleBase:RU362057}; EC=2.4.1.- {ECO:0000256|RuleBase:RU362057};	UDP-glucuronosyl and UDP-glucosyl transferase	GO:0043231,intracellular membrane-bounded organelle; GO:0080043,quercetin 3-O-glucosyltransferase activity; GO:0080044,quercetin 7-O-glucosyltransferase activity; GO:0008152,metabolic process	PF00201.18:UDP-glucoronosyl and UDP-glucosyl transferase
gene-LOC110699044	48.08	46.9	41.83	14.37	4.85	5.01	2091	1942	1491	391	196	191	-2.28021	0.000373275	0.0380951	down	NW_018744560.1	749135	756187	-	LOC110699044	--	--	--	uncharacterized protein LOC110699044 [Chenopodium quinoa]	--	SubName: Full=Uncharacterized protein {ECO:0000313|EMBL:KNA19776.1};	--	--	--
gene-LOC110699252	35.86	37.71	38.7	98.44	103.82	141.56	1337	1339	1183	2296	3595	4627	1.72682	5.64647e-11	1.05948e-07	up	NW_018744582.1	1463248	1465058	-	LOC110699252	--	--	--	nematode resistance protein-like HSPRO2 [Chenopodium quinoa]	RecName: Full=Nematode resistance protein-like HSPRO2; AltName: Full=AKINbetagamma-interacting protein 2; AltName: Full=Ortholog of sugar beet HS1 PRO-1 protein 2; AltName: Full=Protein Hs1pro-2;	SubName: Full=Uncharacterized protein {ECO:0000313|EMBL:KNA14567.1};	--	GO:0005737,cytoplasm; GO:0020037,heme binding; GO:0046872,metal ion binding; GO:0009816,defense response to bacterium, incompatible interaction; GO:0006979,response to oxidative stress; GO:0009751,response to salicylic acid; GO:0019441,tryptophan catabolic process to kynurenine	PF07014.12:Hs1pro-1 protein C-terminus
gene-LOC110699313	9.94	9.86	14.12	19.91	26.58	39.21	746	705	869	935	1853	2580	1.41704	0.000373817	0.0380951	up	NW_018744582.1	2264242	2274108	-	LOC110699313	--	K12447 UDP-sugar pyrophosphorylase [EC:2.7.7.64] | (RefSeq) UDP-sugar pyrophospharylase-like (A)	ko00040: Pentose and glucuronate interconversions; ko00052: Galactose metabolism; ko00053: Ascorbate and aldarate metabolism; ko00520: Amino sugar and nucleotide sugar metabolism	UTP--glucose-1-phosphate uridylyltransferase 3, chloroplastic-like [Chenopodium quinoa]	RecName: Full=UTP--glucose-1-phosphate uridylyltransferase 3, chloroplastic {ECO:0000305}; EC=2.7.7.9 {ECO:0000269|PubMed:19286968}; AltName: Full=UDP-glucose pyrophosphorylase 3 {ECO:0000303|PubMed:19286968}; Flags: Precursor;	SubName: Full=Uncharacterized protein {ECO:0000313|EMBL:KNA24035.1};	--	GO:0009507,chloroplast; GO:0005829,cytosol; GO:0070569,uridylyltransferase activity; GO:0003983,UTP:glucose-1-phosphate uridylyltransferase activity; GO:0009226,nucleotide-sugar biosynthetic process; GO:0046506,sulfolipid biosynthetic process; GO:0006011,UDP-glucose metabolic process	PF01704.18:UTP--glucose-1-phosphate uridylyltransferase
gene-LOC110699369	554.23	472.64	414.26	158.96	245.66	170.33	7235	5875	4433	1298	2978	1949	-1.19191	0.000154733	0.0222162	down	NW_018744582.1	2785324	2786923	+	LOC110699369	--	K02971 small subunit ribosomal protein S21e | (RefSeq) 40S ribosomal protein S21-like (A)	ko03010: Ribosome	40S ribosomal protein S21-like [Chenopodium quinoa]	RecName: Full=40S ribosomal protein S21;	RecName: Full=40S ribosomal protein S21 {ECO:0000256|PIRNR:PIRNR002148};	40S ribosomal protein S21	GO:0022627,cytosolic small ribosomal subunit; GO:0003735,structural constituent of ribosome; GO:0000447,endonucleolytic cleavage in ITS1 to separate SSU-rRNA from 5.8S rRNA and LSU-rRNA from tricistronic rRNA transcript (SSU-rRNA, 5.8S rRNA, LSU-rRNA); GO:0000461,endonucleolytic cleavage to generate mature 3'-end of SSU-rRNA from (SSU-rRNA, 5.8S rRNA, LSU-rRNA); GO:0006412,translation	PF01249.18:Ribosomal protein S21e
gene-LOC110699626	1.15	0.99	2.93	3.89	47.51	51.02	44	36	92	93	1688	1711	4.33169	5.18419e-06	0.0019703	up	NW_018744593.1	2042035	2044988	+	LOC110699626	--	K13946 auxin influx carrier (AUX1 LAX family) | (RefSeq) auxin transporter-like protein 2 (A)	ko04075: Plant hormone signal transduction	GABA transporter 1-like [Chenopodium quinoa]	RecName: Full=GABA transporter 1; Short=AtGAT1; AltName: Full=Bidirectional amino acid transporter 1;	SubName: Full=Uncharacterized protein {ECO:0000313|EMBL:KNA21162.1};	Amino acid transporters	GO:0016021,integral component of membrane; GO:0005886,plasma membrane; GO:0015171,amino acid transmembrane transporter activity; GO:0015185,gamma-aminobutyric acid transmembrane transporter activity; GO:0003333,amino acid transmembrane transport; GO:0015812,gamma-aminobutyric acid transport	PF01490.18:Transmembrane amino acid transporter protein
gene-LOC110700281	5.39	4.27	4.22	10.52	11.05	10.95	195	147	125	238	371	347	1.36509	0.000253952	0.0301615	up	NW_018744626.1	304184	307732	+	LOC110700281	--	K16296 serine carboxypeptidase-like clade I [EC:3.4.16.-] | (RefSeq) serine carboxypeptidase-like 20 (A)	--	serine carboxypeptidase-like 20 [Chenopodium quinoa]	RecName: Full=Serine carboxypeptidase-like 20; EC=3.4.16.-; Flags: Precursor;	RecName: Full=Carboxypeptidase {ECO:0000256|RuleBase:RU361156}; EC=3.4.16.- {ECO:0000256|RuleBase:RU361156};	Serine carboxypeptidases (lysosomal cathepsin A)	GO:0005576,extracellular region; GO:0005777,peroxisome; GO:0005773,vacuole; GO:0004180,carboxypeptidase activity; GO:0016747,transferase activity, transferring acyl groups other than amino-acyl groups; GO:0019748,secondary metabolic process	PF00450.22:Serine carboxypeptidase
gene-LOC110700308	85.86	71.97	8.35	4.97	5.96	3.79	1630	1301	130	59	105	63	-3.30049	9.77933e-05	0.0165404	down	NW_018744626.1	690834	692609	+	LOC110700308	--	--	--	uncharacterized protein At5g48480-like [Chenopodium quinoa]	RecName: Full=Uncharacterized protein At5g48480;	SubName: Full=Uncharacterized protein {ECO:0000313|EMBL:KNA18622.1};	--	GO:0005829,cytosol	PF18029.1:Glyoxalase-like domain
gene-LOC110700605	24.12	24.63	12.48	38.6	49.32	58.79	969	942	411	970	1840	2070	1.39359	0.000181148	0.0242821	up	NW_018744626.1	4433911	4437276	+	LOC110700605	--	--	--	cyclic dof factor 3-like [Chenopodium quinoa]	RecName: Full=Cyclic dof factor 3; AltName: Full=Dof zinc finger protein DOF3.3; Short=AtDOF3.3; AltName: Full=H-protein promoter-binding factor 2a;	SubName: Full=Uncharacterized protein {ECO:0000313|EMBL:KNA15358.1};	--	GO:0005634,nucleus; GO:0003677,DNA binding; GO:0003700,DNA-binding transcription factor activity; GO:0046872,metal ion binding; GO:0009908,flower development; GO:0006355,regulation of transcription, DNA-templated; GO:0006351,transcription, DNA-templated	PF02701.15:Dof domain, zinc finger
gene-LOC110700828	4.61	4.07	6.61	26.31	12.08	18.72	288	242	338	1027	700	1024	2.05105	0.000197195	0.0256377	up	NW_018744626.1	161442	166914	+	LOC110700828	--	--	--	--	--	--	--	--	--
gene-LOC110701318	3.4	5.2	3.34	5.47	27.87	26.13	169	246	136	170	1285	1137	2.38474	0.000333787	0.0353541	up	NW_018744633.1	6235962	6243768	+	LOC110701318	--	K02433 aspartyl-tRNA(Asn)/glutamyl-tRNA(Gln) amidotransferase subunit A [EC:6.3.5.6 6.3.5.7] | (RefSeq) glutamyl-tRNA(Gln) amidotransferase subunit A, chloroplastic/mitochondrial-like (A)	ko00970: Aminoacyl-tRNA biosynthesis	fatty acid amide hydrolase-like isoform X1 [Chenopodium quinoa]	RecName: Full=Fatty acid amide hydrolase; EC=3.5.1.99; AltName: Full=N-acylethanolamine amidohydrolase;	SubName: Full=Uncharacterized protein {ECO:0000313|EMBL:KNA09458.1};	Amidases	GO:0005783,endoplasmic reticulum; GO:0005789,endoplasmic reticulum membrane; GO:0005794,Golgi apparatus; GO:0016021,integral component of membrane; GO:0005886,plasma membrane; GO:0005774,vacuolar membrane; GO:0005773,vacuole; GO:0004040,amidase activity; GO:0103073,anandamide amidohydrolase activity; GO:0047412,N-(long-chain-acyl)ethanolamine deacylase activity; GO:0102077,oleamide hydrolase acti…	PF01425.21:Amidase
gene-LOC110701735	23.49	21.26	35.17	46.79	81.09	80.97	976	841	1198	1216	3129	2949	1.46754	0.00041284	0.0410947	up	NW_018744656.1	367849	369866	+	LOC110701735	--	K09422 transcription factor MYB, plant | (RefSeq) transcription factor MYB44 (A)	--	transcription factor MYB44 [Chenopodium quinoa]	RecName: Full=Transcription factor MYB73 {ECO:0000303|PubMed:11597504}; AltName: Full=Myb-related protein 73 {ECO:0000303|PubMed:11597504}; Short=AtMYB73 {ECO:0000303|PubMed:11597504};	SubName: Full=Uncharacterized protein {ECO:0000313|EMBL:KNA12256.1};	Transcription factor, Myb superfamily	GO:0005634,nucleus; GO:0003700,DNA-binding transcription factor activity; GO:0000981,DNA-binding transcription factor activity, RNA polymerase II-specific; GO:0043565,sequence-specific DNA binding; GO:0001135,RNA polymerase II transcription regulator recruiting activity; GO:0044212,transcription regulatory region DNA binding; GO:0030154,cell differentiation; GO:0019760,glucosinolate metabolic pro…	PF00249.31:Myb-like DNA-binding domain
gene-LOC110701950	12.06	9.58	10.17	22.85	18.42	31.95	583	441	403	691	827	1354	1.32314	0.000260087	0.0305948	up	NW_018744662.1	1556386	1560868	+	LOC110701950	--	--	--	uncharacterized protein ycf45-like [Chenopodium quinoa]	RecName: Full=Uncharacterized protein ycf45; AltName: Full=ORF565;	SubName: Full=Uncharacterized protein {ECO:0000313|EMBL:KNA20588.1};	--	GO:0009507,chloroplast; GO:0005524,ATP binding; GO:0003676,nucleic acid binding	PF13401.6:AAA domain
gene-LOC110702045	49.62	49.43	34.99	63.23	115.31	163.86	2081	1974	1203	1659	4491	6024	1.44578	0.000214835	0.0269298	up	NW_018744662.1	2715344	2719814	+	LOC110702045	--	K09828 Delta24-sterol reductase [EC:1.3.1.72 1.3.1.-] | (RefSeq) delta(24)-sterol reductase-like (A)	ko00100: Steroid biosynthesis	delta(24)-sterol reductase-like [Chenopodium quinoa]	RecName: Full=Delta(24)-sterol reductase; EC=1.3.1.72; AltName: Full=Cell elongation protein diminuto;	SubName: Full=Uncharacterized protein {ECO:0000313|EMBL:KNA18210.1};	FAD-binding protein DIMINUTO	GO:0016021,integral component of membrane; GO:0005516,calmodulin binding; GO:0050614,delta24-sterol reductase activity; GO:0050660,flavin adenine dinucleotide binding; GO:0016614,oxidoreductase activity, acting on CH-OH group of donors	PF01565.23:FAD binding domain
gene-LOC110702520	3.29	2.14	8.22	13.55	39.36	41.4	140	87	287	361	1557	1546	2.81499	0.000113614	0.0181498	up	NW_018744693.1	1784948	1787016	+	LOC110702520	--	K15631 molybdenum cofactor sulfurtransferase [EC:2.8.1.9] | (RefSeq) molybdenum cofactor sulfurase-like isoform X1 (A)	ko00790: Folate biosynthesis	molybdenum cofactor sulfurase-like [Chenopodium quinoa]	RecName: Full=Molybdenum cofactor sulfurase {ECO:0000255|HAMAP-Rule:MF_03050}; Short=MCS {ECO:0000255|HAMAP-Rule:MF_03050}; Short=MOS {ECO:0000255|HAMAP-Rule:MF_03050}; Short=MoCo sulfurase {ECO:0000255|HAMAP-Rule:MF_03050}; EC=2.8.1.9 {ECO:0000255|HAMAP-Rule:MF_03050}; AltName: Full=Molybdenum cofactor sulfurtransferase {ECO:0000255|HAMAP-Rule:MF_03050};	SubName: Full=Uncharacterized protein {ECO:0000313|EMBL:KNA23642.1};	Molybdenum cofactor sulfurase	GO:0008265,Mo-molybdopterin cofactor sulfurase activity; GO:0102867,molybdenum cofactor sulfurtransferase activity; GO:0030151,molybdenum ion binding; GO:0030170,pyridoxal phosphate binding; GO:0006777,Mo-molybdopterin cofactor biosynthetic process	--
gene-LOC110702851	15.43	14.29	14.87	23.28	34.07	35.22	423	373	334	399	867	846	1.16346	0.000114051	0.0181498	up	NW_018742393.1	1043397	1046079	+	LOC110702851	--	--	--	uncharacterized protein LOC110702851 [Chenopodium quinoa]	--	SubName: Full=uncharacterized protein LOC106762046 {ECO:0000313|RefSeq:XP_014501216.1};	--	GO:0016021,integral component of membrane	PF03350.16:Uncharacterized protein family, UPF0114
gene-LOC110702926	7.31	7.49	4.93	35.77	20.13	35.56	282	275	156	863	721	1202	2.37008	1.26073e-07	8.48498e-05	up	NW_018744704.1	4104936	4110956	+	LOC110702926	--	--	--	protein SAR DEFICIENT 1-like [Chenopodium quinoa]	RecName: Full=Protein SAR DEFICIENT 1 {ECO:0000303|PubMed:20921422};	SubName: Full=Uncharacterized protein {ECO:0000313|EMBL:KNA20947.1};	--	GO:0005634,nucleus; GO:0003700,DNA-binding transcription factor activity; GO:0043565,sequence-specific DNA binding; GO:0071219,cellular response to molecule of bacterial origin; GO:0042742,defense response to bacterium; GO:0002229,defense response to oomycetes; GO:0009626,plant-type hypersensitive response; GO:1900426,positive regulation of defense response to bacterium; GO:0080142,regulation of …	PF07887.11:Calmodulin binding protein-like
gene-LOC110703146	0.41	0	0	2.51	7.28	19.01	6	0	0	23	99	244	6.18897	0.000260442	0.0305948	up	NW_018744718.1	144471	145459	-	LOC110703146	--	K20628 expansin | (RefSeq) expansin-A10-like (A)	--	EG45-like domain containing protein [Chenopodium quinoa]	RecName: Full=EG45-like domain containing protein; AltName: Full=Blight-associated protein p12; AltName: Full=Plant natriuretic peptide; Short=PNP; Flags: Precursor;	SubName: Full=Uncharacterized protein {ECO:0000313|EMBL:KNA16851.1};	--	GO:0005576,extracellular region	PF03330.18:Lytic transglycolase
gene-LOC110703220	5.7	5.82	5.52	1.27	1.36	1.84	258	251	205	36	57	73	-1.81619	4.02163e-05	0.00875318	down	NW_018744718.1	683348	690419	+	LOC110703220	--	K10563 formamidopyrimidine-DNA glycosylase [EC:3.2.2.23 4.2.99.18] | (RefSeq) formamidopyrimidine-DNA glycosylase-like isoform X1 (A)	ko03410: Base excision repair	formamidopyrimidine-DNA glycosylase-like isoform X5 [Chenopodium quinoa]	RecName: Full=Formamidopyrimidine-DNA glycosylase; Short=Fapy-DNA glycosylase; EC=3.2.2.23; EC=4.2.99.18; AltName: Full=DNA-(apurinic or apyrimidinic site) lyase FPG1; AltName: Full=Formamidopyrimidine-DNA glycosylase 1; Short=AtFPG-1; AltName: Full=Formamidopyrimidine-DNA glycosylase 2; Short=AtFPG-2; AltName: Full=Protein MutM homolog 1; Short=AtMMH-1; AltName: Full=Protein MutM homolog 2; Shor…	SubName: Full=formamidopyrimidine-DNA glycosylase-like {ECO:0000313|RefSeq:XP_016698479.1};	--	GO:0005634,nucleus; GO:0140078,class I DNA-(apurinic or apyrimidinic site) endonuclease activity; GO:0140080,class III/IV DNA-(apurinic or apyrimidinic site) endonuclease activity; GO:0003684,damaged DNA binding; GO:0019104,DNA N-glycosylase activity; GO:0008534,oxidized purine nucleobase lesion DNA N-glycosylase activity; GO:0008270,zinc ion binding; GO:0006284,base-excision repair; GO:0006281,D…	PF06831.14:Formamidopyrimidine-DNA glycosylase H2TH domain
gene-LOC110703249	1.45	1.98	1.24	7.49	5.28	16.72	94	122	66	303	317	948	2.75459	2.3314e-06	0.00103173	up	NW_018744718.1	1003083	1008918	-	LOC110703249	--	K01115 phospholipase D1/2 [EC:3.1.4.4] | (RefSeq) phospholipase D alpha 1-like (A)	ko00564: Glycerophospholipid metabolism; ko00565: Ether lipid metabolism; ko04144: Endocytosis	phospholipase D alpha 1-like [Chenopodium quinoa]	RecName: Full=Phospholipase D alpha 1; Short=PLD alpha 1; EC=3.1.4.4; AltName: Full=Choline phosphatase 1; AltName: Full=Phosphatidylcholine-hydrolyzing phospholipase D 1;	RecName: Full=Phospholipase D {ECO:0000256|PIRNR:PIRNR036470}; EC=3.1.4.4 {ECO:0000256|PIRNR:PIRNR036470};	Phospholipase D1	GO:0016020,membrane; GO:0005509,calcium ion binding; GO:0070290,N-acylphosphatidylethanolamine-specific phospholipase D activity; GO:0004630,phospholipase D activity; GO:0016042,lipid catabolic process; GO:0046470,phosphatidylcholine metabolic process	PF12357.8:Phospholipase D C terminal
gene-LOC110703315	25.08	22.71	0	0	0	0.11	1081	932	0	0	0	4	-8.7292	0.000141738	0.0208129	down	NW_018742393.1	1652321	1656446	-	LOC110703315	--	--	--	GDSL esterase/lipase 7-like [Chenopodium quinoa]	RecName: Full=GDSL esterase/lipase 7; EC=3.1.1.-; AltName: Full=Extracellular lipase 7; Flags: Precursor;	SubName: Full=Uncharacterized protein {ECO:0000313|EMBL:KNA22223.1};	--	GO:0005576,extracellular region; GO:0016298,lipase activity; GO:0016042,lipid catabolic process	PF00657.22:GDSL-like Lipase/Acylhydrolase
gene-LOC110703458	22.18	25.12	27.12	47.68	54.15	84.4	891	961	893	1198	2020	2972	1.41915	2.20593e-05	0.00551072	up	NW_018744718.1	3617986	3629314	+	LOC110703458	--	--	--	protein PIN-LIKES 7-like [Chenopodium quinoa]	RecName: Full=Protein PIN-LIKES 7 {ECO:0000303|PubMed:22504182}; AltName: Full=Auxin efflux carrier-like protein 7 {ECO:0000303|PubMed:22504182};	SubName: Full=Uncharacterized protein {ECO:0000313|EMBL:KNA06835.1};	Predicted membrane protein	GO:0005789,endoplasmic reticulum membrane; GO:0016021,integral component of membrane; GO:0009734,auxin-activated signaling pathway; GO:0009733,response to auxin; GO:0055085,transmembrane transport	PF03547.18:Membrane transport protein
gene-LOC110704259	3.18	3.82	17.9	25.74	89.5	149.85	49	56	226	248	1280	2023	3.39005	0.000249604	0.0300829	up	NW_018744828.1	445131	446390	-	LOC110704259	--	--	--	abscisic stress-ripening protein 2-like [Chenopodium quinoa]	RecName: Full=Abscisic stress-ripening protein 3;	SubName: Full=Uncharacterized protein {ECO:0000313|EMBL:KNA10636.1};	--	GO:0006950,response to stress	PF02496.16:ABA/WDS induced protein
gene-LOC110704264	4.6	4.24	8.62	33.68	18.2	34.32	73	64	112	334	268	477	2.41929	0.000110166	0.017884	up	NW_018744828.1	467927	469218	-	LOC110704264	--	--	--	abscisic stress-ripening protein 2-like [Chenopodium quinoa]	RecName: Full=Abscisic stress-ripening protein 3;	SubName: Full=ASR2 protein {ECO:0000313|EMBL:CBY05722.1}; Flags: Fragment;	--	GO:0006950,response to stress	PF02496.16:ABA/WDS induced protein
gene-LOC110704422	1.26	0.44	0.77	6.32	3.2	7.72	48	16	24	150	113	257	2.93214	9.21922e-05	0.0156751	up	NW_018744835.1	491882	494503	-	LOC110704422	--	K08900 mitochondrial chaperone BCS1 | (RefSeq) AAA-ATPase ASD, mitochondrial-like (A)	--	AAA-ATPase At3g28580-like [Chenopodium quinoa]	RecName: Full=AAA-ATPase At3g28580; EC=3.6.1.3 {ECO:0000250|UniProtKB:Q9FLD5};	SubName: Full=Uncharacterized protein {ECO:0000313|EMBL:KNA12944.1};	AAA+-type ATPase	GO:0005783,endoplasmic reticulum; GO:0016021,integral component of membrane; GO:0005524,ATP binding; GO:0016887,ATPase activity; GO:0009737,response to abscisic acid; GO:0000304,response to singlet oxygen	PF14363.6:Domain associated at C-terminal with AAA
gene-LOC110704458	75.78	68.88	16.42	2.54	10.98	7.24	1576	1364	280	33	212	132	-2.83112	0.00021516	0.0269298	down	NW_018744835.1	1159097	1162014	+	LOC110704458	--	K01859 chalcone isomerase [EC:5.5.1.6] | (RefSeq) probable chalcone--flavonone isomerase 3 (A)	ko00941: Flavonoid biosynthesis	probable chalcone--flavonone isomerase 3 [Chenopodium quinoa]	RecName: Full=Probable chalcone--flavonone isomerase 3; Short=Chalcone isomerase 3; EC=5.5.1.6; AltName: Full=Chalcone isomerase-like 1;	RecName: Full=Chalcone-flavonone isomerase family protein {ECO:0000256|RuleBase:RU361158};	--	GO:0005783,endoplasmic reticulum; GO:0045430,chalcone isomerase activity; GO:0009813,flavonoid biosynthetic process; GO:0080167,response to karrikin	PF02431.15:Chalcone-flavanone isomerase
gene-LOC110704486	10.95	13.74	11.02	2.59	2.76	5	560	669	462	83	131	224	-1.68391	6.292e-05	0.012099	down	NW_018744835.1	1599557	1605562	-	LOC110704486	--	K16241 transcription factor HY5 | (RefSeq) transcription factor HY5-like (A)	ko04712: Circadian rhythm - plant	transcription factor HY5-like [Chenopodium quinoa]	RecName: Full=Transcription factor HY5; AltName: Full=Protein LONG HYPOCOTYL 5; AltName: Full=bZIP transcription factor 56; Short=AtbZIP56;	SubName: Full=Uncharacterized protein {ECO:0000313|EMBL:KNA16013.1};	Transcriptional activator FOSB/c-Fos and related bZIP transcription factors	GO:0005634,nucleus; GO:0032993,protein-DNA complex; GO:0003677,DNA binding; GO:0003700,DNA-binding transcription factor activity; GO:0003690,double-stranded DNA binding; GO:0000977,RNA polymerase II regulatory region sequence-specific DNA binding; GO:0043565,sequence-specific DNA binding; GO:0044212,transcription regulatory region DNA binding; GO:0009738,abscisic acid-activated signaling pathway;…	PF00170.21:bZIP transcription factor
gene-LOC110704938	45.35	42.63	91.92	8.37	17.18	13.17	381	341	633	44	134	97	-2.14041	0.000460186	0.0445508	down	NW_018744874.1	137857	138264	+	LOC110704938	--	--	--	uncharacterized protein LOC110704938 [Chenopodium quinoa]	--	SubName: Full=Uncharacterized protein {ECO:0000313|EMBL:KNA05283.1};	--	--	--
gene-LOC110704940	12.84	14.37	9.74	17.84	56.88	60.36	275	293	171	239	1131	1133	1.95251	0.000290961	0.0326809	up	NW_018744874.1	145638	146677	-	LOC110704940	--	--	--	putative protein TPRXL [Chenopodium quinoa]	--	SubName: Full=Uncharacterized protein {ECO:0000313|EMBL:KNA16219.1};	--	--	--
gene-LOC110705347	23.25	23.87	22.6	104.09	46.58	68.52	1151	1125	917	3223	2141	2973	1.82757	0.000136516	0.0206082	up	NW_018742410.1	535212	538471	-	LOC110705347	--	K15503 serine/threonine-protein phosphatase 6 regulatory ankyrin repeat subunit B | (RefSeq) uncharacterized protein LOC110720991 (A)	--	uncharacterized protein LOC110705347 [Chenopodium quinoa]	RecName: Full=Ankyrin repeat-containing protein ITN1; AltName: Full=Protein INCREASED TOLERANCE TO NACL {ECO:0000303|PubMed:18643991};	SubName: Full=Uncharacterized protein {ECO:0000313|EMBL:KMS96076.1};	FOG: Ankyrin repeat	GO:0016021,integral component of membrane; GO:0005634,nucleus; GO:0005886,plasma membrane; GO:0034613,cellular protein localization; GO:0009651,response to salt stress; GO:0007165,signal transduction	PF13962.6:Domain of unknown function
gene-LOC110705371	5.86	6.16	2.72	18.5	14.36	22.15	450	450	171	888	1023	1490	2.05415	6.11737e-06	0.0021958	up	NW_018742410.1	614711	627458	-	LOC110705371	--	K00696 sucrose-phosphate synthase [EC:2.4.1.14] | (RefSeq) sucrose-phosphate synthase (A)	ko00500: Starch and sucrose metabolism	sucrose-phosphate synthase [Chenopodium quinoa]	RecName: Full=Sucrose-phosphate synthase; EC=2.4.1.14; AltName: Full=UDP-glucose-fructose-phosphate glucosyltransferase;	SubName: Full=Uncharacterized protein {ECO:0000313|EMBL:KNA09132.1};	Glycosyltransferase	GO:0016157,sucrose synthase activity; GO:0046524,sucrose-phosphate synthase activity; GO:0005986,sucrose biosynthetic process	PF00534.20:Glycosyl transferases group 1
gene-LOC110705423	8.16	8.78	3.35	0.98	0.83	0.59	360	369	121	27	34	23	-2.89479	1.68961e-05	0.00460033	down	NW_018744878.1	1147802	1150821	+	LOC110705423	--	--	--	protein IQ-DOMAIN 1-like [Chenopodium quinoa]	RecName: Full=Protein IQ-DOMAIN 1 {ECO:0000303|PubMed:15960618};	SubName: Full=Uncharacterized protein {ECO:0000313|EMBL:KNA25786.1};	--	GO:0005737,cytoplasm; GO:0005874,microtubule; GO:0005634,nucleus; GO:0005516,calmodulin binding; GO:0008017,microtubule binding	PF13178.6:Protein of unknown function (DUF4005)
gene-LOC110705433	18.99	16.87	9.36	23.35	63.49	60.79	797	674	322	613	2474	2236	1.81075	0.000267302	0.0310736	up	NW_018744878.1	1269471	1273534	-	LOC110705433	--	K06118 UDP-sulfoquinovose synthase [EC:3.13.1.1] | (RefSeq) UDP-sulfoquinovose synthase, chloroplastic-like (A)	ko00520: Amino sugar and nucleotide sugar metabolism; ko00561: Glycerolipid metabolism	UDP-sulfoquinovose synthase, chloroplastic-like [Chenopodium quinoa]	RecName: Full=UDP-sulfoquinovose synthase, chloroplastic; EC=3.13.1.1; AltName: Full=SoSQD1; AltName: Full=Sulfite:UDP-glucose sulfotransferase; AltName: Full=Sulfolipid biosynthesis protein; Flags: Precursor;	SubName: Full=Uncharacterized protein {ECO:0000313|EMBL:KNA24375.1};	UDP-glucose 4-epimerase/UDP-sulfoquinovose synthase	GO:0009570,chloroplast stroma; GO:0050662,coenzyme binding; GO:0019899,enzyme binding; GO:0101016,FMN-binding domain binding; GO:0046507,UDPsulfoquinovose synthase activity	PF01370.21:NAD dependent epimerase/dehydratase family
gene-LOC110705510	11.23	8.91	4.8	16.46	51.87	79.55	397	300	139	364	1703	2465	2.6463	2.5373e-05	0.00607166	up	NW_018744878.1	2649932	2651648	-	LOC110705510	--	--	--	zinc finger CCCH domain-containing protein 23-like [Chenopodium quinoa]	RecName: Full=Zinc finger CCCH domain-containing protein 20; Short=AtC3H20;	SubName: Full=Uncharacterized protein {ECO:0000313|EMBL:KNA23069.1};	CCCH-type Zn-finger protein	GO:0005886,plasma membrane; GO:0003677,DNA binding; GO:0003700,DNA-binding transcription factor activity; GO:0046872,metal ion binding; GO:0006355,regulation of transcription, DNA-templated; GO:0006979,response to oxidative stress	PF00642.24:Zinc finger C-x8-C-x5-C-x3-H type (and similar)
gene-LOC110705559	9.96	11.58	13.94	1.54	3.33	2.3	474	525	544	46	147	96	-2.20663	7.249e-06	0.00249126	down	NW_018744878.1	3324805	3327921	+	LOC110705559	--	K09184 GATA-binding protein, other eukaryote | (RefSeq) uncharacterized protein LOC110691215 (A)	--	GATA transcription factor 12-like [Chenopodium quinoa]	RecName: Full=GATA transcription factor 12 {ECO:0000303|PubMed:15084732};	RecName: Full=GATA transcription factor {ECO:0000256|PIRNR:PIRNR016992};	GATA-4/5/6 transcription factors	GO:0005634,nucleus; GO:0005667,transcription factor complex; GO:0003682,chromatin binding; GO:0003700,DNA-binding transcription factor activity; GO:0000977,RNA polymerase II regulatory region sequence-specific DNA binding; GO:0001085,RNA polymerase II transcription factor binding; GO:0001228,DNA-binding transcription activator activity, RNA polymerase II-specific; GO:0008270,zinc ion binding; GO:…	PF00320.27:GATA zinc finger
gene-LOC110705642	2.33	3.2	2.95	10.31	31.88	36.46	78	102	81	216	991	1070	3.27905	8.37198e-09	7.11728e-06	up	NW_018744878.1	4497993	4500993	+	LOC110705642	--	K12472 epidermal growth factor receptor substrate 15 | (RefSeq) GATA zinc finger domain-containing protein 14-like (A)	ko04144: Endocytosis	BURP domain protein RD22-like [Chenopodium quinoa]	RecName: Full=BURP domain protein RD22 {ECO:0000303|PubMed:9790599}; AltName: Full=Dehydration-responsive protein RD22 {ECO:0000303|PubMed:8479424}; Flags: Precursor;	SubName: Full=Uncharacterized protein {ECO:0000313|EMBL:KNA12476.1};	--	GO:0005768,endosome; GO:0005794,Golgi apparatus; GO:0005802,trans-Golgi network; GO:0009651,response to salt stress	PF03181.15:BURP domain
gene-LOC110705705	42.08	43.17	45.04	89.95	86.59	132.97	1077	1052	945	1440	2058	2983	1.35917	5.29281e-06	0.00198819	up	NW_018744878.1	5049645	5052181	+	LOC110705705	--	--	--	uncharacterized protein LOC110705705 [Chenopodium quinoa]	--	SubName: Full=Uncharacterized protein {ECO:0000313|EMBL:EYU27027.1};	--	GO:0016021,integral component of membrane	PF03350.16:Uncharacterized protein family, UPF0114
gene-LOC110705919	1.82	3.72	5.15	21.19	13.39	16.31	40	78	93	292	274	315	2.3849	0.000351532	0.0366574	up	NW_018744887.1	1005609	1007012	-	LOC110705919	--	--	--	--	--	--	--	--	--
gene-LOC110705950	9.01	9.07	4.48	26.2	25.33	19.93	466	447	190	848	1217	904	1.83735	4.24426e-05	0.00902046	up	NW_018744890.1	146966	150333	+	LOC110705950	--	K14494 DELLA protein | (RefSeq) DELLA protein GAI1-like (A)	ko04075: Plant hormone signal transduction	scarecrow-like protein 21 [Chenopodium quinoa]	RecName: Full=Scarecrow-like transcription factor PAT1; AltName: Full=GRAS family protein 29; Short=AtGRAS-29; AltName: Full=Protein PHYTOCHROME A SIGNAL TRANSDUCTION 1;	SubName: Full=Uncharacterized protein {ECO:0000313|EMBL:KNA24880.1};	--	GO:0005737,cytoplasm; GO:0005634,nucleus; GO:0003700,DNA-binding transcription factor activity; GO:0043565,sequence-specific DNA binding; GO:0004871,NA; GO:0009640,photomorphogenesis; GO:0006355,regulation of transcription, DNA-templated; GO:0006351,transcription, DNA-templated	PF03514.14:GRAS domain family
gene-LOC110706377	1.86	1.45	2.29	5.44	4.91	6.91	127	94	128	232	311	413	1.73483	0.000201876	0.025777	up	NW_018744955.1	826647	842538	+	LOC110706377	--	K21989 calcium permeable stress-gated cation channel | (RefSeq) CSC1-like protein At1g69450 (A)	--	CSC1-like protein At1g69450 [Chenopodium quinoa]	RecName: Full=CSC1-like protein At1g69450;	SubName: Full=Uncharacterized protein {ECO:0000313|EMBL:KNA15382.1};	Uncharacterized conserved protein	GO:0016021,integral component of membrane; GO:0006811,ion transport	PF02714.15:Calcium-dependent channel, 7TM region, putative phosphate
gene-LOC110706546	11.24	11.05	5.26	36.35	23.98	37.51	357	334	137	722	707	1044	1.99222	3.15694e-05	0.00718205	up	NW_018744988.1	835724	839234	-	LOC110706546	--	K19996 phosphatidylinositol transfer protein SFH5 | (RefSeq) patellin-4-like (A)	--	random slug protein 5-like [Chenopodium quinoa]	RecName: Full=Patellin-6;	SubName: Full=Uncharacterized protein {ECO:0000313|EMBL:KNA13312.1};	Phosphatidylinositol transfer protein PDR16 and related proteins	GO:0005737,cytoplasm; GO:0005886,plasma membrane; GO:0008289,lipid binding; GO:0007049,cell cycle; GO:0051301,cell division	PF00650.20:CRAL/TRIO domain
gene-LOC110706610	2.05	2.99	11.11	27.4	30.32	62.47	57	79	253	476	782	1521	2.91965	0.000318033	0.0343957	up	NW_018744988.1	1791045	1792393	-	LOC110706610	--	--	--	protein EXORDIUM-like [Chenopodium quinoa]	RecName: Full=Protein EXORDIUM; Flags: Precursor;	SubName: Full=Uncharacterized protein {ECO:0000313|EMBL:KNA15759.1};	--	GO:0048046,apoplast; GO:0005618,cell wall; GO:0005615,extracellular space; GO:0005794,Golgi apparatus; GO:0009505,plant-type cell wall; GO:0009741,response to brassinosteroid	PF04674.12:Phosphate-induced protein 1 conserved region
gene-LOC110706613	11.95	11.4	7.01	63.8	40.57	55.94	283	257	136	945	892	1161	2.56797	3.75397e-09	3.46491e-06	up	NW_018744988.1	1817673	1818822	-	LOC110706613	--	--	--	protein EXORDIUM-like [Chenopodium quinoa]	RecName: Full=Protein EXORDIUM; Flags: Precursor;	SubName: Full=Uncharacterized protein {ECO:0000313|EMBL:KNA15759.1};	--	GO:0048046,apoplast; GO:0005618,cell wall; GO:0005615,extracellular space; GO:0005794,Golgi apparatus; GO:0009505,plant-type cell wall; GO:0009741,response to brassinosteroid	PF04674.12:Phosphate-induced protein 1 conserved region
gene-LOC110706620	94.44	83.88	71.54	23.41	33.97	42.78	2380	2013	1478	369	795	945	-1.21054	4.82666e-05	0.00986869	down	NW_018744988.1	1900959	1903025	+	LOC110706620	--	K06630 14-3-3 protein epsilon | (RefSeq) LOW QUALITY PROTEIN: 14-3-3-like protein (A)	--	LOW QUALITY PROTEIN: 14-3-3-like protein [Chenopodium quinoa]	RecName: Full=14-3-3-like protein;	SubName: Full=14-3-3 protein {ECO:0000313|EMBL:AGC13184.1};	Multifunctional chaperone (14-3-3 family)	GO:0019904,protein domain specific binding	PF00244.20:14-3-3 protein
gene-LOC110706917	1.93	1.45	5.88	14.64	38.98	53.69	60	43	150	285	1127	1465	3.54811	5.6039e-06	0.0020572	up	NW_018744991.1	1965360	1969081	+	LOC110706917	--	--	--	uncharacterized protein LOC110706917 [Chenopodium quinoa]	--	SubName: Full=Uncharacterized protein {ECO:0000313|EMBL:KNA08111.1};	--	--	PF04720.12:PDDEXK-like family of unknown function
gene-LOC110706940	10.44	11.53	12.4	17.01	57.37	156.57	153	161	149	156	781	2012	2.7685	0.00029636	0.0330135	up	NW_018744991.1	2485390	2486874	-	LOC110706940	--	--	--	auxin-repressed 12.5 kDa protein-like [Chenopodium quinoa]	RecName: Full=Auxin-repressed 12.5 kDa protein;	SubName: Full=Uncharacterized protein {ECO:0000313|EMBL:KNA05025.1};	--	GO:0009734,auxin-activated signaling pathway	PF05564.12:Dormancy/auxin associated protein
gene-LOC110706946	9.69	8.32	7.22	26.93	37.77	42.31	280	229	171	487	1014	1072	2.20075	6.32022e-13	2.26861e-09	up	NW_018744991.1	2609740	2611143	-	LOC110706946	--	K09286 EREBP-like factor | (RefSeq) ethylene-responsive transcription factor 4-like (A)	--	ethylene-responsive transcription factor 4-like [Chenopodium quinoa]	RecName: Full=Ethylene-responsive transcription factor 9; Short=AtERF9; AltName: Full=Ethylene-responsive element-binding factor 9; Short=EREBP-9;	SubName: Full=Uncharacterized protein {ECO:0000313|EMBL:KNA13889.1};	--	GO:0016020,membrane; GO:0005634,nucleus; GO:0003700,DNA-binding transcription factor activity; GO:0043565,sequence-specific DNA binding; GO:0006952,defense response; GO:0009873,ethylene-activated signaling pathway; GO:0019760,glucosinolate metabolic process; GO:0006351,transcription, DNA-templated	PF00847.20:AP2 domain
gene-LOC110707091	2.85	2.82	4.36	10.79	12.4	14.5	193	182	242	457	780	861	2.01067	1.34938e-06	0.000631763	up	NW_018744991.1	3668948	3675089	-	LOC110707091	--	--	--	--	--	--	--	--	--
gene-LOC110707310	6.54	6.16	14.52	33.39	33.89	39.46	283	254	515	904	1362	1497	2.06205	0.000119471	0.0187355	up	NW_018744996.1	2484106	2487235	-	LOC110707310	--	K18134 EGF domain-specific O-GlcNAc transferase [EC:2.4.1.255] | (RefSeq) uncharacterized protein LOC110723588 (A)	ko00514: Other types of O-glycan biosynthesis	uncharacterized protein LOC110707310 [Chenopodium quinoa]	--	SubName: Full=Uncharacterized protein {ECO:0000313|EMBL:KNA05084.1};	Uncharacterized conserved protein	GO:0016021,integral component of membrane; GO:0016757,transferase activity, transferring glycosyl groups	PF04577.14:Protein of unknown function (DUF563)
gene-LOC110707960	189.15	152.78	74.89	16	34.25	16.66	2551	1962	828	135	429	197	-2.48825	4.51078e-06	0.00175567	down	NW_018745003.1	3681211	3681865	-	LOC110707960	--	K11252 histone H2B | (RefSeq) histone H2B (A)	--	PREDICTED: probable histone H2B.1 isoform X1 [Beta vulgaris subsp. vulgaris]	RecName: Full=Histone H2B.11;	RecName: Full=Histone H2B {ECO:0000256|RuleBase:RU000451};	Histone H2B	GO:0000786,nucleosome; GO:0005634,nucleus; GO:0003677,DNA binding; GO:0046982,protein heterodimerization activity	PF00125.24:Core histone H2A/H2B/H3/H4
gene-LOC110708057	12.2	12.66	9.82	46.22	107.13	92.21	244	241	161	578	1989	1616	2.92572	5.17462e-13	2.08958e-09	up	NW_018745003.1	4960331	4961301	+	LOC110708057	--	--	--	putative protein TPRXL [Chenopodium quinoa]	--	SubName: Full=Uncharacterized protein {ECO:0000313|EMBL:KNA22668.1};	--	--	--
gene-LOC110708200	2.49	2.38	3.39	7.23	6.63	11.89	130	118	145	236	321	544	1.7356	0.000296185	0.0330135	up	NW_018745013.1	1094856	1099732	+	LOC110708200	--	K03265 peptide chain release factor subunit 1 | (RefSeq) eukaryotic peptide chain release factor subunit 1-3-like (A)	ko03015: mRNA surveillance pathway	eukaryotic peptide chain release factor subunit 1-3-like [Chenopodium quinoa]	RecName: Full=Eukaryotic peptide chain release factor subunit 1-3; Short=Eukaryotic release factor 1-3; Short=eRF1-3; AltName: Full=Omnipotent suppressor protein 1 homolog 3; Short=SUP1 homolog 3;	SubName: Full=Uncharacterized protein {ECO:0000313|EMBL:KNA16774.1};	Peptide chain release factor 1 (eRF1)	GO:0005737,cytoplasm; GO:0003747,translation release factor activity; GO:0040008,regulation of growth; GO:0006415,translational termination	PF03464.15:eRF1 domain 2
gene-LOC110708718	7.84	9.78	12.62	29.58	22.89	33.34	251	298	331	592	680	935	1.62132	0.000199371	0.0256377	up	NW_018745024.1	11664380	11669638	+	LOC110708718	--	K17506 protein phosphatase 1L [EC:3.1.3.16] | (RefSeq) probable protein phosphatase 2C 11 (A)	--	probable protein phosphatase 2C 73 [Chenopodium quinoa]	RecName: Full=Probable protein phosphatase 2C 73; Short=AtPP2C73; EC=3.1.3.16; AltName: Full=AtPPC6;7;	SubName: Full=Uncharacterized protein {ECO:0000313|EMBL:KNA12988.1};	Serine/threonine protein phosphatase	GO:0005886,plasma membrane; GO:0046872,metal ion binding; GO:0004722,protein serine/threonine phosphatase activity; GO:0009819,drought recovery; GO:0000226,microtubule cytoskeleton organization; GO:0045926,negative regulation of growth; GO:0006470,protein dephosphorylation	PF00481.21:Protein phosphatase 2C
gene-LOC110709177	2.72	2.39	0.7	3.33	12.46	18.81	292	245	62	224	1244	1773	2.66019	0.000424537	0.0416859	up	NW_018742418.1	2327966	2343682	+	LOC110709177	--	K08244 alpha-glucan, water dikinase [EC:2.7.9.4] | (RefSeq) alpha-glucan water dikinase, chloroplastic-like (A)	--	alpha-glucan water dikinase, chloroplastic-like [Chenopodium quinoa]	RecName: Full=Alpha-glucan water dikinase, chloroplastic; EC=2.7.9.4; AltName: Full=Starch-related protein R1; Flags: Precursor;	SubName: Full=Uncharacterized protein {ECO:0000313|EMBL:KMS97340.1};	--	GO:0009507,chloroplast; GO:0050521,alpha-glucan, water dikinase activity; GO:0005524,ATP binding; GO:0046872,metal ion binding; GO:0005975,carbohydrate metabolic process	PF01326.19:Pyruvate phosphate dikinase, PEP/pyruvate binding domain
gene-LOC110709640	2.65	3.52	3.7	9.55	12.56	15.97	83	105	95	187	365	438	2.04605	3.00543e-06	0.00126091	up	NW_018745080.1	489914	494064	+	LOC110709640	--	K17506 protein phosphatase 1L [EC:3.1.3.16] | (RefSeq) probable protein phosphatase 2C 10 (A)	--	probable protein phosphatase 2C 10 [Chenopodium quinoa]	RecName: Full=Probable protein phosphatase 2C 10; Short=AtPP2C10; EC=3.1.3.16;	SubName: Full=Uncharacterized protein {ECO:0000313|EMBL:KNA22160.1};	Serine/threonine protein phosphatase	GO:0005886,plasma membrane; GO:0046872,metal ion binding; GO:0004722,protein serine/threonine phosphatase activity	PF00481.21:Protein phosphatase 2C
gene-LOC110709660	1.61	1.92	4.69	10.31	12.19	21.14	44	50	105	176	309	506	2.46138	0.000417244	0.0410947	up	NW_018745080.1	894133	895458	-	LOC110709660	--	--	--	protein EXORDIUM-like [Chenopodium quinoa]	RecName: Full=Protein EXORDIUM; Flags: Precursor;	SubName: Full=Uncharacterized protein {ECO:0000313|EMBL:KNA15759.1};	--	GO:0048046,apoplast; GO:0005618,cell wall; GO:0005615,extracellular space; GO:0005794,Golgi apparatus; GO:0009505,plant-type cell wall; GO:0009741,response to brassinosteroid	PF04674.12:Phosphate-induced protein 1 conserved region
gene-LOC110709695	0	0.21	0	7.43	2.08	4.74	0	4	0	94	39	84	6.30626	0.000161607	0.0227979	up	NW_018745080.1	1171784	1172765	-	LOC110709695	--	--	--	uncharacterized protein LOC110709695 [Chenopodium quinoa]	--	SubName: Full=Uncharacterized protein {ECO:0000313|EMBL:KNA12195.1};	--	--	--
gene-LOC110709711	12.75	9.78	4.2	0.79	1.9	1.67	593	433	160	23	82	68	-2.48763	0.000109132	0.0178056	down	NW_018745080.1	1629649	1632864	+	LOC110709711	--	--	--	zinc-finger homeodomain protein 1-like isoform X1 [Chenopodium quinoa]	RecName: Full=Zinc-finger homeodomain protein 1; Short=OsZHD1;	SubName: Full=Uncharacterized protein {ECO:0000313|EMBL:KNA20929.1};	--	GO:0005634,nucleus; GO:0003677,DNA binding; GO:0046872,metal ion binding; GO:0006355,regulation of transcription, DNA-templated; GO:0006351,transcription, DNA-templated	PF04770.12:ZF-HD protein dimerisation region
gene-LOC110710230	3.19	3.12	1.48	6.64	7.95	9.8	205	191	78	267	474	552	1.78203	0.000102678	0.0171866	up	NW_018745170.1	1953348	1956467	-	LOC110710230	--	K13457 disease resistance protein RPM1 | (RefSeq) disease resistance protein RPM1-like (A)	ko04626: Plant-pathogen interaction	disease resistance protein RGA2-like [Chenopodium quinoa]	RecName: Full=Disease resistance protein RGA2; AltName: Full=Blight resistance protein RPI; AltName: Full=RGA2-blb;	SubName: Full=NBS-LRR type resistance protein {ECO:0000313|EMBL:ABJ99599.1};	Apoptotic ATPase	GO:0043531,ADP binding; GO:0005524,ATP binding; GO:0006952,defense response	PF00931.22:NB-ARC domain
gene-LOC110710251	8.95	7.87	12.18	23.37	27.58	39.46	338	283	377	552	967	1306	1.72972	2.10378e-05	0.00547584	up	NW_018745170.1	4081881	4084840	+	LOC110710251	--	K03231 elongation factor 1-alpha | (RefSeq) elongation factor 1-alpha (A)	ko03013: RNA transport	elongation factor 1-alpha [Chenopodium quinoa]	RecName: Full=Elongation factor 1-alpha; Short=EF-1-alpha;	RecName: Full=Elongation factor 1-alpha {ECO:0000256|RuleBase:RU000325};	Translation elongation factor EF-1 alpha/Tu	GO:0005737,cytoplasm; GO:0005622,intracellular; GO:0005525,GTP binding; GO:0003924,GTPase activity; GO:0003746,translation elongation factor activity	PF00009.27:Elongation factor Tu GTP binding domain
gene-LOC110710546	6.88	7.87	5.33	15.14	12.81	15.04	337	367	214	464	583	646	1.24786	0.000482898	0.0464286	up	NW_018745174.1	2167962	2173059	-	LOC110710546	--	K13427 nitric-oxide synthase, plant [EC:1.14.13.39] | (RefSeq) putative nitric oxide synthase (A)	ko00220: Arginine biosynthesis; ko00330: Arginine and proline metabolism; ko04626: Plant-pathogen interaction	GTP-binding protein BRASSINAZOLE INSENSITIVE PALE GREEN 2, chloroplastic-like [Chenopodium quinoa]	RecName: Full=GTP-binding protein BRASSINAZOLE INSENSITIVE PALE GREEN 2, chloroplastic {ECO:0000303|PubMed:19919572}; Short=Protein BRZ-INSENSITIVE-PALE GREEN 2 {ECO:0000303|PubMed:19919572}; Flags: Precursor;	SubName: Full=Uncharacterized protein {ECO:0000313|EMBL:KNA03281.1};	Predicted GTPases	GO:0009507,chloroplast; GO:0009570,chloroplast stroma; GO:0005739,mitochondrion; GO:0005525,GTP binding; GO:0003924,GTPase activity; GO:0019843,rRNA binding; GO:0009742,brassinosteroid mediated signaling pathway; GO:0009658,chloroplast organization; GO:1901259,chloroplast rRNA processing; GO:0032502,developmental process; GO:1904143,positive regulation of carotenoid biosynthetic process; GO:19023…	PF01926.23:50S ribosome-binding GTPase
gene-LOC110710572	85.05	88.25	46.74	116.15	228.93	230.66	9533	9419	4295	8144	23830	22663	1.5033	0.000123654	0.0192978	up	NW_018745174.1	1105956	1130541	+	LOC110710572	--	K00284 glutamate synthase (ferredoxin) [EC:1.4.7.1] | (RefSeq) ferredoxin-dependent glutamate synthase, chloroplastic (A)	ko00630: Glyoxylate and dicarboxylate metabolism; ko00910: Nitrogen metabolism	ferredoxin-dependent glutamate synthase, chloroplastic [Chenopodium quinoa]	RecName: Full=Ferredoxin-dependent glutamate synthase, chloroplastic; EC=1.4.7.1; AltName: Full=Fd-GOGAT; Short=SoFdGOGAT;	SubName: Full=Uncharacterized protein {ECO:0000313|EMBL:KNA18696.1};	Glutamate synthase	GO:0009570,chloroplast stroma; GO:0051538,3 iron, 4 sulfur cluster binding; GO:0019899,enzyme binding; GO:0016041,glutamate synthase (ferredoxin) activity; GO:0046872,metal ion binding; GO:0006541,glutamine metabolic process; GO:0097054,L-glutamate biosynthetic process; GO:0055114,oxidation-reduction process	PF00310.21:Glutamine amidotransferases class-II
gene-LOC110710691	0.27	0.1	0	4.66	11.28	19.23	3	1	0	32	115	185	6.61912	3.16112e-07	0.000182357	up	NW_018742418.1	4947294	4948340	+	LOC110710691	--	--	--	--	--	--	--	--	--
gene-LOC110710941	21	23.63	23.19	33.87	52.75	47.77	813	871	736	820	1896	1621	1.09725	0.000199991	0.0256377	up	NW_018745190.1	818066	821225	-	LOC110710941	--	K01177 beta-amylase [EC:3.2.1.2] | (RefSeq) beta-amylase 3, chloroplastic-like (A)	ko00500: Starch and sucrose metabolism	inactive beta-amylase 9-like [Chenopodium quinoa]	RecName: Full=Inactive beta-amylase 9; AltName: Full=1,4-alpha-D-glucan maltohydrolase; AltName: Full=Inactive beta-amylase 3;	RecName: Full=Beta-amylase {ECO:0000256|RuleBase:RU000509}; EC=3.2.1.2 {ECO:0000256|RuleBase:RU000509};	--	GO:0005737,cytoplasm; GO:0016161,beta-amylase activity; GO:0000272,polysaccharide catabolic process	PF01373.17:Glycosyl hydrolase family 14
gene-LOC110711702	9.34	10.09	6.05	0	0.17	0.18	237	244	126	0	4	4	-6.01666	1.57478e-10	2.42254e-07	down	NW_018742418.1	6587045	6591189	+	LOC110711702	--	K13464 jasmonate ZIM domain-containing protein | (RefSeq) protein TIFY 9-like isoform X1 (A)	ko04075: Plant hormone signal transduction	protein TIFY 9-like isoform X1 [Chenopodium quinoa]	RecName: Full=Protein TIFY 9; AltName: Full=Jasmonate ZIM domain-containing protein 10; AltName: Full=Protein JASMONATE-ASSOCIATED 1; AltName: Full=Protein JAZ10;	SubName: Full=Uncharacterized protein {ECO:0000313|EMBL:KNA14931.1};	--	GO:0005634,nucleus; GO:0042803,protein homodimerization activity; GO:0003714,transcription corepressor activity; GO:0006952,defense response; GO:1903507,negative regulation of nucleic acid-templated transcription; GO:2000022,regulation of jasmonic acid mediated signaling pathway; GO:0010112,regulation of systemic acquired resistance; GO:0006355,regulation of transcription, DNA-templated; GO:00097…	PF06200.14:tify domain
gene-LOC110711750	8.81	8.63	9.08	17.58	16.44	21.22	491	458	415	613	851	1037	1.18263	8.2486e-05	0.0146172	up	NW_018745281.1	914958	918606	+	LOC110711750	--	--	--	bZIP transcription factor 17-like [Chenopodium quinoa]	RecName: Full=bZIP transcription factor 17 {ECO:0000303|PubMed:11906833}; Short=AtbZIP17 {ECO:0000303|PubMed:11906833};	SubName: Full=Uncharacterized protein {ECO:0000313|EMBL:KNA05108.1};	--	GO:0005783,endoplasmic reticulum; GO:0005789,endoplasmic reticulum membrane; GO:0000139,Golgi membrane; GO:0016021,integral component of membrane; GO:0005634,nucleus; GO:0003677,DNA binding; GO:0003700,DNA-binding transcription factor activity; GO:0042538,hyperosmotic salinity response; GO:0045893,positive regulation of transcription, DNA-templated; GO:0006355,regulation of transcription, DNA-tem…	PF00170.21:bZIP transcription factor
gene-LOC110711858	2.48	2.69	2.64	9.17	9.28	14.99	86	89	75	199	299	456	2.20575	2.33035e-07	0.000147612	up	NW_018745286.1	2899794	2903450	+	LOC110711858	--	K20536 mitogen-activated protein kinase 3 [EC:2.7.11.24] | (RefSeq) mitogen-activated protein kinase 3-like (A)	ko04016: MAPK signaling pathway - plant; ko04626: Plant-pathogen interaction	mitogen-activated protein kinase 3-like [Chenopodium quinoa]	RecName: Full=Mitogen-activated protein kinase 3; Short=AtMPK3; Short=MAP kinase 3; EC=2.7.11.24;	RecName: Full=Mitogen-activated protein kinase {ECO:0000256|RuleBase:RU361165, ECO:0000256|SAAS:SAAS00652812}; EC=2.7.11.24 {ECO:0000256|RuleBase:RU361165, ECO:0000256|SAAS:SAAS00652812};	Mitogen-activated protein kinase	GO:0005737,cytoplasm; GO:0005634,nucleus; GO:0005524,ATP binding; GO:0004707,MAP kinase activity; GO:0004672,protein kinase activity; GO:0009738,abscisic acid-activated signaling pathway; GO:0010120,camalexin biosynthetic process; GO:0042742,defense response to bacterium; GO:0050832,defense response to fungus; GO:0010229,inflorescence development; GO:0048481,plant ovule development; GO:0009626,pl…	PF00069.25:Protein kinase domain
gene-LOC110711973	16.29	16.22	15.62	42.22	30.94	33.59	982	931	772	1592	1732	1775	1.30368	0.000241997	0.0294393	up	NW_018745286.1	6774349	6782984	-	LOC110711973	--	K17550 protein phosphatase 1 regulatory subunit 7 | (RefSeq) protein phosphatase 1 regulatory subunit pprA-like (A)	--	uncharacterized protein LOC110711973 [Chenopodium quinoa]	RecName: Full=187-kDa microtubule-associated protein AIR9 {ECO:0000303|PubMed:17027491}; AltName: Full=Auxin-induced in root cultures protein 9;	SubName: Full=Uncharacterized protein {ECO:0000313|EMBL:KNA16043.1};	Protein phosphatase 1, regulatory subunit, and related proteins	GO:0055028,cortical microtubule; GO:0009524,phragmoplast; GO:0005886,plasma membrane; GO:0009506,plasmodesma; GO:0009574,preprophase band; GO:0007049,cell cycle; GO:0051301,cell division; GO:0010102,lateral root morphogenesis; GO:0009733,response to auxin	PF12799.7:Leucine Rich repeats (2 copies)
gene-LOC110711980	15.84	16.54	30.68	3.06	4.69	4.57	182	181	289	22	50	46	-2.27082	0.000327594	0.0350428	down	NW_018745286.1	1739181	1742442	-	LOC110711980	--	--	--	uncharacterized protein LOC110711980 [Chenopodium quinoa]	--	SubName: Full=Uncharacterized protein {ECO:0000313|EMBL:KNA10041.1};	--	--	--
gene-LOC110712040	4.4	3.34	1.96	5.83	15.79	18.7	310	224	113	257	1033	1155	2.15093	0.000134204	0.0204218	up	NW_018742418.1	6967910	6980763	+	LOC110712040	--	K01176 alpha-amylase [EC:3.2.1.1] | (RefSeq) alpha-amylase 3, chloroplastic-like (A)	ko00500: Starch and sucrose metabolism	alpha-amylase 3, chloroplastic-like [Chenopodium quinoa]	RecName: Full=Alpha-amylase 3, chloroplastic {ECO:0000303|PubMed:15637061}; Short=AtAMY3 {ECO:0000303|PubMed:15637061}; EC=3.2.1.1 {ECO:0000269|PubMed:24089528}; AltName: Full=1,4-alpha-D-glucan glucanohydrolase; Flags: Precursor;	SubName: Full=Uncharacterized protein {ECO:0000313|EMBL:KNA25529.1};	Alpha-amylase	GO:0009507,chloroplast; GO:0009570,chloroplast stroma; GO:0004556,alpha-amylase activity; GO:0103025,alpha-amylase activity (releasing maltohexaose); GO:0005509,calcium ion binding; GO:0005983,starch catabolic process	PF07821.12:Alpha-amylase C-terminal beta-sheet domain
gene-LOC110712355	2.08	2.1	2.59	4.74	7.65	8.67	133	128	136	190	455	487	1.73089	5.08411e-05	0.0103297	up	NW_018745323.1	684406	691000	+	LOC110712355	--	K08332 vacuolar protein 8 | (RefSeq) U-box domain-containing protein 4-like (A)	--	U-box domain-containing protein 45-like [Chenopodium quinoa]	RecName: Full=U-box domain-containing protein 6; EC=2.3.2.27; AltName: Full=Plant U-box protein 6; AltName: Full=RING-type E3 ubiquitin transferase PUB6 {ECO:0000305};	RecName: Full=RING-type E3 ubiquitin transferase {ECO:0000256|SAAS:SAAS00702733}; EC=2.3.2.27 {ECO:0000256|SAAS:SAAS00702733};	FOG: Armadillo/beta-catenin-like repeats	GO:0009507,chloroplast; GO:0004842,ubiquitin-protein transferase activity	PF04564.15:U-box domain
gene-LOC110712602	0	0	0	0.72	1.05	2.62	0	0	0	18	39	92	8.2587	5.5703e-05	0.0111079	up	NW_018745323.1	1942315	1945053	+	LOC110712602	--	K15402 fatty acid omega-hydroxylase [EC:1.14.-.-] | (RefSeq) cytochrome P450 86B1-like (A)	ko00073: Cutin, suberine and wax biosynthesis	cytochrome P450 86B1-like [Chenopodium quinoa]	RecName: Full=Cytochrome P450 86B1; EC=1.14.-.-;	SubName: Full=Uncharacterized protein {ECO:0000313|EMBL:KNA21514.1};	Cytochrome P450 CYP4/CYP19/CYP26 subfamilies	GO:0005783,endoplasmic reticulum; GO:0005789,endoplasmic reticulum membrane; GO:0016021,integral component of membrane; GO:0020037,heme binding; GO:0005506,iron ion binding; GO:0004497,monooxygenase activity; GO:0016705,oxidoreductase activity, acting on paired donors, with incorporation or reduction of molecular oxygen; GO:0071555,cell wall organization; GO:0010345,suberin biosynthetic process; …	PF00067.22:Cytochrome P450
gene-LOC110712611	39.43	46.7	42.61	114.15	202.97	213.97	1868	2107	1655	3383	8930	8886	2.14136	7.46908e-12	2.01074e-08	up	NW_018745323.1	2461853	2464710	-	LOC110712611	--	K00737 beta-1,4-mannosyl-glycoprotein beta-1,4-N-acetylglucosaminyltransferase [EC:2.4.1.144] | (RefSeq) uncharacterized protein LOC110712611 isoform X1 (A)	ko00510: N-Glycan biosynthesis	uncharacterized protein LOC110712611 isoform X1 [Chenopodium quinoa]	--	SubName: Full=Uncharacterized protein {ECO:0000313|EMBL:KNA25730.1};	--	GO:0016021,integral component of membrane; GO:0003830,beta-1,4-mannosylglycoprotein 4-beta-N-acetylglucosaminyltransferase activity; GO:0006487,protein N-linked glycosylation	PF04724.13:Glycosyltransferase family 17
gene-LOC110712780	0.1	0	0	3.42	1.09	2.67	8	0	0	165	78	181	6.30821	6.56109e-05	0.012468	up	NW_018745335.1	20047	24815	+	LOC110712780	--	--	--	FT-interacting protein 1-like [Chenopodium quinoa]	RecName: Full=FT-interacting protein 1 {ECO:0000303|PubMed:22529749};	SubName: Full=Uncharacterized protein {ECO:0000313|EMBL:KNA03956.1};	--	GO:0005783,endoplasmic reticulum; GO:0005789,endoplasmic reticulum membrane; GO:0016021,integral component of membrane; GO:0009506,plasmodesma; GO:0009511,plasmodesmatal endoplasmic reticulum; GO:0008565,protein transporter activity; GO:0016757,transferase activity, transferring glycosyl groups; GO:0034613,cellular protein localization; GO:0009908,flower development; GO:0048574,long-day photoperi…	PF00168.30:C2 domain
gene-LOC110712882	3.93	4.74	7.98	21.59	16.68	25.05	196	225	326	673	772	1094	2.03123	5.78247e-05	0.0113235	up	NW_018745395.1	344488	348925	-	LOC110712882	--	--	--	IQ domain-containing protein IQM1-like [Chenopodium quinoa]	RecName: Full=IQ domain-containing protein IQM1 {ECO:0000305}; AltName: Full=IQ motif-containing protein 1 {ECO:0000303|Ref.6};	SubName: Full=Calmodulin-binding protein {ECO:0000313|EMBL:ABM55247.1};	--	GO:0005737,cytoplasm; GO:0005634,nucleus; GO:0005516,calmodulin binding; GO:0010119,regulation of stomatal movement	PF00612.27:IQ calmodulin-binding motif
gene-LOC110712947	23.77	24.16	21.95	7.55	10.72	11.26	559	541	423	111	234	232	-1.12769	0.000460609	0.0445508	down	NW_018742418.1	8799143	8802603	-	LOC110712947	--	--	--	--	--	--	--	--	--
gene-LOC110713689	36.22	32.64	37.15	5.55	11.56	9.06	584	501	491	56	173	128	-1.91402	1.16016e-05	0.00337648	down	NW_018745448.1	7851171	7855168	+	LOC110713689	--	K12832 splicing factor 3B subunit 5 | (RefSeq) uncharacterized protein At4g14342-like (A)	ko03040: Spliceosome	uncharacterized protein At4g14342-like [Chenopodium quinoa]	RecName: Full=Uncharacterized protein At3g23325;	SubName: Full=uncharacterized protein At4g14342-like {ECO:0000313|RefSeq:XP_016730178.1};	Uncharacterized conserved protein	GO:0071011,precatalytic spliceosome; GO:0005689,U12-type spliceosomal complex; GO:0005686,U2 snRNP; GO:0000398,mRNA splicing, via spliceosome	PF07189.11:Splicing factor 3B subunit 10 (SF3b10)
gene-LOC110713888	0.31	0.38	0.72	6.03	3.57	4.98	20	23	38	242	213	280	3.50014	3.04512e-07	0.000182172	up	NW_018745454.1	5036176	5039293	-	LOC110713888	--	K13436 pto-interacting protein 1 [EC:2.7.11.1] | (RefSeq) pto-interacting protein 1-like (A)	ko04626: Plant-pathogen interaction	serine/threonine-protein kinase-like protein CCR4 [Chenopodium quinoa]	RecName: Full=Serine/threonine-protein kinase-like protein CCR4; EC=2.7.11.1; AltName: Full=CRINKLY 4-related kinase 1; Short=AtCRK1; AltName: Full=Protein CRINKLY 4 RELATED 4; Short=AtCCR4; Flags: Precursor;	SubName: Full=Uncharacterized protein {ECO:0000313|EMBL:KNA23672.1};	Serine/threonine protein kinase	GO:0016021,integral component of membrane; GO:0005524,ATP binding; GO:0042803,protein homodimerization activity; GO:0004672,protein kinase activity; GO:0004674,protein serine/threonine kinase activity	PF00069.25:Protein kinase domain
gene-LOC110713890	1.81	1.84	0.92	3.65	6.64	11.92	172	166	72	217	586	992	2.37117	2.84507e-05	0.00669858	up	NW_018745454.1	5108618	5120079	-	LOC110713890	--	K05643 ATP-binding cassette, subfamily A (ABC1), member 3 | (RefSeq) ABC transporter A family member 1-like isoform X1 (A)	ko02010: ABC transporters	ABC transporter G family member 34-like isoform X1 [Chenopodium quinoa]	RecName: Full=ABC transporter G family member 34; Short=ABC transporter ABCG.34; Short=AtABCG34; AltName: Full=Pleiotropic drug resistance protein 6;	SubName: Full=pleiotropic drug resistance protein 2 {ECO:0000313|RefSeq:XP_018839779.1};	Pleiotropic drug resistance proteins (PDR1-15), ABC superfamily	GO:0016021,integral component of membrane; GO:0005886,plasma membrane; GO:0005524,ATP binding; GO:0042626,ATPase activity, coupled to transmembrane movement of substances	PF01061.24:ABC-2 type transporter
gene-LOC110714429	6.32	5.01	4.65	8.27	22.89	21.81	348	263	210	285	1171	1053	1.81727	0.000169788	0.0236422	up	NW_018745454.1	3843830	3847197	+	LOC110714429	--	K12158 ubiquitin-like protein Nedd8 | (RefSeq) ubiquitin-NEDD8-like protein RUB2 (A)	--	phosphatidylinositol 4-kinase gamma 4-like [Chenopodium quinoa]	RecName: Full=Phosphatidylinositol 4-kinase gamma 4; Short=AtPI4Kgamma4; Short=PI-4Kgamma4; Short=PI4K gamma 4; EC=2.7.1.67; AltName: Full=Ubiquitin-like domain kinase gamma 4; Short=UbDK gamma 4;	SubName: Full=Uncharacterized protein {ECO:0000313|EMBL:KNA18162.1};	Phosphatidylinositol 4-kinase	GO:0005829,cytosol; GO:0016020,membrane; GO:0004430,1-phosphatidylinositol 4-kinase activity; GO:0005524,ATP binding; GO:0004674,protein serine/threonine kinase activity; GO:0046854,phosphatidylinositol phosphorylation; GO:0046777,protein autophosphorylation; GO:0009651,response to salt stress	PF00454.27:Phosphatidylinositol 3- and 4-kinase
gene-LOC110714466	16.34	13.21	16.76	1.2	2.75	1.85	282	217	237	13	44	28	-2.88561	6.89449e-07	0.000365126	down	NW_018745454.1	6510083	6513100	-	LOC110714466	--	K11088 small nuclear ribonucleoprotein D3 | (RefSeq) small nuclear ribonucleoprotein SmD3b-like (A)	ko03040: Spliceosome	small nuclear ribonucleoprotein SmD3b-like [Chenopodium quinoa]	RecName: Full=Small nuclear ribonucleoprotein SmD3b {ECO:0000305}; Short=SmD3-b {ECO:0000303|PubMed:21421416}; AltName: Full=snRNP core protein D3-b {ECO:0000305};	SubName: Full=Uncharacterized protein {ECO:0000313|EMBL:KNA18151.1};	Small nuclear ribonucleoprotein Sm D3	GO:0071013,catalytic step 2 spliceosome; GO:0000243,commitment complex; GO:0005829,cytosol; GO:0005730,nucleolus; GO:0034715,pICln-Sm protein complex; GO:0071011,precatalytic spliceosome; GO:0071010,prespliceosome; GO:0034719,SMN-Sm protein complex; GO:0097526,spliceosomal tri-snRNP complex; GO:0005685,U1 snRNP; GO:0005689,U12-type spliceosomal complex; GO:0005686,U2 snRNP; GO:0005687,U4 snRNP; G…	PF01423.22:LSM domain
gene-LOC110714529	94.13	95.44	41.98	10.71	28.41	19.5	2979	2876	1089	212	835	541	-1.85606	0.000317472	0.0343957	down	NW_018745454.1	6894223	6895937	-	LOC110714529	--	K05278 flavonol synthase [EC:1.14.20.6] | (RefSeq) flavonol synthase/flavanone 3-hydroxylase-like (A)	ko00941: Flavonoid biosynthesis	flavonol synthase/flavanone 3-hydroxylase-like [Chenopodium quinoa]	RecName: Full=Flavonol synthase/flavanone 3-hydroxylase; Short=FLS; EC=1.14.11.23 {ECO:0000250|UniProtKB:Q7XZQ6}; EC=1.14.11.9 {ECO:0000250|UniProtKB:Q7XZQ6};	SubName: Full=Uncharacterized protein {ECO:0000313|EMBL:KNA06651.1};	Iron/ascorbate family oxidoreductases	GO:0005737,cytoplasm; GO:0045431,flavonol synthase activity; GO:0031418,L-ascorbic acid binding; GO:0046872,metal ion binding; GO:0045486,naringenin 3-dioxygenase activity	PF03171.20:2OG-Fe(II) oxygenase superfamily
gene-LOC110714652	2.21	1.9	2.18	11.21	23.23	23.9	137	112	111	435	1339	1300	3.30354	1.26971e-15	1.36727e-11	up	NW_018745454.1	6233862	6236875	-	LOC110714652	--	K13416 brassinosteroid insensitive 1-associated receptor kinase 1 [EC:2.7.10.1 2.7.11.1] | (RefSeq) BRASSINOSTEROID INSENSITIVE 1-associated receptor kinase 1-like (A)	ko04016: MAPK signaling pathway - plant; ko04075: Plant hormone signal transduction; ko04626: Plant-pathogen interaction	G-type lectin S-receptor-like serine/threonine-protein kinase At1g34300 [Chenopodium quinoa]	RecName: Full=G-type lectin S-receptor-like serine/threonine-protein kinase At1g34300; EC=2.7.11.1; Flags: Precursor;	RecName: Full=Protein DETOXIFICATION {ECO:0000256|RuleBase:RU004914}; AltName: Full=Multidrug and toxic compound extrusion protein {ECO:0000256|RuleBase:RU004914};	--	GO:0016021,integral component of membrane; GO:0005886,plasma membrane; GO:0005524,ATP binding; GO:0005516,calmodulin binding; GO:0030246,carbohydrate binding; GO:0004674,protein serine/threonine kinase activity; GO:0006468,protein phosphorylation; GO:0048544,recognition of pollen	PF00069.25:Protein kinase domain
gene-LOC110714763	2.23	2.65	1.78	4.55	7.06	6.26	172	195	113	220	506	424	1.54839	5.13018e-05	0.0103394	up	NW_018745461.1	565946	572026	+	LOC110714763	--	--	--	serine/arginine repetitive matrix protein 2-like [Chenopodium quinoa]	RecName: Full=Polyadenylate-binding protein-interacting protein 11; Short=PABP-interacting protein 11; Short=Poly(A)-binding protein-interacting protein 11; AltName: Full=PAM2-containing protein CID11; AltName: Full=Protein CTC-INTERACTING DOMAIN 11;	SubName: Full=Uncharacterized protein {ECO:0000313|EMBL:KNA03175.1};	--	GO:0005634,nucleus; GO:0003723,RNA binding	PF00630.19:Filamin/ABP280 repeat
gene-LOC110715099	173.02	166.75	213.31	581.72	601.41	906.29	2077	1906	2099	4368	6704	9536	2.01744	4.48483e-10	5.5724e-07	up	NW_018745470.1	1762333	1763623	+	LOC110715099	--	--	--	--	--	--	--	--	--
gene-LOC110715233	28.62	34.83	47.53	3.99	8.66	5.69	459	532	625	40	129	80	-2.50217	2.72924e-06	0.00117558	down	NW_018745485.1	1619981	1624173	+	LOC110715233	--	K17411 small subunit ribosomal protein S33 | (RefSeq) uncharacterized protein LOC110715233 (A)	--	uncharacterized protein LOC110715233 [Chenopodium quinoa]	--	SubName: Full=Mitochondrial isoform 1 {ECO:0000313|EMBL:EOY21169.1};	Mitochondrial ribosomal protein S27	--	PF08293.11:Mitochondrial ribosomal subunit S27
gene-LOC110715264	10.12	10.1	10.22	41.89	37.96	59.45	408	388	338	1057	1422	2102	2.31015	1.65996e-13	8.93748e-10	up	NW_018745521.1	186122	189833	+	LOC110715264	--	--	--	uncharacterized protein LOC110715264 [Chenopodium quinoa]	--	SubName: Full=Uncharacterized protein {ECO:0000313|EMBL:KNA14247.1};	--	--	PF04720.12:PDDEXK-like family of unknown function
gene-LOC110715297	7.69	8.16	8.38	13.1	19.37	23.33	290	293	259	309	678	771	1.30252	0.000164015	0.0229373	up	NW_018745521.1	158172	161269	-	LOC110715297	--	K13430 serine/threonine-protein kinase PBS1 [EC:2.7.11.1] | (RefSeq) probable serine/threonine-protein kinase PBL7 (A)	ko04626: Plant-pathogen interaction	receptor-like cytoplasmic kinase 176 [Chenopodium quinoa]	RecName: Full=Receptor-like cytoplasmic kinase 176 {ECO:0000303|PubMed:19825577}; Short=OsRLCK176 {ECO:0000303|PubMed:19825577}; EC=2.7.11.1 {ECO:0000305};	SubName: Full=Uncharacterized protein {ECO:0000313|EMBL:KNA09052.1};	Serine/threonine protein kinase	GO:0005886,plasma membrane; GO:0005524,ATP binding; GO:0004675,transmembrane receptor protein serine/threonine kinase activity; GO:0007166,cell surface receptor signaling pathway; GO:0045087,innate immune response; GO:0006468,protein phosphorylation	PF00069.25:Protein kinase domain
gene-LOC110715533	56.38	62.98	35.37	141.39	120.8	204.65	1083	1152	557	1699	2155	3446	1.7273	3.06746e-06	0.00127044	up	NW_018745523.1	3119816	3120964	-	LOC110715533	--	--	--	uncharacterized protein LOC110715533 [Chenopodium quinoa]	--	SubName: Full=Uncharacterized protein {ECO:0000313|EMBL:KNA21688.1};	Nuclear localization sequence binding protein	--	--
gene-LOC110715589	7.25	7.07	5.86	24.8	14.13	17.75	436	405	289	933	789	936	1.66067	0.000178424	0.0242598	up	NW_018745523.1	3442408	3446702	+	LOC110715589	--	--	--	protein CHUP1, chloroplastic-like isoform X1 [Chenopodium quinoa]	RecName: Full=Protein CHUP1, chloroplastic; AltName: Full=Protein CHLOROPLAST UNUSUAL POSITIONING 1;	SubName: Full=Uncharacterized protein {ECO:0000313|EMBL:KNA16301.1};	--	GO:0009507,chloroplast; GO:0009707,chloroplast outer membrane; GO:0009902,chloroplast relocation	--
gene-LOC110715674	5.7	5.72	3.91	17.73	21.54	52.92	436	417	245	849	1531	3550	2.67289	6.26084e-08	4.49459e-05	up	NW_018745523.1	3470251	3490168	-	LOC110715674	--	K13430 serine/threonine-protein kinase PBS1 [EC:2.7.11.1] | (RefSeq) probable serine/threonine-protein kinase PBL7 (A)	ko04626: Plant-pathogen interaction	putative leucine-rich repeat receptor-like serine/threonine-protein kinase At2g19230 isoform X1 [Chenopodium quinoa]	RecName: Full=Putative leucine-rich repeat receptor-like serine/threonine-protein kinase At2g19230; EC=2.7.11.1; Flags: Precursor;	SubName: Full=Uncharacterized protein {ECO:0000313|EMBL:GAY56427.1};	--	GO:0016021,integral component of membrane; GO:0005886,plasma membrane; GO:0005524,ATP binding; GO:0004674,protein serine/threonine kinase activity	PF12819.7:Malectin-like domain
gene-LOC110715688	123.27	123.85	120.28	172.27	335.69	393.34	8739	8360	6990	7639	22099	24442	1.38178	6.02353e-05	0.0117223	up	NW_018745523.1	626256	633186	-	LOC110715688	--	K00281 glycine dehydrogenase [EC:1.4.4.2] | (RefSeq) glycine dehydrogenase (decarboxylating), mitochondrial-like (A)	ko00260: Glycine, serine and threonine metabolism; ko00630: Glyoxylate and dicarboxylate metabolism; ko01200: Carbon metabolism	glycine dehydrogenase (decarboxylating), mitochondrial-like [Chenopodium quinoa]	RecName: Full=Glycine dehydrogenase (decarboxylating), mitochondrial; EC=1.4.4.2; AltName: Full=Glycine cleavage system P protein; AltName: Full=Glycine decarboxylase; AltName: Full=Glycine dehydrogenase (aminomethyl-transferring); Flags: Precursor;	RecName: Full=Glycine cleavage system P protein {ECO:0000256|RuleBase:RU364056}; EC=1.4.4.2 {ECO:0000256|RuleBase:RU364056};	Glycine dehydrogenase (decarboxylating)	GO:0005739,mitochondrion; GO:0004375,glycine dehydrogenase (decarboxylating) activity; GO:0006546,glycine catabolic process	PF02347.16:Glycine cleavage system P-protein
gene-LOC110716292	32.55	28.33	19.46	7.26	7.19	7.1	502	416	246	70	103	96	-1.74926	4.56522e-05	0.00953201	down	NW_018745569.1	111226	117489	-	LOC110716292	--	K15171 transcription elongation factor SPT4 | (RefSeq) transcription elongation factor SPT4 homolog 2-like (A)	--	transcription elongation factor SPT4 homolog 2-like [Chenopodium quinoa]	RecName: Full=Transcription elongation factor SPT4 homolog 2;	RecName: Full=Transcription elongation factor SPT4 homolog {ECO:0000256|PIRNR:PIRNR025023};	Transcription elongation factor SPT4	GO:0032044,DSIF complex; GO:0003700,DNA-binding transcription factor activity; GO:0000993,RNA polymerase II complex binding; GO:0003727,single-stranded RNA binding; GO:0008270,zinc ion binding; GO:0006325,chromatin organization; GO:0006397,mRNA processing; GO:0032786,positive regulation of DNA-templated transcription, elongation; GO:0034243,regulation of transcription elongation from RNA polymera…	PF06093.13:Spt4/RpoE2 zinc finger
gene-LOC110716330	22.93	22.91	13.37	28.52	55.54	72.47	1297	1234	620	1009	2917	3593	1.50283	0.000398732	0.0403794	up	NW_018742441.1	625193	639641	-	LOC110716330	--	--	--	protein LNK2-like [Chenopodium quinoa]	RecName: Full=Protein LNK2 {ECO:0000303|PubMed:23818596}; AltName: Full=Night light-inducible and clock-regulated 2 {ECO:0000303|PubMed:23818596};	SubName: Full=Uncharacterized protein {ECO:0000313|EMBL:KNA11738.1}; Flags: Fragment;	--	GO:0005634,nucleus; GO:0006355,regulation of transcription, DNA-templated; GO:0048511,rhythmic process; GO:0006351,transcription, DNA-templated	--
gene-LOC110716843	6.19	5.88	3.78	6.31	38.46	49.55	146	132	73	93	842	1024	2.63256	0.000526212	0.0495605	up	NW_018745650.1	2857705	2859177	-	LOC110716843	--	K01183 chitinase [EC:3.2.1.14] | (RefSeq) endochitinase EP3-like (A)	ko00520: Amino sugar and nucleotide sugar metabolism	endochitinase EP3-like [Chenopodium quinoa]	RecName: Full=Endochitinase EP3 {ECO:0000303|PubMed:11525512}; EC=3.2.1.14; AltName: Full=Chitinase class IV {ECO:0000303|PubMed:11525512}; Short=AtchitIV {ECO:0000303|PubMed:11525512}; AltName: Full=Protein HOMOLOG OF CARROT EP3-3 CHITINASE {ECO:0000303|PubMed:11525512}; Short=AtEP3 {ECO:0000303|PubMed:11525512}; Flags: Precursor;	SubName: Full=Chitinase {ECO:0000313|EMBL:BAA22966.1};	Predicted chitinase	GO:0005618,cell wall; GO:0008061,chitin binding; GO:0004568,chitinase activity; GO:0016998,cell wall macromolecule catabolic process; GO:0006032,chitin catabolic process; GO:0006952,defense response; GO:0000272,polysaccharide catabolic process; GO:0009617,response to bacterium; GO:0009611,response to wounding; GO:0010262,somatic embryogenesis	PF00182.19:Chitinase class I
gene-LOC110717432	22.29	22.59	22.89	6.7	9.35	12.07	893	862	752	168	348	424	-1.16786	0.000361547	0.0374352	down	NW_018745684.1	9055073	9059304	-	LOC110717432	--	K01648 ATP citrate (pro-S)-lyase [EC:2.3.3.8] | (RefSeq) ATP-citrate synthase alpha chain protein 2-like (A)	ko00020: Citrate cycle (TCA cycle)	ATP-citrate synthase alpha chain protein 2-like [Chenopodium quinoa]	RecName: Full=ATP-citrate synthase alpha chain protein 2; Short=ATP-citrate synthase A-2; EC=2.3.3.8; AltName: Full=ATP-citrate lyase A-2; AltName: Full=Citrate cleavage enzyme A-2;	SubName: Full=Uncharacterized protein {ECO:0000313|EMBL:KNA08857.1};	ATP-citrate lyase	GO:0009346,citrate lyase complex; GO:0005829,cytosol; GO:0005524,ATP binding; GO:0003878,ATP citrate synthase activity; GO:0006085,acetyl-CoA biosynthetic process; GO:0006633,fatty acid biosynthetic process	PF16114.5:ATP citrate lyase citrate-binding
gene-LOC110717756	5.54	4.31	7.75	13.48	19.81	29.91	192	142	220	292	637	908	1.91469	0.000128681	0.0197954	up	NW_018745684.1	2203232	2205421	+	LOC110717756	--	K06892 feruloyl-CoA 6-hydroxylase [EC:1.14.11.61] | (RefSeq) feruloyl CoA ortho-hydroxylase 2-like (A)	ko00940: Phenylpropanoid biosynthesis	deacetoxyvindoline 4-hydroxylase-like [Chenopodium quinoa]	RecName: Full=Deacetoxyvindoline 4-hydroxylase {ECO:0000303|PubMed:9290645}; EC=1.14.11.20 {ECO:0000269|PubMed:8449913, ECO:0000269|PubMed:9290645};	SubName: Full=Uncharacterized protein {ECO:0000313|EMBL:KNA12364.1}; Flags: Fragment;	Iron/ascorbate family oxidoreductases	GO:0005737,cytoplasm; GO:0005634,nucleus; GO:0050590,desacetoxyvindoline 4-hydroxylase activity; GO:0031418,L-ascorbic acid binding; GO:0046872,metal ion binding; GO:0009820,alkaloid metabolic process	PF03171.20:2OG-Fe(II) oxygenase superfamily
gene-LOC110717909	64.97	55.36	5.11	3.03	6.17	2.89	1644	1334	106	48	145	64	-3.1942	0.000443343	0.0434005	down	NW_018745684.1	6197798	6199026	-	LOC110717909	--	--	--	uncharacterized protein LOC110717909 [Chenopodium quinoa]	--	SubName: Full=Uncharacterized protein {ECO:0000313|EMBL:KNA03820.1};	--	GO:0016021,integral component of membrane	--
gene-LOC110718181	14.13	10.53	15.99	64.83	33.19	45.84	344	244	319	987	750	978	1.97904	0.000111552	0.0179287	up	NW_018745684.1	466304	467485	+	LOC110718181	--	K09286 EREBP-like factor | (RefSeq) ethylene-responsive transcription factor ERF071-like (A)	--	ethylene-responsive transcription factor RAP2-6-like [Chenopodium quinoa]	RecName: Full=Ethylene-responsive transcription factor ERF114 {ECO:0000303|PubMed:16407444}; AltName: Full=ERF bud enhancer {ECO:0000303|PubMed:23616605};	SubName: Full=Uncharacterized protein {ECO:0000313|EMBL:KNA22948.1};	--	GO:0005634,nucleus; GO:0003700,DNA-binding transcription factor activity; GO:0043565,sequence-specific DNA binding; GO:0050832,defense response to fungus; GO:0009873,ethylene-activated signaling pathway; GO:0007275,multicellular organism development; GO:0006351,transcription, DNA-templated	PF00847.20:AP2 domain
gene-LOC110718312	3.04	2.63	8.09	20.93	20.17	38.55	119	98	260	513	734	1324	2.58867	8.93311e-05	0.0153502	up	NW_018745684.1	2510215	2512195	+	LOC110718312	--	--	--	--	--	--	--	--	--
gene-LOC110718715	19.77	22.38	19.21	51.68	39.68	55.27	1361	1467	1084	2226	2537	3336	1.39575	6.20739e-06	0.00219912	up	NW_018742461.1	2614184	2629797	-	LOC110718715	--	K20715 phototropin [EC:2.7.11.1] | (RefSeq) phototropin-2-like (A)	--	phototropin-2-like [Chenopodium quinoa]	RecName: Full=Phototropin-2; EC=2.7.11.1; AltName: Full=Defective in chloroplast avoidance protein 1; AltName: Full=Non-phototropic hypocotyl 1-like protein 1; Short=AtKin7; Short=NPH1-like protein 1;	SubName: Full=Putative LOV domain-containing protein {ECO:0000313|EMBL:AML77733.1};	--	GO:0005794,Golgi apparatus; GO:0016020,membrane; GO:0005634,nucleus; GO:0005886,plasma membrane; GO:0005524,ATP binding; GO:0009882,blue light photoreceptor activity; GO:0010181,FMN binding; GO:0042802,identical protein binding; GO:0016301,kinase activity; GO:0000155,phosphorelay sensor kinase activity; GO:0004674,protein serine/threonine kinase activity; GO:0009902,chloroplast relocation; GO:000…	PF00069.25:Protein kinase domain
gene-LOC110718913	0.2	0.06	0	3.4	3.47	4.96	7	2	0	74	112	151	5.62351	1.12595e-06	0.000542895	up	NW_018742461.1	4852405	4854809	+	LOC110718913	--	--	--	--	--	--	--	--	--
gene-LOC110719340	2.5	2.28	2.55	9.81	22.79	42.56	128	111	107	314	1083	1909	3.41054	2.62311e-09	2.49234e-06	up	NW_018742484.1	1404053	1407765	+	LOC110719340	--	K09843 (+)-abscisic acid 8'-hydroxylase [EC:1.14.14.137] | (RefSeq) abscisic acid 8'-hydroxylase 1-like (A)	ko00906: Carotenoid biosynthesis	abscisic acid 8'-hydroxylase 1-like [Chenopodium quinoa]	RecName: Full=Abscisic acid 8'-hydroxylase 1; Short=ABA 8'-hydroxylase 1; EC=1.14.13.93; AltName: Full=Cytochrome P450 707A1;	SubName: Full=Uncharacterized protein {ECO:0000313|EMBL:KNA20889.1};	Cytochrome P450 CYP4/CYP19/CYP26 subfamilies	GO:0016021,integral component of membrane; GO:0010295,(+)-abscisic acid 8'-hydroxylase activity; GO:0020037,heme binding; GO:0005506,iron ion binding; GO:0046345,abscisic acid catabolic process; GO:0016132,brassinosteroid biosynthetic process; GO:0010268,brassinosteroid homeostasis; GO:0016125,sterol metabolic process	PF00067.22:Cytochrome P450
gene-LOC110719473	11.75	11.35	5	13.91	75.95	176.38	235	216	82	174	1410	3091	3.29275	8.22489e-05	0.0146172	up	NW_018742484.1	4417621	4418591	+	LOC110719473	--	--	--	osmotin-like protein OSML13 [Chenopodium quinoa]	RecName: Full=Osmotin-like protein OSML81; AltName: Full=PA81; Flags: Precursor;	SubName: Full=Uncharacterized protein {ECO:0000313|EMBL:KNA04278.1};	--	--	PF00314.17:Thaumatin family
gene-LOC110719691	44.37	43.14	30.66	14.26	16.26	16.15	1363	1262	772	274	464	435	-1.20059	4.76438e-05	0.0098034	down	NW_018742484.1	7882263	7887650	-	LOC110719691	--	K05610 ubiquitin carboxyl-terminal hydrolase L5 [EC:3.4.19.12] | (RefSeq) ubiquitin carboxyl-terminal hydrolase 2-like (A)	--	ubiquitin carboxyl-terminal hydrolase 2-like [Chenopodium quinoa]	RecName: Full=Ubiquitin carboxyl-terminal hydrolase 2 {ECO:0000303|PubMed:17559514}; EC=3.4.19.12 {ECO:0000305};	RecName: Full=Ubiquitin carboxyl-terminal hydrolase {ECO:0000256|PIRNR:PIRNR038120}; EC=3.4.19.12 {ECO:0000256|PIRNR:PIRNR038120};	Ubiquitin C-terminal hydrolase	GO:0005737,cytoplasm; GO:0005634,nucleus; GO:0004843,thiol-dependent ubiquitin-specific protease activity; GO:0016579,protein deubiquitination; GO:0010016,shoot system morphogenesis; GO:0006511,ubiquitin-dependent protein catabolic process	PF01088.21:Ubiquitin carboxyl-terminal hydrolase, family 1
gene-LOC110719714	8.43	8.82	25.86	50.23	76.25	81.57	291	290	732	1085	2445	2469	2.32813	0.000183644	0.024515	up	NW_018742484.1	8101382	8104355	-	LOC110719714	--	--	--	B2 protein-like [Chenopodium quinoa]	RecName: Full=B2 protein;	SubName: Full=Uncharacterized protein {ECO:0000313|EMBL:KNA24030.1};	--	--	PF10539.9:Development and cell death domain
gene-LOC110719865	48.1	52.57	34.91	11.59	17.9	16.37	1227	1277	730	185	424	366	-1.43685	1.10598e-05	0.00325697	down	NW_018742493.1	431779	433683	-	LOC110719865	--	--	--	--	--	--	--	--	--
gene-LOC110719883	15.75	18.07	11.43	24.58	40.83	38.87	627	685	373	612	1509	1356	1.3245	8.4183e-05	0.0147002	up	NW_018742204.1	15781574	15784614	-	LOC110719883	--	K14491 two-component response regulator ARR-B family | (RefSeq) two-component response regulator ARR2-like isoform X1 (A)	ko04075: Plant hormone signal transduction	transcription factor HHO3-like [Chenopodium quinoa]	RecName: Full=Transcription factor HHO2 {ECO:0000305}; AltName: Full=MYB-domain transcription factor HHO2 {ECO:0000305}; AltName: Full=Protein HRS1 HOMOLOG 2 {ECO:0000303|PubMed:27016098};	SubName: Full=Uncharacterized protein {ECO:0000313|EMBL:KMS97374.1};	--	GO:0005634,nucleus; GO:0003677,DNA binding; GO:0003700,DNA-binding transcription factor activity; GO:0055062,phosphate ion homeostasis; GO:0006355,regulation of transcription, DNA-templated; GO:0009737,response to abscisic acid; GO:0006351,transcription, DNA-templated	PF00249.31:Myb-like DNA-binding domain
gene-LOC110719952	18.63	14.7	13.63	37.2	26.8	37.58	1394	1047	836	1741	1862	2465	1.26037	0.00025355	0.0301615	up	NW_018742523.1	875094	911279	-	LOC110719952	--	K01006 pyruvate, orthophosphate dikinase [EC:2.7.9.1] | (RefSeq) pyruvate, phosphate dikinase, chloroplastic (A)	ko00010: Glycolysis / Gluconeogenesis; ko00620: Pyruvate metabolism; ko00710: Carbon fixation in photosynthetic organisms; ko01200: Carbon metabolism	pyruvate, phosphate dikinase, chloroplastic [Chenopodium quinoa]	RecName: Full=Pyruvate, phosphate dikinase, chloroplastic; EC=2.7.9.1 {ECO:0000250|UniProtKB:P11155}; AltName: Full=Pyruvate, orthophosphate dikinase; Flags: Precursor;	RecName: Full=Pyruvate, phosphate dikinase {ECO:0000256|PIRNR:PIRNR000853}; EC=2.7.9.1 {ECO:0000256|PIRNR:PIRNR000853};	--	GO:0009507,chloroplast; GO:0005524,ATP binding; GO:0016301,kinase activity; GO:0046872,metal ion binding; GO:0050242,pyruvate, phosphate dikinase activity; GO:0015979,photosynthesis; GO:0006090,pyruvate metabolic process	PF02896.18:PEP-utilising enzyme, TIM barrel domain
gene-LOC110720095	3.6	3.77	2.77	5.08	16.07	15.15	230	229	145	203	953	848	1.92701	0.000277249	0.0318134	up	NW_018742541.1	28658	42466	-	LOC110720095	--	K14494 DELLA protein | (RefSeq) DELLA protein GAI1-like (A)	ko04075: Plant hormone signal transduction	chitin-inducible gibberellin-responsive protein 1-like [Chenopodium quinoa]	RecName: Full=Chitin-inducible gibberellin-responsive protein 1;	SubName: Full=Uncharacterized protein {ECO:0000313|EMBL:KNA20000.1};	--	GO:0005634,nucleus; GO:0003700,DNA-binding transcription factor activity; GO:0043565,sequence-specific DNA binding; GO:0006355,regulation of transcription, DNA-templated; GO:0006351,transcription, DNA-templated	PF03514.14:GRAS domain family
gene-LOC110720111	4.53	3.91	3.17	8.16	7.65	9.23	401	330	230	452	629	716	1.24754	0.000118552	0.0186821	up	NW_018742541.1	629391	635810	+	LOC110720111	--	--	--	uncharacterized protein LOC110720111 isoform X1 [Chenopodium quinoa]	RecName: Full=COP1-interacting protein 7 {ECO:0000303|PubMed:9668129};	SubName: Full=Uncharacterized protein {ECO:0000313|EMBL:KNA16024.1};	--	GO:0005634,nucleus; GO:0005886,plasma membrane; GO:0009718,anthocyanin-containing compound biosynthetic process; GO:0015995,chlorophyll biosynthetic process; GO:0045893,positive regulation of transcription, DNA-templated; GO:0009416,response to light stimulus; GO:0006351,transcription, DNA-templated	--
gene-LOC110720234	2.1	1.54	1.29	5.48	3.72	5.9	165	115	83	269	271	406	1.76152	0.000216739	0.0269298	up	NW_018742204.1	16705574	16715229	+	LOC110720234	--	K01595 phosphoenolpyruvate carboxylase [EC:4.1.1.31] | (RefSeq) phosphoenolpyruvate carboxylase 4-like (A)	ko00620: Pyruvate metabolism; ko00710: Carbon fixation in photosynthetic organisms; ko01200: Carbon metabolism	phosphoenolpyruvate carboxylase 4-like [Chenopodium quinoa]	RecName: Full=Phosphoenolpyruvate carboxylase 4; Short=AtPPC4; Short=PEPC 4; Short=PEPCase 4; EC=4.1.1.31;	SubName: Full=Uncharacterized protein {ECO:0000313|EMBL:KNA22909.1};	--	GO:0005829,cytosol; GO:0008964,phosphoenolpyruvate carboxylase activity; GO:0015977,carbon fixation; GO:0015979,photosynthesis; GO:0006099,tricarboxylic acid cycle	PF00311.17:Phosphoenolpyruvate carboxylase
gene-LOC110721032	317.57	322.61	233.21	79.2	77.47	52.36	5231	5060	3149	816	1185	756	-1.89492	7.74299e-07	0.00039084	down	NW_018742577.1	3941090	3942764	+	LOC110721032	--	K11251 histone H2A | (RefSeq) histone H2A (A)	--	histone H2A [Vigna radiata var. radiata]	RecName: Full=Probable histone H2A.2;	RecName: Full=Histone H2A {ECO:0000256|RuleBase:RU003767};	Histone 2A	GO:0000786,nucleosome; GO:0005634,nucleus; GO:0003677,DNA binding; GO:0046982,protein heterodimerization activity	PF16211.5:C-terminus of histone H2A
gene-LOC110721413	0.25	0	0	2.95	3.52	7.45	6	0	0	44	78	156	5.89052	0.000280703	0.0318134	up	NW_018742616.1	263449	264608	-	LOC110721413	--	K13448 calcium-binding protein CML | (RefSeq) probable calcium-binding protein CML25 (A)	ko04626: Plant-pathogen interaction	calcium-binding protein CML24-like [Chenopodium quinoa]	RecName: Full=Probable calcium-binding protein CML25; AltName: Full=Calmodulin-like protein 25;	SubName: Full=Uncharacterized protein {ECO:0000313|EMBL:KNA06717.1};	Calmodulin and related proteins (EF-Hand superfamily)	GO:0005737,cytoplasm; GO:0005634,nucleus; GO:0005509,calcium ion binding; GO:0009409,response to cold; GO:0048767,root hair elongation	PF00036.32:EF hand
gene-LOC110721508	177.32	177.54	175.85	76.32	61.42	74.39	1716	1636	1395	462	552	631	-1.18412	0.000180431	0.0242821	down	NW_018742616.1	1214340	1214809	-	LOC110721508	--	K09481 protein transport protein SEC61 subunit beta | (RefSeq) protein transport protein Sec61 subunit beta-like (A)	ko03060: Protein export; ko04141: Protein processing in endoplasmic reticulum; ko04145: Phagosome	protein transport protein Sec61 subunit beta-like [Chenopodium quinoa]	RecName: Full=Protein transport protein Sec61 subunit beta;	RecName: Full=Protein transport protein Sec61 subunit beta {ECO:0000256|PIRNR:PIRNR006398};	Sec61 protein translocation complex, beta subunit	GO:0005789,endoplasmic reticulum membrane; GO:0031205,endoplasmic reticulum Sec complex; GO:0016021,integral component of membrane; GO:0005784,Sec61 translocon complex; GO:0005086,ARF guanyl-nucleotide exchange factor activity; GO:0031204,posttranslational protein targeting to membrane, translocation; GO:0006616,SRP-dependent cotranslational protein targeting to membrane, translocation	PF03911.16:Sec61beta family
gene-LOC110721809	1.69	1.41	1.28	4.23	3.14	4.41	176	139	109	275	303	402	1.57119	0.000190195	0.0251814	up	NW_018742630.1	1769895	1778948	+	LOC110721809	--	K14486 auxin response factor | (RefSeq) auxin response factor 5-like (A)	ko04075: Plant hormone signal transduction	auxin response factor 7-like isoform X2 [Chenopodium quinoa]	RecName: Full=Auxin response factor 19; AltName: Full=Auxin-responsive protein IAA22;	RecName: Full=Auxin response factor {ECO:0000256|RuleBase:RU004561};	--	GO:0005634,nucleus; GO:0003677,DNA binding; GO:0003700,DNA-binding transcription factor activity; GO:0046983,protein dimerization activity; GO:0043565,sequence-specific DNA binding; GO:0009734,auxin-activated signaling pathway; GO:0048527,lateral root development; GO:0010311,lateral root formation; GO:0048366,leaf development; GO:0009733,response to auxin; GO:0009723,response to ethylene; GO:0006…	PF02309.16:AUX/IAA family
gene-LOC110721899	0.16	0.04	0	0.87	1.73	2.5	8	2	0	28	82	112	4.79377	0.000415175	0.0410947	up	NW_018742630.1	3291989	3294473	-	LOC110721899	--	K08653 membrane-bound transcription factor site-1 protease [EC:3.4.21.112] | (RefSeq) LOW QUALITY PROTEIN: subtilisin-like protease SBT6.1 (A)	ko04141: Protein processing in endoplasmic reticulum	subtilisin-like protease SBT1.9 [Chenopodium quinoa]	RecName: Full=Subtilisin-like protease SBT1.9 {ECO:0000303|PubMed:16193095}; EC=3.4.21.- {ECO:0000255|PROSITE-ProRule:PRU10082}; AltName: Full=Subtilase subfamily 1 member 9 {ECO:0000303|PubMed:16193095}; Short=AtSBT1.9 {ECO:0000303|PubMed:16193095}; Flags: Precursor;	SubName: Full=Uncharacterized protein {ECO:0000313|EMBL:KNA17954.1};	--	GO:0005576,extracellular region; GO:0004252,serine-type endopeptidase activity; GO:0006508,proteolysis	PF00082.22:Subtilase family
gene-LOC110721931	43.35	40.4	23.87	92.96	119.93	142.11	1163	1032	525	1560	2988	3342	1.85124	2.4865e-08	1.91253e-05	up	NW_018742630.1	3744940	3747450	+	LOC110721931	--	--	--	tetraspanin-8-like [Chenopodium quinoa]	RecName: Full=Tetraspanin-8;	SubName: Full=Uncharacterized protein {ECO:0000313|EMBL:KNA17614.1};	--	GO:0005794,Golgi apparatus; GO:0016021,integral component of membrane; GO:0016020,membrane; GO:0005886,plasma membrane; GO:0009506,plasmodesma; GO:0050829,defense response to Gram-negative bacterium	PF00335.20:Tetraspanin family
gene-LOC110722241	13.48	14.32	23.82	1.21	0.89	2.33	357	361	517	20	22	54	-3.46728	4.95477e-08	3.63782e-05	down	NW_018742656.1	629185	649478	-	LOC110722241	--	K09264 MADS-box transcription factor, plant | (RefSeq) truncated transcription factor CAULIFLOWER A-like (A)	--	truncated transcription factor CAULIFLOWER A-like [Chenopodium quinoa]	RecName: Full=Agamous-like MADS-box protein AGL8 homolog; AltName: Full=POTM1-1;	SubName: Full=Uncharacterized protein {ECO:0000313|EMBL:KNA22806.1};	MADS box transcription factor	GO:0005634,nucleus; GO:0003700,DNA-binding transcription factor activity; GO:0046983,protein dimerization activity; GO:0000977,RNA polymerase II regulatory region sequence-specific DNA binding; GO:0045944,positive regulation of transcription by RNA polymerase II; GO:0006351,transcription, DNA-templated	PF01486.17:K-box region
gene-LOC110722303	37.44	35.51	19.57	88.36	85.5	109.98	1279	1155	548	1888	2712	3293	1.76264	6.4438e-07	0.000346945	up	NW_018742669.1	163213	165093	-	LOC110722303	--	K14497 protein phosphatase 2C [EC:3.1.3.16] | (RefSeq) protein phosphatase 2C 37-like (A)	ko04016: MAPK signaling pathway - plant; ko04075: Plant hormone signal transduction	protein phosphatase 2C 37-like [Chenopodium quinoa]	RecName: Full=Protein phosphatase 2C 37; Short=AtPP2C37; EC=3.1.3.16; AltName: Full=Protein ABA-HYPERSENSITIVE GERMINATION 3; AltName: Full=Protein phosphatase 2C A; Short=PP2CA;	SubName: Full=Protein phosphatase 2C {ECO:0000313|EMBL:CAC84141.2}; SubName: Full=protein phosphatase 2C 37-like {ECO:0000313|RefSeq:XP_016482340.1};	Serine/threonine protein phosphatase	GO:0005829,cytosol; GO:0005634,nucleus; GO:0046872,metal ion binding; GO:0004721,phosphoprotein phosphatase activity; GO:0019901,protein kinase binding; GO:0004722,protein serine/threonine phosphatase activity; GO:0009738,abscisic acid-activated signaling pathway; GO:0009788,negative regulation of abscisic acid-activated signaling pathway; GO:0010360,negative regulation of anion channel activity;…	PF00481.21:Protein phosphatase 2C
gene-LOC110722884	5.47	5.56	2.48	15.75	11.55	14.73	409	396	152	737	802	966	1.80792	0.000132672	0.0203127	up	NW_018742697.1	106824	112030	-	LOC110722884	--	K22048 mechanosensitive ion channel protein 4/5/6/7/8/9/10 | (RefSeq) mechanosensitive ion channel protein 6-like (A)	--	mechanosensitive ion channel protein 6-like [Chenopodium quinoa]	RecName: Full=Mechanosensitive ion channel protein 8 {ECO:0000303|Ref.4}; AltName: Full=Mechanosensitive channel of small conductance-like 8 {ECO:0000303|Ref.4}; AltName: Full=MscS-Like protein 8 {ECO:0000303|Ref.4};	SubName: Full=Uncharacterized protein {ECO:0000313|EMBL:KNA24576.1};	Predicted mechanosensitive ion channel	GO:0012505,endomembrane system; GO:0016021,integral component of membrane; GO:0005886,plasma membrane; GO:0006820,anion transport; GO:0055085,transmembrane transport	PF00924.18:Mechanosensitive ion channel
gene-LOC110723126	167.85	144.15	167.11	50.6	81.63	74.08	4296	3513	3506	810	1940	1662	-1.10826	0.000171642	0.0236961	down	NW_018742720.1	1557454	1558696	-	LOC110723126	--	K14504 xyloglucan:xyloglucosyl transferase TCH4 [EC:2.4.1.207] | (RefSeq) probable xyloglucan endotransglucosylase/hydrolase protein 23 (A)	ko04075: Plant hormone signal transduction	probable xyloglucan endotransglucosylase/hydrolase protein 23 [Chenopodium quinoa]	RecName: Full=Probable xyloglucan endotransglucosylase/hydrolase protein 23; Short=At-XTH23; Short=XTH-23; EC=2.4.1.207; Flags: Precursor;	RecName: Full=Xyloglucan endotransglucosylase/hydrolase {ECO:0000256|RuleBase:RU361120}; EC=2.4.1.207 {ECO:0000256|RuleBase:RU361120};	--	GO:0048046,apoplast; GO:0005618,cell wall; GO:0005794,Golgi apparatus; GO:0004553,hydrolase activity, hydrolyzing O-glycosyl compounds; GO:0016762,xyloglucan:xyloglucosyl transferase activity; GO:0042546,cell wall biogenesis; GO:0071555,cell wall organization; GO:0010411,xyloglucan metabolic process	PF00722.21:Glycosyl hydrolases family 16
gene-LOC110723291	2.25	2.22	2.28	11.29	9.11	9.85	194	182	161	609	729	744	2.31	5.01502e-10	6.00038e-07	up	NW_018742726.1	2232783	2240480	-	LOC110723291	--	--	--	--	--	--	--	--	--
gene-LOC110723306	0.14	0.55	0	5.99	7.83	15.89	5	18	0	130	252	483	5.55161	2.28026e-06	0.00102311	up	NW_018742726.1	2421482	2425034	-	LOC110723306	--	K22390 acid phosphatase type 7 | (RefSeq) purple acid phosphatase 2-like (A)	--	purple acid phosphatase 2-like [Chenopodium quinoa]	RecName: Full=Purple acid phosphatase 2; EC=3.1.3.2; AltName: Full=Manganese(II) purple acid phosphatase 2; Flags: Precursor;	RecName: Full=Purple acid phosphatase {ECO:0000256|RuleBase:RU361203}; EC=3.1.3.2 {ECO:0000256|RuleBase:RU361203};	Purple acid phosphatase	GO:0005576,extracellular region; GO:0003993,acid phosphatase activity; GO:0046872,metal ion binding	PF00149.28:Calcineurin-like phosphoesterase
gene-LOC110723380	20.13	22.74	15.58	2.56	7.31	5.22	730	785	463	58	246	166	-1.84598	0.000228458	0.0281692	down	NW_018742730.1	430501	433324	+	LOC110723380	--	K07213 copper chaperone | (RefSeq) copper transport protein ATX1-like (A)	--	heavy metal-associated isoprenylated plant protein 7-like [Chenopodium quinoa]	RecName: Full=Heavy metal-associated isoprenylated plant protein 7 {ECO:0000303|PubMed:21072340, ECO:0000303|PubMed:23368984}; Short=AtHIP07 {ECO:0000303|PubMed:21072340, ECO:0000303|PubMed:23368984}; AltName: Full=Farnesylated protein 3 {ECO:0000303|PubMed:8837031}; Short=AtFP3 {ECO:0000303|PubMed:8837031}; Flags: Precursor;	SubName: Full=Uncharacterized protein {ECO:0000313|EMBL:KNA12451.1};	Copper chaperone	GO:0005737,cytoplasm; GO:0005886,plasma membrane; GO:0046914,transition metal ion binding; GO:0046916,cellular transition metal ion homeostasis; GO:0030001,metal ion transport	PF00403.26:Heavy-metal-associated domain
gene-LOC110723517	0	0	0	3.11	1.23	0.99	0	0	0	56	33	25	8.21576	0.000116137	0.0183911	up	NW_018742733.1	1780368	1781976	-	LOC110723517	--	K17604 zinc finger SWIM domain-containing protein 3 | (RefSeq) protein FAR1-RELATED SEQUENCE 8-like (A)	--	protein FAR1-RELATED SEQUENCE 5-like [Chenopodium quinoa]	RecName: Full=Protein FAR1-RELATED SEQUENCE 5;	SubName: Full=FAR1; Zinc finger, SWIM-type {ECO:0000313|EMBL:ABN05718.1};	--	GO:0005634,nucleus; GO:0008270,zinc ion binding; GO:0006355,regulation of transcription, DNA-templated	PF10551.9:MULE transposase domain
gene-LOC110723691	3.69	2.65	3.29	0	0.15	0.23	108	74	79	0	4	6	-4.56349	7.7992e-05	0.0142346	down	NW_018742733.1	320480	322416	-	LOC110723691	--	--	--	uncharacterized protein LOC110723691 [Chenopodium quinoa]	--	SubName: Full=Uncharacterized protein {ECO:0000313|EMBL:KNA24099.1};	--	GO:0016021,integral component of membrane	PF05553.11:Cotton fibre expressed protein
gene-LOC110723925	0	0.01	0	1.32	0.14	0.34	0	1	0	70	11	25	7.27634	0.000463869	0.0447322	up	NW_018742733.1	3882053	3887209	+	LOC110723925	--	--	--	--	--	--	--	--	--
gene-LOC110724171	32.48	36.91	24.65	2.44	9.2	8.18	426	461	265	20	112	94	-2.15447	0.000493927	0.047311	down	NW_018742738.1	6785593	6786716	+	LOC110724171	--	--	--	--	--	--	--	--	--
gene-LOC110724509	3.64	3.58	3.71	10.04	8.49	9.6	551	516	460	950	1192	1272	1.50171	2.65373e-06	0.0011585	up	NW_018742770.1	3358737	3371655	+	LOC110724509	--	K23541 Ca2+/H+ antiporter, TMEM165/GDT1 family | (RefSeq) pentatricopeptide repeat-containing protein At4g21065-like (A)	--	uncharacterized protein LOC110724509 [Chenopodium quinoa]	RecName: Full=Pentatricopeptide repeat-containing protein At1g19720; AltName: Full=Protein DYW7;	SubName: Full=Mannose-binding lectin {ECO:0000313|EMBL:OMO87498.1};	FOG: PPR repeat	GO:0009507,chloroplast; GO:0005737,cytoplasm; GO:0043231,intracellular membrane-bounded organelle; GO:0005634,nucleus; GO:0004519,endonuclease activity; GO:0003723,RNA binding; GO:0008270,zinc ion binding; GO:0009451,RNA modification	PF01419.17:Jacalin-like lectin domain
gene-LOC110724838	8.3	10.33	7.62	18.18	21.81	36.97	319	378	240	437	778	1245	1.65241	1.82495e-05	0.00491291	up	NW_018742770.1	4210378	4213299	-	LOC110724838	--	--	--	RHOMBOID-like protein 9, chloroplastic [Chenopodium quinoa]	RecName: Full=RHOMBOID-like protein 9, chloroplastic {ECO:0000303|PubMed:17181860}; Short=AtRBL9 {ECO:0000303|PubMed:17181860}; EC=3.4.21.- {ECO:0000305}; Flags: Precursor;	SubName: Full=Uncharacterized protein {ECO:0000313|EMBL:KNA08550.1};	Rhomboid family proteins	GO:0031969,chloroplast membrane; GO:0016021,integral component of membrane; GO:0004252,serine-type endopeptidase activity	PF01694.22:Rhomboid family
gene-LOC110725171	4.35	3.42	5	9.09	17.39	19.39	175	131	165	229	650	684	1.92695	3.11284e-05	0.00713193	up	NW_018742810.1	526012	529697	+	LOC110725171	--	K13459 disease resistance protein RPS2 | (RefSeq) probable disease resistance protein At4g27220 isoform X1 (A)	ko04626: Plant-pathogen interaction	probable WRKY transcription factor 41 [Chenopodium quinoa]	RecName: Full=Probable WRKY transcription factor 41; AltName: Full=WRKY DNA-binding protein 41;	SubName: Full=Uncharacterized protein {ECO:0000313|EMBL:KNA14097.1};	--	GO:0005634,nucleus; GO:0003700,DNA-binding transcription factor activity; GO:0043565,sequence-specific DNA binding; GO:0006351,transcription, DNA-templated	PF03106.15:WRKY DNA -binding domain
gene-LOC110725236	7.01	5.52	5.39	10.08	14.4	20.84	268	201	169	241	511	698	1.43633	0.000330896	0.0351632	up	NW_018742810.1	1295213	1299235	+	LOC110725236	--	K09588 cytochrome P450 family 90 subfamily A polypeptide 1 [EC:1.14.-.-] | (RefSeq) cytochrome P450 90A1-like (A)	ko00905: Brassinosteroid biosynthesis	cytochrome P450 90A1-like [Chenopodium quinoa]	RecName: Full=Cytochrome P450 90A1; EC=1.14.-.-;	SubName: Full=Uncharacterized protein {ECO:0000313|EMBL:KNA06106.1};	Cytochrome P450 CYP4/CYP19/CYP26 subfamilies	GO:0016021,integral component of membrane; GO:0020037,heme binding; GO:0005506,iron ion binding; GO:0004497,monooxygenase activity; GO:0016705,oxidoreductase activity, acting on paired donors, with incorporation or reduction of molecular oxygen; GO:0048657,anther wall tapetum cell differentiation; GO:0016132,brassinosteroid biosynthetic process; GO:0010268,brassinosteroid homeostasis; GO:0010584,…	PF00067.22:Cytochrome P450
gene-LOC110725242	11.65	13.6	20.84	56.33	38.71	82.88	491	546	720	1485	1515	3062	2.04267	2.9108e-05	0.00676499	up	NW_018742810.1	1352038	1354944	-	LOC110725242	--	K15639 PHYB activation tagged suppressor 1 [EC:1.14.-.-] | (RefSeq) cytochrome P450 734A1-like (A)	ko00905: Brassinosteroid biosynthesis	cytochrome P450 CYP72A219-like [Chenopodium quinoa]	RecName: Full=Cytochrome P450 CYP72A219; EC=1.14.-.-; AltName: Full=Cytochrome P450 CYP72A129;	SubName: Full=Uncharacterized protein {ECO:0000313|EMBL:KNA04519.1};	Cytochrome P450 CYP4/CYP19/CYP26 subfamilies	GO:0016021,integral component of membrane; GO:0020037,heme binding; GO:0005506,iron ion binding; GO:0004497,monooxygenase activity; GO:0016705,oxidoreductase activity, acting on paired donors, with incorporation or reduction of molecular oxygen	PF00067.22:Cytochrome P450
gene-LOC110725244	13.48	16.38	27.67	73.49	81.6	209.89	571	661	961	1948	3211	7796	2.71081	1.80552e-06	0.00082151	up	NW_018742810.1	1356943	1359481	+	LOC110725244	--	K20667 beta-amyrin 28-monooxygenase [EC:1.14.14.126] | (RefSeq) beta-amyrin 28-oxidase-like (A)	--	beta-amyrin 28-oxidase-like [Chenopodium quinoa]	RecName: Full=Beta-amyrin 28-oxidase; EC=1.14.13.-; AltName: Full=Cytochrome P450 CYP716A52v2;	SubName: Full=Uncharacterized protein {ECO:0000313|EMBL:KNA13824.1};	Cytochrome P450 CYP4/CYP19/CYP26 subfamilies	GO:0016021,integral component of membrane; GO:0020037,heme binding; GO:0005506,iron ion binding; GO:0004497,monooxygenase activity; GO:0016705,oxidoreductase activity, acting on paired donors, with incorporation or reduction of molecular oxygen	PF00067.22:Cytochrome P450
gene-LOC110725245	2.56	1.28	0	17.45	31.19	60	61	29	0	260	690	1253	4.94488	6.91625e-05	0.0128408	up	NW_018742810.1	1361920	1363335	-	LOC110725245	--	K00227 Delta7-sterol 5-desaturase [EC:1.14.19.20] | (RefSeq) delta(7)-sterol-C5(6)-desaturase-like (A)	ko00100: Steroid biosynthesis	delta(7)-sterol-C5(6)-desaturase-like [Chenopodium quinoa]	RecName: Full=Delta(7)-sterol-C5(6)-desaturase; EC=1.14.19.20; AltName: Full=Delta(7)-sterol-C5-desaturase; AltName: Full=Delta-7-C-5 sterol desaturase;	SubName: Full=Uncharacterized protein {ECO:0000313|EMBL:KNA04521.1};	Sterol C5 desaturase	GO:0005789,endoplasmic reticulum membrane; GO:0016021,integral component of membrane; GO:0005506,iron ion binding; GO:0016491,oxidoreductase activity; GO:0016126,sterol biosynthetic process	PF04116.13:Fatty acid hydroxylase superfamily
gene-LOC110725246	96.9	113.63	261.53	701.51	372.69	972.7	2899	3237	6414	13128	10354	25508	2.19723	0.000359863	0.0373806	up	NW_018742810.1	1369188	1371179	+	LOC110725246	--	K05278 flavonol synthase [EC:1.14.20.6] | (RefSeq) flavonol synthase/flavanone 3-hydroxylase-like (A)	ko00941: Flavonoid biosynthesis	probable 2-oxoglutarate-dependent dioxygenase ANS [Chenopodium quinoa]	RecName: Full=Probable 2-oxoglutarate-dependent dioxygenase ANS {ECO:0000305}; EC=1.14.11.- {ECO:0000305}; AltName: Full=Anthocyanidin synthase {ECO:0000305};	SubName: Full=Salt-induced protein {ECO:0000313|EMBL:BAC77696.1};	Iron/ascorbate family oxidoreductases	GO:0005829,cytosol; GO:0051213,dioxygenase activity; GO:0120091,jasmonic acid hydrolase; GO:0046872,metal ion binding; GO:0009813,flavonoid biosynthetic process; GO:2000022,regulation of jasmonic acid mediated signaling pathway	PF14226.6:non-haem dioxygenase in morphine synthesis N-terminal
gene-LOC110725247	19.87	22.01	26.87	65.91	49.32	150.93	747	788	828	1550	1722	4974	2.02777	7.68201e-05	0.0141004	up	NW_018742810.1	1385566	1387593	+	LOC110725247	--	K20667 beta-amyrin 28-monooxygenase [EC:1.14.14.126] | (RefSeq) beta-amyrin 28-oxidase-like isoform X1 (A)	--	beta-amyrin 28-oxidase-like isoform X1 [Chenopodium quinoa]	RecName: Full=Beta-amyrin 28-oxidase; EC=1.14.13.-; AltName: Full=Cytochrome P450 CYP716A52v2;	SubName: Full=Cytochrome P450 {ECO:0000313|EMBL:ANY30855.1};	Cytochrome P450 CYP4/CYP19/CYP26 subfamilies	GO:0016021,integral component of membrane; GO:0020037,heme binding; GO:0005506,iron ion binding; GO:0004497,monooxygenase activity; GO:0016705,oxidoreductase activity, acting on paired donors, with incorporation or reduction of molecular oxygen	PF00067.22:Cytochrome P450
gene-LOC110725248	16.15	16.5	24.88	63.85	42.25	99.19	704	685	889	1741	1710	3790	1.92926	5.7008e-05	0.0112984	up	NW_018742810.1	1388300	1390951	+	LOC110725248	--	K20667 beta-amyrin 28-monooxygenase [EC:1.14.14.126] | (RefSeq) beta-amyrin 28-oxidase-like (A)	--	beta-amyrin 28-oxidase-like [Chenopodium quinoa]	RecName: Full=Beta-amyrin 28-oxidase; EC=1.14.13.-; AltName: Full=Cytochrome P450 CYP716A52v2;	SubName: Full=Uncharacterized protein {ECO:0000313|EMBL:KNA13824.1};	Cytochrome P450 CYP4/CYP19/CYP26 subfamilies	GO:0016021,integral component of membrane; GO:0020037,heme binding; GO:0005506,iron ion binding; GO:0004497,monooxygenase activity; GO:0016705,oxidoreductase activity, acting on paired donors, with incorporation or reduction of molecular oxygen	PF00067.22:Cytochrome P450
gene-LOC110725281	24.48	28.29	28.89	61.03	58.6	66.49	1013	1115	980	1580	2252	2412	1.31596	5.00541e-06	0.001925	up	NW_018742810.1	1715486	1720226	-	LOC110725281	--	K15378 solute carrier family 45, member 1/2/4 | (RefSeq) sucrose transport protein-like isoform X1 (A)	--	sucrose transport protein-like isoform X1 [Chenopodium quinoa]	RecName: Full=Sucrose transport protein; AltName: Full=Sucrose permease; AltName: Full=Sucrose-proton symporter;	SubName: Full=Uncharacterized protein {ECO:0000313|EMBL:KNA14685.1};	Sucrose transporter and related proteins	GO:0005887,integral component of plasma membrane; GO:0008515,sucrose transmembrane transporter activity; GO:0015293,symporter activity; GO:0005985,sucrose metabolic process	PF13347.6:MFS/sugar transport protein
gene-LOC110725298	1.39	1.29	1	2.75	2.65	4.25	172	151	101	212	303	459	1.5103	0.000203925	0.0259362	up	NW_018742810.1	1916475	1926473	-	LOC110725298	--	K00921 1-phosphatidylinositol-3-phosphate 5-kinase [EC:2.7.1.150] | (RefSeq) putative 1-phosphatidylinositol-3-phosphate 5-kinase FAB1D (A)	ko00562: Inositol phosphate metabolism; ko04070: Phosphatidylinositol signaling system; ko04145: Phagosome	putative 1-phosphatidylinositol-3-phosphate 5-kinase FAB1D [Chenopodium quinoa]	RecName: Full=Putative 1-phosphatidylinositol-3-phosphate 5-kinase FAB1D; Short=Phosphatidylinositol 3-phosphate 5-kinase; EC=2.7.1.150; AltName: Full=Phosphatidylinositol 3-phosphate 5-kinase type III; Short=PIPkin-III; Short=Type III PIP kinase; AltName: Full=Protein FORMS APLOID AND BINUCLEATE CELLS 1D;	SubName: Full=Uncharacterized protein {ECO:0000313|EMBL:KNA12894.1};	Phosphatidylinositol-4-phosphate 5-kinase and related FYVE finger-containing proteins	GO:0005829,cytosol; GO:0010008,endosome membrane; GO:0000285,1-phosphatidylinositol-3-phosphate 5-kinase activity; GO:0005524,ATP binding; GO:0046854,phosphatidylinositol phosphorylation; GO:0042147,retrograde transport, endosome to Golgi	PF01504.18:Phosphatidylinositol-4-phosphate 5-Kinase
gene-LOC110726359	58.48	49.02	46.61	19.73	16.3	19.12	649	518	424	137	168	186	-1.34052	0.000323994	0.0347728	down	NW_018742879.1	757539	761785	+	LOC110726359	--	--	--	protein Asterix-like [Chenopodium quinoa]	RecName: Full=Protein Asterix;	SubName: Full=Uncharacterized protein {ECO:0000313|EMBL:KMS96018.1};	Predicted membrane protein	GO:0016021,integral component of membrane	PF03669.13:Uncharacterised protein family (UPF0139)
gene-LOC110726443	19.45	19.61	21.16	36.48	37.64	43.76	850	816	758	997	1527	1676	1.09033	5.78358e-05	0.0113235	up	NW_018742879.1	2191208	2194592	-	LOC110726443	--	--	--	cyclic dof factor 3-like isoform X1 [Chenopodium quinoa]	RecName: Full=Cyclic dof factor 3; AltName: Full=Dof zinc finger protein DOF3.3; Short=AtDOF3.3; AltName: Full=H-protein promoter-binding factor 2a;	SubName: Full=Uncharacterized protein {ECO:0000313|EMBL:KNA15358.1};	--	GO:0005634,nucleus; GO:0003677,DNA binding; GO:0003700,DNA-binding transcription factor activity; GO:0046872,metal ion binding; GO:0009908,flower development; GO:0006355,regulation of transcription, DNA-templated; GO:0006351,transcription, DNA-templated	PF02701.15:Dof domain, zinc finger
gene-LOC110726719	0.06	0.08	0	2.61	4.45	5.79	4	5	0	106	269	330	6.58778	1.56382e-12	4.59266e-09	up	NW_018742881.1	547669	552260	-	LOC110726719	--	K13459 disease resistance protein RPS2 | (RefSeq) disease resistance protein At4g27190-like (A)	ko04626: Plant-pathogen interaction	disease resistance protein At4g27190-like [Chenopodium quinoa]	RecName: Full=Disease resistance protein At4g27190;	SubName: Full=Uncharacterized protein {ECO:0000313|EMBL:KNA18745.1};	Apoptotic ATPase	GO:0005886,plasma membrane; GO:0043531,ADP binding; GO:0005524,ATP binding; GO:0006952,defense response; GO:0007165,signal transduction	PF00931.22:NB-ARC domain
gene-LOC110727078	0.26	0.15	0.11	3.87	4.18	4.99	9	5	3	83	133	150	4.76608	2.8999e-10	3.90338e-07	up	NW_018742899.1	1095843	1097771	-	LOC110727078	--	--	--	uncharacterized protein LOC110727078 [Chenopodium quinoa]	--	SubName: Full=Uncharacterized protein {ECO:0000313|EMBL:KNA16450.1};	--	--	PF04601.13:Domain of unknown function (DUF569)
gene-LOC110727141	0.05	0.01	0	1.26	0.33	0.99	4	1	0	59	23	65	5.43341	0.000306663	0.0338372	up	NW_018742899.1	2526114	2530917	+	LOC110727141	--	--	--	putative disease resistance RPP13-like protein 1 [Chenopodium quinoa]	RecName: Full=Disease resistance protein RGA2; AltName: Full=Blight resistance protein RPI; AltName: Full=RGA2-blb;	SubName: Full=NBS-LRR disease resistance protein NBS46 {ECO:0000313|EMBL:AKE49461.1};	--	GO:0043531,ADP binding; GO:0005524,ATP binding; GO:0006952,defense response	PF18052.1:Rx N-terminal domain
gene-LOC110727697	1.12	1.36	1.52	1.43	37.3	33.31	54	62	60	43	1663	1402	4.19785	2.34501e-05	0.00569591	up	NW_018742205.1	999624	1004279	-	LOC110727697	--	K12130 pseudo-response regulator 5 | (RefSeq) two-component response regulator-like APRR5 isoform X1 (A)	ko04712: Circadian rhythm - plant	two-component response regulator-like APRR5 isoform X1 [Chenopodium quinoa]	RecName: Full=Two-component response regulator-like APRR5; AltName: Full=Pseudo-response regulator 5;	SubName: Full=Uncharacterized protein {ECO:0000313|EMBL:KNA04851.1};	GATA-4/5/6 transcription factors	GO:0005634,nucleus; GO:0000160,phosphorelay signal transduction system; GO:0006355,regulation of transcription, DNA-templated; GO:0048511,rhythmic process; GO:0006351,transcription, DNA-templated	PF00072.24:Response regulator receiver domain
gene-LOC110728530	25.54	28.76	27.2	10.14	11.78	13.57	773	829	675	192	331	360	-1.08208	0.000211907	0.0268457	down	NW_018742951.1	4054400	4069073	+	LOC110728530	--	--	--	phosphoglucan phosphatase DSP4, amyloplastic-like isoform X1 [Chenopodium quinoa]	RecName: Full=Phosphoglucan phosphatase DSP4, amyloplastic {ECO:0000250|UniProtKB:Q9FEB5}; EC=3.1.3.- {ECO:0000250|UniProtKB:Q9FEB5}; AltName: Full=Dual specificity protein phosphatase 4 {ECO:0000303|PubMed:21631532}; Short=CsDSP4 {ECO:0000303|PubMed:21631532}; Flags: Precursor;	SubName: Full=Uncharacterized protein {ECO:0000313|EMBL:KNA21364.1};	Dual specificity phosphatase	GO:0009501,amyloplast; GO:0005634,nucleus; GO:0019203,carbohydrate phosphatase activity; GO:0008138,protein tyrosine/serine/threonine phosphatase activity; GO:0007623,circadian rhythm; GO:0005982,starch metabolic process	PF16561.5:Glycogen recognition site of AMP-activated protein kinase
gene-LOC110728549	3.78	3.41	3.52	9.7	8.99	10.26	164	141	125	263	362	390	1.56751	2.1612e-05	0.00549876	up	NW_018742205.1	1944572	1949593	-	LOC110728549	--	--	--	uncharacterized protein LOC110728549 [Chenopodium quinoa]	--	SubName: Full=Uncharacterized protein {ECO:0000313|EMBL:KNA22343.1};	Soluble epoxide hydrolase	GO:0016021,integral component of membrane	PF00561.20:alpha/beta hydrolase fold
gene-LOC110728958	7	7.31	9.04	14.97	16.84	23.48	326	324	345	436	728	958	1.34334	0.000219237	0.0271358	up	NW_018742966.1	523984	526722	-	LOC110728958	--	--	--	uncharacterized protein LOC110728958 [Chenopodium quinoa]	--	SubName: Full=Uncharacterized protein {ECO:0000313|EMBL:KNA11381.1};	--	--	PF04720.12:PDDEXK-like family of unknown function
gene-LOC110729329	0	0.03	0	1.77	0.94	1.76	0	1	0	38	30	53	7.18401	6.84297e-05	0.0127782	up	NW_018742980.1	299595	304019	+	LOC110729329	--	K22390 acid phosphatase type 7 | (RefSeq) purple acid phosphatase 22-like (A)	--	purple acid phosphatase 22-like [Chenopodium quinoa]	RecName: Full=Purple acid phosphatase 22; EC=3.1.3.2; Flags: Precursor;	RecName: Full=Purple acid phosphatase {ECO:0000256|RuleBase:RU361203}; EC=3.1.3.2 {ECO:0000256|RuleBase:RU361203}; Flags: Fragment;	Purple acid phosphatase	GO:0005576,extracellular region; GO:0003993,acid phosphatase activity; GO:0046872,metal ion binding	PF16656.5:Purple acid Phosphatase, N-terminal domain
gene-LOC110729490	0.06	0.12	0	1.43	1.5	4.71	1	2	0	16	25	74	5.53403	0.000498163	0.0473328	up	NW_018742987.1	1523826	1524695	+	LOC110729490	--	K20718 LRR receptor-like serine/threonine-protein kinase ERECTA [EC:2.7.11.1] | (RefSeq) LRR receptor-like serine/threonine-protein kinase ERECTA (A)	ko04016: MAPK signaling pathway - plant	LRR receptor-like serine/threonine-protein kinase ERECTA [Chenopodium quinoa]	RecName: Full=LRR receptor-like serine/threonine-protein kinase ERECTA {ECO:0000303|PubMed:8624444}; EC=2.7.11.1; AltName: Full=Protein QUANTITATIVE RESISTANCE TO PLECTOSPHAERELLA 1; AltName: Full=Protein QUANTITATIVE RESISTANCE TO RALSTONIA SOLANACEARUM 1; AltName: Full=Protein TRANSPIRATION EFFICIENCY 1; Flags: Precursor;	SubName: Full=Uncharacterized protein {ECO:0000313|EMBL:OWM80356.1};	FOG: Leucine rich repeat	GO:0016021,integral component of membrane; GO:0005739,mitochondrion; GO:0005886,plasma membrane; GO:0005524,ATP binding; GO:0042277,peptide binding; GO:0004674,protein serine/threonine kinase activity; GO:0019199,transmembrane receptor protein kinase activity; GO:0070370,cellular heat acclimation; GO:0042742,defense response to bacterium; GO:0050832,defense response to fungus; GO:0048281,inflores…	PF13855.6:Leucine rich repeat
gene-LOC110729549	3.46	4.82	11.5	11.74	48.83	70.08	214	284	583	454	2804	3798	2.72516	0.00041699	0.0410947	up	NW_018742987.1	415327	418769	-	LOC110729549	--	--	--	S-type anion channel SLAH2-like [Chenopodium quinoa]	RecName: Full=S-type anion channel SLAH3; AltName: Full=SLAC1-homolog protein 3;	SubName: Full=Uncharacterized protein {ECO:0000313|EMBL:KNA07899.1};	--	GO:0016021,integral component of membrane; GO:0005886,plasma membrane; GO:0008308,voltage-gated anion channel activity; GO:0006873,cellular ion homeostasis; GO:0006821,chloride transport; GO:0009651,response to salt stress; GO:0009414,response to water deprivation	PF03595.17:Voltage-dependent anion channel
gene-LOC110729652	0.05	0.29	0	3.62	9.11	11.49	1	6	0	49	183	218	6.25865	5.33438e-07	0.000302329	up	NW_018742987.1	1422231	1423946	-	LOC110729652	--	--	--	uncharacterized protein LOC110729652 [Chenopodium quinoa]	--	SubName: Full=Uncharacterized protein {ECO:0000313|EMBL:KNA21066.1};	--	--	PF06521.11:PAR1 protein
gene-LOC110729694	25.31	26.43	18.97	4.56	7.4	10.31	913	908	561	103	248	326	-1.56461	8.32556e-05	0.0146172	down	NW_018742987.1	1875165	1881433	-	LOC110729694	--	--	--	protein IQ-DOMAIN 14-like [Chenopodium quinoa]	--	SubName: Full=Uncharacterized protein {ECO:0000313|EMBL:KNA17091.1};	--	--	PF13178.6:Protein of unknown function (DUF4005)
gene-LOC110729715	0	0	0	0	9.81	7.98	0	0	0	0	456	350	10.5724	6.13828e-05	0.0118741	up	NW_018742987.1	2132493	2134922	-	LOC110729715	--	K09286 EREBP-like factor | (RefSeq) ethylene-responsive transcription factor ERF023-like (A)	--	dehydration-responsive element-binding protein 1A-like [Chenopodium quinoa]	RecName: Full=Dehydration-responsive element-binding protein 1A {ECO:0000303|PubMed:9707537}; Short=Protein DREB1A {ECO:0000303|PubMed:9707537}; AltName: Full=C-repeat/dehydration-responsive element-binding factor 3 {ECO:0000303|PubMed:9881163}; Short=C-repeat-binding factor 3 {ECO:0000303|PubMed:9881163}; Short=CRT/DRE-binding factor 3 {ECO:0000303|PubMed:9881163}; AltName: Full=Cold resistance-…	SubName: Full=Uncharacterized protein {ECO:0000313|EMBL:KNA09465.1};	--	GO:0005634,nucleus; GO:0003677,DNA binding; GO:0003700,DNA-binding transcription factor activity; GO:0009631,cold acclimation; GO:0009409,response to cold; GO:0009414,response to water deprivation; GO:0006351,transcription, DNA-templated	PF00847.20:AP2 domain
gene-LOC110729861	2.19	2.78	0.91	6.92	4.82	11.84	226	273	77	446	461	1069	2.13825	0.000351766	0.0366574	up	NW_018743014.1	1090430	1100911	+	LOC110729861	--	K05643 ATP-binding cassette, subfamily A (ABC1), member 3 | (RefSeq) ABC transporter A family member 1-like isoform X1 (A)	ko02010: ABC transporters	ABC transporter G family member 35-like [Chenopodium quinoa]	RecName: Full=ABC transporter G family member 42 {ECO:0000303|PubMed:18299247}; Short=OsABCG42 {ECO:0000303|PubMed:18299247}; AltName: Full=Pleiotropic drug resistance protein 12 {ECO:0000303|PubMed:12644668, ECO:0000303|PubMed:16506311}; Short=OsPDR12 {ECO:0000303|PubMed:16506311};	SubName: Full=Uncharacterized protein {ECO:0000313|EMBL:KNA16701.1};	Pleiotropic drug resistance proteins (PDR1-15), ABC superfamily	GO:0016021,integral component of membrane; GO:0005886,plasma membrane; GO:0005524,ATP binding; GO:0042626,ATPase activity, coupled to transmembrane movement of substances	PF01061.24:ABC-2 type transporter
gene-LOC110729884	1.77	2.59	2.87	0	0.14	0.17	94	131	125	0	7	8	-4.45192	7.16203e-05	0.0132211	down	NW_018743014.1	1626540	1629952	+	LOC110729884	--	--	--	uncharacterized protein LOC110729884 isoform X1 [Chenopodium quinoa]	--	SubName: Full=Uncharacterized protein {ECO:0000313|EMBL:KNA06227.1};	--	GO:0016021,integral component of membrane	PF04530.12:Viral Beta C/D like family
gene-LOC110729886	48.89	47.45	18.22	129.35	112.82	204.77	910	841	278	1506	1950	3341	2.10522	1.987e-05	0.00521871	up	NW_018743014.1	1658010	1659177	-	LOC110729886	--	--	--	uncharacterized protein LOC110729886 [Chenopodium quinoa]	--	SubName: Full=Uncharacterized protein {ECO:0000313|EMBL:KNA21688.1};	Nuclear localization sequence binding protein	--	--
gene-LOC110730096	25.89	30.62	41.47	163.8	150.64	276.99	1279	1440	1679	5061	6910	11993	2.68219	5.90333e-11	1.05948e-07	up	NW_018743021.1	302869	305267	-	LOC110730096	--	K09840 9-cis-epoxycarotenoid dioxygenase [EC:1.13.11.51] | (RefSeq) probable carotenoid cleavage dioxygenase 4, chloroplastic (A)	ko00906: Carotenoid biosynthesis	probable carotenoid cleavage dioxygenase 4, chloroplastic [Chenopodium quinoa]	RecName: Full=Probable carotenoid cleavage dioxygenase 4, chloroplastic; Short=AtCCD4; EC=1.14.99.-; AltName: Full=AtNCED4; Flags: Precursor;	SubName: Full=Uncharacterized protein {ECO:0000313|EMBL:KNA23039.1};	Beta, beta-carotene 15,15'-dioxygenase and related enzymes	GO:0009507,chloroplast; GO:0010287,plastoglobule; GO:0046872,metal ion binding; GO:0016702,oxidoreductase activity, acting on single donors with incorporation of molecular oxygen, incorporation of two atoms of oxygen	PF03055.15:Retinal pigment epithelial membrane protein
gene-LOC110730263	81.95	77.67	60.6	97.96	225.36	245.57	3179	2869	1927	2377	8118	8350	1.46166	0.000199304	0.0256377	up	NW_018743021.1	2316003	2318597	+	LOC110730263	--	K01177 beta-amylase [EC:3.2.1.2] | (RefSeq) beta-amylase 3, chloroplastic-like (A)	ko00500: Starch and sucrose metabolism	beta-amylase 3, chloroplastic-like [Chenopodium quinoa]	RecName: Full=Beta-amylase 3, chloroplastic; EC=3.2.1.2; AltName: Full=1,4-alpha-D-glucan maltohydrolase; AltName: Full=Beta-amylase 8; AltName: Full=Chloroplast beta-amylase; Short=CT-BMY; Flags: Precursor;	RecName: Full=Beta-amylase {ECO:0000256|RuleBase:RU000509}; EC=3.2.1.2 {ECO:0000256|RuleBase:RU000509};	--	GO:0009570,chloroplast stroma; GO:0102229,amylopectin maltohydrolase activity; GO:0016161,beta-amylase activity; GO:0000024,maltose biosynthetic process; GO:0009409,response to cold; GO:0005983,starch catabolic process	PF01373.17:Glycosyl hydrolase family 14
gene-LOC110730331	57.81	62.47	38.73	119.75	200.11	289.81	1657	1705	910	2147	5326	7281	2.03814	1.28765e-07	8.48929e-05	up	NW_018743021.1	3225861	3227252	+	LOC110730331	--	K09286 EREBP-like factor | (RefSeq) ethylene-responsive transcription factor ERF104-like (A)	--	ethylene-responsive transcription factor ERF104-like [Chenopodium quinoa]	RecName: Full=Ethylene-responsive transcription factor ERF105;	SubName: Full=Uncharacterized protein {ECO:0000313|EMBL:KNA24910.1};	--	GO:0005634,nucleus; GO:0003677,DNA binding; GO:0003700,DNA-binding transcription factor activity; GO:0009873,ethylene-activated signaling pathway; GO:0010200,response to chitin; GO:0006351,transcription, DNA-templated	PF00847.20:AP2 domain
gene-LOC110730993	126.02	118.71	105.27	29.07	51.61	41.17	1767	1585	1210	255	672	506	-1.40442	1.32741e-05	0.00376213	down	NW_018743051.1	790796	794830	+	LOC110730993	--	K11099 small nuclear ribonucleoprotein G | (RefSeq) probable small nuclear ribonucleoprotein G (A)	ko03040: Spliceosome	probable small nuclear ribonucleoprotein G [Chenopodium quinoa]	RecName: Full=Probable small nuclear ribonucleoprotein G; Short=snRNP-G; AltName: Full=Sm protein G; Short=Sm-G; Short=SmG;	SubName: Full=Uncharacterized protein {ECO:0000313|EMBL:ONH96043.1};	Small Nuclear ribonucleoprotein G	GO:0071013,catalytic step 2 spliceosome; GO:0005829,cytosol; GO:0043186,P granule; GO:0071011,precatalytic spliceosome; GO:0034719,SMN-Sm protein complex; GO:0097526,spliceosomal tri-snRNP complex; GO:0005685,U1 snRNP; GO:0005689,U12-type spliceosomal complex; GO:0005686,U2 snRNP; GO:0071004,U2-type prespliceosome; GO:0005687,U4 snRNP; GO:0005682,U5 snRNP; GO:0003729,mRNA binding; GO:0000398,mRNA…	PF01423.22:LSM domain
gene-LOC110731103	53.56	51.5	27.79	47.61	282.09	371.97	804	736	342	447	3932	4894	2.4653	0.000510757	0.0482456	up	NW_018742205.1	7063320	7064492	+	LOC110731103	--	--	--	non-specific lipid-transfer protein-like [Chenopodium quinoa]	RecName: Full=Non-specific lipid-transfer protein; Short=LTP; Flags: Precursor;	RecName: Full=Non-specific lipid-transfer protein {ECO:0000256|RuleBase:RU000628};	--	GO:0008289,lipid binding; GO:0050832,defense response to fungus; GO:0031640,killing of cells of other organism; GO:0006869,lipid transport	PF00234.22:Protease inhibitor/seed storage/LTP family
gene-LOC110731562	5.99	5.29	4.44	9.25	13.59	22.78	296	249	180	286	624	987	1.62878	0.000163422	0.0229373	up	NW_018743074.1	568516	571804	+	LOC110731562	--	K00924 kinase [EC:2.7.1.-] | (RefSeq) receptor protein kinase TMK1-like (A)	--	calmodulin-binding receptor-like cytoplasmic kinase 2 isoform X1 [Chenopodium quinoa]	RecName: Full=Calmodulin-binding receptor-like cytoplasmic kinase 2; EC=2.7.11.1;	SubName: Full=Uncharacterized protein {ECO:0000313|EMBL:KNA09231.1};	Serine/threonine protein kinase	GO:0005737,cytoplasm; GO:0005524,ATP binding; GO:0004674,protein serine/threonine kinase activity; GO:0009555,pollen development	PF00069.25:Protein kinase domain
gene-LOC110731568	0.76	0.91	1.73	4.24	5.37	5.87	47	54	88	165	310	320	2.27753	0.000144457	0.0211162	up	NW_018743074.1	650985	657032	-	LOC110731568	--	K00521 ferric-chelate reductase [EC:1.16.1.7] | (RefSeq) ferric reduction oxidase 2-like isoform X1 (A)	--	ferric reduction oxidase 2-like isoform X1 [Chenopodium quinoa]	RecName: Full=Ferric reduction oxidase 2; Short=AtFRO2; EC=1.16.1.7; AltName: Full=Ferric-chelate reductase 2; AltName: Full=Protein FERRIC CHELATE REDUCTASE DEFECTIVE 1;	SubName: Full=Uncharacterized protein {ECO:0000313|EMBL:KNA19832.1};	Ferric reductase, NADH/NADPH oxidase and related proteins	GO:0016021,integral component of membrane; GO:0005886,plasma membrane; GO:0000293,ferric-chelate reductase activity; GO:0046872,metal ion binding; GO:0006811,ion transport; GO:0015688,iron chelate transport; GO:0055072,iron ion homeostasis; GO:0009617,response to bacterium	PF08030.12:Ferric reductase NAD binding domain
gene-LOC110731743	0.12	0.13	0	3.35	1.61	2.52	4	4	0	70	50	74	5.1115	4.22621e-05	0.00902046	up	NW_018743074.1	2634337	2635960	-	LOC110731743	--	--	--	BON1-associated protein 1-like [Chenopodium quinoa]	RecName: Full=BON1-associated protein 2; AltName: Full=Protein BON1-ASSOCIATED PROTEIN 1-LIKE;	SubName: Full=BON1-associated protein 2-like {ECO:0000313|RefSeq:XP_016478463.1};	--	GO:0016020,membrane; GO:0006952,defense response	PF00168.30:C2 domain
gene-LOC110731832	7.89	8.17	13.02	22.66	28.7	41.13	210	207	284	377	709	959	1.74911	0.000148819	0.0215587	up	NW_018743099.1	1362184	1365640	-	LOC110731832	--	K13993 HSP20 family protein | (RefSeq) 26.5 kDa heat shock protein, mitochondrial-like (A)	ko04141: Protein processing in endoplasmic reticulum	uncharacterized protein LOC110731832 [Chenopodium quinoa]	RecName: Full=21.9 kDa heat shock protein; Short=OsHsp21.9; Flags: Precursor;	SubName: Full=Uncharacterized protein {ECO:0000313|EMBL:KNA16170.1};	Molecular chaperone (small heat-shock protein Hsp26/Hsp42)	GO:0005783,endoplasmic reticulum; GO:0009408,response to heat	PF00011.21:Hsp20/alpha crystallin family
gene-LOC110731856	152.06	170.67	0	0	0.13	0.2	2605	2784	0	0	2	3	-9.8147	7.51804e-07	0.000385508	down	NW_018743099.1	1987334	1988165	-	LOC110731856	--	--	--	glycine-rich protein 5-like [Chenopodium quinoa]	--	SubName: Full=Uncharacterized protein {ECO:0000313|EMBL:KNA05420.1};	--	--	--
gene-LOC110731872	0.03	0.28	0	1.57	6.11	3.22	1	8	0	30	173	86	5.27195	0.000279369	0.0318134	up	NW_018743099.1	2256305	2259188	+	LOC110731872	--	--	--	uncharacterized protein LOC110731872 [Chenopodium quinoa]	--	SubName: Full=Uncharacterized protein {ECO:0000313|EMBL:EYU46349.1};	--	--	--
gene-LOC110732185	56.84	62.15	64.35	23.03	30.45	30.37	1168	1216	1084	296	581	547	-1.01443	0.000412842	0.0410947	down	NW_018743159.1	134646	140918	-	LOC110732185	--	K20793 N-alpha-acetyltransferase 50 [EC:2.3.1.258] | (RefSeq) N-alpha-acetyltransferase 50-like (A)	--	N-alpha-acetyltransferase 50-like [Chenopodium quinoa]	RecName: Full=N-alpha-acetyltransferase MAK3; EC=2.3.1.256 {ECO:0000303|PubMed:12897255}; AltName: Full=N-acetyltransferase MAK3 homolog; Short=AtMAK3; AltName: Full=Protein PHOTOSYNTHESIS ALTERED MUTANT 21;	SubName: Full=Uncharacterized protein {ECO:0000313|EMBL:KNA17549.1};	Predicted N-acetyltransferase	GO:0005737,cytoplasm; GO:0031417,NatC complex; GO:0004596,peptide alpha-N-acetyltransferase activity; GO:0006474,N-terminal protein amino acid acetylation	PF00583.25:Acetyltransferase (GNAT) family
gene-LOC110732385	1.63	2.26	2.31	14.56	12.05	23.15	43	57	50	241	296	537	3.11168	8.70849e-10	9.07509e-07	up	NW_018743175.1	1811058	1812342	-	LOC110732385	--	K09286 EREBP-like factor | (RefSeq) ethylene-responsive transcription factor ERF104-like (A)	--	ethylene-responsive transcription factor ERF104-like [Chenopodium quinoa]	RecName: Full=Ethylene-responsive transcription factor ERF105;	SubName: Full=Uncharacterized protein {ECO:0000313|EMBL:KNA24910.1};	--	GO:0005634,nucleus; GO:0003677,DNA binding; GO:0003700,DNA-binding transcription factor activity; GO:0009873,ethylene-activated signaling pathway; GO:0010200,response to chitin; GO:0006351,transcription, DNA-templated	PF00847.20:AP2 domain
gene-LOC110732446	63.79	69.64	44.75	90.61	186.84	195.55	2556	2657	1470	2271	6952	6868	1.51262	4.6467e-05	0.00962254	up	NW_018743175.1	2575582	2578240	-	LOC110732446	--	K01177 beta-amylase [EC:3.2.1.2] | (RefSeq) beta-amylase 3, chloroplastic-like (A)	ko00500: Starch and sucrose metabolism	beta-amylase 3, chloroplastic-like [Chenopodium quinoa]	RecName: Full=Beta-amylase 3, chloroplastic; EC=3.2.1.2; AltName: Full=1,4-alpha-D-glucan maltohydrolase; AltName: Full=Beta-amylase 8; AltName: Full=Chloroplast beta-amylase; Short=CT-BMY; Flags: Precursor;	RecName: Full=Beta-amylase {ECO:0000256|RuleBase:RU000509}; EC=3.2.1.2 {ECO:0000256|RuleBase:RU000509};	--	GO:0009570,chloroplast stroma; GO:0102229,amylopectin maltohydrolase activity; GO:0016161,beta-amylase activity; GO:0000024,maltose biosynthetic process; GO:0009409,response to cold; GO:0005983,starch catabolic process	PF01373.17:Glycosyl hydrolase family 14
gene-LOC110732543	7.84	7.13	10	26.92	19.82	20.45	410	355	429	881	963	938	1.57192	0.000291352	0.0326809	up	NW_018743175.1	3660358	3662898	-	LOC110732543	--	K13422 transcription factor MYC2 | (RefSeq) transcription factor MYC2-like (A)	ko04016: MAPK signaling pathway - plant; ko04075: Plant hormone signal transduction	transcription factor MYC2-like [Chenopodium quinoa]	RecName: Full=Transcription factor MYC2 {ECO:0000305}; Short=OsMYC2 {ECO:0000303|PubMed:24647160}; AltName: Full=Basic helix-loop-helix protein 9 {ECO:0000303|PubMed:16896230}; Short=OsbHLH009 {ECO:0000303|PubMed:16896230}; Short=bHLH 9 {ECO:0000305};	SubName: Full=Uncharacterized protein {ECO:0000313|EMBL:KNA16438.1};	--	GO:0005634,nucleus; GO:0003677,DNA binding; GO:0046983,protein dimerization activity; GO:0006355,regulation of transcription, DNA-templated; GO:0006351,transcription, DNA-templated	PF14215.6:bHLH-MYC and R2R3-MYB transcription factors N-terminal
gene-LOC110732554	9.21	11.84	12.17	42.28	48.83	82.47	277	339	300	795	1363	2173	2.47505	1.73067e-10	2.54133e-07	up	NW_018743175.1	3801696	3804469	+	LOC110732554	--	--	--	uncharacterized protein LOC110732554 [Chenopodium quinoa]	--	SubName: Full=Uncharacterized protein {ECO:0000313|EMBL:KNA11271.1};	--	--	PF04640.14:PLATZ transcription factor
gene-LOC110732568	62.12	59.02	39.64	14.05	21.35	25.18	912	825	477	129	291	324	-1.29087	0.000450828	0.0438846	down	NW_018743175.1	3958706	3964921	+	LOC110732568	--	K12626 U6 snRNA-associated Sm-like protein LSm7 | (RefSeq) sm-like protein LSM7 (A)	ko03018: RNA degradation; ko03040: Spliceosome	sm-like protein LSM7 [Chenopodium quinoa]	RecName: Full=Sm-like protein LSM7 {ECO:0000305}; Short=AtLSM7 {ECO:0000303|PubMed:23620288}; AltName: Full=Protein EMBRYO DEFECTIVE 2816 {ECO:0000305}; AltName: Full=U6 snRNA-associated Sm-like protein LSM7 {ECO:0000305};	SubName: Full=Uncharacterized protein {ECO:0000313|EMBL:KNA20124.1};	Small Nuclear ribonucleoprotein splicing factor	GO:0071013,catalytic step 2 spliceosome; GO:0005737,cytoplasm; GO:1990726,Lsm1-7-Pat1 complex; GO:0097526,spliceosomal tri-snRNP complex; GO:0005689,U12-type spliceosomal complex; GO:0071004,U2-type prespliceosome; GO:0005688,U6 snRNP; GO:0003723,RNA binding; GO:0000398,mRNA splicing, via spliceosome; GO:0000956,nuclear-transcribed mRNA catabolic process; GO:0006396,RNA processing	PF01423.22:LSM domain
gene-LOC110732628	14.5	15.09	20.15	94.81	136.73	239.08	891	883	1015	3645	7804	12880	3.30958	8.38043e-15	6.76825e-11	up	NW_018743175.1	4560799	4563783	+	LOC110732628	--	--	--	--	--	--	--	--	--
gene-LOC110732819	1.2	1.33	1.2	6.8	4.91	6.96	86	91	71	306	328	439	2.46416	1.29528e-08	1.07292e-05	up	NW_018743175.1	1332128	1339374	-	LOC110732819	--	--	--	E3 ubiquitin ligase PQT3-like [Chenopodium quinoa]	RecName: Full=E3 ubiquitin ligase PQT3-like; EC=2.3.2.27 {ECO:0000250|UniProtKB:F4JP52};	SubName: Full=Uncharacterized protein {ECO:0000313|EMBL:KNA10699.1};	Predicted E3 ubiquitin ligase	GO:0005634,nucleus; GO:0003676,nucleic acid binding; GO:0016740,transferase activity; GO:0008270,zinc ion binding	PF08783.11:DWNN domain
gene-LOC110733038	16.51	17.34	4.3	0.97	1.8	1.49	543	543	116	20	55	43	-3.01022	2.21759e-05	0.00551072	down	NW_018743196.1	1256184	1260002	-	LOC110733038	--	--	--	uncharacterized protein LOC110733038 [Chenopodium quinoa]	--	SubName: Full=Uncharacterized protein {ECO:0000313|EMBL:KNA13915.1};	--	--	PF08450.12:SMP-30/Gluconolactonase/LRE-like region
gene-LOC110733285	4.44	5.53	8.34	13.61	20.06	29.18	172	204	265	330	722	991	1.8486	0.000229875	0.0282362	up	NW_018743199.1	117593	121071	-	LOC110733285	--	--	--	uncharacterized protein LOC110733285 [Chenopodium quinoa]	--	SubName: Full=Uncharacterized protein {ECO:0000313|EMBL:KNA14247.1};	--	--	PF04720.12:PDDEXK-like family of unknown function
gene-LOC110733302	1.95	2.12	1.67	7.36	3.78	7.36	135	140	95	319	243	447	1.83763	0.000364048	0.0375737	up	NW_018743199.1	278703	282736	+	LOC110733302	--	K14494 DELLA protein | (RefSeq) DELLA protein GAI-like (A)	ko04075: Plant hormone signal transduction	scarecrow-like protein 9 [Chenopodium quinoa]	RecName: Full=Scarecrow-like protein 14; Short=AtSCL14; AltName: Full=GRAS family protein 2; Short=AtGRAS-2;	SubName: Full=Uncharacterized protein {ECO:0000313|EMBL:KNA25071.1};	--	GO:0005829,cytosol; GO:0005634,nucleus; GO:0003700,DNA-binding transcription factor activity; GO:0043565,sequence-specific DNA binding; GO:0045893,positive regulation of transcription, DNA-templated; GO:0006355,regulation of transcription, DNA-templated; GO:0009410,response to xenobiotic stimulus; GO:0006351,transcription, DNA-templated	PF03514.14:GRAS domain family
gene-LOC110733331	43.83	41.09	32.44	80.84	72.23	97.86	1490	1330	904	1719	2280	2916	1.23231	9.18107e-06	0.00293658	up	NW_018743199.1	699372	701225	+	LOC110733331	--	K14497 protein phosphatase 2C [EC:3.1.3.16] | (RefSeq) protein phosphatase 2C 37-like (A)	ko04016: MAPK signaling pathway - plant; ko04075: Plant hormone signal transduction	protein phosphatase 2C 37-like [Chenopodium quinoa]	RecName: Full=Protein phosphatase 2C 37; Short=AtPP2C37; EC=3.1.3.16; AltName: Full=Protein ABA-HYPERSENSITIVE GERMINATION 3; AltName: Full=Protein phosphatase 2C A; Short=PP2CA;	SubName: Full=Protein phosphatase 2C {ECO:0000313|EMBL:CAC84141.2}; SubName: Full=protein phosphatase 2C 37-like {ECO:0000313|RefSeq:XP_016482340.1};	Serine/threonine protein phosphatase	GO:0005829,cytosol; GO:0005634,nucleus; GO:0046872,metal ion binding; GO:0004721,phosphoprotein phosphatase activity; GO:0019901,protein kinase binding; GO:0004722,protein serine/threonine phosphatase activity; GO:0009738,abscisic acid-activated signaling pathway; GO:0009788,negative regulation of abscisic acid-activated signaling pathway; GO:0010360,negative regulation of anion channel activity;…	PF00481.21:Protein phosphatase 2C
gene-LOC110733433	0.51	0.44	0	3.37	6.19	9.08	16	13	0	66	180	249	4.42362	0.00024157	0.0294393	up	NW_018743199.1	2060365	2065945	-	LOC110733433	--	--	--	uncharacterized protein LOC110733433 isoform X1 [Chenopodium quinoa]	--	SubName: Full=Uncharacterized protein {ECO:0000313|EMBL:KNA09149.1};	Predicted hydrolase/acyltransferase (alpha/beta hydrolase superfamily)	GO:0016021,integral component of membrane	PF10457.9:Cholesterol-capturing domain
gene-LOC110733450	101.62	105.11	84.53	166.99	200.26	226.03	4957	4882	3380	5095	9071	9664	1.15067	1.34658e-08	1.08753e-05	up	NW_018743199.1	2332806	2335328	+	LOC110733450	--	--	--	zinc finger CCCH domain-containing protein 29-like [Chenopodium quinoa]	RecName: Full=Zinc finger CCCH domain-containing protein 29; Short=AtC3H29; AltName: Full=AtSZF2;	SubName: Full=Uncharacterized protein {ECO:0000313|EMBL:KNA17908.1};	CCCH-type Zn-finger protein	GO:0005634,nucleus; GO:0003677,DNA binding; GO:0003700,DNA-binding transcription factor activity; GO:0046872,metal ion binding; GO:0050832,defense response to fungus; GO:0006355,regulation of transcription, DNA-templated; GO:0010200,response to chitin; GO:0009409,response to cold	PF00023.30:Ankyrin repeat
gene-LOC110733502	1.53	1.22	2.41	4.62	8.59	8.37	62	47	80	117	323	297	2.14317	0.000281648	0.0318134	up	NW_018743199.1	2896443	2899093	-	LOC110733502	--	K09286 EREBP-like factor | (RefSeq) dehydration-responsive element-binding protein 2E-like (A)	--	dehydration-responsive element-binding protein 2C-like isoform X1 [Chenopodium quinoa]	RecName: Full=Dehydration-responsive element-binding protein 2A; Short=Protein DREB2A;	SubName: Full=Uncharacterized protein {ECO:0000313|EMBL:KNA07422.1};	--	GO:0005634,nucleus; GO:0003677,DNA binding; GO:0003700,DNA-binding transcription factor activity; GO:0006351,transcription, DNA-templated	PF00847.20:AP2 domain
gene-LOC110733612	10.22	10.64	5.66	24.97	22.71	26.81	780	773	354	1192	1609	1793	1.64397	8.14579e-06	0.00271288	up	NW_018743199.1	4364377	4372476	-	LOC110733612	--	K00696 sucrose-phosphate synthase [EC:2.4.1.14] | (RefSeq) sucrose-phosphate synthase-like (A)	ko00500: Starch and sucrose metabolism	sucrose-phosphate synthase-like [Chenopodium quinoa]	RecName: Full=Sucrose-phosphate synthase; EC=2.4.1.14; AltName: Full=UDP-glucose-fructose-phosphate glucosyltransferase;	SubName: Full=Uncharacterized protein {ECO:0000313|EMBL:KNA09132.1};	Glycosyltransferase	GO:0016157,sucrose synthase activity; GO:0046524,sucrose-phosphate synthase activity; GO:0005986,sucrose biosynthetic process	PF00534.20:Glycosyl transferases group 1
gene-LOC110733933	406.3	388.85	428.88	49.16	104.54	84.81	7914	7212	6848	599	1891	1448	-2.26213	2.03335e-10	2.85598e-07	down	NW_018743204.1	3577247	3578539	+	LOC110733933	--	--	--	early light-induced protein 1, chloroplastic-like [Chenopodium quinoa]	RecName: Full=Early light-induced protein 2, chloroplastic {ECO:0000305}; Flags: Precursor;	SubName: Full=Uncharacterized protein {ECO:0000313|EMBL:KNA05469.1};	--	GO:0009535,chloroplast thylakoid membrane; GO:0016021,integral component of membrane; GO:0009522,photosystem I; GO:0009523,photosystem II; GO:0071483,cellular response to blue light; GO:0071490,cellular response to far red light; GO:0034605,cellular response to heat; GO:0071486,cellular response to high light intensity; GO:0071491,cellular response to red light; GO:0071492,cellular response to UV…	PF00504.21:Chlorophyll A-B binding protein
gene-LOC110734238	0.02	0.05	0	0.73	0.93	2.12	1	2	0	19	36	77	5.73556	0.000140131	0.0208004	up	NW_018743212.1	667492	672064	+	LOC110734238	--	K04125 gibberellin 2beta-dioxygenase [EC:1.14.11.13] | (RefSeq) gibberellin 2-beta-dioxygenase 2-like (A)	ko00904: Diterpenoid biosynthesis	gibberellin 2-beta-dioxygenase 2-like [Chenopodium quinoa]	RecName: Full=Gibberellin 2-beta-dioxygenase 2; EC=1.14.11.13; AltName: Full=GA 2-oxidase 2; AltName: Full=Gibberellin 2-beta-hydroxylase 2; AltName: Full=Gibberellin 2-oxidase 2;	SubName: Full=Gibberellin 2-oxidase 2 {ECO:0000313|EMBL:AAN87572.1};	Iron/ascorbate family oxidoreductases	GO:0045543,gibberellin 2-beta-dioxygenase activity; GO:0046872,metal ion binding; GO:0009686,gibberellin biosynthetic process	PF03171.20:2OG-Fe(II) oxygenase superfamily
gene-LOC110734251	2.37	2.81	1.86	8.39	4.79	12.73	109	123	70	241	204	512	2.00351	0.000338904	0.0356622	up	NW_018743212.1	772262	775918	-	LOC110734251	--	--	--	uncharacterized protein LOC110734251 isoform X1 [Chenopodium quinoa]	--	SubName: Full=Uncharacterized protein {ECO:0000313|EMBL:KNA20343.1};	--	GO:0016021,integral component of membrane	--
gene-LOC110734999	1.34	1.23	1.69	6.56	4.05	6.64	63	55	65	193	177	274	2.15139	0.000106758	0.0175856	up	NW_018743252.1	1396375	1398659	+	LOC110734999	--	K19041 E3 ubiquitin-protein ligase RNF38/44 [EC:2.3.2.27] | (RefSeq) RING-H2 finger protein ATL43-like (A)	--	RING-H2 finger protein ATL2-like [Chenopodium quinoa]	RecName: Full=RING-H2 finger protein ATL2; EC=2.3.2.27 {ECO:0000305}; AltName: Full=Protein ARABIDOPSIS TOXICOS EN LEVADURA 2; Short=Protein ATL2; AltName: Full=RING-type E3 ubiquitin transferase ATL2 {ECO:0000305};	SubName: Full=Uncharacterized protein {ECO:0000313|EMBL:KNA09744.1};	FOG: Predicted E3 ubiquitin ligase	GO:0016021,integral component of membrane; GO:0046872,metal ion binding; GO:0061630,ubiquitin protein ligase activity; GO:0006952,defense response; GO:0043161,proteasome-mediated ubiquitin-dependent protein catabolic process; GO:0010200,response to chitin	PF13639.6:Ring finger domain
gene-LOC110735128	147.92	139.54	81.1	16.53	22.67	9.48	1602	1439	720	112	228	90	-2.748	2.6014e-07	0.000158563	down	NW_018743252.1	6933837	6934362	-	LOC110735128	--	K11254 histone H4 | (RefSeq) histone H4 (A)	--	hypothetical protein SETIT_032292mg, partial [Setaria italica]	RecName: Full=Histone H4;	RecName: Full=Histone H4 {ECO:0000256|RuleBase:RU000528}; Flags: Fragment;	Histone H4	GO:0009507,chloroplast; GO:0005829,cytosol; GO:0000788,nuclear nucleosome; GO:0005730,nucleolus; GO:0005886,plasma membrane; GO:0009506,plasmodesma; GO:0009579,thylakoid; GO:0005774,vacuolar membrane; GO:0003677,DNA binding; GO:0042393,histone binding; GO:0046982,protein heterodimerization activity; GO:0006334,nucleosome assembly; GO:0009414,response to water deprivation	PF15511.6:Centromere kinetochore component CENP-T histone fold
gene-LOC110735199	78.43	80.64	14.62	4.81	6.64	7.78	3207	3140	490	123	252	279	-3.02256	5.94207e-06	0.00215684	down	NW_018743252.1	9521097	9526000	+	LOC110735199	--	K00083 cinnamyl-alcohol dehydrogenase [EC:1.1.1.195] | (RefSeq) probable cinnamyl alcohol dehydrogenase 6 isoform X1 (A)	ko00940: Phenylpropanoid biosynthesis	probable cinnamyl alcohol dehydrogenase 6 isoform X1 [Chenopodium quinoa]	RecName: Full=Probable cinnamyl alcohol dehydrogenase 6 {ECO:0000305}; Short=OsCAD6 {ECO:0000303|PubMed:15452707}; EC=1.1.1.195 {ECO:0000305};	SubName: Full=Uncharacterized protein {ECO:0000313|EMBL:KNA09004.1};	Alcohol dehydrogenase, class V	GO:0045551,cinnamyl-alcohol dehydrogenase activity; GO:0052747,sinapyl alcohol dehydrogenase activity; GO:0008270,zinc ion binding; GO:0009809,lignin biosynthetic process	PF08240.12:Alcohol dehydrogenase GroES-like domain
gene-LOC110735675	1.84	1.32	1.67	10.3	7.15	6.78	66	45	49	231	238	213	2.48916	9.28077e-06	0.00293936	up	NW_018743285.1	1515576	1517316	-	LOC110735675	--	K13415 protein brassinosteroid insensitive 1 [EC:2.7.10.1 2.7.11.1] | (RefSeq) systemin receptor SR160-like (A)	ko04075: Plant hormone signal transduction	brassinosteroid LRR receptor kinase BRL1-like [Chenopodium quinoa]	RecName: Full=Leucine-rich repeat receptor protein kinase EMS1 {ECO:0000305}; EC=2.7.11.1; AltName: Full=Protein EXCESS MICROSPOROCYTES 1 {ECO:0000303|PubMed:12154130}; AltName: Full=Protein EXTRA SPOROGENOUS CELLS {ECO:0000303|PubMed:12401166}; Flags: Precursor;	SubName: Full=Uncharacterized protein {ECO:0000313|EMBL:KNA24539.1};	Serine/threonine protein kinase	GO:0016021,integral component of membrane; GO:0016020,membrane; GO:0005886,plasma membrane; GO:0005524,ATP binding; GO:0004674,protein serine/threonine kinase activity; GO:0019199,transmembrane receptor protein kinase activity; GO:0010234,anther wall tapetum cell fate specification; GO:0009556,microsporogenesis; GO:0046777,protein autophosphorylation	PF07714.17:Protein tyrosine kinase
gene-LOC110736244	32.95	35.43	25.92	50.68	58.48	76.36	1475	1510	951	1419	2431	2996	1.0976	2.16172e-05	0.00549876	up	NW_018743292.1	1578113	1580763	+	LOC110736244	--	K16818 phospholipase A1 [EC:3.1.1.32] | (RefSeq) phospholipase A(1) DAD1, chloroplastic-like (A)	ko00564: Glycerophospholipid metabolism; ko00592: alpha-Linolenic acid metabolism	phospholipase A1-Igamma3, chloroplastic-like [Chenopodium quinoa]	RecName: Full=Phospholipase A1-Igamma3, chloroplastic; EC=3.1.1.-; Flags: Precursor;	SubName: Full=Uncharacterized protein {ECO:0000313|EMBL:KNA23416.1};	Predicted lipase	GO:0009507,chloroplast; GO:0047714,galactolipase activity; GO:0008970,phospholipase A1 activity; GO:0004806,triglyceride lipase activity; GO:0016042,lipid catabolic process	PF01764.25:Lipase (class 3)
gene-LOC110736400	3.34	3.43	4.98	14.88	11.32	16.11	138	135	169	385	435	584	1.96791	2.33731e-05	0.00569591	up	NW_018743292.1	2984248	2987992	-	LOC110736400	--	K08057 calreticulin | (RefSeq) calreticulin-3-like (A)	ko04141: Protein processing in endoplasmic reticulum; ko04145: Phagosome	calreticulin-3-like [Chenopodium quinoa]	RecName: Full=Calreticulin-3; AltName: Full=Protein PRIORITY IN SWEET LIFE 1; Flags: Precursor;	SubName: Full=Uncharacterized protein {ECO:0000313|EnsemblPlants:GLYMA18G47931.1};	Calreticulin	GO:0005783,endoplasmic reticulum; GO:0005788,endoplasmic reticulum lumen; GO:0005789,endoplasmic reticulum membrane; GO:0005509,calcium ion binding; GO:0030246,carbohydrate binding; GO:0051082,unfolded protein binding; GO:0046283,anthocyanin-containing compound metabolic process; GO:0010204,defense response signaling pathway, resistance gene-independent; GO:0042742,defense response to bacterium; …	PF00262.18:Calreticulin family
gene-LOC110736524	142.56	141.59	16.07	8.54	7.72	8.66	3041	2876	281	114	153	162	-3.40212	1.41333e-05	0.00393599	down	NW_018743292.1	4397846	4398881	+	LOC110736524	--	--	--	uncharacterized protein LOC110736524 [Chenopodium quinoa]	--	SubName: Full=Uncharacterized protein {ECO:0000313|EMBL:KNA14131.1};	--	--	PF04398.12:Protein of unknown function, DUF538
gene-LOC110736820	25.36	26.98	25.4	8.5	10.97	9.76	839	850	689	176	337	283	-1.28563	1.96646e-05	0.00520709	down	NW_018743292.1	7992914	7997880	+	LOC110736820	--	K03644 lipoyl synthase [EC:2.8.1.8] | (RefSeq) lipoyl synthase, chloroplastic-like (A)	ko00785: Lipoic acid metabolism	lipoyl synthase, chloroplastic-like [Chenopodium quinoa]	RecName: Full=Lipoyl synthase, chloroplastic {ECO:0000255|HAMAP-Rule:MF_03129}; EC=2.8.1.8 {ECO:0000255|HAMAP-Rule:MF_03129}; AltName: Full=Lipoate synthase {ECO:0000255|HAMAP-Rule:MF_03129}; Short=LS {ECO:0000255|HAMAP-Rule:MF_03129}; Short=Lip-syn {ECO:0000255|HAMAP-Rule:MF_03129}; AltName: Full=Lipoate synthase, plastidial {ECO:0000255|HAMAP-Rule:MF_03129}; Short=LIP1p {ECO:0000255|HAMAP-Rule:…	RecName: Full=Lipoyl synthase, chloroplastic {ECO:0000256|HAMAP-Rule:MF_03129}; EC=2.8.1.8 {ECO:0000256|HAMAP-Rule:MF_03129}; AltName: Full=Lipoate synthase {ECO:0000256|HAMAP-Rule:MF_03129}; Short=LS {ECO:0000256|HAMAP-Rule:MF_03129}; Short=Lip-syn {ECO:0000256|HAMAP-Rule:MF_03129}; AltName: Full=Lipoate synthase, plastidial {ECO:0000256|HAMAP-Rule:MF_03129}; Short=LIP1p {ECO:0000256|HAMAP-Rule:…	Lipoate synthase	GO:0009507,chloroplast; GO:0051539,4 iron, 4 sulfur cluster binding; GO:0016992,lipoate synthase activity; GO:0046872,metal ion binding	PF04055.21:Radical SAM superfamily
gene-LOC110737347	6.36	5.7	5.42	16.48	48.51	54.98	103	88	72	167	730	781	2.85373	2.39586e-07	0.000148843	up	NW_018743327.1	4058112	4060103	-	LOC110737347	--	K03094 S-phase kinase-associated protein 1 | (RefSeq) SKP1-like protein 1A (A)	ko04120: Ubiquitin mediated proteolysis; ko04141: Protein processing in endoplasmic reticulum	SKP1-like protein 1A [Chenopodium quinoa]	RecName: Full=SKP1-like protein 4; Short=AtSK4;	SubName: Full=SKP1 component {ECO:0000313|EMBL:OMO97849.1};	SCF ubiquitin ligase, Skp1 component	GO:0005737,cytoplasm; GO:0005730,nucleolus; GO:0005634,nucleus; GO:0019005,SCF ubiquitin ligase complex; GO:0016567,protein ubiquitination; GO:0006511,ubiquitin-dependent protein catabolic process	PF01466.19:Skp1 family, dimerisation domain
gene-LOC110737693	5.71	4.81	2.11	14.25	12.17	16.65	182	146	55	284	360	465	1.92617	0.000315178	0.0343957	up	NW_018743331.1	1322180	1323726	-	LOC110737693	--	K09286 EREBP-like factor | (RefSeq) ethylene-responsive transcription factor 11-like (A)	--	ethylene-responsive transcription factor 11-like [Chenopodium quinoa]	RecName: Full=Ethylene-responsive transcription factor 8; Short=AtERF8; AltName: Full=Ethylene-responsive element-binding factor 8; Short=EREBP-8;	SubName: Full=Uncharacterized protein {ECO:0000313|EMBL:KNA16822.1};	--	GO:0005634,nucleus; GO:0003677,DNA binding; GO:0003700,DNA-binding transcription factor activity; GO:0009873,ethylene-activated signaling pathway; GO:0006351,transcription, DNA-templated	PF00847.20:AP2 domain
gene-LOC110737943	1.64	1.48	0	18.33	19.03	29.51	29	25	0	203	313	458	4.58281	8.98484e-05	0.0153574	up	NW_018742244.1	29063	29922	+	LOC110737943	--	--	--	VQ motif-containing protein 10 [Chenopodium quinoa]	RecName: Full=VQ motif-containing protein 10 {ECO:0000303|PubMed:22535423}; Short=AtVQ10 {ECO:0000303|PubMed:22535423}; AltName: Full=Tobacco rattle virus-induced protein variant 1 {ECO:0000312|EMBL:AAV69753.1};	SubName: Full=Uncharacterized protein {ECO:0000313|EMBL:KNA10323.1};	--	GO:0005634,nucleus; GO:0006979,response to oxidative stress	PF05678.14:VQ motif
gene-LOC110738191	15.21	14.13	0	0	0	0.06	587	519	0	0	0	2	-8.77446	0.000214375	0.0269298	down	NW_018743381.1	296803	307803	-	LOC110738191	--	--	--	--	--	--	--	--	--
gene-LOC110738577	3.98	4.14	8.96	20	34.66	45.96	110	109	203	346	890	1114	2.61297	8.07442e-06	0.00271288	up	NW_018742244.1	719065	720910	-	LOC110738577	--	--	--	NAC domain-containing protein 35-like [Chenopodium quinoa]	RecName: Full=NAC domain-containing protein 22 {ECO:0000303|PubMed:15029955}; Short=ONAC022 {ECO:0000303|PubMed:15029955};	SubName: Full=Uncharacterized protein {ECO:0000313|EMBL:KNA11568.1};	--	GO:0005634,nucleus; GO:0043565,sequence-specific DNA binding; GO:1901002,positive regulation of response to salt stress; GO:1902584,positive regulation of response to water deprivation; GO:0045893,positive regulation of transcription, DNA-templated; GO:0006351,transcription, DNA-templated	PF02365.15:No apical meristem (NAM) protein
gene-LOC110738590	0.12	0	0	2.95	2.71	1.84	3	0	0	47	64	41	6.14109	0.000246692	0.0298478	up	NW_018742244.1	752296	754365	-	LOC110738590	--	K20628 expansin | (RefSeq) expansin-B3-like (A)	--	expansin-like A2 [Chenopodium quinoa]	RecName: Full=Expansin-like A1; Short=At-EXPL1; Short=AtEXLA1; Short=AtEXPL1; AltName: Full=Ath-ExpBeta-2.1; Flags: Precursor;	SubName: Full=Uncharacterized protein {ECO:0000313|EMBL:KNA15240.1}; Flags: Fragment;	--	GO:0005618,cell wall; GO:0005576,extracellular region; GO:0005794,Golgi apparatus; GO:0016021,integral component of membrane; GO:0009505,plant-type cell wall; GO:0009506,plasmodesma	PF01357.21:Pollen allergen
gene-LOC110738675	0.02	0.1	0	1.05	2.35	3.8	1	4	0	28	93	142	5.96158	8.47028e-06	0.00279217	up	NW_018742244.1	848434	852383	+	LOC110738675	--	K14209 solute carrier family 36 (proton-coupled amino acid transporter) | (RefSeq) amino acid transporter AVT3C-like (A)	--	lysine histidine transporter-like 8 [Chenopodium quinoa]	RecName: Full=Lysine histidine transporter-like 8; AltName: Full=Amino acid transporter-like protein 1;	SubName: Full=Uncharacterized protein {ECO:0000313|EMBL:KNA16391.1};	Amino acid transporters	GO:0016021,integral component of membrane; GO:0005886,plasma membrane; GO:0015171,amino acid transmembrane transporter activity; GO:0003333,amino acid transmembrane transport	PF01490.18:Transmembrane amino acid transporter protein
gene-LOC110739966	49.1	52.67	42.41	163.77	207.38	241.47	1832	1871	1297	3822	7185	7897	2.20552	9.20979e-24	2.97522e-19	up	NW_018743518.1	268478	270992	+	LOC110739966	--	K13424 WRKY transcription factor 33 | (RefSeq) WRKY transcription factor WRKY24-like (A)	ko04016: MAPK signaling pathway - plant; ko04626: Plant-pathogen interaction	probable WRKY transcription factor 40 [Chenopodium quinoa]	RecName: Full=Probable WRKY transcription factor 40; AltName: Full=WRKY DNA-binding protein 40;	SubName: Full=Uncharacterized protein {ECO:0000313|EMBL:OWM69570.1};	--	GO:0005634,nucleus; GO:0003700,DNA-binding transcription factor activity; GO:0043565,sequence-specific DNA binding; GO:0044212,transcription regulatory region DNA binding; GO:0042742,defense response to bacterium; GO:0050832,defense response to fungus; GO:0045892,negative regulation of transcription, DNA-templated; GO:0031347,regulation of defense response; GO:0010200,response to chitin; GO:00022…	PF03106.15:WRKY DNA -binding domain
novel.2655	5.45303	4.83653	5.70455	0.780032	1.76635	1.31021	308	259	328	37	92	67	-1.95712	0.000126126	0.0195139	down	NW_018743050.1	3136553	3137171	+	--	--	--	--	--	--	--	--	--	--
novel.1555	0	0	0	4.1176	0.474253	0.756903	0	0	0	102	14	21	8.67235	0.000147079	0.0214027	up	NW_018742680.1	19359	19688	.	--	--	K23810 (E)-8-carboxylinalool synthase [EC:1.14.14.-] | (RefSeq) GFH2; ripening-related P-450 enzyme-like (A)	ko00902: Monoterpenoid biosynthesis	cytochrome P450 76A2-like isoform X1 [Spinacia oleracea]	RecName: Full=Cytochrome P450 76A2; EC=1.14.-.-; AltName: Full=CYPLXXVIA2; AltName: Full=Cytochrome P-450EG7;	SubName: Full=Uncharacterized protein {ECO:0000313|EMBL:KZN01431.1};	Cytochrome P450 CYP2 subfamily	GO:0020037,heme binding; GO:0005506,iron ion binding; GO:0004497,monooxygenase activity; GO:0016705,oxidoreductase activity, acting on paired donors, with incorporation or reduction of molecular oxygen	PF00067.22:Cytochrome P450
novel.868	0	0	0	1.33467	4.02356	1.70126	0	0	0	96	321	132	10.2076	4.22966e-11	9.10927e-08	up	NW_018742418.1	1593289	1594241	.	--	--	K13484 5-hydroxyisourate hydrolase / 2-oxo-4-hydroxy-4-carboxy-5-ureidoimidazoline decarboxylase [EC:3.5.2.17 4.1.1.97] | (RefSeq) uric acid degradation bifunctional protein TTL (A)	ko00230: Purine metabolism	glutathione S-transferase T2-like [Chenopodium quinoa]	RecName: Full=Glutathione S-transferase T3; Short=AtGSTT3; EC=2.5.1.18; AltName: Full=GST class-theta member 3; AltName: Full=Glutathione S-transferase 10C;	SubName: Full=Uncharacterized protein {ECO:0000313|EnsemblPlants:Bo3g043190.1};	--	GO:0005737,cytoplasm; GO:0005634,nucleus; GO:0004364,glutathione transferase activity; GO:0006749,glutathione metabolic process; GO:0009407,toxin catabolic process	PF04504.14:Protein of unknown function, DUF573
novel.5573	17.0686	21.3279	13.8737	5.05612	9.27257	7.90351	1248	1476	1030	304	621	516	-1.09229	0.000196219	0.0256377	down	NW_018744297.1	1255740	1260279	+	--	--	--	--	uncharacterized protein LOC110711964 [Chenopodium quinoa]	--	SubName: Full=Uncharacterized protein {ECO:0000313|EMBL:KNA12851.1};	--	--	--
novel.8003	0	0	0	4.63319	0.861926	0.224156	0	0	0	120	25	7	8.85667	0.000172562	0.0237218	up	NW_018745395.1	1936824	1937168	.	--	--	--	--	--	--	--	--	--	--
novel.6322	24.6792	30.4576	18.724	5.38676	11.2452	10.5898	949	1108	731	171	396	363	-1.31478	3.61814e-05	0.00795129	down	NW_018744633.1	2289358	2290623	-	--	--	--	--	--	--	--	--	--	--
novel.621	0.091093	0	0	2.72545	0.935889	1.53323	17	0	0	394	151	241	6.22784	0.000175964	0.0240869	up	NW_018742329.1	7587035	7590691	-	--	--	--	--	--	--	--	--	--	--
novel.8525	1.83231	1.3595	3.57683	0	0.097569	0.14206	116	82	230	0	6	8	-4.9191	4.43699e-05	0.00936844	down	NW_018745617.1	2995116	2996012	+	--	--	--	--	--	--	--	--	--	--
novel.1598	0	0	0	4.71906	0.445997	2.0398	0	0	0	153	17	72	9.409	4.49309e-06	0.00175567	up	NW_018742684.1	3579128	3580650	+	--	--	--	--	--	--	--	--	--	--
novel.4512	0	0	0	4.4613	0.577206	0.6443	0	0	0	124	18	20	8.92981	6.74147e-05	0.0126618	up	NW_018743919.1	149353	149722	.	--	--	--	--	--	--	--	--	--	--
novel.5861	0	0	0	1.6037	1.30906	2.6726	0	0	0	120	109	216	9.98411	9.08486e-11	1.54466e-07	up	NW_018744495.1	22344	23335	.	--	--	--	--	uncharacterized protein LOC110738285 [Chenopodium quinoa]	RecName: Full=Sigma factor binding protein 1, chloroplastic; Short=AtsibI; Short=Sigma factor binding protein I; AltName: Full=SigA binding protein; AltName: Full=VQ motif-containing protein 23 {ECO:0000303|PubMed:22535423}; Short=AtVQ23 {ECO:0000303|PubMed:22535423}; Flags: Precursor;	SubName: Full=Uncharacterized protein {ECO:0000313|EMBL:KNA10947.1};	--	GO:0009507,chloroplast; GO:0005634,nucleus; GO:0071482,cellular response to light stimulus; GO:0009816,defense response to bacterium, incompatible interaction; GO:0051091,positive regulation of DNA-binding transcription factor activity	PF05678.14:VQ motif
novel.2133	0	0	0	2.76674	1.26915	2.77484	0	0	0	194	99	211	10.2674	9.57761e-11	1.54702e-07	up	NW_018742899.1	2869422	2870351	.	--	--	--	--	uncharacterized protein LOC110738285 [Chenopodium quinoa]	RecName: Full=Sigma factor binding protein 1, chloroplastic; Short=AtsibI; Short=Sigma factor binding protein I; AltName: Full=SigA binding protein; AltName: Full=VQ motif-containing protein 23 {ECO:0000303|PubMed:22535423}; Short=AtVQ23 {ECO:0000303|PubMed:22535423}; Flags: Precursor;	SubName: Full=Uncharacterized protein {ECO:0000313|EMBL:KNA10947.1};	--	GO:0009507,chloroplast; GO:0005634,nucleus; GO:0071482,cellular response to light stimulus; GO:0009816,defense response to bacterium, incompatible interaction; GO:0051091,positive regulation of DNA-binding transcription factor activity	PF05678.14:VQ motif
novel.97	0.53849	0.676475	0.924303	5.94678	2.89858	3.55721	156	186	272	1418	769	920	2.77174	4.03722e-05	0.00875318	up	NW_018742204.1	13638149	13641323	+	--	--	K13459 disease resistance protein RPS2 | (RefSeq) probable disease resistance protein At4g27220 (A)	ko04626: Plant-pathogen interaction	probable disease resistance protein At4g27220 [Chenopodium quinoa]	RecName: Full=Putative disease resistance protein At1g63350;	SubName: Full=Uncharacterized protein {ECO:0000313|EMBL:ERN01292.1};	Apoptotic ATPase	GO:0005886,plasma membrane; GO:0043531,ADP binding; GO:0005524,ATP binding; GO:0006952,defense response; GO:0007165,signal transduction	--
novel.5689	0	0	0	10.3342	1.13829	0.414858	0	0	0	243	30	11	9.80414	1.20089e-05	0.00346381	up	NW_018744348.1	526599	526910	.	--	--	--	--	--	--	--	--	--	--
novel.3659	29.3928	25.3712	19.1891	6.10583	14.3405	10.0774	2546	2080	1688	435	1137	779	-1.15195	0.000496869	0.0473328	down	NW_018743448.1	344604	345552	.	--	--	--	--	--	--	--	--	--	--
novel.41	0	0	0	4.528	0	1.18029	0	0	0	572	0	162	11.1188	4.14261e-05	0.0089218	up	NW_018742204.1	5927024	5928706	-	--	--	--	--	--	--	--	--	--	--
novel.785	0.582863	0.589713	0.314107	1.27433	1.08699	4.18056	284	272	156	511	486	1818	2.26079	0.000161029	0.0227979	up	NW_018742393.1	6992	29466	+	--	--	K13181 ATP-dependent RNA helicase DDX27 [EC:3.6.4.13] | (RefSeq) DEAD-box ATP-dependent RNA helicase 28-like (A)	--	uncharacterized protein LOC110699443 [Chenopodium quinoa]	--	SubName: Full=Uncharacterized protein {ECO:0000313|EMBL:AAY99341.1};	--	GO:0016021,integral component of membrane	--
novel.1255	0	0	0	0.889456	1.92236	1.37764	0	0	0	100	239	167	10.1083	8.2534e-12	2.05097e-08	up	NW_018742536.1	7647	9134	.	--	--	K13484 5-hydroxyisourate hydrolase / 2-oxo-4-hydroxy-4-carboxy-5-ureidoimidazoline decarboxylase [EC:3.5.2.17 4.1.1.97] | (RefSeq) uric acid degradation bifunctional protein TTL (A)	ko00230: Purine metabolism	glutathione S-transferase T2-like [Chenopodium quinoa]	RecName: Full=Glutathione S-transferase T3; Short=AtGSTT3; EC=2.5.1.18; AltName: Full=GST class-theta member 3; AltName: Full=Glutathione S-transferase 10C;	SubName: Full=Uncharacterized protein {ECO:0000313|EMBL:KYP64358.1};	--	GO:0005737,cytoplasm; GO:0005634,nucleus; GO:0004364,glutathione transferase activity; GO:0006749,glutathione metabolic process; GO:0009407,toxin catabolic process	--
novel.580	3.86518	3.3537	2.51936	11.6187	17.0655	30.7028	303	249	201	750	1225	2147	2.71549	1.11006e-12	3.58605e-09	up	NW_018742329.1	4546588	4547446	.	--	--	--	--	uncharacterized protein LOC110728831 [Chenopodium quinoa]	--	SubName: Full=Uncharacterized protein {ECO:0000313|EMBL:KNA16576.1};	--	--	PF04520.13:Senescence regulator
novel.4282	26.3741	24.8504	18.4439	4.90681	4.87274	4.70106	2104	1877	1495	322	356	335	-2.04568	3.52878e-08	2.6511e-05	down	NW_018743828.1	485727	486600	.	--	--	--	--	uncharacterized protein LOC110795405 isoform X1 [Spinacia oleracea]	--	--	--	--	--
novel.6018	0	0	0	3.94381	2.31116	0.997984	0	0	0	130	85	36	9.37877	6.03931e-07	0.000331516	up	NW_018744537.1	2125662	2126182	-	--	--	K10268 F-box and leucine-rich repeat protein 2/20 | (RefSeq) F-box/LRR-repeat protein 20-like (A)	--	F-box/LRR-repeat protein 20-like [Chenopodium quinoa]	--	SubName: Full=Uncharacterized protein {ECO:0000313|EMBL:KNA05739.1};	Leucine rich repeat proteins, some proteins contain F-box	--	PF13516.6:Leucine Rich repeat
novel.3648	0.079906	0	0	5.66136	0.716478	1.05315	4	0	0	227	32	46	7.09851	8.73059e-05	0.0151635	up	NW_018743434.1	523015	524171	-	--	--	K03283 heat shock 70kDa protein 1/2/6/8 | (RefSeq) heat shock cognate 70 kDa protein-like (A)	ko03040: Spliceosome; ko04141: Protein processing in endoplasmic reticulum; ko04144: Endocytosis	heat shock 70 kDa protein cognate 1-like [Chenopodium quinoa]	RecName: Full=Probable mediator of RNA polymerase II transcription subunit 37c; AltName: Full=Heat shock 70 kDa protein 4; AltName: Full=Heat shock cognate 70 kDa protein 4; AltName: Full=Heat shock cognate protein 70-4; Short=AtHsc70-4; AltName: Full=Heat shock protein 70-4; Short=AtHsp70-4;	SubName: Full=Heat shock protein {ECO:0000313|EMBL:AAC84134.1}; Flags: Fragment;	Molecular chaperones HSP70/HSC70, HSP70 superfamily	GO:0048046,apoplast; GO:0005618,cell wall; GO:0005829,cytosol; GO:0005794,Golgi apparatus; GO:0005739,mitochondrion; GO:0005634,nucleus; GO:0005886,plasma membrane; GO:0005774,vacuolar membrane; GO:0005524,ATP binding; GO:0031625,ubiquitin protein ligase binding; GO:0016567,protein ubiquitination; GO:0006355,regulation of transcription, DNA-templated; GO:0009617,response to bacterium; GO:0046686,…	PF00012.20:Hsp70 protein
novel.7085	0.051137	0.831677	7.18898	0	0	0	5	63	575	0	0	0	-10.1019	9.7704e-06	0.00303493	down	NW_018744991.1	2497638	2498500	.	--	--	--	--	--	--	--	--	--	--
novel.6011	12.2538	13.6805	8.52341	28.5997	23.4641	26.8376	1614	1706	1140	3098	2829	3152	1.44303	0.000273048	0.0316159	up	NW_018744537.1	1484810	1486252	.	--	--	--	--	uncharacterized protein LOC110794438 [Spinacia oleracea]	--	SubName: Full=Uncharacterized protein {ECO:0000313|EMBL:KNA08495.1};	--	--	--
novel.359	0.190993	0.49352	0	5.7984	2.56873	4.94977	16	39	0	397	196	368	4.70693	0.000251704	0.0301159	up	NW_018742241.1	357512	358423	.	--	--	--	--	--	--	--	--	--	--
novel.357	0.080014	0	0	0.705558	1.60378	1.90383	40	0	0	289	730	844	5.93688	0.000408503	0.0410947	up	NW_018742241.1	330619	336064	+	--	--	--	--	uncharacterized protein LOC110712346 [Chenopodium quinoa]	--	--	--	--	--
novel.354	0	0	0	5.79785	4.22211	4.85017	0	0	0	730	592	663	12.2337	3.25936e-19	5.26468e-15	up	NW_018742241.1	264531	266440	-	--	--	--	--	--	--	--	--	--	--
novel.355	0.083169	0.017593	0	2.66171	2.13207	2.82635	20	5	0	526	469	606	6.52806	1.12854e-09	1.10477e-06	up	NW_018742241.1	267557	271241	-	--	--	--	--	--	--	--	--	--	--
novel.8372	2.60171	1.52644	12.5322	0	0.360592	0.05761	90	50	440	0	12	2	-5.45335	0.000329697	0.0351513	down	NW_018745523.1	3972960	3978115	+	--	--	--	--	--	--	--	--	--	--
novel.4202	4.66027	6.17914	4.76573	1.72507	1.83832	1.97314	1090	1368	1132	332	394	412	-1.31523	0.000451004	0.0438846	down	NW_018743787.1	1180112	1182673	+	--	--	K09571 FK506-binding protein 4/5 [EC:5.2.1.8] | (RefSeq) hypothetical protein (A)	--	peptidyl-prolyl cis-trans isomerase FKBP42-like [Chenopodium quinoa]	RecName: Full=Peptidyl-prolyl cis-trans isomerase FKBP42; Short=PPIase FKBP42; EC=5.2.1.8; AltName: Full=42 kDa peptidyl-prolyl isomerase; AltName: Full=FK506-binding protein 42; Short=AtFKBP42; AltName: Full=Immunophilin FKBP42; AltName: Full=Protein TWISTED DWARF 1; AltName: Full=Protein ULTRACURVATA 2; AltName: Full=Rotamase;	SubName: Full=Uncharacterized protein {ECO:0000313|EMBL:KMT14268.1};	FKBP-type peptidyl-prolyl cis-trans isomerase	GO:0005783,endoplasmic reticulum; GO:0016021,integral component of membrane; GO:0005886,plasma membrane; GO:0005774,vacuolar membrane; GO:0005516,calmodulin binding; GO:0003755,peptidyl-prolyl cis-trans isomerase activity; GO:0009734,auxin-activated signaling pathway; GO:0048366,leaf development	PF00515.28:Tetratricopeptide repeat
novel.1812	0	0	0	0	10.2024	6.37618	0	0	0	0	415	252	10.3018	0.000126247	0.0195139	up	NW_018742763.1	4767570	4768958	-	--	--	--	--	--	--	--	--	--	--
novel.8447	0.083713	0	0	2.23567	1.3241	2.95182	8	0	0	166	110	238	6.52384	1.33668e-05	0.00376213	up	NW_018745542.1	1010757	1011744	-	--	--	--	--	--	--	--	--	--	--
novel.8448	0	0.109407	0	2.36822	1.84115	2.93813	0	12	0	222	192	299	6.35224	3.46608e-05	0.0076693	up	NW_018745542.1	1012889	1026215	-	--	--	--	--	--	--	--	--	--	--
novel.541	0.241023	0.0604	1.53263	0	0	0	33	8	211	0	0	0	-8.72254	0.000179104	0.0242598	down	NW_018742316.1	4416	23455	+	--	--	--	--	hypothetical protein GLYMA_13G021700, partial [Glycine max]	--	SubName: Full=Uncharacterized protein {ECO:0000313|EMBL:KRH17852.1}; Flags: Fragment;	--	--	--
novel.5964	0	0	0	3.82673	0.529114	0.892082	0	0	0	104	16	27	8.74702	8.08227e-05	0.0145865	up	NW_018744502.1	5502719	5503080	.	--	--	--	--	uncharacterized protein LOC110733778 [Chenopodium quinoa]	--	--	--	--	PF07956.11:Protein of Unknown function (DUF1690)
novel.2848	0	0	0	1.19131	0.618268	0.813378	0	0	0	44	26	33	8.01421	0.000188016	0.0249952	up	NW_018743175.1	4149347	4149836	.	--	--	K23222 nuclease HARBI1 [EC:3.1.-.-] | (RefSeq) uncharacterized protein LOC104242359 (A)	--	uncharacterized protein LOC110735287 [Chenopodium quinoa]	--	SubName: Full=Os11g0577650 protein {ECO:0000313|EMBL:BAT14577.1};	Predicted transposase	GO:0016021,integral component of membrane	--
novel.1712	0	0	0	8.20578	0.960546	0.438864	0	0	0	276	36	16	10.0023	3.8862e-06	0.0015693	up	NW_018742733.1	3155820	3156267	.	--	--	--	--	--	--	--	--	--	--
novel.6738	0	0	0	0	5.91755	2.74481	0	0	0	0	907	410	11.286	1.10901e-05	0.00325697	up	NW_018744821.1	1768992	1772701	+	--	--	K19984 exocyst complex component 5 | (RefSeq) uncharacterized protein LOC113272286 (A)	--	hypothetical protein SOVF_185310, partial [Spinacia oleracea]	RecName: Full=Putative AC9 transposase;	SubName: Full=Uncharacterized protein {ECO:0000313|EMBL:KNA05978.1}; Flags: Fragment;	Tam3-transposase (Ac family)	GO:0003677,DNA binding; GO:0046983,protein dimerization activity; GO:0006310,DNA recombination; GO:0032196,transposition	PF14372.6:Domain of unknown function (DUF4413)
novel.86	0.090693	0.035924	0	0.410601	1.71437	2.70643	32	13	0	120	554	852	5.37204	1.10073e-05	0.00325697	up	NW_018742204.1	11816639	11820505	.	--	--	K13428 LRR receptor-like serine/threonine-protein kinase EFR [EC:2.7.11.1] | (RefSeq) EFR; EF-TU receptor (A)	ko04626: Plant-pathogen interaction	LRR receptor-like serine/threonine-protein kinase EFR [Chenopodium quinoa]	RecName: Full=LRR receptor-like serine/threonine-protein kinase EFR; EC=2.7.11.1; AltName: Full=Elongation factor Tu receptor; Short=EF-Tu receptor; Flags: Precursor;	SubName: Full=Uncharacterized protein {ECO:0000313|EMBL:KNA13589.1};	--	GO:0012505,endomembrane system; GO:0016021,integral component of membrane; GO:0005886,plasma membrane; GO:0005524,ATP binding; GO:0004674,protein serine/threonine kinase activity; GO:0019199,transmembrane receptor protein kinase activity; GO:0010204,defense response signaling pathway, resistance gene-independent; GO:0016045,detection of bacterium; GO:0002764,immune response-regulating signaling p…	PF13855.6:Leucine rich repeat
novel.4353	7.93978	10.568	13.7413	1.38388	2.41985	1.97876	601	757	1056	87	168	134	-2.40526	2.97941e-06	0.00126091	down	NW_018743850.1	6077874	6078702	.	--	--	--	--	--	--	--	--	--	--
novel.8604	0	0	0	0	3.06147	2.12612	0	0	0	0	372	252	10.2045	0.000157873	0.0225667	up	NW_018745659.1	294020	295473	.	--	--	K09422 transcription factor MYB, plant | (RefSeq) transcription factor MYB51-like (A)	--	uncharacterized protein LOC110799052 [Spinacia oleracea]	RecName: Full=Putative ribonuclease H protein At1g65750; EC=3.1.26.4;	SubName: Full=Uncharacterized protein {ECO:0000313|EMBL:KMS97068.1};	FOG: Reverse transcriptase	GO:0046872,metal ion binding; GO:0003676,nucleic acid binding; GO:0004523,RNA-DNA hybrid ribonuclease activity	PF13966.6:zinc-binding in reverse transcriptase
novel.620	0	0	0	0.95748	1.42707	1.62281	0	0	0	92	153	170	9.84196	5.55393e-11	1.05948e-07	up	NW_018742329.1	7584606	7585885	-	--	--	--	--	uncharacterized protein LOC110689488 [Chenopodium quinoa]	--	--	--	--	PF13456.6:Reverse transcriptase-like
novel.1266	12.0122	12.7465	7.86728	3.63268	3.45301	3.8823	1519	1525	1010	378	400	438	-1.34551	0.000263646	0.030859	down	NW_018742541.1	1116670	1120477	+	--	--	K22696 protein-lysine N-methyltransferase EEF2KMT [EC:2.1.1.-] | (RefSeq) uncharacterized protein LOC108202480 isoform X1 (A)	--	uncharacterized protein LOC110726131 [Chenopodium quinoa]	--	SubName: Full=Mariner transposase {ECO:0000313|EMBL:AFK13835.1};	--	--	PF13358.6:DDE superfamily endonuclease
novel.2940	145.42	139.361	79.6936	34.0993	32.5829	29.1528	12355	11208	6877	2383	2534	2209	-1.66623	2.21339e-05	0.00551072	down	NW_018743199.1	4515573	4519861	-	--	--	--	--	phosphopantothenoylcysteine decarboxylase subunit VHS3-like [Chenopodium quinoa]	--	SubName: Full=Uncharacterized protein {ECO:0000313|EMBL:KNA04719.1};	--	GO:0016021,integral component of membrane	--
novel.5464	0.024818	0.373087	6.80241	0	0	0.033392	2	24	465	0	0	2	-8.01512	0.000417174	0.0410947	down	NW_018744239.1	9264005	9264740	.	--	--	--	--	--	--	--	--	--	--
novel.4014	1.64662	0.555918	9.91251	0	0	0	37	12	226	0	0	0	-8.84274	8.32152e-05	0.0146172	down	NW_018743649.1	1320693	1320938	.	--	--	--	--	uncharacterized protein LOC110738175 [Chenopodium quinoa]	--	SubName: Full=Zinc finger, CCHC-type {ECO:0000313|EMBL:OMO76699.1};	--	GO:0003676,nucleic acid binding; GO:0008270,zinc ion binding	PF10551.9:MULE transposase domain
novel.2738	0.389097	2.0542	4.58838	0	0	0	26	126	302	0	0	0	-9.51284	1.14635e-06	0.000544601	down	NW_018743099.1	1574812	1584786	-	--	--	--	--	--	--	--	--	--	--
novel.7494	0.083563	0.45219	5.76423	0	0.046176	0.047399	8	41	554	0	4	4	-6.38521	0.000267404	0.0310736	down	NW_018745080.1	1695916	1696952	.	--	--	--	--	--	--	--	--	--	--
novel.8123	26.1106	27.1525	39.5824	6.57072	10.6645	7.49356	1966	1936	3027	407	735	504	-1.81983	0.000140365	0.0208004	down	NW_018745435.1	3945	4769	.	--	--	--	--	--	--	--	--	--	--
novel.4397	0.094074	0	0	4.57456	3.69172	3.21532	5	0	0	161	144	122	6.96252	8.83544e-07	0.000439121	up	NW_018743858.1	1397500	1397965	.	--	--	--	--	--	--	--	--	--	--
