# Supplementary material for: Transcriptome and Metabolome Analyses Reveal Mechanisms Underlying the Response of Quinoa Seedlings to Nitrogen Fertilizers
Source: Int J Mol Sci. 2023 Jul 18;24(14):11580. doi: 10.3390/ijms241411580 (PMC10380953; doi:10.3390/ijms241411580)
Supplement: Supplementary file 1 [file ijms-24-11580-s001.zip › Table S8.xlsx]

## Sheet: Sheet1
Table S8 Differential genes of red quinoa in LN vs HN
ID	R1-4_fpkm	R1-5_fpkm	R1-6_fpkm	R3-4_fpkm	R3-5_fpkm	R3-6_fpkm	R1-4_count	R1-5_count	R1-6_count	R3-4_count	R3-5_count	R3-6_count	log2FoldChange	pvalue	padj	regulated	chr	start	end	strand	gene_name	gene_description	KEGG	KEGG pathway	NR	Swissprot	Tremble	KOG	GO	Pfam
gene-CDC77_pgt016	347.6	63.31	8.66	6.98	5.88	14.94	629	108	13	8	10	24	-3.88811	0.000891177	0.0456818	down	NC_034949.1	47057	47705	+	trnL-UAA	--	--	--	--	--	--	--	--	--
gene-CDC77_pgt018	86.24	13.58	34.92	0	0	0	128	19	43	0	0	0	-8.14445	7.22512e-06	0.00161749	down	NC_034949.1	55267	55339	-	trnM-CAU	--	--	--	--	--	--	--	--	--
gene-CDC77_pgt025	104.52	13.77	21.4	0	0.73	0.77	153	19	26	0	1	1	-6.41522	6.1942e-05	0.00799391	down	NC_034949.1	100430	101472	+	trnI-GAU	--	--	--	--	--	--	--	--	--
gene-LOC110681941	22.14	38.74	55.73	10.71	12.33	16.43	865	1427	1807	265	453	570	-1.48825	0.000541092	0.033783	down	NW_018743574.1	1793239	1799828	+	LOC110681941	--	--	--	protein TOM THREE HOMOLOG 1 [Chenopodium quinoa]	RecName: Full=Tobamovirus multiplication protein 3; Short=AtTOM3;	SubName: Full=Uncharacterized protein {ECO:0000313|EMBL:KNA12509.1};	--	GO:0016021,integral component of membrane; GO:0009705,plant-type vacuole membrane; GO:0046786,viral replication complex formation and maintenance	PF06454.11:Protein of unknown function (DUF1084)
gene-LOC110682029	80.63	49.64	58.07	8.51	11.04	13.51	2259	1311	1350	151	291	336	-2.44632	3.04906e-12	5.01707e-09	down	NW_018743574.1	2707671	2709048	+	LOC110682029	--	K19040 E3 ubiquitin-protein ligase ATL10/75/76/77/78 [EC:2.3.2.27] | (RefSeq) RING-H2 finger protein ATL78-like (A)	--	RING-H2 finger protein ATL78-like [Chenopodium quinoa]	RecName: Full=RING-H2 finger protein ATL78; EC=2.3.2.27 {ECO:0000305}; AltName: Full=RING-type E3 ubiquitin transferase ATL78 {ECO:0000305};	SubName: Full=Uncharacterized protein {ECO:0000313|EMBL:KNA25175.1};	FOG: Predicted E3 ubiquitin ligase	GO:0016021,integral component of membrane; GO:0046872,metal ion binding; GO:0061630,ubiquitin protein ligase activity; GO:0043161,proteasome-mediated ubiquitin-dependent protein catabolic process	PF13639.6:Ring finger domain
gene-LOC110682043	26.48	23.76	79.78	4.02	5.2	8.58	1770	1497	4424	170	327	509	-2.84815	1.23744e-06	0.000419823	down	NW_018743574.1	2889677	2896628	+	LOC110682043	--	--	--	uncharacterized protein LOC110682043 isoform X1 [Chenopodium quinoa]	--	--	--	--	--
gene-LOC110682056	42.18	40.72	34.77	8.32	16.69	14.15	1145	1042	783	143	426	341	-1.50731	6.73086e-06	0.00152066	down	NW_018743574.1	2989178	2993897	+	LOC110682056	--	--	--	ribonuclease P protein subunit p25-like protein [Chenopodium quinoa]	--	SubName: Full=Uncharacterized protein {ECO:0000313|EMBL:KNA08122.1};	Uncharacterized conserved protein	GO:0003676,nucleic acid binding	PF01918.21:Alba
gene-LOC110682130	0.47	0.38	0.84	1.03	8.86	11.14	21	16	31	29	371	440	3.62628	2.75534e-05	0.00465336	up	NW_018743574.1	3856143	3859388	-	LOC110682130	--	K00108 choline dehydrogenase [EC:1.1.99.1] | (RefSeq) protein HOTHEAD-like (A)	ko00260: Glycine, serine and threonine metabolism	protein HOTHEAD-like [Chenopodium quinoa]	RecName: Full=Protein HOTHEAD; AltName: Full=Protein ADHESION OF CALYX EDGES; Flags: Precursor;	SubName: Full=Uncharacterized protein {ECO:0000313|EMBL:KNA03049.1};	Glucose dehydrogenase/choline dehydrogenase/mandelonitrile lyase (GMC oxidoreductase family)	GO:0005576,extracellular region; GO:0050660,flavin adenine dinucleotide binding; GO:0046593,mandelonitrile lyase activity; GO:0016614,oxidoreductase activity, acting on CH-OH group of donors; GO:0007267,cell-cell signaling; GO:0009553,embryo sac development; GO:0010430,fatty acid omega-oxidation	PF00732.19:GMC oxidoreductase
gene-LOC110682442	93.07	128.58	229.97	56.33	33.43	43.69	1951	2541	4000	748	659	813	-1.65002	0.000698831	0.0392454	down	NW_018743574.1	7347627	7352260	+	LOC110682442	--	K07955 ADP-ribosylation factor-like protein 8 | (RefSeq) ADP-ribosylation factor-like protein 8a (A)	--	ADP-ribosylation factor-like protein 8a [Chenopodium quinoa]	RecName: Full=ADP-ribosylation factor-like protein 8a {ECO:0000303|PubMed:22174675}; Short=AtARL8a {ECO:0000303|PubMed:22174675}; AltName: Full=ADP-ribosylation factor-like A1C {ECO:0000303|PubMed:12644670}; Short=AtARLA1C {ECO:0000303|PubMed:12644670};	SubName: Full=Uncharacterized protein {ECO:0000313|EMBL:KNA18923.1};	GTP-binding ADP-ribosylation factor-like protein	GO:0005737,cytoplasm; GO:0005829,cytosol; GO:0005794,Golgi apparatus; GO:0031902,late endosome membrane; GO:0005765,lysosomal membrane; GO:0005634,nucleus; GO:0005886,plasma membrane; GO:0009506,plasmodesma; GO:0005819,spindle; GO:0005774,vacuolar membrane; GO:0005773,vacuole; GO:0005525,GTP binding; GO:0007049,cell cycle; GO:0051301,cell division; GO:0007059,chromosome segregation; GO:0051607,de…	PF00025.21:ADP-ribosylation factor family
gene-LOC110682493	32.47	28.37	29.16	10.12	8.72	13	1362	1122	1015	269	344	484	-1.41419	1.01863e-06	0.00036147	down	NW_018743574.1	8037938	8042887	-	LOC110682493	--	K08145 MFS transporter, SP family, solute carrier family 2 (facilitated glucose transporter), member 8 | (RefSeq) sugar transporter ERD6-like 6 (A)	--	sugar transporter ERD6-like 6 [Chenopodium quinoa]	RecName: Full=Sugar transporter ERD6-like 6;	SubName: Full=Uncharacterized protein {ECO:0000313|EMBL:KNA13733.1};	Predicted transporter (major facilitator superfamily)	GO:0005794,Golgi apparatus; GO:0016021,integral component of membrane; GO:0009705,plant-type vacuole membrane; GO:0005774,vacuolar membrane; GO:0005355,glucose transmembrane transporter activity; GO:0005351,carbohydrate:proton symporter activity; GO:0042593,glucose homeostasis; GO:0046323,glucose import; GO:0035428,NA; GO:0010030,positive regulation of seed germination	PF00083.24:Sugar (and other) transporter
gene-LOC110682496	5.3	20.7	12.21	3.32	2.14	3.11	680	2505	1301	270	258	355	-2.00212	0.000135599	0.0131942	down	NW_018742244.1	3577155	3586099	-	LOC110682496	--	K23260 scopoletin glucosyltransferase [EC:2.4.1.128] | (RefSeq) scopoletin glucosyltransferase-like (A)	ko00940: Phenylpropanoid biosynthesis	scopoletin glucosyltransferase-like [Chenopodium quinoa]	RecName: Full=Scopoletin glucosyltransferase; EC=2.4.1.128; AltName: Full=Phenylpropanoid:glucosyltransferase 1;	RecName: Full=Glycosyltransferase {ECO:0000256|RuleBase:RU362057}; EC=2.4.1.- {ECO:0000256|RuleBase:RU362057}; Flags: Fragment;	UDP-glucuronosyl and UDP-glucosyl transferase	GO:0042802,identical protein binding; GO:0050275,scopoletin glucosyltransferase activity; GO:0008152,metabolic process	PF00201.18:UDP-glucoronosyl and UDP-glucosyl transferase
gene-LOC110682525	41.19	38.23	36.11	14.48	13.47	12.89	943	825	686	210	290	262	-1.39239	3.50082e-06	0.000952136	down	NW_018743574.1	8359030	8362633	+	LOC110682525	--	K07252 dolichyldiphosphatase [EC:3.6.1.43] | (RefSeq) lipid phosphate phosphatase epsilon 1, chloroplastic-like (A)	ko00510: N-Glycan biosynthesis	lipid phosphate phosphatase epsilon 1, chloroplastic-like [Chenopodium quinoa]	RecName: Full=Lipid phosphate phosphatase epsilon 2, chloroplastic; Short=AtLPPE2; EC=3.1.3.-; AltName: Full=Phosphatidic acid phosphatase epsilon 2; AltName: Full=Plastidic phosphatidic acid phosphatase epsilon 2; Flags: Precursor;	SubName: Full=Uncharacterized protein {ECO:0000313|EMBL:KNA09294.1};	Dolichyl pyrophosphate phosphatase and related acid phosphatases	GO:0009507,chloroplast; GO:0009706,chloroplast inner membrane; GO:0016021,integral component of membrane; GO:0008195,phosphatidate phosphatase activity; GO:0006651,diacylglycerol biosynthetic process	PF01569.21:PAP2 superfamily
gene-LOC110682531	0.47	0.59	0.34	1.32	2.04	3.64	17	20	10	30	69	116	2.38648	0.00056904	0.0348974	up	NW_018743574.1	8425399	8427784	+	LOC110682531	--	K08900 mitochondrial chaperone BCS1 | (RefSeq) AAA-ATPase At2g18190-like (A)	--	AAA-ATPase At3g50940-like [Chenopodium quinoa]	RecName: Full=Protein HYPER-SENSITIVITY-RELATED 4 {ECO:0000303|PubMed:15181213}; Short=AtHSR4 {ECO:0000303|PubMed:15181213}; EC=3.6.1.3 {ECO:0000250|UniProtKB:Q9FLD5}; AltName: Full=BCS1-like protein;	SubName: Full=Uncharacterized protein {ECO:0000313|EMBL:KNA10079.1};	AAA+-type ATPase	GO:0016021,integral component of membrane; GO:0005740,mitochondrial envelope; GO:0005741,mitochondrial outer membrane; GO:0005739,mitochondrion; GO:0005524,ATP binding; GO:0016887,ATPase activity; GO:0042802,identical protein binding; GO:0008219,cell death; GO:0009626,plant-type hypersensitive response; GO:0009617,response to bacterium; GO:0002237,response to molecule of bacterial origin; GO:0009…	PF00004.29:ATPase family associated with various cellular activities (AAA)
gene-LOC110682960	58.46	49.82	123.9	12.27	21.11	25.09	895	719	1574	119	304	341	-1.95423	0.000128125	0.0127772	down	NW_018743616.1	111132	115639	-	LOC110682960	--	K03868 RING-box protein 1 [EC:2.3.2.32] | (RefSeq) RING-box protein 1a-like (A)	ko03420: Nucleotide excision repair; ko04120: Ubiquitin mediated proteolysis; ko04141: Protein processing in endoplasmic reticulum	RING-box protein 1a-like [Chenopodium quinoa]	RecName: Full=RING-box protein 1a; AltName: Full=At-Rbx1;1; AltName: Full=Protein RING of cullins 1; AltName: Full=RBX1-2; AltName: Full=RBX1a-At;	SubName: Full=RING-box protein 1a isoform X2 {ECO:0000313|RefSeq:XP_016433388.1};	SCF ubiquitin ligase, Rbx1 component	GO:0031462,Cul2-RING ubiquitin ligase complex; GO:0080008,Cul4-RING E3 ubiquitin ligase complex; GO:0031467,Cul7-RING ubiquitin ligase complex; GO:0005737,cytoplasm; GO:0043224,nuclear SCF ubiquitin ligase complex; GO:0097602,cullin family protein binding; GO:0019788,NEDD8 transferase activity; GO:0061630,ubiquitin protein ligase activity; GO:0008270,zinc ion binding; GO:0045116,protein neddylati…	PF12678.7:RING-H2 zinc finger domain
gene-LOC110683018	4.08	6.47	9.87	0.81	0.62	0.62	119	178	239	15	17	16	-3.21986	3.32295e-07	0.000154021	down	NW_018743616.1	1772321	1773755	-	LOC110683018	--	K16274 E3 ubiquitin-protein ligase AIP2 [EC:2.3.2.27] | (RefSeq) E3 ubiquitin-protein ligase AIP2-like (A)	--	E3 ubiquitin-protein ligase SGR9, amyloplastic-like [Chenopodium quinoa]	RecName: Full=E3 ubiquitin-protein ligase SGR9, amyloplastic; EC=2.3.2.27; AltName: Full=Protein SHOOT GRAVITROPISM 9; AltName: Full=RING-type E3 ubiquitin transferase SGR9 {ECO:0000305}; Flags: Precursor;	SubName: Full=Uncharacterized protein {ECO:0000313|EMBL:KNA22040.1};	FOG: Predicted E3 ubiquitin ligase	GO:0009501,amyloplast; GO:0046872,metal ion binding; GO:0061630,ubiquitin protein ligase activity; GO:0004842,ubiquitin-protein transferase activity; GO:0009630,gravitropism; GO:0043161,proteasome-mediated ubiquitin-dependent protein catabolic process; GO:0000209,protein polyubiquitination; GO:0042787,NA	PF13639.6:Ring finger domain
gene-LOC110683031	1.77	3.15	7.88	0	0	0.21	47	79	174	0	0	5	-5.90475	2.81388e-05	0.00465336	down	NW_018743616.1	2135255	2140180	+	LOC110683031	--	K14397 cleavage and polyadenylation specificity factor subunit 5 | (RefSeq) pre-mRNA cleavage factor Im 25 kDa subunit 1-like (A)	ko03015: mRNA surveillance pathway	pre-mRNA cleavage factor Im 25 kDa subunit 1-like [Chenopodium quinoa]	RecName: Full=Pre-mRNA cleavage factor Im 25 kDa subunit 1 {ECO:0000303|PubMed:18479511}; AltName: Full=Cleavage and polyadenylation specificity factor 25 kDa subunit {ECO:0000303|PubMed:16282318}; Short=AtCFI-25 {ECO:0000303|PubMed:16282318}; Short=CFIm-25 {ECO:0000303|PubMed:16282318}; Short=CPSF 25 kDa subunit {ECO:0000305}; AltName: Full=Cleavage and polyadenylation specificity factor subunit…	SubName: Full=Uncharacterized protein {ECO:0000313|EMBL:OWM77279.1};	mRNA cleavage factor I subunit	GO:0005849,mRNA cleavage factor complex; GO:0016787,hydrolase activity; GO:0046872,metal ion binding; GO:0003729,mRNA binding; GO:0006378,mRNA polyadenylation	PF13869.6:Nucleotide hydrolase
gene-LOC110683079	0.37	1.25	0.21	1.78	3.7	8.4	30	95	14	91	281	602	3.01688	0.000146876	0.0138895	up	NW_018743616.1	3191406	3195377	-	LOC110683079	--	K01537 P-type Ca2+ transporter type 2C [EC:7.2.2.10] | (RefSeq) putative calcium-transporting ATPase 13, plasma membrane-type (A)	--	putative calcium-transporting ATPase 13, plasma membrane-type [Chenopodium quinoa]	RecName: Full=Putative calcium-transporting ATPase 13, plasma membrane-type; EC=3.6.3.8; AltName: Full=Ca(2+)-ATPase isoform 13;	RecName: Full=Calcium-transporting ATPase {ECO:0000256|RuleBase:RU361146}; EC=3.6.3.8 {ECO:0000256|RuleBase:RU361146};	Calcium transporting ATPase	GO:0005887,integral component of plasma membrane; GO:0043231,intracellular membrane-bounded organelle; GO:0005524,ATP binding; GO:0005388,calcium-transporting ATPase activity; GO:0005516,calmodulin binding; GO:0046872,metal ion binding	PF00689.21:Cation transporting ATPase, C-terminus
gene-LOC110683259	653.46	448.24	713.8	209.76	165.42	231.19	15093	9760	13680	3069	3593	4740	-1.50202	1.66603e-05	0.00313299	down	NW_018743649.1	675763	687463	+	LOC110683259	--	--	--	plasma membrane-associated cation-binding protein 1-like [Chenopodium quinoa]	RecName: Full=Plasma membrane-associated cation-binding protein 1; Short=AtPCAP1; AltName: Full=Microtubule-destabilizing protein 25;	SubName: Full=Uncharacterized protein {ECO:0000313|EMBL:KNA18787.1};	--	GO:0046658,anchored component of plasma membrane; GO:0009507,chloroplast; GO:0005881,cytoplasmic microtubule; GO:0043657,host cell; GO:0005886,plasma membrane; GO:0009506,plasmodesma; GO:0005773,vacuole; GO:0005509,calcium ion binding; GO:0005516,calmodulin binding; GO:0005507,copper ion binding; GO:0008017,microtubule binding; GO:0005547,phosphatidylinositol-3,4,5-trisphosphate binding; GO:00433…	PF05558.12:DREPP plasma membrane polypeptide
gene-LOC110683383	0.71	0.35	0	5.18	3.61	13.99	13	6	0	60	62	227	4.45589	8.57466e-05	0.00960105	up	NW_018743669.1	407433	408331	+	LOC110683383	--	--	--	uncharacterized protein LOC110683383 [Chenopodium quinoa]	--	SubName: Full=uncharacterized protein LOC108998479 {ECO:0000313|RefSeq:XP_018830577.1};	--	--	--
gene-LOC110683384	7.4	5.99	7.91	13.65	16.64	41.88	185	141	164	216	391	929	1.78499	0.000384753	0.0271713	up	NW_018743669.1	408523	411029	-	LOC110683384	--	--	--	uncharacterized protein LOC110683384 [Chenopodium quinoa]	--	SubName: Full=Uncharacterized protein {ECO:0000313|EMBL:KNA03155.1};	--	--	--
gene-LOC110683401	4.46	4.28	3.68	9.74	14.16	15.62	73	66	50	101	218	227	1.75114	8.79042e-06	0.00189516	up	NW_018743669.1	565095	566468	+	LOC110683401	--	--	--	uncharacterized protein LOC110683401 [Chenopodium quinoa]	--	SubName: Full=Uncharacterized protein {ECO:0000313|EMBL:KNA02968.1};	--	--	--
gene-LOC110683415	11.93	18.73	20.03	2.63	5.95	7.62	529	783	737	74	248	300	-1.58938	0.000465774	0.0307428	down	NW_018743669.1	683961	691551	+	LOC110683415	--	--	--	uncharacterized protein LOC110683415 [Chenopodium quinoa]	--	SubName: Full=Uncharacterized protein {ECO:0000313|EMBL:KNA19468.1};	--	--	--
gene-LOC110683416	0.49	0.47	0.28	1.24	3.45	2.51	21	19	10	34	140	96	2.62399	0.000133118	0.0130769	up	NW_018743669.1	701656	704925	+	LOC110683416	--	K05909 laccase [EC:1.10.3.2] | (RefSeq) laccase-4-like (A)	--	laccase-4-like [Chenopodium quinoa]	RecName: Full=Laccase-4; EC=1.10.3.2; AltName: Full=Benzenediol:oxygen oxidoreductase 4; AltName: Full=Diphenol oxidase 4; AltName: Full=Protein IRREGULAR XYLEM 12; AltName: Full=Urishiol oxidase 4; Flags: Precursor;	RecName: Full=Laccase {ECO:0000256|RuleBase:RU361119}; EC=1.10.3.2 {ECO:0000256|RuleBase:RU361119}; AltName: Full=Benzenediol:oxygen oxidoreductase {ECO:0000256|RuleBase:RU361119}; AltName: Full=Diphenol oxidase {ECO:0000256|RuleBase:RU361119}; AltName: Full=Urishiol oxidase {ECO:0000256|RuleBase:RU361119};	Multicopper oxidases	GO:0048046,apoplast; GO:0005507,copper ion binding; GO:0052716,hydroquinone:oxygen oxidoreductase activity; GO:0016491,oxidoreductase activity; GO:0016722,oxidoreductase activity, oxidizing metal ions; GO:0009809,lignin biosynthetic process; GO:0046274,lignin catabolic process; GO:0009834,plant-type secondary cell wall biogenesis	PF07731.14:Multicopper oxidase
gene-LOC110683482	10.07	8.56	10.04	14.19	28.27	33.57	429	344	355	383	1133	1270	1.45636	0.000105044	0.0110798	up	NW_018743669.1	1294026	1305842	-	LOC110683482	--	K17871 NADH:ubiquinone reductase (non-electrogenic) [EC:1.6.5.9] | (RefSeq) internal alternative NAD(P)H-ubiquinone oxidoreductase A1, mitochondrial-like (A)	--	internal alternative NAD(P)H-ubiquinone oxidoreductase A1, mitochondrial-like [Chenopodium quinoa]	RecName: Full=Internal alternative NAD(P)H-ubiquinone oxidoreductase A1, mitochondrial; EC=1.6.5.9; AltName: Full=Internal alternative NADH dehydrogenase NDA1; AltName: Full=Internal non-phosphorylating NAD(P)H dehydrogenase 1; Short=StNDI1; AltName: Full=NADH:ubiquinone reductase (non-electrogenic) NDA1; Flags: Precursor;	SubName: Full=Uncharacterized protein {ECO:0000313|EMBL:KNA22463.1};	NADH-dehydrogenase (ubiquinone)	GO:0005743,mitochondrial inner membrane; GO:0005759,mitochondrial matrix; GO:0005777,peroxisome; GO:0003959,NADPH dehydrogenase activity; GO:0055114,oxidation-reduction process	PF07992.14:Pyridine nucleotide-disulphide oxidoreductase
gene-LOC110683732	6.15	8.51	8.89	12.24	17.2	19.42	231	301	277	291	607	647	1.13558	0.000318426	0.0239249	up	NW_018743691.1	2038101	2041156	-	LOC110683732	--	K03231 elongation factor 1-alpha | (RefSeq) elongation factor 1-alpha-like (A)	ko03013: RNA transport	elongation factor 1-alpha-like [Chenopodium quinoa]	RecName: Full=Elongation factor 1-alpha; Short=EF-1-alpha;	RecName: Full=Elongation factor 1-alpha {ECO:0000256|RuleBase:RU000325};	Translation elongation factor EF-1 alpha/Tu	GO:0005737,cytoplasm; GO:0005622,intracellular; GO:0005525,GTP binding; GO:0003924,GTPase activity; GO:0003746,translation elongation factor activity	PF00009.27:Elongation factor Tu GTP binding domain
gene-LOC110683793	19.93	30.23	15.99	2.2	3.91	5.65	314	449	209	22	58	79	-2.40156	3.73735e-07	0.000169858	down	NW_018743691.1	3683323	3684912	+	LOC110683793	--	--	--	--	--	--	--	--	--
gene-LOC110683801	0	0	0	0	1.83	0.83	0	0	0	0	179	77	8.89193	0.000330388	0.0243238	up	NW_018743691.1	3798707	3805658	-	LOC110683801	--	--	--	uncharacterized protein LOC110683801 [Chenopodium quinoa]	--	SubName: Full=Uncharacterized protein {ECO:0000313|EMBL:KNA06089.1}; Flags: Fragment;	--	--	PF08646.10:Replication factor-A C terminal domain
gene-LOC110684004	8.65	14.85	6.66	15.38	46.37	40.47	579	937	370	652	2918	2404	1.85108	8.57731e-05	0.00960105	up	NW_018743697.1	244641	251231	-	LOC110684004	--	K03696 ATP-dependent Clp protease ATP-binding subunit ClpC | (RefSeq) ATP-dependent Clp protease ATP-binding subunit ClpA homolog CD4B, chloroplastic (A)	--	ATP-dependent Clp protease ATP-binding subunit ClpA homolog CD4B, chloroplastic [Chenopodium quinoa]	RecName: Full=ATP-dependent Clp protease ATP-binding subunit ClpA homolog CD4B, chloroplastic; Flags: Precursor;	SubName: Full=Uncharacterized protein {ECO:0000313|EMBL:KNA10519.1};	Chaperone HSP104 and related ATP-dependent Clp proteases	GO:0009507,chloroplast; GO:0005524,ATP binding; GO:0019538,protein metabolic process	PF07724.14:AAA domain (Cdc48 subfamily)
gene-LOC110684086	1.93	1.54	2.22	3.53	30.47	23.43	44	33	42	51	653	474	3.35725	9.84683e-06	0.00207724	up	NW_018743697.1	1422635	1423757	+	LOC110684086	--	--	--	LOW QUALITY PROTEIN: osmotin-like protein [Chenopodium quinoa]	RecName: Full=Osmotin-like protein; Flags: Precursor;	SubName: Full=Uncharacterized protein {ECO:0000313|EMBL:KNA11472.1};	--	GO:0005618,cell wall; GO:0005576,extracellular region	PF00314.17:Thaumatin family
gene-LOC110684111	78.69	84.18	127.64	34.05	25.9	40.18	2003	2020	2696	549	620	908	-1.45356	7.73272e-05	0.00908843	down	NW_018743697.1	1660855	1664388	+	LOC110684111	--	K07901 Ras-related protein Rab-8A | (RefSeq) ras-related protein RAB1BV-like (A)	ko04144: Endocytosis	ras-related protein RAB1BV-like [Chenopodium quinoa]	RecName: Full=Ras-related protein RAB1BV;	SubName: Full=Uncharacterized protein {ECO:0000313|EMBL:KNA06223.1};	GTP-binding protein SEC4, small G protein superfamily, and related Ras family GTP-binding proteins	GO:0005886,plasma membrane; GO:0005525,GTP binding; GO:0003924,GTPase activity	PF00071.22:Ras family
gene-LOC110684119	69.53	50.47	247.05	13.71	13.1	32.28	1473	1008	4343	184	261	607	-2.6337	0.000149541	0.0140525	down	NW_018743697.1	1743397	1744800	-	LOC110684119	--	K09873 aquaporin TIP | (RefSeq) aquaporin TIP1-3-like (A)	--	aquaporin TIP1-3-like [Chenopodium quinoa]	RecName: Full=Aquaporin TIP1-3; AltName: Full=Gamma-tonoplast intrinsic protein 3; Short=Gamma-TIP3; AltName: Full=Tonoplast intrinsic protein 1-3; Short=AtTIP1;3;	SubName: Full=Uncharacterized protein {ECO:0000313|EMBL:KNA13069.1};	Aquaporin (major intrinsic protein family)	GO:0042807,central vacuole; GO:0005887,integral component of plasma membrane; GO:0009705,plant-type vacuole membrane; GO:0015204,urea transmembrane transporter activity; GO:0015250,water channel activity; GO:0034220,ion transmembrane transport; GO:0015840,urea transport; GO:0006833,water transport	PF00230.20:Major intrinsic protein
gene-LOC110684212	0	0.04	0	1.32	7.94	6.96	0	1	0	22	197	163	8.55864	2.33749e-08	1.56989e-05	up	NW_018743697.1	2573468	2575465	+	LOC110684212	--	K00430 peroxidase [EC:1.11.1.7] | (RefSeq) peroxidase P7-like (A)	ko00940: Phenylpropanoid biosynthesis	peroxidase P7-like [Chenopodium quinoa]	RecName: Full=Peroxidase 4 {ECO:0000250|UniProtKB:Q42578}; EC=1.11.1.7; Flags: Precursor;	RecName: Full=Peroxidase {ECO:0000256|RuleBase:RU362060, ECO:0000256|SAAS:SAAS00709852}; EC=1.11.1.7 {ECO:0000256|RuleBase:RU362060, ECO:0000256|SAAS:SAAS00709852}; Flags: Fragment;	--	GO:0005576,extracellular region; GO:0020037,heme binding; GO:0046872,metal ion binding; GO:0004601,peroxidase activity; GO:0042744,hydrogen peroxide catabolic process; GO:0006979,response to oxidative stress	PF00141.23:Peroxidase
gene-LOC110684420	7.74	9.68	10.07	14.59	24.62	45.04	191	225	206	228	571	986	1.65881	0.000196862	0.0168712	up	NW_018743697.1	4928067	4930571	-	LOC110684420	--	--	--	dormancy-associated protein homolog 4-like isoform X1 [Chenopodium quinoa]	RecName: Full=Dormancy-associated protein homolog 4 {ECO:0000305}; AltName: Full=DRM1 homolog 4 {ECO:0000305};	SubName: Full=dormancy-associated protein homolog 4 {ECO:0000313|RefSeq:XP_010261733.1};	--	--	PF05564.12:Dormancy/auxin associated protein
gene-LOC110685011	1.28	2.16	1.09	3.99	14.33	23.35	34	54	24	67	357	549	3.24672	1.37428e-06	0.000452646	up	NW_018742287.1	901172	906141	+	LOC110685011	--	K07025 putative hydrolase of the HAD superfamily | (RefSeq) phosphate metabolism protein 8-like (A)	--	phosphate metabolism protein 8-like [Chenopodium quinoa]	--	SubName: Full=Uncharacterized protein {ECO:0000313|EMBL:KNA03929.1};	Haloacid dehalogenase-like hydrolase	GO:0016787,hydrolase activity; GO:0008152,metabolic process	PF13419.6:Haloacid dehalogenase-like hydrolase
gene-LOC110685025	0	0.03	0	0	2.94	2.83	0	1	0	0	112	102	7.65871	0.000712617	0.0396811	up	NW_018743791.1	755218	758088	-	LOC110685025	--	K20617 cytochrome P450 family 71 subfamily A | (RefSeq) cytochrome P450 71A1-like (A)	--	cytochrome P450 76AD1-like [Chenopodium quinoa]	RecName: Full=Cytochrome P450 76AD1 {ECO:0000303|PubMed:22660548}; EC=1.14.-.- {ECO:0000305};	SubName: Full=Cytochrome P450 CYP76AD5 {ECO:0000313|EMBL:AJD87473.1};	Cytochrome P450 CYP2 subfamily	GO:0016021,integral component of membrane; GO:0020037,heme binding; GO:0005506,iron ion binding; GO:0004497,monooxygenase activity; GO:0016705,oxidoreductase activity, acting on paired donors, with incorporation or reduction of molecular oxygen	PF00067.22:Cytochrome P450
gene-LOC110685584	64.23	75.13	193.42	19.35	25.15	22.14	3291	3629	8223	628	1212	1007	-2.2534	1.22067e-05	0.00241993	down	NW_018742204.1	20904532	20908820	-	LOC110685584	--	--	--	vicilin-like seed storage protein At2g18540 [Chenopodium quinoa]	RecName: Full=Vicilin-like seed storage protein At2g18540; AltName: Full=Globulin At2g18540; Flags: Precursor;	SubName: Full=Uncharacterized protein {ECO:0000313|EMBL:KNA20974.1};	--	GO:0045735,nutrient reservoir activity	PF00190.22:Cupin
gene-LOC110685979	1.06	2.19	0.98	5.4	4.3	7.17	66	129	51	214	253	398	2.12218	5.16316e-06	0.00124937	up	NW_018743850.1	3522775	3529415	+	LOC110685979	--	--	--	phosphate transporter PHO1 homolog 1-like isoform X1 [Chenopodium quinoa]	RecName: Full=Phosphate transporter PHO1 homolog 1; AltName: Full=Protein PHO1 homolog 1; Short=AtPHO1;H1;	SubName: Full=Uncharacterized protein {ECO:0000313|EMBL:KNA25584.1}; Flags: Fragment;	Predicted small molecule transporter	GO:0016021,integral component of membrane; GO:0005886,plasma membrane; GO:0005802,trans-Golgi network; GO:0016036,cellular response to phosphate starvation; GO:0006817,phosphate ion transport	PF03124.14:EXS family
gene-LOC110686172	9.97	31.74	39.92	3.02	1.72	3.05	449	1347	1491	86	73	122	-3.27773	3.17948e-08	1.93766e-05	down	NW_018743850.1	7106455	7114031	-	LOC110686172	--	K09587 steroid 22-alpha-hydroxylase [EC:1.14.13.-] | (RefSeq) cytochrome P450 90B1-like (A)	ko00905: Brassinosteroid biosynthesis	cytochrome P450 90B1-like [Chenopodium quinoa]	RecName: Full=Cytochrome P450 90B1; EC=1.14.-.-; AltName: Full=Protein DWARF 4; Short=Dwarf4; AltName: Full=Steroid 22-alpha-hydroxylase;	SubName: Full=Uncharacterized protein {ECO:0000313|EMBL:KNA17053.1}; Flags: Fragment;	Cytochrome P450 CYP4/CYP19/CYP26 subfamilies	GO:0005783,endoplasmic reticulum; GO:0016021,integral component of membrane; GO:0080132,fatty acid alpha-hydroxylase activity; GO:0020037,heme binding; GO:0005506,iron ion binding; GO:0016705,oxidoreductase activity, acting on paired donors, with incorporation or reduction of molecular oxygen; GO:0010012,steroid 22-alpha hydroxylase activity; GO:0016132,brassinosteroid biosynthetic process; GO:00…	PF00067.22:Cytochrome P450
gene-LOC110686217	4.8	2.29	5.17	10.23	34.27	31.77	149	67	133	201	1000	875	2.65493	6.74637e-06	0.00152066	up	NW_018743850.1	7635667	7638907	+	LOC110686217	--	K20858 calcium uniporter protein, mitochondrial | (RefSeq) calcium uniporter protein 2, mitochondrial-like (A)	--	calcium uniporter protein 2, mitochondrial-like [Chenopodium quinoa]	RecName: Full=Calcium uniporter protein 2, mitochondrial; Flags: Precursor;	SubName: Full=Uncharacterized protein {ECO:0000313|EMBL:KNA21080.1};	Uncharacterized conserved protein	GO:0016021,integral component of membrane; GO:0005743,mitochondrial inner membrane; GO:0005262,calcium channel activity; GO:0015292,uniporter activity	PF04678.13:Mitochondrial calcium uniporter
gene-LOC110686491	7.3	13.25	8	3.44	3.64	4.2	288	493	262	86	135	147	-1.22143	0.000842748	0.0440922	down	NW_018743863.1	54948	71145	-	LOC110686491	--	--	--	--	--	--	--	--	--
gene-LOC110686562	1.18	1.23	0.27	1.8	6.01	6.52	68	67	13	66	327	335	2.49152	0.00081728	0.0434505	up	NW_018743878.1	522637	525482	-	LOC110686562	--	K09840 9-cis-epoxycarotenoid dioxygenase [EC:1.13.11.51] | (RefSeq) 9-cis-epoxycarotenoid dioxygenase NCED1, chloroplastic-like (A)	ko00906: Carotenoid biosynthesis	9-cis-epoxycarotenoid dioxygenase NCED1, chloroplastic-like [Chenopodium quinoa]	RecName: Full=9-cis-epoxycarotenoid dioxygenase NCED1, chloroplastic; EC=1.13.11.51; AltName: Full=PvNCED1; Flags: Precursor;	SubName: Full=Uncharacterized protein {ECO:0000313|EMBL:KNA11963.1};	Beta, beta-carotene 15,15'-dioxygenase and related enzymes	GO:0009535,chloroplast thylakoid membrane; GO:0045549,9-cis-epoxycarotenoid dioxygenase activity; GO:0046872,metal ion binding; GO:0009688,abscisic acid biosynthetic process	PF03055.15:Retinal pigment epithelial membrane protein
gene-LOC110686662	1.12	3.29	4.91	6.41	15.77	21.47	67	185	243	242	884	1136	2.26578	0.000440656	0.0297163	up	NW_018743893.1	644985	647916	-	LOC110686662	--	K08332 vacuolar protein 8 | (RefSeq) U-box domain-containing protein 4-like (A)	--	U-box domain-containing protein 19-like [Chenopodium quinoa]	RecName: Full=U-box domain-containing protein 19; EC=2.3.2.27; AltName: Full=Plant U-box protein 19; AltName: Full=RING-type E3 ubiquitin transferase PUB19 {ECO:0000305};	RecName: Full=RING-type E3 ubiquitin transferase {ECO:0000256|SAAS:SAAS00702733}; EC=2.3.2.27 {ECO:0000256|SAAS:SAAS00702733};	FOG: Armadillo/beta-catenin-like repeats	GO:0005737,cytoplasm; GO:0005634,nucleus; GO:0004842,ubiquitin-protein transferase activity; GO:0010029,regulation of seed germination	PF04564.15:U-box domain
gene-LOC110686695	3.01	4.17	3.97	6.75	7.98	10.81	150	196	164	213	374	478	1.28096	7.39346e-05	0.00885621	up	NW_018743893.1	1104941	1109501	-	LOC110686695	--	--	--	aluminum-activated malate transporter 9-like [Chenopodium quinoa]	RecName: Full=Aluminum-activated malate transporter 9; Short=AtALMT9;	SubName: Full=Uncharacterized protein {ECO:0000313|EMBL:KNA17284.1};	Predicted membrane protein	GO:0016021,integral component of membrane; GO:0009705,plant-type vacuole membrane; GO:0005253,anion channel activity; GO:0015140,malate transmembrane transporter activity; GO:0015743,malate transport	PF11744.8:Aluminium activated malate transporter
gene-LOC110686704	2.49	2.78	1.4	4.29	7.04	10.54	131	138	61	143	349	493	1.78675	0.000129787	0.0128649	up	NW_018743893.1	1214310	1219440	-	LOC110686704	--	--	--	calmodulin-binding protein 60 A-like [Chenopodium quinoa]	RecName: Full=Calmodulin-binding protein 60 A {ECO:0000303|PubMed:11782485};	SubName: Full=Uncharacterized protein {ECO:0000313|EMBL:KNA08468.1};	--	GO:0005634,nucleus; GO:0005516,calmodulin binding; GO:0003677,DNA binding; GO:1902478,negative regulation of defense response to bacterium, incompatible interaction; GO:0006355,regulation of transcription, DNA-templated; GO:0006950,response to stress; GO:0006351,transcription, DNA-templated	PF07887.11:Calmodulin binding protein-like
gene-LOC110686916	0	0	0	0	5.33	3.01	0	0	0	0	122	65	8.43552	0.00101671	0.0496425	up	NW_018743906.1	567417	569363	-	LOC110686916	--	--	--	--	--	--	--	--	--
gene-LOC110686932	18.81	19.59	27.19	7.01	6.08	7.82	648	636	777	153	197	239	-1.56168	1.08138e-05	0.00223818	down	NW_018743906.1	1039904	1045950	-	LOC110686932	--	K00451 homogentisate 1,2-dioxygenase [EC:1.13.11.5] | (RefSeq) homogentisate 1,2-dioxygenase-like (A)	ko00350: Tyrosine metabolism	homogentisate 1,2-dioxygenase-like [Chenopodium quinoa]	RecName: Full=Homogentisate 1,2-dioxygenase; EC=1.13.11.5; AltName: Full=Homogentisate oxygenase; AltName: Full=Homogentisic acid oxidase; AltName: Full=Homogentisicase;	SubName: Full=Uncharacterized protein {ECO:0000313|EMBL:KNA10783.1};	Homogentisate 1,2-dioxygenase	GO:0005829,cytosol; GO:0004411,homogentisate 1,2-dioxygenase activity; GO:0046872,metal ion binding; GO:1902000,homogentisate catabolic process; GO:0006559,L-phenylalanine catabolic process; GO:0006572,tyrosine catabolic process	PF04209.13:homogentisate 1,2-dioxygenase
gene-LOC110686971	0	0	0	0	4.77	1.72	0	0	0	0	150	51	8.54677	0.000864906	0.0447325	up	NW_018743906.1	2065779	2087539	-	LOC110686971	--	K02888 large subunit ribosomal protein L21 | (RefSeq) 50S ribosomal protein L21, mitochondrial-like isoform X1 (A)	ko03010: Ribosome	uncharacterized protein LOC110686971 [Chenopodium quinoa]	--	SubName: Full=Uncharacterized protein {ECO:0000313|EMBL:KNA19063.1};	--	GO:0008276,protein methyltransferase activity	PF06325.13:Ribosomal protein L11 methyltransferase (PrmA)
gene-LOC110687217	2.58	3.48	8.99	0	0.21	0.79	92	117	266	0	7	25	-3.95148	0.000703748	0.0394542	down	NW_018743919.1	364483	367647	-	LOC110687217	--	K15014 solute carrier family 29 (equilibrative nucleoside transporter), member 1/2/3 | (RefSeq) equilibrative nucleotide transporter 3-like (A)	--	equilibrative nucleotide transporter 3-like [Chenopodium quinoa]	RecName: Full=Equilibrative nucleotide transporter 3; Short=AtENT3; AltName: Full=Nucleoside transporter ENT3; AltName: Full=Protein FLUOROURIDINE RESISTANT 1;	SubName: Full=Uncharacterized protein {ECO:0000313|EMBL:KNA15145.1};	Nucleoside transporter	GO:0016021,integral component of membrane; GO:0005886,plasma membrane; GO:0005337,nucleoside transmembrane transporter activity; GO:0015858,nucleoside transport	PF01733.18:Nucleoside transporter
gene-LOC110687378	7.83	8.3	15.6	0	1.61	1	124	124	205	0	24	14	-3.5713	0.000833036	0.0436535	down	NW_018743919.1	2811454	2814032	+	LOC110687378	--	K08341 GABA(A) receptor-associated protein | (RefSeq) autophagy-related protein 8C-like (A)	ko04136: Autophagy - other	autophagy-related protein 8C-like [Chenopodium quinoa]	RecName: Full=Autophagy-related protein 8C; AltName: Full=Autophagy-related ubiquitin-like modifier ATG8C; Flags: Precursor;	RecName: Full=Autophagy-related protein {ECO:0000256|RuleBase:RU004384};	Microtubule-associated anchor protein involved in autophagy and membrane trafficking	GO:0000421,autophagosome membrane; GO:0031410,cytoplasmic vesicle; GO:0005874,microtubule; GO:0006914,autophagy; GO:0006995,cellular response to nitrogen starvation; GO:0015031,protein transport	PF02991.16:Autophagy protein Atg8 ubiquitin like
gene-LOC110687413	4.49	2.54	1.46	11.71	9.1	7.68	255	136	69	421	486	387	1.87007	0.000822029	0.0434531	up	NW_018743919.1	3348187	3355951	-	LOC110687413	--	K07767 katanin p60 ATPase-containing subunit A1 [EC:5.6.1.1] | (RefSeq) katanin p60 ATPase-containing subunit A1-like (A)	--	katanin p60 ATPase-containing subunit A1-like [Chenopodium quinoa]	RecName: Full=Katanin p60 ATPase-containing subunit A1 {ECO:0000255|HAMAP-Rule:MF_03023}; Short=Katanin p60 subunit A1 {ECO:0000255|HAMAP-Rule:MF_03023}; EC=3.6.4.3 {ECO:0000255|HAMAP-Rule:MF_03023}; AltName: Full=CAD ATPase; AltName: Full=Katanin-1; Short=Atp60; AltName: Full=Protein BOTERO 1; AltName: Full=Protein ECTOPIC ROOT HAIR 3; AltName: Full=Protein FAT ROOT; AltName: Full=Protein FRAGIL…	SubName: Full=Uncharacterized protein {ECO:0000313|EMBL:KNA05072.1}; Flags: Fragment;	AAA+-type ATPase	GO:0008352,katanin complex; GO:0005874,microtubule; GO:0005634,nucleus; GO:0005524,ATP binding; GO:0008017,microtubule binding; GO:0008568,microtubule-severing ATPase activity; GO:0043622,cortical microtubule organization; GO:0000226,microtubule cytoskeleton organization; GO:0009825,multidimensional cell growth; GO:0009832,plant-type cell wall biogenesis; GO:0010091,trichome branching	PF00004.29:ATPase family associated with various cellular activities (AAA)
gene-LOC110687785	3.81	4.07	4.04	7.21	7.56	9.47	135	136	119	162	252	298	1.1137	0.000491648	0.0319739	up	NW_018743920.1	703582	705329	-	LOC110687785	--	K22794 flavonol-3-O-glucoside/galactoside glucosyltransferase [EC:2.4.1.239 2.4.1.-] | (RefSeq) anthocyanidin 3-O-glucoside 2''-O-glucosyltransferase-like (A)	ko00944: Flavone and flavonol biosynthesis	LOW QUALITY PROTEIN: anthocyanidin 3-O-glucosyltransferase-like [Chenopodium quinoa]	RecName: Full=Anthocyanidin 3-O-glucosyltransferase; EC=2.4.1.115; AltName: Full=Anthocyanin rhamnosyl transferase; AltName: Full=Flavonol 3-O-glucosyltransferase; AltName: Full=UDP-glucose flavonoid 3-O-glucosyltransferase;	SubName: Full=Uncharacterized protein {ECO:0000313|EMBL:KMS97086.1};	UDP-glucuronosyl and UDP-glucosyl transferase	GO:0047213,anthocyanidin 3-O-glucosyltransferase activity; GO:0009718,anthocyanin-containing compound biosynthetic process	PF00201.18:UDP-glucoronosyl and UDP-glucosyl transferase
gene-LOC110687811	0	0.15	0	2.79	2.86	12.05	0	7	0	88	134	533	6.99655	2.07015e-08	1.41931e-05	up	NW_018743920.1	988126	990576	+	LOC110687811	--	--	--	uncharacterized protein LOC110687811 [Chenopodium quinoa]	--	SubName: Full=Uncharacterized protein {ECO:0000313|EMBL:KNA19229.1};	--	--	PF04720.12:PDDEXK-like family of unknown function
gene-LOC110688021	1.9	2.46	1.99	6.38	9.52	13.52	83	101	72	176	390	523	2.2835	1.24941e-09	1.14214e-06	up	NW_018743920.1	4065735	4069548	+	LOC110688021	--	K01051 pectinesterase [EC:3.1.1.11] | (RefSeq) pectinesterase-like (A)	ko00040: Pentose and glucuronate interconversions	pectinesterase-like [Chenopodium quinoa]	RecName: Full=Pectinesterase 3; Short=PE 3; EC=3.1.1.11; AltName: Full=Pectin methylesterase 3; Flags: Precursor;	SubName: Full=pectinesterase-like {ECO:0000313|RefSeq:XP_018850544.1};	--	GO:0005618,cell wall; GO:0005576,extracellular region; GO:0045330,aspartyl esterase activity; GO:0004857,enzyme inhibitor activity; GO:0030599,pectinesterase activity; GO:0042545,cell wall modification; GO:0045490,pectin catabolic process	PF01095.19:Pectinesterase
gene-LOC110688274	19.1	18.34	27.75	6.4	9.79	8.89	900	815	1085	191	434	372	-1.30556	0.000273896	0.021461	down	NW_018743920.1	7126786	7129616	+	LOC110688274	--	K03320 ammonium transporter, Amt family | (RefSeq) ammonium transporter 1 member 3-like isoform X1 (A)	--	ammonium transporter 1 member 3-like isoform X1 [Chenopodium quinoa]	RecName: Full=Ammonium transporter 1 member 3; AltName: Full=LeAMT1;3;	RecName: Full=Ammonium transporter {ECO:0000256|RuleBase:RU362002};	Ammonia permease	GO:0005887,integral component of plasma membrane; GO:0008519,ammonium transmembrane transporter activity; GO:0072488,ammonium transmembrane transport; GO:0015696,ammonium transport; GO:0015695,organic cation transport	PF00909.21:Ammonium Transporter Family
gene-LOC110688331	2.97	2.16	3.19	5.98	12.96	9.55	73	50	65	93	299	208	1.83954	0.000288024	0.0223551	up	NW_018743920.1	7595903	7598332	+	LOC110688331	--	K04802 proliferating cell nuclear antigen | (RefSeq) proliferating cell nuclear antigen (A)	ko03030: DNA replication; ko03410: Base excision repair; ko03420: Nucleotide excision repair; ko03430: Mismatch repair	proliferating cell nuclear antigen [Chenopodium quinoa]	RecName: Full=Proliferating cell nuclear antigen; Short=PCNA;	RecName: Full=Proliferating cell nuclear antigen {ECO:0000256|RuleBase:RU000641};	DNA polymerase delta processivity factor (proliferating cell nuclear antigen)	GO:0005634,nucleus; GO:0003677,DNA binding; GO:0030337,DNA polymerase processivity factor activity; GO:0006260,DNA replication; GO:0006275,regulation of DNA replication	PF02747.15:Proliferating cell nuclear antigen, C-terminal domain
gene-LOC110688345	1.04	4.01	3.56	0	0.11	0.29	20	73	57	0	2	5	-4.32824	0.000652061	0.0376468	down	NW_018743920.1	7763589	7765120	-	LOC110688345	--	K00799 glutathione S-transferase [EC:2.5.1.18] | (RefSeq) glutathione S-transferase U7-like (A)	ko00480: Glutathione metabolism	glutathione S-transferase U7-like [Chenopodium quinoa]	RecName: Full=Glutathione S-transferase U7; Short=AtGSTU7; EC=2.5.1.18; AltName: Full=GST class-tau member 7; AltName: Full=Glutathione S-transferase 25;	SubName: Full=Uncharacterized protein {ECO:0000313|EMBL:OMO90544.1};	Glutathione S-transferase	GO:0005737,cytoplasm; GO:0005829,cytosol; GO:0004364,glutathione transferase activity; GO:0006749,glutathione metabolic process; GO:0009751,response to salicylic acid; GO:0009407,toxin catabolic process	PF02798.20:Glutathione S-transferase, N-terminal domain
gene-LOC110688392	8.61	9.41	11.17	2.57	2.94	5.02	265	273	285	50	85	137	-1.40817	0.000711952	0.0396811	down	NW_018743920.1	8134277	8137256	-	LOC110688392	--	K14016 ubiquitin fusion degradation protein 1 | (RefSeq) ubiquitin recognition factor in ER-associated degradation protein 1-like isoform X1 (A)	ko04141: Protein processing in endoplasmic reticulum	ubiquitin recognition factor in ER-associated degradation protein 1-like isoform X1 [Chenopodium quinoa]	--	SubName: Full=Uncharacterized protein {ECO:0000313|EMBL:KNA22853.1};	Ubiquitin fusion-degradation protein	GO:0006511,ubiquitin-dependent protein catabolic process	PF03152.14:Ubiquitin fusion degradation protein UFD1
gene-LOC110688401	2.78	4.31	2.48	5.58	6.11	7.74	196	286	145	249	405	484	1.13103	0.000518412	0.0328717	up	NW_018743920.1	8223285	8226748	-	LOC110688401	--	K14494 DELLA protein | (RefSeq) DELLA protein GAI-like (A)	ko04075: Plant hormone signal transduction	scarecrow-like protein 33 [Chenopodium quinoa]	RecName: Full=Scarecrow-like protein 33; Short=AtSCL33; AltName: Full=GRAS family protein 12; Short=AtGRAS-12;	SubName: Full=Uncharacterized protein {ECO:0000313|EMBL:KNA19859.1};	--	GO:0005634,nucleus; GO:0003700,DNA-binding transcription factor activity; GO:0043565,sequence-specific DNA binding; GO:0006355,regulation of transcription, DNA-templated; GO:0006351,transcription, DNA-templated	PF03514.14:GRAS domain family
gene-LOC110688538	44.76	66.39	138.15	14.17	18.68	23.75	344	481	881	69	135	162	-2.08336	0.000144558	0.0137096	down	NW_018743920.1	4382786	4383163	+	LOC110688538	--	--	--	auxin-responsive protein SAUR41-like [Chenopodium quinoa]	RecName: Full=Auxin-responsive protein SAUR41 {ECO:0000305}; AltName: Full=Protein SMALL AUXIN UP RNA 41 {ECO:0000303|PubMed:12036261};	SubName: Full=Uncharacterized protein {ECO:0000313|EMBL:KNA03323.1};	--	GO:0005737,cytoplasm; GO:0060918,auxin transport; GO:0009734,auxin-activated signaling pathway; GO:0009958,positive gravitropism; GO:0040008,regulation of growth; GO:0090057,root radial pattern formation	PF02519.14:Auxin responsive protein
gene-LOC110688861	30.8	25.11	29.14	10	10.29	14.23	856	658	672	176	269	351	-1.22618	6.18456e-05	0.00799391	down	NW_018742312.1	151027	155085	+	LOC110688861	--	K09517 DnaJ homolog subfamily B member 11 | (RefSeq) dnaJ protein ERDJ3B-like (A)	ko04141: Protein processing in endoplasmic reticulum	uncharacterized protein LOC110688861 isoform X1 [Chenopodium quinoa]	--	SubName: Full=Uncharacterized protein {ECO:0000313|EMBL:KNA08894.1};	Molecular chaperone (DnaJ superfamily)	--	PF00226.31:DnaJ domain
gene-LOC110688938	2.32	2.38	1.63	6.31	5.68	4.91	134	130	78	231	309	252	1.54308	0.000123634	0.0124424	up	NW_018743946.1	83625	86468	+	LOC110688938	--	K17479 glutaredoxin domain-containing cysteine-rich protein 1 | (RefSeq) uncharacterized protein At5g39865-like (A)	--	uncharacterized protein At3g28850-like [Chenopodium quinoa]	RecName: Full=Uncharacterized protein At3g28850;	SubName: Full=Uncharacterized protein {ECO:0000313|EMBL:KNA11723.1};	Glutaredoxin-related protein	GO:0005886,plasma membrane; GO:0009055,electron transfer activity; GO:0015035,protein disulfide oxidoreductase activity; GO:0045454,cell redox homeostasis	PF00462.24:Glutaredoxin
gene-LOC110688951	1.35	2.74	2.46	4.55	6.87	8.29	45	86	68	96	215	245	1.67712	0.000424312	0.0291551	up	NW_018743946.1	762003	765641	+	LOC110688951	--	K09422 transcription factor MYB, plant | (RefSeq) myb-related protein 306-like (A)	--	myb-related protein 306-like [Chenopodium quinoa]	RecName: Full=Transcription factor MYB30 {ECO:0000303|PubMed:10929106}; AltName: Full=Myb-related protein 30 {ECO:0000303|PubMed:10929106}; Short=AtMYB30 {ECO:0000303|PubMed:10929106};	SubName: Full=Uncharacterized protein {ECO:0000313|EMBL:KNA13865.1};	Transcription factor, Myb superfamily	GO:0005634,nucleus; GO:0003700,DNA-binding transcription factor activity; GO:0000981,DNA-binding transcription factor activity, RNA polymerase II-specific; GO:0043565,sequence-specific DNA binding; GO:0001135,RNA polymerase II transcription regulator recruiting activity; GO:0044212,transcription regulatory region DNA binding; GO:0030154,cell differentiation; GO:0009626,plant-type hypersensitive r…	PF00249.31:Myb-like DNA-binding domain
gene-LOC110689287	84.28	76.71	115.68	31.93	32.65	52.84	1592	1366	1813	382	580	886	-1.17667	0.000800648	0.0429829	down	NW_018743955.1	6608569	6611353	-	LOC110689287	--	--	--	uncharacterized protein LOC110689287 [Chenopodium quinoa]	--	SubName: Full=Uncharacterized protein {ECO:0000313|EMBL:KNA06830.1};	--	GO:0016021,integral component of membrane	PF05514.11:HR-like lesion-inducing
gene-LOC110689303	20.7	31.19	42.32	11.35	6.25	10.36	743	1055	1260	258	211	330	-1.64386	0.000347734	0.0252062	down	NW_018743955.1	6740970	6747051	+	LOC110689303	--	--	--	uncharacterized Rho GTPase-activating protein At5g61530-like [Chenopodium quinoa]	RecName: Full=Uncharacterized Rho GTPase-activating protein At5g61530;	SubName: Full=Uncharacterized protein {ECO:0000313|EMBL:KMS98906.1};	GTPase-activator protein	GO:0005737,cytoplasm; GO:0005096,GTPase activator activity; GO:0043087,regulation of GTPase activity; GO:0007165,signal transduction	PF00620.27:RhoGAP domain
gene-LOC110689325	15.13	24.68	19.32	44.88	49.55	75.62	404	621	428	759	1244	1792	1.61405	6.26427e-08	3.55433e-05	up	NW_018743955.1	6960885	6962197	+	LOC110689325	--	K20604 mitogen-activated protein kinase kinase 9 [EC:2.7.12.2] | (RefSeq) mitogen-activated protein kinase kinase 9-like (A)	ko04016: MAPK signaling pathway - plant	mitogen-activated protein kinase kinase 9-like [Chenopodium quinoa]	RecName: Full=Mitogen-activated protein kinase kinase 9; Short=AtMKK9; Short=MAP kinase kinase 9; EC=2.7.12.2;	SubName: Full=Uncharacterized protein {ECO:0000313|EMBL:KNA17854.1};	Mitogen-activated protein kinase kinase (MAP2K)	GO:0005737,cytoplasm; GO:0005634,nucleus; GO:0005524,ATP binding; GO:0004708,MAP kinase kinase activity; GO:0030295,protein kinase activator activity; GO:0004674,protein serine/threonine kinase activity; GO:0010120,camalexin biosynthetic process; GO:0009693,ethylene biosynthetic process; GO:0009873,ethylene-activated signaling pathway; GO:0010150,leaf senescence; GO:0045893,positive regulation of…	PF00069.25:Protein kinase domain
gene-LOC110689626	2.68	2.33	1.18	5.23	7.55	11.75	118	97	43	146	313	460	2.05453	3.5879e-05	0.00562258	up	NW_018743975.1	295660	297828	+	LOC110689626	--	--	--	--	--	--	--	--	--
gene-LOC110689809	12.13	13.29	10.61	3.81	4.86	4.04	186	192	135	37	70	55	-1.39803	0.000665554	0.0379596	down	NW_018743977.1	3441714	3443782	-	LOC110689809	--	--	--	--	--	--	--	--	--
gene-LOC110690003	0.89	1.68	6.94	0	0.09	0.16	55	98	357	0	5	9	-5.25165	8.80986e-06	0.00189516	down	NW_018743979.1	1961385	1980564	+	LOC110690003	--	--	--	protein NLP6-like [Chenopodium quinoa]	RecName: Full=Protein NLP6; Short=AtNLP6; AltName: Full=NIN-like protein 6; AltName: Full=Nodule inception protein-like protein 6;	SubName: Full=Uncharacterized protein {ECO:0000313|EMBL:KNA07705.1};	--	GO:0005634,nucleus; GO:0003677,DNA binding; GO:0003700,DNA-binding transcription factor activity; GO:0006351,transcription, DNA-templated	PF02042.15:RWP-RK domain
gene-LOC110690010	0.53	0.45	0.46	1.18	3.33	1.56	35	28	25	49	205	91	2.15382	0.000895974	0.0458563	up	NW_018743979.1	2291120	2294430	-	LOC110690010	--	--	--	uncharacterized protein LOC110690010 [Chenopodium quinoa]	--	SubName: Full=Uncharacterized protein {ECO:0000313|EMBL:KMS96161.1};	--	GO:0005886,plasma membrane	PF13519.6:von Willebrand factor type A domain
gene-LOC110690119	12.33	11.99	26.43	2.89	5.27	4.73	276	253	491	41	111	94	-1.92152	0.000433534	0.0293563	down	NW_018743987.1	840696	846591	+	LOC110690119	--	K12948 signal peptidase complex subunit 3 [EC:3.4.-.-] | (RefSeq) signal peptidase complex subunit 3B-like (A)	ko03060: Protein export	signal peptidase complex subunit 3B-like [Chenopodium quinoa]	RecName: Full=Signal peptidase complex subunit 3B; EC=3.4.-.-; AltName: Full=Microsomal signal peptidase 22 kDa subunit; Short=SPC22; Short=SPase 22 kDa subunit;	SubName: Full=Uncharacterized protein {ECO:0000313|EMBL:KNA19080.1};	Signal peptidase complex subunit	GO:0005618,cell wall; GO:0016021,integral component of membrane; GO:0031090,organelle membrane; GO:0005787,signal peptidase complex; GO:0008233,peptidase activity; GO:0045047,protein targeting to ER; GO:0006465,signal peptide processing	PF04573.12:Signal peptidase subunit
gene-LOC110690305	24.56	18.55	26.05	8.49	8.77	10.95	1018	725	896	223	342	403	-1.21912	0.000197735	0.016902	down	NW_018744026.1	4746084	4777914	+	LOC110690305	--	K16054 methylthioribulose 1-phosphate dehydratase / enolase-phosphatase E1 [EC:4.2.1.109 3.1.3.77] | (RefSeq) probable bifunctional methylthioribulose-1-phosphate dehydratase/enolase-phosphatase E1 1 (A)	ko00270: Cysteine and methionine metabolism	probable bifunctional methylthioribulose-1-phosphate dehydratase/enolase-phosphatase E1 1 [Chenopodium quinoa]	RecName: Full=Probable bifunctional methylthioribulose-1-phosphate dehydratase/enolase-phosphatase E1 1 {ECO:0000255|HAMAP-Rule:MF_03118}; Includes: RecName: Full=Methylthioribulose-1-phosphate dehydratase {ECO:0000255|HAMAP-Rule:MF_03118}; Short=MTRu-1-P dehydratase {ECO:0000255|HAMAP-Rule:MF_03118}; EC=4.2.1.109 {ECO:0000255|HAMAP-Rule:MF_03118}; Includes: RecName: Full=Enolase-phosphatase E1 {…	RecName: Full=Probable bifunctional methylthioribulose-1-phosphate dehydratase/enolase-phosphatase E1 {ECO:0000256|HAMAP-Rule:MF_03118}; Includes: RecName: Full=Enolase-phosphatase E1 {ECO:0000256|HAMAP-Rule:MF_03118}; EC=3.1.3.77 {ECO:0000256|HAMAP-Rule:MF_03118}; AltName: Full=2,3-diketo-5-methylthio-1-phosphopentane phosphatase {ECO:0000256|HAMAP-Rule:MF_03118}; Includes: RecName: Full=Methylt…	Enolase-phosphatase E-1	GO:0005737,cytoplasm; GO:0043874,acireductone synthase activity; GO:0000287,magnesium ion binding; GO:0046570,methylthioribulose 1-phosphate dehydratase activity; GO:0019509,L-methionine salvage from methylthioadenosine	PF00596.21:Class II Aldolase and Adducin N-terminal domain
gene-LOC110690389	0.36	1.04	0.94	4.12	4	4.06	21	58	46	154	222	213	2.51001	5.63504e-06	0.00133413	up	NW_018744041.1	147776	150966	+	LOC110690389	--	--	--	uncharacterized protein LOC110690389 [Chenopodium quinoa]	--	SubName: Full=Uncharacterized protein {ECO:0000313|EMBL:CAN80919.1};	FOG: Transposon-encoded proteins with TYA, reverse transcriptase, integrase domains in various combinations	GO:0003676,nucleic acid binding; GO:0015074,DNA integration	PF14244.6:gag-polypeptide of LTR copia-type
gene-LOC110690390	18.09	9.14	12.28	17.62	104.71	84.69	355	169	200	219	1932	1475	2.4069	0.000193361	0.0167455	up	NW_018744041.1	278696	279660	+	LOC110690390	--	--	--	miraculin-like [Chenopodium quinoa]	RecName: Full=Miraculin; Short=MIR; Flags: Precursor;	SubName: Full=Uncharacterized protein {ECO:0000313|EMBL:KNA03096.1};	--	GO:0004866,endopeptidase inhibitor activity	PF00197.18:Trypsin and protease inhibitor
gene-LOC110690651	3.77	5.11	3.32	1.37	0.98	0.9	208	266	152	48	51	44	-1.77051	0.000241078	0.0193503	down	NW_018744062.1	457664	470302	+	LOC110690651	--	--	--	uncharacterized protein LOC110690651 [Chenopodium quinoa]	--	SubName: Full=Uncharacterized protein {ECO:0000313|EMBL:KNA07318.1}; Flags: Fragment;	--	--	--
gene-LOC110690671	51.81	44.12	181.09	180.41	1230.01	1233.12	573	460	1662	1264	12794	12107	3.23564	3.27214e-05	0.00522732	up	NW_018744062.1	908841	909663	+	LOC110690671	--	--	--	non-specific lipid-transfer protein-like [Chenopodium quinoa]	RecName: Full=Non-specific lipid-transfer protein; Short=LTP; Flags: Precursor;	RecName: Full=Non-specific lipid-transfer protein {ECO:0000256|RuleBase:RU000628};	--	GO:0008289,lipid binding; GO:0050832,defense response to fungus; GO:0031640,killing of cells of other organism; GO:0006869,lipid transport	PF00234.22:Protease inhibitor/seed storage/LTP family
gene-LOC110690675	13.11	0.86	9.04	11.09	186.21	162.11	194	12	111	104	2592	2130	3.92313	0.00016955	0.0152869	up	NW_018744062.1	932564	933534	+	LOC110690675	--	--	--	non-specific lipid-transfer protein-like [Chenopodium quinoa]	RecName: Full=Non-specific lipid-transfer protein; Short=LTP; Flags: Precursor;	RecName: Full=Non-specific lipid-transfer protein {ECO:0000256|RuleBase:RU000628};	--	GO:0008289,lipid binding; GO:0050832,defense response to fungus; GO:0031640,killing of cells of other organism; GO:0006869,lipid transport	PF00234.22:Protease inhibitor/seed storage/LTP family
gene-LOC110690680	10.08	14.53	18.24	4.19	4.39	5.44	315	428	473	83	129	151	-1.52371	0.000119595	0.01211	down	NW_018744062.1	990732	992268	+	LOC110690680	--	K19040 E3 ubiquitin-protein ligase ATL10/75/76/77/78 [EC:2.3.2.27] | (RefSeq) RING-H2 finger protein ATL74-like (A)	--	RING-H2 finger protein ATL74-like [Chenopodium quinoa]	RecName: Full=RING-H2 finger protein ATL74; EC=2.3.2.27 {ECO:0000305}; AltName: Full=RING-type E3 ubiquitin transferase ATL74 {ECO:0000305};	SubName: Full=Uncharacterized protein {ECO:0000313|EMBL:KNA06290.1};	FOG: Predicted E3 ubiquitin ligase	GO:0016021,integral component of membrane; GO:0046872,metal ion binding; GO:0061630,ubiquitin protein ligase activity; GO:0043161,proteasome-mediated ubiquitin-dependent protein catabolic process	PF13639.6:Ring finger domain
gene-LOC110690949	21.17	26.22	30.01	10.82	9.76	11.85	692	808	814	224	300	344	-1.15742	0.000191781	0.0166526	down	NW_018744066.1	1646421	1651787	+	LOC110690949	--	K04124 gibberellin 3beta-dioxygenase [EC:1.14.11.15] | (RefSeq) gibberellin 3-beta-dioxygenase 1-like (A)	ko00904: Diterpenoid biosynthesis	2-oxoglutarate-dependent dioxygenase mpl2-like isoform X1 [Chenopodium quinoa]	RecName: Full=Probable 2-oxoglutarate-dependent dioxygenase At3g50210; EC=1.14.11.-;	SubName: Full=Uncharacterized protein {ECO:0000313|EMBL:KNA20099.1};	Iron/ascorbate family oxidoreductases	GO:0051213,dioxygenase activity; GO:0046872,metal ion binding; GO:0009267,cellular response to starvation	PF14226.6:non-haem dioxygenase in morphine synthesis N-terminal
gene-LOC110691004	4.71	5.68	2.69	6.22	20.3	14.22	287	326	136	240	1163	769	1.72572	0.000721191	0.040023	up	NW_018744066.1	2447404	2451089	+	LOC110691004	--	K18213 proteinaceous RNase P [EC:3.1.26.5] | (RefSeq) proteinaceous RNase P 1, chloroplastic/mitochondrial-like isoform X1 (A)	ko03013: RNA transport	proteinaceous RNase P 1, chloroplastic/mitochondrial-like isoform X1 [Chenopodium quinoa]	RecName: Full=Proteinaceous RNase P 1, chloroplastic/mitochondrial; EC=3.1.26.5 {ECO:0000269|PubMed:20473316, ECO:0000269|PubMed:22549728, ECO:0000269|PubMed:22991464}; AltName: Full=Pentatricopeptide repeat-containing protein At2g32230; Flags: Precursor;	SubName: Full=Uncharacterized protein {ECO:0000313|EMBL:KNA24841.1};	Uncharacterized membrane protein, predicted efflux pump	GO:0009507,chloroplast; GO:0005739,mitochondrion; GO:0046872,metal ion binding; GO:0004526,ribonuclease P activity; GO:0001682,tRNA 5'-leader removal; GO:0008033,tRNA processing	PF16953.5:Protein-only RNase P
gene-LOC110691012	6.59	6.53	3.81	11.25	21.59	16.47	196	183	94	212	604	435	1.6373	8.21739e-05	0.00952204	up	NW_018744066.1	2516251	2525236	-	LOC110691012	--	K03100 signal peptidase I [EC:3.4.21.89] | (RefSeq) chloroplast processing peptidase-like (A)	ko03060: Protein export	chloroplast processing peptidase-like [Chenopodium quinoa]	RecName: Full=Chloroplast processing peptidase; EC=3.4.21.89; AltName: Full=Signal peptidase I-3; Flags: Precursor;	SubName: Full=Uncharacterized protein {ECO:0000313|EMBL:KNA19808.1};	Mitochondrial inner membrane protease, subunit IMP1	GO:0009507,chloroplast; GO:0009941,chloroplast envelope; GO:0009535,chloroplast thylakoid membrane; GO:0016021,integral component of membrane; GO:0009526,plastid envelope; GO:0055035,plastid thylakoid membrane; GO:0008233,peptidase activity; GO:0008236,serine-type peptidase activity; GO:0051604,protein maturation; GO:0010027,thylakoid membrane organization	PF10502.9:Signal peptidase, peptidase S26
gene-LOC110691181	12.75	12.97	12.48	4.28	5.69	6.42	517	496	420	110	217	231	-1.13705	4.8909e-05	0.00687841	down	NW_018744069.1	1195989	1202695	+	LOC110691181	--	K08145 MFS transporter, SP family, solute carrier family 2 (facilitated glucose transporter), member 8 | (RefSeq) sugar transporter ERD6-like 6 (A)	--	sugar transporter ERD6-like 6 [Chenopodium quinoa]	RecName: Full=Sugar transporter ERD6-like 6;	SubName: Full=Uncharacterized protein {ECO:0000313|EMBL:KNA12018.1};	Predicted transporter (major facilitator superfamily)	GO:0005794,Golgi apparatus; GO:0016021,integral component of membrane; GO:0009705,plant-type vacuole membrane; GO:0005774,vacuolar membrane; GO:0005355,glucose transmembrane transporter activity; GO:0005351,carbohydrate:proton symporter activity; GO:0042593,glucose homeostasis; GO:0046323,glucose import; GO:0035428,NA; GO:0010030,positive regulation of seed germination	PF00083.24:Sugar (and other) transporter
gene-LOC110691392	14.53	5.55	20.53	0	0.14	0.91	325	117	381	0	3	18	-5.32016	1.22676e-06	0.000419823	down	NW_018744080.1	408660	410718	-	LOC110691392	--	--	--	--	--	--	--	--	--
gene-LOC110691450	17.75	19.18	21.94	6.43	7.57	11.67	706	719	724	162	283	412	-1.13025	0.00044423	0.029878	down	NW_018744080.1	1928111	1932886	-	LOC110691450	--	K03797 carboxyl-terminal processing protease [EC:3.4.21.102] | (RefSeq) carboxyl-terminal-processing peptidase 3, chloroplastic-like (A)	--	carboxyl-terminal-processing peptidase 3, chloroplastic-like [Chenopodium quinoa]	RecName: Full=Carboxyl-terminal-processing peptidase 3, chloroplastic; EC=3.4.21.102; AltName: Full=D1 C-terminal processing protease 3; AltName: Full=Photosystem II D1 protein processing peptidase 3; Flags: Precursor;	SubName: Full=Uncharacterized protein {ECO:0000313|EMBL:KNA04809.1};	--	GO:0009543,chloroplast thylakoid lumen; GO:0016020,membrane; GO:0004175,endopeptidase activity; GO:0008236,serine-type peptidase activity	PF03572.18:Peptidase family S41
gene-LOC110691645	41.43	60.75	54.25	21.32	18.44	25.73	497	687	540	162	208	274	-1.1536	0.000221786	0.0182469	down	NW_018744080.1	2338702	2339864	+	LOC110691645	--	--	--	--	--	--	--	--	--
gene-LOC110691801	23.88	31.07	32.08	4.28	7.28	14.4	820	1006	914	93	235	439	-1.70514	0.000175188	0.0155818	down	NW_018744092.1	1810096	1812366	-	LOC110691801	--	--	--	fasciclin-like arabinogalactan protein 2 [Chenopodium quinoa]	RecName: Full=Fasciclin-like arabinogalactan protein 2; Flags: Precursor;	SubName: Full=Uncharacterized protein {ECO:0000313|EMBL:KNA19187.1};	--	GO:0031225,anchored component of membrane; GO:0046658,anchored component of plasma membrane; GO:0016020,membrane; GO:0005886,plasma membrane; GO:0005774,vacuolar membrane	PF02469.22:Fasciclin domain
gene-LOC110691903	0.44	2.67	2.28	9.17	9.7	7.84	16	92	69	212	333	254	2.45362	0.000421281	0.0291042	up	NW_018744092.1	3678367	3683503	+	LOC110691903	--	K18045 tyrosine-protein phosphatase SIW14 [EC:3.1.3.48] | (RefSeq) probable tyrosine-protein phosphatase At1g05000 isoform X1 (A)	--	probable tyrosine-protein phosphatase At1g05000 isoform X1 [Chenopodium quinoa]	RecName: Full=Tyrosine-protein phosphatase DSP2 {ECO:0000305}; EC=3.1.3.48 {ECO:0000255|PROSITE-ProRule:PRU10044, ECO:0000269|PubMed:21409566}; AltName: Full=Protein PLANT AND FUNGI ATYPICAL DUAL-SPECIFICITY PHOSPHATASE 2 {ECO:0000303|PubMed:21409566}; Short=AtPFA-DSP2 {ECO:0000303|PubMed:21409566};	SubName: Full=Uncharacterized protein {ECO:0000313|EMBL:KNA15366.1};	Predicted protein tyrosine phosphatase	GO:0005737,cytoplasm; GO:0016791,phosphatase activity; GO:0004725,protein tyrosine phosphatase activity	PF03162.13:Tyrosine phosphatase family
gene-LOC110691979	136.87	184.04	207.17	80.08	53.54	62.94	5755	7295	7228	2133	2117	2349	-1.30267	0.00021404	0.0177427	down	NW_018744092.1	4828513	4832719	+	LOC110691979	--	K09828 Delta24-sterol reductase [EC:1.3.1.72 1.3.1.-] | (RefSeq) delta(24)-sterol reductase-like (A)	ko00100: Steroid biosynthesis	delta(24)-sterol reductase-like [Chenopodium quinoa]	RecName: Full=Delta(24)-sterol reductase; EC=1.3.1.72; AltName: Full=Cell elongation protein diminuto;	SubName: Full=Uncharacterized protein {ECO:0000313|EMBL:KNA18210.1};	FAD-binding protein DIMINUTO	GO:0016021,integral component of membrane; GO:0005516,calmodulin binding; GO:0050614,delta24-sterol reductase activity; GO:0050660,flavin adenine dinucleotide binding; GO:0016614,oxidoreductase activity, acting on CH-OH group of donors	PF01565.23:FAD binding domain
gene-LOC110692134	57.04	64.2	76.24	31.5	20.51	27.88	2330	2472	2584	815	788	1011	-1.19486	0.000507792	0.0324484	down	NW_018744093.1	2280411	2291373	+	LOC110692134	--	K23544 serine incorporator 1/3 | (RefSeq) probable serine incorporator (A)	--	probable serine incorporator [Chenopodium quinoa]	--	SubName: Full=Uncharacterized protein {ECO:0000313|EMBL:KNA12416.1};	Tumor differentially expressed (TDE) protein	GO:0016021,integral component of membrane	PF03348.15:Serine incorporator (Serinc)
gene-LOC110692403	1.15	3.11	1.43	2.72	8.91	13.75	60	153	62	90	438	638	2.22802	0.000649701	0.0376352	up	NW_018744111.1	2281817	2286303	+	LOC110692403	--	K05658 ATP-binding cassette, subfamily B (MDR/TAP), member 1 [EC:7.6.2.2] | (RefSeq) ABC transporter B family member 15-like (A)	ko02010: ABC transporters	ABC transporter G family member 11-like, partial [Chenopodium quinoa]	RecName: Full=ABC transporter G family member 11; Short=ABC transporter ABCG.11; Short=AtABCG11; AltName: Full=Protein CUTICULAR DEFECT AND ORGAN FUSION 1; AltName: Full=Protein DESPERADO; AltName: Full=Protein PERMEABLE LEAVES 1; AltName: Full=White-brown complex homolog protein 11; Short=AtWBC11;	SubName: Full=Uncharacterized protein {ECO:0000313|EMBL:KNA18038.1};	Transporter, ABC superfamily (Breast cancer resistance protein)	GO:0009897,external side of plasma membrane; GO:0016021,integral component of membrane; GO:0005886,plasma membrane; GO:0005524,ATP binding; GO:0042626,ATPase activity, coupled to transmembrane movement of substances; GO:0015245,fatty acid transmembrane transporter activity; GO:0042803,protein homodimerization activity; GO:0010588,cotyledon vascular tissue pattern formation; GO:0080051,cutin trans…	PF01061.24:ABC-2 type transporter
gene-LOC110692677	21.02	57.06	90.1	12.39	9.34	13.42	383	980	1362	143	160	217	-2.16243	0.000206425	0.0174438	down	NW_018744128.1	324400	325295	+	LOC110692677	--	--	--	classical arabinogalactan protein 10-like [Chenopodium quinoa]	--	--	--	--	--
gene-LOC110692703	600.46	626.88	737.15	319.36	196.73	228.5	10243	10081	10434	3451	3156	3460	-1.27548	0.000402573	0.0280684	down	NW_018744128.1	677868	679565	+	LOC110692703	--	K11253 histone H3 | (RefSeq) histone H3.3 (A)	--	hypothetical protein PHYPA_023132 [Physcomitrella patens]	RecName: Full=Histone H3.3;	RecName: Full=Histone H3 {ECO:0000256|RuleBase:RU004471};	Histones H3 and H4	GO:0000786,nucleosome; GO:0005634,nucleus; GO:0003677,DNA binding; GO:0046982,protein heterodimerization activity	PF00125.24:Core histone H2A/H2B/H3/H4
gene-LOC110692766	1.45	2.28	0.58	0	0.12	0.13	78	116	26	0	6	6	-4.02332	0.00035098	0.0253855	down	NW_018744128.1	1600942	1611375	-	LOC110692766	--	--	--	--	--	--	--	--	--
gene-LOC110692935	20.62	39.86	14.59	47.23	55	67.29	991	1806	582	1438	2486	2871	1.30251	0.000770841	0.0417918	up	NW_018744137.1	387075	391657	-	LOC110692935	--	--	--	NAC domain-containing protein 14-like [Chenopodium quinoa]	RecName: Full=Protein NTM1-like 9 {ECO:0000303|PubMed:17158162}; AltName: Full=Calmodulin-binding NAC protein {ECO:0000303|PubMed:17947243};	SubName: Full=Uncharacterized protein {ECO:0000313|EMBL:KNA23598.1};	--	GO:0005789,endoplasmic reticulum membrane; GO:0016021,integral component of membrane; GO:0005634,nucleus; GO:0005886,plasma membrane; GO:0005516,calmodulin binding; GO:0003700,DNA-binding transcription factor activity; GO:0044212,transcription regulatory region DNA binding; GO:0071470,cellular response to osmotic stress; GO:0045892,negative regulation of transcription, DNA-templated; GO:1900426,p…	PF02365.15:No apical meristem (NAM) protein
gene-LOC110692954	142.44	187.3	156.39	81.95	63.79	54.13	3652	4527	3327	1331	1538	1232	-1.14227	0.000674567	0.0381432	down	NW_018744137.1	518487	523082	+	LOC110692954	--	--	--	uncharacterized protein LOC110692954 [Chenopodium quinoa]	--	SubName: Full=Uncharacterized protein {ECO:0000313|EMBL:KNA10593.1};	--	GO:0016021,integral component of membrane	PF02466.19:Tim17/Tim22/Tim23/Pmp24 family
gene-LOC110692978	169.03	200.42	211.69	86.94	56.06	59.7	3014	3369	3132	982	940	945	-1.38889	0.000115779	0.0119817	down	NW_018744137.1	819832	821835	+	LOC110692978	--	--	--	non-symbiotic hemoglobin 2-like [Chenopodium quinoa]	RecName: Full=Non-symbiotic hemoglobin 2; AltName: Full=Hb2; AltName: Full=SOLly GLB2;	SubName: Full=Non-symbiotic hemoglobin class 2 {ECO:0000313|EMBL:AHB20279.1};	Globins and related hemoproteins	GO:0020037,heme binding; GO:0046872,metal ion binding; GO:0019825,oxygen binding; GO:0006631,fatty acid metabolic process; GO:0019432,triglyceride biosynthetic process	PF00042.22:Globin
gene-LOC110692997	10.57	2.69	3.61	12.83	48.1	27.77	342	82	97	263	1464	798	2.42799	0.000568361	0.0348974	up	NW_018744137.1	1031035	1034612	+	LOC110692997	--	K12930 anthocyanidin 3-O-glucosyltransferase [EC:2.4.1.115] | (RefSeq) anthocyanidin 3-O-glucosyltransferase 7-like (A)	ko00942: Anthocyanin biosynthesis	anthocyanidin 3-O-glucosyltransferase 7-like [Chenopodium quinoa]	RecName: Full=Anthocyanidin 3-O-glucosyltransferase 2; EC=2.4.1.115 {ECO:0000269|PubMed:9535914}; AltName: Full=Flavonol 3-O-glucosyltransferase; AltName: Full=UDP-glucose flavonoid 3-O-glucosyltransferase;	SubName: Full=UDP-glucose:flavonoid 3-O-glucosyltransferase {ECO:0000313|EMBL:AMQ23635.1};	UDP-glucuronosyl and UDP-glucosyl transferase	GO:0047213,anthocyanidin 3-O-glucosyltransferase activity; GO:0009718,anthocyanin-containing compound biosynthetic process; GO:0033485,cyanidin 3-O-glucoside biosynthetic process; GO:0033330,kaempferol O-glucoside biosynthetic process; GO:0033303,quercetin O-glucoside biosynthetic process	PF00201.18:UDP-glucoronosyl and UDP-glucosyl transferase
gene-LOC110693156	0.58	4.66	0.98	3.35	21.12	19.87	28	211	39	102	954	847	2.95493	0.000750258	0.0410819	up	NW_018744143.1	517192	521551	+	LOC110693156	--	K14494 DELLA protein | (RefSeq) DELLA protein GAI1-like (A)	ko04075: Plant hormone signal transduction	chitin-inducible gibberellin-responsive protein 1-like [Chenopodium quinoa]	RecName: Full=Chitin-inducible gibberellin-responsive protein 1;	SubName: Full=Uncharacterized protein {ECO:0000313|EMBL:KNA20000.1};	--	GO:0005634,nucleus; GO:0003700,DNA-binding transcription factor activity; GO:0043565,sequence-specific DNA binding; GO:0006355,regulation of transcription, DNA-templated; GO:0006351,transcription, DNA-templated	PF03514.14:GRAS domain family
gene-LOC110693157	0.02	0	0	0	3.39	2.48	1	0	0	0	159	110	7.99362	0.000325236	0.0243238	up	NW_018744143.1	522964	529907	+	LOC110693157	--	K08202 MFS transporter, OCT family, solute carrier family 22 (organic cation transporter), member 4/5 | (RefSeq) organic cation/carnitine transporter 4-like (A)	--	organic cation/carnitine transporter 4-like [Chenopodium quinoa]	RecName: Full=Organic cation/carnitine transporter 4; Short=AtOCT4;	SubName: Full=Uncharacterized protein {ECO:0000313|EMBL:KNA10575.1};	Synaptic vesicle transporter SVOP and related transporters (major facilitator superfamily)	GO:0009535,chloroplast thylakoid membrane; GO:0016021,integral component of membrane; GO:0009705,plant-type vacuole membrane; GO:0005524,ATP binding; GO:0008514,organic anion transmembrane transporter activity; GO:0042631,cellular response to water deprivation	PF00083.24:Sugar (and other) transporter
gene-LOC110693236	47.68	91.85	101.59	16.36	22.05	26.09	1081	1963	1911	235	470	525	-1.81782	1.96215e-06	0.000609173	down	NW_018744143.1	2012347	2014975	+	LOC110693236	--	--	--	uncharacterized protein LOC110693236 [Chenopodium quinoa]	--	SubName: Full=Uncharacterized protein {ECO:0000313|EMBL:EMJ13323.1};	--	GO:0016021,integral component of membrane	PF06749.12:Protein of unknown function (DUF1218)
gene-LOC110693442	0.12	0.03	0	0.92	0.81	1.38	8	2	0	38	50	80	4.3679	0.000251185	0.0200497	up	NW_018744151.1	189052	193980	-	LOC110693442	--	K13430 serine/threonine-protein kinase PBS1 [EC:2.7.11.1] | (RefSeq) serine/threonine-protein kinase PBS1-like (A)	ko04626: Plant-pathogen interaction	cysteine-rich receptor-like protein kinase 15 [Chenopodium quinoa]	RecName: Full=Cysteine-rich receptor-like protein kinase 25; Short=Cysteine-rich RLK25; EC=2.7.11.-; Flags: Precursor;	SubName: Full=Uncharacterized protein {ECO:0000313|EMBL:CAN74851.1};	--	GO:0016021,integral component of membrane; GO:0005886,plasma membrane; GO:0005524,ATP binding; GO:0004674,protein serine/threonine kinase activity; GO:0042742,defense response to bacterium; GO:0006468,protein phosphorylation	PF00069.25:Protein kinase domain
gene-LOC110693449	27.77	38.61	84.27	13.33	7.42	12.54	454	595	1143	138	114	182	-2.09012	0.000308195	0.0234235	down	NW_018744151.1	257556	259714	-	LOC110693449	--	K03671 thioredoxin 1 | (RefSeq) thioredoxin-like protein CXXS1 (A)	--	thioredoxin-like protein CXXS1 [Chenopodium quinoa]	RecName: Full=Thioredoxin-like protein CXXS1; Short=AtCXXS1; AltName: Full=Mono-cysteine thioredoxin 1;	SubName: Full=Uncharacterized protein {ECO:0000313|EMBL:PKI72980.1};	Thioredoxin	GO:0005829,cytosol; GO:0016671,oxidoreductase activity, acting on a sulfur group of donors, disulfide as acceptor; GO:0003756,protein disulfide isomerase activity; GO:0015035,protein disulfide oxidoreductase activity; GO:0047134,protein-disulfide reductase activity; GO:0004791,thioredoxin-disulfide reductase activity; GO:0045454,cell redox homeostasis; GO:0034599,cellular response to oxidative st…	PF00085.20:Thioredoxin
gene-LOC110693550	0	0	0	1.83	1.12	0.51	0	0	0	31	28	12	7.43931	0.000190615	0.0165951	up	NW_018744151.1	2103111	2107178	+	LOC110693550	--	--	--	endonuclease 1 [Chenopodium quinoa]	RecName: Full=Endonuclease 1; Short=AtENDO1; EC=3.1.30.1; AltName: Full=Bifunctional nuclease I; Short=AtBFN1; AltName: Full=Deoxyribonuclease ENDO1; AltName: Full=Single-stranded-nucleate endonuclease ENDO1; Flags: Precursor;	SubName: Full=SP I mismatch endonuclease {ECO:0000313|EMBL:ABK34453.1};	--	GO:0016891,endoribonuclease activity, producing 5'-phosphomonoesters; GO:0046872,metal ion binding; GO:0003676,nucleic acid binding; GO:0000014,single-stranded DNA endodeoxyribonuclease activity; GO:0043765,T/G mismatch-specific endonuclease activity; GO:0006308,DNA catabolic process; GO:0080187,floral organ senescence; GO:0010150,leaf senescence	PF02265.16:S1/P1 Nuclease
gene-LOC110693605	19.33	31.37	25.95	9.4	5.16	8.8	844	1291	940	260	212	341	-1.58897	6.22681e-05	0.00800462	down	NW_018744151.1	3020552	3031862	+	LOC110693605	--	K01466 allantoinase [EC:3.5.2.5] | (RefSeq) allantoinase-like isoform X1 (A)	ko00230: Purine metabolism	allantoinase-like isoform X2 [Chenopodium quinoa]	RecName: Full=Allantoinase; Short=AtALN; EC=3.5.2.5;	SubName: Full=Uncharacterized protein {ECO:0000313|EMBL:KNA14579.1};	Dihydroorotase and related enzymes	GO:0005783,endoplasmic reticulum; GO:0004038,allantoinase activity; GO:0050897,cobalt ion binding; GO:0008270,zinc ion binding; GO:0000256,allantoin catabolic process; GO:0006995,cellular response to nitrogen starvation; GO:0006145,purine nucleobase catabolic process; GO:0010136,ureide catabolic process	PF01979.20:Amidohydrolase family
gene-LOC110693623	5.58	14.61	9.38	22.22	59.19	99.41	150	370	209	378	1495	2370	2.6704	1.8286e-06	0.000578628	up	NW_018744151.1	3333225	3336584	+	LOC110693623	--	--	--	uncharacterized protein LOC110693623 [Chenopodium quinoa]	--	SubName: Full=Uncharacterized protein {ECO:0000313|EMBL:KNA08111.1};	--	--	PF04720.12:PDDEXK-like family of unknown function
gene-LOC110693660	1.07	3.9	1.22	7.41	6.11	12.02	56	192	53	245	300	557	2.18057	0.000253477	0.020149	up	NW_018744151.1	4096508	4103257	+	LOC110693660	--	--	--	MACPF domain-containing protein NSL1-like isoform X1 [Chenopodium quinoa]	RecName: Full=MACPF domain-containing protein NSL1; AltName: Full=Protein NECROTIC SPOTTED LESIONS 1; Short=Protein NSL1;	SubName: Full=Uncharacterized protein {ECO:0000313|EMBL:KNA24180.1};	--	GO:0008219,cell death; GO:0052542,defense response by callose deposition; GO:0006955,immune response; GO:0009626,plant-type hypersensitive response; GO:0010337,regulation of salicylic acid metabolic process; GO:0009651,response to salt stress	PF01823.19:MAC/Perforin domain
gene-LOC110693889	2.22	2.35	2.61	4.03	7.7	9.95	138	138	135	159	451	550	1.64853	6.45751e-05	0.00823683	up	NW_018744167.1	2192536	2199350	+	LOC110693889	--	K01187 alpha-glucosidase [EC:3.2.1.20] | (RefSeq) alpha-glucosidase-like (A)	ko00052: Galactose metabolism; ko00500: Starch and sucrose metabolism	alpha-glucosidase-like [Chenopodium quinoa]	RecName: Full=Alpha-glucosidase; EC=3.2.1.20; AltName: Full=Maltase; Flags: Precursor;	SubName: Full=Uncharacterized protein {ECO:0000313|EMBL:KNA07073.1};	Maltase glucoamylase and related hydrolases, glycosyl hydrolase family 31	GO:0004558,alpha-1,4-glucosidase activity; GO:0030246,carbohydrate binding; GO:0032450,maltose alpha-glucosidase activity	PF01055.26:Glycosyl hydrolases family 31
gene-LOC110694258	2.66	3.45	2.92	0.52	1.09	1.25	194	237	177	24	75	81	-1.57972	0.000601718	0.0358658	down	NW_018744239.1	5361342	5368074	-	LOC110694258	--	--	--	uncharacterized protein LOC110694258 [Chenopodium quinoa]	--	SubName: Full=Uncharacterized protein {ECO:0000313|EMBL:KNA04232.1};	--	--	--
gene-LOC110694413	15.9	28.24	45.78	7.95	6.84	7.07	1140	1909	2724	361	461	450	-1.93789	4.59152e-05	0.00663927	down	NW_018744239.1	6943421	6965914	-	LOC110694413	--	K00876 uridine kinase [EC:2.7.1.48] | (RefSeq) uridine-cytidine kinase C-like (A)	ko00240: Pyrimidine metabolism	uncharacterized protein LOC110694413 isoform X1 [Chenopodium quinoa]	RecName: Full=Uridine kinase-like protein 1, chloroplastic; Includes: RecName: Full=Uridine kinase; Short=UK; EC=2.7.1.48; Includes: RecName: Full=Putative uracil phosphoribosyltransferase; Short=UPRTase; EC=2.4.2.9; AltName: Full=UMP pyrophosphorylase; Flags: Precursor;	SubName: Full=Uncharacterized protein {ECO:0000313|EMBL:KMS95880.1};	Armadillo/beta-Catenin/plakoglobin	GO:0009507,chloroplast; GO:0005737,cytoplasm; GO:0005829,cytosol; GO:0005524,ATP binding; GO:0005525,GTP binding; GO:0004845,uracil phosphoribosyltransferase activity; GO:0004849,uridine kinase activity; GO:0044211,CTP salvage; GO:0006206,pyrimidine nucleobase metabolic process; GO:2000904,regulation of starch metabolic process; GO:0044206,UMP salvage	PF00485.18:Phosphoribulokinase / Uridine kinase family
gene-LOC110694420	1.35	2.41	2.71	0.61	0.21	0.47	132	222	220	38	19	41	-2.20261	0.000788947	0.042478	down	NW_018744239.1	7150920	7175698	+	LOC110694420	--	--	--	uncharacterized protein LOC110694420 [Chenopodium quinoa]	--	--	--	--	--
gene-LOC110694428	10.62	11.88	14.74	3.2	4.18	4.89	257	271	296	49	95	105	-1.52494	7.79705e-05	0.00913143	down	NW_018744239.1	7416814	7420314	-	LOC110694428	--	--	--	--	--	--	--	--	--
gene-LOC110694523	3.28	4.85	7.06	7.62	35.87	30.24	51	71	91	75	524	417	2.31847	0.000463787	0.0307098	up	NW_018744239.1	1661028	1662287	+	LOC110694523	--	--	--	MLP-like protein 423 [Chenopodium quinoa]	RecName: Full=MLP-like protein 423;	SubName: Full=Uncharacterized protein {ECO:0000313|EMBL:KNA24457.1};	--	GO:0016020,membrane; GO:0006952,defense response; GO:0009607,response to biotic stimulus	PF00407.19:Pathogenesis-related protein Bet v I family
gene-LOC110694637	17.77	18.68	23.62	0.85	4.62	4.96	331	328	365	10	81	82	-2.49227	0.000128926	0.0128182	down	NW_018742345.1	6231552	6235798	+	LOC110694637	--	--	--	--	--	--	--	--	--
gene-LOC110694671	3.46	3.88	2.02	53.02	72.57	116.02	122	129	59	1184	2406	3631	4.76368	9.12176e-37	3.00188e-32	up	NW_018744240.1	462569	465650	+	LOC110694671	--	K18696 glycerophosphodiester phosphodiesterase [EC:3.1.4.46] | (RefSeq) glycerophosphodiester phosphodiesterase GDPD1, chloroplastic-like (A)	ko00564: Glycerophospholipid metabolism	glycerophosphodiester phosphodiesterase GDPD1, chloroplastic-like [Chenopodium quinoa]	RecName: Full=Glycerophosphodiester phosphodiesterase GDPD1, chloroplastic {ECO:0000305}; EC=3.1.4.46 {ECO:0000269|PubMed:21323773}; AltName: Full=Glycerophosphodiester phosphodiesterase 1 {ECO:0000303|PubMed:21323773}; Short=AtGDPD1 {ECO:0000303|PubMed:21323773}; AltName: Full=Protein SENESCENCE-RELATED GENE 3 {ECO:0000303|PubMed:8883383}; Flags: Precursor;	SubName: Full=Uncharacterized protein {ECO:0000313|EMBL:KNA07255.1}; Flags: Fragment;	Predicted starch-binding protein	GO:0009507,chloroplast; GO:0009536,plastid; GO:0008889,glycerophosphodiester phosphodiesterase activity; GO:0000287,magnesium ion binding; GO:0030643,cellular phosphate ion homeostasis; GO:0006071,glycerol metabolic process; GO:0046475,glycerophospholipid catabolic process	PF03009.17:Glycerophosphoryl diester phosphodiesterase family
gene-LOC110694782	2.57	4.62	4.14	16.01	10.41	15.19	209	355	280	826	797	1098	2.00094	2.30126e-07	0.000109757	up	NW_018742345.1	8407464	8416165	-	LOC110694782	--	--	--	protein SAR DEFICIENT 1-like isoform X1 [Chenopodium quinoa]	RecName: Full=Protein SAR DEFICIENT 1 {ECO:0000303|PubMed:20921422};	SubName: Full=Uncharacterized protein {ECO:0000313|EMBL:KNA20947.1};	--	GO:0005634,nucleus; GO:0003700,DNA-binding transcription factor activity; GO:0043565,sequence-specific DNA binding; GO:0071219,cellular response to molecule of bacterial origin; GO:0042742,defense response to bacterium; GO:0002229,defense response to oomycetes; GO:0009626,plant-type hypersensitive response; GO:1900426,positive regulation of defense response to bacterium; GO:0080142,regulation of …	PF07887.11:Calmodulin binding protein-like
gene-LOC110695063	0.3	0.55	0.26	2.7	1.07	2.29	11	19	8	63	37	75	2.59807	0.000993135	0.0488928	up	NW_018744290.1	313443	316193	+	LOC110695063	--	K01580 glutamate decarboxylase [EC:4.1.1.15] | (RefSeq) glutamate decarboxylase 4-like (A)	ko00250: Alanine, aspartate and glutamate metabolism; ko00410: beta-Alanine metabolism; ko00430: Taurine and hypotaurine metabolism; ko00650: Butanoate metabolism	glutamate decarboxylase 4-like [Chenopodium quinoa]	RecName: Full=Glutamate decarboxylase 4; Short=GAD 4; EC=4.1.1.15;	RecName: Full=Glutamate decarboxylase {ECO:0000256|RuleBase:RU361171}; EC=4.1.1.15 {ECO:0000256|RuleBase:RU361171};	Glutamate decarboxylase/sphingosine phosphate lyase	GO:0005829,cytosol; GO:0005634,nucleus; GO:0005516,calmodulin binding; GO:0004351,glutamate decarboxylase activity; GO:0030170,pyridoxal phosphate binding; GO:0006536,glutamate metabolic process	PF00282.19:Pyridoxal-dependent decarboxylase conserved domain
gene-LOC110695181	5.93	12.76	10.08	39.6	20.89	65.25	144	292	203	609	477	1406	2.22242	1.26017e-05	0.00248329	up	NW_018744290.1	1552334	1554384	-	LOC110695181	--	--	--	uncharacterized protein LOC110695181 [Chenopodium quinoa]	--	SubName: Full=Uncharacterized protein {ECO:0000313|EMBL:KDP26141.1};	--	--	PF04720.12:PDDEXK-like family of unknown function
gene-LOC110695206	133.12	23.36	142.53	7.87	15.96	22.2	2750	455	2443	103	310	407	-2.70859	0.00013622	0.0131942	down	NW_018744290.1	1834437	1838068	+	LOC110695206	--	--	--	skin secretory protein xP2-like isoform X1 [Chenopodium quinoa]	--	--	--	--	--
gene-LOC110695727	22.83	28.85	27.67	8.15	11.02	13.89	1035	1233	1041	234	470	559	-1.183	8.73644e-06	0.00189516	down	NW_018742358.1	60635	69495	+	LOC110695727	--	--	--	synaptotagmin-4-like [Chenopodium quinoa]	RecName: Full=Synaptotagmin-5; AltName: Full=NTMC2T2.1; AltName: Full=Synaptotagmin E;	SubName: Full=Uncharacterized protein {ECO:0000313|EMBL:KNA18477.1};	Ca2+-dependent lipid-binding protein CLB1/vesicle protein vp115/Granuphilin A, contains C2 domain	GO:0012505,endomembrane system; GO:0005783,endoplasmic reticulum; GO:0016021,integral component of membrane; GO:0005886,plasma membrane; GO:0009506,plasmodesma; GO:0008289,lipid binding; GO:0046872,metal ion binding; GO:0006869,lipid transport	PF00168.30:C2 domain
gene-LOC110695728	11.31	11.48	11.93	3.23	4.51	5.32	304	291	266	55	114	127	-1.3316	0.000118561	0.0120653	down	NW_018744304.1	5687362	5692678	-	LOC110695728	--	--	--	uncharacterized protein LOC110695728 [Chenopodium quinoa]	--	--	--	--	--
gene-LOC110695914	13.82	30.01	50.6	3.82	6.37	10.62	217	444	659	38	94	148	-2.14124	0.000604866	0.0358658	down	NW_018744311.1	376340	377111	-	LOC110695914	--	--	--	uncharacterized protein LOC110695914 [Chenopodium quinoa]	--	SubName: Full=Uncharacterized protein {ECO:0000313|EMBL:KNA24324.1};	--	--	PF04398.12:Protein of unknown function, DUF538
gene-LOC110695991	0.76	0.54	0.81	2.4	7.66	18.33	27	18	24	54	256	578	3.73658	7.25958e-07	0.000291019	up	NW_018744311.1	1062141	1063887	+	LOC110695991	--	K13420 LRR receptor-like serine/threonine-protein kinase FLS2 [EC:2.7.11.1] | (RefSeq) LRR receptor-like serine/threonine-protein kinase FLS2 (A)	ko04016: MAPK signaling pathway - plant; ko04626: Plant-pathogen interaction	DNA damage-repair/toleration protein DRT100-like [Chenopodium quinoa]	RecName: Full=DNA damage-repair/toleration protein DRT100; Flags: Precursor;	SubName: Full=Uncharacterized protein {ECO:0000313|EMBL:KNA25822.1};	FOG: Leucine rich repeat	GO:0009507,chloroplast; GO:0000166,nucleotide binding; GO:0006281,DNA repair	PF13855.6:Leucine rich repeat
gene-LOC110696056	0.76	0.86	1.27	5.1	4.5	6.32	31	33	43	132	173	229	2.55237	1.26986e-07	6.42921e-05	up	NW_018744311.1	1924782	1930863	-	LOC110696056	--	K00858 NAD+ kinase [EC:2.7.1.23] | (RefSeq) NAD(H) kinase 1-like isoform X1 (A)	ko00760: Nicotinate and nicotinamide metabolism	NAD(H) kinase 1-like isoform X1 [Chenopodium quinoa]	RecName: Full=NAD(H) kinase 1; Short=AtNADK-1; EC=2.7.1.23; EC=2.7.1.86;	SubName: Full=Uncharacterized protein {ECO:0000313|EMBL:KNA23419.1};	Predicted sugar kinase	GO:0005524,ATP binding; GO:0003951,NAD+ kinase activity; GO:0042736,NADH kinase activity; GO:0019674,NAD metabolic process; GO:0006741,NADP biosynthetic process	PF01513.21:ATP-NAD kinase
gene-LOC110696183	1.44	1.24	2.78	4.38	10.34	8.27	37	30	59	71	249	188	2.12363	0.000628412	0.0367656	up	NW_018744311.1	2613621	2614880	+	LOC110696183	--	--	--	F-box/kelch-repeat protein At3g23880-like [Chenopodium quinoa]	RecName: Full=F-box/kelch-repeat protein At3g23880;	SubName: Full=Uncharacterized protein {ECO:0000313|EMBL:KNA09380.1};	--	GO:0005634,nucleus; GO:0004842,ubiquitin-protein transferase activity; GO:0031146,SCF-dependent proteasomal ubiquitin-dependent protein catabolic process	PF00646.33:F-box domain
gene-LOC110696472	67.05	50.8	61.25	20.98	22.24	28.45	1715	1225	1300	340	535	646	-1.24598	1.98717e-05	0.00355412	down	NW_018744367.1	459414	463493	-	LOC110696472	--	K09517 DnaJ homolog subfamily B member 11 | (RefSeq) dnaJ protein ERDJ3B-like (A)	ko04141: Protein processing in endoplasmic reticulum	chaperone protein dnaJ 11, chloroplastic-like [Chenopodium quinoa]	RecName: Full=Chaperone protein dnaJ 11, chloroplastic; Short=AtDjC11; Short=AtJ11; Flags: Precursor;	SubName: Full=Uncharacterized protein {ECO:0000313|EMBL:KNA08894.1};	Molecular chaperone (DnaJ superfamily)	GO:0009507,chloroplast; GO:0009570,chloroplast stroma; GO:0005634,nucleus; GO:0009536,plastid	PF00226.31:DnaJ domain
gene-LOC110696502	1.14	1.48	0.59	1.01	7.02	8.04	176	216	76	99	1020	1102	2.36981	0.000899032	0.0459414	up	NW_018744367.1	1343272	1363216	-	LOC110696502	--	K11262 acetyl-CoA carboxylase / biotin carboxylase 1 [EC:6.4.1.2 6.3.4.14 2.1.3.15] | (RefSeq) acetyl-CoA carboxylase 1-like (A)	ko00061: Fatty acid biosynthesis; ko00254: Aflatoxin biosynthesis; ko00620: Pyruvate metabolism; ko00640: Propanoate metabolism; ko01212: Fatty acid metabolism	acetyl-CoA carboxylase 1-like [Chenopodium quinoa]	RecName: Full=Acetyl-CoA carboxylase 1; Short=AtACC1; EC=6.4.1.2 {ECO:0000269|PubMed:9008389}; AltName: Full=Protein EMBRYO DEFECTIVE 22; AltName: Full=Protein GURKE; AltName: Full=Protein PASTICCINO 3; Includes: RecName: Full=Biotin carboxylase; EC=6.3.4.14;	SubName: Full=Uncharacterized protein {ECO:0000313|EMBL:KNA10199.1}; Flags: Fragment;	Acetyl-CoA carboxylase	GO:0005829,cytosol; GO:0005886,plasma membrane; GO:0003989,acetyl-CoA carboxylase activity; GO:0005524,ATP binding; GO:0004075,biotin carboxylase activity; GO:0046872,metal ion binding; GO:0009793,embryo development ending in seed dormancy; GO:0030497,fatty acid elongation; GO:2001295,malonyl-CoA biosynthetic process; GO:0009933,meristem structural organization; GO:0010072,primary shoot apical me…	PF08326.12:Acetyl-CoA carboxylase, central region
gene-LOC110696551	10.24	6.23	6.43	0.53	1.8	2.57	363	208	189	12	60	81	-2.19495	0.000614335	0.0362315	down	NW_018744367.1	3394050	3408013	+	LOC110696551	--	--	--	protein ABHD11-like [Chenopodium quinoa]	--	SubName: Full=Uncharacterized protein {ECO:0000313|EMBL:KNA07584.1};	Predicted alpha/beta hydrolase	--	PF12697.7:Alpha/beta hydrolase family
gene-LOC110696596	4.8	5.65	3.02	6.97	11.25	12.09	247	274	129	227	544	552	1.26115	0.000673364	0.0381407	up	NW_018744367.1	5247207	5252103	+	LOC110696596	--	--	--	uncharacterized protein LOC110696596 isoform X1 [Chenopodium quinoa]	--	SubName: Full=Uncharacterized protein {ECO:0000313|EMBL:KNA16225.1};	--	--	PF04784.14:Protein of unknown function, DUF547
gene-LOC110696833	2.15	3.79	2.05	8.33	7.51	10.98	24	40	19	59	79	109	1.86122	0.000949018	0.047747	up	NW_018744369.1	1083088	1085047	-	LOC110696833	--	--	--	--	--	--	--	--	--
gene-LOC110696916	4.72	4.32	3.5	1.52	1.1	0.98	255	220	157	52	56	47	-1.67756	0.00052769	0.0333316	down	NW_018744420.1	61269	70714	-	LOC110696916	--	--	--	--	--	--	--	--	--
gene-LOC110696937	5.59	8.7	7.04	14.05	26.26	30.83	159	233	166	253	702	778	1.81449	1.14869e-06	0.000402153	up	NW_018744420.1	731389	738875	-	LOC110696937	--	K11153 retinol dehydrogenase 12 [EC:1.1.1.300] | (RefSeq) short-chain dehydrogenase TIC 32, chloroplastic-like (A)	--	short-chain dehydrogenase TIC 32, chloroplastic-like [Chenopodium quinoa]	RecName: Full=Short-chain dehydrogenase TIC 32, chloroplastic; EC=1.1.1.-; AltName: Full=Translocon at the inner envelope membrane of chloroplasts 32; Short=PsTIC32;	SubName: Full=Uncharacterized protein {ECO:0000313|EMBL:KNA09660.1};	Dehydrogenases with different specificities (related to short-chain alcohol dehydrogenases)	GO:0009706,chloroplast inner membrane; GO:0005516,calmodulin binding; GO:0016491,oxidoreductase activity; GO:0015031,protein transport	PF00106.25:short chain dehydrogenase
gene-LOC110696977	8.36	5.63	4.61	10.31	24.56	18.79	361	229	165	282	997	720	1.59579	0.00044487	0.029878	up	NW_018744441.1	35819	39773	-	LOC110696977	--	K06118 UDP-sulfoquinovose synthase [EC:3.13.1.1] | (RefSeq) UDP-sulfoquinovose synthase, chloroplastic (A)	ko00520: Amino sugar and nucleotide sugar metabolism; ko00561: Glycerolipid metabolism	UDP-sulfoquinovose synthase, chloroplastic [Chenopodium quinoa]	RecName: Full=UDP-sulfoquinovose synthase, chloroplastic; EC=3.13.1.1; AltName: Full=SoSQD1; AltName: Full=Sulfite:UDP-glucose sulfotransferase; AltName: Full=Sulfolipid biosynthesis protein; Flags: Precursor;	SubName: Full=Uncharacterized protein {ECO:0000313|EMBL:KNA24375.1};	UDP-glucose 4-epimerase/UDP-sulfoquinovose synthase	GO:0009570,chloroplast stroma; GO:0050662,coenzyme binding; GO:0019899,enzyme binding; GO:0101016,FMN-binding domain binding; GO:0046507,UDPsulfoquinovose synthase activity	PF01370.21:NAD dependent epimerase/dehydratase family
gene-LOC110697030	0	0	0	0	7.65	5.26	0	0	0	0	185	120	9.13735	0.000152351	0.0142435	up	NW_018744460.1	47487	49732	-	LOC110697030	--	K19329 WW domain-containing oxidoreductase | (RefSeq) short-chain dehydrogenase TIC 32, chloroplastic-like (A)	--	short-chain dehydrogenase TIC 32, chloroplastic-like [Chenopodium quinoa]	RecName: Full=Short-chain dehydrogenase TIC 32, chloroplastic; EC=1.1.1.-; AltName: Full=Translocon at the inner envelope membrane of chloroplasts 32; Short=PsTIC32;	SubName: Full=Uncharacterized protein {ECO:0000313|EMBL:ONI25357.1};	Dehydrogenases with different specificities (related to short-chain alcohol dehydrogenases)	GO:0009706,chloroplast inner membrane; GO:0005516,calmodulin binding; GO:0016491,oxidoreductase activity; GO:0015031,protein transport	PF00106.25:short chain dehydrogenase
gene-LOC110697046	35.37	45.21	65.49	12.99	14.48	19.24	1083	1305	1664	252	417	523	-1.57172	1.67926e-05	0.00313993	down	NW_018744460.1	202321	205597	+	LOC110697046	--	K09841 xanthoxin dehydrogenase [EC:1.1.1.288] | (RefSeq) xanthoxin dehydrogenase-like (A)	ko00906: Carotenoid biosynthesis	xanthoxin dehydrogenase-like [Chenopodium quinoa]	RecName: Full=Xanthoxin dehydrogenase; EC=1.1.1.288; AltName: Full=Protein GLUCOSE INSENSITIVE 1; AltName: Full=Protein IMPAIRED SUCROSE INDUCTION 4; AltName: Full=Protein SALOBRENO 3; AltName: Full=Protein SALT RESISTANT 1; AltName: Full=Protein SUGAR INSENSITIVE 4; AltName: Full=Short-chain alcohol dehydrogenase ABA2; AltName: Full=Short-chain dehydrogenase reductase 1; Short=AtSDR1; AltName: F…	SubName: Full=Uncharacterized protein {ECO:0000313|EMBL:KNA25355.1}; Flags: Fragment;	Reductases with broad range of substrate specificities	GO:0005829,cytosol; GO:0004022,alcohol dehydrogenase (NAD) activity; GO:0010301,xanthoxin dehydrogenase activity; GO:0009688,abscisic acid biosynthetic process; GO:0006561,proline biosynthetic process; GO:0010115,regulation of abscisic acid biosynthetic process; GO:0009750,response to fructose; GO:0009408,response to heat; GO:0009414,response to water deprivation; GO:0010182,sugar mediated signal…	PF13561.6:Enoyl-(Acyl carrier protein) reductase
gene-LOC110697488	11.39	15.7	31.56	4.2	5.21	4.62	214	278	492	50	92	77	-1.98486	0.000379449	0.0269123	down	NW_018744464.1	743552	748663	+	LOC110697488	--	--	--	--	--	--	--	--	--
gene-LOC110697489	0.71	1.74	10.49	0	0.05	0	16	37	196	0	1	0	-7.73134	1.94339e-05	0.0034948	down	NW_018744464.1	800291	802382	+	LOC110697489	--	--	--	--	--	--	--	--	--
gene-LOC110697700	13.87	16.57	19.17	5.21	7.17	8.09	286	322	328	68	139	148	-1.19729	0.000855295	0.0443608	down	NW_018744497.1	1456456	1458826	-	LOC110697700	--	--	--	--	--	--	--	--	--
gene-LOC110697763	10.55	13.46	26.01	3.64	1.75	2.51	128	154	262	28	20	27	-2.56272	0.000149881	0.0140525	down	NW_018744498.1	314181	314777	+	LOC110697763	--	--	--	GEM-like protein 1 [Chenopodium quinoa]	RecName: Full=GEM-like protein 1; AltName: Full=Forming homology-interacting protein 1; Short=FH-interacting protein 1;	SubName: Full=Uncharacterized protein {ECO:0000313|EMBL:KNA09337.1};	--	--	PF02893.20:GRAM domain
gene-LOC110698123	2.88	1.04	0	8.33	25.05	23.29	53	18	0	97	433	380	3.89448	0.000929903	0.0469359	up	NW_018744502.1	7436441	7438661	-	LOC110698123	--	--	--	CASP-like protein 1E1 [Chenopodium quinoa]	RecName: Full=CASP-like protein 1E1; Short=VvCASPL1E1;	RecName: Full=CASP-like protein {ECO:0000256|RuleBase:RU361233};	--	GO:0016021,integral component of membrane; GO:0005886,plasma membrane; GO:0051536,iron-sulfur cluster binding	PF04535.12:Domain of unknown function (DUF588)
gene-LOC110698289	13.13	29.77	13.3	18.28	114.31	145.44	600	1282	504	529	4911	5898	2.36552	0.00036738	0.0263401	up	NW_018744504.1	258308	265179	-	LOC110698289	--	K15404 aldehyde decarbonylase [EC:4.1.99.5] | (RefSeq) protein ECERIFERUM 1-like (A)	ko00073: Cutin, suberine and wax biosynthesis	protein ECERIFERUM 3-like [Chenopodium quinoa]	RecName: Full=Protein ECERIFERUM 3; AltName: Full=Protein FACELESS POLLEN 1; AltName: Full=Protein WAX2; AltName: Full=Protein YORE-YORE;	SubName: Full=Uncharacterized protein {ECO:0000313|EMBL:KNA10431.1};	--	GO:0005789,endoplasmic reticulum membrane; GO:0016021,integral component of membrane; GO:0016020,membrane; GO:0005886,plasma membrane; GO:0005506,iron ion binding; GO:0016491,oxidoreductase activity; GO:0043447,alkane biosynthetic process; GO:0042335,cuticle development; GO:0006723,cuticle hydrocarbon biosynthetic process; GO:0008610,lipid biosynthetic process; GO:0006629,lipid metabolic process;…	PF12076.8:WAX2 C-terminal domain
gene-LOC110698297	71.85	46.11	44.31	8.04	18.69	21.76	1157	700	592	82	283	311	-1.69821	0.000216822	0.0179281	down	NW_018744504.1	420651	421442	+	LOC110698297	--	--	--	glycine-rich cell wall structural protein 2-like [Chenopodium quinoa]	--	--	--	--	--
gene-LOC110698321	19.87	44.18	44.53	7.65	5.31	8.93	406	851	755	99	102	162	-2.20333	2.26795e-06	0.000684733	down	NW_018744504.1	244117	245639	-	LOC110698321	--	--	--	transcription factor IBH1-like 1 [Chenopodium quinoa]	RecName: Full=Transcription factor IBH1-like 1 {ECO:0000303|PubMed:24505057}; Short=AtIBL1 {ECO:0000303|PubMed:24505057}; AltName: Full=BHLH transcription factor eta; Short=bHLH eta {ECO:0000312|EMBL:CAE09173.1}; AltName: Full=Basic helix-loop-helix protein 159; Short=AtbHLH159 {ECO:0000303|PubMed:14600211}; Short=bHLH 159; AltName: Full=bHLH transcription factor bHLH159;	SubName: Full=Transcription factor BHLH054 {ECO:0000313|EMBL:AOY34425.1}; Flags: Fragment;	--	GO:0005634,nucleus; GO:0003677,DNA binding; GO:0003700,DNA-binding transcription factor activity; GO:0046983,protein dimerization activity; GO:0009742,brassinosteroid mediated signaling pathway; GO:0009740,gibberellic acid mediated signaling pathway; GO:0040008,regulation of growth; GO:0006351,transcription, DNA-templated	--
gene-LOC110698323	6.73	4.25	4.23	16.05	28.55	27.74	94	56	49	142	375	344	2.31348	3.8639e-07	0.000169858	up	NW_018744504.1	271751	272649	-	LOC110698323	--	--	--	--	--	--	--	--	--
gene-LOC110698531	57.75	53.82	123.43	2.38	11.66	19.03	1227	1078	2176	32	233	359	-2.84356	4.71882e-05	0.00669361	down	NW_018744537.1	1175710	1178974	-	LOC110698531	--	--	--	cold-regulated 413 plasma membrane protein 2-like [Chenopodium quinoa]	RecName: Full=Cold-regulated 413 plasma membrane protein 2; Short=AtCOR413-PM2;	SubName: Full=Uncharacterized protein {ECO:0000313|EMBL:KNA25855.1};	--	GO:0016021,integral component of membrane; GO:0005886,plasma membrane; GO:0005774,vacuolar membrane	PF05562.11:Cold acclimation protein WCOR413
gene-LOC110698548	1.19	1.57	1.13	2.66	3.96	6.73	51	63	40	72	159	255	1.84585	0.000203489	0.017304	up	NW_018744537.1	1344745	1346844	-	LOC110698548	--	K20893 probable galacturonosyltransferase-like 1 [EC:2.4.1.-] | (RefSeq) probable galacturonosyltransferase-like 1 (A)	--	probable galacturonosyltransferase-like 1 [Chenopodium quinoa]	RecName: Full=Probable galacturonosyltransferase-like 1; EC=2.4.1.-; AltName: Full=Protein GAOLAOZHUANGREN 1; AltName: Full=Protein PARVUS;	RecName: Full=Hexosyltransferase {ECO:0000256|RuleBase:RU362027}; EC=2.4.1.- {ECO:0000256|RuleBase:RU362027};	--	GO:0005783,endoplasmic reticulum; GO:0005789,endoplasmic reticulum membrane; GO:0005794,Golgi apparatus; GO:0016021,integral component of membrane; GO:0047262,polygalacturonate 4-alpha-galacturonosyltransferase activity; GO:0016757,transferase activity, transferring glycosyl groups; GO:0052386,cell wall thickening; GO:0010417,glucuronoxylan biosynthetic process; GO:0048366,leaf development; GO:00…	PF01501.20:Glycosyl transferase family 8
gene-LOC110698751	2.05	1.85	1.27	7.34	8	8.03	124	106	64	282	456	432	2.2785	1.07863e-10	1.31469e-07	up	NW_018744537.1	4237990	4243562	+	LOC110698751	--	K17471 sulfate transporter 3 | (RefSeq) probable sulfate transporter 3.4 (A)	--	probable sulfate transporter 3.4 [Chenopodium quinoa]	RecName: Full=Probable sulfate transporter 3.4;	SubName: Full=Uncharacterized protein {ECO:0000313|EMBL:KNA11708.1};	Sulfate/bicarbonate/oxalate exchanger SAT-1 and related transporters (SLC26 family)	GO:0005887,integral component of plasma membrane; GO:0009506,plasmodesma; GO:0008271,secondary active sulfate transmembrane transporter activity; GO:0015116,sulfate transmembrane transporter activity; GO:0015293,symporter activity	PF00916.20:Sulfate permease family
gene-LOC110698768	325.38	516.51	580.54	138.06	77.48	99.62	13714	20523	20303	3686	3071	3727	-2.04109	6.13086e-07	0.000255393	down	NW_018744537.1	4617775	4622476	+	LOC110698768	--	--	--	sulfite exporter TauE/SafE family protein 3-like [Chenopodium quinoa]	RecName: Full=Sulfite exporter TauE/SafE family protein 3 {ECO:0000312|EMBL:AEC07746.1};	SubName: Full=Uncharacterized protein {ECO:0000313|EMBL:KNA07860.1};	--	GO:0016021,integral component of membrane	PF01925.19:Sulfite exporter TauE/SafE
gene-LOC110698771	0.02	0	0	1.01	3.02	1.57	1	0	0	26	116	57	7.69916	5.87624e-07	0.000251144	up	NW_018744537.1	4676138	4680487	+	LOC110698771	--	K13692 UDP-glucose:(indol-3-yl)acetate beta-D-glucosyltransferase [EC:2.4.1.121] | (RefSeq) UDP-glycosyltransferase 84B1-like (A)	--	UDP-glycosyltransferase 82A1-like [Chenopodium quinoa]	RecName: Full=UDP-glycosyltransferase 82A1; EC=2.4.1.-;	RecName: Full=Glycosyltransferase {ECO:0000256|RuleBase:RU362057}; EC=2.4.1.- {ECO:0000256|RuleBase:RU362057};	UDP-glucuronosyl and UDP-glucosyl transferase	GO:0043231,intracellular membrane-bounded organelle; GO:0080043,quercetin 3-O-glucosyltransferase activity; GO:0080044,quercetin 7-O-glucosyltransferase activity; GO:0008152,metabolic process	PF00201.18:UDP-glucoronosyl and UDP-glucosyl transferase
gene-LOC110698951	0	0	0	9.91	4.63	3.46	0	0	0	98	68	48	9.04552	1.48469e-08	1.03957e-05	up	NW_018744537.1	2173754	2176959	-	LOC110698951	--	K10268 F-box and leucine-rich repeat protein 2/20 | (RefSeq) F-box protein SKP2A-like (A)	--	F-box/LRR-repeat protein 2-like [Chenopodium quinoa]	RecName: Full=EIN3-binding F-box protein 1; AltName: Full=F-box/LRR-repeat protein 6;	SubName: Full=Uncharacterized protein {ECO:0000313|EMBL:KNA05739.1};	Leucine rich repeat proteins, some proteins contain F-box	GO:0005634,nucleus; GO:0009873,ethylene-activated signaling pathway; GO:0010105,negative regulation of ethylene-activated signaling pathway; GO:0016567,protein ubiquitination; GO:0009723,response to ethylene; GO:0006511,ubiquitin-dependent protein catabolic process	PF12799.7:Leucine Rich repeats (2 copies)
gene-LOC110699044	45.18	71.24	87.56	14.37	4.85	5.01	1940	2884	3120	391	196	191	-2.89825	1.37545e-06	0.000452646	down	NW_018744560.1	749135	756187	-	LOC110699044	--	--	--	uncharacterized protein LOC110699044 [Chenopodium quinoa]	--	SubName: Full=Uncharacterized protein {ECO:0000313|EMBL:KNA19776.1};	--	--	--
gene-LOC110699084	2.72	1.8	3.69	0	0.07	0	40	25	45	0	1	0	-6.43403	0.000130568	0.0128978	down	NW_018744560.1	1148158	1148880	+	LOC110699084	--	--	--	uncharacterized protein LOC110699084 [Chenopodium quinoa]	--	SubName: Full=Uncharacterized protein {ECO:0000313|EMBL:KMS99521.1};	--	--	PF03087.14:Arabidopsis protein of unknown function
gene-LOC110699286	5.85	16.07	11.52	19.19	36.22	34.19	286	740	467	594	1664	1483	1.52369	0.000500364	0.0322872	up	NW_018744582.1	1967082	1969597	+	LOC110699286	--	--	--	zinc finger CCCH domain-containing protein 47-like [Chenopodium quinoa]	RecName: Full=Zinc finger CCCH domain-containing protein 29; Short=AtC3H29; AltName: Full=AtSZF2;	SubName: Full=Uncharacterized protein {ECO:0000313|EMBL:KNA17908.1};	CCCH-type Zn-finger protein	GO:0005634,nucleus; GO:0003677,DNA binding; GO:0003700,DNA-binding transcription factor activity; GO:0046872,metal ion binding; GO:0050832,defense response to fungus; GO:0006355,regulation of transcription, DNA-templated; GO:0010200,response to chitin; GO:0009409,response to cold	PF00023.30:Ankyrin repeat
gene-LOC110699523	1.4	1.18	0.83	3.64	6.07	3.31	73	58	36	120	297	153	2.03674	8.43078e-05	0.00956719	up	NW_018744589.1	416987	419634	-	LOC110699523	--	K18213 proteinaceous RNase P [EC:3.1.26.5] | (RefSeq) proteinaceous RNase P 1, chloroplastic/mitochondrial-like (A)	ko03013: RNA transport	proteinaceous RNase P 1, chloroplastic/mitochondrial-like [Chenopodium quinoa]	RecName: Full=Proteinaceous RNase P 1, chloroplastic/mitochondrial; EC=3.1.26.5 {ECO:0000269|PubMed:20473316, ECO:0000269|PubMed:22549728, ECO:0000269|PubMed:22991464}; AltName: Full=Pentatricopeptide repeat-containing protein At2g32230; Flags: Precursor;	SubName: Full=Uncharacterized protein {ECO:0000313|EMBL:KNA02674.1};	Uncharacterized membrane protein, predicted efflux pump	GO:0009507,chloroplast; GO:0005739,mitochondrion; GO:0046872,metal ion binding; GO:0004526,ribonuclease P activity; GO:0001682,tRNA 5'-leader removal; GO:0008033,tRNA processing	PF17177.4:Pentacotripeptide-repeat region of PRORP
gene-LOC110699626	2.81	2.56	1.69	3.89	47.51	51.02	106	91	53	93	1688	1711	3.88115	7.3398e-07	0.000291019	up	NW_018744593.1	2042035	2044988	+	LOC110699626	--	K13946 auxin influx carrier (AUX1 LAX family) | (RefSeq) auxin transporter-like protein 2 (A)	ko04075: Plant hormone signal transduction	GABA transporter 1-like [Chenopodium quinoa]	RecName: Full=GABA transporter 1; Short=AtGAT1; AltName: Full=Bidirectional amino acid transporter 1;	SubName: Full=Uncharacterized protein {ECO:0000313|EMBL:KNA21162.1};	Amino acid transporters	GO:0016021,integral component of membrane; GO:0005886,plasma membrane; GO:0015171,amino acid transmembrane transporter activity; GO:0015185,gamma-aminobutyric acid transmembrane transporter activity; GO:0003333,amino acid transmembrane transport; GO:0015812,gamma-aminobutyric acid transport	PF01490.18:Transmembrane amino acid transporter protein
gene-LOC110699712	8.26	12.03	15.16	21.07	42.91	66.97	214	294	326	346	1046	1541	1.92464	4.68611e-05	0.00667599	up	NW_018744593.1	5053214	5056007	-	LOC110699712	--	K00430 peroxidase [EC:1.11.1.7] | (RefSeq) peroxidase 4-like (A)	ko00940: Phenylpropanoid biosynthesis	peroxidase 4-like [Chenopodium quinoa]	RecName: Full=Peroxidase 4 {ECO:0000250|UniProtKB:Q42578}; EC=1.11.1.7; Flags: Precursor;	RecName: Full=Peroxidase {ECO:0000256|RuleBase:RU362060, ECO:0000256|SAAS:SAAS00709852}; EC=1.11.1.7 {ECO:0000256|RuleBase:RU362060, ECO:0000256|SAAS:SAAS00709852};	--	GO:0005576,extracellular region; GO:0020037,heme binding; GO:0046872,metal ion binding; GO:0004601,peroxidase activity; GO:0042744,hydrogen peroxide catabolic process; GO:0006979,response to oxidative stress	PF00141.23:Peroxidase
gene-LOC110699866	5.33	8.39	9.5	0.99	1.3	2.74	204	303	302	24	47	93	-2.15196	5.66768e-05	0.00757258	down	NW_018742390.1	868780	884797	-	LOC110699866	--	K13416 brassinosteroid insensitive 1-associated receptor kinase 1 [EC:2.7.10.1 2.7.11.1] | (RefSeq) BRASSINOSTEROID INSENSITIVE 1-associated receptor kinase 1-like (A)	ko04016: MAPK signaling pathway - plant; ko04075: Plant hormone signal transduction; ko04626: Plant-pathogen interaction	cold-responsive protein kinase 1-like isoform X1 [Chenopodium quinoa]	RecName: Full=Cold-responsive protein kinase 1 {ECO:0000303|PubMed:28344081}; EC=2.7.11.1 {ECO:0000255|PROSITE-ProRule:PRU00159, ECO:0000269|PubMed:28344081};	SubName: Full=Uncharacterized protein {ECO:0000313|EMBL:OAY28896.1};	Serine/threonine protein kinase	GO:0005886,plasma membrane; GO:0005524,ATP binding; GO:0004674,protein serine/threonine kinase activity; GO:0033160,positive regulation of protein import into nucleus, translocation; GO:0046777,protein autophosphorylation; GO:0009409,response to cold; GO:0050826,response to freezing; GO:0009625,response to insect; GO:0002237,response to molecule of bacterial origin	PF00069.25:Protein kinase domain
gene-LOC110699916	12.4	10.93	10.6	3.58	2.89	4.53	361	300	256	66	79	117	-1.54065	4.49544e-05	0.00657514	down	NW_018744603.1	324722	330390	-	LOC110699916	--	K23877 xyloglucan O-acetyltransferase | (RefSeq) protein ALTERED XYLOGLUCAN 4-like isoform X1 (A)	--	protein trichome birefringence-like 41 [Chenopodium quinoa]	RecName: Full=Protein trichome birefringence-like 41;	SubName: Full=Uncharacterized protein {ECO:0000313|EnsemblPlants:GSMUA_Achr3P32120_001};	--	GO:0005794,Golgi apparatus; GO:0016021,integral component of membrane; GO:0016413,O-acetyltransferase activity; GO:0071554,cell wall organization or biogenesis	PF13839.6:GDSL/SGNH-like Acyl-Esterase family found in Pmr5 and Cas1p
gene-LOC110700001	1.43	3.08	7.9	0.51	0.47	0.57	62	126	284	14	19	22	-2.93302	0.000293236	0.0225998	down	NW_018742390.1	1989237	2012296	+	LOC110700001	--	--	--	GDSL esterase/lipase At5g03610-like [Chenopodium quinoa]	RecName: Full=GDSL esterase/lipase At5g03610; EC=3.1.1.-; AltName: Full=Extracellular lipase At5g03610; Flags: Precursor;	SubName: Full=GDSL esterase/lipase At5g03610-like isoform X2 {ECO:0000313|RefSeq:XP_009758074.1};	--	GO:0005576,extracellular region; GO:0016788,hydrolase activity, acting on ester bonds; GO:0016042,lipid catabolic process	PF00657.22:GDSL-like Lipase/Acylhydrolase
gene-LOC110700047	25.11	20.72	27.82	9.43	11.4	12.72	1063	827	977	253	454	478	-1.05923	0.000477117	0.0313402	down	NW_018744616.1	2506040	2535999	+	LOC110700047	--	K09597 signal peptide peptidase-like 2B [EC:3.4.23.-] | (RefSeq) signal peptide peptidase-like 5 (A)	--	signal peptide peptidase-like 5 [Chenopodium quinoa]	RecName: Full=Signal peptide peptidase-like 2; Short=OsSPPL2; EC=3.4.23.-; Flags: Precursor;	SubName: Full=Uncharacterized protein {ECO:0000313|EMBL:KNA24466.1};	Uncharacterized conserved protein, contains PA domain	GO:0010008,endosome membrane; GO:0030660,Golgi-associated vesicle membrane; GO:0071458,integral component of cytoplasmic side of endoplasmic reticulum membrane; GO:0071556,integral component of lumenal side of endoplasmic reticulum membrane; GO:0005765,lysosomal membrane; GO:0004190,aspartic-type endopeptidase activity	PF04258.13:Signal peptide peptidase
gene-LOC110700140	5.52	5.47	6.1	2.2	1.72	2.29	242	226	222	61	71	89	-1.36774	0.000587096	0.035386	down	NW_018744620.1	647606	651356	+	LOC110700140	--	K19996 phosphatidylinositol transfer protein SFH5 | (RefSeq) patellin-3-like (A)	--	patellin-3-like [Chenopodium quinoa]	RecName: Full=Patellin-3;	SubName: Full=Uncharacterized protein {ECO:0000313|EMBL:KNA14099.1};	Phosphatidylinositol transfer protein SEC14 and related proteins	GO:0005737,cytoplasm; GO:0005886,plasma membrane; GO:0008289,lipid binding; GO:0007049,cell cycle; GO:0051301,cell division	PF00650.20:CRAL/TRIO domain
gene-LOC110700174	264.81	183.78	342.58	31.39	83.16	57.38	5594	3660	6005	420	1652	1076	-2.15388	2.69228e-06	0.000791073	down	NW_018744620.1	1971264	1972302	-	LOC110700174	--	--	--	fasciclin-like arabinogalactan protein 9 [Chenopodium quinoa]	RecName: Full=Fasciclin-like arabinogalactan protein 9; Flags: Precursor;	SubName: Full=Uncharacterized protein {ECO:0000313|EMBL:KNA15304.1};	--	GO:0031225,anchored component of membrane; GO:0046658,anchored component of plasma membrane; GO:0005886,plasma membrane	PF02469.22:Fasciclin domain
gene-LOC110700346	15.3	18.62	14.67	7.27	7.22	7.73	455	522	362	137	202	204	-1.02039	0.000277252	0.0216211	down	NW_018742390.1	5958317	5961917	+	LOC110700346	--	--	--	--	--	--	--	--	--
gene-LOC110700451	6.5	8.76	6.38	12.67	18.69	19.8	340	432	277	420	920	920	1.33572	5.66949e-07	0.000245496	up	NW_018744626.1	2466640	2471797	-	LOC110700451	--	--	--	calmodulin-binding protein 60 A-like isoform X1 [Chenopodium quinoa]	RecName: Full=Calmodulin-binding protein 60 A {ECO:0000303|PubMed:11782485};	SubName: Full=Uncharacterized protein {ECO:0000313|EMBL:KNA08468.1};	--	GO:0005634,nucleus; GO:0005516,calmodulin binding; GO:0003677,DNA binding; GO:1902478,negative regulation of defense response to bacterium, incompatible interaction; GO:0006355,regulation of transcription, DNA-templated; GO:0006950,response to stress; GO:0006351,transcription, DNA-templated	PF07887.11:Calmodulin binding protein-like
gene-LOC110700483	3.85	4.41	3.45	6.28	11.11	7.88	274	296	204	283	744	498	1.20868	0.000392967	0.0276397	up	NW_018744626.1	2887417	2895625	+	LOC110700483	--	K17710 pentatricopeptide repeat domain-containing protein 1 | (RefSeq) pentatricopeptide repeat-containing protein At2g18940, chloroplastic-like (A)	--	pentatricopeptide repeat-containing protein At1g74850, chloroplastic-like isoform X1 [Chenopodium quinoa]	RecName: Full=Pentatricopeptide repeat-containing protein At1g74850, chloroplastic; AltName: Full=Protein PLASTID TRANSCRIPTIONALLY ACTIVE 2; Flags: Precursor;	SubName: Full=Uncharacterized protein {ECO:0000313|EMBL:KNA12517.1};	FOG: PPR repeat	GO:0009507,chloroplast; GO:0009295,nucleoid; GO:0009508,plastid chromosome; GO:0004519,endonuclease activity; GO:0003723,RNA binding; GO:0045893,positive regulation of transcription, DNA-templated; GO:0009451,RNA modification; GO:0042793,plastid transcription	PF13041.6:PPR repeat family
gene-LOC110700528	3.3	5.41	2.24	7.51	12.33	21.02	133	206	75	192	468	753	1.97962	5.94786e-05	0.00779833	up	NW_018744626.1	3470068	3472834	-	LOC110700528	--	K14638 solute carrier family 15 (peptide/histidine transporter), member 3/4 | (RefSeq) protein NRT1/ PTR FAMILY 3.1-like (A)	--	protein NRT1/ PTR FAMILY 2.11-like isoform X1 [Chenopodium quinoa]	RecName: Full=Protein NRT1/ PTR FAMILY 2.11; Short=AtNPF2.11; AltName: Full=Nitrate transporter 1.10; AltName: Full=Protein GLUCOSINOLATE TRANSPORTER-2;	SubName: Full=Uncharacterized protein {ECO:0000313|EMBL:KNA22671.1};	H+/oligopeptide symporter	GO:0016021,integral component of membrane; GO:0005886,plasma membrane; GO:0009506,plasmodesma; GO:0090448,glucosinolate:proton symporter activity; GO:1901349,glucosinolate transport; GO:0090449,phloem glucosinolate loading; GO:0080167,response to karrikin	PF00854.21:POT family
gene-LOC110700711	0	0.02	0	0	2.69	1.34	0	1	0	0	142	67	7.6366	0.000831634	0.0436495	up	NW_018744626.1	6071319	6075723	+	LOC110700711	--	K07466 replication factor A1 | (RefSeq) replication protein A 70 kDa DNA-binding subunit A-like (A)	ko03030: DNA replication; ko03420: Nucleotide excision repair; ko03430: Mismatch repair; ko03440: Homologous recombination	replication protein A 70 kDa DNA-binding subunit B-like [Chenopodium quinoa]	RecName: Full=Replication protein A 70 kDa DNA-binding subunit B; Short=AtRPA70B; AltName: Full=AtRPA1-5; AltName: Full=Replication factor A protein 1B; AltName: Full=Replication protein A 1B; Short=AtRPA1B;	RecName: Full=Replication protein A subunit {ECO:0000256|RuleBase:RU364130};	Single-stranded DNA-binding replication protein A (RPA), large (70 kD) subunit and related ssDNA-binding proteins	GO:0005634,nucleus; GO:0003677,DNA binding; GO:0046872,metal ion binding; GO:0006310,DNA recombination; GO:0006281,DNA repair; GO:0006260,DNA replication; GO:0010224,response to UV-B	PF08646.10:Replication factor-A C terminal domain
gene-LOC110700924	5.6	7.66	6.91	0.52	1.97	1.16	169	218	173	10	56	31	-2.37387	9.19011e-05	0.0100478	down	NW_018744633.1	1252647	1257439	-	LOC110700924	--	--	--	--	--	--	--	--	--
gene-LOC110701014	31.64	51.63	158.11	17.46	5.47	17.91	615	946	2550	215	100	309	-2.48831	0.000787374	0.042478	down	NW_018744633.1	3144237	3145747	+	LOC110701014	--	--	--	uncharacterized protein LOC110701014 [Chenopodium quinoa]	--	SubName: Full=Uncharacterized protein {ECO:0000313|EMBL:KMS97965.1};	--	--	--
gene-LOC110701145	1.33	2.25	0.97	4.51	3.5	6.23	79	126	48	170	196	329	1.76501	0.000208474	0.0174749	up	NW_018744633.1	4236811	4240274	-	LOC110701145	--	K13430 serine/threonine-protein kinase PBS1 [EC:2.7.11.1] | (RefSeq) probable serine/threonine-protein kinase PBL7 (A)	ko04626: Plant-pathogen interaction	wall-associated receptor kinase-like 8 [Chenopodium quinoa]	RecName: Full=Wall-associated receptor kinase-like 8; EC=2.7.11.-; Flags: Precursor;	SubName: Full=Uncharacterized protein {ECO:0000313|EMBL:KNA26004.1};	--	GO:0016021,integral component of membrane; GO:0005886,plasma membrane; GO:0005524,ATP binding; GO:0005509,calcium ion binding; GO:0030247,polysaccharide binding; GO:0004674,protein serine/threonine kinase activity; GO:0007166,cell surface receptor signaling pathway	PF00069.25:Protein kinase domain
gene-LOC110701207	30.56	32.11	29.77	12.51	13.17	13.88	945	936	764	245	383	381	-1.12539	2.19815e-06	0.000669805	down	NW_018744633.1	4867714	4872211	+	LOC110701207	--	K12608 CCR4-NOT complex subunit CAF16 | (RefSeq) ABC transporter I family member 20-like (A)	ko03018: RNA degradation	ABC transporter I family member 20-like [Chenopodium quinoa]	RecName: Full=ABC transporter I family member 20; Short=ABC transporter ABCI.20; Short=AtABCI20; AltName: Full=GCN-related protein 3; AltName: Full=Non-intrinsic ABC protein 9;	SubName: Full=Uncharacterized protein {ECO:0000313|EMBL:KNA19195.1};	Predicted ABC-type transport, ATPase component/CCR4 associated factor	GO:0005737,cytoplasm; GO:0005524,ATP binding; GO:0016887,ATPase activity	PF00005.27:ABC transporter
gene-LOC110701259	14.81	34.83	19.47	8.78	3.87	7.39	1006	2231	1098	378	247	446	-1.62951	0.000829422	0.0436029	down	NW_018744633.1	5429082	5436525	-	LOC110701259	--	--	--	probable serine/threonine-protein kinase kinX isoform X1 [Chenopodium quinoa]	--	SubName: Full=Uncharacterized protein {ECO:0000313|EMBL:KNA24753.1};	--	--	PF12152.8:Eukaryotic translation initiation factor 4G1
gene-LOC110701318	1.26	1.34	3.47	5.47	27.87	26.13	62	62	141	170	1285	1137	3.30065	2.76847e-06	0.000798519	up	NW_018744633.1	6235962	6243768	+	LOC110701318	--	K02433 aspartyl-tRNA(Asn)/glutamyl-tRNA(Gln) amidotransferase subunit A [EC:6.3.5.6 6.3.5.7] | (RefSeq) glutamyl-tRNA(Gln) amidotransferase subunit A, chloroplastic/mitochondrial-like (A)	ko00970: Aminoacyl-tRNA biosynthesis	fatty acid amide hydrolase-like isoform X1 [Chenopodium quinoa]	RecName: Full=Fatty acid amide hydrolase; EC=3.5.1.99; AltName: Full=N-acylethanolamine amidohydrolase;	SubName: Full=Uncharacterized protein {ECO:0000313|EMBL:KNA09458.1};	Amidases	GO:0005783,endoplasmic reticulum; GO:0005789,endoplasmic reticulum membrane; GO:0005794,Golgi apparatus; GO:0016021,integral component of membrane; GO:0005886,plasma membrane; GO:0005774,vacuolar membrane; GO:0005773,vacuole; GO:0004040,amidase activity; GO:0103073,anandamide amidohydrolase activity; GO:0047412,N-(long-chain-acyl)ethanolamine deacylase activity; GO:0102077,oleamide hydrolase acti…	PF01425.21:Amidase
gene-LOC110701737	20.56	31.62	43.31	10.77	6.59	10.05	627	909	1096	208	189	272	-1.69491	0.000183631	0.016158	down	NW_018744656.1	383835	393464	-	LOC110701737	--	K11339 mortality factor 4-like protein 1 | (RefSeq) protein MRG1-like isoform X1 (A)	--	protein MRG1-like isoform X1 [Chenopodium quinoa]	RecName: Full=Protein MRG1 {ECO:0000303|PubMed:25211338}; AltName: Full=MRG family protein 1 {ECO:0000303|PubMed:25211338}; AltName: Full=Morf Related Gene 1 {ECO:0000303|PubMed:25211338};	SubName: Full=Uncharacterized protein {ECO:0000313|EMBL:KNA19774.1};	Dosage compensation regulatory complex/histone acetyltransferase complex, subunit MSL-3/MRG15/EAF3, and related CHROMO domain-containing proteins	GO:0000123,histone acetyltransferase complex; GO:0006338,chromatin remodeling; GO:0016573,histone acetylation; GO:0006355,regulation of transcription, DNA-templated; GO:0006351,transcription, DNA-templated	PF05712.13:MRG
gene-LOC110701783	0	0.14	0	1.62	1.75	3.81	0	3	0	23	37	76	5.77891	8.936e-05	0.0099015	up	NW_018744662.1	389536	390993	+	LOC110701783	--	K19747 BAHD acyltransferase [EC:2.3.1.-] | (RefSeq) BAHD acyltransferase DCR-like (A)	--	uncharacterized acetyltransferase At3g50280-like [Chenopodium quinoa]	RecName: Full=Uncharacterized acetyltransferase At3g50280; EC=2.3.1.-;	SubName: Full=BAHD acyltransferase DCR {ECO:0000313|EMBL:EXC17274.1};	--	GO:0016747,transferase activity, transferring acyl groups other than amino-acyl groups	PF02458.15:Transferase family
gene-LOC110701946	0.23	0.74	0	1.72	6.32	5.54	10	30	0	47	256	212	3.94332	0.00075703	0.0413153	up	NW_018744662.1	1514609	1522621	+	LOC110701946	--	--	--	GDSL esterase/lipase At4g26790-like [Chenopodium quinoa]	RecName: Full=GDSL esterase/lipase At4g26790; EC=3.1.1.-; AltName: Full=Extracellular lipase At4g26790; Flags: Precursor;	SubName: Full=Uncharacterized protein {ECO:0000313|EMBL:KNA04913.1};	--	GO:0005576,extracellular region; GO:0016788,hydrolase activity, acting on ester bonds; GO:0016042,lipid catabolic process	PF00657.22:GDSL-like Lipase/Acylhydrolase
gene-LOC110702245	12.37	17.66	15.18	30.38	23.01	43.57	480	646	489	747	840	1501	1.19481	0.00029398	0.0226042	up	NW_018744681.1	141476	143384	+	LOC110702245	--	K12761 carbon catabolite-derepressing protein kinase [EC:2.7.11.1] | (RefSeq) CBL-interacting serine/threonine-protein kinase 4-like (A)	--	CBL-interacting serine/threonine-protein kinase 4-like [Chenopodium quinoa]	RecName: Full=CBL-interacting serine/threonine-protein kinase 4; EC=2.7.11.1; AltName: Full=SNF1-related kinase 3.3; AltName: Full=SOS2-like protein kinase PKS9;	RecName: Full=Non-specific serine/threonine protein kinase {ECO:0000256|SAAS:SAAS00351747}; EC=2.7.11.1 {ECO:0000256|SAAS:SAAS00351747};	Serine/threonine protein kinase	GO:0005737,cytoplasm; GO:0005634,nucleus; GO:0005524,ATP binding; GO:0004674,protein serine/threonine kinase activity; GO:0035556,intracellular signal transduction; GO:0006468,protein phosphorylation	PF00069.25:Protein kinase domain
gene-LOC110702252	4.95	5.29	5.96	8.5	14.07	11.25	261	263	261	284	698	527	1.14806	0.000558617	0.0346206	up	NW_018744687.1	38410	41004	+	LOC110702252	--	K17710 pentatricopeptide repeat domain-containing protein 1 | (RefSeq) LOW QUALITY PROTEIN: putative pentatricopeptide repeat-containing protein At2g02150 (A)	--	pentatricopeptide repeat-containing protein At1g79080, chloroplastic-like [Chenopodium quinoa]	RecName: Full=Pentatricopeptide repeat-containing protein At1g79080, chloroplastic; Flags: Precursor;	SubName: Full=Uncharacterized protein {ECO:0000313|EMBL:KNA09301.1};	FOG: PPR repeat	GO:0009507,chloroplast; GO:0043231,intracellular membrane-bounded organelle; GO:0004519,endonuclease activity; GO:0003723,RNA binding; GO:0009451,RNA modification	PF13041.6:PPR repeat family
gene-LOC110702412	1.21	0.22	1.37	2.93	22.72	16.24	52	9	49	80	922	622	3.89174	1.1517e-05	0.00233818	up	NW_018744693.1	118471	120592	+	LOC110702412	--	K15398 fatty acid omega-hydroxylase [EC:1.14.-.-] | (RefSeq) cytochrome P450 86A22-like (A)	ko00073: Cutin, suberine and wax biosynthesis	cytochrome P450 86A22-like [Chenopodium quinoa]	RecName: Full=Cytochrome P450 86A22 {ECO:0000303|PubMed:19940120}; EC=1.14.13.204 {ECO:0000269|PubMed:19940120}; AltName: Full=Long-chain acyl-CoA omega-monooxygenase {ECO:0000305};	SubName: Full=Uncharacterized protein {ECO:0000313|EMBL:KNA25514.1};	Cytochrome P450 CYP4/CYP19/CYP26 subfamilies	GO:0016021,integral component of membrane; GO:0020037,heme binding; GO:0005506,iron ion binding; GO:0016709,oxidoreductase activity, acting on paired donors, with incorporation or reduction of molecular oxygen, NAD(P)H as one donor, and incorporation of one atom of oxygen; GO:0035336,long-chain fatty-acyl-CoA metabolic process	PF00067.22:Cytochrome P450
gene-LOC110702414	76.67	54.52	34.96	18.94	5.6	8.14	2664	1786	1008	417	183	251	-2.17836	0.000365747	0.0262803	down	NW_018744693.1	144828	148682	-	LOC110702414	--	K09872 aquaporin PIP | (RefSeq) probable aquaporin PIP1-4 (A)	--	probable aquaporin PIP1-4 [Chenopodium quinoa]	RecName: Full=Probable aquaporin PIP1-4; AltName: Full=Plasma membrane intrinsic protein 1-4; Short=AtPIP1;4; AltName: Full=Transmembrane protein C; Short=TMP-C;	SubName: Full=Aquaporin {ECO:0000313|EMBL:AFC98465.1};	Aquaporin (major intrinsic protein family)	GO:0005887,integral component of plasma membrane; GO:0016020,membrane; GO:0005886,plasma membrane; GO:0015250,water channel activity; GO:0034220,ion transmembrane transport; GO:0009414,response to water deprivation; GO:0006833,water transport	PF00230.20:Major intrinsic protein
gene-LOC110702468	152.8	234.08	400.99	79.64	58.96	78.39	3026	4370	6589	999	1098	1378	-1.76543	0.000102207	0.0108152	down	NW_018744693.1	910318	913448	-	LOC110702468	--	--	--	remorin-like [Chenopodium quinoa]	RecName: Full=Remorin; AltName: Full=DNA-binding protein;	SubName: Full=Uncharacterized protein {ECO:0000313|EMBL:KNA19891.1};	--	GO:0005886,plasma membrane	PF03763.13:Remorin, C-terminal region
gene-LOC110702514	3.25	0.15	0.62	1.63	36.32	20.03	157	7	25	50	1652	860	3.82807	0.000942759	0.0475119	up	NW_018744693.1	1698270	1702379	+	LOC110702514	--	K00108 choline dehydrogenase [EC:1.1.99.1] | (RefSeq) protein HOTHEAD-like (A)	ko00260: Glycine, serine and threonine metabolism	protein HOTHEAD-like [Chenopodium quinoa]	RecName: Full=Protein HOTHEAD; AltName: Full=Protein ADHESION OF CALYX EDGES; Flags: Precursor;	SubName: Full=Uncharacterized protein {ECO:0000313|EMBL:KNA23641.1};	Glucose dehydrogenase/choline dehydrogenase/mandelonitrile lyase (GMC oxidoreductase family)	GO:0005576,extracellular region; GO:0050660,flavin adenine dinucleotide binding; GO:0046593,mandelonitrile lyase activity; GO:0016614,oxidoreductase activity, acting on CH-OH group of donors; GO:0007267,cell-cell signaling; GO:0009553,embryo sac development; GO:0010430,fatty acid omega-oxidation	PF00732.19:GMC oxidoreductase
gene-LOC110702520	3.61	15.41	6.45	13.55	39.36	41.4	152	611	225	361	1557	1546	1.99443	0.000950326	0.047747	up	NW_018744693.1	1784948	1787016	+	LOC110702520	--	K15631 molybdenum cofactor sulfurtransferase [EC:2.8.1.9] | (RefSeq) molybdenum cofactor sulfurase-like isoform X1 (A)	ko00790: Folate biosynthesis	molybdenum cofactor sulfurase-like [Chenopodium quinoa]	RecName: Full=Molybdenum cofactor sulfurase {ECO:0000255|HAMAP-Rule:MF_03050}; Short=MCS {ECO:0000255|HAMAP-Rule:MF_03050}; Short=MOS {ECO:0000255|HAMAP-Rule:MF_03050}; Short=MoCo sulfurase {ECO:0000255|HAMAP-Rule:MF_03050}; EC=2.8.1.9 {ECO:0000255|HAMAP-Rule:MF_03050}; AltName: Full=Molybdenum cofactor sulfurtransferase {ECO:0000255|HAMAP-Rule:MF_03050};	SubName: Full=Uncharacterized protein {ECO:0000313|EMBL:KNA23642.1};	Molybdenum cofactor sulfurase	GO:0008265,Mo-molybdopterin cofactor sulfurase activity; GO:0102867,molybdenum cofactor sulfurtransferase activity; GO:0030151,molybdenum ion binding; GO:0030170,pyridoxal phosphate binding; GO:0006777,Mo-molybdopterin cofactor biosynthetic process	--
gene-LOC110702588	35.9	46.6	47.2	14.61	10.69	15.51	1121	1372	1223	289	314	430	-1.56337	6.9794e-07	0.000283562	down	NW_018744693.1	2842774	2847060	-	LOC110702588	--	K14423 plant 4,4-dimethylsterol C-4alpha-methyl-monooxygenase [EC:1.14.18.10] | (RefSeq) methylsterol monooxygenase 1-1-like (A)	ko00100: Steroid biosynthesis	methylsterol monooxygenase 1-1-like [Chenopodium quinoa]	RecName: Full=Methylsterol monooxygenase 1-1; EC=1.14.18.9 {ECO:0000269|PubMed:14653780}; AltName: Full=Sterol 4-alpha-methyl-oxidase 1-1; Short=AtSMO1-1;	SubName: Full=Uncharacterized protein {ECO:0000313|EMBL:KNA15593.1};	C-4 sterol methyl oxidase	GO:0005789,endoplasmic reticulum membrane; GO:0016021,integral component of membrane; GO:0016020,membrane; GO:0000254,C-4 methylsterol oxidase activity; GO:0005506,iron ion binding; GO:0080064,4,4-dimethyl-9beta,19-cyclopropylsterol oxidation; GO:0016126,sterol biosynthetic process	PF04116.13:Fatty acid hydroxylase superfamily
gene-LOC110702768	0	0	0	0	6.18	2.69	0	0	0	0	158	65	8.69366	0.000561561	0.0347376	up	NW_018744702.1	1169227	1172606	+	LOC110702768	--	--	--	--	--	--	--	--	--
gene-LOC110702774	1.37	1.01	0.64	0	0	0	36	25	14	0	0	0	-6.76341	0.000846984	0.0442104	down	NW_018744702.1	1523319	1525884	-	LOC110702774	--	--	--	uncharacterized protein LOC110702774 [Chenopodium quinoa]	--	SubName: Full=Uncharacterized protein {ECO:0000313|EMBL:KNA05185.1}; Flags: Fragment;	--	--	PF03004.14:Plant transposase (Ptta/En/Spm family)
gene-LOC110702926	7.64	15.63	6.2	35.77	20.13	35.56	291	561	196	863	721	1202	1.78529	0.000120589	0.0121732	up	NW_018744704.1	4104936	4110956	+	LOC110702926	--	--	--	protein SAR DEFICIENT 1-like [Chenopodium quinoa]	RecName: Full=Protein SAR DEFICIENT 1 {ECO:0000303|PubMed:20921422};	SubName: Full=Uncharacterized protein {ECO:0000313|EMBL:KNA20947.1};	--	GO:0005634,nucleus; GO:0003700,DNA-binding transcription factor activity; GO:0043565,sequence-specific DNA binding; GO:0071219,cellular response to molecule of bacterial origin; GO:0042742,defense response to bacterium; GO:0002229,defense response to oomycetes; GO:0009626,plant-type hypersensitive response; GO:1900426,positive regulation of defense response to bacterium; GO:0080142,regulation of …	PF07887.11:Calmodulin binding protein-like
gene-LOC110702960	18.81	30.32	36.41	7.96	9.83	10.48	358	544	575	96	176	177	-1.50675	0.00013606	0.0131942	down	NW_018744704.1	5835670	5847745	+	LOC110702960	--	K15901 EKC/KEOPS complex subunit CGI121/TPRKB | (RefSeq) EKC/KEOPS complex subunit Tprkb-like (A)	--	EKC/KEOPS complex subunit Tprkb-like [Chenopodium quinoa]	--	SubName: Full=Uncharacterized protein {ECO:0000313|EMBL:KNA14045.1};	Cell growth regulatory protein CGR11	GO:0005634,nucleus	PF08617.10:Kinase binding protein CGI-121
gene-LOC110703156	16.26	19.99	22.5	5.11	2.57	4.78	276	320	317	55	41	72	-2.13439	1.09369e-05	0.00224952	down	NW_018744718.1	953428	954350	-	LOC110703156	--	--	--	uncharacterized protein LOC110703156 [Chenopodium quinoa]	--	SubName: Full=Uncharacterized protein {ECO:0000313|EMBL:KNA19326.1};	--	GO:0016021,integral component of membrane	PF10500.9:Nuclear RNA-splicing-associated protein
gene-LOC110703335	0.55	0.33	0.4	3.54	3.86	4.47	26	15	16	107	173	189	3.28675	1.01026e-10	1.27872e-07	up	NW_018744718.1	2201910	2206711	+	LOC110703335	--	K17471 sulfate transporter 3 | (RefSeq) probable sulfate transporter 3.4 (A)	--	probable sulfate transporter 3.4 [Chenopodium quinoa]	RecName: Full=Probable sulfate transporter 3.4;	SubName: Full=Uncharacterized protein {ECO:0000313|EMBL:KNA11708.1};	Sulfate/bicarbonate/oxalate exchanger SAT-1 and related transporters (SLC26 family)	GO:0005887,integral component of plasma membrane; GO:0009506,plasmodesma; GO:0008271,secondary active sulfate transmembrane transporter activity; GO:0015116,sulfate transmembrane transporter activity; GO:0015293,symporter activity	PF00916.20:Sulfate permease family
gene-LOC110703365	391.89	557.21	413.4	113.67	102.62	129.43	16414	22001	14367	3016	4042	4812	-1.86537	1.56293e-16	5.71494e-13	down	NW_018744718.1	2535394	2539797	+	LOC110703365	--	--	--	sulfite exporter TauE/SafE family protein 3-like [Chenopodium quinoa]	RecName: Full=Sulfite exporter TauE/SafE family protein 3 {ECO:0000312|EMBL:AEC07746.1};	SubName: Full=Uncharacterized protein {ECO:0000313|EMBL:KNA07860.1};	--	GO:0016021,integral component of membrane	PF01925.19:Sulfite exporter TauE/SafE
gene-LOC110703388	1.4	1.7	1.37	2.14	7.56	10.27	75	86	61	73	382	490	2.20159	0.000212615	0.0177427	up	NW_018742393.1	1779765	1783719	-	LOC110703388	--	K23280 rhamnogalacturonan I rhamnosyltransferase [EC:2.4.1.351] | (RefSeq) uncharacterized protein At1g04910-like (A)	--	uncharacterized protein At1g04910-like [Chenopodium quinoa]	RecName: Full=O-fucosyltransferase 34 {ECO:0000305}; Short=O-FucT-34 {ECO:0000305}; EC=2.4.1.- {ECO:0000305}; AltName: Full=O-fucosyltransferase family protein {ECO:0000312|EMBL:ARJ31449.1};	SubName: Full=Uncharacterized protein {ECO:0000313|EMBL:KNA13007.1};	--	GO:0005737,cytoplasm; GO:0016021,integral component of membrane; GO:0016757,transferase activity, transferring glycosyl groups; GO:0006004,fucose metabolic process; GO:0006486,protein glycosylation	PF10250.9:GDP-fucose protein O-fucosyltransferase
gene-LOC110703659	1.59	2.49	1.96	3.54	3.72	4.84	127	187	130	179	279	343	1.10393	0.000919754	0.0466382	up	NW_018744745.1	2015791	2050416	-	LOC110703659	--	K23390 large proline-rich protein BAG6 | (RefSeq) uncharacterized protein LOC110711390 isoform X1 (A)	--	large proline-rich protein BAG6-like isoform X1 [Chenopodium quinoa]	RecName: Full=Ubiquitin; Flags: Precursor;	SubName: Full=Uncharacterized protein {ECO:0000313|EMBL:KNA12098.1};	Ubiquitin-like protein, regulator of apoptosis	GO:0005737,cytoplasm; GO:0005634,nucleus	PF00240.23:Ubiquitin family
gene-LOC110703798	1.52	3.68	4.73	0	0.22	0.25	103	235	266	0	14	15	-4.35543	1.01661e-05	0.00213094	down	NW_018744780.1	762211	794676	+	LOC110703798	--	K15015 solute carrier family 32 (vesicular inhibitory amino acid transporter) | (RefSeq) amino acid transporter AVT1I-like (A)	--	amino acid transporter AVT1I-like [Chenopodium quinoa]	RecName: Full=Amino acid transporter AVT1I {ECO:0000305}; Short=AtAvt1I {ECO:0000303|PubMed:27925655};	SubName: Full=Uncharacterized protein {ECO:0000313|EMBL:KNA23576.1};	Amino acid transporters	GO:0016021,integral component of membrane; GO:0005774,vacuolar membrane; GO:0015171,amino acid transmembrane transporter activity; GO:0003333,amino acid transmembrane transport	PF01490.18:Transmembrane amino acid transporter protein
gene-LOC110703975	1.26	2.97	3.67	0.31	0.52	0.69	70	155	169	11	27	34	-2.30133	0.000628978	0.0367656	down	NW_018744790.1	2826149	2839293	-	LOC110703975	--	--	--	CBS domain-containing protein CBSCBSPB1-like [Chenopodium quinoa]	RecName: Full=CBS domain-containing protein CBSCBSPB1;	SubName: Full=Uncharacterized protein {ECO:0000313|EMBL:KNA05510.1};	--	GO:0016021,integral component of membrane	PF00571.28:CBS domain
gene-LOC110704160	4.95	5.85	7.73	8.1	20.81	27.72	166	185	215	172	656	825	1.64629	0.00102024	0.0497409	up	NW_018744821.1	1671876	1675842	+	LOC110704160	--	K14156 choline/ethanolamine kinase [EC:2.7.1.32 2.7.1.82] | (RefSeq) probable choline kinase 1 (A)	ko00564: Glycerophospholipid metabolism	probable choline kinase 1 [Chenopodium quinoa]	RecName: Full=Probable choline kinase 1; Short=AtCK1; EC=2.7.1.32;	SubName: Full=Uncharacterized protein {ECO:0000313|EMBL:KNA16167.1};	Choline kinase	GO:0005524,ATP binding; GO:0004103,choline kinase activity; GO:0009611,response to wounding	PF01633.20:Choline/ethanolamine kinase
gene-LOC110704213	37.08	41.17	60.86	16.02	15.68	16.5	815	853	1110	223	324	322	-1.43809	7.24837e-05	0.00876972	down	NW_018742204.1	4691014	4705126	-	LOC110704213	--	--	--	protein LSD1-like [Chenopodium quinoa]	RecName: Full=Protein LOL2; AltName: Full=Protein LSD ONE LIKE 2; Short=OsLOL2; AltName: Full=Putative zinc finger LOL2;	SubName: Full=Uncharacterized protein {ECO:0000313|EMBL:KNA21117.1};	--	GO:0005634,nucleus	PF06943.12:LSD1 zinc finger
gene-LOC110704262	0.74	1.85	4.65	3.01	37.62	61.6	14	33	73	36	669	1034	3.79329	0.000140221	0.0133755	up	NW_018744828.1	463424	465035	+	LOC110704262	--	--	--	abscisic stress-ripening protein 2-like [Chenopodium quinoa]	RecName: Full=Abscisic stress-ripening protein 1;	SubName: Full=ASR2 {ECO:0000313|EMBL:AAP37981.1, ECO:0000313|EMBL:ABS19511.1};	--	GO:0005622,intracellular; GO:0005634,nucleus; GO:0043234,NA; GO:0042803,protein homodimerization activity; GO:0008270,zinc ion binding; GO:0009414,response to water deprivation	PF02496.16:ABA/WDS induced protein
gene-LOC110704813	24.28	44.78	45.49	10.53	8.74	14.03	815	1417	1267	224	276	418	-1.68513	8.81097e-06	0.00189516	down	NW_018744858.1	2469523	2477511	-	LOC110704813	--	--	--	lipid phosphate phosphatase delta-like [Chenopodium quinoa]	RecName: Full=Lipid phosphate phosphatase delta; Short=AtLPPD; EC=3.1.3.-; AltName: Full=Phosphatidic acid phosphatase delta; AltName: Full=Sphingoid phosphate phosphatase 1; Short=AtSSP1; AltName: Full=Sphingosine-1-phosphate phosphatase; Short=AtSPPASE;	SubName: Full=Uncharacterized protein {ECO:0000313|EMBL:KNA15508.1};	Sphingoid base-phosphate phosphatase	GO:0005789,endoplasmic reticulum membrane; GO:0016021,integral component of membrane; GO:0016787,hydrolase activity; GO:0009737,response to abscisic acid; GO:0006665,sphingolipid metabolic process; GO:0090332,stomatal closure	PF01569.21:PAP2 superfamily
gene-LOC110704938	63.89	51.02	96.76	8.37	17.18	13.17	530	399	666	44	134	97	-2.38995	7.51934e-07	0.000291122	down	NW_018744874.1	137857	138264	+	LOC110704938	--	--	--	uncharacterized protein LOC110704938 [Chenopodium quinoa]	--	SubName: Full=Uncharacterized protein {ECO:0000313|EMBL:KNA05283.1};	--	--	--
gene-LOC110704997	0.04	0	0	0.96	1.16	0.59	2	0	0	29	52	25	6.04729	0.000137286	0.0132104	up	NW_018744874.1	736369	740254	+	LOC110704997	--	K23408 cell division cycle-associated protein 7 | (RefSeq) cell division cycle-associated 7-like protein (A)	--	cell division cycle-associated 7-like protein [Chenopodium quinoa]	--	SubName: Full=Uncharacterized protein {ECO:0000313|EMBL:KNA18604.1};	--	--	PF10497.9:Zinc-finger domain of monoamine-oxidase A repressor R1
gene-LOC110705013	1.42	4.04	3.21	9.08	6.31	12.05	109	292	204	441	455	820	1.77681	0.000292301	0.0225806	up	NW_018744874.1	868074	874883	-	LOC110705013	--	K19729 guanine nucleotide-binding protein G(t) subunit alpha 3 | (RefSeq) guanine nucleotide-binding protein alpha-1 subunit-like (A)	--	extra-large guanine nucleotide-binding protein 1-like [Chenopodium quinoa]	RecName: Full=Extra-large guanine nucleotide-binding protein 1; AltName: Full=Extra-large GTP-binding protein 1; Short=Extra-large G-protein 1;	SubName: Full=Uncharacterized protein {ECO:0000313|EMBL:KNA14590.1};	G-protein alpha subunit (small G protein superfamily)	GO:0005834,heterotrimeric G-protein complex; GO:0005634,nucleus; GO:0031683,G-protein beta/gamma-subunit complex binding; GO:0001664,G protein-coupled receptor binding; GO:0005525,GTP binding; GO:0003924,GTPase activity; GO:0046872,metal ion binding; GO:0004871,NA; GO:0007188,adenylate cyclase-modulating G protein-coupled receptor signaling pathway	PF00503.20:G-protein alpha subunit
gene-LOC110705021	125.47	126.24	242.15	24.28	33.79	48.73	2602	2468	4167	319	659	897	-2.16617	3.87107e-07	0.000169858	down	NW_018744874.1	952483	955573	+	LOC110705021	--	--	--	cold-regulated 413 plasma membrane protein 2-like [Chenopodium quinoa]	RecName: Full=Cold-regulated 413 plasma membrane protein 2; Short=AtCOR413-PM2;	SubName: Full=Uncharacterized protein {ECO:0000313|EMBL:KNA25855.1};	--	GO:0016021,integral component of membrane; GO:0005886,plasma membrane; GO:0005774,vacuolar membrane	PF05562.11:Cold acclimation protein WCOR413
gene-LOC110705071	90.83	103.2	138.27	38.54	19.76	29.65	1760	1885	2223	473	360	510	-1.80065	2.41103e-05	0.00419812	down	NW_018744874.1	1481511	1486066	-	LOC110705071	--	K07897 Ras-related protein Rab-7A | (RefSeq) ras-related protein Rab7-like (A)	ko04144: Endocytosis; ko04145: Phagosome	ras-related protein Rab7-like [Chenopodium quinoa]	RecName: Full=Ras-related protein RABG3f; Short=AtRABG3f; AltName: Full=Ras-related protein Rab71; Short=AtRab71; AltName: Full=Ras-related protein Rab7B; Short=AtRab7B;	SubName: Full=Uncharacterized protein {ECO:0000313|EMBL:KNA19070.1};	Ras-related GTPase	GO:0010008,endosome membrane; GO:0005794,Golgi apparatus; GO:0031902,late endosome membrane; GO:0005634,nucleus; GO:0009705,plant-type vacuole membrane; GO:0005886,plasma membrane; GO:0005525,GTP binding; GO:0003924,GTPase activity; GO:0006886,intracellular protein transport; GO:0045324,late endosome to vacuole transport; GO:0007033,vacuole organization	PF00071.22:Ras family
gene-LOC110705081	7.64	10.8	13.5	1.38	1.78	1.39	105	140	154	12	23	17	-2.71279	2.77434e-06	0.000798519	down	NW_018744874.1	1542510	1543475	-	LOC110705081	--	--	--	--	--	--	--	--	--
gene-LOC110705169	65.54	68.96	52.55	20.31	29.58	35.01	1951	1935	1298	383	828	925	-1.05809	4.016e-05	0.00606251	down	NW_018744874.1	2365540	2367314	+	LOC110705169	--	K09184 GATA-binding protein, other eukaryote | (RefSeq) transcription factor stalky-like (A)	--	GATA transcription factor 5-like [Chenopodium quinoa]	RecName: Full=GATA transcription factor 5;	RecName: Full=GATA transcription factor {ECO:0000256|PIRNR:PIRNR016992};	GATA-4/5/6 transcription factors	GO:0005634,nucleus; GO:0005667,transcription factor complex; GO:0003682,chromatin binding; GO:0003700,DNA-binding transcription factor activity; GO:0000977,RNA polymerase II regulatory region sequence-specific DNA binding; GO:0001085,RNA polymerase II transcription factor binding; GO:0001228,DNA-binding transcription activator activity, RNA polymerase II-specific; GO:0008270,zinc ion binding; GO:…	PF00320.27:GATA zinc finger
gene-LOC110705199	3.19	6.12	2.73	8.99	8.94	10.92	169	306	120	302	446	514	1.39123	0.00042136	0.0291042	up	NW_018744874.1	2735914	2739311	-	LOC110705199	--	K20557 transcription factor VIP1 | (RefSeq) transcription factor VIP1-like (A)	ko04016: MAPK signaling pathway - plant	transcription factor VIP1-like [Chenopodium quinoa]	RecName: Full=Transcription factor RF2b;	SubName: Full=Uncharacterized protein {ECO:0000313|EMBL:KNA11681.1};	--	GO:0005634,nucleus; GO:0003677,DNA binding; GO:0003700,DNA-binding transcription factor activity; GO:0006351,transcription, DNA-templated	PF00170.21:bZIP transcription factor
gene-LOC110705201	2.49	3.47	1.78	5.19	7.68	6.21	128	168	76	169	371	283	1.41754	0.000382978	0.0271041	up	NW_018744874.1	2757489	2762799	+	LOC110705201	--	K05544 tRNA-dihydrouridine synthase 3 [EC:1.3.1.89] | (RefSeq) tRNA-dihydrouridine(47) synthase [NAD(P)(+)]-like (A)	--	tRNA-dihydrouridine(47) synthase [NAD(P)(+)]	RecName: Full=tRNA-dihydrouridine(47) synthase [NAD(P)(+)]-like; EC=1.3.1.-; AltName: Full=Zinc finger CCCH domain-containing protein 50; Short=AtC3H50; AltName: Full=tRNA-dihydrouridine synthase 3-like;	RecName: Full=tRNA-dihydrouridine(47) synthase [NAD(P)(+)] {ECO:0000256|RuleBase:RU291113}; EC=1.3.1.- {ECO:0000256|RuleBase:RU291113}; AltName: Full=tRNA-dihydrouridine synthase 3 {ECO:0000256|RuleBase:RU291113};	Uncharacterized conserved protein	GO:0005773,vacuole; GO:0050660,flavin adenine dinucleotide binding; GO:0046872,metal ion binding; GO:0017150,tRNA dihydrouridine synthase activity	PF01207.17:Dihydrouridine synthase (Dus)
gene-LOC110705327	0	0	0	0.39	0.73	1.02	0	0	0	10	28	37	7.24145	0.000213827	0.0177427	up	NW_018744878.1	4704720	4708699	-	LOC110705327	--	--	--	zinc finger protein WIP5-like [Chenopodium quinoa]	RecName: Full=Zinc finger protein WIP2; AltName: Full=Protein NO TRANSMITTING TRACT; AltName: Full=WIP-domain protein 2 {ECO:0000303|PubMed:11782451}; Short=AtWIP2 {ECO:0000303|PubMed:11782451};	SubName: Full=Uncharacterized protein {ECO:0000313|EMBL:KNA12717.1};	FOG: Zn-finger	GO:0005634,nucleus; GO:0003700,DNA-binding transcription factor activity; GO:0046872,metal ion binding; GO:0003676,nucleic acid binding; GO:0001709,cell fate determination; GO:1990058,fruit replum development; GO:0009860,pollen tube growth; GO:0010468,regulation of gene expression; GO:0006355,regulation of transcription, DNA-templated; GO:0006351,transcription, DNA-templated; GO:0010500,transmitt…	PF13894.6:C2H2-type zinc finger
gene-LOC110705433	14.79	11.78	4.01	23.35	63.49	60.79	613	460	138	613	2474	2236	2.34019	3.94188e-05	0.00597804	up	NW_018744878.1	1269471	1273534	-	LOC110705433	--	K06118 UDP-sulfoquinovose synthase [EC:3.13.1.1] | (RefSeq) UDP-sulfoquinovose synthase, chloroplastic-like (A)	ko00520: Amino sugar and nucleotide sugar metabolism; ko00561: Glycerolipid metabolism	UDP-sulfoquinovose synthase, chloroplastic-like [Chenopodium quinoa]	RecName: Full=UDP-sulfoquinovose synthase, chloroplastic; EC=3.13.1.1; AltName: Full=SoSQD1; AltName: Full=Sulfite:UDP-glucose sulfotransferase; AltName: Full=Sulfolipid biosynthesis protein; Flags: Precursor;	SubName: Full=Uncharacterized protein {ECO:0000313|EMBL:KNA24375.1};	UDP-glucose 4-epimerase/UDP-sulfoquinovose synthase	GO:0009570,chloroplast stroma; GO:0050662,coenzyme binding; GO:0019899,enzyme binding; GO:0101016,FMN-binding domain binding; GO:0046507,UDPsulfoquinovose synthase activity	PF01370.21:NAD dependent epimerase/dehydratase family
gene-LOC110705510	8.45	19.81	12.32	16.46	51.87	79.55	295	652	357	364	1703	2465	1.92212	0.000579313	0.0351178	up	NW_018744878.1	2649932	2651648	-	LOC110705510	--	--	--	zinc finger CCCH domain-containing protein 23-like [Chenopodium quinoa]	RecName: Full=Zinc finger CCCH domain-containing protein 20; Short=AtC3H20;	SubName: Full=Uncharacterized protein {ECO:0000313|EMBL:KNA23069.1};	CCCH-type Zn-finger protein	GO:0005886,plasma membrane; GO:0003677,DNA binding; GO:0003700,DNA-binding transcription factor activity; GO:0046872,metal ion binding; GO:0006355,regulation of transcription, DNA-templated; GO:0006979,response to oxidative stress	PF00642.24:Zinc finger C-x8-C-x5-C-x3-H type (and similar)
gene-LOC110705642	0.88	2.73	1.35	10.31	31.88	36.46	29	85	37	216	991	1070	4.07416	5.15245e-12	8.07437e-09	up	NW_018744878.1	4497993	4500993	+	LOC110705642	--	K12472 epidermal growth factor receptor substrate 15 | (RefSeq) GATA zinc finger domain-containing protein 14-like (A)	ko04144: Endocytosis	BURP domain protein RD22-like [Chenopodium quinoa]	RecName: Full=BURP domain protein RD22 {ECO:0000303|PubMed:9790599}; AltName: Full=Dehydration-responsive protein RD22 {ECO:0000303|PubMed:8479424}; Flags: Precursor;	SubName: Full=Uncharacterized protein {ECO:0000313|EMBL:KNA12476.1};	--	GO:0005768,endosome; GO:0005794,Golgi apparatus; GO:0005802,trans-Golgi network; GO:0009651,response to salt stress	PF03181.15:BURP domain
gene-LOC110705784	63.19	77.37	54.95	22.84	11.25	22.11	2341	2702	1689	536	392	727	-1.67514	1.7555e-05	0.00320953	down	NW_018744878.1	5859260	5862661	-	LOC110705784	--	K09590 brassinosteroid-6-oxidase 1 [EC:1.14.-.-] | (RefSeq) cytochrome P450 85A-like (A)	ko00905: Brassinosteroid biosynthesis	cytochrome P450 85A-like [Chenopodium quinoa]	RecName: Full=Cytochrome P450 85A; EC=1.14.-.-; AltName: Full=C6-oxidase;	SubName: Full=Uncharacterized protein {ECO:0000313|EMBL:KNA04007.1};	Cytochrome P450 CYP4/CYP19/CYP26 subfamilies	GO:0016021,integral component of membrane; GO:0020037,heme binding; GO:0005506,iron ion binding; GO:0004497,monooxygenase activity; GO:0016705,oxidoreductase activity, acting on paired donors, with incorporation or reduction of molecular oxygen	PF00067.22:Cytochrome P450
gene-LOC110705967	32.83	33.85	37.2	9.2	13.54	19.18	1921	1867	1806	341	745	996	-1.24964	4.35582e-05	0.00642593	down	NW_018744890.1	406595	414257	-	LOC110705967	--	K01126 glycerophosphoryl diester phosphodiesterase [EC:3.1.4.46] | (RefSeq) glycerophosphodiester phosphodiesterase GDPD6-like (A)	ko00564: Glycerophospholipid metabolism	glycerophosphodiester phosphodiesterase GDPDL3-like [Chenopodium quinoa]	RecName: Full=Glycerophosphodiester phosphodiesterase GDPDL3 {ECO:0000305}; EC=3.1.4.46 {ECO:0000250|UniProtKB:Q7Y208}; AltName: Full=Glycerophosphodiester phosphodiesterase-like 3 {ECO:0000303|PubMed:21323773}; Short=ATGDPDL3 {ECO:0000303|PubMed:21323773}; AltName: Full=Glycerophosphodiesterase-like 2 {ECO:0000303|PubMed:18718934}; AltName: Full=Protein MUTANT ROOT HAIR 5 {ECO:0000303|PubMed:163…	SubName: Full=Uncharacterized protein {ECO:0000313|EMBL:KNA20671.1};	Glycerophosphoryl diester phosphodiesterase	GO:0031225,anchored component of membrane; GO:0046658,anchored component of plasma membrane; GO:0009505,plant-type cell wall; GO:0005886,plasma membrane; GO:0008889,glycerophosphodiester phosphodiesterase activity; GO:0009932,cell tip growth; GO:0006071,glycerol metabolic process; GO:0010442,guard cell morphogenesis; GO:0006629,lipid metabolic process; GO:0052541,plant-type cell wall cellulose me…	PF03009.17:Glycerophosphoryl diester phosphodiesterase family
gene-LOC110706001	46.14	80.75	72.66	29.14	13.99	24.1	1305	2153	1705	522	372	605	-1.43557	0.000925337	0.0467772	down	NW_018744895.1	530434	534917	+	LOC110706001	--	--	--	WAT1-related protein At5g40230-like [Chenopodium quinoa]	RecName: Full=WAT1-related protein At5g40230;	RecName: Full=WAT1-related protein {ECO:0000256|RuleBase:RU363077};	--	GO:0016021,integral component of membrane; GO:0005886,plasma membrane; GO:0022857,transmembrane transporter activity	PF00892.20:EamA-like transporter family
gene-LOC110706161	1.31	0.79	0.96	2.1	7.45	12.79	49	28	30	50	263	426	2.8701	4.97667e-05	0.00691043	up	NW_018744917.1	12970	15811	-	LOC110706161	--	K15503 serine/threonine-protein phosphatase 6 regulatory ankyrin repeat subunit B | (RefSeq) uncharacterized protein LOC110720991 (A)	--	ankyrin repeat-containing protein BDA1-like [Chenopodium quinoa]	RecName: Full=Ankyrin repeat-containing protein BDA1 {ECO:0000305}; AltName: Full=Protein BIAN DA 1 {ECO:0000303|PubMed:22740615};	SubName: Full=Uncharacterized protein {ECO:0000313|EMBL:KNA11865.1};	FOG: Ankyrin repeat	GO:0016021,integral component of membrane; GO:0005886,plasma membrane; GO:0045087,innate immune response; GO:0009751,response to salicylic acid	PF12796.7:Ankyrin repeats (3 copies)
gene-LOC110706256	16.09	32.34	31.03	4.5	5.6	7.13	333	631	533	59	109	131	-2.1126	3.79505e-07	0.000169858	down	NW_018744949.1	2264918	2280118	+	LOC110706256	--	K20723 reticulon-3 | (RefSeq) reticulon-like protein B12 (A)	--	reticulon-like protein B12 [Chenopodium quinoa]	RecName: Full=Reticulon-like protein B12; Short=AtRTNLB12;	RecName: Full=Reticulon-like protein {ECO:0000256|RuleBase:RU363132};	Reticulon	GO:0005789,endoplasmic reticulum membrane; GO:0016021,integral component of membrane	PF02453.17:Reticulon
gene-LOC110706317	0	0.05	0	0	6.01	14.36	0	1	0	0	113	255	8.42329	0.000118787	0.0120653	up	NW_018744955.1	250078	252280	+	LOC110706317	--	K01166 ribonuclease T2 [EC:4.6.1.19] | (RefSeq) ribonuclease 1-like (A)	--	ribonuclease 1-like [Chenopodium quinoa]	RecName: Full=Ribonuclease 1; EC=3.1.27.1; Flags: Precursor;	SubName: Full=Uncharacterized protein {ECO:0000313|EMBL:KNA22870.1};	Ribonuclease, T2 family	GO:0005618,cell wall; GO:0005576,extracellular region; GO:0005886,plasma membrane; GO:0004540,ribonuclease activity; GO:0033897,ribonuclease T2 activity; GO:0003723,RNA binding; GO:0009718,anthocyanin-containing compound biosynthetic process; GO:0016036,cellular response to phosphate starvation; GO:0009611,response to wounding	PF00445.18:Ribonuclease T2 family
gene-LOC110706336	4.36	0.45	1.19	1.4	45.45	38.85	123	12	28	25	1207	974	3.80138	0.000679853	0.0383104	up	NW_018744955.1	486512	488897	-	LOC110706336	--	K20628 expansin | (RefSeq) expansin-A10-like (A)	--	expansin-A10-like [Chenopodium quinoa]	RecName: Full=Expansin-A5; Short=AtEXPA5; AltName: Full=Alpha-expansin-5; Short=At-EXP5; Short=AtEx5; AltName: Full=Ath-ExpAlpha-1.4; Flags: Precursor;	SubName: Full=Uncharacterized protein {ECO:0000313|EMBL:KNA04903.1};	--	GO:0005618,cell wall; GO:0005576,extracellular region; GO:0016020,membrane; GO:0009664,plant-type cell wall organization; GO:0080022,primary root development; GO:0009826,unidimensional cell growth	PF01357.21:Pollen allergen
gene-LOC110706487	1.13	2.66	5.75	0	0.18	0.31	33	73	139	0	5	8	-4.24455	0.000326655	0.0243238	down	NW_018744988.1	1760701	1762133	-	LOC110706487	--	--	--	protein EXORDIUM-like [Chenopodium quinoa]	RecName: Full=Protein EXORDIUM; Flags: Precursor;	SubName: Full=Uncharacterized protein {ECO:0000313|EMBL:CAN68979.1};	--	GO:0048046,apoplast; GO:0005618,cell wall; GO:0005615,extracellular space; GO:0005794,Golgi apparatus; GO:0009505,plant-type cell wall; GO:0009741,response to brassinosteroid	PF04674.12:Phosphate-induced protein 1 conserved region
gene-LOC110706609	317.56	809.67	786.19	198.57	250.66	232.94	8258	19849	16964	3271	6130	5377	-1.37747	0.000664652	0.0379596	down	NW_018744988.1	1772078	1773356	+	LOC110706609	--	--	--	protein EXORDIUM-like [Chenopodium quinoa]	RecName: Full=Protein EXORDIUM; Flags: Precursor;	SubName: Full=Uncharacterized protein {ECO:0000313|EMBL:KNA23003.1};	--	GO:0048046,apoplast; GO:0005618,cell wall; GO:0005615,extracellular space; GO:0005794,Golgi apparatus; GO:0009505,plant-type cell wall; GO:0009741,response to brassinosteroid	PF04674.12:Phosphate-induced protein 1 conserved region
gene-LOC110706694	4.56	8.52	4.62	0.85	1.61	2.23	177	312	149	21	59	77	-1.82031	0.000460958	0.0307078	down	NW_018744988.1	3001932	3003842	-	LOC110706694	--	--	--	AT-hook motif nuclear-localized protein 28-like [Chenopodium quinoa]	RecName: Full=AT-hook motif nuclear-localized protein 17 {ECO:0000312|EMBL:FAA00288.1};	RecName: Full=AT-hook motif nuclear-localized protein {ECO:0000256|PIRNR:PIRNR016021};	--	GO:0005634,nucleus; GO:0003680,AT DNA binding; GO:0003700,DNA-binding transcription factor activity; GO:0006351,transcription, DNA-templated	PF03479.15:Plants and Prokaryotes Conserved (PCC) domain
gene-LOC110706824	27.49	39.38	55.08	11.11	13.73	16.94	711	960	1182	182	334	389	-1.47065	0.0001388	0.0133171	down	NW_018744991.1	429411	436072	+	LOC110706824	--	K20362 protein transport protein YIF1 | (RefSeq) protein YIF1B-like (A)	--	protein YIF1B-like [Chenopodium quinoa]	--	SubName: Full=Uncharacterized protein {ECO:0000313|EMBL:KNA03425.1};	Predicted membrane protein	GO:0016021,integral component of membrane	PF03878.15:YIF1
gene-LOC110706917	1.24	9.49	3.06	14.64	38.98	53.69	38	275	78	285	1127	1465	3.07331	2.78381e-05	0.00465336	up	NW_018744991.1	1965360	1969081	+	LOC110706917	--	--	--	uncharacterized protein LOC110706917 [Chenopodium quinoa]	--	SubName: Full=Uncharacterized protein {ECO:0000313|EMBL:KNA08111.1};	--	--	PF04720.12:PDDEXK-like family of unknown function
gene-LOC110706921	0.34	0.8	0.38	2.82	1.2	2.97	30	67	28	158	100	233	2.34041	0.000208685	0.0174749	up	NW_018744991.1	2061600	2067569	+	LOC110706921	--	K14409 protein SMG7 | (RefSeq) LOW QUALITY PROTEIN: protein SMG7-like (A)	ko03015: mRNA surveillance pathway	protein SMG7L-like [Chenopodium quinoa]	RecName: Full=Protein SMG7L; AltName: Full=Protetin SMG7-like;	SubName: Full=Uncharacterized protein {ECO:0000313|EMBL:KNA12353.1};	Nonsense-mediated mRNA decay protein	GO:0005737,cytoplasm; GO:0005697,telomerase holoenzyme complex; GO:0004540,ribonuclease activity; GO:0043021,ribonucleoprotein complex binding; GO:0070034,telomerase RNA binding; GO:0042162,telomeric DNA binding; GO:0006406,mRNA export from nucleus; GO:0000184,nuclear-transcribed mRNA catabolic process, nonsense-mediated decay; GO:0043487,regulation of RNA stability; GO:0007004,telomere maintenan…	PF10373.9:Est1 DNA/RNA binding domain
gene-LOC110706952	4.64	7.79	6.18	11.11	29.51	20.55	199	315	220	302	1191	783	1.8069	3.38659e-05	0.00538403	up	NW_018744991.1	2712752	2715717	-	LOC110706952	--	K14494 DELLA protein | (RefSeq) DELLA protein GAI1-like (A)	ko04075: Plant hormone signal transduction	scarecrow-like protein 21 [Chenopodium quinoa]	RecName: Full=Scarecrow-like transcription factor PAT1; AltName: Full=GRAS family protein 29; Short=AtGRAS-29; AltName: Full=Protein PHYTOCHROME A SIGNAL TRANSDUCTION 1;	SubName: Full=Uncharacterized protein {ECO:0000313|EMBL:KNA24880.1};	--	GO:0005737,cytoplasm; GO:0005634,nucleus; GO:0003700,DNA-binding transcription factor activity; GO:0043565,sequence-specific DNA binding; GO:0004871,NA; GO:0009640,photomorphogenesis; GO:0006355,regulation of transcription, DNA-templated; GO:0006351,transcription, DNA-templated	PF03514.14:GRAS domain family
gene-LOC110706995	0.45	1.68	0.46	1.75	13.9	160.2	20	70	17	49	579	6300	6.09201	1.5527e-07	7.62656e-05	up	NW_018744991.1	3038996	3044987	-	LOC110706995	--	K12472 epidermal growth factor receptor substrate 15 | (RefSeq) GATA zinc finger domain-containing protein 14-like (A)	ko04144: Endocytosis	BURP domain-containing protein 9-like [Chenopodium quinoa]	RecName: Full=BURP domain-containing protein 5; Short=OsBURP05; Flags: Precursor;	SubName: Full=Uncharacterized protein {ECO:0000313|EMBL:CAN75710.1};	--	--	PF03181.15:BURP domain
gene-LOC110707230	6.66	22.61	59.47	3.23	4.17	5.52	374	1197	2771	115	220	275	-2.73269	0.000185615	0.0162454	down	NW_018744996.1	848078	852150	-	LOC110707230	--	K17604 zinc finger SWIM domain-containing protein 3 | (RefSeq) protein FAR1-RELATED SEQUENCE 5-like (A)	--	protein FAR1-RELATED SEQUENCE 3-like [Chenopodium quinoa]	RecName: Full=Protein FAR1-RELATED SEQUENCE 5;	SubName: Full=FAR1 DNA-binding domain protein {ECO:0000313|EMBL:KEH26293.1};	--	GO:0005634,nucleus; GO:0008270,zinc ion binding; GO:0006355,regulation of transcription, DNA-templated	PF03101.15:FAR1 DNA-binding domain
gene-LOC110707452	2.3	3.15	6.26	0.55	0.81	0.92	93	120	210	14	31	33	-2.29699	0.000482917	0.0316136	down	NW_018745000.1	249946	251935	-	LOC110707452	--	K17479 glutaredoxin domain-containing cysteine-rich protein 1 | (RefSeq) uncharacterized protein At5g39865-like (A)	--	uncharacterized protein At5g39865-like [Chenopodium quinoa]	RecName: Full=Uncharacterized protein At5g39865;	SubName: Full=Uncharacterized protein {ECO:0000313|EMBL:KNA05428.1};	Glutaredoxin-related protein	GO:0005886,plasma membrane; GO:0009055,electron transfer activity; GO:0015035,protein disulfide oxidoreductase activity; GO:0045454,cell redox homeostasis	PF00462.24:Glutaredoxin
gene-LOC110707640	4.08	0.85	1.52	26.94	29.14	15.73	71	14	22	297	477	243	3.56584	9.35658e-07	0.00034497	up	NW_018745003.1	2808135	2809403	-	LOC110707640	--	--	--	zinc finger Ran-binding domain-containing protein 2-like [Chenopodium quinoa]	RecName: Full=Zinc finger protein VAR3, chloroplastic {ECO:0000305}; AltName: Full=Organelle Zinc finger 1 {ECO:0000303|PubMed:25768119}; AltName: Full=Protein VARIEGATED 3 {ECO:0000303|PubMed:15340011}; Flags: Precursor;	SubName: Full=Uncharacterized protein {ECO:0000313|EMBL:KNA15812.1};	RNA-binding Ran Zn-finger protein and related proteins	GO:0009507,chloroplast; GO:0009570,chloroplast stroma; GO:0046872,metal ion binding; GO:1900871,chloroplast mRNA modification; GO:0009658,chloroplast organization; GO:0006397,mRNA processing	PF00641.18:Zn-finger in Ran binding protein and others
gene-LOC110707641	19.04	9.76	10.51	111.23	38.27	36.35	511	247	234	1891	966	866	2.4047	0.000160361	0.0146592	up	NW_018745003.1	2812702	2814450	+	LOC110707641	--	--	--	zinc finger Ran-binding domain-containing protein 2-like [Chenopodium quinoa]	--	SubName: Full=Uncharacterized protein {ECO:0000313|EMBL:KNA15813.1};	RNA-binding Ran Zn-finger protein and related proteins	GO:0046872,metal ion binding	PF00641.18:Zn-finger in Ran binding protein and others
gene-LOC110707720	0.45	1.62	0.18	6.43	6.16	6.1	12	41	4	109	155	145	3.23544	8.81639e-05	0.00983521	up	NW_018745003.1	723613	724929	-	LOC110707720	--	K09286 EREBP-like factor | (RefSeq) ethylene-responsive transcription factor TINY-like (A)	--	ethylene-responsive transcription factor TINY-like [Chenopodium quinoa]	RecName: Full=Ethylene-responsive transcription factor TINY;	SubName: Full=Uncharacterized protein {ECO:0000313|EMBL:KNA13484.1}; Flags: Fragment;	--	GO:0005634,nucleus; GO:0003677,DNA binding; GO:0003700,DNA-binding transcription factor activity; GO:0006351,transcription, DNA-templated	PF00847.20:AP2 domain
gene-LOC110707852	1.06	0.51	0.08	1.43	8.27	8.66	102	46	6	87	749	740	3.50944	0.000186073	0.0162454	up	NW_018745003.1	2202115	2211630	+	LOC110707852	--	K05643 ATP-binding cassette, subfamily A (ABC1), member 3 | (RefSeq) ABC transporter A family member 1-like isoform X1 (A)	ko02010: ABC transporters	ABC transporter G family member 32-like isoform X1 [Chenopodium quinoa]	RecName: Full=ABC transporter G family member 32 {ECO:0000303|PubMed:18299247}; Short=ABC transporter ABCG.32; Short=AtABCG32 {ECO:0000303|PubMed:18299247}; AltName: Full=Pleiotropic drug resistance protein 4 {ECO:0000303|PubMed:12430018, ECO:0000303|PubMed:16506311}; AltName: Full=Protein PERMEABLE CUTICLE 1 {ECO:0000303|PubMed:21628525};	SubName: Full=Uncharacterized protein {ECO:0000313|EMBL:KNA14919.1};	Pleiotropic drug resistance proteins (PDR1-15), ABC superfamily	GO:0016021,integral component of membrane; GO:0005886,plasma membrane; GO:0005524,ATP binding; GO:0042626,ATPase activity, coupled to transmembrane movement of substances; GO:0042335,cuticle development; GO:0006855,drug transmembrane transport	PF01061.24:ABC-2 type transporter
gene-LOC110707876	27.49	25.18	19.55	32.78	167.35	144.39	417	360	246	315	2387	1944	2.29746	5.0187e-05	0.00693951	up	NW_018745003.1	2561136	2561881	+	LOC110707876	--	--	--	uncharacterized protein LOC110707876 [Chenopodium quinoa]	--	SubName: Full=Uncharacterized protein {ECO:0000313|EMBL:KNA25442.1};	--	--	--
gene-LOC110707928	3.03	3.33	4.07	5.7	8.3	10.08	141	146	157	168	363	416	1.27657	0.000463034	0.0307098	up	NW_018745003.1	3320745	3324406	+	LOC110707928	--	--	--	F-box/kelch-repeat protein At1g55270-like [Chenopodium quinoa]	RecName: Full=F-box/kelch-repeat protein At1g55270;	SubName: Full=Uncharacterized protein {ECO:0000313|EMBL:KNA20459.1};	FOG: Kelch repeat	GO:0031463,Cul3-RING ubiquitin ligase complex; GO:0016567,protein ubiquitination	PF01344.25:Kelch motif
gene-LOC110708057	24.01	28.53	27.96	46.22	107.13	92.21	474	531	458	578	1989	1616	1.67995	3.07053e-06	0.000863659	up	NW_018745003.1	4960331	4961301	+	LOC110708057	--	--	--	putative protein TPRXL [Chenopodium quinoa]	--	SubName: Full=Uncharacterized protein {ECO:0000313|EMBL:KNA22668.1};	--	--	--
gene-LOC110708210	33.19	18.52	39.13	6.74	6.62	8.45	1243	654	1216	160	233	281	-1.9969	4.3185e-06	0.00111029	down	NW_018745014.1	140117	147804	+	LOC110708210	--	K16290 xylem cysteine proteinase [EC:3.4.22.-] | (RefSeq) cysteine protease XCP2-like (A)	--	low-temperature-induced cysteine proteinase-like [Chenopodium quinoa]	RecName: Full=Cysteine proteinase RD21A {ECO:0000305}; EC=3.4.22.- {ECO:0000305}; AltName: Full=Protein RESPONSIVE TO DEHYDRATION 21 {ECO:0000303|PubMed:8325504}; Short=RD21 {ECO:0000303|PubMed:8325504}; Flags: Precursor;	SubName: Full=Cysteine proteinase {ECO:0000313|EMBL:BAD16614.1};	Cysteine proteinase Cathepsin L	GO:0048046,apoplast; GO:0009507,chloroplast; GO:0010494,cytoplasmic stress granule; GO:0005615,extracellular space; GO:0005794,Golgi apparatus; GO:0005764,lysosome; GO:0000932,P-body; GO:0009506,plasmodesma; GO:0005773,vacuole; GO:0004197,cysteine-type endopeptidase activity; GO:0008234,cysteine-type peptidase activity; GO:0008233,peptidase activity; GO:0050832,defense response to fungus; GO:0006…	PF00112.23:Papain family cysteine protease
gene-LOC110708399	14.73	19.15	25.83	7.75	7.13	8.91	624	765	908	208	284	335	-1.23743	0.000693743	0.0390263	down	NW_018745024.1	6398003	6400714	+	LOC110708399	--	--	--	BSD domain-containing protein 1-like [Chenopodium quinoa]	--	SubName: Full=Uncharacterized protein {ECO:0000313|EMBL:KNA03690.1};	Uncharacterized conserved protein, contains BSD domain	--	PF03909.17:BSD domain
gene-LOC110708628	0.23	0.17	0.22	0.55	0.74	0.9	36	24	28	53	107	122	1.88031	0.000516664	0.0328241	up	NW_018742418.1	1438192	1445839	-	LOC110708628	--	--	--	--	--	--	--	--	--
gene-LOC110708716	1.84	2.05	2.89	5.27	4.87	9.18	152	160	198	276	379	674	1.5748	0.000156452	0.0144856	up	NW_018745024.1	11630731	11642886	+	LOC110708716	--	K01115 phospholipase D1/2 [EC:3.1.4.4] | (RefSeq) phospholipase D zeta 1-like (A)	ko00564: Glycerophospholipid metabolism; ko00565: Ether lipid metabolism; ko04144: Endocytosis	phospholipase D zeta 1-like [Chenopodium quinoa]	RecName: Full=Phospholipase D zeta 1 {ECO:0000303|PubMed:11891260}; Short=PLDzeta1 {ECO:0000303|PubMed:11891260}; EC=3.1.4.4 {ECO:0000269|PubMed:11891260}; AltName: Full=Phospholipase D p1; Short=AtPLDp1; AltName: Full=Phospholipase D1 PHOX and PX-containing domain protein;	RecName: Full=Phospholipase {ECO:0000256|PIRNR:PIRNR009376}; EC=3.1.4.4 {ECO:0000256|PIRNR:PIRNR009376};	Phospholipase D1	GO:0031410,cytoplasmic vesicle; GO:0070290,N-acylphosphatidylethanolamine-specific phospholipase D activity; GO:0035091,phosphatidylinositol binding; GO:0004630,phospholipase D activity; GO:0048017,inositol lipid-mediated signaling; GO:0008610,lipid biosynthetic process; GO:0016042,lipid catabolic process; GO:0006654,phosphatidic acid biosynthetic process; GO:0048364,root development	PF00614.22:Phospholipase D Active site motif
gene-LOC110709508	6.4	4.86	7	1.32	2.18	2.33	291	208	264	38	93	94	-1.58576	0.000328603	0.0243238	down	NW_018745068.1	1719322	1722794	+	LOC110709508	--	--	--	uncharacterized protein LOC110709508 [Chenopodium quinoa]	--	SubName: Full=Uncharacterized protein {ECO:0000313|EMBL:KNA07031.1}; Flags: Fragment;	FOG: Transposon-encoded proteins with TYA, reverse transcriptase, integrase domains in various combinations	--	PF03732.17:Retrotransposon gag protein
gene-LOC110709637	15.11	16.09	18.76	3.04	4.09	4.08	267	268	275	34	68	64	-2.06959	7.73719e-08	4.10682e-05	down	NW_018745080.1	446553	448008	-	LOC110709637	--	K00799 glutathione S-transferase [EC:2.5.1.18] | (RefSeq) glutathione S-transferase U7-like (A)	ko00480: Glutathione metabolism	glutathione S-transferase U7-like [Chenopodium quinoa]	RecName: Full=Glutathione S-transferase U7; Short=AtGSTU7; EC=2.5.1.18; AltName: Full=GST class-tau member 7; AltName: Full=Glutathione S-transferase 25;	SubName: Full=Uncharacterized protein {ECO:0000313|EMBL:KZN03392.1};	Glutathione S-transferase	GO:0005737,cytoplasm; GO:0005829,cytosol; GO:0004364,glutathione transferase activity; GO:0006749,glutathione metabolic process; GO:0009751,response to salicylic acid; GO:0009407,toxin catabolic process	PF02798.20:Glutathione S-transferase, N-terminal domain
gene-LOC110709658	1	2.05	0.42	1.52	9.38	15.02	29	56	10	28	256	387	2.96662	0.000924772	0.0467772	up	NW_018745080.1	849120	850547	-	LOC110709658	--	--	--	protein EXORDIUM-like [Chenopodium quinoa]	RecName: Full=Protein EXORDIUM; Flags: Precursor;	SubName: Full=Uncharacterized protein {ECO:0000313|EMBL:KNA15759.1};	--	GO:0048046,apoplast; GO:0005618,cell wall; GO:0005615,extracellular space; GO:0005794,Golgi apparatus; GO:0009505,plant-type cell wall; GO:0009741,response to brassinosteroid	PF04674.12:Phosphate-induced protein 1 conserved region
gene-LOC110709660	1.97	5.86	3.67	10.31	12.19	21.14	53	149	82	176	309	506	2.02218	9.03097e-05	0.00993981	up	NW_018745080.1	894133	895458	-	LOC110709660	--	--	--	protein EXORDIUM-like [Chenopodium quinoa]	RecName: Full=Protein EXORDIUM; Flags: Precursor;	SubName: Full=Uncharacterized protein {ECO:0000313|EMBL:KNA15759.1};	--	GO:0048046,apoplast; GO:0005618,cell wall; GO:0005615,extracellular space; GO:0005794,Golgi apparatus; GO:0009505,plant-type cell wall; GO:0009741,response to brassinosteroid	PF04674.12:Phosphate-induced protein 1 conserved region
gene-LOC110709695	0.25	0.32	0.85	7.43	2.08	4.74	5	6	14	94	39	84	3.46121	0.000226566	0.0185014	up	NW_018745080.1	1171784	1172765	-	LOC110709695	--	--	--	uncharacterized protein LOC110709695 [Chenopodium quinoa]	--	SubName: Full=Uncharacterized protein {ECO:0000313|EMBL:KNA12195.1};	--	--	--
gene-LOC110709699	4.79	4.49	1.2	0.55	0.44	0.68	356	315	74	26	31	45	-2.53024	0.000139603	0.0133552	down	NW_018745080.1	1439293	1446144	-	LOC110709699	--	K03327 multidrug resistance protein, MATE family | (RefSeq) protein DETOXIFICATION 27-like isoform X1 (A)	--	protein DETOXIFICATION 27-like isoform X1 [Chenopodium quinoa]	RecName: Full=Protein DETOXIFICATION 28 {ECO:0000303|PubMed:11739388}; Short=AtDTX28 {ECO:0000303|PubMed:11739388}; AltName: Full=Multidrug and toxic compound extrusion protein 28 {ECO:0000305}; Short=MATE protein 28 {ECO:0000305};	RecName: Full=Protein DETOXIFICATION {ECO:0000256|RuleBase:RU004914}; AltName: Full=Multidrug and toxic compound extrusion protein {ECO:0000256|RuleBase:RU004914};	Uncharacterized membrane protein, predicted efflux pump	GO:0016021,integral component of membrane; GO:0015297,antiporter activity; GO:0015238,drug transmembrane transporter activity; GO:0006855,drug transmembrane transport	PF01554.18:MatE
gene-LOC110709713	26.86	25	24.28	4.26	7.62	10.47	1185	1040	889	119	316	410	-1.71358	1.67739e-06	0.000541188	down	NW_018745080.1	1645949	1648118	-	LOC110709713	--	K13430 serine/threonine-protein kinase PBS1 [EC:2.7.11.1] | (RefSeq) probable serine/threonine-protein kinase PBL7 (A)	ko04626: Plant-pathogen interaction	serine/threonine-protein kinase-like protein At3g51990 [Chenopodium quinoa]	RecName: Full=Serine/threonine-protein kinase-like protein At1g28390; EC=2.7.11.1; AltName: Full=CRINKLY 4-related kinase;	SubName: Full=Uncharacterized protein {ECO:0000313|EMBL:KNA20928.1};	Serine/threonine protein kinase	GO:0005886,plasma membrane; GO:0005524,ATP binding; GO:0004675,transmembrane receptor protein serine/threonine kinase activity; GO:0007166,cell surface receptor signaling pathway; GO:0006468,protein phosphorylation	PF07714.17:Protein tyrosine kinase
gene-LOC110709775	30.12	22.57	15.8	31.19	63.94	75.62	1346	951	586	883	2687	3000	1.37393	0.000820522	0.0434531	up	NW_018745080.1	2497430	2502794	-	LOC110709775	--	K13600 chlorophyllide a oxygenase [EC:1.14.13.122] | (RefSeq) chlorophyllide a oxygenase, chloroplastic-like (A)	ko00860: Porphyrin and chlorophyll metabolism	chlorophyllide a oxygenase, chloroplastic-like [Chenopodium quinoa]	RecName: Full=Chlorophyllide a oxygenase, chloroplastic; Short=Chlorophyll a oxygenase; EC=1.14.13.122; AltName: Full=Chlorophyll b synthase; Short=AtCAO; Flags: Precursor;	SubName: Full=Uncharacterized protein {ECO:0000313|EMBL:KNA24515.1};	--	GO:0009507,chloroplast; GO:0009706,chloroplast inner membrane; GO:0009535,chloroplast thylakoid membrane; GO:0042651,thylakoid membrane; GO:0051537,2 iron, 2 sulfur cluster binding; GO:0010277,chlorophyllide a oxygenase [overall] activity; GO:0005506,iron ion binding; GO:0016705,oxidoreductase activity, acting on paired donors, with incorporation or reduction of molecular oxygen; GO:0015995,chlor…	PF00355.26:Rieske [2Fe-2S] domain
gene-LOC110709967	3.83	9.12	9.72	1.53	1.38	2.52	115	258	242	29	39	67	-1.97708	0.00059867	0.0358658	down	NW_018745105.1	2470512	2479876	+	LOC110709967	--	K11816 indole-3-pyruvate monooxygenase [EC:1.14.13.168] | (RefSeq) probable indole-3-pyruvate monooxygenase YUCCA10 (A)	ko00380: Tryptophan metabolism	probable indole-3-pyruvate monooxygenase YUCCA10 [Chenopodium quinoa]	RecName: Full=Probable indole-3-pyruvate monooxygenase YUCCA10; EC=1.14.13.168; AltName: Full=Flavin-containing monooxygenase YUCCA10;	RecName: Full=Flavin-containing monooxygenase {ECO:0000256|RuleBase:RU361177}; EC=1.-.-.- {ECO:0000256|RuleBase:RU361177};	Flavin-containing monooxygenase	GO:0050660,flavin adenine dinucleotide binding; GO:0103075,indole-3-pyruvate monooxygenase activity; GO:0004499,N,N-dimethylaniline monooxygenase activity; GO:0050661,NADP binding; GO:0009851,auxin biosynthetic process	PF00743.19:Flavin-binding monooxygenase-like
gene-LOC110710096	9.47	6.67	17.55	0.73	1.2	1.49	143	95	220	7	17	20	-3.25503	2.79041e-06	0.000798519	down	NW_018745121.1	13216	16011	-	LOC110710096	--	K11599 proteasome maturation protein | (RefSeq) cyclin-B1-2-like (A)	ko03050: Proteasome	cyclin-B1-2-like [Chenopodium quinoa]	RecName: Full=Cyclin-B1-2; AltName: Full=G2/mitotic-specific cyclin-B1-2; Short=CycB1;2;	SubName: Full=Uncharacterized protein {ECO:0000313|EMBL:KNA13637.1};	Proteasome maturation factor	GO:0007049,cell cycle; GO:0051301,cell division	PF05348.11:Proteasome maturation factor UMP1
gene-LOC110710171	3.61	6.29	4.1	0	0.56	0.6	123	202	116	0	18	18	-3.53409	0.000400315	0.0279702	down	NW_018745170.1	1574518	1576193	+	LOC110710171	--	--	--	glycosyltransferase family protein 64 C3-like [Chenopodium quinoa]	RecName: Full=Glycosyltransferase family protein 64 C3 {ECO:0000303|PubMed:24905498}; Short=GT64 C3 {ECO:0000303|PubMed:24905498}; EC=2.4.1.- {ECO:0000305}; Flags: Precursor;	SubName: Full=Uncharacterized protein {ECO:0000313|EMBL:KNA12088.1};	Acetylglucosaminyltransferase EXT1/exostosin 1	GO:0016021,integral component of membrane; GO:0046872,metal ion binding; GO:0016757,transferase activity, transferring glycosyl groups; GO:0006486,protein glycosylation	PF09258.10:Glycosyl transferase family 64 domain
gene-LOC110710230	2.92	4.48	2.07	6.64	7.95	9.8	185	268	109	267	474	552	1.47609	7.0014e-05	0.00862152	up	NW_018745170.1	1953348	1956467	-	LOC110710230	--	K13457 disease resistance protein RPM1 | (RefSeq) disease resistance protein RPM1-like (A)	ko04626: Plant-pathogen interaction	disease resistance protein RGA2-like [Chenopodium quinoa]	RecName: Full=Disease resistance protein RGA2; AltName: Full=Blight resistance protein RPI; AltName: Full=RGA2-blb;	SubName: Full=NBS-LRR type resistance protein {ECO:0000313|EMBL:ABJ99599.1};	Apoptotic ATPase	GO:0043531,ADP binding; GO:0005524,ATP binding; GO:0006952,defense response	PF00931.22:NB-ARC domain
gene-LOC110710546	4.96	5.06	2.42	15.14	12.81	15.04	240	231	97	464	583	646	1.91076	2.51106e-06	0.000744474	up	NW_018745174.1	2167962	2173059	-	LOC110710546	--	K13427 nitric-oxide synthase, plant [EC:1.14.13.39] | (RefSeq) putative nitric oxide synthase (A)	ko00220: Arginine biosynthesis; ko00330: Arginine and proline metabolism; ko04626: Plant-pathogen interaction	GTP-binding protein BRASSINAZOLE INSENSITIVE PALE GREEN 2, chloroplastic-like [Chenopodium quinoa]	RecName: Full=GTP-binding protein BRASSINAZOLE INSENSITIVE PALE GREEN 2, chloroplastic {ECO:0000303|PubMed:19919572}; Short=Protein BRZ-INSENSITIVE-PALE GREEN 2 {ECO:0000303|PubMed:19919572}; Flags: Precursor;	SubName: Full=Uncharacterized protein {ECO:0000313|EMBL:KNA03281.1};	Predicted GTPases	GO:0009507,chloroplast; GO:0009570,chloroplast stroma; GO:0005739,mitochondrion; GO:0005525,GTP binding; GO:0003924,GTPase activity; GO:0019843,rRNA binding; GO:0009742,brassinosteroid mediated signaling pathway; GO:0009658,chloroplast organization; GO:1901259,chloroplast rRNA processing; GO:0032502,developmental process; GO:1904143,positive regulation of carotenoid biosynthetic process; GO:19023…	PF01926.23:50S ribosome-binding GTPase
gene-LOC110710547	24.62	35.63	55.55	82.53	159.79	190.62	390	532	730	828	2380	2680	1.95091	1.4369e-05	0.00278159	up	NW_018745174.1	2163179	2166723	+	LOC110710547	--	--	--	protein EARLY RESPONSIVE TO DEHYDRATION 15-like [Chenopodium quinoa]	RecName: Full=Protein EARLY RESPONSIVE TO DEHYDRATION 15; AltName: Full=PAM2-containing protein CID1; AltName: Full=Polyadenylate-binding protein-interacting protein 1; Short=PABP-interacting protein 1; Short=Poly(A)-binding protein-interacting protein 1; AltName: Full=Protein CTC-INTERACTING DOMAIN 1; AltName: Full=Protein LIGHT STRESS-REGULATED 1;	SubName: Full=Uncharacterized protein {ECO:0000313|EMBL:KNA08528.1};	--	GO:0005737,cytoplasm; GO:0009617,response to bacterium; GO:0009644,response to high light intensity; GO:0009414,response to water deprivation	--
gene-LOC110710662	0.06	0	0	2.96	2.62	0.09	2	0	0	67	88	3	6.76601	0.000314864	0.0237658	up	NW_018745174.1	13022	17827	-	LOC110710662	--	K09571 FK506-binding protein 4/5 [EC:5.2.1.8] | (RefSeq) 70 kDa peptidyl-prolyl isomerase-like (A)	--	70 kDa peptidyl-prolyl isomerase-like [Chenopodium quinoa]	RecName: Full=Peptidyl-prolyl cis-trans isomerase FKBP65; Short=PPIase FKBP65; EC=5.2.1.8; AltName: Full=70 kDa peptidyl-prolyl isomerase; AltName: Full=FK506-binding protein 65; Short=AtFKBP65; AltName: Full=Immunophilin FKBP65; AltName: Full=Peptidyl-prolyl isomerase ROF2; AltName: Full=Protein ROTAMASE FKBP 2; AltName: Full=Rotamase;	RecName: Full=Peptidylprolyl isomerase {ECO:0000256|PROSITE-ProRule:PRU00277}; EC=5.2.1.8 {ECO:0000256|PROSITE-ProRule:PRU00277}; Flags: Fragment;	FKBP-type peptidyl-prolyl cis-trans isomerase	GO:0005634,nucleus; GO:0005773,vacuole; GO:0005516,calmodulin binding; GO:0005528,FK506 binding; GO:0003755,peptidyl-prolyl cis-trans isomerase activity; GO:0070370,cellular heat acclimation; GO:0061077,chaperone-mediated protein folding	PF00254.28:FKBP-type peptidyl-prolyl cis-trans isomerase
gene-LOC110710686	4.28	9.83	6.25	17.1	29.45	37.37	237	513	287	600	1534	1837	2.13484	1.11305e-07	5.81416e-05	up	NW_018745177.1	285985	292445	+	LOC110710686	--	K17756 long-chain-alcohol oxidase [EC:1.1.3.20] | (RefSeq) long-chain-alcohol oxidase FAO4A-like (A)	--	long-chain-alcohol oxidase FAO4A-like [Chenopodium quinoa]	RecName: Full=Long-chain-alcohol oxidase FAO4A; EC=1.1.3.20; AltName: Full=Long-chain fatty alcohol oxidase 4A;	RecName: Full=Long-chain-alcohol oxidase {ECO:0000256|PIRNR:PIRNR028937}; EC=1.1.3.20 {ECO:0000256|PIRNR:PIRNR028937};	--	GO:0016021,integral component of membrane; GO:0005622,intracellular; GO:0050660,flavin adenine dinucleotide binding; GO:0046577,long-chain-alcohol oxidase activity; GO:0016491,oxidoreductase activity	PF00732.19:GMC oxidoreductase
gene-LOC110711452	256.64	221.44	496.89	70.57	106.4	145.87	7728	6286	12415	1346	3013	3899	-1.55986	0.000504661	0.0324329	down	NW_018745275.1	332946	336219	-	LOC110711452	--	--	--	plasma membrane-associated cation-binding protein 1-like [Chenopodium quinoa]	RecName: Full=Plasma membrane-associated cation-binding protein 1; Short=AtPCAP1; AltName: Full=Microtubule-destabilizing protein 25;	SubName: Full=Uncharacterized protein {ECO:0000313|EMBL:KNA18787.1};	--	GO:0046658,anchored component of plasma membrane; GO:0009507,chloroplast; GO:0005881,cytoplasmic microtubule; GO:0043657,host cell; GO:0005886,plasma membrane; GO:0009506,plasmodesma; GO:0005773,vacuole; GO:0005509,calcium ion binding; GO:0005516,calmodulin binding; GO:0005507,copper ion binding; GO:0008017,microtubule binding; GO:0005547,phosphatidylinositol-3,4,5-trisphosphate binding; GO:00433…	PF05558.12:DREPP plasma membrane polypeptide
gene-LOC110711684	6.61	8.53	8.02	1.46	1.97	3.12	143	174	144	20	40	60	-1.7469	0.000275214	0.0215131	down	NW_018745281.1	375856	378691	-	LOC110711684	--	--	--	--	--	--	--	--	--
gene-LOC110711687	478.17	958.65	1284.89	193.68	175	292.12	12250	23152	27313	3143	4216	6643	-1.963	5.57874e-06	0.00133037	down	NW_018745281.1	2916037	2918238	-	LOC110711687	--	K08235 xyloglucan:xyloglucosyl transferase [EC:2.4.1.207] | (RefSeq) xyloglucan endotransglucosylase/hydrolase protein 24-like (A)	--	xyloglucan endotransglucosylase/hydrolase protein 24-like [Chenopodium quinoa]	RecName: Full=Xyloglucan endotransglucosylase/hydrolase protein 24; Short=At-XTH24; Short=XTH-24; EC=2.4.1.207; AltName: Full=Endo-xyloglucan transferase; AltName: Full=Meristem protein 5; Short=MERI-5 protein; Short=MERI5 protein; AltName: Full=Xyloglucan endo-1,4-beta-D-glucanase; Flags: Precursor;	RecName: Full=Xyloglucan endotransglucosylase/hydrolase {ECO:0000256|RuleBase:RU361120}; EC=2.4.1.207 {ECO:0000256|RuleBase:RU361120};	--	GO:0048046,apoplast; GO:0005618,cell wall; GO:0005737,cytoplasm; GO:0005794,Golgi apparatus; GO:0009505,plant-type cell wall; GO:0005886,plasma membrane; GO:0004553,hydrolase activity, hydrolyzing O-glycosyl compounds; GO:0016762,xyloglucan:xyloglucosyl transferase activity; GO:0042546,cell wall biogenesis; GO:0009828,plant-type cell wall loosening; GO:0071669,plant-type cell wall organization or…	PF00722.21:Glycosyl hydrolases family 16
gene-LOC110711980	14.28	12.9	29.32	3.06	4.69	4.57	162	138	276	22	50	46	-2.13861	0.00031173	0.0236208	down	NW_018745286.1	1739181	1742442	-	LOC110711980	--	--	--	uncharacterized protein LOC110711980 [Chenopodium quinoa]	--	SubName: Full=Uncharacterized protein {ECO:0000313|EMBL:KNA10041.1};	--	--	--
gene-LOC110712064	4.85	8.2	12.92	2.01	2.38	2.13	141	225	312	37	65	55	-1.90408	0.000654766	0.0377368	down	NW_018745286.1	4144712	4156237	-	LOC110712064	--	--	--	--	--	--	--	--	--
gene-LOC110712190	19.06	25	33.33	8.59	10.18	11.05	410	507	595	117	206	211	-1.29107	0.000558584	0.0346206	down	NW_018745291.1	1223657	1227167	-	LOC110712190	--	K23565 ER membrane protein complex subunit 4 | (RefSeq) ER membrane protein complex subunit 4-like (A)	--	ER membrane protein complex subunit 4-like [Chenopodium quinoa]	--	SubName: Full=Uncharacterized protein {ECO:0000313|EMBL:KNA04332.1};	Predicted membrane protein	GO:0016021,integral component of membrane	PF06417.12:Protein of unknown function (DUF1077)
gene-LOC110712262	5.8	6.44	7.21	0.69	1.75	2.64	198	207	204	15	56	80	-1.8912	0.000802837	0.0430303	down	NW_018745291.1	97030	100104	+	LOC110712262	--	K09838 zeaxanthin epoxidase [EC:1.14.15.21] | (RefSeq) zeaxanthin epoxidase, chloroplastic-like isoform X1 (A)	ko00906: Carotenoid biosynthesis	uncharacterized protein LOC110712262 [Chenopodium quinoa]	RecName: Full=Zeaxanthin epoxidase, chloroplastic; Short=OgZEP; EC=1.14.15.21; Flags: Precursor;	SubName: Full=Uncharacterized protein {ECO:0000313|EMBL:KNA07975.1};	Kynurenine 3-monooxygenase and related flavoprotein monooxygenases	GO:0009507,chloroplast; GO:0016020,membrane; GO:0071949,FAD binding; GO:0009540,zeaxanthin epoxidase [overall] activity; GO:0009688,abscisic acid biosynthetic process	PF01494.19:FAD binding domain
gene-LOC110712272	6.55	8.97	8.56	2.53	3.73	4.46	396	511	429	97	212	239	-1.08524	0.000900817	0.0459612	down	NW_018745291.1	1003142	1009621	-	LOC110712272	--	--	--	BTB/POZ domain-containing protein NPY1-like [Chenopodium quinoa]	RecName: Full=BTB/POZ domain-containing protein NPY1; AltName: Full=Protein ENHANCER OF PINOID; AltName: Full=Protein MACCHI-BOU 4; AltName: Full=Protein NAKED PINS IN YUC MUTANTS 1;	SubName: Full=Uncharacterized protein {ECO:0000313|EMBL:KNA11053.1};	--	GO:0005770,late endosome; GO:0005886,plasma membrane; GO:0004871,NA; GO:0045176,apical protein localization; GO:0010540,basipetal auxin transport; GO:0048825,cotyledon development; GO:0009908,flower development; GO:0010229,inflorescence development; GO:0048827,phyllome development; GO:0009911,positive regulation of flower development; GO:0016567,protein ubiquitination	PF03000.14:NPH3 family
gene-LOC110712358	1.47	1.23	1.43	2.7	4.5	7.88	123	97	99	143	354	586	1.90691	4.97044e-05	0.00691043	up	NW_018745323.1	519014	524719	+	LOC110712358	--	--	--	--	--	--	--	--	--
gene-LOC110712549	4.81	8.3	2.04	4.49	44.5	38.28	196	319	69	116	1707	1386	2.60227	0.000988642	0.0488928	up	NW_018745323.1	1296675	1298680	+	LOC110712549	--	K21995 unsaturated fatty acid epoxidase [EC:1.14.-.-] | (RefSeq) cytochrome P450 77A2-like (A)	ko00073: Cutin, suberine and wax biosynthesis	cytochrome P450 77A2-like [Chenopodium quinoa]	RecName: Full=Cytochrome P450 77A1; EC=1.14.-.-; AltName: Full=CYPLXXVIIA1; AltName: Full=Cytochrome P-450EG6; Flags: Fragment;	SubName: Full=Uncharacterized protein {ECO:0000313|EMBL:KNA10060.1};	Cytochrome P450 CYP2 subfamily	GO:0020037,heme binding; GO:0005506,iron ion binding; GO:0004497,monooxygenase activity; GO:0016705,oxidoreductase activity, acting on paired donors, with incorporation or reduction of molecular oxygen	PF00067.22:Cytochrome P450
gene-LOC110712596	0	0	0	0	9.88	10.14	0	0	0	0	194	188	9.45433	5.8477e-05	0.00769768	up	NW_018742418.1	8173602	8175838	+	LOC110712596	--	K01166 ribonuclease T2 [EC:4.6.1.19] | (RefSeq) ribonuclease 1-like (A)	--	ribonuclease 1-like [Chenopodium quinoa]	RecName: Full=Ribonuclease 1; EC=3.1.27.1; Flags: Precursor;	SubName: Full=Uncharacterized protein {ECO:0000313|EMBL:KNA22870.1};	Ribonuclease, T2 family	GO:0005618,cell wall; GO:0005576,extracellular region; GO:0005886,plasma membrane; GO:0004540,ribonuclease activity; GO:0033897,ribonuclease T2 activity; GO:0003723,RNA binding; GO:0009718,anthocyanin-containing compound biosynthetic process; GO:0016036,cellular response to phosphate starvation; GO:0009611,response to wounding	PF00445.18:Ribonuclease T2 family
gene-LOC110712611	56.39	93.05	78.8	114.15	202.97	213.97	2638	4104	3059	3383	8930	8886	1.30134	2.56521e-05	0.00441981	up	NW_018745323.1	2461853	2464710	-	LOC110712611	--	K00737 beta-1,4-mannosyl-glycoprotein beta-1,4-N-acetylglucosaminyltransferase [EC:2.4.1.144] | (RefSeq) uncharacterized protein LOC110712611 isoform X1 (A)	ko00510: N-Glycan biosynthesis	uncharacterized protein LOC110712611 isoform X1 [Chenopodium quinoa]	--	SubName: Full=Uncharacterized protein {ECO:0000313|EMBL:KNA25730.1};	--	GO:0016021,integral component of membrane; GO:0003830,beta-1,4-mannosylglycoprotein 4-beta-N-acetylglucosaminyltransferase activity; GO:0006487,protein N-linked glycosylation	PF04724.13:Glycosyltransferase family 17
gene-LOC110712859	6.44	14.99	9.53	27.54	21.87	21.87	307	674	377	832	981	926	1.35419	0.000822182	0.0434531	up	NW_018745382.1	59027	61485	+	LOC110712859	--	--	--	--	--	--	--	--	--
gene-LOC110712932	5.23	5.54	8.74	1.7	1.89	2.5	165	165	229	34	56	70	-1.6108	0.000984848	0.0488928	down	NW_018745395.1	1529912	1533058	+	LOC110712932	--	K20359 PRA1 family protein 1 | (RefSeq) PRA1 family protein F2-like (A)	--	PRA1 family protein F2-like [Chenopodium quinoa]	RecName: Full=PRA1 family protein F2 {ECO:0000303|PubMed:18583532}; Short=AtPRA1.F2 {ECO:0000303|PubMed:18583532}; AltName: Full=Prenylated Rab acceptor 7 {ECO:0000303|PubMed:18845362};	RecName: Full=PRA1 family protein {ECO:0000256|RuleBase:RU363107};	Prenylated rab acceptor 1	GO:0005783,endoplasmic reticulum; GO:0010008,endosome membrane; GO:0005794,Golgi apparatus; GO:0016021,integral component of membrane; GO:0005774,vacuolar membrane; GO:0016192,vesicle-mediated transport	PF03208.19:PRA1 family protein
gene-LOC110712942	1.45	2.86	1.98	2.71	8.25	13.76	90	168	102	107	483	760	2.02338	0.000710599	0.0396811	up	NW_018745395.1	204437	207629	-	LOC110712942	--	K13459 disease resistance protein RPS2 | (RefSeq) disease resistance protein RPS2-like (A)	ko04626: Plant-pathogen interaction	disease resistance protein RPS2-like [Chenopodium quinoa]	RecName: Full=Disease resistance protein RPS2; AltName: Full=Resistance to Pseudomonas syringae protein 2;	SubName: Full=Uncharacterized protein {ECO:0000313|EMBL:KDP33865.1};	Apoptotic ATPase	GO:0005737,cytoplasm; GO:0005886,plasma membrane; GO:0043531,ADP binding; GO:0005524,ATP binding; GO:0006952,defense response; GO:0042742,defense response to bacterium; GO:0016045,detection of bacterium; GO:0009626,plant-type hypersensitive response; GO:0007165,signal transduction	PF00931.22:NB-ARC domain
gene-LOC110712975	0.03	0.17	0	1.19	1.5	2.15	2	10	0	48	90	122	4.75955	1.73741e-05	0.00320486	up	NW_018742418.1	8838403	8843220	+	LOC110712975	--	--	--	phosphate transporter PHO1 homolog 10-like isoform X1 [Chenopodium quinoa]	RecName: Full=Phosphate transporter PHO1 homolog 10; AltName: Full=Protein PHO1 homolog 10; Short=AtPHO1;H10;	SubName: Full=Uncharacterized protein {ECO:0000313|EMBL:KCW86568.1};	Predicted small molecule transporter	GO:0016021,integral component of membrane; GO:0005886,plasma membrane; GO:0005802,trans-Golgi network; GO:0006817,phosphate ion transport	PF03124.14:EXS family
gene-LOC110713025	0.3	0.7	0.56	1.63	2.01	4	19	42	30	66	121	227	2.36781	9.62823e-05	0.0104573	up	NW_018745403.1	1527036	1532179	-	LOC110713025	--	--	--	TORTIFOLIA1-like protein 4 [Chenopodium quinoa]	RecName: Full=TORTIFOLIA1-like protein 4 {ECO:0000303|PubMed:15324671};	SubName: Full=Uncharacterized protein {ECO:0000313|EMBL:KNA09717.1};	--	GO:0005874,microtubule; GO:0008017,microtubule binding	PF02985.22:HEAT repeat
gene-LOC110713140	10.62	16.86	18.04	5.51	5.39	5.48	356	533	502	117	170	163	-1.36656	0.00027193	0.0213578	down	NW_018745410.1	74801	83067	+	LOC110713140	--	K06941 23S rRNA (adenine2503-C2)-methyltransferase [EC:2.1.1.192] | (RefSeq) uncharacterized protein LOC110733288 (A)	--	uncharacterized protein LOC110713140 [Chenopodium quinoa]	--	SubName: Full=Uncharacterized protein {ECO:0000313|EMBL:KNA22018.1};	--	GO:0005737,cytoplasm; GO:0051536,iron-sulfur cluster binding; GO:0008173,RNA methyltransferase activity; GO:0006364,rRNA processing	PF04055.21:Radical SAM superfamily
gene-LOC110713174	0.71	1.32	2.95	8.21	9.83	7.62	24	42	83	176	313	229	2.45676	0.000194495	0.0167556	up	NW_018745410.1	671638	676878	+	LOC110713174	--	--	--	uncharacterized protein LOC110713174 [Chenopodium quinoa]	--	SubName: Full=Uncharacterized protein {ECO:0000313|EMBL:PKI42406.1};	FOG: Transposon-encoded proteins with TYA, reverse transcriptase, integrase domains in various combinations	--	PF03732.17:Retrotransposon gag protein
gene-LOC110713309	34.72	36.77	43.71	17.25	14.32	16.85	629	628	657	198	244	271	-1.1503	0.000426741	0.029197	down	NW_018742418.1	9303130	9305730	-	LOC110713309	--	--	--	uncharacterized protein At5g01610-like [Chenopodium quinoa]	RecName: Full=Uncharacterized protein At5g01610;	SubName: Full=Uncharacterized protein {ECO:0000313|EMBL:KNA08399.1};	--	--	PF04398.12:Protein of unknown function, DUF538
gene-LOC110713318	0.71	0.62	0.69	1.7	2.16	2.28	57	47	46	87	164	163	1.69342	6.898e-05	0.00853408	up	NW_018745410.1	2946427	2951685	+	LOC110713318	--	K13420 LRR receptor-like serine/threonine-protein kinase FLS2 [EC:2.7.11.1] | (RefSeq) LRR receptor-like serine/threonine-protein kinase FLS2 (A)	ko04016: MAPK signaling pathway - plant; ko04626: Plant-pathogen interaction	receptor-like protein kinase [Chenopodium quinoa]	RecName: Full=Receptor-like protein kinase; EC=2.7.11.1; Flags: Precursor;	SubName: Full=Uncharacterized protein {ECO:0000313|EMBL:KNA12321.1};	--	GO:0005576,extracellular region; GO:0016021,integral component of membrane; GO:0005886,plasma membrane; GO:0005524,ATP binding; GO:0004674,protein serine/threonine kinase activity; GO:0019199,transmembrane receptor protein kinase activity; GO:0006468,protein phosphorylation	PF00069.25:Protein kinase domain
gene-LOC110713561	41.13	95.74	67.7	25.14	16	20.19	700	1536	956	271	256	305	-1.5915	0.000235928	0.0190314	down	NW_018745448.1	26443	27279	+	LOC110713561	--	--	--	uncharacterized protein LOC110713561 [Chenopodium quinoa]	--	SubName: Full=Uncharacterized protein {ECO:0000313|EMBL:KNA21801.1};	--	--	PF03087.14:Arabidopsis protein of unknown function
gene-LOC110713611	25.83	21.19	17.3	32.23	57.42	48.64	520	402	289	411	1087	869	1.18502	0.00059091	0.0355507	up	NW_018745448.1	7013842	7016289	-	LOC110713611	--	K00799 glutathione S-transferase [EC:2.5.1.18] | (RefSeq) glutathione S-transferase U17-like (A)	ko00480: Glutathione metabolism	glutathione S-transferase U17-like [Chenopodium quinoa]	RecName: Full=Glutathione S-transferase U17; Short=AtGSTU17; EC=2.5.1.18; AltName: Full=GST class-tau member 17; AltName: Full=Glutathione S-transferase 30; AltName: Full=Protein EARLY RESPONSIVE TO DEHYDRATION 9;	SubName: Full=Glutathione S-transferase {ECO:0000313|EMBL:ABN13680.1};	Glutathione S-transferase	GO:0009507,chloroplast; GO:0005737,cytoplasm; GO:0005829,cytosol; GO:0004364,glutathione transferase activity; GO:0009704,de-etiolation; GO:0006749,glutathione metabolic process; GO:0048527,lateral root development; GO:0080148,negative regulation of response to water deprivation; GO:0040008,regulation of growth; GO:0060416,response to growth hormone; GO:0080167,response to karrikin; GO:0009651,re…	PF02798.20:Glutathione S-transferase, N-terminal domain
gene-LOC110714030	86.84	149.2	50.6	28.44	20.85	31.46	2945	4770	1424	611	665	947	-1.68525	8.51783e-05	0.00959977	down	NW_018745454.1	7045628	7049850	+	LOC110714030	--	--	--	WAT1-related protein At4g08300-like [Chenopodium quinoa]	RecName: Full=WAT1-related protein At1g21890;	RecName: Full=WAT1-related protein {ECO:0000256|RuleBase:RU363077};	--	GO:0016021,integral component of membrane; GO:0005886,plasma membrane; GO:0015171,amino acid transmembrane transporter activity; GO:0032973,amino acid export across plasma membrane; GO:0080144,amino acid homeostasis; GO:0043090,amino acid import	PF00892.20:EamA-like transporter family
gene-LOC110714054	7.73	31.25	11.57	43.16	42.46	63.44	284	1083	353	1005	1468	2070	1.70338	0.00099362	0.0488928	up	NW_018745454.1	3457686	3461178	-	LOC110714054	--	K13459 disease resistance protein RPS2 | (RefSeq) disease resistance protein At4g27190-like isoform X1 (A)	ko04626: Plant-pathogen interaction	probable WRKY transcription factor 41 [Chenopodium quinoa]	RecName: Full=Probable WRKY transcription factor 41; AltName: Full=WRKY DNA-binding protein 41;	SubName: Full=Uncharacterized protein {ECO:0000313|EMBL:KNA14097.1};	--	GO:0005634,nucleus; GO:0003700,DNA-binding transcription factor activity; GO:0043565,sequence-specific DNA binding; GO:0006351,transcription, DNA-templated	PF03106.15:WRKY DNA -binding domain
gene-LOC110714120	2.97	12.17	8.99	8.3	55.6	79.84	131	506	329	232	2307	3127	2.61837	0.000570789	0.0349147	up	NW_018745454.1	3798200	3803272	-	LOC110714120	--	--	--	O-acyltransferase WSD1-like [Chenopodium quinoa]	RecName: Full=O-acyltransferase WSD1; AltName: Full=Diacylglycerol O-acyltransferase; Short=DGAT; EC=2.3.1.20; AltName: Full=Long-chain-alcohol O-fatty-acyltransferase; EC=2.3.1.75; AltName: Full=Wax synthase; Short=WS;	SubName: Full=Uncharacterized protein {ECO:0000313|EMBL:KNA25965.1};	--	GO:0005783,endoplasmic reticulum; GO:0005789,endoplasmic reticulum membrane; GO:0016021,integral component of membrane; GO:0005886,plasma membrane; GO:0102966,arachidoyl-CoA:1-dodecanol O-acyltransferase activity; GO:0004144,diacylglycerol O-acyltransferase activity; GO:0047196,long-chain-alcohol O-fatty-acyltransferase activity; GO:0103095,wax ester synthase activity; GO:0019432,triglyceride bio…	PF06974.13:Protein of unknown function (DUF1298)
gene-LOC110714205	162.14	121.62	187.91	44.62	65.77	77.32	1434	1014	1379	250	547	607	-1.27373	0.000307741	0.0234235	down	NW_018745454.1	342453	342887	-	LOC110714205	--	K09481 protein transport protein SEC61 subunit beta | (RefSeq) protein transport protein Sec61 subunit beta-like (A)	ko03060: Protein export; ko04141: Protein processing in endoplasmic reticulum; ko04145: Phagosome	protein transport protein Sec61 subunit beta-like [Chenopodium quinoa]	RecName: Full=Protein transport protein Sec61 subunit beta;	RecName: Full=Protein transport protein Sec61 subunit beta {ECO:0000256|PIRNR:PIRNR006398};	Sec61 protein translocation complex, beta subunit	GO:0005789,endoplasmic reticulum membrane; GO:0031205,endoplasmic reticulum Sec complex; GO:0016021,integral component of membrane; GO:0005784,Sec61 translocon complex; GO:0005086,ARF guanyl-nucleotide exchange factor activity; GO:0031204,posttranslational protein targeting to membrane, translocation; GO:0006616,SRP-dependent cotranslational protein targeting to membrane, translocation	PF03911.16:Sec61beta family
gene-LOC110714754	25.32	33.41	40.33	14.23	15.28	15.56	902	1122	1192	321	512	492	-1.03914	0.000989538	0.0488928	down	NW_018745461.1	282242	287344	+	LOC110714754	--	K24348 UBX domain-containing protein 1/4 | (RefSeq) UBX domain-containing protein 1-like (A)	ko04141: Protein processing in endoplasmic reticulum	UBX domain-containing protein 1-like [Chenopodium quinoa]	RecName: Full=Plant UBX domain-containing protein 2 {ECO:0000303|Ref.8}; Short=PUX2 {ECO:0000303|Ref.8}; AltName: Full=AtPUB3 {ECO:0000303|PubMed:11587532}; AltName: Full=CDC48-interacting UBX-domain protein 2 {ECO:0000312|EMBL:AAS78924.1};	SubName: Full=Uncharacterized protein {ECO:0000313|EMBL:KNA21983.1};	Predicted ubiquitin regulatory protein	GO:0016020,membrane; GO:0046872,metal ion binding; GO:0050832,defense response to fungus; GO:0009620,response to fungus	PF09409.10:PUB domain
gene-LOC110714763	2.66	3.13	1.5	4.55	7.06	6.26	203	225	95	220	506	424	1.39954	0.000456417	0.030467	up	NW_018745461.1	565946	572026	+	LOC110714763	--	--	--	serine/arginine repetitive matrix protein 2-like [Chenopodium quinoa]	RecName: Full=Polyadenylate-binding protein-interacting protein 11; Short=PABP-interacting protein 11; Short=Poly(A)-binding protein-interacting protein 11; AltName: Full=PAM2-containing protein CID11; AltName: Full=Protein CTC-INTERACTING DOMAIN 11;	SubName: Full=Uncharacterized protein {ECO:0000313|EMBL:KNA03175.1};	--	GO:0005634,nucleus; GO:0003723,RNA binding	PF00630.19:Filamin/ABP280 repeat
gene-LOC110715010	1.4	1.87	2.02	2.1	10.42	14.26	65	82	78	62	456	589	2.36337	0.000483201	0.0316136	up	NW_018745461.1	1354315	1364512	+	LOC110715010	--	--	--	MACPF domain-containing protein At1g14780-like [Chenopodium quinoa]	RecName: Full=MACPF domain-containing protein At1g14780;	SubName: Full=Uncharacterized protein {ECO:0000313|EMBL:KNA11202.1};	--	GO:0009626,plant-type hypersensitive response	PF01823.19:MAC/Perforin domain
gene-LOC110715156	15.95	26.24	22.22	8.9	6.57	8.59	385	597	445	136	149	184	-1.30233	0.000435351	0.0294188	down	NW_018742433.1	482750	486356	+	LOC110715156	--	--	--	uncharacterized protein LOC110715156 [Chenopodium quinoa]	--	SubName: Full=Uncharacterized protein {ECO:0000313|EMBL:KNA13149.1};	--	GO:0016021,integral component of membrane	PF06749.12:Protein of unknown function (DUF1218)
gene-LOC110715264	11.35	21.55	24.75	41.89	37.96	59.45	452	809	818	1057	1422	2102	1.36228	0.000527672	0.0333316	up	NW_018745521.1	186122	189833	+	LOC110715264	--	--	--	uncharacterized protein LOC110715264 [Chenopodium quinoa]	--	SubName: Full=Uncharacterized protein {ECO:0000313|EMBL:KNA14247.1};	--	--	PF04720.12:PDDEXK-like family of unknown function
gene-LOC110715297	5.75	6.27	2.91	13.1	19.37	23.33	214	220	90	309	678	771	1.99185	7.71983e-07	0.000292014	up	NW_018745521.1	158172	161269	-	LOC110715297	--	K13430 serine/threonine-protein kinase PBS1 [EC:2.7.11.1] | (RefSeq) probable serine/threonine-protein kinase PBL7 (A)	ko04626: Plant-pathogen interaction	receptor-like cytoplasmic kinase 176 [Chenopodium quinoa]	RecName: Full=Receptor-like cytoplasmic kinase 176 {ECO:0000303|PubMed:19825577}; Short=OsRLCK176 {ECO:0000303|PubMed:19825577}; EC=2.7.11.1 {ECO:0000305};	SubName: Full=Uncharacterized protein {ECO:0000313|EMBL:KNA09052.1};	Serine/threonine protein kinase	GO:0005886,plasma membrane; GO:0005524,ATP binding; GO:0004675,transmembrane receptor protein serine/threonine kinase activity; GO:0007166,cell surface receptor signaling pathway; GO:0045087,innate immune response; GO:0006468,protein phosphorylation	PF00069.25:Protein kinase domain
gene-LOC110715365	9.7	18.08	19.13	37.49	35.4	36.62	431	757	705	1055	1479	1444	1.33822	0.000251619	0.0200497	up	NW_018745523.1	3130900	3137461	-	LOC110715365	--	--	--	O-acyltransferase WSD1-like isoform X1 [Chenopodium quinoa]	RecName: Full=O-acyltransferase WSD1; AltName: Full=Diacylglycerol O-acyltransferase; Short=DGAT; EC=2.3.1.20; AltName: Full=Long-chain-alcohol O-fatty-acyltransferase; EC=2.3.1.75; AltName: Full=Wax synthase; Short=WS;	SubName: Full=Uncharacterized protein {ECO:0000313|EMBL:KNA03302.1};	--	GO:0005783,endoplasmic reticulum; GO:0005789,endoplasmic reticulum membrane; GO:0016021,integral component of membrane; GO:0005886,plasma membrane; GO:0102966,arachidoyl-CoA:1-dodecanol O-acyltransferase activity; GO:0004144,diacylglycerol O-acyltransferase activity; GO:0047196,long-chain-alcohol O-fatty-acyltransferase activity; GO:0103095,wax ester synthase activity; GO:0019432,triglyceride bio…	PF06974.13:Protein of unknown function (DUF1298)
gene-LOC110715533	62.47	52.96	51.21	141.39	120.8	204.65	1185	947	806	1699	2155	3446	1.56517	1.24758e-07	6.41508e-05	up	NW_018745523.1	3119816	3120964	-	LOC110715533	--	--	--	uncharacterized protein LOC110715533 [Chenopodium quinoa]	--	SubName: Full=Uncharacterized protein {ECO:0000313|EMBL:KNA21688.1};	Nuclear localization sequence binding protein	--	--
gene-LOC110715588	3.67	1.15	1.91	4.18	41.7	50.84	125	37	54	90	1334	1535	3.82049	4.72251e-06	0.00119548	up	NW_018745523.1	1757356	1759028	-	LOC110715588	--	--	--	uncharacterized protein LOC110715588 [Chenopodium quinoa]	--	SubName: Full=Uncharacterized protein {ECO:0000313|EMBL:KNA19229.1};	--	--	PF04720.12:PDDEXK-like family of unknown function
gene-LOC110715590	8.59	1.51	5.32	7.25	122.98	119.44	247	41	127	132	3325	3048	3.98209	1.87681e-05	0.00341237	up	NW_018745523.1	3446888	3450510	-	LOC110715590	--	--	--	GDSL esterase/lipase APG-like [Chenopodium quinoa]	RecName: Full=GDSL esterase/lipase APG; EC=3.1.1.-; AltName: Full=Extracellular lipase APG; Flags: Precursor;	SubName: Full=Uncharacterized protein {ECO:0000313|EMBL:KNA16300.1};	--	GO:0048046,apoplast; GO:0016788,hydrolase activity, acting on ester bonds; GO:0016042,lipid catabolic process	PF00657.22:GDSL-like Lipase/Acylhydrolase
gene-LOC110715677	70.21	124.17	233.3	43.96	21.57	45.51	2070	3451	5707	821	598	1191	-1.8539	0.000869682	0.0447397	down	NW_018745523.1	700094	704642	+	LOC110715677	--	K01363 cathepsin B [EC:3.4.22.1] | (RefSeq) cathepsin B-like protease 2 (A)	--	cathepsin B-like protease 2 [Chenopodium quinoa]	RecName: Full=Cathepsin B-like protease 2 {ECO:0000305}; EC=3.4.22.- {ECO:0000305}; AltName: Full=Cathepsin B2 {ECO:0000305}; Short=AtCathB2 {ECO:0000303|PubMed:19453434}; Flags: Precursor;	SubName: Full=Uncharacterized protein {ECO:0000313|EMBL:KNA07799.1};	Cysteine proteinase Cathepsin L	GO:0005615,extracellular space; GO:0005764,lysosome; GO:0005773,vacuole; GO:0004197,cysteine-type endopeptidase activity; GO:0006952,defense response; GO:0051603,proteolysis involved in cellular protein catabolic process; GO:0050790,regulation of catalytic activity	PF00112.23:Papain family cysteine protease
gene-LOC110715716	0.76	0.77	0.78	3.49	2.86	2.28	49	47	42	143	174	131	2.02799	4.3739e-05	0.00642593	up	NW_018745533.1	2326332	2329597	-	LOC110715716	--	K20617 cytochrome P450 family 71 subfamily A | (RefSeq) cytochrome P450 71A1-like (A)	--	geraniol 8-hydroxylase-like [Chenopodium quinoa]	RecName: Full=Geraniol 8-hydroxylase; EC=1.14.13.152; AltName: Full=Cytochrome P450 76B10; AltName: Full=Geraniol 10-hydroxylase; Short=SmG10H;	SubName: Full=Uncharacterized protein {ECO:0000313|EMBL:ALT04747.1};	Cytochrome P450 CYP2 subfamily	GO:0005789,endoplasmic reticulum membrane; GO:0016021,integral component of membrane; GO:0102811,geraniol 10-hydroxylase activity; GO:0020037,heme binding; GO:0005506,iron ion binding; GO:0016709,oxidoreductase activity, acting on paired donors, with incorporation or reduction of molecular oxygen, NAD(P)H as one donor, and incorporation of one atom of oxygen; GO:0016099,monoterpenoid biosynthetic…	PF00067.22:Cytochrome P450
gene-LOC110716178	26.94	40.07	42.03	12.81	13.5	16.46	883	1238	1143	266	416	479	-1.25535	2.97487e-05	0.00487065	down	NW_018745546.1	1175050	1200922	+	LOC110716178	--	--	--	probable feruloyl esterase A isoform X1 [Chenopodium quinoa]	RecName: Full=Phospholipase A1 EG1, chloroplastic/mitochondrial {ECO:0000305}; EC=3.1.1.32 {ECO:0000305|PubMed:27367609}; AltName: Full=Protein EXTRA GLUME 1 {ECO:0000303|PubMed:18980657}; Flags: Precursor;	SubName: Full=Uncharacterized protein {ECO:0000313|EMBL:KMS96148.1};	Predicted lipase	GO:0009507,chloroplast; GO:0005739,mitochondrion; GO:0052740,1-acyl-2-lysophosphatidylserine acylhydrolase activity; GO:0008970,phospholipase A1 activity; GO:0052739,phosphatidylserine 1-acylhydrolase activity; GO:0004620,phospholipase activity; GO:0010582,floral meristem determinacy; GO:0048449,floral organ formation; GO:0016042,lipid catabolic process	PF01764.25:Lipase (class 3)
gene-LOC110716256	35.1	34.76	30.23	9.62	15.69	17.08	1037	968	741	180	436	448	-1.16244	5.48599e-05	0.00742957	down	NW_018745569.1	340928	351401	+	LOC110716256	--	K15498 serine/threonine-protein phosphatase 6 catalytic subunit [EC:3.1.3.16] | (RefSeq) phytochrome-associated serine/threonine-protein phosphatase 1-like (A)	--	hypothetical protein COLO4_33142 [Corchorus olitorius]	RecName: Full=Phytochrome-associated serine/threonine-protein phosphatase; EC=3.1.3.16; AltName: Full=PsFyPP;	RecName: Full=Serine/threonine-protein phosphatase {ECO:0000256|RuleBase:RU004273}; EC=3.1.3.16 {ECO:0000256|RuleBase:RU004273};	Serine/threonine specific protein phosphatase involved in cell cycle control, PP2A-related	GO:0005737,cytoplasm; GO:0046872,metal ion binding; GO:0004721,phosphoprotein phosphatase activity	PF00149.28:Calcineurin-like phosphoesterase
gene-LOC110716292	17.47	17.97	22.24	7.26	7.19	7.1	266	258	281	70	103	96	-1.32422	0.000569297	0.0348974	down	NW_018745569.1	111226	117489	-	LOC110716292	--	K15171 transcription elongation factor SPT4 | (RefSeq) transcription elongation factor SPT4 homolog 2-like (A)	--	transcription elongation factor SPT4 homolog 2-like [Chenopodium quinoa]	RecName: Full=Transcription elongation factor SPT4 homolog 2;	RecName: Full=Transcription elongation factor SPT4 homolog {ECO:0000256|PIRNR:PIRNR025023};	Transcription elongation factor SPT4	GO:0032044,DSIF complex; GO:0003700,DNA-binding transcription factor activity; GO:0000993,RNA polymerase II complex binding; GO:0003727,single-stranded RNA binding; GO:0008270,zinc ion binding; GO:0006325,chromatin organization; GO:0006397,mRNA processing; GO:0032786,positive regulation of DNA-templated transcription, elongation; GO:0034243,regulation of transcription elongation from RNA polymera…	PF06093.13:Spt4/RpoE2 zinc finger
gene-LOC110716330	23.53	27.99	22.68	28.52	55.54	72.47	1314	1474	1051	1009	2917	3593	1.13818	0.000827971	0.0435963	up	NW_018742441.1	625193	639641	-	LOC110716330	--	--	--	protein LNK2-like [Chenopodium quinoa]	RecName: Full=Protein LNK2 {ECO:0000303|PubMed:23818596}; AltName: Full=Night light-inducible and clock-regulated 2 {ECO:0000303|PubMed:23818596};	SubName: Full=Uncharacterized protein {ECO:0000313|EMBL:KNA11738.1}; Flags: Fragment;	--	GO:0005634,nucleus; GO:0006355,regulation of transcription, DNA-templated; GO:0048511,rhythmic process; GO:0006351,transcription, DNA-templated	--
gene-LOC110716549	2.93	2.89	2.54	5.2	7.82	9.68	57	53	41	64	143	167	1.51375	0.00086929	0.0447397	up	NW_018745590.1	112851	114775	-	LOC110716549	--	--	--	uncharacterized protein LOC110716549 isoform X1 [Chenopodium quinoa]	RecName: Full=Vascular-related unknown protein 1 {ECO:0000303|PubMed:24567189};	SubName: Full=Uncharacterized protein {ECO:0000313|EMBL:KMS94727.1};	--	GO:0005829,cytosol; GO:0005634,nucleus; GO:0010089,xylem development	--
gene-LOC110716567	32.89	34.85	44.07	12.83	14.11	17.05	850	849	945	210	343	391	-1.26463	2.19676e-05	0.00388673	down	NW_018745617.1	706439	711530	-	LOC110716567	--	K12272 signal recognition particle receptor subunit beta | (RefSeq) signal recognition particle receptor subunit beta-like (A)	ko03060: Protein export	signal recognition particle receptor subunit beta-like [Chenopodium quinoa]	--	SubName: Full=Uncharacterized protein {ECO:0000313|EMBL:KNA09201.1};	Signal recognition particle receptor, beta subunit (small G protein superfamily)	GO:0016021,integral component of membrane; GO:0005622,intracellular; GO:0005525,GTP binding; GO:0007264,small GTPase mediated signal transduction	PF09439.10:Signal recognition particle receptor beta subunit
gene-LOC110716595	17.4	24.53	25.88	4.41	7.54	10.32	243	323	300	39	99	128	-1.53912	0.000452383	0.0302643	down	NW_018745617.1	1221792	1226240	+	LOC110716595	--	--	--	--	--	--	--	--	--
gene-LOC110716734	3.95	2.93	1.69	5.67	17.75	24.11	166	116	59	151	701	899	2.50575	2.36266e-05	0.00413579	up	NW_018745617.1	3084486	3092001	-	LOC110716734	--	K01723 hydroperoxide dehydratase [EC:4.2.1.92] | (RefSeq) allene oxide synthase 1, chloroplastic-like (A)	ko00592: alpha-Linolenic acid metabolism	fatty acid hydroperoxide lyase, chloroplastic-like [Chenopodium quinoa]	RecName: Full=Fatty acid hydroperoxide lyase, chloroplastic {ECO:0000303|PubMed:10859201}; Short=LeHPL {ECO:0000303|PubMed:10859201}; EC=4.2.99.- {ECO:0000305}; AltName: Full=Cytochrome P450 74B {ECO:0000305};	SubName: Full=Uncharacterized protein {ECO:0000313|EMBL:KNA13017.1};	--	GO:0009941,chloroplast envelope; GO:0009707,chloroplast outer membrane; GO:0016021,integral component of membrane; GO:0020037,heme binding; GO:0005506,iron ion binding; GO:0016829,lyase activity; GO:0004497,monooxygenase activity; GO:0016705,oxidoreductase activity, acting on paired donors, with incorporation or reduction of molecular oxygen; GO:0006952,defense response; GO:0031408,oxylipin biosy…	PF00067.22:Cytochrome P450
gene-LOC110716959	4.75	8.99	13.52	1.63	1.89	2.19	83	148	196	18	31	34	-2.17289	0.000552744	0.0343861	down	NW_018745650.1	4755469	4757387	-	LOC110716959	--	--	--	--	--	--	--	--	--
gene-LOC110717443	13.39	27.86	18.64	40.99	41.22	52.52	361	708	417	700	1045	1257	1.28673	0.000102157	0.0108152	up	NW_018745684.1	4047434	4048759	+	LOC110717443	--	K20604 mitogen-activated protein kinase kinase 9 [EC:2.7.12.2] | (RefSeq) mitogen-activated protein kinase kinase 9-like (A)	ko04016: MAPK signaling pathway - plant	mitogen-activated protein kinase kinase 9-like [Chenopodium quinoa]	RecName: Full=Mitogen-activated protein kinase kinase 9; Short=AtMKK9; Short=MAP kinase kinase 9; EC=2.7.12.2;	SubName: Full=Uncharacterized protein {ECO:0000313|EMBL:KNA17854.1};	Mitogen-activated protein kinase kinase (MAP2K)	GO:0005737,cytoplasm; GO:0005634,nucleus; GO:0005524,ATP binding; GO:0004708,MAP kinase kinase activity; GO:0030295,protein kinase activator activity; GO:0004674,protein serine/threonine kinase activity; GO:0010120,camalexin biosynthetic process; GO:0009693,ethylene biosynthetic process; GO:0009873,ethylene-activated signaling pathway; GO:0010150,leaf senescence; GO:0045893,positive regulation of…	PF00069.25:Protein kinase domain
gene-LOC110717523	9.27	6.48	9.55	1.32	2.5	3.44	276	182	236	25	70	91	-1.7572	0.000604029	0.0358658	down	NW_018745684.1	8386141	8390698	-	LOC110717523	--	K19222 1,4-dihydroxy-2-naphthoyl-CoA hydrolase [EC:3.1.2.28] | (RefSeq) 1,4-dihydroxy-2-naphthoyl-CoA thioesterase 1-like (A)	ko00130: Ubiquinone and other terpenoid-quinone biosynthesis	1,4-dihydroxy-2-naphthoyl-CoA thioesterase 1-like [Chenopodium quinoa]	RecName: Full=1,4-dihydroxy-2-naphthoyl-CoA thioesterase 1 {ECO:0000303|PubMed:22372525}; Short=AtDHNAT1 {ECO:0000303|PubMed:22372525}; Short=DHNA-CoA thioesterase 1 {ECO:0000303|PubMed:22372525}; EC=3.1.2.- {ECO:0000305};	SubName: Full=Uncharacterized protein {ECO:0000313|EMBL:KMS98619.1};	HGG motif-containing thioesterase	GO:0005777,peroxisome; GO:0016787,hydrolase activity; GO:0042372,phylloquinone biosynthetic process; GO:0051289,protein homotetramerization	PF03061.22:Thioesterase superfamily
gene-LOC110717619	10.11	12.23	13.72	4.91	3.42	3.74	286	326	322	88	91	94	-1.46285	0.000580072	0.0351178	down	NW_018745684.1	2558555	2563752	+	LOC110717619	--	K11344 chromatin modification-related protein EAF6 | (RefSeq) chromatin modification-related protein MEAF6-like isoform X1 (A)	--	chromatin modification-related protein MEAF6-like isoform X1 [Chenopodium quinoa]	--	SubName: Full=Uncharacterized protein {ECO:0000313|EMBL:KNA06311.1};	Uncharacterized conserved protein	GO:0000123,histone acetyltransferase complex; GO:0016573,histone acetylation	PF09340.10:Histone acetyltransferase subunit NuA4
gene-LOC110717765	25.6	28.84	10.4	46.81	50.53	64.75	923	980	311	1069	1713	2072	1.43337	0.000613761	0.0362315	up	NW_018745684.1	8804843	8813058	+	LOC110717765	--	K07198 5'-AMP-activated protein kinase, catalytic alpha subunit [EC:2.7.11.11] | (RefSeq) CBL-interacting serine/threonine-protein kinase 1-like (A)	--	CBL-interacting serine/threonine-protein kinase 1-like [Chenopodium quinoa]	RecName: Full=CBL-interacting serine/threonine-protein kinase 1; EC=2.7.11.1; AltName: Full=SNF1-related kinase 3.16; AltName: Full=SOS2-like protein kinase PKS13;	RecName: Full=Non-specific serine/threonine protein kinase {ECO:0000256|SAAS:SAAS00351747}; EC=2.7.11.1 {ECO:0000256|SAAS:SAAS00351747};	Serine/threonine protein kinase	GO:0005737,cytoplasm; GO:0005634,nucleus; GO:0005886,plasma membrane; GO:0005524,ATP binding; GO:0004674,protein serine/threonine kinase activity; GO:0035556,intracellular signal transduction; GO:0006468,protein phosphorylation; GO:0009737,response to abscisic acid; GO:0006970,response to osmotic stress; GO:0009651,response to salt stress	PF00069.25:Protein kinase domain
gene-LOC110717812	4.55	8.85	47.25	2.02	1.09	1.04	89	163	766	25	20	18	-3.78214	7.57052e-05	0.00902675	down	NW_018745684.1	1221761	1224354	+	LOC110717812	--	--	--	uncharacterized protein LOC110717812 [Chenopodium quinoa]	--	SubName: Full=Uncharacterized protein {ECO:0000313|EMBL:CBI25775.3};	--	GO:0016021,integral component of membrane	--
gene-LOC110717872	13.01	18.49	16.52	4.11	3.21	6.78	465	623	490	93	108	215	-1.68494	1.60796e-05	0.00305875	down	NW_018745684.1	7335745	7362022	+	LOC110717872	--	K16296 serine carboxypeptidase-like clade I [EC:3.4.16.-] | (RefSeq) serine carboxypeptidase-like 16 isoform X1 (A)	--	serine carboxypeptidase-like 16 isoform X1 [Chenopodium quinoa]	RecName: Full=Serine carboxypeptidase-like 18; EC=3.4.16.-; Flags: Precursor;	SubName: Full=Uncharacterized protein {ECO:0000313|EMBL:KNA20254.1}; Flags: Fragment;	Serine carboxypeptidases (lysosomal cathepsin A)	GO:0005576,extracellular region; GO:0004180,carboxypeptidase activity; GO:0016747,transferase activity, transferring acyl groups other than amino-acyl groups; GO:0019748,secondary metabolic process	PF00450.22:Serine carboxypeptidase
gene-LOC110718088	0.04	0.15	0.1	1.07	0.64	1.92	2	7	4	34	30	85	3.77329	8.87457e-05	0.00986666	up	NW_018745684.1	4879161	4881617	-	LOC110718088	--	K13466 EIX receptor 1/2 | (RefSeq) LRR receptor-like serine/threonine-protein kinase GSO1 (A)	ko04626: Plant-pathogen interaction	LRR receptor-like serine/threonine-protein kinase GSO1 [Chenopodium quinoa]	RecName: Full=Receptor-like protein EIX2 {ECO:0000305}; AltName: Full=EIX receptor 2 {ECO:0000312|EMBL:AAR28378.1}; Flags: Precursor;	SubName: Full=Uncharacterized protein {ECO:0000313|EMBL:KNA24898.1};	FOG: Leucine rich repeat	GO:0016021,integral component of membrane; GO:0005886,plasma membrane; GO:0050832,defense response to fungus	PF13855.6:Leucine rich repeat
gene-LOC110718484	0.69	0.15	0	2.68	3.06	12.03	20	4	0	49	83	308	4.37994	0.000495089	0.0320726	up	NW_018742461.1	281656	283344	+	LOC110718484	--	K16040 trans-resveratrol di-O-methyltransferase [EC:2.1.1.240] | (RefSeq) trans-resveratrol di-O-methyltransferase-like (A)	ko00945: Stilbenoid, diarylheptanoid and gingerol biosynthesis	(RS)-norcoclaurine 6-O-methyltransferase-like [Chenopodium quinoa]	RecName: Full=Acetylserotonin O-methyltransferase {ECO:0000305}; EC=2.1.1.4 {ECO:0000269|PubMed:26484897}; AltName: Full=N-acetylserotonin O-methyltransferase {ECO:0000303|PubMed:26484897}; Short=AtASMT {ECO:0000303|PubMed:26484897};	SubName: Full=Uncharacterized protein {ECO:0000313|EMBL:KNA03838.1};	Hydroxyindole-O-methyltransferase and related SAM-dependent methyltransferases	GO:0005737,cytoplasm; GO:0017096,acetylserotonin O-methyltransferase activity; GO:0046983,protein dimerization activity; GO:0030187,melatonin biosynthetic process	PF00891.18:O-methyltransferase domain
gene-LOC110718512	16.33	20.55	22.62	7.15	6.88	7.5	429	509	493	119	170	175	-1.36583	3.11504e-05	0.00502515	down	NW_018742204.1	11712962	11716554	+	LOC110718512	--	--	--	uncharacterized protein LOC110718512 [Chenopodium quinoa]	--	SubName: Full=Uncharacterized protein {ECO:0000313|EMBL:KNA13149.1};	--	GO:0016021,integral component of membrane	PF06749.12:Protein of unknown function (DUF1218)
gene-LOC110718578	23.36	0.72	1.48	15.9	266.01	155.26	761	22	40	328	8148	4489	4.07527	0.000712202	0.0396811	up	NW_018742461.1	1351501	1353189	-	LOC110718578	--	--	--	proline-rich protein 4-like [Chenopodium quinoa]	RecName: Full=Proline-rich protein 4; Short=AtPRP4; Flags: Precursor;	SubName: Full=Uncharacterized protein {ECO:0000313|EMBL:CCB60649.1};	--	GO:0005618,cell wall; GO:0005576,extracellular region	PF01190.17:Pollen proteins Ole e I like
gene-LOC110718595	72.11	135.83	183.05	25.14	10.11	18.69	865	1536	1822	191	114	199	-2.73185	6.1298e-07	0.000255393	down	NW_018742461.1	1512153	1513689	+	LOC110718595	--	--	--	gibberellin-regulated protein 1-like [Chenopodium quinoa]	RecName: Full=Snakin-2; Flags: Precursor;	SubName: Full=Uncharacterized protein {ECO:0000313|EMBL:KNA03885.1};	--	GO:0005618,cell wall; GO:0005576,extracellular region; GO:0006952,defense response	PF02704.14:Gibberellin regulated protein
gene-LOC110718599	2.5	4.65	1.79	6.63	7.2	17.86	69	121	41	116	187	438	1.90951	0.00100262	0.0491413	up	NW_018742461.1	1548508	1550466	+	LOC110718599	--	K09866 aquaporin-4 | (RefSeq) aquaporin-like (A)	--	aquaporin-like [Chenopodium quinoa]	RecName: Full=Aquaporin PIP1-5; AltName: Full=Plasma membrane intrinsic protein 1-5; AltName: Full=ZmPIP1-5; AltName: Full=ZmPIP1-5b; AltName: Full=ZmPIP1;5;	SubName: Full=Uncharacterized protein {ECO:0000313|EMBL:KNA14964.1};	Aquaporin (major intrinsic protein family)	GO:0016021,integral component of membrane; GO:0005886,plasma membrane; GO:0015267,channel activity	PF00230.20:Major intrinsic protein
gene-LOC110718862	247.79	257.15	331.69	133.71	91.12	118.71	5023	4914	5579	1717	1737	2136	-1.17731	0.000496745	0.0321167	down	NW_018742461.1	4310044	4313752	+	LOC110718862	--	K02155 V-type H+-transporting ATPase 16kDa proteolipid subunit | (RefSeq) V-type proton ATPase 16 kDa proteolipid subunit (A)	ko00190: Oxidative phosphorylation; ko04145: Phagosome	V-type proton ATPase 16 kDa proteolipid subunit [Chenopodium quinoa]	RecName: Full=V-type proton ATPase 16 kDa proteolipid subunit; Short=V-ATPase 16 kDa proteolipid subunit; AltName: Full=Vacuolar proton pump 16 kDa proteolipid subunit;	RecName: Full=V-type proton ATPase proteolipid subunit {ECO:0000256|RuleBase:RU363060};	Vacuolar H+-ATPase V0 sector, subunits c/c'	GO:0016021,integral component of membrane; GO:0033179,proton-transporting V-type ATPase, V0 domain; GO:0005774,vacuolar membrane; GO:0015078,proton transmembrane transporter activity; GO:0015991,ATP hydrolysis coupled proton transport	PF00137.21:ATP synthase subunit C
gene-LOC110718913	0	0.31	0	3.4	3.47	4.96	0	10	0	74	112	151	5.45369	5.09788e-05	0.0070195	up	NW_018742461.1	4852405	4854809	+	LOC110718913	--	--	--	--	--	--	--	--	--
gene-LOC110719214	1.45	0.89	1.01	0.9	18.37	13.48	38	22	22	15	452	313	3.2989	0.000530196	0.0334257	up	NW_018742484.1	6220117	6221403	-	LOC110719214	--	K22683 aspartyl protease family protein [EC:3.4.23.-] | (RefSeq) aspartic proteinase nepenthesin-2-like (A)	--	basic 7S globulin 2-like [Chenopodium quinoa]	RecName: Full=Basic 7S globulin 2; AltName: Full=SBg7S; Short=Bg; Contains: RecName: Full=Basic 7S globulin 2 high kDa subunit; Contains: RecName: Full=Basic 7S globulin 2 low kDa subunit; Flags: Precursor;	SubName: Full=Uncharacterized protein {ECO:0000313|EMBL:KNA05556.1};	Aspartyl protease	GO:0004190,aspartic-type endopeptidase activity; GO:0045735,nutrient reservoir activity; GO:0030163,protein catabolic process; GO:0006508,proteolysis	PF14541.6:Xylanase inhibitor C-terminal
gene-LOC110719378	12.37	19.15	19.75	7.06	5.68	7.23	401	585	531	145	173	208	-1.25196	0.000665409	0.0379596	down	NW_018742484.1	2522822	2527565	+	LOC110719378	--	K14423 plant 4,4-dimethylsterol C-4alpha-methyl-monooxygenase [EC:1.14.18.10] | (RefSeq) methylsterol monooxygenase 1-1-like (A)	ko00100: Steroid biosynthesis	methylsterol monooxygenase 1-1-like [Chenopodium quinoa]	RecName: Full=Methylsterol monooxygenase 1-1; EC=1.14.18.9 {ECO:0000269|PubMed:14653780}; AltName: Full=Sterol 4-alpha-methyl-oxidase 1-1; Short=AtSMO1-1;	SubName: Full=Uncharacterized protein {ECO:0000313|EMBL:KNA15593.1};	C-4 sterol methyl oxidase	GO:0005789,endoplasmic reticulum membrane; GO:0016021,integral component of membrane; GO:0016020,membrane; GO:0000254,C-4 methylsterol oxidase activity; GO:0005506,iron ion binding; GO:0080064,4,4-dimethyl-9beta,19-cyclopropylsterol oxidation; GO:0016126,sterol biosynthetic process	PF04116.13:Fatty acid hydroxylase superfamily
gene-LOC110719538	3.47	0.28	0.51	3.95	38.99	30.3	155	12	19	112	1640	1203	4.083	7.35446e-05	0.00885621	up	NW_018742484.1	5758551	5760750	-	LOC110719538	--	K15398 fatty acid omega-hydroxylase [EC:1.14.-.-] | (RefSeq) cytochrome P450 86A22-like (A)	ko00073: Cutin, suberine and wax biosynthesis	cytochrome P450 86A22-like [Chenopodium quinoa]	RecName: Full=Cytochrome P450 86A22 {ECO:0000303|PubMed:19940120}; EC=1.14.13.204 {ECO:0000269|PubMed:19940120}; AltName: Full=Long-chain acyl-CoA omega-monooxygenase {ECO:0000305};	SubName: Full=Uncharacterized protein {ECO:0000313|EMBL:KNA25514.1};	Cytochrome P450 CYP4/CYP19/CYP26 subfamilies	GO:0016021,integral component of membrane; GO:0020037,heme binding; GO:0005506,iron ion binding; GO:0016709,oxidoreductase activity, acting on paired donors, with incorporation or reduction of molecular oxygen, NAD(P)H as one donor, and incorporation of one atom of oxygen; GO:0035336,long-chain fatty-acyl-CoA metabolic process	PF00067.22:Cytochrome P450
gene-LOC110719582	0.72	1.85	1.32	3.35	7.05	11.42	30	73	46	89	278	425	2.55674	1.71793e-05	0.00319409	up	NW_018742484.1	6500183	6502897	-	LOC110719582	--	K20772 1-aminocyclopropane-1-carboxylate synthase 1/2/6 [EC:4.4.1.14] | (RefSeq) 1-aminocyclopropane-1-carboxylate synthase-like (A)	ko00270: Cysteine and methionine metabolism; ko04016: MAPK signaling pathway - plant	1-aminocyclopropane-1-carboxylate synthase-like [Chenopodium quinoa]	RecName: Full=1-aminocyclopropane-1-carboxylate synthase; Short=ACC synthase; EC=4.4.1.14; AltName: Full=S-adenosyl-L-methionine methylthioadenosine-lyase;	SubName: Full=Uncharacterized protein {ECO:0000313|EMBL:KNA25490.1};	1-aminocyclopropane-1-carboxylate synthase, and related proteins	GO:0016847,1-aminocyclopropane-1-carboxylate synthase activity; GO:0030170,pyridoxal phosphate binding; GO:0009693,ethylene biosynthetic process; GO:0009835,fruit ripening	PF00155.21:Aminotransferase class I and II
gene-LOC110719616	1.63	1.33	4.02	0	0.09	0.19	39	30	80	0	2	4	-4.60545	0.000261263	0.0206185	down	NW_018742484.1	7005848	7008085	+	LOC110719616	--	--	--	uncharacterized protein LOC110719616 [Chenopodium quinoa]	--	--	--	--	--
gene-LOC110719854	7.39	14	9.75	4.03	3.56	3.97	327	584	358	113	148	156	-1.30299	0.000506564	0.0324329	down	NW_018742493.1	271101	283830	-	LOC110719854	--	--	--	--	--	--	--	--	--
gene-LOC110720024	80.24	51.47	58.6	140.93	154.95	208.91	1571	950	952	1748	2853	3631	1.47518	4.14586e-06	0.00108283	up	NW_018742523.1	4601776	4602738	+	LOC110720024	--	K03686 molecular chaperone DnaJ | (RefSeq) uncharacterized protein LOC110703228 isoform X1 (A)	--	chaperone protein dnaJ 11, chloroplastic-like [Chenopodium quinoa]	RecName: Full=Chaperone protein dnaJ 11, chloroplastic; Short=AtDjC11; Short=AtJ11; Flags: Precursor;	SubName: Full=Uncharacterized protein {ECO:0000313|EMBL:KNA20631.1};	Molecular chaperone (DnaJ superfamily)	GO:0009507,chloroplast; GO:0009570,chloroplast stroma; GO:0005634,nucleus; GO:0009536,plastid	PF00226.31:DnaJ domain
gene-LOC110720095	2.16	6.02	2.2	5.08	16.07	15.15	136	358	115	203	953	848	1.9105	0.000979818	0.0487819	up	NW_018742541.1	28658	42466	-	LOC110720095	--	K14494 DELLA protein | (RefSeq) DELLA protein GAI1-like (A)	ko04075: Plant hormone signal transduction	chitin-inducible gibberellin-responsive protein 1-like [Chenopodium quinoa]	RecName: Full=Chitin-inducible gibberellin-responsive protein 1;	SubName: Full=Uncharacterized protein {ECO:0000313|EMBL:KNA20000.1};	--	GO:0005634,nucleus; GO:0003700,DNA-binding transcription factor activity; GO:0043565,sequence-specific DNA binding; GO:0006355,regulation of transcription, DNA-templated; GO:0006351,transcription, DNA-templated	PF03514.14:GRAS domain family
gene-LOC110720112	60.87	74.83	110.7	16.72	16.52	25.04	1328	1539	2004	231	339	485	-2.0092	7.34992e-08	4.03131e-05	down	NW_018742541.1	642168	644708	+	LOC110720112	--	--	--	uncharacterized protein LOC110720112 [Chenopodium quinoa]	--	SubName: Full=Uncharacterized protein {ECO:0000313|EMBL:EMJ13323.1};	--	GO:0016021,integral component of membrane	PF06749.12:Protein of unknown function (DUF1218)
gene-LOC110720122	0	0	0	0	4.84	5	0	0	0	0	174	170	9.30308	9.09084e-05	0.00997235	up	NW_018742541.1	825369	832081	-	LOC110720122	--	--	--	--	--	--	--	--	--
gene-LOC110720352	2.34	4.65	0.97	13.36	7.48	10.96	146	273	50	527	438	606	2.17441	0.000334226	0.0244968	up	NW_018742204.1	16824159	16830752	+	LOC110720352	--	--	--	phosphate transporter PHO1 homolog 1-like [Chenopodium quinoa]	RecName: Full=Phosphate transporter PHO1 homolog 1; AltName: Full=Protein PHO1 homolog 1; Short=AtPHO1;H1;	SubName: Full=Uncharacterized protein {ECO:0000313|EMBL:KNA25584.1}; Flags: Fragment;	Predicted small molecule transporter	GO:0016021,integral component of membrane; GO:0005886,plasma membrane; GO:0005802,trans-Golgi network; GO:0016036,cellular response to phosphate starvation; GO:0006817,phosphate ion transport	PF03124.14:EXS family
gene-LOC110720367	0.18	0.74	0.36	4.58	5.94	13.17	6	23	10	96	185	387	4.29388	6.68008e-10	7.09144e-07	up	NW_018742556.1	694291	698170	+	LOC110720367	--	--	--	uncharacterized protein LOC110720367 [Chenopodium quinoa]	RecName: Full=Putative glutamine amidotransferase GAT1_2.1 {ECO:0000305}; EC=2.4.2.- {ECO:0000305}; AltName: Full=Class I glutamine amidotransferase {ECO:0000303|PubMed:22885937}; AltName: Full=GAT1_2 domain-containing protein 1 {ECO:0000305};	SubName: Full=Uncharacterized protein {ECO:0000313|EMBL:ESR43968.1};	--	GO:0016787,hydrolase activity; GO:0016740,transferase activity; GO:0006541,glutamine metabolic process; GO:2000032,regulation of secondary shoot formation	PF07722.13:Peptidase C26
gene-LOC110720398	26.68	31.15	95.27	10.55	11.92	16.84	1014	1116	3004	254	426	568	-1.91948	0.000997091	0.048975	down	NW_018742556.1	964130	969637	-	LOC110720398	--	K01054 acylglycerol lipase [EC:3.1.1.23] | (RefSeq) caffeoylshikimate esterase-like (A)	ko00561: Glycerolipid metabolism	caffeoylshikimate esterase-like [Chenopodium quinoa]	RecName: Full=Caffeoylshikimate esterase; EC=3.1.1.-; AltName: Full=Lysophospholipase 2; Short=LysoPL2;	SubName: Full=Uncharacterized protein {ECO:0000313|EMBL:KNA25261.1};	Lysophospholipase	GO:0005783,endoplasmic reticulum; GO:0005794,Golgi apparatus; GO:0005886,plasma membrane; GO:0009506,plasmodesma; GO:0003846,2-acylglycerol O-acyltransferase activity; GO:0090430,caffeoyl-CoA: alcohol caffeoyl transferase activity; GO:0016787,hydrolase activity; GO:0004622,lysophospholipase activity; GO:0009809,lignin biosynthetic process; GO:0006629,lipid metabolic process; GO:0046686,response t…	PF12146.8:Serine aminopeptidase, S33
gene-LOC110720420	1.1	1.45	0.95	1.25	7.5	14.59	46	57	33	33	294	540	2.74957	0.000569446	0.0348974	up	NW_018742204.1	16931841	16938633	-	LOC110720420	--	--	--	hippocampus abundant transcript-like protein 1 [Chenopodium quinoa]	--	SubName: Full=Uncharacterized protein {ECO:0000313|EMBL:KNA16328.1};	Predicted transporter ADD1 (major facilitator superfamily)	GO:0016021,integral component of membrane; GO:0005215,transporter activity; GO:0055085,transmembrane transport	PF07690.16:Major Facilitator Superfamily
gene-LOC110720450	0.62	0.37	0.95	2.3	8.2	9.73	27	15	34	63	333	373	3.38955	1.74661e-06	0.000558049	up	NW_018742556.1	1519592	1524058	+	LOC110720450	--	K15404 aldehyde decarbonylase [EC:4.1.99.5] | (RefSeq) protein ECERIFERUM 1-like (A)	ko00073: Cutin, suberine and wax biosynthesis	protein ECERIFERUM 1-like [Chenopodium quinoa]	RecName: Full=Protein ECERIFERUM 1;	SubName: Full=Uncharacterized protein {ECO:0000313|EMBL:KNA09075.1};	--	GO:0005789,endoplasmic reticulum membrane; GO:0016021,integral component of membrane; GO:0005506,iron ion binding; GO:0016491,oxidoreductase activity; GO:0043447,alkane biosynthetic process; GO:0042742,defense response to bacterium; GO:0050832,defense response to fungus; GO:0008610,lipid biosynthetic process; GO:0006629,lipid metabolic process; GO:0009414,response to water deprivation; GO:0010025…	PF12076.8:WAX2 C-terminal domain
gene-LOC110720452	4.27	6.19	10.98	11.46	41.05	72.25	189	258	403	321	1707	2836	2.53979	9.75146e-05	0.0105217	up	NW_018742556.1	1537995	1542696	+	LOC110720452	--	K15404 aldehyde decarbonylase [EC:4.1.99.5] | (RefSeq) protein ECERIFERUM 1-like (A)	ko00073: Cutin, suberine and wax biosynthesis	protein ECERIFERUM 1-like [Chenopodium quinoa]	RecName: Full=Protein ECERIFERUM 1;	SubName: Full=Uncharacterized protein {ECO:0000313|EMBL:KNA21538.1};	--	GO:0005789,endoplasmic reticulum membrane; GO:0016021,integral component of membrane; GO:0005506,iron ion binding; GO:0016491,oxidoreductase activity; GO:0043447,alkane biosynthetic process; GO:0042742,defense response to bacterium; GO:0050832,defense response to fungus; GO:0008610,lipid biosynthetic process; GO:0006629,lipid metabolic process; GO:0009414,response to water deprivation; GO:0010025…	PF12076.8:WAX2 C-terminal domain
gene-LOC110720561	1.9	3.57	4.36	7.27	8.48	12.9	69	122	131	167	289	415	1.61889	0.000672477	0.0381407	up	NW_018742558.1	40084	44271	+	LOC110720561	--	--	--	thaumatin-like protein 1b [Chenopodium quinoa]	RecName: Full=Thaumatin-like protein 1 {ECO:0000303|PubMed:15988566}; Short=AtTLP1 {ECO:0000303|PubMed:15988566}; Flags: Precursor;	SubName: Full=Uncharacterized protein {ECO:0000313|EMBL:KNA08239.1};	--	GO:0009682,induced systemic resistance; GO:0009617,response to bacterium; GO:0009723,response to ethylene	PF00314.17:Thaumatin family
gene-LOC110720578	0.57	1.29	0.49	3.49	3.06	3.76	53	113	38	205	267	310	2.27285	3.87177e-06	0.00101933	up	NW_018742558.1	996422	1003166	+	LOC110720578	--	K05658 ATP-binding cassette, subfamily B (MDR/TAP), member 1 [EC:7.6.2.2] | (RefSeq) ABC transporter B family member 13-like (A)	ko02010: ABC transporters	ABC transporter B family member 13-like [Chenopodium quinoa]	RecName: Full=ABC transporter B family member 13; Short=ABC transporter ABCB.13; Short=AtABCB13; AltName: Full=P-glycoprotein 13; AltName: Full=Putative multidrug resistance protein 15;	SubName: Full=Uncharacterized protein {ECO:0000313|EMBL:KMS99775.1};	Multidrug/pheromone exporter, ABC superfamily	GO:0016021,integral component of membrane; GO:0005524,ATP binding; GO:0042626,ATPase activity, coupled to transmembrane movement of substances	PF00664.23:ABC transporter transmembrane region
gene-LOC110720757	13.45	13.69	13.5	5.35	3.86	4.44	222	213	185	56	60	65	-1.46551	0.000626951	0.0367656	down	NW_018742577.1	2368539	2370393	-	LOC110720757	--	--	--	CASP-like protein 2D1 [Chenopodium quinoa]	RecName: Full=CASP-like protein 2D1; Short=PtCASPL2D1;	RecName: Full=CASP-like protein {ECO:0000256|RuleBase:RU361233};	--	GO:0016021,integral component of membrane; GO:0005886,plasma membrane; GO:0051536,iron-sulfur cluster binding	PF04535.12:Domain of unknown function (DUF588)
gene-LOC110720877	5.44	3.71	6.39	11.17	22.57	18.13	193	124	188	251	753	571	1.79654	5.58535e-05	0.00753313	up	NW_018742204.1	18226739	18228483	-	LOC110720877	--	K23260 scopoletin glucosyltransferase [EC:2.4.1.128] | (RefSeq) scopoletin glucosyltransferase-like (A)	ko00940: Phenylpropanoid biosynthesis	scopoletin glucosyltransferase-like [Chenopodium quinoa]	RecName: Full=Scopoletin glucosyltransferase; EC=2.4.1.128; AltName: Full=Phenylpropanoid:glucosyltransferase 1;	SubName: Full=Uncharacterized protein {ECO:0000313|EMBL:KNA05928.1};	UDP-glucuronosyl and UDP-glucosyl transferase	GO:0042802,identical protein binding; GO:0050275,scopoletin glucosyltransferase activity; GO:0008152,metabolic process	PF00201.18:UDP-glucoronosyl and UDP-glucosyl transferase
gene-LOC110720959	1.27	1.81	1.22	2.29	3.95	4.99	78	105	62	89	228	272	1.46476	0.000754495	0.0412453	up	NW_018742577.1	2676777	2680849	+	LOC110720959	--	--	--	uncharacterized protein LOC110720959 isoform X1 [Chenopodium quinoa]	RecName: Full=Uncharacterized protein At5g41620;	SubName: Full=Uncharacterized protein {ECO:0000313|EMBL:KNA25229.1}; Flags: Fragment;	--	GO:0009507,chloroplast; GO:0005886,plasma membrane	PF05837.12:Centromere protein H (CENP-H)
gene-LOC110720968	31.84	24.73	31.67	3.65	9.11	5.08	784	574	647	57	211	111	-2.22968	1.48744e-06	0.000484654	down	NW_018742577.1	2778655	2781358	-	LOC110720968	--	K08081 tropinone reductase I [EC:1.1.1.206] | (RefSeq) tropinone reductase homolog At5g06060-like (A)	ko00960: Tropane, piperidine and pyridine alkaloid biosynthesis	tropinone reductase homolog At5g06060-like [Chenopodium quinoa]	RecName: Full=Tropinone reductase homolog At5g06060 {ECO:0000305}; EC=1.1.1.- {ECO:0000305};	SubName: Full=Uncharacterized protein {ECO:0000313|EMBL:KCW52638.1};	Reductases with broad range of substrate specificities	GO:0005829,cytosol; GO:0016491,oxidoreductase activity	PF13561.6:Enoyl-(Acyl carrier protein) reductase
gene-LOC110721028	0.27	0.31	0.15	1.8	2.82	3.85	13	14	6	55	128	165	3.61511	6.79944e-09	5.45763e-06	up	NW_018742577.1	3782760	3788254	-	LOC110721028	--	K01051 pectinesterase [EC:3.1.1.11] | (RefSeq) pectinesterase-like (A)	ko00040: Pentose and glucuronate interconversions	pectinesterase-like [Chenopodium quinoa]	RecName: Full=Pectinesterase 2.1; Short=PE 2.1; EC=3.1.1.11; AltName: Full=Pectin methylesterase 2.1; Flags: Precursor;	RecName: Full=Pectinesterase {ECO:0000256|RuleBase:RU000589}; EC=3.1.1.11 {ECO:0000256|RuleBase:RU000589};	--	GO:0071944,cell periphery; GO:0005618,cell wall; GO:0005576,extracellular region; GO:0045330,aspartyl esterase activity; GO:0030599,pectinesterase activity; GO:0046910,pectinesterase inhibitor activity; GO:0042545,cell wall modification; GO:0009835,fruit ripening; GO:0045490,pectin catabolic process	PF01095.19:Pectinesterase
gene-LOC110721181	12.02	16.16	24.97	2.68	4.43	4.65	623	790	1074	88	216	214	-2.11082	1.0215e-06	0.00036147	down	NW_018742598.1	1037754	1052107	+	LOC110721181	--	K13863 solute carrier family 7 (cationic amino acid transporter), member 1 | (RefSeq) cationic amino acid transporter 3, mitochondrial-like isoform X1 (A)	--	cationic amino acid transporter 3, mitochondrial-like isoform X1 [Chenopodium quinoa]	RecName: Full=Cationic amino acid transporter 2, vacuolar;	SubName: Full=Uncharacterized protein {ECO:0000313|EMBL:KNA10215.1};	Amino acid transporters	GO:0016021,integral component of membrane; GO:0009705,plant-type vacuole membrane; GO:0005774,vacuolar membrane; GO:0005773,vacuole; GO:0015171,amino acid transmembrane transporter activity; GO:0080144,amino acid homeostasis	PF13520.6:Amino acid permease
gene-LOC110721509	33.56	50.8	96.25	14.98	8.87	13.64	909	1297	2163	257	226	328	-2.17163	3.50305e-05	0.0055424	down	NW_018742616.1	1225072	1238791	-	LOC110721509	--	--	--	uncharacterized protein LOC110721509 [Chenopodium quinoa]	--	SubName: Full=Uncharacterized protein {ECO:0000313|EMBL:KNA05907.1};	Predicted phosphoglycerate mutase	--	PF00300.22:Histidine phosphatase superfamily (branch 1)
gene-LOC110721549	6.23	6.74	4.63	9.31	26.49	16.67	303	309	187	287	1212	720	1.66125	0.000207176	0.0174438	up	NW_018742616.1	1785391	1788780	+	LOC110721549	--	K17710 pentatricopeptide repeat domain-containing protein 1 | (RefSeq) pentatricopeptide repeat-containing protein At2g18940, chloroplastic-like (A)	--	pentatricopeptide repeat-containing protein At1g02150-like [Chenopodium quinoa]	RecName: Full=Pentatricopeptide repeat-containing protein At1g02150;	SubName: Full=Uncharacterized protein {ECO:0000313|EMBL:KNA14339.1};	FOG: PPR repeat	GO:0009507,chloroplast; GO:0043231,intracellular membrane-bounded organelle; GO:0004519,endonuclease activity; GO:0003729,mRNA binding; GO:0003723,RNA binding; GO:0009451,RNA modification	PF01535.20:PPR repeat
gene-LOC110721850	0.59	0.45	0	3.18	3.9	7.28	25	18	0	85	155	273	3.85533	0.000375227	0.026786	up	NW_018742630.1	2541123	2546841	-	LOC110721850	--	K01051 pectinesterase [EC:3.1.1.11] | (RefSeq) pectinesterase/pectinesterase inhibitor PPE8B-like (A)	ko00040: Pentose and glucuronate interconversions	pectinesterase/pectinesterase inhibitor PPE8B-like [Chenopodium quinoa]	RecName: Full=Pectinesterase/pectinesterase inhibitor PPE8B; Includes: RecName: Full=Pectinesterase inhibitor PPE8B; AltName: Full=Pectin methylesterase inhibitor PPE8B; Includes: RecName: Full=Pectinesterase PPE8B; Short=PE PPE8B; EC=3.1.1.11; AltName: Full=Pectin methylesterase PPE8B; Flags: Precursor;	RecName: Full=Pectinesterase {ECO:0000256|RuleBase:RU000589}; EC=3.1.1.11 {ECO:0000256|RuleBase:RU000589};	--	GO:0005618,cell wall; GO:0005576,extracellular region; GO:0045330,aspartyl esterase activity; GO:0004857,enzyme inhibitor activity; GO:0030599,pectinesterase activity; GO:0042545,cell wall modification; GO:0050829,defense response to Gram-negative bacterium; GO:0045490,pectin catabolic process	PF01095.19:Pectinesterase
gene-LOC110721907	34.79	6.09	60.26	2.47	2.11	3.05	1581	261	2272	71	90	123	-3.70084	1.27966e-06	0.000429716	down	NW_018742630.1	3426193	3430566	+	LOC110721907	--	K01637 isocitrate lyase [EC:4.1.3.1] | (RefSeq) isocitrate lyase-like isoform X1 (A)	ko00630: Glyoxylate and dicarboxylate metabolism; ko01200: Carbon metabolism	isocitrate lyase-like isoform X1 [Chenopodium quinoa]	RecName: Full=Isocitrate lyase {ECO:0000250|UniProtKB:P28297}; Short=ICL {ECO:0000250|UniProtKB:P28297}; EC=4.1.3.1 {ECO:0000250|UniProtKB:P28297}; AltName: Full=Isocitrase {ECO:0000250|UniProtKB:P28297}; AltName: Full=Isocitratsysase {ECO:0000250|UniProtKB:P28297};	RecName: Full=Isocitrate lyase {ECO:0000256|PIRNR:PIRNR001362};	Isocitrate lyase	GO:0009514,glyoxysome; GO:0004451,isocitrate lyase activity; GO:0046872,metal ion binding; GO:0006097,glyoxylate cycle; GO:0006099,tricarboxylic acid cycle	PF00463.21:Isocitrate lyase family
gene-LOC110721922	19.35	25.45	18.51	42.1	49.51	41.52	722	895	573	995	1737	1375	1.19058	3.77032e-06	0.00100062	up	NW_018742630.1	3663322	3665156	-	LOC110721922	--	K08679 UDP-glucuronate 4-epimerase [EC:5.1.3.6] | (RefSeq) UDP-glucuronate 4-epimerase 1 (A)	ko00520: Amino sugar and nucleotide sugar metabolism	UDP-glucuronate 4-epimerase 1 [Chenopodium quinoa]	RecName: Full=UDP-glucuronate 4-epimerase 1; EC=5.1.3.6; AltName: Full=UDP-glucuronic acid epimerase 1; Short=AtUGlcAE3;	SubName: Full=Uncharacterized protein {ECO:0000313|EMBL:KNA07801.1};	UDP-glucose 4-epimerase/UDP-sulfoquinovose synthase	GO:0005768,endosome; GO:0005794,Golgi apparatus; GO:0032580,Golgi cisterna membrane; GO:0016021,integral component of membrane; GO:0005802,trans-Golgi network; GO:0050378,UDP-glucuronate 4-epimerase activity; GO:0050832,defense response to fungus; GO:0050829,defense response to Gram-negative bacterium; GO:0033481,galacturonate biosynthetic process	PF16363.5:GDP-mannose 4,6 dehydratase
gene-LOC110721932	13.73	36.58	20.41	37.49	78.64	107.04	749	1882	924	1296	4036	5185	1.74322	0.000161797	0.0147088	up	NW_018742630.1	3809154	3816286	+	LOC110721932	--	K15404 aldehyde decarbonylase [EC:4.1.99.5] | (RefSeq) protein ECERIFERUM 1-like (A)	ko00073: Cutin, suberine and wax biosynthesis	protein ECERIFERUM 3-like [Chenopodium quinoa]	RecName: Full=Protein ECERIFERUM 3; AltName: Full=Protein FACELESS POLLEN 1; AltName: Full=Protein WAX2; AltName: Full=Protein YORE-YORE;	SubName: Full=Uncharacterized protein {ECO:0000313|EMBL:KNA10431.1};	--	GO:0005789,endoplasmic reticulum membrane; GO:0016021,integral component of membrane; GO:0016020,membrane; GO:0005886,plasma membrane; GO:0005506,iron ion binding; GO:0016491,oxidoreductase activity; GO:0043447,alkane biosynthetic process; GO:0042335,cuticle development; GO:0006723,cuticle hydrocarbon biosynthetic process; GO:0008610,lipid biosynthetic process; GO:0006629,lipid metabolic process;…	PF12076.8:WAX2 C-terminal domain
gene-LOC110722149	0.98	1.04	0	5.96	7.77	10.09	31	31	0	119	230	282	3.66563	0.000715298	0.0397631	up	NW_018742651.1	4371085	4372633	+	LOC110722149	--	--	--	basic 7S globulin-like [Chenopodium quinoa]	RecName: Full=Basic 7S globulin; AltName: Full=SBg7S; Short=Bg; Contains: RecName: Full=Basic 7S globulin high kDa subunit; Contains: RecName: Full=Basic 7S globulin low kDa subunit; Flags: Precursor;	SubName: Full=Uncharacterized protein {ECO:0000313|EMBL:KNA22755.1};	Aspartyl protease	GO:0004190,aspartic-type endopeptidase activity; GO:0042802,identical protein binding; GO:0045735,nutrient reservoir activity; GO:0030163,protein catabolic process; GO:0006508,proteolysis	PF14541.6:Xylanase inhibitor C-terminal
gene-LOC110722287	5.64	6.21	7.76	0	0.54	1.07	77	80	88	0	7	13	-3.56915	0.000633701	0.0369106	down	NW_018742669.1	142901	145315	+	LOC110722287	--	--	--	--	--	--	--	--	--
gene-LOC110722303	45	61.95	34.91	88.36	85.5	109.98	1518	1970	977	1888	2712	3293	1.11501	3.77355e-05	0.00583022	up	NW_018742669.1	163213	165093	-	LOC110722303	--	K14497 protein phosphatase 2C [EC:3.1.3.16] | (RefSeq) protein phosphatase 2C 37-like (A)	ko04016: MAPK signaling pathway - plant; ko04075: Plant hormone signal transduction	protein phosphatase 2C 37-like [Chenopodium quinoa]	RecName: Full=Protein phosphatase 2C 37; Short=AtPP2C37; EC=3.1.3.16; AltName: Full=Protein ABA-HYPERSENSITIVE GERMINATION 3; AltName: Full=Protein phosphatase 2C A; Short=PP2CA;	SubName: Full=Protein phosphatase 2C {ECO:0000313|EMBL:CAC84141.2}; SubName: Full=protein phosphatase 2C 37-like {ECO:0000313|RefSeq:XP_016482340.1};	Serine/threonine protein phosphatase	GO:0005829,cytosol; GO:0005634,nucleus; GO:0046872,metal ion binding; GO:0004721,phosphoprotein phosphatase activity; GO:0019901,protein kinase binding; GO:0004722,protein serine/threonine phosphatase activity; GO:0009738,abscisic acid-activated signaling pathway; GO:0009788,negative regulation of abscisic acid-activated signaling pathway; GO:0010360,negative regulation of anion channel activity;…	PF00481.21:Protein phosphatase 2C
gene-LOC110722371	3.67	0.74	5.98	0	0	0	37	7	50	0	0	0	-7.22284	0.000537544	0.0336953	down	NW_018742681.1	3655028	3655757	+	LOC110722371	--	--	--	--	--	--	--	--	--
gene-LOC110722566	17.34	20.56	19.04	3.98	1.47	1.74	213	238	194	31	17	19	-2.84536	6.42233e-06	0.00147799	down	NW_018742684.1	1375898	1376913	-	LOC110722566	--	--	--	uncharacterized protein LOC110722566 [Chenopodium quinoa]	--	SubName: Full=Suaeda glauca salt-induced hydrophilic protein mRNA {ECO:0000313|EMBL:AJK93573.1};	--	--	--
gene-LOC110722645	5.14	8.23	6.58	11.79	20.13	42.62	179	270	190	260	659	1317	1.94807	6.27632e-05	0.00803686	up	NW_018742684.1	1117942	1121058	+	LOC110722645	--	K01792 glucose-6-phosphate 1-epimerase [EC:5.1.3.15] | (RefSeq) putative glucose-6-phosphate 1-epimerase (A)	ko00010: Glycolysis / Gluconeogenesis	putative glucose-6-phosphate 1-epimerase [Chenopodium quinoa]	RecName: Full=Putative glucose-6-phosphate 1-epimerase {ECO:0000250|UniProtKB:Q03161}; EC=5.1.3.15 {ECO:0000250|UniProtKB:Q03161}; AltName: Full=Putative D-hexose-6-phosphate mutarotase {ECO:0000250|UniProtKB:Q03161}; AltName: Full=Putative apospory-associated protein C;	RecName: Full=Glucose-6-phosphate 1-epimerase {ECO:0000256|PIRNR:PIRNR016020}; EC=5.1.3.15 {ECO:0000256|PIRNR:PIRNR016020};	Uncharacterized enzymes related to aldose 1-epimerase	GO:0030246,carbohydrate binding; GO:0047938,glucose-6-phosphate 1-epimerase activity; GO:0005975,carbohydrate metabolic process	PF01263.20:Aldose 1-epimerase
gene-LOC110722718	9.36	28.13	17.84	36.53	48.64	61.67	313	887	495	774	1530	1831	1.51793	0.000393395	0.0276397	up	NW_018742684.1	1847835	1850725	-	LOC110722718	--	--	--	B2 protein-like [Chenopodium quinoa]	RecName: Full=B2 protein;	SubName: Full=Uncharacterized protein {ECO:0000313|EMBL:KNA24030.1};	--	--	PF10539.9:Development and cell death domain
gene-LOC110722721	0.02	0.06	0	0.83	0.74	1.5	1	3	0	30	40	76	5.48045	6.7373e-06	0.00152066	up	NW_018742684.1	1943052	1949131	+	LOC110722721	--	K10999 cellulose synthase A [EC:2.4.1.12] | (RefSeq) cellulose synthase A catalytic subunit 7 [UDP-forming]-like (A)	--	cellulose synthase-like protein G3 isoform X1 [Chenopodium quinoa]	RecName: Full=Cellulose synthase-like protein G3; Short=AtCslG3; EC=2.4.1.-;	SubName: Full=Uncharacterized protein {ECO:0000313|EMBL:KNA13013.1};	--	GO:0005794,Golgi apparatus; GO:0000139,Golgi membrane; GO:0016021,integral component of membrane; GO:0005886,plasma membrane; GO:0016760,cellulose synthase (UDP-forming) activity; GO:0016759,cellulose synthase activity; GO:0071555,cell wall organization; GO:0030244,cellulose biosynthetic process; GO:0009833,plant-type primary cell wall biogenesis	PF03552.14:Cellulose synthase
gene-LOC110722828	1.23	0.82	0.99	4.68	18.08	28.09	27	17	18	65	373	547	4.07059	5.03649e-09	4.17418e-06	up	NW_018742684.1	3169678	3171135	+	LOC110722828	--	K13248 pyridoxal phosphate phosphatase PHOSPHO2 [EC:3.1.3.74] | (RefSeq) inorganic pyrophosphatase 1-like (A)	ko00750: Vitamin B6 metabolism	inorganic pyrophosphatase 1-like [Chenopodium quinoa]	RecName: Full=Inorganic pyrophosphatase 1; Short=AtPPsPase1; Short=PPi phosphatase 1; Short=Pyrophosphate-specific phosphatase 1; EC=3.6.1.1; AltName: Full=Protein PHOSPHATE STARVATION-INDUCED GENE 2; Short=AtPS2;	SubName: Full=Uncharacterized protein {ECO:0000313|EMBL:KNA19685.1};	Predicted haloacid dehalogenase-like hydrolase	GO:0004427,inorganic diphosphatase activity; GO:0046872,metal ion binding; GO:0016791,phosphatase activity; GO:0016462,pyrophosphatase activity; GO:0016036,cellular response to phosphate starvation; GO:0051262,protein tetramerization	PF06888.12:Putative Phosphatase
gene-LOC110722829	0	0.33	0	15.25	13.72	21.63	0	10	0	310	414	616	7.43332	8.30416e-13	1.51823e-09	up	NW_018742684.1	3180228	3182164	+	LOC110722829	--	K13248 pyridoxal phosphate phosphatase PHOSPHO2 [EC:3.1.3.74] | (RefSeq) inorganic pyrophosphatase 1-like (A)	ko00750: Vitamin B6 metabolism	inorganic pyrophosphatase 1-like [Chenopodium quinoa]	RecName: Full=Inorganic pyrophosphatase 1; Short=AtPPsPase1; Short=PPi phosphatase 1; Short=Pyrophosphate-specific phosphatase 1; EC=3.6.1.1; AltName: Full=Protein PHOSPHATE STARVATION-INDUCED GENE 2; Short=AtPS2;	SubName: Full=Uncharacterized protein {ECO:0000313|EMBL:KNA19685.1};	Predicted haloacid dehalogenase-like hydrolase	GO:0004427,inorganic diphosphatase activity; GO:0046872,metal ion binding; GO:0016791,phosphatase activity; GO:0016462,pyrophosphatase activity; GO:0016036,cellular response to phosphate starvation; GO:0051262,protein tetramerization	PF06888.12:Putative Phosphatase
gene-LOC110722984	1.77	0.17	0.42	3.24	17.19	16.54	56	5	11	65	512	465	3.9553	4.64017e-05	0.00663927	up	NW_018742204.1	21121374	21124632	+	LOC110722984	--	K20858 calcium uniporter protein, mitochondrial | (RefSeq) calcium uniporter protein 2, mitochondrial-like isoform X1 (A)	--	calcium uniporter protein 2, mitochondrial-like isoform X1 [Chenopodium quinoa]	RecName: Full=Calcium uniporter protein 2, mitochondrial; Flags: Precursor;	SubName: Full=Uncharacterized protein {ECO:0000313|EMBL:KNA21081.1};	Uncharacterized conserved protein	GO:0016021,integral component of membrane; GO:0005743,mitochondrial inner membrane; GO:0005262,calcium channel activity; GO:0015292,uniporter activity	PF04678.13:Mitochondrial calcium uniporter
gene-LOC110723126	101.18	222.21	282.78	50.6	81.63	74.08	2557	5294	5930	810	1940	1662	-1.47014	0.000870078	0.0447397	down	NW_018742720.1	1557454	1558696	-	LOC110723126	--	K14504 xyloglucan:xyloglucosyl transferase TCH4 [EC:2.4.1.207] | (RefSeq) probable xyloglucan endotransglucosylase/hydrolase protein 23 (A)	ko04075: Plant hormone signal transduction	probable xyloglucan endotransglucosylase/hydrolase protein 23 [Chenopodium quinoa]	RecName: Full=Probable xyloglucan endotransglucosylase/hydrolase protein 23; Short=At-XTH23; Short=XTH-23; EC=2.4.1.207; Flags: Precursor;	RecName: Full=Xyloglucan endotransglucosylase/hydrolase {ECO:0000256|RuleBase:RU361120}; EC=2.4.1.207 {ECO:0000256|RuleBase:RU361120};	--	GO:0048046,apoplast; GO:0005618,cell wall; GO:0005794,Golgi apparatus; GO:0004553,hydrolase activity, hydrolyzing O-glycosyl compounds; GO:0016762,xyloglucan:xyloglucosyl transferase activity; GO:0042546,cell wall biogenesis; GO:0071555,cell wall organization; GO:0010411,xyloglucan metabolic process	PF00722.21:Glycosyl hydrolases family 16
gene-LOC110723134	0.19	0.3	0.42	1.14	1.35	1.49	14	21	26	54	95	99	2.23137	0.000306402	0.0233953	up	NW_018742720.1	1954378	1958745	+	LOC110723134	--	K13457 disease resistance protein RPM1 | (RefSeq) disease resistance protein RPM1-like (A)	ko04626: Plant-pathogen interaction	putative disease resistance RPP13-like protein 1 [Chenopodium quinoa]	RecName: Full=Putative disease resistance RPP13-like protein 1;	SubName: Full=Uncharacterized protein {ECO:0000313|EMBL:KDO74354.1}; Flags: Fragment;	Apoptotic ATPase	GO:0005886,plasma membrane; GO:0043531,ADP binding; GO:0005524,ATP binding; GO:0009626,plant-type hypersensitive response; GO:0007165,signal transduction	PF00931.22:NB-ARC domain
gene-LOC110723137	5.35	6.61	5.71	8.59	43.48	62.6	176	205	156	179	1345	1828	2.72054	1.34662e-05	0.00263784	up	NW_018742720.1	1977270	1983203	+	LOC110723137	--	--	--	uncharacterized protein LOC110723137 [Chenopodium quinoa]	--	SubName: Full=Uncharacterized protein {ECO:0000313|EMBL:KNA04294.1};	--	--	PF04862.12:Protein of unknown function (DUF642)
gene-LOC110723276	3.32	5.04	5.21	7.39	14.15	20.08	102	146	133	144	409	548	1.67391	0.000256904	0.0203722	up	NW_018742726.1	2093740	2096697	+	LOC110723276	--	--	--	transmembrane protein 136-like [Chenopodium quinoa]	--	SubName: Full=Uncharacterized protein {ECO:0000313|EMBL:KNA13172.1}; Flags: Fragment;	Uncharacterized conserved protein	GO:0016021,integral component of membrane	PF03798.16:TLC domain
gene-LOC110723277	2.68	2.77	2.02	5.77	4.97	6.34	118	115	74	161	206	248	1.29806	0.00047202	0.0310674	up	NW_018742726.1	2107983	2114689	-	LOC110723277	--	K03843 alpha-1,3/alpha-1,6-mannosyltransferase [EC:2.4.1.132 2.4.1.257] | (RefSeq) alpha-1,3/1,6-mannosyltransferase ALG2-like (A)	ko00510: N-Glycan biosynthesis; ko00513: Various types of N-glycan biosynthesis	uncharacterized protein LOC110723277 [Chenopodium quinoa]	--	SubName: Full=Uncharacterized protein {ECO:0000313|EMBL:KNA13173.1};	Glycosyltransferase	GO:0016021,integral component of membrane	PF16994.5:Glycosyl-transferase family 4
gene-LOC110723291	2.11	5.2	2.35	11.29	9.11	9.85	180	417	166	609	729	744	1.80388	3.63666e-05	0.00567199	up	NW_018742726.1	2232783	2240480	-	LOC110723291	--	--	--	--	--	--	--	--	--
gene-LOC110723306	0.09	0.03	0	5.99	7.83	15.89	3	1	0	130	252	483	7.94913	9.95295e-17	4.09427e-13	up	NW_018742726.1	2421482	2425034	-	LOC110723306	--	K22390 acid phosphatase type 7 | (RefSeq) purple acid phosphatase 2-like (A)	--	purple acid phosphatase 2-like [Chenopodium quinoa]	RecName: Full=Purple acid phosphatase 2; EC=3.1.3.2; AltName: Full=Manganese(II) purple acid phosphatase 2; Flags: Precursor;	RecName: Full=Purple acid phosphatase {ECO:0000256|RuleBase:RU361203}; EC=3.1.3.2 {ECO:0000256|RuleBase:RU361203};	Purple acid phosphatase	GO:0005576,extracellular region; GO:0003993,acid phosphatase activity; GO:0046872,metal ion binding	PF00149.28:Calcineurin-like phosphoesterase
gene-LOC110723353	0.07	0.1	0	0.71	1.26	0.51	5	7	0	33	87	33	4.01841	0.000662011	0.0379591	up	NW_018742726.1	2020048	2023769	-	LOC110723353	--	K13457 disease resistance protein RPM1 | (RefSeq) disease resistance protein RPM1-like (A)	ko04626: Plant-pathogen interaction	putative disease resistance protein RGA4 [Chenopodium quinoa]	RecName: Full=Putative disease resistance protein RGA4; AltName: Full=RGA4-blb;	SubName: Full=Uncharacterized protein {ECO:0000313|EMBL:KNA19101.1};	Apoptotic ATPase	GO:0043531,ADP binding; GO:0005524,ATP binding; GO:0006952,defense response	PF00931.22:NB-ARC domain
gene-LOC110723420	24.14	34.65	68.57	10.81	10.03	16.61	804	1088	1895	228	314	491	-1.7061	0.000662085	0.0379591	down	NW_018742204.1	21696880	21700000	+	LOC110723420	--	K07904 Ras-related protein Rab-11A | (RefSeq) ras-related protein Rab11D (A)	ko04144: Endocytosis	ras-related protein Rab11D [Chenopodium quinoa]	RecName: Full=Ras-related protein Rab11D;	SubName: Full=Uncharacterized protein {ECO:0000313|EMBL:KNA12126.1};	GTPase Rab11/YPT3, small G protein superfamily	GO:0005886,plasma membrane; GO:0005525,GTP binding; GO:0003924,GTPase activity	PF00071.22:Ras family
gene-LOC110723485	851.26	825.54	846.09	431.23	229.5	256.26	14400	13165	11876	4621	3651	3848	-1.3204	0.000975223	0.0486404	down	NW_018742204.1	21773136	21774822	-	LOC110723485	--	K11253 histone H3 | (RefSeq) histone H3.3 (A)	--	hypothetical protein PHYPA_023132 [Physcomitrella patens]	RecName: Full=Histone H3.3;	RecName: Full=Histone H3 {ECO:0000256|RuleBase:RU004471};	Histones H3 and H4	GO:0000786,nucleosome; GO:0005634,nucleus; GO:0003677,DNA binding; GO:0046982,protein heterodimerization activity	PF00125.24:Core histone H2A/H2B/H3/H4
gene-LOC110723517	0	0.15	0	3.11	1.23	0.99	0	4	0	56	33	25	5.42281	0.000657478	0.0378269	up	NW_018742733.1	1780368	1781976	-	LOC110723517	--	K17604 zinc finger SWIM domain-containing protein 3 | (RefSeq) protein FAR1-RELATED SEQUENCE 8-like (A)	--	protein FAR1-RELATED SEQUENCE 5-like [Chenopodium quinoa]	RecName: Full=Protein FAR1-RELATED SEQUENCE 5;	SubName: Full=FAR1; Zinc finger, SWIM-type {ECO:0000313|EMBL:ABN05718.1};	--	GO:0005634,nucleus; GO:0008270,zinc ion binding; GO:0006355,regulation of transcription, DNA-templated	PF10551.9:MULE transposase domain
gene-LOC110723750	216.07	266.02	140.61	176.9	1014.23	1229.22	6928	8041	3741	3593	30582	34986	1.99997	0.000988998	0.0488928	up	NW_018742733.1	1276854	1279814	-	LOC110723750	--	K03146 cysteine-dependent adenosine diphosphate thiazole synthase [EC:2.4.2.60] | (RefSeq) thiamine thiazole synthase, chloroplastic-like (A)	ko00730: Thiamine metabolism	thiamine thiazole synthase, chloroplastic-like [Chenopodium quinoa]	RecName: Full=Thiamine thiazole synthase 2, chloroplastic {ECO:0000255|HAMAP-Rule:MF_03158}; AltName: Full=Thiazole biosynthetic enzyme 2 {ECO:0000255|HAMAP-Rule:MF_03158}; Flags: Precursor;	RecName: Full=Thiamine thiazole synthase, chloroplastic {ECO:0000256|HAMAP-Rule:MF_03158}; AltName: Full=Thiazole biosynthetic enzyme {ECO:0000256|HAMAP-Rule:MF_03158};	Protein involved in thiamine biosynthesis and DNA damage tolerance	GO:0009507,chloroplast; GO:0005829,cytosol; GO:0005506,iron ion binding; GO:0006950,response to stress; GO:0009228,thiamine biosynthetic process; GO:0052837,thiazole biosynthetic process	PF01946.17:Thi4 family
gene-LOC110723814	57.17	56.96	73.9	27.48	32.17	26.23	2026	1903	2173	617	1072	825	-1.03336	0.000785321	0.042478	down	NW_018742733.1	2354495	2356238	-	LOC110723814	--	K20417 palmitoyl-[glycerolipid] 3-(E)-desaturase [EC:1.14.19.43] | (RefSeq) LOW QUALITY PROTEIN: fatty acid desaturase 4, chloroplastic-like (A)	--	LOW QUALITY PROTEIN: fatty acid desaturase 4, chloroplastic-like [Chenopodium quinoa]	RecName: Full=Fatty acid desaturase 4, chloroplastic {ECO:0000303|PubMed:19682287}; EC=1.14.19.43 {ECO:0000269|PubMed:19682287}; AltName: Full=Fatty acid desaturase A {ECO:0000303|PubMed:17796728}; Flags: Precursor;	SubName: Full=Uncharacterized protein {ECO:0000313|EMBL:KNA25009.1};	Ubiquitin-conjugating enzyme	GO:0009507,chloroplast; GO:0031969,chloroplast membrane; GO:0005783,endoplasmic reticulum; GO:0016021,integral component of membrane; GO:0052637,delta 3-trans-hexadecenoic acid phosphatidylglycerol desaturase activity; GO:0061630,ubiquitin protein ligase activity; GO:0031625,ubiquitin protein ligase binding; GO:0046471,phosphatidylglycerol metabolic process; GO:0000209,protein polyubiquitination;…	PF10520.9:B domain of TMEM189, localisation domain
gene-LOC110724043	0.3	0.48	0.25	1.35	1.4	1.67	16	24	11	45	69	78	2.19956	0.000377096	0.0268612	up	NW_018742204.1	22597225	22601195	-	LOC110724043	--	K17710 pentatricopeptide repeat domain-containing protein 1 | (RefSeq) LOW QUALITY PROTEIN: putative pentatricopeptide repeat-containing protein At2g02150 (A)	--	pentatricopeptide repeat-containing protein At2g06000-like [Chenopodium quinoa]	RecName: Full=Pentatricopeptide repeat-containing protein At2g06000;	SubName: Full=Uncharacterized protein {ECO:0000313|EMBL:KNA25796.1};	FOG: PPR repeat	GO:0043231,intracellular membrane-bounded organelle; GO:0004519,endonuclease activity; GO:0003723,RNA binding; GO:0009451,RNA modification	PF12854.7:PPR repeat
gene-LOC110724401	963.29	1121.66	1628.95	367.4	397.37	543.23	11105	12190	15582	2683	4308	5559	-1.43445	1.06555e-05	0.00221938	down	NW_018742763.1	1481726	1487236	-	LOC110724401	--	--	--	peamaclein-like [Chenopodium quinoa]	RecName: Full=Snakin-1; Flags: Precursor;	SubName: Full=Uncharacterized protein {ECO:0000313|EMBL:KZN00090.1};	--	GO:0005618,cell wall; GO:0005576,extracellular region; GO:0006952,defense response	PF02704.14:Gibberellin regulated protein
gene-LOC110724509	3.4	5.8	3.71	10.04	8.49	9.6	507	816	460	950	1192	1272	1.2564	5.31708e-05	0.00723057	up	NW_018742770.1	3358737	3371655	+	LOC110724509	--	K23541 Ca2+/H+ antiporter, TMEM165/GDT1 family | (RefSeq) pentatricopeptide repeat-containing protein At4g21065-like (A)	--	uncharacterized protein LOC110724509 [Chenopodium quinoa]	RecName: Full=Pentatricopeptide repeat-containing protein At1g19720; AltName: Full=Protein DYW7;	SubName: Full=Mannose-binding lectin {ECO:0000313|EMBL:OMO87498.1};	FOG: PPR repeat	GO:0009507,chloroplast; GO:0005737,cytoplasm; GO:0043231,intracellular membrane-bounded organelle; GO:0005634,nucleus; GO:0004519,endonuclease activity; GO:0003723,RNA binding; GO:0008270,zinc ion binding; GO:0009451,RNA modification	PF01419.17:Jacalin-like lectin domain
gene-LOC110724618	19.55	16.73	11.81	19.98	50.96	61.08	854	689	428	553	2094	2369	1.50695	0.000650717	0.0376352	up	NW_018742770.1	1794902	1799915	-	LOC110724618	--	K13600 chlorophyllide a oxygenase [EC:1.14.13.122] | (RefSeq) chlorophyllide a oxygenase, chloroplastic-like (A)	ko00860: Porphyrin and chlorophyll metabolism	chlorophyllide a oxygenase, chloroplastic-like [Chenopodium quinoa]	RecName: Full=Chlorophyllide a oxygenase, chloroplastic; Short=Chlorophyll a oxygenase; EC=1.14.13.122; AltName: Full=Chlorophyll b synthase; Short=AtCAO; Flags: Precursor;	SubName: Full=Uncharacterized protein {ECO:0000313|EMBL:KNA24515.1};	--	GO:0009507,chloroplast; GO:0009706,chloroplast inner membrane; GO:0009535,chloroplast thylakoid membrane; GO:0042651,thylakoid membrane; GO:0051537,2 iron, 2 sulfur cluster binding; GO:0010277,chlorophyllide a oxygenase [overall] activity; GO:0005506,iron ion binding; GO:0016705,oxidoreductase activity, acting on paired donors, with incorporation or reduction of molecular oxygen; GO:0015995,chlor…	PF00355.26:Rieske [2Fe-2S] domain
gene-LOC110724657	43.87	76.13	66.4	79.54	152.75	158.27	876	1433	1100	1006	2868	2805	1.14739	0.000967211	0.0484474	up	NW_018742770.1	2246840	2247821	-	LOC110724657	--	K13448 calcium-binding protein CML | (RefSeq) calcium-binding allergen Ole e 8-like (A)	ko04626: Plant-pathogen interaction	calcium-binding allergen Ole e 8-like [Chenopodium quinoa]	RecName: Full=Calcium-binding allergen Ole e 8; AltName: Full=PCA18/PCA23; AltName: Allergen=Ole e 8;	SubName: Full=Uncharacterized protein {ECO:0000313|EMBL:KNA10488.1};	Calmodulin and related proteins (EF-Hand superfamily)	GO:0005509,calcium ion binding	PF00036.32:EF hand
gene-LOC110724779	1.71	2.88	3.78	0	0.33	0.31	44	70	81	0	8	7	-3.64651	0.000814416	0.0434065	down	NW_018742770.1	3680296	3681968	-	LOC110724779	--	--	--	--	--	--	--	--	--
gene-LOC110724912	9.37	9.63	6.42	2.18	1.21	2.06	190	184	108	28	23	37	-2.116	8.3201e-05	0.00955383	down	NW_018742784.1	12429	23477	-	LOC110724912	--	--	--	--	--	--	--	--	--
gene-LOC110724947	9.79	11.66	10.73	3.17	3.33	2.44	122	137	111	25	39	27	-1.73504	0.000639594	0.0371224	down	NW_018742798.1	3550519	3551637	+	LOC110724947	--	--	--	--	--	--	--	--	--
gene-LOC110724987	7.26	9.32	7.39	2.64	3.17	3.72	200	242	169	46	82	91	-1.23495	0.000581092	0.0351178	down	NW_018742798.1	4365179	4368106	+	LOC110724987	--	--	--	uncharacterized protein LOC110724987 [Chenopodium quinoa]	--	SubName: Full=Uncharacterized protein {ECO:0000313|EMBL:KNA25195.1};	Predicted PhzC/PhzF-type epimerase	GO:0003824,catalytic activity; GO:0009058,biosynthetic process	PF02567.16:Phenazine biosynthesis-like protein
gene-LOC110724999	2.31	9.11	4.2	45.6	65.7	88.83	80	298	121	1002	2143	2735	3.79673	4.39833e-14	1.11342e-10	up	NW_018742204.1	23765406	23768460	-	LOC110724999	--	K18696 glycerophosphodiester phosphodiesterase [EC:3.1.4.46] | (RefSeq) glycerophosphodiester phosphodiesterase GDPD1, chloroplastic-like (A)	ko00564: Glycerophospholipid metabolism	glycerophosphodiester phosphodiesterase GDPD1, chloroplastic-like [Chenopodium quinoa]	RecName: Full=Glycerophosphodiester phosphodiesterase GDPD1, chloroplastic {ECO:0000305}; EC=3.1.4.46 {ECO:0000269|PubMed:21323773}; AltName: Full=Glycerophosphodiester phosphodiesterase 1 {ECO:0000303|PubMed:21323773}; Short=AtGDPD1 {ECO:0000303|PubMed:21323773}; AltName: Full=Protein SENESCENCE-RELATED GENE 3 {ECO:0000303|PubMed:8883383}; Flags: Precursor;	SubName: Full=Uncharacterized protein {ECO:0000313|EMBL:KNA07255.1}; Flags: Fragment;	Predicted starch-binding protein	GO:0009507,chloroplast; GO:0009536,plastid; GO:0008889,glycerophosphodiester phosphodiesterase activity; GO:0000287,magnesium ion binding; GO:0030643,cellular phosphate ion homeostasis; GO:0006071,glycerol metabolic process; GO:0046475,glycerophospholipid catabolic process	PF03009.17:Glycerophosphoryl diester phosphodiesterase family
gene-LOC110725144	1.67	5.82	3.34	8.95	20.16	23.51	83	273	138	282	943	1038	2.37465	1.17334e-05	0.00235448	up	NW_018742810.1	257246	262127	+	LOC110725144	--	--	--	O-acyltransferase WSD1-like [Chenopodium quinoa]	RecName: Full=O-acyltransferase WSD1; AltName: Full=Diacylglycerol O-acyltransferase; Short=DGAT; EC=2.3.1.20; AltName: Full=Long-chain-alcohol O-fatty-acyltransferase; EC=2.3.1.75; AltName: Full=Wax synthase; Short=WS;	SubName: Full=Uncharacterized protein {ECO:0000313|EMBL:KNA25965.1};	--	GO:0005783,endoplasmic reticulum; GO:0005789,endoplasmic reticulum membrane; GO:0016021,integral component of membrane; GO:0005886,plasma membrane; GO:0102966,arachidoyl-CoA:1-dodecanol O-acyltransferase activity; GO:0004144,diacylglycerol O-acyltransferase activity; GO:0047196,long-chain-alcohol O-fatty-acyltransferase activity; GO:0103095,wax ester synthase activity; GO:0019432,triglyceride bio…	PF06974.13:Protein of unknown function (DUF1298)
gene-LOC110725443	0.11	0	0	2.46	6.52	3.64	1	0	0	14	55	29	6.68845	8.36094e-05	0.00955383	up	NW_018742815.1	3873591	3874031	-	LOC110725443	--	--	--	uncharacterized protein LOC110725443 [Chenopodium quinoa]	--	SubName: Full=Uncharacterized protein {ECO:0000313|EMBL:KNA04616.1};	--	GO:0016021,integral component of membrane; GO:0016760,cellulose synthase (UDP-forming) activity; GO:0071555,cell wall organization; GO:0030244,cellulose biosynthetic process	PF10601.9:LITAF-like zinc ribbon domain
gene-LOC110725562	7.56	6.75	3.46	17.08	14.07	24.94	348	293	132	498	609	1019	1.75113	3.66971e-05	0.00569653	up	NW_018742815.1	390397	395771	+	LOC110725562	--	K03715 1,2-diacylglycerol 3-beta-galactosyltransferase [EC:2.4.1.46] | (RefSeq) monogalactosyldiacylglycerol synthase 2, chloroplastic-like isoform X1 (A)	ko00561: Glycerolipid metabolism	monogalactosyldiacylglycerol synthase 2, chloroplastic-like isoform X1 [Chenopodium quinoa]	RecName: Full=Monogalactosyldiacylglycerol synthase 2, chloroplastic; Short=AtMGD2; EC=2.4.1.46; AltName: Full=MGDG synthase type B; Flags: Precursor;	SubName: Full=Uncharacterized protein {ECO:0000313|EMBL:KNA08815.1};	--	GO:0009707,chloroplast outer membrane; GO:0046509,1,2-diacylglycerol 3-beta-galactosyltransferase activity; GO:0035250,UDP-galactosyltransferase activity; GO:0016036,cellular response to phosphate starvation; GO:0006631,fatty acid metabolic process; GO:0019374,galactolipid metabolic process; GO:0009247,glycolipid biosynthetic process	PF06925.11:Monogalactosyldiacylglycerol (MGDG) synthase
gene-LOC110725577	49.8	47.55	63.98	14.81	18.52	22.14	892	803	951	168	312	352	-1.46866	3.108e-06	0.000866789	down	NW_018742815.1	547547	550151	-	LOC110725577	--	K01824 cholestenol Delta-isomerase [EC:5.3.3.5] | (RefSeq) probable 3-beta-hydroxysteroid-Delta(8),Delta(7)-isomerase (A)	ko00100: Steroid biosynthesis	probable 3-beta-hydroxysteroid-Delta(8),Delta(7)-isomerase [Chenopodium quinoa]	RecName: Full=Probable 3-beta-hydroxysteroid-Delta(8),Delta(7)-isomerase; EC=5.3.3.5; AltName: Full=Cholestenol Delta-isomerase; AltName: Full=Delta(8)-Delta(7) sterol isomerase; Short=D8-D7 sterol isomerase;	SubName: Full=Uncharacterized protein {ECO:0000313|EMBL:KNA10556.1};	C-8,7 sterol isomerase	GO:0005789,endoplasmic reticulum membrane; GO:0016021,integral component of membrane; GO:0005886,plasma membrane; GO:0000247,C-8 sterol isomerase activity; GO:0047750,cholestenol delta-isomerase activity; GO:0016126,sterol biosynthetic process	PF05241.12:Emopamil binding protein
gene-LOC110725739	1.36	2.38	1.98	3.47	5.68	5.82	88	145	106	142	345	334	1.48101	0.000177208	0.0157189	up	NW_018742815.1	2668061	2673590	+	LOC110725739	--	--	--	--	--	--	--	--	--
gene-LOC110725782	119.11	211.54	235.36	53.24	59.63	77.43	2974	4979	4876	842	1400	1716	-1.48488	1.4558e-05	0.00280168	down	NW_018742815.1	3543836	3547194	+	LOC110725782	--	K01637 isocitrate lyase [EC:4.1.3.1] | (RefSeq) isocitrate lyase-like (A)	ko00630: Glyoxylate and dicarboxylate metabolism; ko01200: Carbon metabolism	petal death protein-like [Chenopodium quinoa]	RecName: Full=Petal death protein; EC=3.7.1.1; EC=4.1.3.22; AltName: Full=Citramalate lyase; AltName: Full=Oxalacetic hydrolase; AltName: Full=PSR132; Flags: Precursor;	SubName: Full=Uncharacterized protein {ECO:0000313|EMBL:KNA07348.1};	Isocitrate lyase	GO:0047776,citramalate lyase activity; GO:0046872,metal ion binding; GO:0030603,oxaloacetase activity; GO:0016740,transferase activity; GO:0008152,metabolic process	PF13714.6:Phosphoenolpyruvate phosphomutase
gene-LOC110726123	1.04	1.65	8.05	0	0.18	0.13	18	27	116	0	3	2	-5.02943	0.000466154	0.0307428	down	NW_018742861.1	1517331	1518999	-	LOC110726123	--	--	--	uncharacterized protein LOC110726123 [Chenopodium quinoa]	--	SubName: Full=Uncharacterized protein {ECO:0000313|EMBL:KMS97457.1};	--	GO:0016021,integral component of membrane	--
gene-LOC110726345	3.21	3.15	0.67	9.64	15.39	17.31	209	193	36	397	941	999	2.68786	7.69678e-06	0.00169995	up	NW_018742205.1	1869722	1872919	+	LOC110726345	--	K13457 disease resistance protein RPM1 | (RefSeq) disease resistance protein RPM1-like isoform X1 (A)	ko04626: Plant-pathogen interaction	disease resistance protein RGA2-like [Chenopodium quinoa]	RecName: Full=Disease resistance protein RGA2; AltName: Full=Blight resistance protein RPI; AltName: Full=RGA2-blb;	SubName: Full=Uncharacterized protein {ECO:0000313|EMBL:KNA19706.1};	Apoptotic ATPase	GO:0043531,ADP binding; GO:0005524,ATP binding; GO:0006952,defense response	PF00931.22:NB-ARC domain
gene-LOC110726359	56.57	40.75	82.81	19.73	16.3	19.12	620	421	753	137	168	186	-1.62728	0.000327266	0.0243238	down	NW_018742879.1	757539	761785	+	LOC110726359	--	--	--	protein Asterix-like [Chenopodium quinoa]	RecName: Full=Protein Asterix;	SubName: Full=Uncharacterized protein {ECO:0000313|EMBL:KMS96018.1};	Predicted membrane protein	GO:0016021,integral component of membrane	PF03669.13:Uncharacterised protein family (UPF0139)
gene-LOC110726593	0	0	0	3.24	13.48	7.89	0	0	0	43	266	147	9.81914	3.71263e-11	5.31213e-08	up	NW_018742879.1	3911856	3912887	+	LOC110726593	--	--	--	glutathione S-transferase T2-like [Chenopodium quinoa]	RecName: Full=Glutathione S-transferase T2; Short=AtGSTT2; EC=2.5.1.18; AltName: Full=GST class-theta member 2; AltName: Full=Glutathione S-transferase 10B;	SubName: Full=Uncharacterized protein {ECO:0000313|EMBL:KYP64358.1};	--	GO:0005737,cytoplasm; GO:0005777,peroxisome; GO:0004364,glutathione transferase activity; GO:0006749,glutathione metabolic process; GO:0009407,toxin catabolic process	PF14303.6:No apical meristem-associated C-terminal domain
gene-LOC110726823	1.11	0.07	0.52	1.65	23.38	16.36	36	2	14	34	716	473	4.58781	2.72867e-05	0.00465273	up	NW_018742881.1	1834839	1837233	-	LOC110726823	--	--	--	GDSL esterase/lipase At3g48460-like [Chenopodium quinoa]	RecName: Full=GDSL esterase/lipase At3g48460; EC=3.1.1.-; AltName: Full=Extracellular lipase At3g48460; Flags: Precursor;	SubName: Full=Uncharacterized protein {ECO:0000313|EMBL:KNA11402.1};	--	GO:0005576,extracellular region; GO:0008126,acetylesterase activity; GO:0006631,fatty acid metabolic process; GO:0016042,lipid catabolic process	PF00657.22:GDSL-like Lipase/Acylhydrolase
gene-LOC110726840	3.67	4.38	2.87	19.77	40.54	45.82	128	144	83	437	1330	1419	3.35362	5.38183e-19	4.42777e-15	up	NW_018742881.1	2142069	2147972	+	LOC110726840	--	K10523 speckle-type POZ protein | (RefSeq) BTB/POZ domain-containing protein At4g08455-like (A)	--	BTB/POZ and TAZ domain-containing protein 1-like [Chenopodium quinoa]	RecName: Full=BTB/POZ and TAZ domain-containing protein 2; AltName: Full=BTB and TAZ domain protein 2;	SubName: Full=Uncharacterized protein {ECO:0000313|EMBL:KNA07793.1};	CREB binding protein/P300 and related TAZ Zn-finger proteins	GO:0005737,cytoplasm; GO:0005634,nucleus; GO:0019005,SCF ubiquitin ligase complex; GO:0005516,calmodulin binding; GO:0004402,histone acetyltransferase activity; GO:0003712,transcription coregulator activity; GO:0031625,ubiquitin protein ligase binding; GO:0008270,zinc ion binding; GO:0009738,abscisic acid-activated signaling pathway; GO:0009734,auxin-activated signaling pathway; GO:0007623,circad…	PF02135.16:TAZ zinc finger
gene-LOC110726911	36.34	61.27	36.06	105.94	85.54	87.76	1115	1772	918	2059	2468	2390	1.20684	0.000228975	0.0186518	up	NW_018742890.1	464776	466390	+	LOC110726911	--	K13425 WRKY transcription factor 22 | (RefSeq) WRKY transcription factor 22-like (A)	ko04016: MAPK signaling pathway - plant; ko04626: Plant-pathogen interaction	WRKY transcription factor WRKY51-like [Chenopodium quinoa]	RecName: Full=Probable WRKY transcription factor 11; AltName: Full=WRKY DNA-binding protein 11;	SubName: Full=Uncharacterized protein {ECO:0000313|EMBL:KMS99408.1};	--	GO:0005634,nucleus; GO:0005516,calmodulin binding; GO:0003700,DNA-binding transcription factor activity; GO:0043565,sequence-specific DNA binding; GO:0042742,defense response to bacterium; GO:0010200,response to chitin; GO:0006351,transcription, DNA-templated	PF03106.15:WRKY DNA -binding domain
gene-LOC110727076	73.48	198.17	415.36	62.51	23.87	45.84	2223	5652	10427	1198	679	1231	-2.26191	0.000865861	0.0447325	down	NW_018742899.1	1076498	1078314	-	LOC110727076	--	K14504 xyloglucan:xyloglucosyl transferase TCH4 [EC:2.4.1.207] | (RefSeq) probable xyloglucan endotransglucosylase/hydrolase protein 23 (A)	ko04075: Plant hormone signal transduction	probable xyloglucan endotransglucosylase/hydrolase protein 23 [Chenopodium quinoa]	RecName: Full=Probable xyloglucan endotransglucosylase/hydrolase protein 23; Short=At-XTH23; Short=XTH-23; EC=2.4.1.207; Flags: Precursor;	RecName: Full=Xyloglucan endotransglucosylase/hydrolase {ECO:0000256|RuleBase:RU361120}; EC=2.4.1.207 {ECO:0000256|RuleBase:RU361120};	--	GO:0048046,apoplast; GO:0005618,cell wall; GO:0005794,Golgi apparatus; GO:0004553,hydrolase activity, hydrolyzing O-glycosyl compounds; GO:0016762,xyloglucan:xyloglucosyl transferase activity; GO:0042546,cell wall biogenesis; GO:0071555,cell wall organization; GO:0010411,xyloglucan metabolic process	PF00722.21:Glycosyl hydrolases family 16
gene-LOC110727155	2.59	3.11	1.85	4.65	5.1	12.81	158	179	94	180	293	695	1.63877	0.000852643	0.044328	up	NW_018742899.1	2820854	2827944	+	LOC110727155	--	--	--	--	--	--	--	--	--
gene-LOC110727308	17.51	14.66	18.29	5.12	3.67	6.9	1710	1350	1482	317	337	598	-1.60896	5.03694e-06	0.00123702	down	NW_018742904.1	333191	364284	-	LOC110727308	--	K00020 3-hydroxyisobutyrate dehydrogenase [EC:1.1.1.31] | (RefSeq) probable 3-hydroxyisobutyrate dehydrogenase-like 1, mitochondrial (A)	ko00280: Valine, leucine and isoleucine degradation	uncharacterized protein LOC110727308 [Chenopodium quinoa]	RecName: Full=Probable 3-hydroxyisobutyrate dehydrogenase-like 1, mitochondrial; Short=HIBADH-like; EC=1.1.1.31; Flags: Precursor;	SubName: Full=Uncharacterized protein {ECO:0000313|EMBL:KNA15441.1};	Predicted dehydrogenase	GO:0005829,cytosol; GO:0005739,mitochondrion; GO:0008442,3-hydroxyisobutyrate dehydrogenase activity; GO:0051287,NAD binding; GO:0004616,phosphogluconate dehydrogenase (decarboxylating) activity; GO:0006574,valine catabolic process	PF01116.20:Fructose-bisphosphate aldolase class-II
gene-LOC110727516	0.68	0.75	1.96	0	0.03	0.09	25	26	60	0	1	3	-4.75215	0.000734611	0.040427	down	NW_018742907.1	502598	504676	+	LOC110727516	--	K13691 pathogen-inducible salicylic acid glucosyltransferase [EC:2.4.1.-] | (RefSeq) UDP-glycosyltransferase 74G1-like (A)	--	UDP-glycosyltransferase 74G1-like [Chenopodium quinoa]	RecName: Full=UDP-glycosyltransferase 74G1 {ECO:0000303|PubMed:15610349}; EC=2.4.1.- {ECO:0000305};	RecName: Full=Glycosyltransferase {ECO:0000256|RuleBase:RU362057}; EC=2.4.1.- {ECO:0000256|RuleBase:RU362057};	UDP-glucuronosyl and UDP-glucosyl transferase	GO:0035251,UDP-glucosyltransferase activity; GO:0008152,metabolic process	PF00201.18:UDP-glucoronosyl and UDP-glucosyl transferase
gene-LOC110727573	44.96	32.98	37.71	15.42	12.46	8.89	1128	780	785	245	294	198	-1.53049	0.000344366	0.0251205	down	NW_018742907.1	1321656	1322889	+	LOC110727573	--	--	--	uncharacterized protein LOC110727573 [Chenopodium quinoa]	--	SubName: Full=Uncharacterized protein {ECO:0000313|EMBL:PHT53944.1};	--	--	--
gene-LOC110728094	0	0.02	0	0	2.88	2.37	0	1	0	0	117	91	7.62074	0.000789082	0.042478	up	NW_018742914.1	7250552	7255837	+	LOC110728094	--	K01728 pectate lyase [EC:4.2.2.2] | (RefSeq) probable pectate lyase 8 (A)	ko00040: Pentose and glucuronate interconversions	probable pectate lyase 8 [Chenopodium quinoa]	RecName: Full=Probable pectate lyase 15; EC=4.2.2.2; AltName: Full=Pectate lyase A11; Flags: Precursor;	RecName: Full=Pectate lyase {ECO:0000256|RuleBase:RU361123}; EC=4.2.2.2 {ECO:0000256|RuleBase:RU361123}; Flags: Fragment;	--	GO:0046872,metal ion binding; GO:0030570,pectate lyase activity; GO:0045490,pectin catabolic process	PF00544.19:Pectate lyase
gene-LOC110728108	2.31	6.58	8.71	0	0.55	0.72	72	193	225	0	16	20	-3.76318	0.000532285	0.0334933	down	NW_018742914.1	7549673	7552251	+	LOC110728108	--	K13430 serine/threonine-protein kinase PBS1 [EC:2.7.11.1] | (RefSeq) serine/threonine-protein kinase PBS1-like (A)	ko04626: Plant-pathogen interaction	probable serine/threonine-protein kinase PBL7 [Chenopodium quinoa]	RecName: Full=Probable serine/threonine-protein kinase PBL26 {ECO:0000305}; EC=2.7.11.1 {ECO:0000305}; AltName: Full=PBS1-like protein 26 {ECO:0000303|PubMed:20413097};	SubName: Full=Uncharacterized protein {ECO:0000313|EMBL:KNA24923.1};	Serine/threonine protein kinase	GO:0005886,plasma membrane; GO:0005524,ATP binding; GO:0004675,transmembrane receptor protein serine/threonine kinase activity; GO:0007166,cell surface receptor signaling pathway; GO:0006952,defense response; GO:0006468,protein phosphorylation	PF07714.17:Protein tyrosine kinase
gene-LOC110728208	47.54	32.83	36.83	12.1	15.96	14.5	868	565	558	140	274	235	-1.37916	6.59808e-05	0.0083194	down	NW_018742914.1	8746666	8750561	+	LOC110728208	--	K02874 large subunit ribosomal protein L14 | (RefSeq) 50S ribosomal protein HLP, mitochondrial-like (A)	ko03010: Ribosome	50S ribosomal protein HLP, mitochondrial-like [Chenopodium quinoa]	RecName: Full=50S ribosomal protein HLP, mitochondrial; AltName: Full=Protein HUELLENLOS PARALOG; Flags: Precursor;	SubName: Full=Uncharacterized protein {ECO:0000313|EMBL:KNA25265.1};	60S ribosomal protein L14/L17/L23	GO:0005762,mitochondrial large ribosomal subunit; GO:0005739,mitochondrion; GO:0070180,large ribosomal subunit rRNA binding; GO:0003735,structural constituent of ribosome; GO:0006412,translation	PF00238.19:Ribosomal protein L14p/L23e
gene-LOC110728240	5.14	4.4	0.35	15.67	20.43	36.78	161	130	9	311	602	1023	2.96304	0.000346886	0.0252002	up	NW_018742914.1	9139692	9143949	-	LOC110728240	--	--	--	uncharacterized protein LOC110728240 [Chenopodium quinoa]	RecName: Full=Putative glutamine amidotransferase GAT1_2.1 {ECO:0000305}; EC=2.4.2.- {ECO:0000305}; AltName: Full=Class I glutamine amidotransferase {ECO:0000303|PubMed:22885937}; AltName: Full=GAT1_2 domain-containing protein 1 {ECO:0000305};	SubName: Full=Uncharacterized protein {ECO:0000313|EMBL:ESR43968.1};	--	GO:0016787,hydrolase activity; GO:0016740,transferase activity; GO:0006541,glutamine metabolic process; GO:2000032,regulation of secondary shoot formation	PF07722.13:Peptidase C26
gene-LOC110728343	23.94	20.87	31.87	8.1	9.31	10.3	555	456	613	119	203	212	-1.39262	0.000127309	0.0127344	down	NW_018742927.1	3138	6653	-	LOC110728343	--	--	--	--	--	--	--	--	--
gene-LOC110728530	28.71	25.16	33.63	10.14	11.78	13.57	858	709	834	192	331	360	-1.22568	6.85088e-05	0.00853408	down	NW_018742951.1	4054400	4069073	+	LOC110728530	--	--	--	phosphoglucan phosphatase DSP4, amyloplastic-like isoform X1 [Chenopodium quinoa]	RecName: Full=Phosphoglucan phosphatase DSP4, amyloplastic {ECO:0000250|UniProtKB:Q9FEB5}; EC=3.1.3.- {ECO:0000250|UniProtKB:Q9FEB5}; AltName: Full=Dual specificity protein phosphatase 4 {ECO:0000303|PubMed:21631532}; Short=CsDSP4 {ECO:0000303|PubMed:21631532}; Flags: Precursor;	SubName: Full=Uncharacterized protein {ECO:0000313|EMBL:KNA21364.1};	Dual specificity phosphatase	GO:0009501,amyloplast; GO:0005634,nucleus; GO:0019203,carbohydrate phosphatase activity; GO:0008138,protein tyrosine/serine/threonine phosphatase activity; GO:0007623,circadian rhythm; GO:0005982,starch metabolic process	PF16561.5:Glycogen recognition site of AMP-activated protein kinase
gene-LOC110728719	34.79	39.83	51.69	15.83	18.47	19.02	1426	1539	1758	411	712	692	-1.15707	0.000105537	0.0110962	down	NW_018742959.1	37622	42314	+	LOC110728719	--	K13811 3'-phosphoadenosine 5'-phosphosulfate synthase [EC:2.7.7.4 2.7.1.25] | (RefSeq) ATP sulfurylase 1, chloroplastic-like (A)	ko00230: Purine metabolism; ko00261: Monobactam biosynthesis; ko00450: Selenocompound metabolism; ko00920: Sulfur metabolism	ATP sulfurylase 1, chloroplastic-like [Chenopodium quinoa]	RecName: Full=ATP sulfurylase 1, chloroplastic; Short=AtPS1; EC=2.7.7.4; Flags: Precursor;	SubName: Full=Uncharacterized protein {ECO:0000313|EMBL:KNA08144.1};	ATP sulfurylase (sulfate adenylyltransferase)	GO:0009507,chloroplast; GO:0009570,chloroplast stroma; GO:0005886,plasma membrane; GO:0004020,adenylylsulfate kinase activity; GO:0005524,ATP binding; GO:0004781,sulfate adenylyltransferase (ATP) activity; GO:0070814,hydrogen sulfide biosynthetic process; GO:0046686,response to cadmium ion; GO:0009735,response to cytokinin; GO:0001887,selenium compound metabolic process; GO:0000103,sulfate assimi…	PF01747.17:ATP-sulfurylase
gene-LOC110728737	16.44	16.16	23.23	5.03	4.9	6.55	232	215	272	45	65	82	-1.68354	9.67071e-05	0.0104689	down	NW_018742959.1	2089881	2094361	-	LOC110728737	--	--	--	--	--	--	--	--	--
gene-LOC110729071	1.75	3.91	4.21	10.93	13.42	16.77	27	57	54	107	195	230	2.15162	3.90653e-05	0.00596546	up	NW_018742969.1	234378	235137	+	LOC110729071	--	K03627 putative transcription factor | (RefSeq) multiprotein-bridging factor 1c-like (A)	--	multiprotein-bridging factor 1c-like [Chenopodium quinoa]	RecName: Full=Multiprotein-bridging factor 1c;	SubName: Full=Uncharacterized protein {ECO:0000313|EMBL:KNA16812.1};	Transcription factor MBF1	GO:0005737,cytoplasm; GO:0005730,nucleolus; GO:0003700,DNA-binding transcription factor activity; GO:0043565,sequence-specific DNA binding; GO:0003713,transcription coactivator activity; GO:0009873,ethylene-activated signaling pathway; GO:0045893,positive regulation of transcription, DNA-templated; GO:0009737,response to abscisic acid; GO:0009408,response to heat; GO:0009414,response to water dep…	PF08523.10:Multiprotein bridging factor 1
gene-LOC110729100	0.68	0.29	0.57	0.83	8.01	6.9	62	25	43	48	684	556	3.3463	4.22582e-05	0.00629265	up	NW_018742969.1	494767	503690	+	LOC110729100	--	K05643 ATP-binding cassette, subfamily A (ABC1), member 3 | (RefSeq) ABC transporter A family member 1-like isoform X1 (A)	ko02010: ABC transporters	ABC transporter G family member 32-like isoform X1 [Chenopodium quinoa]	RecName: Full=ABC transporter G family member 32 {ECO:0000303|PubMed:18299247}; Short=ABC transporter ABCG.32; Short=AtABCG32 {ECO:0000303|PubMed:18299247}; AltName: Full=Pleiotropic drug resistance protein 4 {ECO:0000303|PubMed:12430018, ECO:0000303|PubMed:16506311}; AltName: Full=Protein PERMEABLE CUTICLE 1 {ECO:0000303|PubMed:21628525};	SubName: Full=Uncharacterized protein {ECO:0000313|EMBL:KNA14919.1};	Pleiotropic drug resistance proteins (PDR1-15), ABC superfamily	GO:0016021,integral component of membrane; GO:0005886,plasma membrane; GO:0005524,ATP binding; GO:0042626,ATPase activity, coupled to transmembrane movement of substances; GO:0042335,cuticle development; GO:0006855,drug transmembrane transport	PF01061.24:ABC-2 type transporter
gene-LOC110729142	0.37	0.97	0.69	10.65	8.08	6.4	43	107	67	789	889	665	3.79569	1.2976e-14	3.55855e-11	up	NW_018742969.1	1026260	1038325	-	LOC110729142	--	--	--	transcription initiation factor TFIID subunit 15-like isoform X1 [Chenopodium quinoa]	--	SubName: Full=Uncharacterized protein {ECO:0000313|EMBL:KNA15812.1};	RNA-binding Ran Zn-finger protein and related proteins	GO:0046872,metal ion binding	PF00641.18:Zn-finger in Ran binding protein and others
gene-LOC110729144	11.49	9.93	13.32	140.21	53.43	56.89	367	299	353	2837	1605	1613	3.00685	3.24532e-08	1.94182e-05	up	NW_018742969.1	1030756	1032778	+	LOC110729144	--	--	--	zinc finger Ran-binding domain-containing protein 2-like [Chenopodium quinoa]	RecName: Full=RanBP2-type zinc finger protein At1g67325;	SubName: Full=Uncharacterized protein {ECO:0000313|EMBL:KNA15813.1};	RNA-binding Ran Zn-finger protein and related proteins	GO:0046872,metal ion binding; GO:0003729,mRNA binding	PF00641.18:Zn-finger in Ran binding protein and others
gene-LOC110729171	18.83	18.83	2.29	28.23	129.24	136.92	139	131	14	132	897	897	2.94712	0.000379367	0.0269123	up	NW_018742969.1	830238	830600	+	LOC110729171	--	--	--	uncharacterized protein LOC110729171 [Chenopodium quinoa]	--	SubName: Full=Uncharacterized protein {ECO:0000313|EMBL:KNA25442.1};	--	--	--
gene-LOC110729235	0.32	0.4	0	0.98	4.84	5.43	18	21	0	35	256	271	4.04613	0.000492594	0.0319739	up	NW_018742974.1	2272625	2275391	-	LOC110729235	--	K09840 9-cis-epoxycarotenoid dioxygenase [EC:1.13.11.51] | (RefSeq) 9-cis-epoxycarotenoid dioxygenase NCED1, chloroplastic-like (A)	ko00906: Carotenoid biosynthesis	9-cis-epoxycarotenoid dioxygenase NCED1, chloroplastic-like [Chenopodium quinoa]	RecName: Full=9-cis-epoxycarotenoid dioxygenase NCED1, chloroplastic; EC=1.13.11.51; AltName: Full=PvNCED1; Flags: Precursor;	SubName: Full=Uncharacterized protein {ECO:0000313|EMBL:KNA11963.1};	Beta, beta-carotene 15,15'-dioxygenase and related enzymes	GO:0009535,chloroplast thylakoid membrane; GO:0045549,9-cis-epoxycarotenoid dioxygenase activity; GO:0046872,metal ion binding; GO:0009688,abscisic acid biosynthetic process	PF03055.15:Retinal pigment epithelial membrane protein
gene-LOC110729554	44.9	54.85	51.21	14.83	22.04	29.45	1510	1739	1429	316	697	879	-1.1155	8.41599e-05	0.00956719	down	NW_018742987.1	493381	497094	-	LOC110729554	--	K20723 reticulon-3 | (RefSeq) reticulon-like protein B11 (A)	--	reticulon-like protein B4 [Chenopodium quinoa]	RecName: Full=Reticulon-like protein B1; Short=AtRTNLB1; AltName: Full=VirB2-interacting protein 1;	RecName: Full=Reticulon-like protein {ECO:0000256|RuleBase:RU363132};	Reticulon	GO:0005783,endoplasmic reticulum; GO:0005789,endoplasmic reticulum membrane; GO:0071782,endoplasmic reticulum tubular network; GO:0071458,integral component of cytoplasmic side of endoplasmic reticulum membrane; GO:0005886,plasma membrane; GO:0005773,vacuole; GO:0071786,endoplasmic reticulum tubular network organization	PF02453.17:Reticulon
gene-LOC110729652	0.66	0.3	1.52	3.62	9.11	11.49	14	6	27	49	183	218	3.29733	7.04728e-05	0.00862152	up	NW_018742987.1	1422231	1423946	-	LOC110729652	--	--	--	uncharacterized protein LOC110729652 [Chenopodium quinoa]	--	SubName: Full=Uncharacterized protein {ECO:0000313|EMBL:KNA21066.1};	--	--	PF06521.11:PAR1 protein
gene-LOC110729855	133.86	119.4	182.9	54.84	63.52	62.84	2131	1792	2416	553	951	888	-1.18638	0.000235948	0.0190314	down	NW_018743014.1	645832	649582	+	LOC110729855	--	K02152 V-type H+-transporting ATPase subunit G | (RefSeq) V-type proton ATPase subunit G 1-like (A)	ko00190: Oxidative phosphorylation; ko04145: Phagosome	V-type proton ATPase subunit G 1-like [Chenopodium quinoa]	RecName: Full=V-type proton ATPase subunit G 1; Short=V-ATPase subunit G 1; AltName: Full=Vacuolar proton pump subunit G 1;	RecName: Full=V-type proton ATPase subunit G {ECO:0000256|RuleBase:RU364019};	Vacuolar H+-ATPase V1 sector, subunit G	GO:0016471,vacuolar proton-transporting V-type ATPase complex; GO:0042626,ATPase activity, coupled to transmembrane movement of substances; GO:0015992,NA	PF03179.15:Vacuolar (H+)-ATPase G subunit
gene-LOC110729886	39.93	65.04	68.32	129.35	112.82	204.77	734	1127	1042	1506	1950	3341	1.44985	4.06314e-05	0.00610566	up	NW_018743014.1	1658010	1659177	-	LOC110729886	--	--	--	uncharacterized protein LOC110729886 [Chenopodium quinoa]	--	SubName: Full=Uncharacterized protein {ECO:0000313|EMBL:KNA21688.1};	Nuclear localization sequence binding protein	--	--
gene-LOC110729899	5.39	1.48	1.19	3.77	89	92.64	158	41	29	70	2454	2411	4.50452	4.93188e-06	0.00122033	up	NW_018743014.1	1904642	1907659	-	LOC110729899	--	--	--	GDSL esterase/lipase APG-like [Chenopodium quinoa]	RecName: Full=GDSL esterase/lipase APG; EC=3.1.1.-; AltName: Full=Extracellular lipase APG; Flags: Precursor;	SubName: Full=Uncharacterized protein {ECO:0000313|EMBL:KNA16300.1};	--	GO:0048046,apoplast; GO:0016788,hydrolase activity, acting on ester bonds; GO:0016042,lipid catabolic process	PF00657.22:GDSL-like Lipase/Acylhydrolase
gene-LOC110729935	4.33	5.99	3.26	6.7	13.42	14.77	303	395	189	297	883	917	1.44635	0.000194476	0.0167556	up	NW_018742205.1	4526766	4546304	+	LOC110729935	--	--	--	uncharacterized protein LOC110729935 isoform X1 [Chenopodium quinoa]	--	SubName: Full=Uncharacterized protein {ECO:0000313|EMBL:KNA08959.1};	Ca2+-binding transmembrane protein LETM1/MRS7	--	PF07766.13:LETM1-like protein
gene-LOC110730028	42.37	52.34	46.96	17.13	14.74	14.19	535	623	492	137	175	159	-1.50344	4.47459e-06	0.00114151	down	NW_018743021.1	1473041	1473661	-	LOC110730028	--	--	--	uncharacterized protein LOC110730028 [Chenopodium quinoa]	--	SubName: Full=Uncharacterized protein {ECO:0000313|EMBL:KNA25876.1};	--	--	--
gene-LOC110730072	3.13	2.45	1.38	4.28	10.23	11.43	156	115	57	135	479	505	1.95517	0.000204843	0.0173742	up	NW_018743021.1	52322	56999	-	LOC110730072	--	--	--	--	--	--	--	--	--
gene-LOC110730096	51.42	72.55	86.31	163.8	150.64	276.99	2508	3336	3493	5061	6910	11993	1.56378	5.99309e-06	0.00138892	up	NW_018743021.1	302869	305267	-	LOC110730096	--	K09840 9-cis-epoxycarotenoid dioxygenase [EC:1.13.11.51] | (RefSeq) probable carotenoid cleavage dioxygenase 4, chloroplastic (A)	ko00906: Carotenoid biosynthesis	probable carotenoid cleavage dioxygenase 4, chloroplastic [Chenopodium quinoa]	RecName: Full=Probable carotenoid cleavage dioxygenase 4, chloroplastic; Short=AtCCD4; EC=1.14.99.-; AltName: Full=AtNCED4; Flags: Precursor;	SubName: Full=Uncharacterized protein {ECO:0000313|EMBL:KNA23039.1};	Beta, beta-carotene 15,15'-dioxygenase and related enzymes	GO:0009507,chloroplast; GO:0010287,plastoglobule; GO:0046872,metal ion binding; GO:0016702,oxidoreductase activity, acting on single donors with incorporation of molecular oxygen, incorporation of two atoms of oxygen	PF03055.15:Retinal pigment epithelial membrane protein
gene-LOC110730125	44.19	33.52	25.82	52.2	91.98	90.93	1382	988	670	1034	2705	2524	1.25511	0.000312226	0.0236208	up	NW_018743021.1	642207	646761	+	LOC110730125	--	--	--	probable plastid-lipid-associated protein 3, chloroplastic [Chenopodium quinoa]	RecName: Full=Probable plastid-lipid-associated protein 3, chloroplastic; Short=AtPap3; AltName: Full=Fibrillin-2; AltName: Full=Plastoglobulin 40; Short=AtPGL40; Flags: Precursor;	SubName: Full=Uncharacterized protein {ECO:0000313|EMBL:KNA17883.1};	--	GO:0009507,chloroplast; GO:0009534,chloroplast thylakoid; GO:0009535,chloroplast thylakoid membrane; GO:0009536,plastid; GO:0010287,plastoglobule; GO:0009579,thylakoid	PF04755.12:PAP_fibrillin
gene-LOC110730135	18	14.05	24.98	5.68	8.07	7.46	780	574	898	156	329	287	-1.35857	0.000596867	0.0358436	down	NW_018743021.1	727140	733144	+	LOC110730135	--	K08488 syntaxin 7 | (RefSeq) syntaxin-22-like (A)	ko04130: SNARE interactions in vesicular transport; ko04145: Phagosome	syntaxin-22-like [Chenopodium quinoa]	RecName: Full=Syntaxin-22; Short=AtSYP22; Short=AtVAM3; AltName: Full=Protein SHOOT GRAVITROPISM 3;	SubName: Full=Uncharacterized protein {ECO:0000313|EMBL:KNA17894.1};	SNARE protein PEP12/VAM3/Syntaxin 7/Syntaxin 17	GO:0016021,integral component of membrane; GO:0031902,late endosome membrane; GO:0000325,plant-type vacuole; GO:0009705,plant-type vacuole membrane; GO:0031201,SNARE complex; GO:0005773,vacuole; GO:0005484,SNAP receptor activity; GO:0000149,SNARE binding; GO:0009660,amyloplast organization; GO:0006886,intracellular protein transport; GO:0009959,negative gravitropism; GO:0010118,stomatal movement;…	PF14523.6:Syntaxin-like protein
gene-LOC110730174	13.53	24.11	12.39	56.76	40.14	63.52	400	672	304	1063	1116	1667	1.81217	7.62617e-07	0.000291825	up	NW_018743021.1	1058204	1061032	-	LOC110730174	--	--	--	uncharacterized protein LOC110730174 [Chenopodium quinoa]	--	SubName: Full=Uncharacterized protein {ECO:0000313|EMBL:KNA11271.1};	--	--	PF04640.14:PLATZ transcription factor
gene-LOC110730178	53.46	33.91	47.22	5.11	13.08	17.13	1438	860	1054	87	331	409	-1.90482	8.35049e-05	0.00955383	down	NW_018743021.1	1126083	1127405	+	LOC110730178	--	--	--	glycine-rich cell wall structural protein 1.8-like [Chenopodium quinoa]	--	SubName: Full=Uncharacterized protein {ECO:0000313|EMBL:KMS94780.1};	--	--	--
gene-LOC110730179	125.72	105.04	104.42	22.68	18.04	25.81	3282	2585	2262	375	443	598	-2.24068	1.17309e-14	3.50957e-11	down	NW_018743021.1	1121931	1123214	+	LOC110730179	--	--	--	glycine-rich cell wall structural protein 1.8-like [Chenopodium quinoa]	--	SubName: Full=Uncharacterized protein {ECO:0000313|EMBL:KNA13405.1};	--	--	--
gene-LOC110730181	18.53	5.52	15.47	0.61	1.88	1.99	765	215	530	16	73	73	-3.12796	3.32856e-06	0.000912831	down	NW_018743021.1	1155175	1160011	+	LOC110730181	--	--	--	--	--	--	--	--	--
gene-LOC110730258	14.8	15.62	21.98	6.27	4.95	7.78	645	642	795	173	203	301	-1.38249	0.000223813	0.0183677	down	NW_018743021.1	2173122	2175644	+	LOC110730258	--	K19042 E3 ubiquitin-protein ligase BOI and related proteins [EC:2.3.2.27] | (RefSeq) BOI-related E3 ubiquitin-protein ligase 1-like (A)	--	BOI-related E3 ubiquitin-protein ligase 1-like [Chenopodium quinoa]	RecName: Full=Probable BOI-related E3 ubiquitin-protein ligase 3; EC=2.3.2.27 {ECO:0000250|UniProtKB:Q9FHE4}; AltName: Full=RING-type E3 ubiquitin transferase BRG3 {ECO:0000305};	SubName: Full=Uncharacterized protein {ECO:0000313|EMBL:KMT11727.1};	Predicted E3 ubiquitin ligase	GO:0005634,nucleus; GO:0046872,metal ion binding; GO:0016740,transferase activity; GO:0006952,defense response; GO:0043161,proteasome-mediated ubiquitin-dependent protein catabolic process; GO:0043067,regulation of programmed cell death	PF13920.6:Zinc finger, C3HC4 type (RING finger)
gene-LOC110730263	37.31	50.04	38.6	97.96	225.36	245.57	1429	1807	1227	2377	8118	8350	2.243	2.58989e-10	2.93327e-07	up	NW_018743021.1	2316003	2318597	+	LOC110730263	--	K01177 beta-amylase [EC:3.2.1.2] | (RefSeq) beta-amylase 3, chloroplastic-like (A)	ko00500: Starch and sucrose metabolism	beta-amylase 3, chloroplastic-like [Chenopodium quinoa]	RecName: Full=Beta-amylase 3, chloroplastic; EC=3.2.1.2; AltName: Full=1,4-alpha-D-glucan maltohydrolase; AltName: Full=Beta-amylase 8; AltName: Full=Chloroplast beta-amylase; Short=CT-BMY; Flags: Precursor;	RecName: Full=Beta-amylase {ECO:0000256|RuleBase:RU000509}; EC=3.2.1.2 {ECO:0000256|RuleBase:RU000509};	--	GO:0009570,chloroplast stroma; GO:0102229,amylopectin maltohydrolase activity; GO:0016161,beta-amylase activity; GO:0000024,maltose biosynthetic process; GO:0009409,response to cold; GO:0005983,starch catabolic process	PF01373.17:Glycosyl hydrolase family 14
gene-LOC110730331	60.67	117.95	63.96	119.75	200.11	289.81	1717	3147	1502	2147	5326	7281	1.41576	0.00017991	0.0159158	up	NW_018743021.1	3225861	3227252	+	LOC110730331	--	K09286 EREBP-like factor | (RefSeq) ethylene-responsive transcription factor ERF104-like (A)	--	ethylene-responsive transcription factor ERF104-like [Chenopodium quinoa]	RecName: Full=Ethylene-responsive transcription factor ERF105;	SubName: Full=Uncharacterized protein {ECO:0000313|EMBL:KNA24910.1};	--	GO:0005634,nucleus; GO:0003677,DNA binding; GO:0003700,DNA-binding transcription factor activity; GO:0009873,ethylene-activated signaling pathway; GO:0010200,response to chitin; GO:0006351,transcription, DNA-templated	PF00847.20:AP2 domain
gene-LOC110730483	12.01	25.58	9.42	32.16	44.11	54.99	424	851	276	719	1464	1723	1.60031	0.000117552	0.0120599	up	NW_018743033.1	53091	58176	-	LOC110730483	--	--	--	protein DEHYDRATION-INDUCED 19-like [Chenopodium quinoa]	RecName: Full=Protein DEHYDRATION-INDUCED 19; AltName: Full=OsDi19;	SubName: Full=Uncharacterized protein {ECO:0000313|EMBL:KNA05891.1};	--	--	PF14571.6:Stress-induced protein Di19, C-terminal
gene-LOC110730529	0	0	0	0.93	5.05	3.47	0	0	0	20	162	105	9.12438	1.45209e-08	1.03957e-05	up	NW_018743033.1	1045539	1050550	-	LOC110730529	--	--	--	GDSL esterase/lipase At5g45950-like [Chenopodium quinoa]	RecName: Full=GDSL esterase/lipase At5g45950; EC=3.1.1.-; AltName: Full=Extracellular lipase At5g45950; Flags: Precursor;	SubName: Full=Uncharacterized protein {ECO:0000313|EMBL:CCB55647.1};	--	GO:0005576,extracellular region; GO:0016788,hydrolase activity, acting on ester bonds; GO:0016042,lipid catabolic process	PF00657.22:GDSL-like Lipase/Acylhydrolase
gene-LOC110730609	0.09	0.02	0	0.71	1.28	1.94	5	1	0	25	67	96	5.16822	2.01249e-05	0.00357995	up	NW_018743033.1	2926759	2933289	+	LOC110730609	--	K13415 protein brassinosteroid insensitive 1 [EC:2.7.10.1 2.7.11.1] | (RefSeq) systemin receptor SR160-like (A)	ko04075: Plant hormone signal transduction	calmodulin-binding receptor kinase CaMRLK-like [Chenopodium quinoa]	RecName: Full=Calmodulin-binding receptor kinase CaMRLK {ECO:0000305}; EC=2.7.11.1 {ECO:0000269|PubMed:14720124}; AltName: Full=Calmodulin-binding receptor-like kinase {ECO:0000303|PubMed:14720124}; Short=AtCaMRLK {ECO:0000303|PubMed:14720124}; AltName: Full=Protein MATERNAL EFFECT EMBRYO ARREST 62 {ECO:0000303|PubMed:15634699}; Flags: Precursor;	SubName: Full=Uncharacterized protein {ECO:0000313|EMBL:KNA17461.1};	--	GO:0016021,integral component of membrane; GO:0005886,plasma membrane; GO:0005524,ATP binding; GO:0005516,calmodulin binding; GO:0004672,protein kinase activity; GO:0009793,embryo development ending in seed dormancy; GO:0046777,protein autophosphorylation; GO:0009733,response to auxin; GO:0009625,response to insect; GO:0006970,response to osmotic stress	PF07714.17:Protein tyrosine kinase
gene-LOC110730688	26.64	38.82	51.04	15.38	11.44	14.67	495	680	787	181	200	242	-1.38529	0.000826271	0.0435765	down	NW_018743047.1	1904291	1908355	+	LOC110730688	--	K12486 stromal membrane-associated protein | (RefSeq) ADP-ribosylation factor GTPase-activating protein AGD12-like (A)	ko04144: Endocytosis	protein C2-DOMAIN ABA-RELATED 4-like [Chenopodium quinoa]	RecName: Full=Protein C2-DOMAIN ABA-RELATED 4 {ECO:0000303|PubMed:25465408}; AltName: Full=C2 domain-containing protein; Short=AtC2; AltName: Full=GTPase activating protein 1 {ECO:0000303|PubMed:23550829}; Short=AtGAP1 {ECO:0000303|PubMed:23550829};	SubName: Full=Uncharacterized protein {ECO:0000313|EMBL:KNA22377.1};	Predicted Ca2+-dependent phospholipid-binding protein	GO:0005829,cytosol; GO:0005634,nucleus; GO:0005886,plasma membrane; GO:0005096,GTPase activator activity; GO:0046872,metal ion binding; GO:0005543,phospholipid binding; GO:0009738,abscisic acid-activated signaling pathway; GO:0006952,defense response; GO:0009789,positive regulation of abscisic acid-activated signaling pathway; GO:1902479,positive regulation of defense response to bacterium, incom…	PF00168.30:C2 domain
gene-LOC110730694	0.8	0	0	2.45	15.56	11.25	14	0	0	27	255	174	5.16104	0.000890161	0.0456818	up	NW_018742205.1	5962605	5964331	-	LOC110730694	--	--	--	CASP-like protein 1E1 [Chenopodium quinoa]	RecName: Full=CASP-like protein 1E1; Short=VvCASPL1E1;	RecName: Full=CASP-like protein {ECO:0000256|RuleBase:RU361233};	--	GO:0016021,integral component of membrane; GO:0005886,plasma membrane; GO:0051536,iron-sulfur cluster binding	PF04535.12:Domain of unknown function (DUF588)
gene-LOC110730834	43.53	59.01	98.02	8.2	7.13	20.38	1526	1950	2851	182	235	634	-2.45612	2.36559e-06	0.00070772	down	NW_018743050.1	577846	580187	+	LOC110730834	--	--	--	fasciclin-like arabinogalactan protein 2 [Chenopodium quinoa]	RecName: Full=Fasciclin-like arabinogalactan protein 2; Flags: Precursor;	SubName: Full=Uncharacterized protein {ECO:0000313|EMBL:KNA19187.1};	--	GO:0031225,anchored component of membrane; GO:0046658,anchored component of plasma membrane; GO:0016020,membrane; GO:0005886,plasma membrane; GO:0005774,vacuolar membrane	PF02469.22:Fasciclin domain
gene-LOC110730900	86.39	114.3	235.6	39.46	30.66	41.7	1804	2250	4082	522	602	773	-1.88198	9.98851e-05	0.0106725	down	NW_018742205.1	6538155	6543043	+	LOC110730900	--	K12382 saposin | (RefSeq) proactivator polypeptide-like 1 (A)	ko00600: Sphingolipid metabolism	proactivator polypeptide-like 1 [Chenopodium quinoa]	--	SubName: Full=Uncharacterized protein {ECO:0000313|EMBL:KNA20690.1};	Prosaposin	GO:0006629,lipid metabolic process	PF05184.15:Saposin-like type B, region 1
gene-LOC110731133	0.5	0.08	0	0	54.86	29.58	7	1	0	0	729	371	7.1926	7.61455e-05	0.00904466	up	NW_018742205.1	7091015	7091952	+	LOC110731133	--	--	--	non-specific lipid-transfer protein-like [Chenopodium quinoa]	RecName: Full=Non-specific lipid-transfer protein; Short=LTP; Flags: Precursor;	RecName: Full=Non-specific lipid-transfer protein {ECO:0000256|RuleBase:RU000628};	--	GO:0008289,lipid binding; GO:0050832,defense response to fungus; GO:0031640,killing of cells of other organism; GO:0006869,lipid transport	PF00234.22:Protease inhibitor/seed storage/LTP family
gene-LOC110731145	6.14	7.62	4.75	7.55	29.58	21.12	358	419	230	279	1622	1093	1.72708	0.000672944	0.0381407	up	NW_018743066.1	1159091	1163644	+	LOC110731145	--	K16365 small glutamine-rich tetratricopeptide repeat-containing protein alpha | (RefSeq) uncharacterized protein LOC110724631 (A)	--	protein CLMP1-like [Chenopodium quinoa]	RecName: Full=Protein CLMP1 {ECO:0000303|PubMed:22025705}; AltName: Full=CLUMPED CHLOROPLASTS 1 {ECO:0000303|PubMed:22025705}; AltName: Full=Protein MADB2 {ECO:0000303|PubMed:28096376}; AltName: Full=Protein PHOX2 {ECO:0000303|PubMed:20856808}; AltName: Full=Putative myosin adapter B2 {ECO:0000303|PubMed:28096376};	SubName: Full=Uncharacterized protein {ECO:0000313|EMBL:KNA04024.1};	Myosin assembly protein/sexual cycle protein and related proteins	GO:0005829,cytosol	PF00564.24:PB1 domain
gene-LOC110731356	34.38	38.66	100.89	13.59	8.94	8.62	683	724	1663	171	167	152	-2.37857	5.70665e-05	0.00757258	down	NW_018743066.1	2129251	2131406	+	LOC110731356	--	K13993 HSP20 family protein | (RefSeq) 18.8 kDa class V heat shock protein-like isoform X1 (A)	ko04141: Protein processing in endoplasmic reticulum	18.8 kDa class V heat shock protein-like isoform X1 [Chenopodium quinoa]	RecName: Full=15.4 kDa class V heat shock protein; AltName: Full=15.4 kDa heat shock protein; Short=AtHsp15.4;	SubName: Full=Uncharacterized protein {ECO:0000313|EMBL:KNA22011.1};	Molecular chaperone (small heat-shock protein Hsp26/Hsp42)	GO:0005737,cytoplasm; GO:0009408,response to heat	PF00011.21:Hsp20/alpha crystallin family
gene-LOC110731369	0	0	0	0	2.8	5.67	0	0	0	0	99	189	9.03425	0.000207254	0.0174438	up	NW_018742205.1	7365710	7370329	-	LOC110731369	--	--	--	uncharacterized protein LOC110731369 isoform X1 [Chenopodium quinoa]	--	SubName: Full=Uncharacterized protein {ECO:0000313|EMBL:KNA25993.1};	--	--	PF07468.11:Agglutinin domain
gene-LOC110731545	3.41	4.96	2.26	4.16	23.15	19.1	144	197	79	111	918	715	2.19564	0.000603962	0.0358658	up	NW_018743074.1	418928	423801	+	LOC110731545	--	K13508 glycerol-3-phosphate acyltransferase [EC:2.3.1.15 2.3.1.198] | (RefSeq) glycerol-3-phosphate 2-O-acyltransferase 4-like isoform X1 (A)	ko00561: Glycerolipid metabolism; ko00564: Glycerophospholipid metabolism	glycerol-3-phosphate 2-O-acyltransferase 4-like isoform X1 [Chenopodium quinoa]	RecName: Full=Glycerol-3-phosphate 2-O-acyltransferase 4; Short=AtGPAT4; EC=2.3.1.198; AltName: Full=Glycerol-3-phosphate acyltransferase 4;	SubName: Full=Uncharacterized protein {ECO:0000313|EMBL:KNA19467.1};	--	GO:0016021,integral component of membrane; GO:0016020,membrane; GO:0090447,glycerol-3-phosphate 2-O-acyltransferase activity; GO:0016791,phosphatase activity; GO:0102419,sn-2-glycerol-3-phosphate omega-OH-C22:0-CoA acyl transferase activity; GO:0010143,cutin biosynthetic process; GO:0008654,phospholipid biosynthetic process	PF12710.7:haloacid dehalogenase-like hydrolase
gene-LOC110731563	4.31	5.74	1.65	11.84	9.14	15.75	145	182	46	252	289	470	1.77164	0.00101143	0.0494581	up	NW_018742205.1	7635752	7638599	-	LOC110731563	--	K13459 disease resistance protein RPS2 | (RefSeq) disease resistance protein At4g27190-like isoform X1 (A)	ko04626: Plant-pathogen interaction	probable WRKY transcription factor 30 [Chenopodium quinoa]	RecName: Full=Probable WRKY transcription factor 70; AltName: Full=WRKY DNA-binding protein 70;	SubName: Full=Uncharacterized protein {ECO:0000313|EMBL:KNA05388.1};	--	GO:0005634,nucleus; GO:0003700,DNA-binding transcription factor activity; GO:0043565,sequence-specific DNA binding; GO:0042742,defense response to bacterium; GO:0050832,defense response to fungus; GO:0009864,induced systemic resistance, jasmonic acid mediated signaling pathway; GO:1900056,negative regulation of leaf senescence; GO:0045892,negative regulation of transcription, DNA-templated; GO:00…	PF03106.15:WRKY DNA -binding domain
gene-LOC110731573	47.14	60.85	72.57	23.26	14.28	21.06	2265	2756	2893	708	645	898	-1.51189	4.27251e-05	0.00633351	down	NW_018743074.1	701894	705751	-	LOC110731573	--	K13430 serine/threonine-protein kinase PBS1 [EC:2.7.11.1] | (RefSeq) serine/threonine-protein kinase PBS1-like (A)	ko04626: Plant-pathogen interaction	probable serine/threonine-protein kinase At1g01540 [Chenopodium quinoa]	RecName: Full=Probable serine/threonine-protein kinase At1g01540; EC=2.7.11.1;	SubName: Full=Uncharacterized protein {ECO:0000313|EMBL:KNA19825.1};	Serine/threonine protein kinase	GO:0016021,integral component of membrane; GO:0005886,plasma membrane; GO:0005524,ATP binding; GO:0004674,protein serine/threonine kinase activity; GO:0004675,transmembrane receptor protein serine/threonine kinase activity; GO:0007166,cell surface receptor signaling pathway; GO:0046777,protein autophosphorylation; GO:0006468,protein phosphorylation	PF00069.25:Protein kinase domain
gene-LOC110731583	70.52	105.61	137.61	36.17	35.39	49.56	1659	2342	2686	539	783	1035	-1.28984	0.000303004	0.0231897	down	NW_018743074.1	806326	809180	+	LOC110731583	--	--	--	heavy metal-associated isoprenylated plant protein 39-like [Chenopodium quinoa]	RecName: Full=Heavy metal-associated isoprenylated plant protein 39 {ECO:0000303|PubMed:21072340, ECO:0000303|PubMed:23368984}; Short=AtHIP39 {ECO:0000303|PubMed:21072340, ECO:0000303|PubMed:23368984}; Flags: Precursor;	SubName: Full=Uncharacterized protein {ECO:0000313|EMBL:OIW02040.1};	Copper chaperone	GO:0005737,cytoplasm; GO:0046914,transition metal ion binding; GO:0046916,cellular transition metal ion homeostasis; GO:0030001,metal ion transport	PF00403.26:Heavy-metal-associated domain
gene-LOC110731792	1.77	3.43	2.23	1.82	39.52	63.34	69	126	72	45	1447	2189	3.83423	2.80888e-05	0.00465336	up	NW_018743099.1	98082	101423	+	LOC110731792	--	K13946 auxin influx carrier (AUX1 LAX family) | (RefSeq) auxin transporter-like protein 2 (A)	ko04075: Plant hormone signal transduction	GABA transporter 1-like [Chenopodium quinoa]	RecName: Full=GABA transporter 1; Short=AtGAT1; AltName: Full=Bidirectional amino acid transporter 1;	SubName: Full=Uncharacterized protein {ECO:0000313|EMBL:KNA21162.1};	Amino acid transporters	GO:0016021,integral component of membrane; GO:0005886,plasma membrane; GO:0015171,amino acid transmembrane transporter activity; GO:0015185,gamma-aminobutyric acid transmembrane transporter activity; GO:0003333,amino acid transmembrane transport; GO:0015812,gamma-aminobutyric acid transport	PF01490.18:Transmembrane amino acid transporter protein
gene-LOC110731944	18.51	46.14	58.7	12.96	7.13	9.65	309	726	813	137	112	143	-1.9237	0.000747559	0.0410024	down	NW_018743108.1	40766	43570	+	LOC110731944	--	--	--	--	--	--	--	--	--
gene-LOC110732045	1.2	1.3	1.01	2.86	2.18	3.02	100	102	70	151	171	224	1.30819	0.000913156	0.0464467	up	NW_018743136.1	653197	667792	-	LOC110732045	--	--	--	uncharacterized protein LOC110732045 [Chenopodium quinoa]	--	SubName: Full=Uncharacterized protein {ECO:0000313|EMBL:KNA24497.1};	--	GO:0016021,integral component of membrane; GO:0016787,hydrolase activity	PF00149.28:Calcineurin-like phosphoesterase
gene-LOC110732056	24.95	11.31	43.03	1.58	0.86	2	772	330	1105	31	25	55	-4.11526	2.67398e-10	2.93327e-07	down	NW_018743136.1	2135073	2144248	+	LOC110732056	--	K00826 branched-chain amino acid aminotransferase [EC:2.6.1.42] | (RefSeq) branched-chain-amino-acid aminotransferase 2, chloroplastic-like (A)	ko00270: Cysteine and methionine metabolism; ko00280: Valine, leucine and isoleucine degradation; ko00290: Valine, leucine and isoleucine biosynthesis; ko00770: Pantothenate and CoA biosynthesis; ko00966: Glucosinolate biosynthesis; ko01210: 2-Oxocarboxylic acid metabolism; ko01230: Biosynthesis of amino acids	branched-chain-amino-acid aminotransferase 2, chloroplastic-like [Chenopodium quinoa]	RecName: Full=Branched-chain-amino-acid aminotransferase 2, chloroplastic; Short=Atbcat-2; EC=2.6.1.42; Flags: Precursor;	RecName: Full=Branched-chain-amino-acid aminotransferase {ECO:0000256|RuleBase:RU004517}; EC=2.6.1.42 {ECO:0000256|RuleBase:RU004517};	Branched chain aminotransferase BCAT1, pyridoxal phosphate enzymes type IV superfamily	GO:0009507,chloroplast; GO:0052656,L-isoleucine transaminase activity; GO:0052654,L-leucine transaminase activity; GO:0052655,L-valine transaminase activity; GO:0009097,isoleucine biosynthetic process; GO:0009098,leucine biosynthetic process; GO:0071669,plant-type cell wall organization or biogenesis; GO:0009099,valine biosynthetic process	PF01063.19:Amino-transferase class IV
gene-LOC110732311	1.25	0.25	0	2.65	11.53	12.47	68	13	0	91	588	600	4.14619	0.00095755	0.0480366	up	NW_018743175.1	736089	740968	-	LOC110732311	--	K13699 abhydrolase domain-containing protein 5 [EC:2.3.1.51] | (RefSeq) probable 1-acylglycerol-3-phosphate O-acyltransferase (A)	--	probable lysophospholipase BODYGUARD 3 [Chenopodium quinoa]	RecName: Full=Probable lysophospholipase BODYGUARD 3 {ECO:0000303|PubMed:16415209}; Short=AtBDG3 {ECO:0000303|PubMed:16415209}; EC=3.1.1.- {ECO:0000305}; Flags: Precursor;	SubName: Full=Uncharacterized protein {ECO:0000313|EMBL:KNA24733.1};	Predicted hydrolase/acyltransferase (alpha/beta hydrolase superfamily)	GO:0005618,cell wall; GO:0005576,extracellular region; GO:0005886,plasma membrane; GO:0016787,hydrolase activity; GO:0071555,cell wall organization	PF00561.20:alpha/beta hydrolase fold
gene-LOC110732365	0	0.23	0	19.94	13.77	22.39	0	4	0	237	243	373	8.07936	7.22118e-17	3.39488e-13	up	NW_018743175.1	1475736	1476976	+	LOC110732365	--	K13248 pyridoxal phosphate phosphatase PHOSPHO2 [EC:3.1.3.74] | (RefSeq) inorganic pyrophosphatase 1-like (A)	ko00750: Vitamin B6 metabolism	inorganic pyrophosphatase 1-like [Chenopodium quinoa]	RecName: Full=Inorganic pyrophosphatase 1; Short=AtPPsPase1; Short=PPi phosphatase 1; Short=Pyrophosphate-specific phosphatase 1; EC=3.6.1.1; AltName: Full=Protein PHOSPHATE STARVATION-INDUCED GENE 2; Short=AtPS2;	SubName: Full=Uncharacterized protein {ECO:0000313|EMBL:KNA19685.1};	Predicted haloacid dehalogenase-like hydrolase	GO:0004427,inorganic diphosphatase activity; GO:0046872,metal ion binding; GO:0016791,phosphatase activity; GO:0016462,pyrophosphatase activity; GO:0016036,cellular response to phosphate starvation; GO:0051262,protein tetramerization	PF06888.12:Putative Phosphatase
gene-LOC110732442	3.31	2.06	2.83	4.88	8.64	13.99	138	81	98	129	339	518	1.77517	0.000424361	0.0291551	up	NW_018743175.1	2513020	2516632	+	LOC110732442	--	K00889 1-phosphatidylinositol-4-phosphate 5-kinase [EC:2.7.1.68] | (RefSeq) phosphatidylinositol 4-phosphate 5-kinase 6-like (A)	ko00562: Inositol phosphate metabolism; ko04070: Phosphatidylinositol signaling system; ko04144: Endocytosis	phosphatidylinositol 4-phosphate 5-kinase 6-like [Chenopodium quinoa]	RecName: Full=Phosphatidylinositol 4-phosphate 5-kinase 8; Short=AtPIP5K8; EC=2.7.1.68; AltName: Full=1-phosphatidylinositol 4-phosphate kinase 8; AltName: Full=Diphosphoinositide kinase 8; AltName: Full=PtdIns(4)P-5-kinase 8;	SubName: Full=Uncharacterized protein {ECO:0000313|EMBL:KNA24647.1};	Junctional membrane complex protein Junctophilin and related MORN repeat proteins	GO:0016308,1-phosphatidylinositol-4-phosphate 5-kinase activity; GO:0005524,ATP binding	PF02493.20:MORN repeat
gene-LOC110732446	35.56	41.69	18.52	90.61	186.84	195.55	1407	1555	608	2271	6952	6868	2.38959	3.09568e-09	2.68094e-06	up	NW_018743175.1	2575582	2578240	-	LOC110732446	--	K01177 beta-amylase [EC:3.2.1.2] | (RefSeq) beta-amylase 3, chloroplastic-like (A)	ko00500: Starch and sucrose metabolism	beta-amylase 3, chloroplastic-like [Chenopodium quinoa]	RecName: Full=Beta-amylase 3, chloroplastic; EC=3.2.1.2; AltName: Full=1,4-alpha-D-glucan maltohydrolase; AltName: Full=Beta-amylase 8; AltName: Full=Chloroplast beta-amylase; Short=CT-BMY; Flags: Precursor;	RecName: Full=Beta-amylase {ECO:0000256|RuleBase:RU000509}; EC=3.2.1.2 {ECO:0000256|RuleBase:RU000509};	--	GO:0009570,chloroplast stroma; GO:0102229,amylopectin maltohydrolase activity; GO:0016161,beta-amylase activity; GO:0000024,maltose biosynthetic process; GO:0009409,response to cold; GO:0005983,starch catabolic process	PF01373.17:Glycosyl hydrolase family 14
gene-LOC110732450	19.63	32.8	53.14	9.45	6.23	12.43	459	723	1031	140	137	258	-1.83034	0.000414448	0.0288352	down	NW_018743175.1	2654855	2656233	-	LOC110732450	--	--	--	M-phase inducer phosphatase-like [Chenopodium quinoa]	RecName: Full=Protein MARD1 {ECO:0000303|PubMed:15159630}; AltName: Full=Mediator of ABA-regulated dormancy1 {ECO:0000303|PubMed:15159630}; AltName: Full=Senescence-associated protein SAG102 {ECO:0000303|PubMed:11402199};	SubName: Full=Uncharacterized protein {ECO:0000313|EMBL:KMT11749.1};	--	GO:0010494,cytoplasmic stress granule; GO:0000932,P-body; GO:0046872,metal ion binding; GO:0009737,response to abscisic acid; GO:0010162,seed dormancy process	PF04570.14:zinc-finger of the FCS-type, C2-C2
gene-LOC110732554	15.97	15.87	9.95	42.28	48.83	82.47	474	444	245	795	1363	2173	2.12905	8.2169e-10	8.45031e-07	up	NW_018743175.1	3801696	3804469	+	LOC110732554	--	--	--	uncharacterized protein LOC110732554 [Chenopodium quinoa]	--	SubName: Full=Uncharacterized protein {ECO:0000313|EMBL:KNA11271.1};	--	--	PF04640.14:PLATZ transcription factor
gene-LOC110732566	2.6	6.58	2.6	5.41	18.58	22.77	223	532	185	294	1498	1733	2.07123	0.000362426	0.0260987	up	NW_018743175.1	3927118	3938228	-	LOC110732566	--	K05658 ATP-binding cassette, subfamily B (MDR/TAP), member 1 [EC:7.6.2.2] | (RefSeq) ABC transporter B family member 2-like (A)	ko02010: ABC transporters	ABC transporter B family member 2-like [Chenopodium quinoa]	RecName: Full=ABC transporter B family member 2; Short=ABC transporter ABCB.2; Short=AtABCB2; AltName: Full=Multidrug resistance protein 2; AltName: Full=P-glycoprotein 2; Flags: Precursor;	SubName: Full=Uncharacterized protein {ECO:0000313|EMBL:KNA20126.1};	Multidrug/pheromone exporter, ABC superfamily	GO:0016021,integral component of membrane; GO:0016020,membrane; GO:0005524,ATP binding; GO:0042626,ATPase activity, coupled to transmembrane movement of substances	PF00664.23:ABC transporter transmembrane region
gene-LOC110732568	45.11	58.47	75.65	14.05	21.35	25.18	654	799	910	129	291	324	-1.49651	4.62236e-05	0.00663927	down	NW_018743175.1	3958706	3964921	+	LOC110732568	--	K12626 U6 snRNA-associated Sm-like protein LSm7 | (RefSeq) sm-like protein LSM7 (A)	ko03018: RNA degradation; ko03040: Spliceosome	sm-like protein LSM7 [Chenopodium quinoa]	RecName: Full=Sm-like protein LSM7 {ECO:0000305}; Short=AtLSM7 {ECO:0000303|PubMed:23620288}; AltName: Full=Protein EMBRYO DEFECTIVE 2816 {ECO:0000305}; AltName: Full=U6 snRNA-associated Sm-like protein LSM7 {ECO:0000305};	SubName: Full=Uncharacterized protein {ECO:0000313|EMBL:KNA20124.1};	Small Nuclear ribonucleoprotein splicing factor	GO:0071013,catalytic step 2 spliceosome; GO:0005737,cytoplasm; GO:1990726,Lsm1-7-Pat1 complex; GO:0097526,spliceosomal tri-snRNP complex; GO:0005689,U12-type spliceosomal complex; GO:0071004,U2-type prespliceosome; GO:0005688,U6 snRNP; GO:0003723,RNA binding; GO:0000398,mRNA splicing, via spliceosome; GO:0000956,nuclear-transcribed mRNA catabolic process; GO:0006396,RNA processing	PF01423.22:LSM domain
gene-LOC110732628	37.25	33.8	56.83	94.81	136.73	239.08	2261	1934	2862	3645	7804	12880	1.91107	3.66908e-06	0.000981674	up	NW_018743175.1	4560799	4563783	+	LOC110732628	--	--	--	--	--	--	--	--	--
gene-LOC110732685	16.29	22.37	13.06	3.2	7.96	6.62	618	800	411	77	284	223	-1.4483	0.000600976	0.0358658	down	NW_018743175.1	5032869	5037120	-	LOC110732685	--	--	--	uncharacterized protein LOC110732685 isoform X1 [Chenopodium quinoa]	--	SubName: Full=Uncharacterized protein {ECO:0000313|EMBL:KNA22311.1};	--	--	--
gene-LOC110732727	35.2	64.79	76.5	17.72	14.67	21.21	574	996	1035	183	225	307	-1.62163	9.38315e-05	0.0102248	down	NW_018743175.1	5445218	5449006	-	LOC110732727	--	--	--	lipid transfer-like protein VAS [Chenopodium quinoa]	--	SubName: Full=Uncharacterized protein {ECO:0000313|EMBL:KNA15713.1};	--	GO:0016021,integral component of membrane	PF14368.6:Probable lipid transfer
gene-LOC110732778	52.81	77.75	78.31	14.75	25.07	32.09	2260	3137	2781	400	1009	1219	-1.47126	1.15811e-05	0.00233818	down	NW_018743175.1	6081187	6083291	-	LOC110732778	--	K22683 aspartyl protease family protein [EC:3.4.23.-] | (RefSeq) aspartyl protease family protein 2-like (A)	--	probable aspartyl protease At4g16563 [Chenopodium quinoa]	RecName: Full=Probable aspartyl protease At4g16563 {ECO:0000305}; EC=3.4.23.- {ECO:0000305}; Flags: Precursor;	SubName: Full=Uncharacterized protein {ECO:0000313|EMBL:KNA13522.1};	Aspartyl protease	GO:0009505,plant-type cell wall; GO:0004190,aspartic-type endopeptidase activity; GO:0030163,protein catabolic process; GO:0006508,proteolysis	PF14541.6:Xylanase inhibitor C-terminal
gene-LOC110732818	2.76	4.15	1.48	4.84	19.69	11.81	81	115	36	90	544	308	2.21391	0.000576667	0.0350861	up	NW_018743175.1	1317719	1319163	+	LOC110732818	--	K01704 3-isopropylmalate/(R)-2-methylmalate dehydratase small subunit [EC:4.2.1.33 4.2.1.35] | (RefSeq) 3-isopropylmalate dehydratase small subunit 3-like (A)	ko00290: Valine, leucine and isoleucine biosynthesis; ko00660: C5-Branched dibasic acid metabolism; ko01210: 2-Oxocarboxylic acid metabolism; ko01230: Biosynthesis of amino acids	3-isopropylmalate dehydratase small subunit 3-like, partial [Chenopodium quinoa]	RecName: Full=3-isopropylmalate dehydratase small subunit 1; EC=4.2.1.33; AltName: Full=AtLEUD1; AltName: Full=Isopropylmalate isomerase small subunit 2; Flags: Precursor;	SubName: Full=Uncharacterized protein {ECO:0000313|EMBL:KNA15416.1};	3-isopropylmalate dehydratase (aconitase superfamily)	GO:0009570,chloroplast stroma; GO:0009536,plastid; GO:0003861,3-isopropylmalate dehydratase activity; GO:0019761,glucosinolate biosynthetic process; GO:0009098,leucine biosynthetic process	PF00694.19:Aconitase C-terminal domain
gene-LOC110732999	4.78	3.55	2.44	8.05	10.59	12.04	283	198	120	302	590	633	1.59172	3.57028e-05	0.00562174	up	NW_018743196.1	795797	800823	+	LOC110732999	--	K01897 long-chain acyl-CoA synthetase [EC:6.2.1.3] | (RefSeq) long chain acyl-CoA synthetase 1-like (A)	ko00061: Fatty acid biosynthesis; ko00071: Fatty acid degradation; ko01212: Fatty acid metabolism; ko04146: Peroxisome	long chain acyl-CoA synthetase 1-like [Chenopodium quinoa]	RecName: Full=Long chain acyl-CoA synthetase 1; EC=6.2.1.3; AltName: Full=Protein ECERIFERUM 8;	SubName: Full=Uncharacterized protein {ECO:0000313|EMBL:KNA19626.1};	Long-chain acyl-CoA synthetases (AMP-forming)	GO:0005783,endoplasmic reticulum; GO:0005524,ATP binding; GO:0102391,decanoate-CoA ligase activity; GO:0004467,long-chain fatty acid-CoA ligase activity; GO:0031957,very long-chain fatty acid-CoA ligase activity; GO:0010143,cutin biosynthetic process; GO:0006631,fatty acid metabolic process; GO:0010025,wax biosynthetic process	PF00501.28:AMP-binding enzyme
gene-LOC110733070	1.5	0.61	0.36	1.3	10.47	12.02	91	35	18	50	599	649	3.27343	0.00016127	0.0147015	up	NW_018743196.1	1570232	1575033	-	LOC110733070	--	--	--	uncharacterized protein LOC110733070 [Chenopodium quinoa]	--	SubName: Full=Uncharacterized protein {ECO:0000313|EMBL:KNA26050.1};	--	GO:0016021,integral component of membrane; GO:0016787,hydrolase activity; GO:0006629,lipid metabolic process	PF01764.25:Lipase (class 3)
gene-LOC110733285	5.07	11.17	8.19	13.61	20.06	29.18	194	403	260	330	722	991	1.44863	0.000394485	0.0276397	up	NW_018743199.1	117593	121071	-	LOC110733285	--	--	--	uncharacterized protein LOC110733285 [Chenopodium quinoa]	--	SubName: Full=Uncharacterized protein {ECO:0000313|EMBL:KNA14247.1};	--	--	PF04720.12:PDDEXK-like family of unknown function
gene-LOC110733317	3.54	4.32	1.53	5.43	10.88	10.32	290	334	104	282	839	751	1.60209	0.000847694	0.0442104	up	NW_018743199.1	532412	541298	+	LOC110733317	--	K17943 pumilio RNA-binding family | (RefSeq) pumilio homolog 1-like (A)	--	pumilio homolog 1-like [Chenopodium quinoa]	RecName: Full=Pumilio homolog 1; Short=APUM-1; Short=AtPUM1;	SubName: Full=Uncharacterized protein {ECO:0000313|EMBL:KNA08358.1};	Translational repressor Pumilio/PUF3 and related RNA-binding proteins (Puf superfamily)	GO:0005737,cytoplasm; GO:0003729,mRNA binding; GO:0006417,regulation of translation	PF07990.12:Nucleic acid binding protein NABP
gene-LOC110733334	54.78	44.7	56.14	136.71	107.27	182.57	1136	874	966	1796	2092	3361	1.53158	1.93796e-06	0.000607394	up	NW_018742206.1	132243	133262	-	LOC110733334	--	K03686 molecular chaperone DnaJ | (RefSeq) uncharacterized protein LOC110703228 isoform X1 (A)	--	chaperone protein dnaJ 11, chloroplastic-like [Chenopodium quinoa]	RecName: Full=Chaperone protein dnaJ 11, chloroplastic; Short=AtDjC11; Short=AtJ11; Flags: Precursor;	SubName: Full=Uncharacterized protein {ECO:0000313|EMBL:KNA20631.1};	Molecular chaperone (DnaJ superfamily)	GO:0009507,chloroplast; GO:0009570,chloroplast stroma; GO:0005634,nucleus; GO:0009536,plastid	PF00226.31:DnaJ domain
gene-LOC110733417	38.88	85.8	60.63	135.34	146.54	166.57	1517	3156	1963	3345	5377	5769	1.39372	1.54896e-05	0.00296365	up	NW_018743199.1	1898485	1900403	-	LOC110733417	--	--	--	nematode resistance protein-like HSPRO2 [Chenopodium quinoa]	RecName: Full=Nematode resistance protein-like HSPRO2; AltName: Full=AKINbetagamma-interacting protein 2; AltName: Full=Ortholog of sugar beet HS1 PRO-1 protein 2; AltName: Full=Protein Hs1pro-2;	SubName: Full=Uncharacterized protein {ECO:0000313|EMBL:KNA14567.1};	--	GO:0005737,cytoplasm; GO:0020037,heme binding; GO:0046872,metal ion binding; GO:0009816,defense response to bacterium, incompatible interaction; GO:0006979,response to oxidative stress; GO:0009751,response to salicylic acid; GO:0019441,tryptophan catabolic process to kynurenine	PF07014.12:Hs1pro-1 protein C-terminus
gene-LOC110733441	0.69	1.6	0.74	1.41	7.38	14.81	35	76	31	45	350	663	2.99948	0.000162558	0.0147373	up	NW_018743199.1	2169731	2174586	+	LOC110733441	--	K05857 phosphatidylinositol phospholipase C, delta [EC:3.1.4.11] | (RefSeq) phosphoinositide phospholipase C 6-like (A)	ko00562: Inositol phosphate metabolism; ko04070: Phosphatidylinositol signaling system	phosphoinositide phospholipase C 6-like [Chenopodium quinoa]	RecName: Full=Phosphoinositide phospholipase C 6; EC=3.1.4.11; AltName: Full=Phosphoinositide phospholipase PLC6; Short=AtPLC6; Short=AtPLC8; Short=PI-PLC6;	RecName: Full=Phosphoinositide phospholipase C {ECO:0000256|RuleBase:RU361133}; EC=3.1.4.11 {ECO:0000256|RuleBase:RU361133};	Phosphoinositide-specific phospholipase C	GO:0005622,intracellular; GO:0005886,plasma membrane; GO:0004435,phosphatidylinositol phospholipase C activity; GO:0004871,NA; GO:0035556,intracellular signal transduction; GO:0016042,lipid catabolic process	PF00388.19:Phosphatidylinositol-specific phospholipase C, X domain
gene-LOC110733512	0.93	0.46	0.24	5.08	6.65	11	32	15	7	111	216	337	3.8441	5.0736e-09	4.17418e-06	up	NW_018743199.1	2942150	2944174	+	LOC110733512	--	--	--	uncharacterized protein LOC110733512 [Chenopodium quinoa]	--	SubName: Full=Uncharacterized protein {ECO:0000313|EMBL:KMS99454.1};	--	--	--
gene-LOC110733516	12.39	13.15	16.41	16.71	56.83	103.25	192	192	211	164	828	1420	2.08312	0.000542022	0.033783	up	NW_018743199.1	3000151	3001002	+	LOC110733516	--	--	--	polyadenylate-binding protein-interacting protein 2-like [Chenopodium quinoa]	RecName: Full=Polyadenylate-binding protein-interacting protein 2; Short=PABP-interacting protein 2; Short=Poly(A)-binding protein-interacting protein 2; AltName: Full=PAM2-containing protein CID2; AltName: Full=Protein CTC-INTERACTING DOMAIN 2;	SubName: Full=Uncharacterized protein {ECO:0000313|EMBL:KNA18937.1};	--	--	PF07145.15:Ataxin-2 C-terminal region
gene-LOC110733732	67.85	61	49.09	124.03	212.02	229.02	538	456	323	623	1581	1612	1.73908	2.86802e-08	1.81507e-05	up	NW_018743199.1	4623937	4624326	+	LOC110733732	--	--	--	uncharacterized protein LOC110733732 [Chenopodium quinoa]	--	SubName: Full=Uncharacterized protein {ECO:0000313|EMBL:KNA24836.1};	--	--	--
gene-LOC110733847	1.14	1.72	0.54	3.18	6.4	6.28	43	61	17	76	227	210	2.32347	8.50048e-05	0.00959977	up	NW_018743204.1	1233700	1237393	-	LOC110733847	--	K13430 serine/threonine-protein kinase PBS1 [EC:2.7.11.1] | (RefSeq) serine/threonine-protein kinase PBS1-like (A)	ko04626: Plant-pathogen interaction	serine/threonine-protein kinase RIPK-like [Chenopodium quinoa]	RecName: Full=Serine/threonine-protein kinase RIPK {ECO:0000305}; EC=2.7.11.1 {ECO:0000305|PubMed:21320696}; AltName: Full=ACIK1A/PBL14; AltName: Full=ACRE protein ortholog 264A {ECO:0000305}; Short=AtACRE264a {ECO:0000303|PubMed:15181213}; AltName: Full=PBS1-like protein 14 {ECO:0000303|PubMed:20413097}; AltName: Full=RPM1-induced protein kinase {ECO:0000303|PubMed:21320696};	SubName: Full=Uncharacterized protein {ECO:0000313|EMBL:KMS96228.1};	Serine/threonine protein kinase	GO:0005886,plasma membrane; GO:0005524,ATP binding; GO:0004674,protein serine/threonine kinase activity; GO:0004675,transmembrane receptor protein serine/threonine kinase activity; GO:0007166,cell surface receptor signaling pathway; GO:0042742,defense response to bacterium; GO:0006468,protein phosphorylation	PF07714.17:Protein tyrosine kinase
gene-LOC110733855	6.49	17.04	31.54	1.59	1.34	1.65	310	767	1250	48	60	70	-3.50063	2.59764e-08	1.70972e-05	down	NW_018743204.1	1421043	1427127	-	LOC110733855	--	--	--	--	--	--	--	--	--
gene-LOC110733887	36.02	39.3	53.44	18.64	15.79	16.3	662	681	815	217	273	266	-1.24066	0.000722986	0.0400551	down	NW_018743204.1	2462047	2466985	+	LOC110733887	--	--	--	uncharacterized protein At5g01610-like [Chenopodium quinoa]	RecName: Full=Uncharacterized protein At5g01610;	SubName: Full=Uncharacterized protein {ECO:0000313|EMBL:KNA06260.1};	--	--	PF04398.12:Protein of unknown function, DUF538
gene-LOC110734233	10.29	15.21	22.38	4.67	4.65	6.31	292	407	527	84	124	159	-1.53529	0.000679432	0.0383104	down	NW_018743212.1	602594	605440	-	LOC110734233	--	--	--	uncharacterized protein LOC110734233 isoform X1 [Chenopodium quinoa]	--	SubName: Full=Uncharacterized protein {ECO:0000313|EMBL:KNA19607.1};	--	--	PF06108.12:Protein of unknown function (DUF952)
gene-LOC110734270	3.97	5	2.8	7.54	12.58	9.96	330	392	193	397	984	735	1.46145	2.428e-05	0.00420543	up	NW_018743212.1	1060390	1066817	-	LOC110734270	--	K17710 pentatricopeptide repeat domain-containing protein 1 | (RefSeq) pentatricopeptide repeat-containing protein At2g18940, chloroplastic-like (A)	--	pentatricopeptide repeat-containing protein At2g31400, chloroplastic-like [Chenopodium quinoa]	RecName: Full=Pentatricopeptide repeat-containing protein At2g31400, chloroplastic; Flags: Precursor;	SubName: Full=Uncharacterized protein {ECO:0000313|EMBL:KNA23161.1};	FOG: PPR repeat	GO:0009507,chloroplast; GO:0003677,DNA binding; GO:0004519,endonuclease activity; GO:0003723,RNA binding; GO:0010019,chloroplast-nucleus signaling pathway; GO:0031930,mitochondria-nucleus signaling pathway; GO:0009451,RNA modification	PF13041.6:PPR repeat family
gene-LOC110734453	37.48	37.59	41.01	18.76	14.73	18.85	1066	1008	968	338	394	476	-1.04837	0.000426745	0.029197	down	NW_018743212.1	3237155	3240028	+	LOC110734453	--	--	--	BI1-like protein [Chenopodium quinoa]	RecName: Full=Protein LIFEGUARD 4 {ECO:0000303|PubMed:23888068}; Short=AtLFG4 {ECO:0000303|PubMed:23888068};	SubName: Full=Uncharacterized protein {ECO:0000313|EMBL:KNA05528.1};	N-methyl-D-aspartate receptor glutamate-binding subunit	GO:0016021,integral component of membrane	PF01027.20:Inhibitor of apoptosis-promoting Bax1
gene-LOC110734454	0.39	0.46	0.2	0.76	1.75	3.59	26	29	11	32	110	213	2.58339	0.00058158	0.0351178	up	NW_018743212.1	3270581	3277523	-	LOC110734454	--	K08857 NIMA (never in mitosis gene a)-related kinase 1/4/5 [EC:2.7.11.1] | (RefSeq) serine/threonine-protein kinase Nek2-like (A)	--	serine/threonine-protein kinase Nek2-like [Chenopodium quinoa]	RecName: Full=Serine/threonine-protein kinase Nek2; Short=OsNek2; EC=2.7.11.1; AltName: Full=NimA-related protein kinase 2;	SubName: Full=Uncharacterized protein {ECO:0000313|EMBL:KNA05533.1};	Serine/threonine protein kinase	GO:0005524,ATP binding; GO:0004674,protein serine/threonine kinase activity	PF00069.25:Protein kinase domain
gene-LOC110734484	35.25	42.68	49.85	11.5	10.82	10.74	658	751	772	136	190	178	-1.84637	3.08002e-08	1.91246e-05	down	NW_018743212.1	3916184	3917101	+	LOC110734484	--	K21891 calcium load-activated calcium channel | (RefSeq) calcium load-activated calcium channel-like (A)	--	calcium load-activated calcium channel-like [Chenopodium quinoa]	--	RecName: Full=Calcium load-activated calcium channel {ECO:0000256|PIRNR:PIRNR023322}; Short=CLAC channel {ECO:0000256|PIRNR:PIRNR023322};	Predicted membrane protein	GO:0030176,integral component of endoplasmic reticulum membrane; GO:0005262,calcium channel activity; GO:0032469,endoplasmic reticulum calcium ion homeostasis	PF01956.16:Integral membrane protein EMC3/TMCO1-like
gene-LOC110735133	31.11	48.78	69.66	8.55	17.03	15.63	408	603	758	71	210	182	-1.79095	0.000147447	0.0139035	down	NW_018743252.1	7079013	7083737	-	LOC110735133	--	K03009 DNA-directed RNA polymerases I, II, and III subunit RPABC4 | (RefSeq) DNA-directed RNA polymerases II, IV and V subunit 12 (A)	ko03020: RNA polymerase	PREDICTED: DNA-directed RNA polymerases II, IV and V subunit 12 [Vitis vinifera]	RecName: Full=DNA-directed RNA polymerases II, IV and V subunit 12; AltName: Full=DNA-directed RNA Polymerase II subunit K;	SubName: Full=Uncharacterized protein {ECO:0000313|EMBL:KNA18575.1};	DNA-directed RNA polymerase, subunit RPB7.0	GO:0005736,RNA polymerase I complex; GO:0005665,RNA polymerase II, core complex; GO:0005666,RNA polymerase III complex; GO:0000418,RNA polymerase IV complex; GO:0000419,RNA polymerase V complex; GO:0003677,DNA binding; GO:0003899,DNA-directed 5'-3' RNA polymerase activity; GO:0046872,metal ion binding; GO:0006360,transcription by RNA polymerase I; GO:0006366,transcription by RNA polymerase II; GO…	PF03604.13:DNA directed RNA polymerase, 7 kDa subunit
gene-LOC110735137	11.23	12.45	16.21	3.42	3.64	5.69	420	439	503	81	128	189	-1.57647	3.04755e-05	0.00494049	down	NW_018743252.1	7122640	7128633	-	LOC110735137	--	--	--	uncharacterized protein LOC110735137 [Chenopodium quinoa]	--	SubName: Full=Uncharacterized protein {ECO:0000313|EMBL:KNA03037.1};	Predicted lipase/calmodulin-binding heat-shock protein	GO:0016787,hydrolase activity; GO:0016042,lipid catabolic process	PF01764.25:Lipase (class 3)
gene-LOC110735188	7.43	10.93	12.89	10.97	46.81	66.33	246	341	354	230	1457	1949	2.01056	0.000855969	0.0443608	up	NW_018743252.1	9253593	9262543	+	LOC110735188	--	--	--	GDSL esterase/lipase EXL3-like [Chenopodium quinoa]	RecName: Full=GDSL esterase/lipase EXL3; EC=3.1.1.-; AltName: Full=Family II extracellular lipase 3; Short=Family II lipase EXL3; Flags: Precursor;	SubName: Full=Uncharacterized protein {ECO:0000313|EMBL:KNA16355.1};	--	GO:0005576,extracellular region; GO:0016298,lipase activity; GO:0016042,lipid catabolic process	PF00657.22:GDSL-like Lipase/Acylhydrolase
gene-LOC110735356	36.77	37.68	17.28	59.6	61.44	105.08	2664	2573	1039	2735	4186	6757	1.39005	0.000327934	0.0243238	up	NW_018743280.1	50914	59624	-	LOC110735356	--	K01595 phosphoenolpyruvate carboxylase [EC:4.1.1.31] | (RefSeq) phosphoenolpyruvate carboxylase 2 (A)	ko00620: Pyruvate metabolism; ko00710: Carbon fixation in photosynthetic organisms; ko01200: Carbon metabolism	phosphoenolpyruvate carboxylase 2 [Chenopodium quinoa]	RecName: Full=Phosphoenolpyruvate carboxylase 2; Short=PEPC 2; Short=PEPCase 2; EC=4.1.1.31;	SubName: Full=Uncharacterized protein {ECO:0000313|EMBL:KNA08285.1};	--	GO:0005737,cytoplasm; GO:0008964,phosphoenolpyruvate carboxylase activity; GO:0015977,carbon fixation; GO:0015979,photosynthesis; GO:0006099,tricarboxylic acid cycle	PF00311.17:Phosphoenolpyruvate carboxylase
gene-LOC110735732	11.7	23.94	9.88	5.06	2.39	3.74	307	592	215	84	59	87	-1.86108	0.000744363	0.0408952	down	NW_018743285.1	2867966	2869255	-	LOC110735732	--	K22736 vacuolar iron transporter family protein | (RefSeq) vacuolar iron transporter homolog 1-like (A)	--	vacuolar iron transporter homolog 1-like [Chenopodium quinoa]	RecName: Full=Vacuolar iron transporter homolog 1; AltName: Full=Protein NODULIN-LIKE 1;	SubName: Full=VIT1 domain-containing protein {ECO:0000313|EMBL:GAV90381.1};	Uncharacterized membrane protein	GO:0016021,integral component of membrane; GO:0016020,membrane; GO:0005774,vacuolar membrane; GO:0005381,iron ion transmembrane transporter activity; GO:0005384,manganese ion transmembrane transporter activity; GO:0030026,cellular manganese ion homeostasis; GO:0071369,cellular response to ethylene stimulus; GO:0071281,cellular response to iron ion; GO:0071732,cellular response to nitric oxide; GO…	PF01988.19:VIT family
gene-LOC110736181	0	0.03	0	1.1	3.08	8.75	0	1	0	28	116	311	8.79535	1.12311e-08	8.40006e-06	up	NW_018743292.1	904667	906636	+	LOC110736181	--	K13420 LRR receptor-like serine/threonine-protein kinase FLS2 [EC:2.7.11.1] | (RefSeq) LRR receptor-like serine/threonine-protein kinase FLS2 (A)	ko04016: MAPK signaling pathway - plant; ko04626: Plant-pathogen interaction	DNA damage-repair/toleration protein DRT100-like [Chenopodium quinoa]	RecName: Full=DNA damage-repair/toleration protein DRT100; Flags: Precursor;	SubName: Full=Uncharacterized protein {ECO:0000313|EMBL:KNA25822.1};	FOG: Leucine rich repeat	GO:0009507,chloroplast; GO:0000166,nucleotide binding; GO:0006281,DNA repair	PF13855.6:Leucine rich repeat
gene-LOC110736283	0.68	0.81	0.77	1.69	1.68	2.26	60	67	56	94	139	176	1.40864	0.000492181	0.0319739	up	NW_018743292.1	1942931	1950004	-	LOC110736283	--	--	--	uncharacterized protein LOC110736283 [Chenopodium quinoa]	RecName: Full=PH, RCC1 and FYVE domains-containing protein 1 {ECO:0000303|PubMed:11563980}; AltName: Full=Protein Praf4 {ECO:0000303|PubMed:15358268};	SubName: Full=Uncharacterized protein {ECO:0000313|EMBL:KNA22613.1};	--	GO:0046872,metal ion binding; GO:0070300,phosphatidic acid binding; GO:0035091,phosphatidylinositol binding; GO:0017112,Rab guanyl-nucleotide exchange factor activity	PF00415.18:Regulator of chromosome condensation (RCC1) repeat
gene-LOC110736340	11.66	20.47	164.33	5.62	0.44	2.35	252	417	2947	77	9	45	-4.42899	7.13841e-05	0.00866855	down	NW_018743292.1	2452164	2453707	+	LOC110736340	--	--	--	uncharacterized protein LOC110736340 [Chenopodium quinoa]	--	SubName: Full=Uncharacterized protein {ECO:0000313|EMBL:KMS97965.1};	--	--	--
gene-LOC110736499	20.53	32.75	22.79	56.45	40.1	55.46	853	1283	786	1486	1567	2046	1.12675	0.000345004	0.0251205	up	NW_018743292.1	4085613	4087656	-	LOC110736499	--	K05953 nicotianamine synthase [EC:2.5.1.43] | (RefSeq) nicotianamine synthase-like (A)	--	nicotianamine synthase-like [Chenopodium quinoa]	RecName: Full=Nicotianamine synthase; EC=2.5.1.43; AltName: Full=Chloronerva; AltName: Full=S-adenosyl-L-methionine:S-adenosyl-L-methionine:S-adenosyl-methionine 3-amino-3-carboxypropyltransferase;	SubName: Full=Uncharacterized protein {ECO:0000313|EMBL:KNA06923.1};	--	GO:0030410,nicotianamine synthase activity; GO:0030418,nicotianamine biosynthetic process	PF03059.16:Nicotianamine synthase protein
gene-LOC110736655	3.82	2.51	0.98	2.42	50.88	42.89	192	119	41	77	2407	1915	3.74256	3.91547e-05	0.00596546	up	NW_018743292.1	5904120	5924673	+	LOC110736655	--	K02433 aspartyl-tRNA(Asn)/glutamyl-tRNA(Gln) amidotransferase subunit A [EC:6.3.5.6 6.3.5.7] | (RefSeq) glutamyl-tRNA(Gln) amidotransferase subunit A, chloroplastic/mitochondrial-like (A)	ko00970: Aminoacyl-tRNA biosynthesis	fatty acid amide hydrolase-like isoform X1 [Chenopodium quinoa]	RecName: Full=Fatty acid amide hydrolase; EC=3.5.1.99; AltName: Full=N-acylethanolamine amidohydrolase;	SubName: Full=Uncharacterized protein {ECO:0000313|EMBL:KNA09458.1};	Amidases	GO:0005783,endoplasmic reticulum; GO:0005789,endoplasmic reticulum membrane; GO:0005794,Golgi apparatus; GO:0016021,integral component of membrane; GO:0005886,plasma membrane; GO:0005774,vacuolar membrane; GO:0005773,vacuole; GO:0004040,amidase activity; GO:0103073,anandamide amidohydrolase activity; GO:0047412,N-(long-chain-acyl)ethanolamine deacylase activity; GO:0102077,oleamide hydrolase acti…	PF01425.21:Amidase
gene-LOC110736964	5.21	5.61	4.91	8.74	12.57	10.59	271	275	212	288	615	489	1.11751	0.000108393	0.0113602	up	NW_018743292.1	10322962	10327009	-	LOC110736964	--	K13430 serine/threonine-protein kinase PBS1 [EC:2.7.11.1] | (RefSeq) serine/threonine-protein kinase PBS1-like (A)	ko04626: Plant-pathogen interaction	probable serine/threonine-protein kinase PBL7 isoform X1 [Chenopodium quinoa]	RecName: Full=Probable serine/threonine-protein kinase PBL7 {ECO:0000305}; EC=2.7.11.1 {ECO:0000269|PubMed:21855796}; AltName: Full=CDG1-like protein 1 {ECO:0000303|PubMed:21855796}; AltName: Full=PBS1-like protein 7 {ECO:0000303|PubMed:20413097};	SubName: Full=Uncharacterized protein {ECO:0000313|EMBL:KNA12014.1};	Serine/threonine protein kinase	GO:0005886,plasma membrane; GO:0005524,ATP binding; GO:0004675,transmembrane receptor protein serine/threonine kinase activity; GO:0009742,brassinosteroid mediated signaling pathway; GO:0007166,cell surface receptor signaling pathway; GO:1900459,positive regulation of brassinosteroid mediated signaling pathway; GO:0006468,protein phosphorylation	PF07714.17:Protein tyrosine kinase
gene-LOC110737120	11.78	17.09	28.44	4.06	5.93	8.01	444	607	889	97	210	268	-1.61564	0.000727329	0.0401785	down	NW_018743292.1	12807656	12809508	-	LOC110737120	--	--	--	BSD domain-containing protein 1-like [Chenopodium quinoa]	--	SubName: Full=Uncharacterized protein {ECO:0000313|EMBL:KNA03690.1};	Uncharacterized conserved protein, contains BSD domain	--	PF03909.17:BSD domain
gene-LOC110737347	8.94	1.86	1.13	16.48	48.51	54.98	143	28	15	167	730	781	3.34074	7.9703e-05	0.00930123	up	NW_018743327.1	4058112	4060103	-	LOC110737347	--	K03094 S-phase kinase-associated protein 1 | (RefSeq) SKP1-like protein 1A (A)	ko04120: Ubiquitin mediated proteolysis; ko04141: Protein processing in endoplasmic reticulum	SKP1-like protein 1A [Chenopodium quinoa]	RecName: Full=SKP1-like protein 4; Short=AtSK4;	SubName: Full=SKP1 component {ECO:0000313|EMBL:OMO97849.1};	SCF ubiquitin ligase, Skp1 component	GO:0005737,cytoplasm; GO:0005730,nucleolus; GO:0005634,nucleus; GO:0019005,SCF ubiquitin ligase complex; GO:0016567,protein ubiquitination; GO:0006511,ubiquitin-dependent protein catabolic process	PF01466.19:Skp1 family, dimerisation domain
gene-LOC110737668	21.55	16.88	27.39	3.82	8.36	8.39	677	500	714	76	247	234	-1.63112	0.000238107	0.0191586	down	NW_018743331.1	687504	699156	-	LOC110737668	--	K00074 3-hydroxybutyryl-CoA dehydrogenase [EC:1.1.1.157] | (RefSeq) uncharacterized protein LOC110737668 (A)	ko00360: Phenylalanine metabolism; ko00650: Butanoate metabolism; ko01200: Carbon metabolism	uncharacterized protein LOC110737668 [Chenopodium quinoa]	RecName: Full=Peroxisomal fatty acid beta-oxidation multifunctional protein; Short=MFP; Includes: RecName: Full=Enoyl-CoA hydratase/3-2-trans-enoyl-CoA isomerase/3-hydroxybutyryl-CoA epimerase; EC=4.2.1.17; EC=5.1.2.3; EC=5.3.3.8; Includes: RecName: Full=3-hydroxyacyl-CoA dehydrogenase; EC=1.1.1.35;	SubName: Full=Uncharacterized protein {ECO:0000313|EMBL:EMJ12899.1};	3-hydroxyacyl-CoA dehydrogenase	GO:0005874,microtubule; GO:0005777,peroxisome; GO:0018812,3-hydroxyacyl-CoA dehydratase activity; GO:0003857,3-hydroxyacyl-CoA dehydrogenase activity; GO:0008692,3-hydroxybutyryl-CoA epimerase activity; GO:0004165,dodecenoyl-CoA delta-isomerase activity; GO:0004300,enoyl-CoA hydratase activity; GO:0008017,microtubule binding; GO:0003729,mRNA binding; GO:0006635,fatty acid beta-oxidation	PF02737.18:3-hydroxyacyl-CoA dehydrogenase, NAD binding domain
gene-LOC110737740	10.06	6.87	17.58	1.44	2.02	1.98	407	262	590	37	77	71	-2.60846	1.17104e-06	0.000405661	down	NW_018743331.1	2150359	2157114	+	LOC110737740	--	K00451 homogentisate 1,2-dioxygenase [EC:1.13.11.5] | (RefSeq) homogentisate 1,2-dioxygenase-like isoform X1 (A)	ko00350: Tyrosine metabolism	homogentisate 1,2-dioxygenase-like isoform X1 [Chenopodium quinoa]	RecName: Full=Homogentisate 1,2-dioxygenase; EC=1.13.11.5; AltName: Full=Homogentisate oxygenase; AltName: Full=Homogentisic acid oxidase; AltName: Full=Homogentisicase;	SubName: Full=Uncharacterized protein {ECO:0000313|EMBL:KNA10783.1};	Homogentisate 1,2-dioxygenase	GO:0005829,cytosol; GO:0004411,homogentisate 1,2-dioxygenase activity; GO:0046872,metal ion binding; GO:1902000,homogentisate catabolic process; GO:0006559,L-phenylalanine catabolic process; GO:0006572,tyrosine catabolic process	PF04209.13:homogentisate 1,2-dioxygenase
gene-LOC110737851	18.67	19.57	31.71	8.25	7.3	8.73	511	505	720	143	188	212	-1.44052	0.000394744	0.0276397	down	NW_018743331.1	6904181	6910496	-	LOC110737851	--	K00472 prolyl 4-hydroxylase [EC:1.14.11.2] | (RefSeq) probable prolyl 4-hydroxylase 4 (A)	ko00330: Arginine and proline metabolism	probable prolyl 4-hydroxylase 4 [Chenopodium quinoa]	RecName: Full=Probable prolyl 4-hydroxylase 4 {ECO:0000305}; Short=AtP4H4 {ECO:0000303|Ref.5}; EC=1.14.11.2 {ECO:0000305};	SubName: Full=Uncharacterized protein {ECO:0000313|EMBL:KNA07276.1};	Prolyl 4-hydroxylase alpha subunit	GO:0005737,cytoplasm; GO:0005783,endoplasmic reticulum; GO:0005789,endoplasmic reticulum membrane; GO:0005794,Golgi apparatus; GO:0016021,integral component of membrane; GO:0005634,nucleus; GO:0005506,iron ion binding; GO:0031418,L-ascorbic acid binding; GO:0004656,procollagen-proline 4-dioxygenase activity	PF13640.6:2OG-Fe(II) oxygenase superfamily
gene-LOC110737965	11.59	19.29	15.2	5.11	4.79	5.95	283	444	308	79	110	129	-1.42948	5.82773e-05	0.00769768	down	NW_018742244.1	43850	45651	+	LOC110737965	--	--	--	nicotinamidase 1-like [Chenopodium quinoa]	RecName: Full=Nicotinamidase 1 {ECO:0000305}; Short=AtNIC1 {ECO:0000303|PubMed:17335512}; EC=3.5.1.19 {ECO:0000269|PubMed:17335512}; AltName: Full=Nicotinamide deamidase 1;	SubName: Full=Uncharacterized protein {ECO:0000313|EMBL:KNA10329.1};	--	GO:0005737,cytoplasm; GO:0008936,nicotinamidase activity; GO:0006769,nicotinamide metabolic process; GO:0019365,pyridine nucleotide salvage; GO:0009737,response to abscisic acid	PF00857.20:Isochorismatase family
gene-LOC110738055	3.96	11.79	9.98	21.71	26.41	23.02	99	278	207	344	621	511	1.59198	0.000905402	0.0461237	up	NW_018743363.1	114391	115620	-	LOC110738055	--	K09286 EREBP-like factor | (RefSeq) ethylene-responsive transcription factor ERF023-like (A)	--	ethylene-responsive transcription factor ERF017-like [Chenopodium quinoa]	RecName: Full=Ethylene-responsive transcription factor ERF017;	SubName: Full=Uncharacterized protein {ECO:0000313|EMBL:KNA07212.1};	--	GO:0005634,nucleus; GO:0003677,DNA binding; GO:0003700,DNA-binding transcription factor activity; GO:0009873,ethylene-activated signaling pathway; GO:0006351,transcription, DNA-templated	PF00847.20:AP2 domain
gene-LOC110738062	33.54	30.03	46.45	8.82	10.31	14.83	744	628	855	124	215	292	-1.63622	1.20099e-05	0.00239536	down	NW_018743363.1	251273	255298	+	LOC110738062	--	K07953 GTP-binding protein SAR1 [EC:3.6.5.-] | (RefSeq) GTP-binding protein SAR1A-like (A)	ko04141: Protein processing in endoplasmic reticulum	GTP-binding protein SAR1A-like [Chenopodium quinoa]	RecName: Full=GTP-binding protein SAR1A;	SubName: Full=Uncharacterized protein {ECO:0000313|EMBL:KNA15841.1};	Vesicle coat complex COPII, GTPase subunit SAR1	GO:0005783,endoplasmic reticulum; GO:0005794,Golgi apparatus; GO:0005886,plasma membrane; GO:0005525,GTP binding; GO:0006886,intracellular protein transport; GO:0016192,vesicle-mediated transport	PF00025.21:ADP-ribosylation factor family
gene-LOC110738133	3.26	2.79	0.94	20.17	14.41	17.51	46	37	11	180	191	219	3.02236	8.12242e-07	0.000303751	up	NW_018743373.1	1294142	1295553	-	LOC110738133	--	--	--	stress-response A/B barrel domain-containing protein At5g22580-like [Chenopodium quinoa]	RecName: Full=Stress-response A/B barrel domain-containing protein At5g22580 {ECO:0000305}; AltName: Full=Uncharacterized protein At5g22580;	SubName: Full=Uncharacterized protein {ECO:0000313|EMBL:KNA05671.1};	--	GO:0009507,chloroplast; GO:0046872,metal ion binding	PF07876.12:Stress responsive A/B Barrel Domain
gene-LOC110738425	10.09	20.84	31.69	3.23	2.34	3.09	803	1564	2093	163	175	218	-2.75203	5.81322e-08	3.35627e-05	down	NW_018743389.1	2840664	2845825	-	LOC110738425	--	--	--	--	--	--	--	--	--
gene-LOC110738631	9.47	9.22	8.61	10.1	39.29	63.85	459	421	346	310	1790	2746	2.06824	0.000330175	0.0243238	up	NW_018743391.1	590903	596497	-	LOC110738631	--	K00297 methylenetetrahydrofolate reductase (NADPH) [EC:1.5.1.20] | (RefSeq) methylenetetrahydrofolate reductase 2-like (A)	ko00670: One carbon pool by folate; ko01200: Carbon metabolism	methylenetetrahydrofolate reductase 2-like [Chenopodium quinoa]	RecName: Full=Methylenetetrahydrofolate reductase 2; Short=AtMTHFR2; EC=1.5.1.20;	RecName: Full=Methylenetetrahydrofolate reductase {ECO:0000256|RuleBase:RU003862}; EC=1.5.1.20 {ECO:0000256|RuleBase:RU003862};	5,10-methylenetetrahydrofolate reductase	GO:0005829,cytosol; GO:0004489,methylenetetrahydrofolate reductase (NAD(P)H) activity; GO:0006555,methionine metabolic process; GO:0006730,one-carbon metabolic process; GO:0035999,tetrahydrofolate interconversion	PF02219.17:Methylenetetrahydrofolate reductase
gene-LOC110738735	27.51	24.73	43.4	6.53	11.46	12.21	472	400	618	71	185	186	-1.60917	0.000291446	0.0225676	down	NW_018743391.1	2298158	2302000	-	LOC110738735	--	--	--	selenoprotein F-like [Chenopodium quinoa]	--	SubName: Full=Uncharacterized protein {ECO:0000313|EMBL:KNA12801.1};	Selenoprotein	--	PF08806.11:Sep15/SelM redox domain
gene-LOC110738837	4.74	5.78	2.93	6.96	13.32	11.63	347	399	178	323	917	756	1.34373	0.000509389	0.0324874	up	NW_018743397.1	82120	86984	-	LOC110738837	--	K14293 importin subunit beta-1 | (RefSeq) importin subunit beta-1-like (A)	ko03013: RNA transport	importin subunit beta-1-like [Chenopodium quinoa]	RecName: Full=Importin subunit beta-1 {ECO:0000305}; AltName: Full=Karyopherin subunit beta-1; Short=ATKPNB1 {ECO:0000303|PubMed:23582042};	SubName: Full=Uncharacterized protein {ECO:0000313|EMBL:KNA25481.1};	Karyopherin (importin) beta 1	GO:0009507,chloroplast; GO:0005737,cytoplasm; GO:0031965,nuclear membrane; GO:0034399,nuclear periphery; GO:0005634,nucleus; GO:0008139,nuclear localization sequence binding; GO:0008565,protein transporter activity; GO:0008536,Ran GTPase binding; GO:0006607,NLS-bearing protein import into nucleus; GO:0006606,protein import into nucleus; GO:0000060,protein import into nucleus, translocation; GO:00…	PF02985.22:HEAT repeat
gene-LOC110738856	0.75	1.71	1.34	4.37	6.99	7.73	21	45	31	77	183	191	2.42138	4.76796e-06	0.00119778	up	NW_018743397.1	233609	235401	+	LOC110738856	--	K13457 disease resistance protein RPM1 | (RefSeq) disease resistance protein RPM1-like (A)	ko04626: Plant-pathogen interaction	disease resistance protein RGA2-like [Chenopodium quinoa]	RecName: Full=Disease resistance protein RGA2; AltName: Full=Blight resistance protein RPI; AltName: Full=RGA2-blb;	SubName: Full=Uncharacterized protein {ECO:0000313|EMBL:KNA19706.1};	Apoptotic ATPase	GO:0043531,ADP binding; GO:0005524,ATP binding; GO:0006952,defense response	PF00931.22:NB-ARC domain
gene-LOC110738939	9.22	8.95	18.76	2	1.87	3.52	189	173	319	26	36	64	-2.27257	9.92846e-05	0.0106429	down	NW_018742244.1	1172172	1174054	+	LOC110738939	--	--	--	uncharacterized protein LOC110738939 [Chenopodium quinoa]	--	SubName: Full=Uncharacterized protein {ECO:0000313|EMBL:KNA18074.1};	--	--	PF16101.5:Proline-rich membrane anchor 1
gene-LOC110739071	8.14	15.31	22.06	1.73	1.76	2.66	461	818	1037	62	94	134	-2.81063	7.08132e-09	5.54855e-06	down	NW_018743429.1	1580	7503	-	LOC110739071	--	K14638 solute carrier family 15 (peptide/histidine transporter), member 3/4 | (RefSeq) protein NRT1/ PTR FAMILY 8.1-like (A)	--	protein NRT1/ PTR FAMILY 8.1-like [Chenopodium quinoa]	RecName: Full=Protein NRT1/ PTR FAMILY 8.1; Short=AtNPF8.1; AltName: Full=Peptide transporter PTR1;	SubName: Full=Uncharacterized protein {ECO:0000313|EMBL:KNA05297.1};	H+/oligopeptide symporter	GO:0016021,integral component of membrane; GO:0005886,plasma membrane; GO:0009506,plasmodesma; GO:0042936,NA; GO:0022857,transmembrane transporter activity; GO:0042937,tripeptide transmembrane transporter activity; GO:0042938,dipeptide transport; GO:0006807,nitrogen compound metabolic process; GO:0015031,protein transport; GO:0042939,tripeptide transport	PF00854.21:POT family
gene-LOC110739385	72.46	64.74	74.16	32.36	27.85	34.19	1566	1319	1330	443	566	656	-1.06848	0.000156303	0.0144856	down	NW_018743476.1	629119	657293	-	LOC110739385	--	K13237 peroxisomal 2,4-dienoyl-CoA reductase [EC:1.3.1.34] | (RefSeq) peroxisomal 2,4-dienoyl-CoA reductase-like isoform X1 (A)	ko04146: Peroxisome	peroxisomal 2,4-dienoyl-CoA reductase-like isoform X1 [Chenopodium quinoa]	RecName: Full=Peroxisomal 2,4-dienoyl-CoA reductase; EC=1.3.1.34;	SubName: Full=Uncharacterized protein {ECO:0000313|EMBL:KNA25348.1};	Reductases with broad range of substrate specificities	GO:0005777,peroxisome; GO:0005774,vacuolar membrane; GO:0008670,2,4-dienoyl-CoA reductase (NADPH) activity; GO:0006631,fatty acid metabolic process	PF13561.6:Enoyl-(Acyl carrier protein) reductase
gene-LOC110739401	23.49	25.1	26.94	8.96	12.33	11.9	683	688	650	165	337	307	-1.09944	6.81274e-05	0.00852473	down	NW_018743476.1	2775459	2785875	-	LOC110739401	--	K19706 dihydroceramide fatty acyl 2-hydroxylase [EC:1.14.18.7] | (RefSeq) dihydroceramide fatty acyl 2-hydroxylase FAH1-like (A)	--	dihydroceramide fatty acyl 2-hydroxylase FAH1-like [Chenopodium quinoa]	RecName: Full=Dihydroceramide fatty acyl 2-hydroxylase FAH1 {ECO:0000305}; EC=1.14.18.7 {ECO:0000269|PubMed:22635113}; AltName: Full=Fatty acid 2-hydroxylase 1 {ECO:0000303|PubMed:19054355}; Short=AtFAH1 {ECO:0000303|PubMed:19054355};	SubName: Full=Uncharacterized protein {ECO:0000313|EMBL:KNA24384.1};	Sphingolipid fatty acid hydroxylase	GO:0005783,endoplasmic reticulum; GO:0005789,endoplasmic reticulum membrane; GO:0016021,integral component of membrane; GO:0005506,iron ion binding; GO:0016491,oxidoreductase activity; GO:0006633,fatty acid biosynthetic process; GO:0000038,very long-chain fatty acid metabolic process	PF04116.13:Fatty acid hydroxylase superfamily
gene-LOC110739538	22.27	22.35	19.8	4.88	9.74	7.8	389	368	287	54	160	121	-1.43652	0.000186104	0.0162454	down	NW_018743503.1	3238684	3249913	-	LOC110739538	--	K02990 small subunit ribosomal protein S6 | (RefSeq) uncharacterized protein LOC110739538 (A)	ko03010: Ribosome	uncharacterized protein LOC110739538 [Chenopodium quinoa]	--	SubName: Full=Uncharacterized protein {ECO:0000313|EMBL:KNA10190.1};	Mitochondrial ribosomal protein MRP17	GO:0005840,ribosome; GO:0019843,rRNA binding; GO:0003735,structural constituent of ribosome; GO:0006412,translation	PF01250.17:Ribosomal protein S6
gene-LOC110739697	22.44	16.25	33.82	3.87	6.81	9.57	375	256	469	41	107	142	-1.80809	0.000574509	0.035077	down	NW_018743510.1	1937076	1937897	-	LOC110739697	--	--	--	uncharacterized protein LOC110739697 [Chenopodium quinoa]	--	SubName: Full=Uncharacterized protein {ECO:0000313|EMBL:KDP22604.1};	--	GO:0016021,integral component of membrane	PF11820.8:Protein of unknown function (DUF3339)
gene-LOC110739714	36.62	1.88	14.38	23.91	313.19	271.94	1221	59	398	505	9821	8049	3.48759	0.000630302	0.0367777	up	NW_018742244.1	2104133	2105856	-	LOC110739714	--	--	--	proline-rich protein 4-like [Chenopodium quinoa]	RecName: Full=Proline-rich protein 4; Short=AtPRP4; Flags: Precursor;	SubName: Full=Uncharacterized protein {ECO:0000313|EMBL:CCB60649.1};	--	GO:0005618,cell wall; GO:0005576,extracellular region	PF01190.17:Pollen proteins Ole e I like
gene-LOC110739769	0.4	0.13	0.11	0.79	2.82	2.91	17	5	4	21	112	109	3.35663	0.000345026	0.0251205	up	NW_018743510.1	4424021	4429805	+	LOC110739769	--	K05350 beta-glucosidase [EC:3.2.1.21] | (RefSeq) beta-glucosidase 44-like (A)	ko00460: Cyanoamino acid metabolism; ko00500: Starch and sucrose metabolism; ko00940: Phenylpropanoid biosynthesis	beta-glucosidase 13-like [Chenopodium quinoa]	RecName: Full=Beta-glucosidase 11; Short=Os4bglu11; EC=3.2.1.21; Flags: Precursor;	SubName: Full=Uncharacterized protein {ECO:0000313|EMBL:KNA24562.1};	Beta-glucosidase, lactase phlorizinhydrolase, and related proteins	GO:0008422,beta-glucosidase activity; GO:0102483,scopolin beta-glucosidase activity; GO:0005975,carbohydrate metabolic process; GO:1901657,glycosyl compound metabolic process	PF00232.18:Glycosyl hydrolase family 1
gene-LOC110739847	3.12	4.72	7.15	0	0.16	0.17	42	60	80	0	2	2	-5.38788	5.37949e-06	0.00129222	down	NW_018743514.1	348807	389789	-	LOC110739847	--	--	--	--	--	--	--	--	--
gene-LOC110739855	107.63	210.17	365.43	10.74	22.23	37.95	1313	2417	3699	83	255	411	-3.24314	2.77944e-08	1.7935e-05	down	NW_018742244.1	2276702	2278263	+	LOC110739855	--	--	--	gibberellin-regulated protein 1-like [Chenopodium quinoa]	RecName: Full=Gibberellin-regulated protein 1; AltName: Full=GAST1 protein homolog 1; Flags: Precursor;	SubName: Full=Uncharacterized protein {ECO:0000313|EMBL:KNA03885.1};	--	GO:0005618,cell wall; GO:0005576,extracellular region; GO:0009505,plant-type cell wall; GO:0009740,gibberellic acid mediated signaling pathway; GO:0009737,response to abscisic acid; GO:0009741,response to brassinosteroid; GO:0009739,response to gibberellin; GO:0009826,unidimensional cell growth	PF02704.14:Gibberellin regulated protein
gene-LOC110739966	72.15	139.59	79.29	163.77	207.38	241.47	2658	4848	2424	3822	7185	7897	1.18652	6.5675e-05	0.0083194	up	NW_018743518.1	268478	270992	+	LOC110739966	--	K13424 WRKY transcription factor 33 | (RefSeq) WRKY transcription factor WRKY24-like (A)	ko04016: MAPK signaling pathway - plant; ko04626: Plant-pathogen interaction	probable WRKY transcription factor 40 [Chenopodium quinoa]	RecName: Full=Probable WRKY transcription factor 40; AltName: Full=WRKY DNA-binding protein 40;	SubName: Full=Uncharacterized protein {ECO:0000313|EMBL:OWM69570.1};	--	GO:0005634,nucleus; GO:0003700,DNA-binding transcription factor activity; GO:0043565,sequence-specific DNA binding; GO:0044212,transcription regulatory region DNA binding; GO:0042742,defense response to bacterium; GO:0050832,defense response to fungus; GO:0045892,negative regulation of transcription, DNA-templated; GO:0031347,regulation of defense response; GO:0010200,response to chitin; GO:00022…	PF03106.15:WRKY DNA -binding domain
gene-LOC110740113	5.52	17	17.27	40.04	39.32	60.26	146	424	379	671	978	1415	1.90781	0.000118625	0.0120653	up	NW_018743518.1	1809168	1810946	-	LOC110740113	--	--	--	NAC domain-containing protein 35-like [Chenopodium quinoa]	RecName: Full=NAC domain-containing protein 22 {ECO:0000303|PubMed:15029955}; Short=ONAC022 {ECO:0000303|PubMed:15029955};	SubName: Full=Uncharacterized protein {ECO:0000313|EMBL:KNA11568.1};	--	GO:0005634,nucleus; GO:0043565,sequence-specific DNA binding; GO:1901002,positive regulation of response to salt stress; GO:1902584,positive regulation of response to water deprivation; GO:0045893,positive regulation of transcription, DNA-templated; GO:0006351,transcription, DNA-templated	PF02365.15:No apical meristem (NAM) protein
gene-LOC110740145	2.93	7.44	9.19	28.27	19.16	31.31	53	127	138	324	326	503	2.11649	0.000113258	0.0117577	up	NW_018743518.1	997581	999912	-	LOC110740145	--	--	--	CASP-like protein XL3 [Chenopodium quinoa]	RecName: Full=CASP-like protein XL3; AltName: Full=CASP-like protein 2C1; Short=GhCASPL2C1;	RecName: Full=CASP-like protein {ECO:0000256|RuleBase:RU361233};	--	GO:0016021,integral component of membrane; GO:0005886,plasma membrane	PF04535.12:Domain of unknown function (DUF588)
gene-LOC110740228	2.9	8.31	2.24	10.06	18.77	27.82	95	257	61	209	579	810	2.18348	0.000224687	0.0183936	up	NW_018743548.1	171316	172928	-	LOC110740228	--	--	--	zinc finger CCCH domain-containing protein 23-like [Chenopodium quinoa]	RecName: Full=Zinc finger CCCH domain-containing protein 20; Short=AtC3H20;	SubName: Full=Uncharacterized protein {ECO:0000313|EMBL:KNA23069.1};	CCCH-type Zn-finger protein	GO:0005886,plasma membrane; GO:0003677,DNA binding; GO:0003700,DNA-binding transcription factor activity; GO:0046872,metal ion binding; GO:0006355,regulation of transcription, DNA-templated; GO:0006979,response to oxidative stress	PF00642.24:Zinc finger C-x8-C-x5-C-x3-H type (and similar)
gene-LOC110740314	2.09	3.2	2.05	0.76	0.95	1.16	216	312	176	50	93	107	-1.24377	0.000985958	0.0488928	down	NW_018743555.1	2321157	2331673	+	LOC110740314	--	--	--	--	--	--	--	--	--
novel.6909	722.195	629.994	753.004	230.68	307.008	328.352	38867	34919	37468	10025	14849	15472	-1.21187	9.97706e-07	0.000360808	down	NW_018744878.1	2482368	2504159	+	--	--	K07393 glutathionyl-hydroquinone reductase [EC:1.8.5.7] | (RefSeq) uncharacterized protein LOC110775499 (A)	--	uncharacterized protein LOC110793978 [Spinacia oleracea]	RecName: Full=RNA-directed DNA polymerase homolog; EC=2.7.7.48; AltName: Full=Reverse transcriptase homolog;	SubName: Full=Pol-polyprotein {ECO:0000313|EMBL:AAY99339.1};	FOG: Transposon-encoded proteins with TYA, reverse transcriptase, integrase domains in various combinations	GO:0005739,mitochondrion; GO:0003968,RNA-directed 5'-3' RNA polymerase activity; GO:0003964,RNA-directed DNA polymerase activity	PF00078.27:Reverse transcriptase (RNA-dependent DNA polymerase)
novel.5968	0	0	0	1.61866	0.574761	1.29464	0	0	0	162	64	141	9.80247	1.0004e-10	1.27872e-07	up	NW_018744502.1	5739824	5741156	.	--	--	--	--	--	--	--	--	--	--
novel.2966	3.72024	3.55702	3.00669	0.76279	0.153143	0.145256	725	715	542	121	27	25	-2.88717	0.00062454	0.0367018	down	NW_018743204.1	1974962	1998121	-	--	--	--	--	hypothetical protein BVRB_7g165340 [Beta vulgaris subsp. vulgaris]	--	SubName: Full=Uncharacterized protein {ECO:0000313|EMBL:KMT10967.1};	--	GO:0004040,amidase activity	PF03078.15:ATHILA ORF-1 family
novel.7435	0	0	0	0	2.37253	0.97923	0	0	0	0	208	84	9.08265	0.000201637	0.0171908	up	NW_018745065.1	1574093	1575823	+	--	--	--	--	uncharacterized protein At1g04910 [Chenopodium quinoa]	--	SubName: Full=Uncharacterized protein {ECO:0000313|EMBL:KNA20269.1};	--	GO:0016021,integral component of membrane; GO:0016757,transferase activity, transferring glycosyl groups; GO:0006004,fucose metabolic process	PF10250.9:GDP-fucose protein O-fucosyltransferase
novel.1016	0.151818	1.29286	0.664936	1.35391	8.27723	11.9554	12	104	48	86	581	818	3.29064	0.000133645	0.0130896	up	NW_018742441.1	1904026	1904865	.	--	--	--	--	uncharacterized protein LOC110716661 [Chenopodium quinoa]	--	SubName: Full=Photoconvertible water-soluble chlorophyll-binding protein 1 {ECO:0000313|EMBL:BAQ20624.1};	--	--	PF04398.12:Protein of unknown function, DUF538
novel.7223	0.553148	0.584349	1.91447	0	0	0	20	22	65	0	0	0	-7.41683	0.000136428	0.0131942	down	NW_018745003.1	1489205	1489593	.	--	--	--	--	uncharacterized protein LOC110716759 [Chenopodium quinoa]	--	SubName: Full=Uncharacterized protein {ECO:0000313|EMBL:CCA66020.1};	--	GO:0003676,nucleic acid binding	--
novel.998	0.098591	0.1948	0	1.39634	1.06264	1.99989	8	17	0	92	78	143	4.06729	0.000174997	0.0155818	up	NW_018742433.1	1648357	1650716	+	--	--	K17604 zinc finger SWIM domain-containing protein 3 | (RefSeq) protein FAR1-RELATED SEQUENCE 5-like (A)	--	protein FAR1-RELATED SEQUENCE 5-like [Chenopodium quinoa]	RecName: Full=Protein FAR1-RELATED SEQUENCE 5;	SubName: Full=FAR1; Zinc finger, SWIM-type {ECO:0000313|EMBL:ABN05718.1};	--	GO:0005634,nucleus; GO:0008270,zinc ion binding; GO:0006355,regulation of transcription, DNA-templated	PF03101.15:FAR1 DNA-binding domain
novel.4176	0.507288	0.718039	1.46099	0	0	0	25	35	64	0	0	0	-7.5945	2.92346e-05	0.0048104	down	NW_018743783.1	1525527	1526035	.	--	--	--	--	--	--	--	--	--	--
novel.5502	2.08051	3.28307	1.95961	4.73173	5.19811	6.82845	205	333	179	376	459	588	1.29575	0.000173398	0.0155486	up	NW_018744268.1	1529079	1531328	-	--	--	--	--	--	--	--	--	--	--
novel.2881	1.34234	0.513991	2.32244	0	0	0	61	24	97	0	0	0	-8.17014	3.0578e-06	0.000863659	down	NW_018743197.1	76691	77171	.	--	--	--	--	--	--	--	--	--	--
novel.7340	0.2869	1.48099	2.72529	0	0.042281	0.043691	30	160	264	0	4	5	-5.63938	1.98105e-06	0.000609293	down	NW_018745024.1	6264891	6266015	.	--	--	--	--	--	--	--	--	--	--
novel.8015	0.845438	0.679134	1.48109	0	0	0.007553	23	19	36	0	0	1	-5.95147	0.000975499	0.0486404	down	NW_018745403.1	623801	624082	.	--	--	--	--	--	--	--	--	--	--
novel.1301	3.8486	1.3459	0.380208	3.76202	37.4603	25.0213	417	150	39	329	3640	2369	3.53127	3.80973e-05	0.00585862	up	NW_018742556.1	668446	669608	.	--	--	--	--	non-specific lipid-transfer protein 2-like [Chenopodium quinoa]	RecName: Full=Non-specific lipid-transfer protein 2 {ECO:0000303|PubMed:23913675}; AltName: Full=Allergen Api g 6.0101 {ECO:0000303|PubMed:23913675}; AltName: Allergen=Api g 6 {ECO:0000303|PubMed:23913675};	SubName: Full=Uncharacterized protein {ECO:0000313|EMBL:KNA07509.1};	--	GO:0008289,lipid binding; GO:0006869,lipid transport	PF14368.6:Probable lipid transfer
novel.868	0	0	0	1.33467	4.02356	1.70126	0	0	0	96	321	132	10.1679	5.19755e-13	1.00615e-09	up	NW_018742418.1	1593289	1594241	.	--	--	K13484 5-hydroxyisourate hydrolase / 2-oxo-4-hydroxy-4-carboxy-5-ureidoimidazoline decarboxylase [EC:3.5.2.17 4.1.1.97] | (RefSeq) uric acid degradation bifunctional protein TTL (A)	ko00230: Purine metabolism	glutathione S-transferase T2-like [Chenopodium quinoa]	RecName: Full=Glutathione S-transferase T3; Short=AtGSTT3; EC=2.5.1.18; AltName: Full=GST class-theta member 3; AltName: Full=Glutathione S-transferase 10C;	SubName: Full=Uncharacterized protein {ECO:0000313|EnsemblPlants:Bo3g043190.1};	--	GO:0005737,cytoplasm; GO:0005634,nucleus; GO:0004364,glutathione transferase activity; GO:0006749,glutathione metabolic process; GO:0009407,toxin catabolic process	PF04504.14:Protein of unknown function, DUF573
novel.2482	0.890405	0.596987	0.837058	0	0	0	31	21	27	0	0	0	-6.89395	0.000429405	0.0293028	down	NW_018742987.1	1129644	1130010	.	--	--	--	--	--	--	--	--	--	--
novel.3576	0.790044	0.370758	1.4694	14.3136	220.819	138.87	64	31	110	936	16067	9844	7.00676	7.71314e-18	4.23053e-14	up	NW_018743389.1	5355845	5356715	.	--	--	--	--	--	--	--	--	--	--
novel.333	0	0	0	4.3505	0.220856	1.20909	0	0	0	81	5	25	8.29573	8.10105e-05	0.0094204	up	NW_018742238.1	833146	833390	.	--	--	--	--	--	--	--	--	--	--
novel.5760	0.814364	1.29008	1.09517	1.7629	2.62403	3.47339	186	305	234	325	540	696	1.33562	6.59482e-05	0.0083194	up	NW_018744369.1	1075073	1076955	-	--	--	--	--	--	--	--	--	--	--
novel.84	1.14799	2.79274	25.6625	0	0.192851	0.362698	78	196	1610	0	12	22	-5.94968	5.79232e-06	0.00136157	down	NW_018742204.1	11753718	11754447	.	--	--	--	--	--	--	--	--	--	--
novel.1980	2.00898	1.55221	1.95452	0	0.113072	0.225381	118	94	106	0	6	12	-4.08159	2.8059e-05	0.00465336	down	NW_018742815.1	5701056	5701686	.	--	--	--	--	uncharacterized protein LOC110692208 [Chenopodium quinoa]	--	SubName: Full=Uncharacterized protein {ECO:0000313|EMBL:KMS99360.1};	FOG: Reverse transcriptase	GO:0003676,nucleic acid binding; GO:0004523,RNA-DNA hybrid ribonuclease activity	PF13456.6:Reverse transcriptase-like
novel.621	0	0	0	2.72545	0.935889	1.53323	0	0	0	394	151	241	10.9531	4.74255e-14	1.1148e-10	up	NW_018742329.1	7587035	7590691	-	--	--	--	--	--	--	--	--	--	--
novel.3704	0	0.222224	0.120334	0.102111	4.39107	13.6963	0	6	3	2	94	284	5.43265	0.000452461	0.0302643	up	NW_018743503.1	568700	568953	.	--	--	--	--	--	--	--	--	--	--
novel.2384	0.308552	0.754566	7.37995	0	0	0	13	31	269	0	0	0	-9.04884	4.19707e-06	0.00108757	down	NW_018742963.1	2031717	2032140	.	--	--	--	--	--	--	--	--	--	--
novel.8200	6.13906	7.13533	6.36714	0.998822	0.803459	1.59616	704	843	675	93	83	161	-2.43778	2.41637e-10	2.84001e-07	down	NW_018745448.1	9219731	9240541	-	--	--	--	--	uncharacterized protein LOC110725985 [Chenopodium quinoa]	--	--	--	--	--
novel.1197	1.92282	2.18847	2.52931	0	0.282575	0.331219	122	143	148	0	17	19	-3.4847	0.000534792	0.0335868	down	NW_018742484.1	7405380	7406059	.	--	--	--	--	--	--	--	--	--	--
novel.6239	4.26497	5.31248	9.51753	1.42377	0.640955	0.873061	595	763	1225	160	82	107	-2.50673	7.07406e-05	0.00862223	down	NW_018744620.1	1682467	1684051	+	--	--	K06268 serine/threonine-protein phosphatase 2B regulatory subunit | (RefSeq) uncharacterized protein LOC110682689 (A)	--	uncharacterized protein LOC110682689 [Chenopodium quinoa]	RecName: Full=Vacuolar cation/proton exchanger 5; AltName: Full=Ca(2+)/H(+) antiporter CAX5; AltName: Full=Ca(2+)/H(+) exchanger 5; AltName: Full=Protein CATION EXCHANGER 5;	SubName: Full=Uncharacterized protein {ECO:0000313|EMBL:KNA17485.1};	Ca2+/H+ antiporter VCX1 and related proteins	GO:0016021,integral component of membrane; GO:0009705,plant-type vacuole membrane; GO:0015369,calcium:proton antiporter activity	PF00036.32:EF hand
novel.3354	0.08464	0.645255	1.88187	0	0	0	4	28	72	0	0	0	-7.39357	0.000727655	0.0401785	down	NW_018743292.1	12540855	12544764	-	--	--	--	--	--	--	--	--	--	--
novel.7043	0.708337	1.65609	1.80852	3.63388	4.22433	10.8605	88	212	208	365	472	1181	2.15764	0.000117634	0.0120599	up	NW_018744988.1	2022948	2024283	.	--	--	K01265 methionyl aminopeptidase [EC:3.4.11.18] | (RefSeq) methionine aminopeptidase 2B-like (A)	--	hypothetical protein VITISV_010115 [Vitis vinifera]	RecName: Full=Retrovirus-related Pol polyprotein from transposon RE1; AltName: Full=Retro element 1 {ECO:0000303|PubMed:10689195}; Short=AtRE1 {ECO:0000303|PubMed:10689195}; Includes: RecName: Full=Protease RE1; EC=3.4.23.-; Includes: RecName: Full=Reverse transcriptase RE1; EC=2.7.7.49; Includes: RecName: Full=Endonuclease RE1;	SubName: Full=Uncharacterized protein {ECO:0000313|EMBL:CAN61230.1};	FOG: Transposon-encoded proteins with TYA, reverse transcriptase, integrase domains in various combinations	GO:0004190,aspartic-type endopeptidase activity; GO:0004519,endonuclease activity; GO:0046872,metal ion binding; GO:0003676,nucleic acid binding; GO:0003964,RNA-directed DNA polymerase activity; GO:0015074,DNA integration; GO:0006310,DNA recombination	--
novel.2611	1.05362	1.84688	2.32613	0.365311	0.579941	0.518848	198	358	405	56	98	86	-1.78116	0.00031952	0.0239524	down	NW_018743047.1	546606	548893	+	--	--	--	--	uncharacterized protein LOC110726809 [Chenopodium quinoa]	--	--	--	--	--
novel.515	1.0533	0.324834	3.90537	0	0	0	29	9	96	0	0	0	-7.78784	0.000125295	0.0125711	down	NW_018742309.1	4301910	4302195	.	--	--	--	--	--	--	--	--	--	--
novel.2332	4.84709	10.7896	8.64333	2.2519	2.86012	2.50678	666	1526	1098	250	353	302	-1.5657	0.000172684	0.0155269	down	NW_018742951.1	7224002	7225478	.	--	--	--	--	uncharacterized protein LOC110781620 [Spinacia oleracea]	--	SubName: Full=Uncharacterized protein {ECO:0000313|EMBL:KMS95990.1};	--	GO:0016021,integral component of membrane	--
novel.97	0.216869	0.460318	0.468436	5.94678	2.89858	3.55721	64	140	128	1418	769	920	3.65438	1.09337e-09	1.02805e-06	up	NW_018742204.1	13638149	13641323	+	--	--	K13459 disease resistance protein RPS2 | (RefSeq) probable disease resistance protein At4g27220 (A)	ko04626: Plant-pathogen interaction	probable disease resistance protein At4g27220 [Chenopodium quinoa]	RecName: Full=Putative disease resistance protein At1g63350;	SubName: Full=Uncharacterized protein {ECO:0000313|EMBL:ERN01292.1};	Apoptotic ATPase	GO:0005886,plasma membrane; GO:0043531,ADP binding; GO:0005524,ATP binding; GO:0006952,defense response; GO:0007165,signal transduction	--
novel.5879	0.047864	0.037457	0	0.540456	0.186961	0.598988	9	8	0	82	32	98	4.11118	0.000514246	0.0327337	up	NW_018744498.1	579522	581529	.	--	--	K10406 kinesin family member C2/C3 | (RefSeq) kinesin KP1-like isoform X1 (A)	--	uncharacterized protein LOC110699536 [Chenopodium quinoa]	--	SubName: Full=Endonuclease/exonuclease/phosphatase {ECO:0000313|EMBL:OMO74878.1};	--	GO:0004519,endonuclease activity; GO:0004527,exonuclease activity	PF14111.6:Domain of unknown function (DUF4283)
novel.533	0.626235	0.186197	5.34767	0	0	0	23	7	177	0	0	0	-8.45765	4.85426e-05	0.00685617	down	NW_018742309.1	6013678	6014060	.	--	--	--	--	--	--	--	--	--	--
novel.4702	1.85129	1.62467	9.32501	0	0	0	130	117	602	0	0	0	-10.4428	3.95812e-11	5.4274e-08	down	NW_018743946.1	1394544	1409283	-	--	--	K13217 pre-mRNA-processing factor 39 | (RefSeq) uncharacterized protein LOC114183870 isoform X1 (A)	--	Reverse transcriptase, RNA-dependent DNA polymerase [Corchorus capsularis]	RecName: Full=Retrovirus-related Pol polyprotein from transposon TNT 1-94; Includes: RecName: Full=Protease; EC=3.4.23.-; Includes: RecName: Full=Reverse transcriptase; EC=2.7.7.49; Includes: RecName: Full=Endonuclease;	SubName: Full=Putative ovule protein {ECO:0000313|EMBL:JAP37182.1}; Flags: Fragment;	FOG: Transposon-encoded proteins with TYA, reverse transcriptase, integrase domains in various combinations	GO:0004190,aspartic-type endopeptidase activity; GO:0004519,endonuclease activity; GO:0003676,nucleic acid binding; GO:0003964,RNA-directed DNA polymerase activity; GO:0008270,zinc ion binding; GO:0015074,DNA integration	PF07727.14:Reverse transcriptase (RNA-dependent DNA polymerase)
novel.2748	1.24139	3.35688	14.5246	0	0.230215	0.302085	48	134	520	0	9	11	-5.2228	1.8903e-05	0.00341801	down	NW_018743099.1	2334812	2335227	.	--	--	K02961 small subunit ribosomal protein S17 | (RefSeq) uncharacterized LOC103833230 (A)	ko03010: Ribosome	hypothetical protein EUGRSUZ_J02069 [Eucalyptus grandis]	--	SubName: Full=Uncharacterized protein {ECO:0000313|EMBL:KCW52706.1};	--	--	--
novel.1654	0	0	0	0.893725	2.41874	1.41169	0	0	0	86	258	147	10.0033	4.23683e-13	8.71437e-10	up	NW_018742730.1	688285	689557	.	--	--	K13484 5-hydroxyisourate hydrolase / 2-oxo-4-hydroxy-4-carboxy-5-ureidoimidazoline decarboxylase [EC:3.5.2.17 4.1.1.97] | (RefSeq) uric acid degradation bifunctional protein TTL (A)	ko00230: Purine metabolism	glutathione S-transferase T2-like [Chenopodium quinoa]	RecName: Full=Glutathione S-transferase T2; Short=AtGSTT2; EC=2.5.1.18; AltName: Full=GST class-theta member 2; AltName: Full=Glutathione S-transferase 10B;	SubName: Full=Uncharacterized protein {ECO:0000313|EMBL:KYP64358.1};	--	GO:0005737,cytoplasm; GO:0005777,peroxisome; GO:0004364,glutathione transferase activity; GO:0006749,glutathione metabolic process; GO:0009407,toxin catabolic process	--
novel.4299	7.49671	4.32594	7.2309	0.47342	1.84146	2.17486	550	327	490	29	122	140	-2.13301	0.000102083	0.0108152	down	NW_018743850.1	1573813	1574600	.	--	--	--	--	uncharacterized protein LOC110685610 [Chenopodium quinoa]	--	SubName: Full=Uncharacterized protein {ECO:0000313|EMBL:KYP39696.1};	Uncharacterized conserved protein	--	PF09791.9:Oxidoreductase-like protein, N-terminal
novel.4169	1.00121	0.854938	1.99555	0	0.103311	0.079535	87	76	159	0	8	7	-4.40097	1.63368e-05	0.00308981	down	NW_018743783.1	709324	710250	.	--	--	K03952 NADH dehydrogenase (ubiquinone) 1 alpha subcomplex subunit 8 | (RefSeq) NADH dehydrogenase [ubiquinone] 1 alpha subcomplex subunit 8-A-like (A)	ko00190: Oxidative phosphorylation	NADH dehydrogenase [ubiquinone]	RecName: Full=NADH dehydrogenase [ubiquinone] 1 alpha subcomplex subunit 8-A;	SubName: Full=Uncharacterized protein {ECO:0000313|EMBL:KNA18107.1};	NADH:ubiquinone oxidoreductase, NDUFA8/PGIV/19 kDa subunit	GO:0005758,mitochondrial intermembrane space; GO:0005747,mitochondrial respiratory chain complex I; GO:0009536,plastid; GO:0055114,oxidation-reduction process	--
novel.5496	0.578084	0.09064	2.62479	0	0	0	25	4	104	0	0	0	-7.79941	0.000333045	0.0244646	down	NW_018744268.1	513994	515985	+	--	--	--	--	--	--	--	--	--	--
novel.5406	13.3985	13.993	27.1732	4.79857	2.12693	2.91586	1134	1219	2126	328	162	216	-2.27949	0.000221048	0.0182318	down	NW_018744239.1	3531708	3532617	.	--	--	--	--	--	--	--	--	--	--
novel.5689	0	0.118749	0	10.3342	1.13829	0.414858	0	4	0	243	30	11	7.01592	7.03107e-05	0.00862152	up	NW_018744348.1	526599	526910	.	--	--	--	--	--	--	--	--	--	--
novel.2653	0	0	0	1.35018	0.258451	0.271262	0	0	0	92	20	20	8.5267	9.28384e-06	0.00198391	up	NW_018743050.1	2903513	2904418	.	--	--	K03283 heat shock 70kDa protein 1/2/6/8 | (RefSeq) heat shock 70 kDa protein-like (A)	ko03040: Spliceosome; ko04141: Protein processing in endoplasmic reticulum; ko04144: Endocytosis	uncharacterized protein LOC110725423 [Chenopodium quinoa]	RecName: Full=Putative ribonuclease H protein At1g65750; EC=3.1.26.4;	SubName: Full=Uncharacterized protein {ECO:0000313|EMBL:CCA66009.1};	FOG: Reverse transcriptase	GO:0046872,metal ion binding; GO:0003676,nucleic acid binding; GO:0004523,RNA-DNA hybrid ribonuclease activity	PF13456.6:Reverse transcriptase-like
novel.5346	2.41188	0.812119	1.31947	0.207167	0.32373	0.558402	462	160	234	33	56	94	-2.03653	0.000601376	0.0358658	down	NW_018744167.1	2544751	2546808	.	--	--	K05666 ATP-binding cassette, subfamily C (CFTR/MRP), member 2 | (RefSeq) ABC transporter C family member 10-like (A)	ko02010: ABC transporters	PREDICTED: ABC transporter C family member 10-like [Beta vulgaris subsp. vulgaris]	--	SubName: Full=Uncharacterized protein {ECO:0000313|EMBL:KNA04991.1};	--	GO:0016021,integral component of membrane; GO:0005524,ATP binding; GO:0042626,ATPase activity, coupled to transmembrane movement of substances	--
novel.4249	0.912149	0.943238	1.22141	0	0	0	28	30	35	0	0	0	-7.13318	0.000130903	0.0128978	down	NW_018743812.1	795331	795659	.	--	--	--	--	--	--	--	--	--	--
novel.6590	0.187652	0.748653	2.30022	0	0	0	7	25	69	0	0	0	-7.35091	0.000505578	0.0324329	down	NW_018744718.1	3443374	3443717	.	--	--	--	--	--	--	--	--	--	--
novel.1432	0	0.366211	2.7955	0	0	0	0	40	270	0	0	0	-9.03543	0.000421851	0.0291042	down	NW_018742616.1	3316850	3317971	.	--	--	--	--	--	--	--	--	--	--
novel.3692	1.49345	1.83105	4.31761	0.486699	0.284248	0.380803	153	192	407	40	27	34	-2.59747	0.000283291	0.0220398	down	NW_018743476.1	1701682	1702776	.	--	--	--	--	--	--	--	--	--	--
novel.8258	0.880145	0.757854	0.981662	0	0.047038	0.048284	84	74	86	0	4	4	-4.81021	6.50676e-07	0.000267664	down	NW_018745461.1	875787	876804	.	--	--	--	--	--	--	--	--	--	--
novel.8445	0.043164	0.187937	0.186742	0.761719	0.742607	1.06966	9	36	33	115	124	174	2.67361	0.000157543	0.0144856	up	NW_018745542.1	986733	988862	-	--	--	--	--	zinc finger MYM-type protein 1-like [Chenopodium quinoa]	--	SubName: Full=Uncharacterized protein {ECO:0000313|EMBL:PIN11338.1};	--	--	PF14291.6:Domain of unknown function (DUF4371)
novel.1255	0	0.041935	0	0.889456	1.92236	1.37764	0	6	0	100	239	167	6.72221	1.05369e-09	1.02805e-06	up	NW_018742536.1	7647	9134	.	--	--	K13484 5-hydroxyisourate hydrolase / 2-oxo-4-hydroxy-4-carboxy-5-ureidoimidazoline decarboxylase [EC:3.5.2.17 4.1.1.97] | (RefSeq) uric acid degradation bifunctional protein TTL (A)	ko00230: Purine metabolism	glutathione S-transferase T2-like [Chenopodium quinoa]	RecName: Full=Glutathione S-transferase T3; Short=AtGSTT3; EC=2.5.1.18; AltName: Full=GST class-theta member 3; AltName: Full=Glutathione S-transferase 10C;	SubName: Full=Uncharacterized protein {ECO:0000313|EMBL:KYP64358.1};	--	GO:0005737,cytoplasm; GO:0005634,nucleus; GO:0004364,glutathione transferase activity; GO:0006749,glutathione metabolic process; GO:0009407,toxin catabolic process	--
novel.5794	1.14691	0.746781	0.954952	0.271455	0.165044	0.164158	333	223	256	64	43	42	-2.04911	0.000538789	0.0337092	down	NW_018744452.1	191025	194141	.	--	--	--	--	hypothetical protein GLYMA_13G016400 [Glycine max]	--	SubName: Full=Uncharacterized protein {ECO:0000313|EMBL:KRH17792.1};	--	--	--
novel.8518	0	0	0	0	1.69049	2.46303	0	0	0	0	82	116	8.49953	0.000815134	0.0434065	up	NW_018745617.1	2007813	2012035	+	--	--	K03860 phosphatidylinositol glycan, class Q | (RefSeq) N-acetylglucosaminyl-phosphatidylinositol biosynthetic protein gpi1-like (A)	ko00563: Glycosylphosphatidylinositol (GPI)-anchor biosynthesis	peamaclein-like [Chenopodium quinoa]	RecName: Full=Snakin-1; Flags: Precursor;	SubName: Full=Gibberellin-regulated protein {ECO:0000313|EMBL:AFT92001.1};	--	GO:0005618,cell wall; GO:0005576,extracellular region; GO:0006952,defense response	PF02704.14:Gibberellin regulated protein
novel.5177	16.9528	10.0423	22.9633	2.13038	7.50772	5.00788	1439	878	1802	146	573	373	-1.80708	0.000489626	0.0319704	down	NW_018744111.1	116424	117336	.	--	--	--	--	--	--	--	--	--	--
novel.108	1.10244	1.04765	1.15671	1.75025	2.90209	4.38154	192	188	186	246	454	668	1.4627	2.64482e-05	0.00453324	up	NW_018742204.1	14531579	14533449	.	--	--	K10406 kinesin family member C2/C3 | (RefSeq) kinesin KP1-like (A)	--	uncharacterized protein LOC110699536 [Chenopodium quinoa]	--	SubName: Full=Uncharacterized protein {ECO:0000313|EMBL:OMP08983.1};	FOG: Reverse transcriptase	GO:0003676,nucleic acid binding; GO:0008270,zinc ion binding	PF14392.6:Zinc knuckle
novel.4282	14.6122	10.0362	17.7883	4.90681	4.87274	4.70106	1188	840	1337	322	356	335	-1.44489	0.000807982	0.0431654	down	NW_018743828.1	485727	486600	.	--	--	--	--	uncharacterized protein LOC110795405 isoform X1 [Spinacia oleracea]	--	--	--	--	--
novel.7117	283.973	326.554	449.661	78.9418	193.355	161.69	26474	31354	38759	5943	16201	13198	-1.28981	0.000329471	0.0243238	down	NW_018744996.1	854198	855778	-	--	--	--	--	--	--	--	--	--	--
novel.6264	0.33571	0.699134	4.77081	0	0.0621881	0.0640475	25	52	316	0	5	5	-5.38446	6.73433e-05	0.00845879	down	NW_018744626.1	1994036	1994805	-	--	--	K05391 cyclic nucleotide gated channel, plant | (RefSeq) cyclic nucleotide-gated ion channel 18 (A)	ko04626: Plant-pathogen interaction	PREDICTED: cyclic nucleotide-gated ion channel 18 [Beta vulgaris subsp. vulgaris]	RecName: Full=Putative cyclic nucleotide-gated ion channel 15; AltName: Full=Cyclic nucleotide- and calmodulin-regulated ion channel 15;	SubName: Full=Uncharacterized protein {ECO:0000313|EMBL:KOM38244.1};	K+-channel ERG and related proteins, contain PAS/PAC sensor domain	GO:0005887,integral component of plasma membrane; GO:0005516,calmodulin binding; GO:0030552,cAMP binding; GO:0030553,cGMP binding; GO:0005249,voltage-gated potassium channel activity; GO:0042391,regulation of membrane potential	PF00027.29:Cyclic nucleotide-binding domain
novel.2696	3.24759	3.44441	2.82408	1.15554	0.787282	0.979219	349	381	280	100	76	92	-1.53781	0.00100346	0.0491413	down	NW_018743066.1	2177554	2179223	-	--	--	--	--	uncharacterized protein LOC110687342 [Chenopodium quinoa]	--	SubName: Full=uncharacterized protein LOC107813177 {ECO:0000313|RefSeq:XP_016493891.1};	--	--	--
novel.7834	2.62303	2.64372	4.75148	0.704528	0.209988	0.512154	286	296	478	62	21	49	-2.62106	0.000231017	0.0187273	down	NW_018745286.1	4792236	4793484	-	--	--	--	--	--	--	--	--	--	--
novel.122	0.584063	1.57743	2.42202	0.221539	0.233979	0.222523	131	364	501	40	47	44	-2.67267	6.8818e-05	0.00853408	down	NW_018742204.1	16071402	16073805	+	--	--	--	--	--	--	--	--	--	--
novel.3311	1.5891	1.01798	0.913346	8.44465	3.04427	4.74785	196	130	105	840	338	513	2.45922	9.81888e-05	0.0105598	up	NW_018743292.1	7978437	7979761	+	--	--	K02988 small subunit ribosomal protein S5 | (RefSeq) 30S ribosomal protein S5-like (A)	ko03010: Ribosome	ataxia telangiectasia mutated family protein [Dendrobium catenatum]	--	SubName: Full=Ataxia telangiectasia mutated family protein {ECO:0000313|EMBL:PKU69530.1};	--	--	--
novel.3763	0.690167	1.27023	1.83067	0.231577	0.232737	0.425474	118	224	290	32	36	64	-2.0531	0.000789953	0.042478	down	NW_018743510.1	4514979	4516816	+	--	--	--	--	--	--	--	--	--	--
novel.1620	0.682356	0.305295	7.16759	0	0	0	24	12	229	0	0	0	-8.81545	1.10069e-05	0.00224984	down	NW_018742720.1	1601169	1608542	+	--	--	K13217 pre-mRNA-processing factor 39 | (RefSeq) uncharacterized protein LOC114183870 isoform X1 (A)	--	Cysteine-rich RLK (receptor-like protein kinase) 8 [Dorcoceras hygrometricum]	RecName: Full=Retrovirus-related Pol polyprotein from transposon TNT 1-94; Includes: RecName: Full=Protease; EC=3.4.23.-; Includes: RecName: Full=Reverse transcriptase; EC=2.7.7.49; Includes: RecName: Full=Endonuclease;	SubName: Full=Uncharacterized protein {ECO:0000313|EMBL:CAN62906.1};	FOG: Transposon-encoded proteins with TYA, reverse transcriptase, integrase domains in various combinations	GO:0004190,aspartic-type endopeptidase activity; GO:0004519,endonuclease activity; GO:0003676,nucleic acid binding; GO:0003964,RNA-directed DNA polymerase activity; GO:0008270,zinc ion binding; GO:0015074,DNA integration	PF07727.14:Reverse transcriptase (RNA-dependent DNA polymerase)
novel.6018	0	0	0	3.94381	2.31116	0.997984	0	0	0	130	85	36	9.32663	1.48171e-08	1.03957e-05	up	NW_018744537.1	2125662	2126182	-	--	--	K10268 F-box and leucine-rich repeat protein 2/20 | (RefSeq) F-box/LRR-repeat protein 20-like (A)	--	F-box/LRR-repeat protein 20-like [Chenopodium quinoa]	--	SubName: Full=Uncharacterized protein {ECO:0000313|EMBL:KNA05739.1};	Leucine rich repeat proteins, some proteins contain F-box	--	PF13516.6:Leucine Rich repeat
novel.8013	8.07681	61.933	50.8326	4.88413	2.83806	10.451	479	3783	2788	234	152	543	-2.67452	0.000415754	0.0288651	down	NW_018745403.1	429813	430450	.	--	--	--	--	--	--	--	--	--	--
novel.8025	1.0951	1.10449	1.28743	0	0.042451	0.088893	48	50	53	0	2	4	-4.53815	6.02899e-05	0.00787333	down	NW_018745403.1	1365506	1365975	.	--	--	--	--	--	--	--	--	--	--
novel.4445	0.887968	0.369448	1.50328	0	0.023705	0.145512	84	36	131	0	3	12	-4.1006	0.000917821	0.046612	down	NW_018743880.1	2090972	2091981	.	--	--	--	--	--	--	--	--	--	--
novel.5423	1.94136	2.79847	1.86174	0.669784	0.979265	0.963561	425	630	376	118	193	185	-1.2495	5.68806e-05	0.00757258	down	NW_018744239.1	5388599	5392095	-	--	--	K04368 mitogen-activated protein kinase kinase 1 [EC:2.7.12.2] | (RefSeq) mitogen-activated protein kinase kinase 6 isoform X1 (A)	ko04626: Plant-pathogen interaction	uncharacterized protein LOC110798022 [Spinacia oleracea]	--	SubName: Full=uncharacterized protein LOC104218728 {ECO:0000313|RefSeq:XP_009767593.1};	FOG: Reverse transcriptase	--	PF14111.6:Domain of unknown function (DUF4283)
novel.1763	1.42624	0.469369	0.828893	3.47552	3.56067	4.09861	146	50	79	286	326	366	2.12066	0.000112926	0.0117577	up	NW_018742738.1	9061104	9062198	-	--	--	K10880 DNA-repair protein XRCC3 | (RefSeq) DNA repair protein XRCC3 homolog (A)	ko03440: Homologous recombination	DNA repair protein XRCC3 homolog [Chenopodium quinoa]	RecName: Full=DNA repair protein XRCC3 homolog; AltName: Full=X-ray repair cross-complementing protein 3 homolog; Short=AtXRCC3;	SubName: Full=Uncharacterized protein {ECO:0000313|EMBL:KDP36401.1};	DNA repair protein RHP57	GO:0033063,Rad51B-Rad51C-Rad51D-XRCC2 complex; GO:0005657,replication fork; GO:0005524,ATP binding; GO:0008094,DNA-dependent ATPase activity; GO:0003690,double-stranded DNA binding; GO:0000400,four-way junction DNA binding; GO:0000150,recombinase activity; GO:0003697,single-stranded DNA binding; GO:0006302,double-strand break repair; GO:0045003,double-strand break repair via synthesis-dependent s…	--
novel.6902	1.18842	0.400104	1.01677	0	0	0	92	32	72	0	0	0	-8.22463	7.47013e-07	0.000291122	down	NW_018744878.1	1981416	1985471	+	--	--	--	--	HEAT repeat-containing protein 6-like isoform X1 [Chenopodium quinoa]	--	SubName: Full=Uncharacterized protein {ECO:0000313|EMBL:KMS95504.1};	HEAT and armadillo repeat-containing protein	--	--
novel.2954	0	0.035237	0	3.43165	0.535609	0.894291	0	2	0	108	19	31	7.00366	4.52159e-05	0.00658412	up	NW_018743204.1	1148955	1149373	.	--	--	--	--	--	--	--	--	--	--
novel.359	0.235937	0.623877	0	5.7984	2.56873	4.94977	21	55	0	397	196	368	4.20553	0.000271101	0.0213437	up	NW_018742241.1	357512	358423	.	--	--	--	--	--	--	--	--	--	--
novel.354	0	0	0	5.79785	4.22211	4.85017	0	0	0	730	592	663	12.1827	6.89843e-21	7.56735e-17	up	NW_018742241.1	264531	266440	-	--	--	--	--	--	--	--	--	--	--
novel.355	0.114455	0.079379	0	2.66171	2.13207	2.82635	28	21	0	526	469	606	5.46313	7.95417e-09	6.08753e-06	up	NW_018742241.1	267557	271241	-	--	--	--	--	--	--	--	--	--	--
novel.103	1.74172	8.1776	18.2451	0.898711	1.08945	1.28159	193	929	1860	81	108	124	-3.07941	8.28867e-05	0.00955383	down	NW_018742204.1	14263587	14264772	.	--	--	--	--	hypothetical protein BVRB_6g141760 [Beta vulgaris subsp. vulgaris]	--	SubName: Full=Uncharacterized protein {ECO:0000313|EMBL:KMT08309.1};	--	--	--
novel.8446	0	0	0	4.36336	0.30968	0.912358	0	0	0	208	17	48	9.61991	2.41253e-07	0.00011342	up	NW_018745542.1	1009298	1009932	.	--	--	--	--	--	--	--	--	--	--
novel.8448	0	0	0	2.36822	1.84115	2.93813	0	0	0	222	192	299	10.6524	1.26248e-15	4.15469e-12	up	NW_018745542.1	1012889	1026215	-	--	--	--	--	--	--	--	--	--	--
novel.541	0.346203	0.0791366	0.301964	0	0	0	48	12	39	0	0	0	-7.25192	0.00023104	0.0187273	down	NW_018742316.1	4416	23455	+	--	--	--	--	hypothetical protein GLYMA_13G021700, partial [Glycine max]	--	SubName: Full=Uncharacterized protein {ECO:0000313|EMBL:KRH17852.1}; Flags: Fragment;	--	--	--
novel.8394	8.05272	9.729	13.5403	3.17937	3.64778	2.10619	671	836	1044	214	274	155	-1.67838	0.000611107	0.0361707	down	NW_018745533.1	2295056	2299763	+	--	--	--	--	uncharacterized protein LOC110721828 [Chenopodium quinoa]	--	SubName: Full=uncharacterized protein LOC104245294 {ECO:0000313|RefSeq:XP_009799190.1};	--	GO:0016021,integral component of membrane	--
novel.3987	3.27473	2.83348	3.15767	61.7682	873.504	657.491	238	212	212	3621	56988	41789	7.32633	1.81697e-26	2.98974e-22	up	NW_018743616.1	3740196	3740976	.	--	--	--	--	--	--	--	--	--	--
novel.3931	0.0344	0.160996	0.052301	0.187593	1.98578	0.913211	9	40	12	36	423	190	3.57052	7.72163e-05	0.00908843	up	NW_018743593.1	767890	770439	-	--	--	--	--	--	--	--	--	--	--
novel.4344	1.64394	1.2579	6.17885	0	0	0.219414	157	124	545	0	0	19	-5.55595	0.000182592	0.0161097	down	NW_018743850.1	5590646	5592484	+	--	--	--	--	--	--	--	--	--	--
novel.3768	582.532	628.147	654.453	221.876	264.601	344.124	68061	75585	70697	20933	27784	35202	-1.09609	4.83802e-06	0.00120617	down	NW_018743510.1	5338610	5339866	-	--	--	--	--	--	--	--	--	--	--
novel.3168	0.345114	1.70788	2.54789	0	0.07333	0.112908	42	214	286	0	8	12	-4.76262	2.77336e-05	0.00465336	down	NW_018743252.1	10769074	10770379	.	--	--	--	--	uncharacterized protein LOC110713414 [Chenopodium quinoa]	--	SubName: Full=Uncharacterized protein {ECO:0000313|EMBL:CCA66020.1};	--	GO:0003676,nucleic acid binding	--
novel.3540	0	0	0	0.125102	0.832738	1.49247	0	0	0	12	89	156	8.92417	1.87617e-07	9.07984e-05	up	NW_018743380.1	16609	17886	.	--	--	K20855 beta-1,3-galactosyltransferase 1/2/3/4/5/7/8 [EC:2.4.1.-] | (RefSeq) probable beta-1,3-galactosyltransferase 2 (A)	--	uncharacterized protein LOC110687365 [Chenopodium quinoa]	--	SubName: Full=Uncharacterized protein {ECO:0000313|EMBL:KNA24128.1};	--	--	PF04520.13:Senescence regulator
novel.4288	19.809	12.6629	25.4669	3.78971	1.32008	1.29777	2085	1373	2479	323	126	120	-2.90223	3.0083e-05	0.004901	down	NW_018743828.1	798067	815898	-	--	--	--	--	probable membrane-associated kinase regulator 5 [Chenopodium quinoa]	--	--	--	--	--
novel.629	0.410391	0.331052	0.802966	0	0	0	27	22	48	0	0	0	-7.24008	0.000144197	0.0137096	down	NW_018742345.1	781655	782344	.	--	--	K00799 glutathione S-transferase [EC:2.5.1.18] | (RefSeq) uncharacterized protein LOC110786294 (A)	ko00480: Glutathione metabolism	uncharacterized protein LOC110715453 [Chenopodium quinoa]	--	SubName: Full=Uncharacterized protein {ECO:0000313|EMBL:CCA66050.1};	FOG: Reverse transcriptase	GO:0003676,nucleic acid binding	PF13456.6:Reverse transcriptase-like
novel.2968	0	0.120628	0	0.71035	2.1599	2.97431	0	18	0	83	278	373	5.64319	5.26212e-05	0.00718553	up	NW_018743204.1	2026962	2028499	.	--	--	--	--	LIM and calponin homology domains-containing protein 1-like [Chenopodium quinoa]	--	--	--	--	--
novel.949	0.929484	0.789196	0.770754	0	0.041748	0.165985	100	87	76	0	5	16	-3.59264	0.000993931	0.0488928	down	NW_018742418.1	6943274	6944420	.	--	--	--	--	uncharacterized protein LOC110717342 [Chenopodium quinoa]	--	SubName: Full=Uncharacterized protein {ECO:0000313|EMBL:CCA66020.1};	--	GO:0003676,nucleic acid binding	--
novel.6019	0	0	0	4.00572	2.77001	1.51676	0	0	0	132	102	55	9.48059	1.07785e-09	1.02805e-06	up	NW_018744537.1	2173004	2173524	+	--	--	K10268 F-box and leucine-rich repeat protein 2/20 | (RefSeq) F-box/LRR-repeat protein 20-like (A)	--	F-box/LRR-repeat protein 20-like [Chenopodium quinoa]	--	SubName: Full=Uncharacterized protein {ECO:0000313|EMBL:KNA05739.1};	Leucine rich repeat proteins, some proteins contain F-box	--	PF13516.6:Leucine Rich repeat
novel.8623	3.19879	4.66134	4.77752	1.09713	1.48861	1.33324	208	312	287	58	87	76	-1.60336	0.000157238	0.0144856	down	NW_018745675.1	2050465	2051163	-	--	--	--	--	--	--	--	--	--	--
novel.3776	0.675916	0.460739	3.94454	0	0	0	23	16	121	0	0	0	-8.05139	4.18973e-05	0.00626727	down	NW_018743516.1	378245	378598	.	--	--	--	--	--	--	--	--	--	--
novel.5557	0	0	0	1.12359	0.273559	0.909802	0	0	0	57	16	50	8.24011	5.90936e-06	0.00137923	up	NW_018744290.1	2115896	2117623	+	--	--	K03437 RNA methyltransferase, TrmH family | (RefSeq) uncharacterized protein LOC110695273 (A)	--	uncharacterized protein LOC110706115 [Chenopodium quinoa]	--	SubName: Full=Uncharacterized protein {ECO:0000313|EMBL:KNA13356.1};	SpoU rRNA Methylase family protein	GO:0003723,RNA binding; GO:0008173,RNA methyltransferase activity; GO:0006396,RNA processing	PF00588.19:SpoU rRNA Methylase family
novel.5029	7.48489	7.4291	10.1279	1.1684	2.24128	0.902633	316	323	396	40	85	34	-2.45454	5.09407e-06	0.00124178	down	NW_018744080.1	968465	969741	-	--	--	--	--	--	--	--	--	--	--
novel.4630	4.75404	6.44785	3.53122	37.8023	23.4534	26.8616	396	553	272	2540	1754	1957	2.79712	1.85113e-09	1.64646e-06	up	NW_018743920.1	8908668	8909562	.	--	--	--	--	--	--	--	--	--	--
novel.1578	0.644941	0.692741	0.754473	0	0.048663	0.049952	59	66	64	0	4	4	-4.44008	1.35507e-05	0.0026387	down	NW_018742684.1	161753	162736	.	--	--	--	--	--	--	--	--	--	--
novel.1841	0.497302	0.604416	0.672823	0	0.046176	0.047241	48	61	60	0	4	4	-4.28775	5.23131e-05	0.00717321	down	NW_018742770.1	481803	482839	.	--	--	--	--	--	--	--	--	--	--
novel.5015	0.033972	0.070923	0.701532	5.91974	5.17723	3.16593	3	6	46	336	327	195	4.18811	7.40058e-05	0.00885621	up	NW_018744072.1	2287175	2287929	-	--	--	K13484 5-hydroxyisourate hydrolase / 2-oxo-4-hydroxy-4-carboxy-5-ureidoimidazoline decarboxylase [EC:3.5.2.17 4.1.1.97] | (RefSeq) uric acid degradation bifunctional protein TTL (A)	ko00230: Purine metabolism	glutathione S-transferase T2-like [Chenopodium quinoa]	RecName: Full=Glutathione S-transferase T2; Short=AtGSTT2; EC=2.5.1.18; AltName: Full=GST class-theta member 2; AltName: Full=Glutathione S-transferase 10B;	SubName: Full=Uncharacterized protein {ECO:0000313|EMBL:KYP64358.1};	--	GO:0005737,cytoplasm; GO:0005777,peroxisome; GO:0004364,glutathione transferase activity; GO:0006749,glutathione metabolic process; GO:0009407,toxin catabolic process	PF14303.6:No apical meristem-associated C-terminal domain
novel.4108	7.57748	12.5585	9.12245	52.8443	54.1137	73.6845	698	1191	777	3927	4476	5937	2.72904	2.17273e-18	1.43005e-14	up	NW_018743697.1	1647646	1648635	.	--	--	--	--	--	--	--	--	--	--
novel.4527	0.310721	1.0293	2.74269	0	0.112749	0.078865	25	82	196	0	8	6	-4.46852	0.000355094	0.0256267	down	NW_018743919.1	1556487	1557317	.	--	--	--	--	--	--	--	--	--	--
novel.7144	17.3779	1.29075	15.832	24.7446	286.277	213.314	1210	93	1020	1392	17912	13003	3.7906	4.61196e-05	0.00663927	up	NW_018744996.1	3420617	3423328	+	--	--	--	--	--	--	--	--	--	--
novel.5807	2.35636	3.51535	5.61226	0.446158	0.600259	0.468889	314	483	692	48	72	55	-2.85244	6.65304e-08	3.71093e-05	down	NW_018744460.1	2095522	2096954	-	--	--	--	--	--	--	--	--	--	--
novel.1202	8.20956	21.8361	23.8954	3.32349	2.71089	4.58463	802	2195	2157	262	238	392	-2.25621	1.7432e-05	0.00320486	down	NW_018742484.1	7809901	7810950	.	--	--	--	--	hypothetical protein SOVF_118660 [Spinacia oleracea]	--	SubName: Full=Uncharacterized protein {ECO:0000313|EMBL:KNA13221.1};	--	--	--
novel.86	0.122416	0.112847	0.192585	0.410601	1.71437	2.70643	45	42	64	120	554	852	3.39117	7.49496e-08	4.04347e-05	up	NW_018742204.1	11816639	11820505	.	--	--	K13428 LRR receptor-like serine/threonine-protein kinase EFR [EC:2.7.11.1] | (RefSeq) EFR; EF-TU receptor (A)	ko04626: Plant-pathogen interaction	LRR receptor-like serine/threonine-protein kinase EFR [Chenopodium quinoa]	RecName: Full=LRR receptor-like serine/threonine-protein kinase EFR; EC=2.7.11.1; AltName: Full=Elongation factor Tu receptor; Short=EF-Tu receptor; Flags: Precursor;	SubName: Full=Uncharacterized protein {ECO:0000313|EMBL:KNA13589.1};	--	GO:0012505,endomembrane system; GO:0016021,integral component of membrane; GO:0005886,plasma membrane; GO:0005524,ATP binding; GO:0004674,protein serine/threonine kinase activity; GO:0019199,transmembrane receptor protein kinase activity; GO:0010204,defense response signaling pathway, resistance gene-independent; GO:0016045,detection of bacterium; GO:0002764,immune response-regulating signaling p…	PF13855.6:Leucine rich repeat
novel.8385	2.95334	1.51618	5.05653	0	0.469257	0.252248	192	102	304	0	28	15	-3.82571	0.000576789	0.0350861	down	NW_018745533.1	911055	914127	+	--	--	K19984 exocyst complex component 5 | (RefSeq) uncharacterized protein LOC113272286 (A)	--	uncharacterized protein LOC110710692 [Chenopodium quinoa]	RecName: Full=Putative AC transposase; AltName: Full=ORFA;	SubName: Full=zinc finger BED domain-containing protein RICESLEEPER 2-like {ECO:0000313|RefSeq:XP_016740977.1, ECO:0000313|RefSeq:XP_016742294.1};	Tam3-transposase (Ac family)	GO:0003677,DNA binding; GO:0046983,protein dimerization activity; GO:0006310,DNA recombination; GO:0032196,transposition	PF14372.6:Domain of unknown function (DUF4413)
novel.5	0.950543	0.184685	1.86579	0	0.083617	0.036812	76	16	138	0	7	3	-4.54726	0.000672017	0.0381407	down	NW_018742204.1	616471	617329	.	--	--	--	--	--	--	--	--	--	--
novel.4353	5.99963	4.37796	5.47149	1.38388	2.41985	1.97876	463	348	390	87	168	134	-1.39334	0.000136717	0.0131942	down	NW_018743850.1	6077874	6078702	.	--	--	--	--	--	--	--	--	--	--
novel.2352	10.9726	8.6083	11.3698	3.70421	4.51716	4.43054	1108	895	1062	302	410	392	-1.20493	0.00025766	0.020383	down	NW_018742959.1	1265158	1266243	.	--	--	--	--	hypothetical protein BVRB_008000 [Beta vulgaris subsp. vulgaris]	RecName: Full=Rapid alkalinization factor; Short=NtRALF; Flags: Precursor;	SubName: Full=Uncharacterized protein {ECO:0000313|EMBL:KMS95461.1};	--	GO:0005576,extracellular region; GO:0005622,intracellular; GO:0005179,hormone activity; GO:0004871,NA; GO:0019722,calcium-mediated signaling	PF05498.11:Rapid ALkalinization Factor (RALF)
novel.1280	0.656132	0.379429	0.294278	1.13008	1.64948	2.55561	308	184	128	428	696	1050	2.04681	9.4343e-07	0.00034497	up	NW_018742552.1	460899	465942	+	--	--	K14175 (3S,6E)-nerolidol synthase [EC:4.2.3.48] | (RefSeq) (3S,6E)-nerolidol synthase 1-like (A)	ko00909: Sesquiterpenoid and triterpenoid biosynthesis	uncharacterized protein LOC110804849 [Spinacia oleracea]	RecName: Full=RNA-directed DNA polymerase homolog; EC=2.7.7.48; AltName: Full=Reverse transcriptase homolog;	SubName: Full=Putative reverse transcriptase domain, Ribonuclease H-like domain protein {ECO:0000313|EMBL:OTG25010.1};	FOG: Transposon-encoded proteins with TYA, reverse transcriptase, integrase domains in various combinations	GO:0005739,mitochondrion; GO:0003968,RNA-directed 5'-3' RNA polymerase activity; GO:0003964,RNA-directed DNA polymerase activity	PF17919.1:RNase H-like domain found in reverse transcriptase
novel.7492	0	0	0	2.54831	0.781818	0.769165	0	0	0	68	24	23	8.24998	9.79262e-06	0.00207724	up	NW_018745080.1	1549534	1549887	.	--	--	--	--	ankyrin repeat-containing protein BDA1-like [Chenopodium quinoa]	--	--	--	--	--
novel.620	0	0	0	0.95748	1.42707	1.62281	0	0	0	92	153	170	9.79489	3.56324e-13	7.81752e-10	up	NW_018742329.1	7584606	7585885	-	--	--	--	--	uncharacterized protein LOC110689488 [Chenopodium quinoa]	--	--	--	--	PF13456.6:Reverse transcriptase-like
novel.4382	0.86903	0	6.68132	0	0	0	32	0	228	0	0	0	-8.79665	0.000761854	0.0413727	down	NW_018743858.1	635656	636051	.	--	--	--	--	--	--	--	--	--	--
novel.3828	9.77059	3.8071	11.5541	1.11633	0.763149	0.388473	314	126	343	29	22	11	-3.28381	3.22061e-05	0.00517011	down	NW_018743555.1	2977728	2978072	+	--	--	K02112 F-type H+/Na+-transporting ATPase subunit beta [EC:7.1.2.2 7.2.2.1] | (RefSeq) atpB, CDC77_pgp057; AtpB (A)	ko00190: Oxidative phosphorylation; ko00195: Photosynthesis	ATP synthase CF1 beta subunit (chloroplast) [Castanopsis concinna]	RecName: Full=ATP synthase subunit beta, chloroplastic {ECO:0000255|HAMAP-Rule:MF_01347}; EC=3.6.3.14 {ECO:0000255|HAMAP-Rule:MF_01347}; AltName: Full=ATP synthase F1 sector subunit beta {ECO:0000255|HAMAP-Rule:MF_01347}; AltName: Full=F-ATPase subunit beta {ECO:0000255|HAMAP-Rule:MF_01347};	RecName: Full=ATP synthase subunit beta, chloroplastic {ECO:0000256|HAMAP-Rule:MF_01347}; AltName: Full=ATP synthase F1 sector subunit beta {ECO:0000256|HAMAP-Rule:MF_01347}; AltName: Full=F-ATPase subunit beta {ECO:0000256|HAMAP-Rule:MF_01347};	F0F1-type ATP synthase, beta subunit	GO:0009535,chloroplast thylakoid membrane; GO:0045261,proton-transporting ATP synthase complex, catalytic core F(1); GO:0005524,ATP binding; GO:0046933,proton-transporting ATP synthase activity, rotational mechanism; GO:0015986,ATP synthesis coupled proton transport	PF02874.23:ATP synthase alpha/beta family, beta-barrel domain
novel.7010	21.7793	11.7798	6.53887	1.42388	3.11045	5.11346	4525	2521	1256	239	581	931	-2.04878	7.64051e-05	0.00904466	down	NW_018744949.1	1237473	1239707	+	--	--	K02703 photosystem II P680 reaction center D1 protein [EC:1.10.3.9] | (RefSeq) psbA, CDC77_pgp084; PsbA (A)	ko00195: Photosynthesis	photosystem II protein D (chloroplast) [Ficus racemosa]	RecName: Full=Photosystem II protein D1 {ECO:0000255|HAMAP-Rule:MF_01379}; Short=PSII D1 protein {ECO:0000255|HAMAP-Rule:MF_01379}; EC=1.10.3.9 {ECO:0000255|HAMAP-Rule:MF_01379}; AltName: Full=32 kDa thylakoid membrane protein {ECO:0000303|Ref.1}; AltName: Full=Photosystem II Q(B) protein {ECO:0000255|HAMAP-Rule:MF_01379}; Flags: Precursor;	RecName: Full=Photosystem II {ECO:0000256|HAMAP-Rule:MF_01379}; Short=PSII D1 protein {ECO:0000256|HAMAP-Rule:MF_01379}; EC=1.10.3.9 {ECO:0000256|HAMAP-Rule:MF_01379}; AltName: Full=Photosystem II Q(B) protein {ECO:0000256|HAMAP-Rule:MF_01379};	--	GO:0009535,chloroplast thylakoid membrane; GO:0016021,integral component of membrane; GO:0009523,photosystem II; GO:0016168,chlorophyll binding; GO:0045156,electron transporter, transferring electrons within the cyclic electron transport pathway of photosynthesis activity; GO:0046872,metal ion binding; GO:0009772,photosynthetic electron transport in photosystem II; GO:0018298,protein-chromophore …	PF00124.19:Photosynthetic reaction centre protein
novel.4910	0.383	0.344979	0.26797	0.469527	1.03374	1.21916	103	95	67	102	248	285	1.46177	0.000317704	0.0239249	up	NW_018744041.1	255252	258117	-	--	--	--	--	--	--	--	--	--	--
novel.4786	0.71046	0.972697	1.91545	0	0	0	33	46	80	0	0	0	-7.94865	3.6668e-06	0.000981674	down	NW_018743975.1	217869	218354	.	--	--	--	--	--	--	--	--	--	--
novel.6506	0	0	0	0	1.80653	0.931116	0	0	0	0	204	103	9.15123	0.000155685	0.0144856	up	NW_018744702.1	1184657	1186109	-	--	--	--	--	PREDICTED: zinc finger BED domain-containing protein RICESLEEPER 2-like [Beta vulgaris subsp. vulgaris]	--	SubName: Full=Uncharacterized protein {ECO:0000313|EMBL:KNA13392.1};	--	GO:0003677,DNA binding; GO:0046983,protein dimerization activity	--
novel.5352	0.450263	1.5012	3.80665	0	0.071363	0.073253	29	97	220	0	5	5	-5.12492	2.3435e-05	0.00412418	down	NW_018744187.1	166105	167990	-	--	--	--	--	uncharacterized protein LOC110700373 isoform X2 [Chenopodium quinoa]	--	--	--	--	--
novel.3343	0.932506	0.50722	0.210217	2.45556	1.85579	3.56116	300	168	63	638	537	1003	2.38961	4.91435e-05	0.00688198	up	NW_018743292.1	11347377	11350918	-	--	--	--	--	sporozoite surface protein 2-like [Chenopodium quinoa]	--	SubName: Full=Uncharacterized protein {ECO:0000313|EMBL:KNA25504.1};	--	--	--
novel.8293	1.79834	0.313151	1.50044	0	0.065686	0.057486	122	22	95	0	5	4	-4.68529	0.000117227	0.0120599	down	NW_018745470.1	1901033	1902707	+	--	--	--	--	--	--	--	--	--	--
novel.3140	2.12631	1.11873	1.48837	0	0.12064	0.104307	68	37	44	0	4	3	-4.29123	0.000165786	0.0149886	down	NW_018743252.1	6369124	6369467	-	--	--	--	--	--	--	--	--	--	--
novel.5344	4.79058	5.73816	10.3794	1.14512	1.43406	2.60332	395	487	791	77	107	188	-2.00558	9.00589e-05	0.00993981	down	NW_018744167.1	2437977	2438973	+	--	--	--	--	--	--	--	--	--	--
novel.6215	0.330846	0.079438	0	7.38819	4.54644	4.46195	16	4	0	288	198	189	5.5623	1.42831e-07	7.12187e-05	up	NW_018744616.1	3113827	3114787	-	--	--	--	--	--	--	--	--	--	--
novel.6562	2.42925	2.6781	2.59259	0.019523	0.368124	0.632128	290	329	286	2	40	67	-3.01096	0.000432932	0.0293563	down	NW_018744718.1	283457	284739	.	--	--	--	--	--	--	--	--	--	--
novel.7844	0	0	0	2.11659	0.914322	1.21142	0	0	0	191	92	118	9.96261	2.75699e-11	4.12409e-08	up	NW_018745286.1	5767430	5768625	.	--	--	--	--	hypothetical protein SOVF_011120 [Spinacia oleracea]	--	SubName: Full=Uncharacterized protein {ECO:0000313|EMBL:KNA24931.1};	--	--	PF14392.6:Zinc knuckle
novel.4397	0	0	0	4.57456	3.69172	3.21532	0	0	0	161	144	122	9.97495	1.68345e-12	2.91583e-09	up	NW_018743858.1	1397500	1397965	.	--	--	--	--	--	--	--	--	--	--
novel.6880	0	0	0	0	3.83935	2.68098	0	0	0	0	180	122	9.12229	0.000157581	0.0144856	up	NW_018744874.1	2853275	2853833	.	--	--	K14488 SAUR family protein | (RefSeq) auxin-induced protein 15A (A)	ko04075: Plant hormone signal transduction	hypothetical protein SOVF_098920 [Spinacia oleracea]	RecName: Full=Auxin-responsive protein SAUR19 {ECO:0000305}; AltName: Full=Protein SMALL AUXIN UP RNA 19 {ECO:0000303|PubMed:12036261};	SubName: Full=Uncharacterized protein {ECO:0000313|EMBL:KNA15363.1};	--	GO:0019897,extrinsic component of plasma membrane; GO:0009734,auxin-activated signaling pathway; GO:0007275,multicellular organism development; GO:0030307,positive regulation of cell growth; GO:2000012,regulation of auxin polar transport	PF02519.14:Auxin responsive protein
novel.272	2.4943	7.55411	1.70823	6.94738	19.2372	20.1196	208	649	132	468	1442	1469	2.02616	0.000565905	0.0348974	up	NW_018742205.1	6760629	6761525	.	--	--	--	--	hypothetical protein BVRB_7g157390 [Beta vulgaris subsp. vulgaris]	--	SubName: Full=Uncharacterized protein {ECO:0000313|EMBL:KNA05848.1};	--	--	--
novel.5055	195.362	221.392	299.247	47.5591	112.505	113.163	26040	30392	36878	5119	13477	13206	-1.3999	6.12221e-05	0.00796347	down	NW_018744080.1	1921559	1922992	.	--	--	--	--	hypothetical protein BVRB_3g061120 [Beta vulgaris subsp. vulgaris]	--	--	--	--	--
novel.4813	4.28646	4.70588	3.76159	1.08616	1.55322	1.16124	1132	1280	918	232	369	269	-1.63937	4.02263e-08	2.36394e-05	down	NW_018743979.1	20860	28480	+	--	--	K04424 sterile alpha motif and leucine zipper containing kinase AZK [EC:2.7.11.25] | (RefSeq) probable serine/threonine-protein kinase SIS8 (A)	--	protein MAINTENANCE OF MERISTEMS-like [Chenopodium quinoa]	--	SubName: Full=Uncharacterized protein {ECO:0000313|EMBL:KMS96342.1};	--	--	PF10536.9:Plant mobile domain
novel.8651	1.2686	0.136442	1.64334	0	0	0	52	6	63	0	0	0	-7.5869	0.000213822	0.0177427	down	NW_018745684.1	3248510	3248950	.	--	--	--	--	--	--	--	--	--	--
novel.8041	2.0223	2.5556	1.05162	2.52021	6.03504	5.65782	534	695	257	537	1431	1307	1.38388	0.000463028	0.0307098	up	NW_018745410.1	1876358	1879867	+	--	--	K19984 exocyst complex component 5 | (RefSeq) uncharacterized protein LOC113272286 (A)	--	uncharacterized protein LOC110710692 [Chenopodium quinoa]	RecName: Full=Putative AC transposase; AltName: Full=ORFA;	SubName: Full=zinc finger BED domain-containing protein RICESLEEPER 2-like {ECO:0000313|RefSeq:XP_016740977.1, ECO:0000313|RefSeq:XP_016742294.1};	Tam3-transposase (Ac family)	GO:0003677,DNA binding; GO:0046983,protein dimerization activity; GO:0006310,DNA recombination; GO:0032196,transposition	--
