# Supplementary material for: Transcriptome and Metabolome Analyses Reveal Mechanisms Underlying the Response of Quinoa Seedlings to Nitrogen Fertilizers
Source: Int J Mol Sci. 2023 Jul 18;24(14):11580. doi: 10.3390/ijms241411580 (PMC10380953; doi:10.3390/ijms241411580)
Supplement: Supplementary file 1 [file ijms-24-11580-s001.zip › Table S9.xlsx]

## Sheet: Sheet1
Table S9 Differential genes of white quinoa in LN vs CK
ID	W2-4_fpkm	W2-5_fpkm	W2-6_fpkm	W1-4_fpkm	W1-5_fpkm	W1-6_fpkm	W2-4_count	W2-5_count	W2-6_count	W1-4_count	W1-5_count	W1-6_count	log2FoldChange	pvalue	padj	regulated	chr	start	end	strand	gene_name	gene_description	KEGG	KEGG pathway	NR	Swissprot	Tremble	KOG	GO	Pfam
gene-CDC77_pgt018	50.27	48.75	197.47	0	3.49	0	58	79	317	0	5	0	-6.3883	2.82365e-05	0.0312413	down	NC_034949.1	55267	55339	-	trnM-CAU	--	--	--	--	--	--	--	--	--
gene-CDC77_pgt019	112	46.87	159.16	10.81	4.81	1.96	131	77	259	17	7	3	-4.1983	1.43612e-06	0.00354457	down	NC_034949.1	55512	56177	+	trnV-UAC	--	--	--	--	--	--	--	--	--
gene-LOC110689817	2.94	3.69	0.01	0	0	0	159	280	1	0	0	0	-9.67903	1.73336e-05	0.0231735	down	NW_018743977.1	3601682	3607071	-	LOC110689817	--	K15255 ATP-dependent DNA helicase PIF1 [EC:3.6.4.12] | (RefSeq) ATP-dependent DNA helicase PIF1-like (A)	--	uncharacterized protein LOC110689817 isoform X1 [Chenopodium quinoa]	--	SubName: Full=uncharacterized protein LOC108984871 {ECO:0000313|RefSeq:XP_018812501.1};	DNA helicase PIF1/RRM3	--	PF14214.6:Helitron helicase-like domain at N-terminus
gene-LOC110691775	59.82	36.49	1.95	1.15	1.64	1.56	6558	5619	297	169	223	224	-4.42537	1.97694e-06	0.0042288	down	NW_018744092.1	1352206	1361510	+	LOC110691775	--	--	--	zinc finger MYM-type protein 1-like isoform X1 [Chenopodium quinoa]	--	SubName: Full=Putative transposase {ECO:0000313|EMBL:AAL86479.1};	--	GO:0005737,cytoplasm; GO:0005654,nucleoplasm; GO:0003677,DNA binding; GO:0046983,protein dimerization activity; GO:0000981,DNA-binding transcription factor activity, RNA polymerase II-specific	PF14291.6:Domain of unknown function (DUF4371)
gene-LOC110698240	230.86	127.75	0	0	0	0	5583	4339	0	0	0	0	-26.5519	1.07308e-11	3.44307e-07	down	NW_018742381.1	1316111	1320803	-	LOC110698240	--	K17525 chitinase domain-containing protein 1 | (RefSeq) rhodanese-like domain-containing protein 4, chloroplastic (A)	--	calcium sensing receptor, chloroplastic-like [Chenopodium quinoa]	RecName: Full=Calcium sensing receptor, chloroplastic; AltName: Full=Sulfurtransferase 3; Short=AtStr3; Flags: Precursor;	SubName: Full=Uncharacterized protein {ECO:0000313|EMBL:KMS97432.1};	--	GO:0009507,chloroplast; GO:0009534,chloroplast thylakoid; GO:0009535,chloroplast thylakoid membrane; GO:0016021,integral component of membrane; GO:0005739,mitochondrion; GO:0009579,thylakoid; GO:0071277,cellular response to calcium ion; GO:0009704,de-etiolation; GO:0090333,regulation of stomatal closure	PF00581.20:Rhodanese-like domain
gene-LOC110704496	51.61	45.61	0.64	0.2	0.11	0.16	1509	1873	26	8	4	6	-7.6622	1.07972e-10	9.2528e-07	down	NW_018744835.1	1679409	1682074	+	LOC110704496	--	--	--	UPF0481 protein At3g47200-like isoform X1 [Chenopodium quinoa]	RecName: Full=UPF0481 protein At3g47200;	SubName: Full=Uncharacterized protein {ECO:0000313|EMBL:KNA24929.1};	--	GO:0016021,integral component of membrane; GO:0005886,plasma membrane	PF03140.15:Plant protein of unknown function
gene-LOC110705090	14.28	14.87	20.14	39.26	50.45	41.31	184	269	361	680	808	698	1.43648	1.80867e-05	0.0232132	up	NW_018744874.1	1645550	1646616	+	LOC110705090	--	K13195 cold-inducible RNA-binding protein | (RefSeq) glycine-rich RNA-binding protein-like (A)	--	glycine-rich RNA-binding, abscisic acid-inducible protein-like [Chenopodium quinoa]	RecName: Full=Glycine-rich RNA-binding protein blt801 {ECO:0000250|UniProtKB:Q03250, ECO:0000303|PubMed:8639753}; AltName: Full=Low temperature-responsive RNA-binding protein {ECO:0000312|EMBL:AAB07749.1};	SubName: Full=Uncharacterized protein {ECO:0000313|EMBL:KNA17125.1};	FOG: RRM domain	GO:0003723,RNA binding; GO:0003697,single-stranded DNA binding; GO:0006397,mRNA processing; GO:0009737,response to abscisic acid; GO:0009409,response to cold; GO:0006351,transcription, DNA-templated	PF00076.22:RNA recognition motif. (a.k.a. RRM, RBD, or RNP domain)
gene-LOC110708544	43.7	3.49	6.41	1.69	0.97	0.76	1632	183	333	85	45	37	-3.92373	2.38885e-05	0.0273746	down	NW_018745024.1	9241806	9259457	+	LOC110708544	--	K15503 serine/threonine-protein phosphatase 6 regulatory ankyrin repeat subunit B | (RefSeq) uncharacterized protein LOC110720991 (A)	--	ankyrin-1-like [Chenopodium quinoa]	RecName: Full=Ankyrin repeat-containing protein At5g02620;	SubName: Full=Uncharacterized protein {ECO:0000313|EMBL:KNA11609.1};	FOG: Ankyrin repeat	GO:0005783,endoplasmic reticulum; GO:0016021,integral component of membrane; GO:0005886,plasma membrane	PF12796.7:Ankyrin repeats (3 copies)
gene-LOC110710093	51.9	8.45	63.37	1.26	1.91	1.69	1684	385	2861	55	77	72	-4.62631	2.25015e-10	1.44397e-06	down	NW_018745120.1	18418	26697	+	LOC110710093	--	K05929 phosphoethanolamine N-methyltransferase [EC:2.1.1.103] | (RefSeq) phosphoethanolamine N-methyltransferase-like isoform X1 (A)	ko00564: Glycerophospholipid metabolism	phosphoethanolamine N-methyltransferase-like isoform X1 [Chenopodium quinoa]	RecName: Full=Phosphoethanolamine N-methyltransferase; EC=2.1.1.103;	SubName: Full=Phosphoethanolamine N-methyltransferase {ECO:0000313|EMBL:AEY75253.1};	SAM-dependent methyltransferases	GO:0005737,cytoplasm; GO:0000234,phosphoethanolamine N-methyltransferase activity; GO:0006656,phosphatidylcholine biosynthetic process	PF08241.12:Methyltransferase domain
gene-LOC110719647	7.07	3.12	0.01	0.01	0	0	432	268	1	1	0	0	-9.48988	5.23317e-06	0.00987715	down	NW_018742484.1	7424111	7430757	+	LOC110719647	--	--	--	paramyosin-like [Chenopodium quinoa]	RecName: Full=COP1-interactive protein 1 {ECO:0000303|PubMed:7753789};	SubName: Full=Uncharacterized protein {ECO:0000313|EMBL:KNA25283.1};	--	GO:0009507,chloroplast; GO:0005856,cytoskeleton; GO:0005886,plasma membrane; GO:0005774,vacuolar membrane; GO:0005773,vacuole; GO:0003779,actin binding; GO:0009738,abscisic acid-activated signaling pathway; GO:0071215,cellular response to abscisic acid stimulus; GO:0009789,positive regulation of abscisic acid-activated signaling pathway; GO:0042306,regulation of protein import into nucleus; GO:00…	PF07765.12:KIP1-like protein
gene-LOC110723306	15.48	0.11	0.68	0	0	0	412	4	25	0	0	0	-9.9013	1.36588e-05	0.0208694	down	NW_018742726.1	2421482	2425034	-	LOC110723306	--	K22390 acid phosphatase type 7 | (RefSeq) purple acid phosphatase 2-like (A)	--	purple acid phosphatase 2-like [Chenopodium quinoa]	RecName: Full=Purple acid phosphatase 2; EC=3.1.3.2; AltName: Full=Manganese(II) purple acid phosphatase 2; Flags: Precursor;	RecName: Full=Purple acid phosphatase {ECO:0000256|RuleBase:RU361203}; EC=3.1.3.2 {ECO:0000256|RuleBase:RU361203};	Purple acid phosphatase	GO:0005576,extracellular region; GO:0003993,acid phosphatase activity; GO:0046872,metal ion binding	PF00149.28:Calcineurin-like phosphoesterase
gene-LOC110740327	22.48	10.18	0.08	0.03	0	0	616	392	3	1	0	0	-10.0156	3.43325e-07	0.00118016	down	NW_018742244.1	2675359	2679472	-	LOC110740327	--	K11820 N-hydroxythioamide S-beta-glucosyltransferase [EC:2.4.1.195] | (RefSeq) UDP-glycosyltransferase 74B1-like (A)	ko00380: Tryptophan metabolism; ko00966: Glucosinolate biosynthesis; ko01210: 2-Oxocarboxylic acid metabolism	7-deoxyloganetin glucosyltransferase-like [Chenopodium quinoa]	RecName: Full=7-deoxyloganetin glucosyltransferase; EC=2.4.1.324; AltName: Full=Genipin glucosyltransferase; AltName: Full=UDP-glucose glucosyltransferase 2; Short=GjUGT2; AltName: Full=UDP-glycosyltransferase 85A24;	SubName: Full=Uncharacterized protein {ECO:0000313|EMBL:KNA09171.1};	UDP-glucuronosyl and UDP-glucosyl transferase	GO:0035251,UDP-glucosyltransferase activity; GO:0008152,metabolic process	PF00201.18:UDP-glucoronosyl and UDP-glucosyl transferase
novel.7574	0	0	0	1.10098	1.9782	1.9726	0	0	0	85	152	164	9.51161	1.1535e-10	9.2528e-07	up	NW_018745170.1	1708406	1709243	.	--	--	K20667 beta-amyrin 28-monooxygenase [EC:1.14.13.201] | (RefSeq) beta-amyrin 28-oxidase-like (A)	--	uncharacterized protein LOC110706504 [Chenopodium quinoa]	RecName: Full=Putative ribonuclease H protein At1g65750; EC=3.1.26.4;	SubName: Full=Uncharacterized protein {ECO:0000313|EMBL:ONI28802.1}; Flags: Fragment;	FOG: Reverse transcriptase	GO:0046872,metal ion binding; GO:0003676,nucleic acid binding; GO:0004523,RNA-DNA hybrid ribonuclease activity	PF13456.6:Reverse transcriptase-like
novel.5119	0	0	0	0.725093	0.08833	0.680336	0	0	0	99	12	100	8.50532	7.07086e-06	0.0126042	up	NW_018744092.1	2300434	2301597	-	--	--	K11649 SWI/SNF related-matrix-associated actin-dependent regulator of chromatin subfamily C | (RefSeq) F-box and associated interaction domain protein (A)	--	F-box protein CPR30-like [Spinacia oleracea]	RecName: Full=Putative F-box protein At1g47790;	SubName: Full=Uncharacterized protein {ECO:0000313|EMBL:KNA13873.1};	--	--	PF00646.33:F-box domain
novel.583	0.214869	1.99141	6.15435	0	0	0	7	78	248	0	0	0	-9.16172	5.14282e-06	0.00987715	down	NW_018742329.1	4747102	4747506	.	--	--	--	--	hypothetical protein Ccrd_018134, partial [Cynara cardunculus var. scolymus]	--	SubName: Full=Uncharacterized protein {ECO:0000313|EMBL:KVI03573.1}; Flags: Fragment;	--	--	--
novel.2908	0	0	0	3.61165	2.53554	2.39789	0	0	0	145	102	105	9.27209	4.88744e-11	7.84091e-07	up	NW_018743198.1	16610	17048	.	--	--	--	--	--	--	--	--	--	--
novel.4736	7.36121	0.275705	1.82424	0	0	0	232	12	82	0	0	0	-9.39121	1.74633e-06	0.00400233	down	NW_018743955.1	2162505	2171402	-	--	--	K10268 F-box and leucine-rich repeat protein 2/20 | (RefSeq) F-box/LRR-repeat protein 2-like (A)	--	F-box/LRR-repeat protein 2-like [Chenopodium quinoa]	--	SubName: Full=Uncharacterized protein {ECO:0000313|EMBL:KNA05739.1};	--	--	--
novel.3952	0	0	0	0.701982	1.26125	3.58339	0	0	0	48	86	265	9.51554	1.87654e-08	8.60152e-05	up	NW_018743593.1	3912695	3913521	-	--	--	--	--	uncharacterized protein LOC110705993 [Chenopodium quinoa]	--	SubName: Full=Uncharacterized protein {ECO:0000313|EMBL:KNA06815.1};	--	--	--
novel.5462	14.885	5.01827	12.4348	0.183038	0	0	494	230	589	8	0	0	-7.54609	3.70539e-10	1.98152e-06	down	NW_018744239.1	8965686	8966162	.	--	--	--	--	hypothetical protein NitaCp025 [Nicotiana tabacum]	--	SubName: Full=Uncharacterized protein {ECO:0000313|EMBL:CAA77355.1, ECO:0000313|RefSeq:NP_054501.1};	--	GO:0009507,chloroplast; GO:0003743,translation initiation factor activity	--
novel.4897	0	0	0	1.39927	1.55695	0.71041	0	0	0	69	77	39	8.36086	3.67811e-07	0.00118016	up	NW_018744026.1	4745200	4745739	.	--	--	--	--	--	--	--	--	--	--
novel.4032	14.4464	0.524374	0.040555	0	0	0.023196	880	44	4	0	0	3	-8.49035	2.97784e-05	0.031849	down	NW_018743689.1	809373	810247	.	--	--	--	--	--	--	--	--	--	--
novel.1221	12.8446	5.66782	17.0143	2.15244	2.12708	1.65711	252	153	475	56	55	47	-2.50584	1.45527e-05	0.0212245	down	NW_018742523.1	524404	524684	.	--	--	K01601 ribulose-bisphosphate carboxylase large chain [EC:4.1.1.39] | (RefSeq) uncharacterized protein LOC112271745 (A)	ko00630: Glyoxylate and dicarboxylate metabolism; ko00710: Carbon fixation in photosynthetic organisms; ko01200: Carbon metabolism	hypothetical protein CQW23_30056 [Capsicum baccatum]	--	SubName: Full=Uncharacterized protein {ECO:0000313|EMBL:PHT30362.1};	--	--	--
novel.953	0	0	0.096818	0.595707	4.70921	3.75032	0	0	8	44	348	301	6.56676	2.34905e-05	0.0273746	up	NW_018742418.1	7132547	7133354	-	--	--	--	--	--	--	--	--	--	--
novel.970	9.88645	9.08004	0.0160004	0	0	0	1688	2137	4	0	0	0	-12.8326	8.70204e-06	0.0146955	down	NW_018742418.1	8810947	8814555	-	--	--	K21437 ankyrin repeat domain-containing protein 13 | (RefSeq) uncharacterized protein LOC112523844 (A)	--	zinc finger BED domain-containing protein RICESLEEPER 2-like [Chenopodium quinoa]	RecName: Full=Putative AC transposase; AltName: Full=ORFA;	SubName: Full=Uncharacterized protein {ECO:0000313|EMBL:EMJ14584.1};	Tam3-transposase (Ac family)	GO:0003677,DNA binding; GO:0046983,protein dimerization activity; GO:0006310,DNA recombination; GO:0032196,transposition	PF14372.6:Domain of unknown function (DUF4413)
novel.7010	61.0271	9.04477	57.2046	3.80017	7.09286	2.72766	9488	1938	12683	775	1450	605	-3.1328	1.9732e-05	0.0243508	down	NW_018744949.1	1237473	1239707	+	--	--	K02703 photosystem II P680 reaction center D1 protein [EC:1.10.3.9] | (RefSeq) psbA, CDC77_pgp084; PsbA (A)	ko00195: Photosynthesis	photosystem II protein D (chloroplast) [Ficus racemosa]	RecName: Full=Photosystem II protein D1 {ECO:0000255|HAMAP-Rule:MF_01379}; Short=PSII D1 protein {ECO:0000255|HAMAP-Rule:MF_01379}; EC=1.10.3.9 {ECO:0000255|HAMAP-Rule:MF_01379}; AltName: Full=32 kDa thylakoid membrane protein {ECO:0000303|Ref.1}; AltName: Full=Photosystem II Q(B) protein {ECO:0000255|HAMAP-Rule:MF_01379}; Flags: Precursor;	RecName: Full=Photosystem II {ECO:0000256|HAMAP-Rule:MF_01379}; Short=PSII D1 protein {ECO:0000256|HAMAP-Rule:MF_01379}; EC=1.10.3.9 {ECO:0000256|HAMAP-Rule:MF_01379}; AltName: Full=Photosystem II Q(B) protein {ECO:0000256|HAMAP-Rule:MF_01379};	--	GO:0009535,chloroplast thylakoid membrane; GO:0016021,integral component of membrane; GO:0009523,photosystem II; GO:0016168,chlorophyll binding; GO:0045156,electron transporter, transferring electrons within the cyclic electron transport pathway of photosynthesis activity; GO:0046872,metal ion binding; GO:0009772,photosynthetic electron transport in photosystem II; GO:0018298,protein-chromophore …	PF00124.19:Photosynthetic reaction centre protein
novel.8700	10.4752	1.098	0.033196	0	0	0	360	53	2	0	0	0	-9.78821	1.72805e-05	0.0231735	down	NW_018745684.1	8104817	8105310	.	--	--	K19995 secretory carrier-associated membrane protein | (RefSeq) uncharacterized LOC100825352 (A)	--	agamous-like MADS-box protein AGL80 [Chenopodium quinoa]	RecName: Full=Agamous-like MADS-box protein AGL80;	SubName: Full=agamous-like MADS-box protein AGL80 {ECO:0000313|RefSeq:XP_010240843.1};	MADS box transcription factor	GO:0005634,nucleus; GO:0043078,polar nucleus; GO:0003700,DNA-binding transcription factor activity; GO:0046983,protein dimerization activity; GO:0000987,proximal promoter sequence-specific DNA binding; GO:0043565,sequence-specific DNA binding; GO:0000982,transcription factor activity, RNA polymerase II proximal promoter sequence-specific DNA binding; GO:0045944,positive regulation of transcriptio…	PF00319.18:SRF-type transcription factor (DNA-binding and dimerisation domain)
novel.5344	4.8997	3.92288	0.068269	0	0	0	302	334	7	0	0	0	-10.2703	1.54844e-07	0.000621042	down	NW_018744167.1	2437977	2438973	+	--	--	--	--	--	--	--	--	--	--
novel.5562	0	0	0	0.77264	0.908731	1.83342	0	0	0	40	47	103	8.42635	8.81121e-07	0.00235597	up	NW_018744290.1	2789879	2790439	.	--	--	--	--	--	--	--	--	--	--
novel.8567	0	0	0	0.85975	0.572326	0.468891	0	0	0	54	37	32	7.74952	1.16721e-05	0.0187255	up	NW_018745650.1	2479310	2480298	+	--	--	--	--	uncharacterized protein LOC110704263 [Chenopodium quinoa]	--	--	--	--	--
