# Supplementary material for: Transcriptome and Metabolome Analyses Reveal Mechanisms Underlying the Response of Quinoa Seedlings to Nitrogen Fertilizers
Source: Int J Mol Sci. 2023 Jul 18;24(14):11580. doi: 10.3390/ijms241411580 (PMC10380953; doi:10.3390/ijms241411580)
Supplement: Supplementary file 1 [file ijms-24-11580-s001.zip › Table S10.xlsx]

## Sheet: Sheet1
Table S10 Differential genes of white quinoa in HN vs CK
ID	W2-4_fpkm	W2-5_fpkm	W2-6_fpkm	W3-4_fpkm	W3-5_fpkm	W3-6_fpkm	W2-4_count	W2-5_count	W2-6_count	W3-4_count	W3-5_count	W3-6_count	log2FoldChange	pvalue	padj	regulated	chr	start	end	strand	gene_name	gene_description	KEGG	KEGG pathway	NR	Swissprot	Tremble	KOG	GO	Pfam
gene-LOC110698240	230.86	127.75	0	0	0	0	5583	4339	0	0	0	0	-28.1446	5.8457e-13	1.67286e-08	down	NW_018742381.1	1316111	1320803	-	LOC110698240	--	K17525 chitinase domain-containing protein 1 | (RefSeq) rhodanese-like domain-containing protein 4, chloroplastic (A)	--	calcium sensing receptor, chloroplastic-like [Chenopodium quinoa]	RecName: Full=Calcium sensing receptor, chloroplastic; AltName: Full=Sulfurtransferase 3; Short=AtStr3; Flags: Precursor;	SubName: Full=Uncharacterized protein {ECO:0000313|EMBL:KMS97432.1};	--	GO:0009507,chloroplast; GO:0009534,chloroplast thylakoid; GO:0009535,chloroplast thylakoid membrane; GO:0016021,integral component of membrane; GO:0005739,mitochondrion; GO:0009579,thylakoid; GO:0071277,cellular response to calcium ion; GO:0009704,de-etiolation; GO:0090333,regulation of stomatal closure	PF00581.20:Rhodanese-like domain
gene-LOC110701960	30.61	12.86	0.05	0	0	0	900	531	2	0	0	0	-11.6149	3.9766e-07	0.00284496	down	NW_018744662.1	1715601	1719716	-	LOC110701960	--	K00457 4-hydroxyphenylpyruvate dioxygenase [EC:1.13.11.27] | (RefSeq) 4-hydroxyphenylpyruvate dioxygenase-like (A)	ko00130: Ubiquinone and other terpenoid-quinone biosynthesis; ko00350: Tyrosine metabolism; ko00360: Phenylalanine metabolism	4-hydroxyphenylpyruvate dioxygenase-like [Chenopodium quinoa]	RecName: Full=4-hydroxyphenylpyruvate dioxygenase; EC=1.13.11.27; AltName: Full=4-hydroxyphenylpyruvic acid oxidase; Short=4HPPD; Short=HPD; Short=HPPDase;	RecName: Full=4-hydroxyphenylpyruvate dioxygenase {ECO:0000256|PIRNR:PIRNR009283};	4-hydroxyphenylpyruvate dioxygenase	GO:0005737,cytoplasm; GO:0003868,4-hydroxyphenylpyruvate dioxygenase activity; GO:0046872,metal ion binding; GO:0006559,L-phenylalanine catabolic process; GO:0006572,tyrosine catabolic process	PF00903.25:Glyoxalase/Bleomycin resistance protein/Dioxygenase superfamily
gene-LOC110715738	84.38	11.83	0.23	0.15	0	0	1295	255	5	3	0	0	-9.29375	6.1974e-06	0.0197057	down	NW_018745533.1	1914942	1916765	-	LOC110715738	--	K09705 uncharacterized protein | (RefSeq) uncharacterized protein LOC110715738 (A)	--	uncharacterized protein LOC110715738 [Chenopodium quinoa]	--	SubName: Full=Uncharacterized protein {ECO:0000313|EMBL:KMS95308.1};	--	GO:0005829,cytosol	PF06172.11:Cupin superfamily (DUF985)
gene-LOC110719647	7.07	3.12	0.01	0	0	0	432	268	1	0	0	0	-10.5778	1.27935e-05	0.0366112	down	NW_018742484.1	7424111	7430757	+	LOC110719647	--	--	--	paramyosin-like [Chenopodium quinoa]	RecName: Full=COP1-interactive protein 1 {ECO:0000303|PubMed:7753789};	SubName: Full=Uncharacterized protein {ECO:0000313|EMBL:KNA25283.1};	--	GO:0009507,chloroplast; GO:0005856,cytoskeleton; GO:0005886,plasma membrane; GO:0005774,vacuolar membrane; GO:0005773,vacuole; GO:0003779,actin binding; GO:0009738,abscisic acid-activated signaling pathway; GO:0071215,cellular response to abscisic acid stimulus; GO:0009789,positive regulation of abscisic acid-activated signaling pathway; GO:0042306,regulation of protein import into nucleus; GO:00…	PF07765.12:KIP1-like protein
gene-LOC110738050	29.64	11.53	0.03	0	0	0	617	337	1	0	0	0	-11.0377	4.01384e-06	0.014358	down	NW_018742244.1	135842	139472	+	LOC110738050	--	K01673 carbonic anhydrase [EC:4.2.1.1] | (RefSeq) beta carbonic anhydrase 5, chloroplastic-like (A)	ko00910: Nitrogen metabolism	beta carbonic anhydrase 5, chloroplastic-like [Chenopodium quinoa]	RecName: Full=Beta carbonic anhydrase 5, chloroplastic; Short=AtbCA5; Short=AtbetaCA5; EC=4.2.1.1; AltName: Full=Beta carbonate dehydratase 5; Flags: Precursor;	RecName: Full=Carbonic anhydrase {ECO:0000256|RuleBase:RU003956}; EC=4.2.1.1 {ECO:0000256|RuleBase:RU003956}; AltName: Full=Carbonate dehydratase {ECO:0000256|RuleBase:RU003956};	Predicted carbonic anhydrase involved in protection against oxidative damage	GO:0009507,chloroplast; GO:0004089,carbonate dehydratase activity; GO:0008270,zinc ion binding; GO:0015976,carbon utilization	PF00484.19:Carbonic anhydrase
novel.7002	0.0830581	0.735908	1.67886	3.24664	66.3351	202.096	11	132	309	577	14919	22468	6.47361	1.38444e-06	0.00792371	up	NW_018744946.1	8045	27290	+	--	--	--	--	hypothetical protein GLYMA_13G021700, partial [Glycine max]	--	SubName: Full=Uncharacterized protein {ECO:0000313|EMBL:KRH17852.1}; Flags: Fragment;	--	--	--
novel.5462	14.885	5.01827	12.4348	0	0	0	494	230	589	0	0	0	-11.3821	1.30044e-12	1.86074e-08	down	NW_018744239.1	8965686	8966162	.	--	--	--	--	hypothetical protein NitaCp025 [Nicotiana tabacum]	--	SubName: Full=Uncharacterized protein {ECO:0000313|EMBL:CAA77355.1, ECO:0000313|RefSeq:NP_054501.1};	--	GO:0009507,chloroplast; GO:0003743,translation initiation factor activity	--
novel.5808	10.7823	6.70485	0	0	0	0	1325	1136	0	0	0	0	-12.3532	3.21689e-06	0.0131511	down	NW_018744460.1	2098079	2099844	-	--	--	--	--	--	--	--	--	--	--
novel.2303	2.78519	0.416609	0.382474	0	0	0	213	44	43	0	0	0	-9.39969	1.46115e-05	0.0380126	down	NW_018742951.1	4002831	4005720	-	--	--	K15718 linoleate 9S-lipoxygenase [EC:1.13.11.58] | (RefSeq) probable linoleate 9S-lipoxygenase 5 (A)	ko00591: Linoleic acid metabolism	probable linoleate 9S-lipoxygenase 5 [Chenopodium quinoa]	RecName: Full=Probable linoleate 9S-lipoxygenase 3; EC=1.13.11.58;	RecName: Full=Lipoxygenase {ECO:0000256|RuleBase:RU003975}; EC=1.13.11.- {ECO:0000256|RuleBase:RU003975};	--	GO:0005737,cytoplasm; GO:0046872,metal ion binding; GO:0016702,oxidoreductase activity, acting on single donors with incorporation of molecular oxygen, incorporation of two atoms of oxygen; GO:0031408,oxylipin biosynthetic process	PF00305.19:Lipoxygenase
novel.970	9.88645	9.08004	0.0160004	0	0	0	1688	2137	4	0	0	0	-12.9439	4.14008e-09	3.94923e-05	down	NW_018742418.1	8810947	8814555	-	--	--	K21437 ankyrin repeat domain-containing protein 13 | (RefSeq) uncharacterized protein LOC112523844 (A)	--	zinc finger BED domain-containing protein RICESLEEPER 2-like [Chenopodium quinoa]	RecName: Full=Putative AC transposase; AltName: Full=ORFA;	SubName: Full=Uncharacterized protein {ECO:0000313|EMBL:EMJ14584.1};	Tam3-transposase (Ac family)	GO:0003677,DNA binding; GO:0046983,protein dimerization activity; GO:0006310,DNA recombination; GO:0032196,transposition	PF14372.6:Domain of unknown function (DUF4413)
novel.5344	4.8997	3.92288	0.068269	0	0	0	302	334	7	0	0	0	-10.3841	2.10501e-06	0.0100399	down	NW_018744167.1	2437977	2438973	+	--	--	--	--	--	--	--	--	--	--
