# Supplementary material for: Transcriptome and Metabolome Analyses Reveal Mechanisms Underlying the Response of Quinoa Seedlings to Nitrogen Fertilizers
Source: Int J Mol Sci. 2023 Jul 18;24(14):11580. doi: 10.3390/ijms241411580 (PMC10380953; doi:10.3390/ijms241411580)
Supplement: Supplementary file 1 [file ijms-24-11580-s001.zip › Table S11.xlsx]

## Sheet: Sheet1
Table S11 Differential genes of white quinoa in LN vs HN
ID	W1-4_fpkm	W1-5_fpkm	W1-6_fpkm	W3-4_fpkm	W3-5_fpkm	W3-6_fpkm	W1-4_count	W1-5_count	W1-6_count	W3-4_count	W3-5_count	W3-6_count	log2FoldChange	pvalue	padj	regulated	chr	start	end	strand	gene_name	gene_description	KEGG	KEGG pathway	NR	Swissprot	Tremble	KOG	GO	Pfam
gene-LOC110698867	1.19	1.81	7.76	0	0	0	20	28	127	0	0	0	-8.44865	3.01822e-05	0.0433609	down	NW_018744537.1	693818	694734	-	LOC110698867	--	--	--	uncharacterized protein LOC110698867 [Chenopodium quinoa]	--	SubName: Full=Uncharacterized protein {ECO:0000313|EMBL:KNA25661.1};	DNA helicase PIF1/RRM3	--	PF10950.8:Organ specific protein
gene-LOC110704909	2.12	2.43	9.08	0	0	0	33	35	138	0	0	0	-8.67318	4.89411e-06	0.0128903	down	NW_018744874.1	1431753	1432608	+	LOC110704909	--	--	--	organ-specific protein S2-like [Chenopodium quinoa]	--	SubName: Full=Uncharacterized protein {ECO:0000313|EMBL:KNA25661.1};	DNA helicase PIF1/RRM3	--	PF10950.8:Organ specific protein
gene-LOC110705094	1.05	2.37	24.4	0.1	0	0	21	44	478	2	0	0	-8.15208	2.54816e-05	0.0402686	down	NW_018744874.1	1669985	1671698	-	LOC110705094	--	K09522 DnaJ homolog subfamily C member 2 | (RefSeq) dnaJ homolog subfamily C member 2-like (A)	--	protein RADIALIS-like 2 [Chenopodium quinoa]	RecName: Full=Protein RADIALIS-like 6; Short=AtRL6; Short=Protein RAD-like 6; AltName: Full=Protein RADIALIS-LIKE SANT/MYB 3; Short=Protein RSM3;	SubName: Full=Uncharacterized protein {ECO:0000313|EMBL:KNA21422.1};	Zuotin and related molecular chaperones (DnaJ superfamily), contains DNA-binding domains	GO:0005634,nucleus; GO:0003677,DNA binding; GO:0003700,DNA-binding transcription factor activity; GO:0006355,regulation of transcription, DNA-templated; GO:0006351,transcription, DNA-templated	PF00249.31:Myb-like DNA-binding domain
novel.4011	0.515434	1.09412	0.460673	0	0	0	31	64	30	0	0	0	-7.94504	2.35992e-05	0.0402686	down	NW_018743649.1	210384	211022	.	--	--	--	--	--	--	--	--	--	--
novel.992	0.936094	0.965809	1.10796	0	0	0	39	41	50	0	0	0	-7.98057	7.28373e-06	0.0164435	down	NW_018742433.1	702620	703072	.	--	--	--	--	hypothetical protein SOVF_159840 [Spinacia oleracea]	--	SubName: Full=Uncharacterized protein {ECO:0000313|EMBL:KNA08750.1};	--	--	--
novel.2067	0.334281	1.04354	0.468691	0	0	0	32	99	48	0	0	0	-8.48174	3.36499e-06	0.0106354	down	NW_018742879.1	2655588	2657284	-	--	--	K22048 mechanosensitive ion channel protein 4/5/6/7/8/9/10 | (RefSeq) mechanosensitive ion channel protein 6-like (A)	--	mechanosensitive ion channel protein 6-like [Chenopodium quinoa]	--	--	--	--	--
novel.220	0.536128	0.15069	7.75608	0	0	0	28	8	440	0	0	0	-9.90008	1.54359e-05	0.0304918	down	NW_018742205.1	1814048	1814747	+	--	--	--	--	--	--	--	--	--	--
novel.98	0.158725	0.201618	0.682873	0	0	0	45	56	207	0	0	0	-9.25749	3.69152e-07	0.00192149	down	NW_018742204.1	13639027	13641315	-	--	--	K13459 disease resistance protein RPS2 | (RefSeq) probable disease resistance protein At4g27220 (A)	ko04626: Plant-pathogen interaction	probable disease resistance protein At4g27220 [Chenopodium quinoa]	--	SubName: Full=Uncharacterized protein {ECO:0000313|EMBL:ERN01292.1};	--	GO:0043531,ADP binding	--
novel.4505	0.127802	0.932407	2.39523	0	0	0	12	84	234	0	0	0	-9.38667	4.33725e-06	0.0124621	down	NW_018743911.1	76738	77718	.	--	--	--	--	--	--	--	--	--	--
novel.1858	1.17256	0.363136	0.453652	0	0	0	75	24	32	0	0	0	-7.9168	2.46149e-05	0.0402686	down	NW_018742770.1	2709286	2710323	-	--	--	--	--	uncharacterized protein LOC110690964 [Chenopodium quinoa]	--	SubName: Full=Uncharacterized protein {ECO:0000313|EMBL:KNA09889.1};	--	GO:0005524,ATP binding	--
novel.7646	1.23815	0.396098	0.447778	0	0	0	75	24	30	0	0	0	-7.89242	2.91699e-05	0.0433609	down	NW_018745177.1	1588124	1588778	.	--	--	--	--	--	--	--	--	--	--
novel.7634	0.322595	0.340565	0.299055	0	0	0	36	39	37	0	0	0	-7.76164	2.18981e-05	0.0402686	down	NW_018745177.1	138723	139945	.	--	--	--	--	proline-rich protein 36-like [Spinacia oleracea]	RecName: Full=Serine/threonine-protein phosphatase 7 long form homolog; EC=3.1.3.16; AltName: Full=Protein MAIN-LIKE 3 {ECO:0000303|PubMed:24635680};	SubName: Full=Uncharacterized protein {ECO:0000313|EMBL:KNA19998.1};	--	GO:0005634,nucleus; GO:0046872,metal ion binding; GO:0004721,phosphoprotein phosphatase activity	--
novel.5936	1.76017	0.185945	0.932811	0	0	0	134	15	77	0	0	0	-8.69256	5.54906e-06	0.0134911	down	NW_018744502.1	1480783	1482100	+	--	--	--	--	uncharacterized protein LOC110728682 [Chenopodium quinoa]	--	--	--	--	--
novel.2062	1.38018	0.32797	0.450806	0	0	0	85	21	30	0	0	0	-7.95571	3.47439e-05	0.0477441	down	NW_018742879.1	2209744	2210897	+	--	--	--	--	uncharacterized protein LOC110798719 [Spinacia oleracea]	--	SubName: Full=Uncharacterized protein {ECO:0000313|EMBL:KNA21107.1};	--	--	--
novel.3295	0.2538	1.04899	1.35291	0	0	0	28	114	159	0	0	0	-9.24531	3.92354e-07	0.00192149	down	NW_018743292.1	6080110	6081291	.	--	--	K14488 SAUR family protein | (RefSeq) auxin-induced protein 6B-like (A)	ko04075: Plant hormone signal transduction	hypothetical protein SOVF_162740 [Spinacia oleracea]	RecName: Full=Auxin-responsive protein SAUR32 {ECO:0000305}; AltName: Full=Protein ABOLISHED APICAL HOOK MAINTENANCE 1 {ECO:0000303|Ref.6}; AltName: Full=Protein SMALL AUXIN UP RNA 32 {ECO:0000303|PubMed:12036261};	SubName: Full=Uncharacterized protein {ECO:0000313|EMBL:KNA08427.1};	--	GO:0005737,cytoplasm; GO:0005634,nucleus; GO:0009734,auxin-activated signaling pathway; GO:0007275,multicellular organism development; GO:0040008,regulation of growth; GO:1900140,regulation of seedling development	PF02519.14:Auxin responsive protein
novel.4897	1.39927	1.55695	0.71041	0	0	0	69	77	39	0	0	0	-8.47578	6.27261e-07	0.00247815	down	NW_018744026.1	4745200	4745739	.	--	--	--	--	--	--	--	--	--	--
novel.1094	1.18324	0.884774	0.3719	0	0	0	82	62	28	0	0	0	-8.34207	2.43844e-06	0.00856324	down	NW_018742483.1	559970	562705	-	--	--	K05909 laccase [EC:1.10.3.2] | (RefSeq) laccase-2-like (A)	--	PREDICTED: uncharacterized mitochondrial protein AtMg00810-like [Capsicum annuum]	RecName: Full=Retrovirus-related Pol polyprotein from transposon RE1; AltName: Full=Retro element 1 {ECO:0000303|PubMed:10689195}; Short=AtRE1 {ECO:0000303|PubMed:10689195}; Includes: RecName: Full=Protease RE1; EC=3.4.23.-; Includes: RecName: Full=Reverse transcriptase RE1; EC=2.7.7.49; Includes: RecName: Full=Endonuclease RE1;	SubName: Full=Uncharacterized protein {ECO:0000313|EnsemblPlants:PGSC0003DMT400011503};	FOG: Transposon-encoded proteins with TYA, reverse transcriptase, integrase domains in various combinations	GO:0004190,aspartic-type endopeptidase activity; GO:0004519,endonuclease activity; GO:0046872,metal ion binding; GO:0003676,nucleic acid binding; GO:0003964,RNA-directed DNA polymerase activity; GO:0015074,DNA integration; GO:0006310,DNA recombination	--
novel.2303	0.388777	1.17307	0.668985	0	0	0	39	118	73	0	0	0	-8.84405	4.25565e-07	0.00192149	down	NW_018742951.1	4002831	4005720	-	--	--	K15718 linoleate 9S-lipoxygenase [EC:1.13.11.58] | (RefSeq) probable linoleate 9S-lipoxygenase 5 (A)	ko00591: Linoleic acid metabolism	probable linoleate 9S-lipoxygenase 5 [Chenopodium quinoa]	RecName: Full=Probable linoleate 9S-lipoxygenase 3; EC=1.13.11.58;	RecName: Full=Lipoxygenase {ECO:0000256|RuleBase:RU003975}; EC=1.13.11.- {ECO:0000256|RuleBase:RU003975};	--	GO:0005737,cytoplasm; GO:0046872,metal ion binding; GO:0016702,oxidoreductase activity, acting on single donors with incorporation of molecular oxygen, incorporation of two atoms of oxygen; GO:0031408,oxylipin biosynthetic process	PF00305.19:Lipoxygenase
novel.3528	0.194585	0.400132	0.554603	0	0	0	25	49	73	0	0	0	-8.19054	1.05025e-05	0.0221294	down	NW_018743373.1	1395076	1396965	+	--	--	--	--	uncharacterized protein LOC110776679 [Spinacia oleracea]	--	SubName: Full=Uncharacterized protein {ECO:0000313|EMBL:CCA66040.1};	FOG: Reverse transcriptase	GO:0003676,nucleic acid binding	PF13966.6:zinc-binding in reverse transcriptase
novel.3400	1.02286	0.45484	1.22326	0	0	0	108	48	140	0	0	0	-9.145	2.97054e-08	0.000469434	down	NW_018743331.1	91827	93090	-	--	--	--	--	uncharacterized protein LOC110720177 [Chenopodium quinoa]	--	SubName: Full=Uncharacterized protein {ECO:0000313|EMBL:KMS97991.1};	--	--	--
novel.8412	1.15449	0.912824	1.06005	0	0	0	66	53	66	0	0	0	-8.47429	2.65526e-07	0.00192149	down	NW_018745540.1	181039	181663	.	--	--	--	--	--	--	--	--	--	--
novel.4842	0	0	0	3.00373	8.29776	14.9993	0	0	0	153	534	477	10.9313	1.02984e-12	3.25491e-08	up	NW_018743979.1	3669582	3670107	.	--	--	--	--	uncharacterized protein LOC110713091 [Chenopodium quinoa]	--	SubName: Full=Uncharacterized protein {ECO:0000313|EMBL:KNA15804.1};	--	--	PF14303.6:No apical meristem-associated C-terminal domain
novel.5712	0.663429	0.554431	1.06048	0	0	0	57	48	99	0	0	0	-8.63242	3.63943e-07	0.00192149	down	NW_018744367.1	2361783	2362715	.	--	--	--	--	--	--	--	--	--	--
